# Supplementary material for: Molecular Action of Tamoxifen in the Ovaries of Rats with Mammary Neoplasia
Source: Int J Mol Sci. 2023 Oct 30;24(21):15767. doi: 10.3390/ijms242115767 (PMC10649132; doi:10.3390/ijms242115767)
Supplement: Supplementary file 1 [file ijms-24-15767-s001.zip]

Archive with 19 entries (19 files):
- supplementary/Figure S3.png
- supplementary/Figure S5.png
- supplementary/Figure.S1.png
- supplementary/Figure.S2.png
- supplementary/Figure.S4.tif
- supplementary/Supplementary Materials captions.pdf
- supplementary/Table S1.xlsx
- supplementary/Table S10.xlsx
- supplementary/Table S11.xlsx
- supplementary/Table S12.xlsx
- supplementary/Table S13.xlsx
- supplementary/Table S2.xlsx
- supplementary/Table S3.xlsx
- supplementary/Table S4.xlsx
- supplementary/Table S5.xlsx
- supplementary/Table S6.pdf
- supplementary/Table S7.xlsx
- supplementary/Table S8.xlsx
- supplementary/Table S9.xlsx
