# Supplementary material for: Molecular Action of Tamoxifen in the Ovaries of Rats with Mammary Neoplasia
Source: Int J Mol Sci. 2023 Oct 30;24(21):15767. doi: 10.3390/ijms242115767 (PMC10649132; doi:10.3390/ijms242115767)
Supplement: Supplementary file 1 [file ijms-24-15767-s001.zip › supplementary/Supplementary Materials captions.pdf]

### **Supplementary Materials:**

**Figure S1:** Interaction network of differentially expressed genes (DEGs) identified as negatively regulated by DELs in the ovaries collected from rats treated with tamoxifen *vs.* untreated rats. The network was generated by STRING (confidence score: 0.7) using DEGs (P-adjusted < 0.05 and log<sub>2</sub> fold change ≥ 1.0) belonging to the GO “steroid metabolic process” term (GO:0008202). Enrichment P-value:  $1.0 \times 10^{-16}$ ;

**Figure S2:** Interaction network of differentially expressed genes (DEGs) identified as positively regulated by DELs in the ovaries collected from rats treated with tamoxifen *vs.* untreated rats. The network was generated by STRING (confidence score: 0.7) using DEGs (P-adjusted < 0.05 and log<sub>2</sub> fold change ≥ 1.0) belonging to the GO “epithelial cell proliferation” term (GO:0050673). Enrichment P-value:  $1.0 \times 10^{-16}$ ;

**Figure S3:** Real-time PCR validation of two selected differentially expressed genes (DEGs) which were identified by RNA-Seq in the ovaries of rats treated with tamoxifen (TAM) (n=4 biological replicates). Data were expressed as arbitrary units (AU; mean ± SEM). Statistical analysis was performed using t-student test, \*P < 0.05;

**Figure S4:** Representative image (an overlay of Cy3 - green and Cy5 - red channel images) of 2D-DIGE separation of proteins isolated from the ovaries collected from rats treated with tamoxifen *vs.* untreated control rats. Circles depict differentially expressed protein spots and shortcuts describe proteins identified by mass spectrometry;

**Figure S5.** Tamoxifen (TAM)-induced changes in the expression level of selected differentially expressed genes (DEGs) related to ovarian steroidogenesis (A) and follicle transition (B). Data are expressed as mean of log<sub>10</sub>(counts+1). Panel C presents the same changes expressed as log<sub>2</sub> fold change values. Statistical analysis was performed by means of R statistical software (version 4.2.1.) using the DESeq2 package (version 1.36.0; doi: 10.1186/s13059-014-0550-8). \*\*P-adjusted ≤ 0.01, \*\*\* P-adjusted ≤ 0.001;

**Table S1:** Primers and probes used for real-time PCR;

**Table S2:** Summary of sequence read alignments to the reference genome;

**Table S3:** Differentially expressed genes (DEGs) identified in the ovaries of tumor-bearing rats treated with tamoxifen (TAM);

**Table S4:** Functional enrichment analysis (GO) of the differentially expressed genes identified in ovaries of tumor-bearing rats treated with tamoxifen;

**Table S5:** KEGG enrichment analysis of the differentially expressed genes identified in ovaries of tumor-bearing rats treated with tamoxifen;

**Table S6:** The comparison of lncRNAs and protein coding transcripts;

**Table S7:** Differentially expressed lncRNA ( $\log_2FC \geq 1$  and  $p_{adj} \leq 0.05$ ) identified in the ovaries of tumor-bearing rats treated with tamoxifen;

**Table S8:** Target DEGs predicted to be potentially cis-regulated by DELs;

**Table S9:** Functional enrichment analysis (GO) of the co-expressed cis-target genes predicted to be regulated by differentially expressed lncRNAs identified in the ovaries of tumor-bearing rats treated with tamoxifen;

**Table S10:** The Pearson correlation between expression patterns of trans-regulated DEGs and DELs identified in the ovaries of tumor-bearing rats treated with tamoxifen;

**Table S11:** Target DEGs predicted to be potentially trans-regulated by DELs;

**Table S12:** Functional enrichment analysis (GO) of the negatively correlated co-expressed trans-target genes predicted to be regulated by differentially expressed lncRNAs identified in the ovaries of tumor-bearing rats treated with tamoxifen;

**Table S13:** Functional enrichment analysis (GO) of the positively correlated co-expressed trans-target genes predicted to be regulated by differentially expressed lncRNAs identified in the ovaries of tumor-bearing rats treated with tamoxifen.
