# Supplementary material for: Molecular Action of Tamoxifen in the Ovaries of Rats with Mammary Neoplasia
Source: Int J Mol Sci. 2023 Oct 30;24(21):15767. doi: 10.3390/ijms242115767 (PMC10649132; doi:10.3390/ijms242115767)
Supplement: Supplementary file 1 [file ijms-24-15767-s001.zip › supplementary/Table S1.xlsx]

## Sheet: Table S1
Supplementary Table S1. Primers and probes used for real-time PCR.
	Gene Description	Gene symbol	Assay ID*
	Hypoxanthine phosphoribosyltransferase 1 (reference gene)	HPRT1	Rn01527840_m1
	β-actin (reference gene)	ACTB	Rn00667869_m1
	Protease, serine, 32	PRSS32	APAAH3U
	Kallikrein-related peptidase 7	Klk7	Rn01764380_m1
	Phospholipase A2, group 1B	Pla2g1b	Rn00580896_m1
	Anti-mullerian hormone	Amh	Rn00563731_g1
	Relaxin 1	Rln1	AP9HTP3
	*Thermofisher Scientific
