# Supplementary material for: Molecular Action of Tamoxifen in the Ovaries of Rats with Mammary Neoplasia
Source: Int J Mol Sci. 2023 Oct 30;24(21):15767. doi: 10.3390/ijms242115767 (PMC10649132; doi:10.3390/ijms242115767)
Supplement: Supplementary file 1 [file ijms-24-15767-s001.zip › supplementary/Table S2.xlsx]

## Sheet: Arkusz1
Supplementary Table S2. Summary of sequence read alignments to the reference genome
Sample ID	reads before QC	reads after QC	mapped reads	uniquely mapped reads	mapped efficiency	expressed genes
CT1	39938354	37857095	37389517	35720739	95.537	20023
CT2	40475764	38300538	37898100	36302822	95.791	20231
CT3	40531185	38328852	37882057	36154124	95.439	20040
CT4	38628725	36641150	36235178	34573294	95.414	19805
TAM1	40504908	38471293	38080513	36204961	95.075	20230
TAM2	36828707	35121294	34755479	33033467	95.045	20049
TAM3	40496989	38435881	37990977	36185067	95.246	20221
TAM4	39481451	37401110	36970393	35491161	95.999	19843
QC: quality control
