# Supplementary material for: Molecular Action of Tamoxifen in the Ovaries of Rats with Mammary Neoplasia
Source: Int J Mol Sci. 2023 Oct 30;24(21):15767. doi: 10.3390/ijms242115767 (PMC10649132; doi:10.3390/ijms242115767)
Supplement: Supplementary file 1 [file ijms-24-15767-s001.zip › supplementary/Table S3.xlsx]

## Sheet: Tab. S3
Supplementary Table S3. Differentially expressed genes (DEGs) identified in the ovaries of tumor-bearing rats treated with tamoxifen (TAM)
Number	Ensembl ID	Gene Symbol	Gene description	log2 fold change	padj
1	ENSRNOG00000013439	Cpn1	carboxypeptidase N subunit 1	-6.033037432886774	6.677356644076425e-4
2	ENSRNOG00000013496	Crisp3	cysteine-rich secretory protein 3	-5.809542491794864	6.04274862783096e-6
3	ENSRNOG00000012197	Bpifb2	BPI fold containing family B, member 2	-5.722256968549836	9.083852498548741e-5
4	ENSRNOG00000008603	Gpr25	G protein-coupled receptor 25	-5.653924040969191	3.0652313459962572e-27
5	ENSRNOG00000043375	Tmigd3	transmembrane and immunoglobulin domain containing 3	-5.639070457216452	1.4983612532926317e-6
6	ENSRNOG00000006709	Pzp	pregnancy-zone protein	-5.318077586034626	1.5881307735102617e-13
7	ENSRNOG00000061101	Ripply1	ripply transcriptional repressor 1	-5.30353797969433	7.507693579383821e-5
8	ENSRNOG00000069584	Rnase1l2	ribonuclease, RNase A family, 1-like 2 (pancreatic)	-5.275062528498667	2.1354778501107715e-5
9	ENSRNOG00000060867	Rln1	relaxin 1	-5.109165548471848	3.4300739866376768e-6
10	ENSRNOG00000062245	Ndufa10l1	NADH dehydrogenase (ubiquinone) 1 alpha subcomplex 10-like 1	-5.1085452887138905	0.0021578753228699904
11	ENSRNOG00000009054	Elmod1	ELMO domain containing 1	-4.910778647382384	1.6944094204224622e-4
12	ENSRNOG00000001005	Fcer2	Fc epsilon receptor II	-4.8790521574407375	1.410565964292999e-20
13	ENSRNOG00000007730	Vom2r53	vomeronasal 2 receptor, 53	-4.877964210492918	1.1335986079433907e-6
14	MSTRG.16924	MSTRG.16924	-	-4.499376451773035	0.002025649078530662
15	ENSRNOG00000036622	Glyatl1	glycine-N-acyltransferase-like 1	-4.465375383979634	0.0019240638950561732
16	ENSRNOG00000069664	ENSRNOG00000069664	-	-4.339516310308194	2.0511667176092568e-5
17	ENSRNOG00000034174	Bpifb4	BPI fold containing family B, member 4	-4.3344587013750235	1.3584135520583784e-6
18	ENSRNOG00000020655	Ucn2	urocortin 2	-4.2874249786796215	1.9731729964496352e-7
19	ENSRNOG00000018054	F2rl2	coagulation factor II (thrombin) receptor-like 2	-4.2303778082931975	0.014337017216963578
20	ENSRNOG00000001416	Vgf	VGF nerve growth factor inducible	-4.219190823728793	0.0014988221676755125
21	MSTRG.9891	MSTRG.9891	-	-4.2027045213900145	2.474750241757575e-8
22	ENSRNOG00000011107	Pcsk1	proprotein convertase subtilisin/kexin type 1	-4.135910007151852	5.184025647563481e-4
23	ENSRNOG00000017873	Sct	secretin	-4.12351357669644	1.2430557029287748e-6
24	ENSRNOG00000016837	Ckm	creatine kinase, M-type	-4.06853232588719	3.170460929690016e-4
25	ENSRNOG00000032569	Lingo3	leucine rich repeat and Ig domain containing 3	-4.004953654450786	9.685094571189857e-4
26	ENSRNOG00000026051	ENSRNOG00000026051	-	-3.982898702304551	1.2525034389267575e-16
27	ENSRNOG00000067729	ENSRNOG00000067729	-	-3.966088756951331	1.1639412346531016e-6
28	ENSRNOG00000013279	LOC681458	similar to stearoyl-coenzyme A desaturase 3	-3.9576088784420547	1.7262410076731807e-4
29	ENSRNOG00000014025	Rasgrf1	RAS protein-specific guanine nucleotide-releasing factor 1	-3.951113203996307	1.5895197981271387e-12
30	ENSRNOG00000070797	ENSRNOG00000070797	-	-3.891884079359143	2.3501013077549736e-13
31	ENSRNOG00000026848	Tex36	testis expressed 36	-3.8845091285072995	0.0033580725742235955
32	ENSRNOG00000001153	Pla2g1b	phospholipase A2 group IB	-3.826948877293279	2.8592021764931555e-8
33	ENSRNOG00000027392	Ccdc187	coiled-coil domain containing 187	-3.823551763070245	0.020282293659894507
34	ENSRNOG00000004009	Xpnpep2	X-prolyl aminopeptidase 2	-3.8085975947764186	6.626335830698293e-7
35	ENSRNOG00000020985	Atp4a	ATPase H+/K+ transporting subunit alpha	-3.7889813216687793	0.005477605829200203
36	ENSRNOG00000009390	Edn2	endothelin 2	-3.78818912948075	0.011299286968775558
37	ENSRNOG00000065886	H3c13	H3 clustered histone 13	-3.783699265145093	1.3371863152832498e-4
38	ENSRNOG00000032108	RGD1564447	similar to Zgc:56193	-3.7796136513800667	2.0302125234373707e-5
39	ENSRNOG00000019417	Hsd3b5	hydroxy-delta-5-steroid dehydrogenase, 3 beta- and steroid delta-isomerase 5	-3.694551400810479	0.008159929375730287
40	ENSRNOG00000026607	Tnfsf18	TNF superfamily member 18	-3.6839454256379294	0.016293723468325715
41	ENSRNOG00000009610	ENSRNOG00000009610	-	-3.6810480945051567	3.6822895475932706e-4
42	ENSRNOG00000011423	Pitx1	paired-like homeodomain 1	-3.665287142958187	5.416604254662298e-4
43	ENSRNOG00000004578	Cthrc1	collagen triple helix repeat containing 1	-3.6594303614776162	4.5311595914353745e-5
44	ENSRNOG00000004697	Baalc	BAALC binder of MAP3K1 and KLF4	-3.652494526764682	4.868239852253181e-18
45	ENSRNOG00000020196	Scgb1a1	secretoglobin family 1A member 1	-3.6215617325855964	1.7448863990494483e-4
46	ENSRNOG00000065655	ENSRNOG00000065655	-	-3.6215602963731994	0.0022696787050781346
47	ENSRNOG00000020272	Elapor1	endosome-lysosome associated apoptosis and autophagy regulator 1	-3.6114485843860193	7.366386297258311e-5
48	ENSRNOG00000019118	Slc13a3	solute carrier family 13 member 3	-3.5927231771364423	0.010432751499171772
49	ENSRNOG00000017510	Mfge8	milk fat globule EGF and factor V/VIII domain containing	-3.5400669152361592	1.2889455466304842e-10
50	ENSRNOG00000010430	Tmem40	transmembrane protein 40	-3.5359550237118906	0.01544539657375646
51	ENSRNOG00000009875	Akr1b7	aldo-keto reductase family 1, member B7	-3.518642739160629	3.3210277707007544e-7
52	ENSRNOG00000030726	Asgr2	asialoglycoprotein receptor 2	-3.5102785944248294	2.3132875918691452e-23
53	ENSRNOG00000007886	Orm1	orosomucoid 1	-3.4777562127872903	7.105794875692824e-13
54	ENSRNOG00000020030	Crlf1	cytokine receptor-like factor 1	-3.467168757399396	0.0017124450443439488
55	ENSRNOG00000014603	Sgcg	sarcoglycan, gamma	-3.4529156322030996	1.1197138670787721e-13
56	ENSRNOG00000026037	Plb1	phospholipase B1	-3.446667780641976	0.01056240534756202
57	ENSRNOG00000012593	Mmel1	membrane metallo-endopeptidase-like 1	-3.4459474547148683	1.3370036878917364e-6
58	ENSRNOG00000030914	Lexm	lymphocyte expansion molecule	-3.415203180177533	3.7316220085261944e-4
59	ENSRNOG00000010337	Slc13a2	solute carrier family 13 member 2	-3.4088164684341695	2.9588731595903403e-6
60	ENSRNOG00000025608	Lrat	lecithin retinol acyltransferase	-3.4073751476152245	2.2152900232030482e-4
61	ENSRNOG00000067321	ENSRNOG00000067321	-	-3.4013889137707807	3.747950377320978e-4
62	ENSRNOG00000017982	Pnliprp2	pancreatic lipase related protein 2	-3.3934073612514455	4.555388777150753e-4
63	ENSRNOG00000032626	Mmp3	matrix metallopeptidase 3	-3.388467735581897	1.6926011147395497e-4
64	ENSRNOG00000071212	ENSRNOG00000071212	-	-3.382075344284007	4.0464260167213655e-12
65	ENSRNOG00000069743	Nxpe5l1	neurexophilin and PC-esterase domain family, member 5-like 1	-3.380058405749293	1.3046446736556991e-6
66	ENSRNOG00000053476	ENSRNOG00000053476	-	-3.356837594190268	0.0025110501542163874
67	ENSRNOG00000028896	A2m	alpha-2-macroglobulin	-3.317270465516666	1.5281383911638817e-45
68	ENSRNOG00000005266	Amdhd1	amidohydrolase domain containing 1	-3.3140956136622934	0.017489148670365818
69	ENSRNOG00000059092	Olr154	olfactory receptor 154	-3.309430601184379	2.4063067151762954e-5
70	ENSRNOG00000017716	Ucp3	uncoupling protein 3	-3.3086052928705536	1.6387905050769464e-5
71	ENSRNOG00000067701	ENSRNOG00000067701	-	-3.2944890130021376	3.132941245248272e-8
72	ENSRNOG00000036942	Tnfrsf9	TNF receptor superfamily member 9	-3.271192039772948	1.3708669319104316e-33
73	ENSRNOG00000064059	Olr155	olfactory receptor 155	-3.262110563355985	1.488775318750211e-11
74	ENSRNOG00000063643	LOC299190	similar to 60S ribosomal protein L23a	-3.2620636047362543	0.0015578695901348302
75	ENSRNOG00000070697	Olr1353	olfactory receptor 1353	-3.244579692012323	0.03089507126798759
76	ENSRNOG00000047928	LOC683573	similar to response gene to complement 32	-3.2352379608003003	1.2135489255514091e-5
77	ENSRNOG00000050647	Hspa1a	heat shock protein family A (Hsp70) member 1A	-3.2228338247484802	5.255524290276885e-18
78	ENSRNOG00000064025	Hist1h2ao	histone cluster 1, H2ao	-3.2137116232237	2.802747488206343e-15
79	ENSRNOG00000021714	Cibar2	CBY1 interacting BAR domain containing 2	-3.2098830160008283	0.0027274100909275905
80	MSTRG.4435	MSTRG.4435	-	-3.20847286019781	1.1193978819479201e-10
81	ENSRNOG00000063463	ENSRNOG00000063463	-	-3.204076887212998	0.007886710371938324
82	MSTRG.9597	MSTRG.9597	-	-3.203274354768392	1.121164246007944e-5
83	ENSRNOG00000019441	Hsd3b2	hydroxy-delta-5-steroid dehydrogenase, 3 beta- and steroid delta-isomerase 2	-3.195083883471599	5.657106883944076e-7
84	MSTRG.14772	MSTRG.14772	-	-3.1938078872237075	4.3082184835898566e-7
85	ENSRNOG00000027916	Txndc2	thioredoxin domain containing 2	-3.174613654814631	3.6900059085993707e-4
86	ENSRNOG00000017725	Pnlip	pancreatic lipase	-3.1713060877567183	0.03459806558055313
87	ENSRNOG00000070362	Hist1h2bg	histone cluster 1, H2bg	-3.156064927693253	1.4333586892301118e-5
88	ENSRNOG00000020888	Fgf3	fibroblast growth factor 3	-3.1382943002643544	0.02251602956161389
89	ENSRNOG00000065394	ENSRNOG00000065394	-	-3.12428145633446	4.207125187594895e-12
90	ENSRNOG00000001338	Hpd	4-hydroxyphenylpyruvate dioxygenase	-3.115648159759249	0.0032486301722203744
91	ENSRNOG00000023861	Snap91	synaptosome associated protein 91	-3.0797179221316364	1.1839652908287839e-20
92	ENSRNOG00000059401	Ccdc40	coiled-coil domain containing 40	-3.053246499733277	0.0010891986803581533
93	ENSRNOG00000031167	ENSRNOG00000031167	-	-3.0321627020730055	5.863883592549345e-7
94	ENSRNOG00000050318	ENSRNOG00000050318	-	-3.0182736236716656	1.8480287713367652e-13
95	ENSRNOG00000069278	LOC680825	hypothetical protein LOC680825	-3.016277492700909	1.2835395501868327e-4
96	ENSRNOG00000006604	Thy1	Thy-1 cell surface antigen	-3.011819392890426	2.4563027206975617e-19
97	ENSRNOG00000037485	LOC688924	hypothetical protein LOC688924	-2.9979976216305757	0.002373454950482629
98	ENSRNOG00000003386	Rbfox3	RNA binding fox-1 homolog 3	-2.984074838902864	4.843164383459098e-15
99	ENSRNOG00000011861	Aadat	aminoadipate aminotransferase	-2.9797235516989713	1.5782024260177017e-4
100	ENSRNOG00000022321	Hapln3	hyaluronan and proteoglycan link protein 3	-2.9672445584258247	3.7316220085261944e-4
101	ENSRNOG00000002202	Sowahb	sosondowah ankyrin repeat domain family member B	-2.9617323796898773	0.010586124715662244
102	ENSRNOG00000011490	Angptl8	angiopoietin-like 8	-2.9616327847092188	4.007350621287695e-5
103	ENSRNOG00000009528	Sdcbp2	syndecan binding protein 2	-2.949290461468044	3.271586682326462e-24
104	ENSRNOG00000020552	Fosl1	FOS like 1, AP-1 transcription factor subunit	-2.93609366974767	0.030003286080705266
105	ENSRNOG00000001979	Rcan1	regulator of calcineurin 1	-2.9293943632026833	3.530076396329471e-29
106	ENSRNOG00000047697	Ggt1	gamma-glutamyltransferase 1	-2.908184542829905	1.400550108451424e-11
107	ENSRNOG00000047647	Il2ra	interleukin 2 receptor subunit alpha	-2.9030502681189008	9.008024472038997e-11
108	ENSRNOG00000008048	Plscr1	phospholipid scramblase 1	-2.8949859321406266	7.135722876783546e-6
109	ENSRNOG00000039323	Dgkk	diacylglycerol kinase kappa	-2.8920415030524436	0.004450615748191167
110	ENSRNOG00000013829	Chrna3	cholinergic receptor nicotinic alpha 3 subunit	-2.8910456571201575	0.011292148352510802
111	ENSRNOG00000006104	Tg	thyroglobulin	-2.8909739626402087	6.7745756412608516e-9
112	ENSRNOG00000050123	Gdf5	growth differentiation factor 5	-2.8852138598759014	0.04207525231006108
113	ENSRNOG00000031662	Slc6a5	solute carrier family 6 member 5	-2.8746600636564703	1.7376596087558817e-5
114	ENSRNOG00000054957	Sfrp4	secreted frizzled-related protein 4	-2.87447497921697	1.4526646938203831e-13
115	ENSRNOG00000000590	Naglt1	Na+ dependent glucose transporter 1	-2.86813907448191	2.1378197182134445e-6
116	ENSRNOG00000070702	Smkr1	small lysine-rich protein 1	-2.8670727004926944	5.69078626549375e-6
117	ENSRNOG00000027873	RT1-M1-4	RT1 class I, locus M1, gene 4	-2.8519846106900277	0.006382478403991857
118	ENSRNOG00000032669	Serpina1	serpin family A member 1	-2.8493539164391155	1.9557553827705005e-4
119	ENSRNOG00000062998	Lcn15l1	lipocalin-15 like 1	-2.8459720021036676	0.0014914233471039124
120	ENSRNOG00000001911	Map6d1	MAP6 domain containing 1	-2.8439479512544823	5.496045293720304e-11
121	ENSRNOG00000004703	Muc15	mucin 15, cell surface associated	-2.8398035501567764	0.015554162168559633
122	ENSRNOG00000013713	LOC499240	similar to predicted gene ICRFP703B1614Q5.5	-2.828837716776197	0.011356911742481502
123	ENSRNOG00000017987	Ucma	upper zone of growth plate and cartilage matrix associated	-2.807013016547081	0.004530681171259686
124	MSTRG.13181	MSTRG.13181	-	-2.806344664875727	0.001128264044360247
125	ENSRNOG00000006037	Snap25	synaptosome associated protein 25	-2.8044003006261256	2.176702959684702e-6
126	ENSRNOG00000020873	Nphs1	NPHS1 adhesion molecule, nephrin	-2.7988968844435558	1.32919531099338e-4
127	ENSRNOG00000055221	Acot1	acyl-CoA thioesterase 1	-2.798887723830401	4.5215586407326707e-10
128	ENSRNOG00000021140	Kcnk4	potassium two pore domain channel subfamily K member 4	-2.7939317552762133	1.4714092678716175e-7
129	ENSRNOG00000002826	Hsd17b7	hydroxysteroid (17-beta) dehydrogenase 7	-2.7884819025581606	0.002122688853145924
130	MSTRG.15404	MSTRG.15404	-	-2.7882694045338376	5.5688041189720606e-5
131	ENSRNOG00000028812	Trim80	tripartite motif protein 80	-2.78632396974007	0.02995747900356041
132	ENSRNOG00000069144	ENSRNOG00000069144	-	-2.783182194129556	1.4253496503445945e-4
133	ENSRNOG00000023993	Kif1a	kinesin family member 1A	-2.7821232025675786	1.8414784360893086e-21
134	ENSRNOG00000056001	Sftpd	surfactant protein D	-2.773116014698734	1.149158942975788e-5
135	ENSRNOG00000015992	Ccl20	C-C motif chemokine ligand 20	-2.768516080612291	0.027494748571048538
136	ENSRNOG00000067909	ENSRNOG00000067909	-	-2.7647181680969815	0.034695246385481354
137	ENSRNOG00000006025	Lamb3	laminin subunit beta 3	-2.757582911744435	6.274931188142343e-6
138	ENSRNOG00000068266	Nxpe5	neurexophilin and PC-esterase domain family, member 5	-2.7571283330363014	5.007902276061642e-8
139	ENSRNOG00000016977	Calb2	calbindin 2	-2.746509950588757	6.013804690415455e-14
140	ENSRNOG00000005619	Misp3	MISP family member 3	-2.7352993914735464	2.959092527432484e-4
141	MSTRG.15606	MSTRG.15606	-	-2.7344510608740373	2.0309115670353124e-8
142	ENSRNOG00000068046	H3c13	H3 clustered histone 13	-2.7322684099361996	1.6282615961235862e-8
143	ENSRNOG00000008539	Lgals2	galectin 2	-2.7043464831203083	0.002194137281654903
144	ENSRNOG00000014771	Wfdc8	WAP four-disulfide core domain 8	-2.7013685308528315	5.414312222109252e-6
145	ENSRNOG00000056815	LOC120098380	small nucleolar RNA SNORA17	-2.6976682407950494	0.003618315514528867
146	ENSRNOG00000037753	Slc10a2	solute carrier family 10 member 2	-2.694941388551664	6.138377658790838e-5
147	ENSRNOG00000006761	Sh3gl2	SH3 domain containing GRB2 like 2, endophilin A1	-2.6769535372169635	4.4254666990776656e-10
148	ENSRNOG00000046377	Btnl9	butyrophilin-like 9	-2.6712603929495438	5.323846127463122e-7
149	ENSRNOG00000029844	Akr1c2	aldo-keto reductase family 1, member C2	-2.655153204359766	1.415111388421353e-6
150	ENSRNOG00000018748	Slc16a11	solute carrier family 16, member 11	-2.6425270825125744	6.9963664055250515e-12
151	ENSRNOG00000045797	Lep	leptin	-2.642217040085913	0.012511071982931063
152	ENSRNOG00000049976	Gzmc	granzyme C	-2.6400746734774687	7.660177965897455e-9
153	ENSRNOG00000008000	Syt13	synaptotagmin 13	-2.629210638084374	7.971357666624724e-14
154	ENSRNOG00000069426	ENSRNOG00000069426	-	-2.626369770246167	0.0038564402405672684
155	ENSRNOG00000070263	Rn5-8s	5.8S ribosomal RNA	-2.6165120132633484	0.003028342512282266
156	ENSRNOG00000019412	Rhbg	Rh family B glycoprotein	-2.6142848986142004	4.805404449943225e-21
157	ENSRNOG00000018603	Carns1	carnosine synthase 1	-2.610419282465694	0.0014264478897406145
158	ENSRNOG00000010833	Mthfd2	methylenetetrahydrofolate dehydrogenase (NADP+ dependent) 2, methenyltetrahydrofolate cyclohydrolase	-2.6050895529086575	2.8064983715459464e-24
159	ENSRNOG00000032745	Slc17a3	solute carrier family 17 member 3	-2.599671526903337	6.483976794318613e-8
160	ENSRNOG00000007319	Trib3	tribbles pseudokinase 3	-2.595351240783979	4.1527489163953026e-10
161	ENSRNOG00000015088	Prune2	prune homolog 2 with BCH domain	-2.5930412204332107	2.2229015750706367e-14
162	ENSRNOG00000014721	Ahrr	aryl-hydrocarbon receptor repressor	-2.582828190598612	6.056160934255559e-12
163	ENSRNOG00000039504	LOC360919	similar to alpha-fetoprotein	-2.5770476436241796	0.03183040179376291
164	ENSRNOG00000047307	Cntfr	ciliary neurotrophic factor receptor	-2.575791584762669	0.024683676958503518
165	ENSRNOG00000030091	Dusp14	dual specificity phosphatase 14	-2.5734180728759593	2.0666850287868127e-9
166	ENSRNOG00000071113	ENSRNOG00000071113	-	-2.568175950624858	8.147287260962421e-8
167	ENSRNOG00000007900	Tspan33	tetraspanin 33	-2.5611015192153337	3.11750464266897e-16
168	ENSRNOG00000065846	ENSRNOG00000065846	-	-2.560403566615449	3.768909665059859e-9
169	ENSRNOG00000024181	Tpsab1	tryptase alpha/beta 1	-2.560400845509551	0.01174915042993308
170	ENSRNOG00000002436	Mmd	monocyte to macrophage differentiation-associated	-2.5567449108218683	0.015950044567005828
171	ENSRNOG00000068539	ENSRNOG00000068539	-	-2.5554338648911545	6.148273983677672e-6
172	ENSRNOG00000063912	LOC690319	similar to Alpha-1-antitrypsin-related protein precursor	-2.553464080147175	0.024260335844680677
173	ENSRNOG00000000906	Medag	mesenteric estrogen-dependent adipogenesis	-2.5490600234785665	1.984101785349174e-11
174	ENSRNOG00000064568	ENSRNOG00000064568	-	-2.5488939056175	7.610708925053994e-10
175	ENSRNOG00000031448	Stpg1	sperm-tail PG-rich repeat containing 1	-2.5370734850881096	2.3277987126313858e-4
176	ENSRNOG00000018954	Tsnaxip1	translin-associated factor X interacting protein 1	-2.526603821464405	0.028788242025286584
177	ENSRNOG00000059947	Sdc1	syndecan 1	-2.5220768259948456	4.057515347728347e-13
178	ENSRNOG00000015052	Star	steroidogenic acute regulatory protein	-2.516303623673653	1.6616248530648904e-13
179	ENSRNOG00000001869	Rab44	RAB44, member RAS oncogene family	-2.5143558728440287	4.64865337759185e-12
180	ENSRNOG00000018257	Hpx	hemopexin	-2.504885028469961	1.1258786983275796e-4
181	ENSRNOG00000069051	ENSRNOG00000069051	-	-2.5034865413524496	6.44317764952559e-4
182	ENSRNOG00000002783	Serpinc1	serpin family C member 1	-2.501046218832255	0.005897289663995753
183	ENSRNOG00000018355	Msx2	msh homeobox 2	-2.4935501876824495	0.031153859929199904
184	ENSRNOG00000047746	ENSRNOG00000047746	-	-2.479091451975211	2.8941062437512767e-9
185	ENSRNOG00000014948	Osgin1	oxidative stress induced growth inhibitor 1	-2.4782772878426655	7.636672954166845e-10
186	ENSRNOG00000015449	Tmem171	transmembrane protein 171	-2.473542772648503	8.663734365930936e-5
187	ENSRNOG00000069402	ENSRNOG00000069402	-	-2.471390700240863	1.897880232846196e-5
188	MSTRG.12916	MSTRG.12916	-	-2.458868321571663	4.013270894997473e-5
189	ENSRNOG00000017531	Akr1c3	aldo-keto reductase family 1, member C3	-2.4526515495766508	4.55837154857616e-8
190	ENSRNOG00000018694	Lipg	lipase G, endothelial type	-2.4523480214404625	1.1496642266645838e-12
191	ENSRNOG00000069024	ENSRNOG00000069024	-	-2.4519984038719227	2.2798225100410494e-14
192	ENSRNOG00000065352	H2ac1	H2A clustered histone 1	-2.451860920838445	0.0017867593754116906
193	ENSRNOG00000064699	ENSRNOG00000064699	-	-2.447164539556885	1.4994210941176916e-10
194	ENSRNOG00000071128	B3gnt4	UDP-GlcNAc:betaGal beta-1,3-N-acetylglucosaminyltransferase 4	-2.4463119722961224	8.686300293173069e-8
195	ENSRNOG00000032085	Dlec1	DLEC1 cilia and flagella associated protein	-2.444009667534188	7.646665103686229e-4
196	ENSRNOG00000032922	Dclk1	doublecortin-like kinase 1	-2.4428546270504135	3.474567919492015e-4
197	ENSRNOG00000070513	Hist1h2ao	histone cluster 1, H2ao	-2.4401110043615377	0.003860631614453666
198	ENSRNOG00000069096	ENSRNOG00000069096	-	-2.4274341162876047	0.014362545886349694
199	ENSRNOG00000058329	Prrx2	paired related homeobox 2	-2.4245715430141215	3.834359998163175e-14
200	ENSRNOG00000004459	Sdr9c7	short chain dehydrogenase/reductase family 9C, member 7	-2.423133706850437	4.6014179844423225e-7
201	ENSRNOG00000027839	Ptk2b	protein tyrosine kinase 2 beta	-2.41669077754557	1.951068445410312e-12
202	ENSRNOG00000054495	Cldn2	claudin 2	-2.4162552327019	3.3413577687288114e-7
203	ENSRNOG00000008966	Slco5a1	solute carrier organic anion transporter family, member 5A1	-2.4160127269991896	1.2307086205312906e-17
204	ENSRNOG00000001374	Rasal1	RAS protein activator like 1	-2.409218538191472	2.0045454419774016e-10
205	ENSRNOG00000014083	Iqsec3	IQ motif and Sec7 domain ArfGEF 3	-2.405065226950856	0.007037216314041975
206	ENSRNOG00000054801	ENSRNOG00000054801	-	-2.4012693929852675	0.00960305133179684
207	ENSRNOG00000014828	Avpi1	arginine vasopressin-induced 1	-2.395615559403717	2.774786649935032e-20
208	ENSRNOG00000058645	Tnc	tenascin C	-2.3922862824673277	1.9262854425596222e-8
209	ENSRNOG00000037668	Ccdc162	coiled-coil domain containing 162	-2.3904976308506405	3.663932648074133e-7
210	ENSRNOG00000019296	Gnat2	G protein subunit alpha transducin 2	-2.3894629908636595	4.070888774514669e-5
211	ENSRNOG00000019183	Alox15	arachidonate 15-lipoxygenase	-2.3869556864552166	4.564198812308076e-9
212	ENSRNOG00000013981	Ptpn5	protein tyrosine phosphatase, non-receptor type 5	-2.3802781025682944	3.421555171918178e-26
213	ENSRNOG00000008716	Nefh	neurofilament heavy chain	-2.3776545529510655	1.8988568511413837e-8
214	ENSRNOG00000012123	Fdx1	ferredoxin 1	-2.3768301884120304	1.6143126564492054e-23
215	ENSRNOG00000014692	Mogat1	monoacylglycerol O-acyltransferase 1	-2.369998185703358	2.5111633355501927e-6
216	ENSRNOG00000071023	Zfp347	zinc finger protein 347	-2.3669607399963097	3.210330266293104e-9
217	ENSRNOG00000021269	Chgb	chromogranin B	-2.3608937025169197	1.6111291299335202e-4
218	ENSRNOG00000020525	Col5a3	collagen type V alpha 3 chain	-2.348119487875256	3.114166842607148e-10
219	ENSRNOG00000015259	Pth2r	parathyroid hormone 2 receptor	-2.3475926570127044	0.005213407833539168
220	ENSRNOG00000021812	Scx	scleraxis bHLH transcription factor	-2.3475396084064095	7.306878432072314e-10
221	ENSRNOG00000016479	Plekhg4	pleckstrin homology and RhoGEF domain containing G4	-2.3429524216957223	0.006506364548850465
222	ENSRNOG00000010208	Timp1	TIMP metallopeptidase inhibitor 1	-2.340670530305374	3.268135446104912e-4
223	ENSRNOG00000000981	Scarb1	scavenger receptor class B, member 1	-2.3395096766341354	2.7176045755271334e-13
224	ENSRNOG00000013932	Rbp2	retinol binding protein 2	-2.3352951524730985	3.091870975337194e-5
225	ENSRNOG00000003546	Tnfrsf12a	TNF receptor superfamily member 12A	-2.3283695378264313	1.7839496618581992e-11
226	ENSRNOG00000028470	Gdpd4	glycerophosphodiester phosphodiesterase domain containing 4	-2.3204136898964958	0.020678638212688057
227	ENSRNOG00000047258	Prss55	serine protease 55	-2.318323688172394	0.0014132600707027893
228	ENSRNOG00000017833	Actn2	actinin alpha 2	-2.3131023453204724	0.004563797155174558
229	ENSRNOG00000021524	Mrap	melanocortin 2 receptor accessory protein	-2.3108485327129418	7.640632849683624e-17
230	ENSRNOG00000055672	Gpx2	glutathione peroxidase 2	-2.3083094204045156	0.017531958844242617
231	ENSRNOG00000011141	Serpina11	serpin family A member 11	-2.3070578526337724	2.768960765058306e-6
232	ENSRNOG00000005871	Il1rn	interleukin 1 receptor antagonist	-2.30548418749955	1.2200854056299728e-5
233	ENSRNOG00000051563	Giot1	gonadotropin inducible ovarian transcription factor 1	-2.3033299293177163	4.959055295605098e-12
234	ENSRNOG00000013698	RGD1566387	similar to hypothetical protein	-2.2978533588583816	0.007111499202877296
235	ENSRNOG00000026344	Togaram2	TOG array regulator of axonemal microtubules 2	-2.296301602425015	3.309967939508561e-5
236	ENSRNOG00000019170	Il27	interleukin 27	-2.293886511672768	4.6720365418426234e-4
237	ENSRNOG00000012562	Grin3b	glutamate ionotropic receptor NMDA type subunit 3B	-2.290836424916732	0.023120361973591283
238	ENSRNOG00000021586	Gpr39	G protein-coupled receptor 39	-2.2881947973122236	0.0012509490650671185
239	ENSRNOG00000049495	Krt71	keratin 71	-2.2879007692358777	1.5757614934562233e-5
240	ENSRNOG00000068399	Itgad	integrin subunit alpha D	-2.28197237915448	4.297716106801191e-5
241	MSTRG.17027	MSTRG.17027	-	-2.281142077517498	5.022814403450316e-5
242	ENSRNOG00000015562	Cdh17	cadherin 17	-2.2786949282459332	2.8941062437512767e-9
243	ENSRNOG00000002024	Epha5	EPH receptor A5	-2.27206196170849	2.962523247932008e-7
244	ENSRNOG00000014964	Hp	haptoglobin	-2.268080912346547	0.004399818767501199
245	ENSRNOG00000008074	Cyp11a1	cytochrome P450, family 11, subfamily a, polypeptide 1	-2.2655882833525607	1.921890331423237e-18
246	ENSRNOG00000011351	Mat1a	methionine adenosyltransferase 1A	-2.2621578628859487	1.3767378970630116e-4
247	ENSRNOG00000011284	Sgms2	sphingomyelin synthase 2	-2.2515390634744072	2.802948710926931e-9
248	ENSRNOG00000020879	Nags	N-acetylglutamate synthase	-2.2484118605771424	1.2796757030341035e-5
249	ENSRNOG00000000563	Adamts14	ADAM metallopeptidase with thrombospondin type 1 motif, 14	-2.248026411841965	4.3723440503262643e-7
250	ENSRNOG00000047459	H1f4	H1.4 linker histone, cluster member	-2.2458661475419595	6.631153259057784e-6
251	ENSRNOG00000024688	Erfe	erythroferrone	-2.2454158114417497	0.004466554388300398
252	ENSRNOG00000006950	Padi3	peptidyl arginine deiminase 3	-2.244334398645285	1.0392717213774505e-6
253	ENSRNOG00000021447	Prr7	proline rich 7 (synaptic)	-2.242023358495443	2.5417637403100047e-51
254	ENSRNOG00000002771	Ereg	epiregulin	-2.239147616216398	0.022727924026008536
255	ENSRNOG00000023895	Ube2u	ubiquitin conjugating enzyme E2 U	-2.237184485533463	0.0019249511886847389
256	ENSRNOG00000033763	RGD1307537	similar to RIKEN cDNA 4933417A18	-2.2337411747725073	0.021986021079406014
257	ENSRNOG00000020193	Runx2	RUNX family transcription factor 2	-2.233246183251613	8.108545246703745e-9
258	ENSRNOG00000051306	ENSRNOG00000051306	-	-2.2303396546167806	6.031995754947276e-8
259	ENSRNOG00000000904	Wdr95	WD40 repeat domain 95	-2.229644507231938	0.0029210976950910716
260	ENSRNOG00000070827	ENSRNOG00000070827	-	-2.2280670836672147	0.0010254929449477635
261	ENSRNOG00000038331	Akr1c1	aldo-keto reductase family 1, member C1	-2.225834153673489	2.7637825367643324e-4
262	ENSRNOG00000070111	Apol2	apolipoprotein L, 2	-2.220797922962145	8.030054312616614e-5
263	ENSRNOG00000068910	Olr157	olfactory receptor 157	-2.2196868312745632	0.0022035128873802295
264	ENSRNOG00000069674	ENSRNOG00000069674	-	-2.2192436567725977	2.2158937863148758e-8
265	ENSRNOG00000015082	Nlrp10	NLR family, pyrin domain containing 10	-2.218216486767419	4.349355430938065e-8
266	ENSRNOG00000053239	Clmp	CXADR-like membrane protein	-2.2084040973161403	4.595891596207039e-7
267	ENSRNOG00000006778	Mmp19	matrix metallopeptidase 19	-2.2071076604321163	1.894176147046179e-11
268	ENSRNOG00000042960	Rgcc	regulator of cell cycle	-2.2029114819518987	1.3643976567928815e-7
269	ENSRNOG00000007060	Plin2	perilipin 2	-2.2027979940490634	8.19408026364723e-9
270	ENSRNOG00000060141	Epdr1	ependymin related 1	-2.200050602632485	5.272139238774043e-13
271	ENSRNOG00000046468	Ptgfr	prostaglandin F receptor	-2.183995218535196	1.1775782682121601e-11
272	ENSRNOG00000031391	Ceacam16	CEA cell adhesion molecule 16, tectorial membrane component	-2.181553859135741	0.03163890178854833
273	ENSRNOG00000001706	Kalrn	kalirin, RhoGEF kinase	-2.17688537743436	1.5412668846773924e-23
274	ENSRNOG00000053397	Fmr1nb	FMR1 neighbor	-2.165391780043916	0.013567728027169776
275	ENSRNOG00000062500	ENSRNOG00000062500	-	-2.1632421176353027	0.021261850775525573
276	ENSRNOG00000067363	Xkrx	XK related, X-linked	-2.1613322116035727	0.0020088557216750244
277	ENSRNOG00000047573	Ttc39a	tetratricopeptide repeat domain 39A	-2.1589769841462845	2.924401275375746e-5
278	ENSRNOG00000034075	Ube2ql1	ubiquitin-conjugating enzyme E2Q family-like 1	-2.151459219225843	1.7112396482351603e-19
279	ENSRNOG00000010312	Bhlhe23	basic helix-loop-helix family, member e23	-2.14110918295597	0.023616530100320266
280	ENSRNOG00000004341	LOC498222	similar to specifically androgen-regulated protein	-2.1326687505674857	4.858084317333163e-9
281	ENSRNOG00000054013	Clec4g	C-type lectin domain family 4, member G	-2.132592747549339	0.03846048875235754
282	ENSRNOG00000004125	C4bpb	complement component 4 binding protein, beta	-2.129614344654712	0.0017243072452509502
283	ENSRNOG00000007270	Il12rb2	interleukin 12 receptor subunit beta 2	-2.128842005610769	0.002894050260500466
284	ENSRNOG00000010805	Fabp4	fatty acid binding protein 4	-2.1207381443693385	0.020649158628258824
285	ENSRNOG00000011984	Cxcl14	C-X-C motif chemokine ligand 14	-2.11871653398922	0.01346200371558457
286	ENSRNOG00000025117	Noxo1	NADPH oxidase organizer 1	-2.1165677080427194	0.037221381428265116
287	ENSRNOG00000001092	Kl	Klotho	-2.100755360988376	0.02078260728078047
288	ENSRNOG00000064803	ENSRNOG00000064803	-	-2.0980260514959737	8.511691493777783e-5
289	ENSRNOG00000046864	Acot4	acyl-CoA thioesterase 4	-2.097084201653622	2.7439065907954498e-5
290	ENSRNOG00000018384	Adam12	ADAM metallopeptidase domain 12	-2.091905532070059	1.5784188232687102e-8
291	ENSRNOG00000030291	ENSRNOG00000030291	-	-2.0906545026441368	0.007606041764714157
292	ENSRNOG00000006735	Cdkn2b	cyclin-dependent kinase inhibitor 2B	-2.0866472670001674	1.0621804744896148e-6
293	ENSRNOG00000003716	Batf3	basic leucine zipper ATF-like transcription factor 3	-2.085342551159872	0.01570851193356654
294	ENSRNOG00000006575	Ccdc96	coiled-coil domain containing 96	-2.084052688276193	8.414321342720307e-5
295	ENSRNOG00000050445	Gde1	glycerophosphodiester phosphodiesterase 1	-2.079524392603209	1.7004216100327425e-24
296	ENSRNOG00000049349	Tafa5	TAFA chemokine like family member 5	-2.0773091831198163	2.3740085565469265e-7
297	ENSRNOG00000000245	Slc16a6	solute carrier family 16, member 6	-2.07627579835548	5.250349040103251e-21
298	ENSRNOG00000033503	Ldlrad2	low density lipoprotein receptor class A domain containing 2	-2.0731243959662486	4.056122688353914e-6
299	ENSRNOG00000003969	Fam20a	FAM20A, golgi associated secretory pathway pseudokinase	-2.0727437857496223	8.269301282895364e-10
300	ENSRNOG00000023896	Dusp6	dual specificity phosphatase 6	-2.061507897248999	0.003924622794812441
301	ENSRNOG00000011011	Nmb	neuromedin B	-2.0611087987940206	1.4188058095401807e-6
302	ENSRNOG00000068121	ENSRNOG00000068121	-	-2.058732348652492	0.0020639460996558475
303	ENSRNOG00000001943	Retnlg	resistin-like gamma	-2.056719535473403	3.32659789697502e-4
304	ENSRNOG00000027593	Ndufv3-ps1	NADH dehydrogenase (ubiquinone) flavoprotein 3, pseudogene 1	-2.0555607832122624	0.037859138901090425
305	ENSRNOG00000000521	Cdkn1a	cyclin-dependent kinase inhibitor 1A	-2.0499718153678024	5.644574083433384e-4
306	ENSRNOG00000046566	Tub	TUB bipartite transcription factor	-2.049088344044891	8.383037312021504e-11
307	ENSRNOG00000042309	Kiaa0408L	Kiaa0408-like	-2.043954051137865	9.385190362224984e-18
308	ENSRNOG00000011039	Gch1	GTP cyclohydrolase 1	-2.042643319735054	3.114166842607148e-10
309	ENSRNOG00000011944	Snx10	sorting nexin 10	-2.042546631150379	5.907621802343591e-10
310	ENSRNOG00000012847	Scgb1c1	secretoglobin, family 1C, member 1	-2.04240892330521	0.001990098466538949
311	ENSRNOG00000026592	Rhbdl2	rhomboid like 2	-2.0401399716165454	6.5543623680686115e-12
312	ENSRNOG00000007461	Klhl41	kelch-like family member 41	-2.036619383406643	6.501195086183204e-6
313	ENSRNOG00000009031	Gucy2c	guanylate cyclase 2C	-2.034028224807934	1.2226445464953046e-5
314	ENSRNOG00000047848	ENSRNOG00000047848	-	-2.0317665883323155	1.8457787316430628e-7
315	ENSRNOG00000006783	Neb	nebulin	-2.028899899238901	3.926138648021044e-6
316	ENSRNOG00000018427	Lhx3	LIM homeobox 3	-2.027888766066348	0.04265387642221384
317	ENSRNOG00000014427	Chrnb4	cholinergic receptor nicotinic beta 4 subunit	-2.0276273135828795	0.006232087255715741
318	ENSRNOG00000039865	Vnn3	vanin 3	-2.0250554418549824	1.1079528733983098e-10
319	ENSRNOG00000004564	Lrriq1	leucine-rich repeats and IQ motif containing 1	-2.0172830725836683	0.02015537126549349
320	ENSRNOG00000018950	Fa2h	fatty acid 2-hydroxylase	-2.0148803438050877	0.02980311857313649
321	ENSRNOG00000003998	Sgca	sarcoglycan, alpha	-2.0115840498533473	0.0026803602610430965
322	ENSRNOG00000010076	Pkp1	plakophilin 1	-2.010626901034579	0.01433350306001969
323	ENSRNOG00000009700	Dync1i1	dynein cytoplasmic 1 intermediate chain 1	-2.008674797792531	0.0019165582745328828
324	ENSRNOG00000065867	ENSRNOG00000065867	-	-2.007657974263588	0.0016637458410856869
325	ENSRNOG00000011028	Cfap61	cilia and flagella associated protein 61	-2.00565339544136	0.04125068992851367
326	ENSRNOG00000070677	Pilrb	paired immunoglobin-like type 2 receptor beta	-1.9986905621911963	4.063224880847139e-4
327	ENSRNOG00000027463	Adamts3	ADAM metallopeptidase with thrombospondin type 1, motif 3	-1.9965053316501657	2.490820415039136e-10
328	ENSRNOG00000019208	P2rx5	purinergic receptor P2X 5	-1.9925468120975591	1.4455089454892975e-7
329	ENSRNOG00000016550	Dclk2	doublecortin-like kinase 2	-1.9915292398580693	1.4272297527355582e-7
330	ENSRNOG00000029740	Slc35g1	solute carrier family 35, member G1	-1.9909192300868364	9.435389794624169e-8
331	ENSRNOG00000016690	Idi1	isopentenyl-diphosphate delta isomerase 1	-1.9882951403848041	0.001111257598280091
332	ENSRNOG00000067280	LOC100911489	uncharacterized LOC100911489	-1.987935215823812	0.0022358319106034036
333	ENSRNOG00000061238	Wnt10b	Wnt family member 10B	-1.9867344346361508	5.3602637364577585e-6
334	ENSRNOG00000033761	Vegp2	von Ebners gland protein 2	-1.9824848664705623	0.03448372487932195
335	ENSRNOG00000009881	Fam161a	FAM161 centrosomal protein A	-1.9769692294554713	5.210342480702774e-4
336	ENSRNOG00000048114	Echdc3	enoyl CoA hydratase domain containing 3	-1.9767755020934683	4.444312337773424e-16
337	ENSRNOG00000005615	Gadd45a	growth arrest and DNA-damage-inducible, alpha	-1.9725509012815028	1.29082414372283e-6
338	ENSRNOG00000014387	Chac1	ChaC glutathione-specific gamma-glutamylcyclotransferase 1	-1.9683546682818773	0.0028981016321611105
339	ENSRNOG00000054420	Vdr	vitamin D receptor	-1.9642944310349626	4.96381172067309e-6
340	ENSRNOG00000006116	Hk2	hexokinase 2	-1.9641820937823928	8.640507189860596e-11
341	ENSRNOG00000046848	PCOLCE2	procollagen C-endopeptidase enhancer 2	-1.959912288474852	4.2055027919108486e-7
342	ENSRNOG00000010819	Hspa4l	heat shock protein family A (Hsp70) member 4 like	-1.9511545582431602	1.2605385281412899e-14
343	ENSRNOG00000025164	Bhlha15	basic helix-loop-helix family, member a15	-1.949063473953465	0.019581950559210866
344	ENSRNOG00000032311	Ttll8	tubulin tyrosine ligase like 8	-1.9489511538152684	8.03649896011617e-4
345	ENSRNOG00000061910	Igfbp3	insulin-like growth factor binding protein 3	-1.9473730048317026	2.755449732140658e-5
346	ENSRNOG00000058434	Cfap99	cilia and flagella associated protein 99	-1.9472077275502537	0.04586171953013671
347	ENSRNOG00000065697	LOC102554935	uncharacterized LOC102554935	-1.9466555981986287	6.281676573988351e-4
348	ENSRNOG00000011557	S100a8	S100 calcium binding protein A8	-1.9452267863078818	0.00479648958135828
349	ENSRNOG00000002142	Cds1	CDP-diacylglycerol synthase 1	-1.9430317457736905	6.914365680574324e-8
350	ENSRNOG00000034139	Lyc2	lysozyme C type 2	-1.9411596972200267	0.006930607990323289
351	ENSRNOG00000006926	Atp6v0d2	ATPase H+ transporting V0 subunit D2	-1.9394194094152148	2.0817677595278686e-6
352	ENSRNOG00000008169	Slc24a2	solute carrier family 24 member 2	-1.9379026621954605	0.02239002958374663
353	ENSRNOG00000012665	Nmrk1	nicotinamide riboside kinase 1	-1.932669015612348	1.5259379597452682e-11
354	ENSRNOG00000022937	Bpifc	BPI fold containing family C	-1.9292945562800052	2.5865672638016433e-6
355	ENSRNOG00000065735	Dhrs9	dehydrogenase/reductase 9	-1.929187490687605	1.1187757534445186e-4
356	ENSRNOG00000048819	Rnf11l2	ring finger protein 11-like 2	-1.9288960891028417	0.026596018105718985
357	ENSRNOG00000020837	Cd300lg	Cd300 molecule-like family member G	-1.9269632055854713	2.0817677595278686e-6
358	ENSRNOG00000002289	Ildr1	immunoglobulin-like domain containing receptor 1	-1.9266799201492968	4.3723440503262643e-7
359	ENSRNOG00000066075	ENSRNOG00000066075	-	-1.9245385101489305	8.439548238291955e-4
360	ENSRNOG00000004778	Cnga1	cyclic nucleotide gated channel subunit alpha 1	-1.924053434377362	0.0020308662048565663
361	ENSRNOG00000027350	Tns4	tensin 4	-1.914878699273284	1.1026102757969417e-7
362	ENSRNOG00000004699	Fibin	fin bud initiation factor homolog	-1.9112156819136064	3.313714231693027e-5
363	ENSRNOG00000026036	Pdyn	prodynorphin	-1.9109744818456074	4.2845044048300714e-17
364	ENSRNOG00000070155	LOC102548446	uncharacterized LOC102548446	-1.9095405633590476	0.0052280731161487015
365	ENSRNOG00000016776	Extl1	exostosin-like glycosyltransferase 1	-1.9058420458080907	1.9560262136263877e-12
366	ENSRNOG00000013521	Dhfr	dihydrofolate reductase	-1.9056552028118532	1.6720287160237798e-8
367	ENSRNOG00000000036	Klhdc8a	kelch domain containing 8A	-1.9028075125487685	2.6144781600472314e-11
368	ENSRNOG00000001159	Tff3	trefoil factor 3	-1.8943363822057437	2.173049745770828e-4
369	ENSRNOG00000008766	Grin2b	glutamate ionotropic receptor NMDA type subunit 2B	-1.8919882011501639	2.1731932570488364e-5
370	ENSRNOG00000017175	H1f1	H1.1 linker histone, cluster member	-1.8910614871073468	0.019379476486306956
371	ENSRNOG00000015279	Vtcn1	V-set domain containing T cell activation inhibitor 1	-1.8888964274830433	0.003237642488528801
372	ENSRNOG00000012151	Itpripl1	ITPRIP like 1	-1.8859053340102878	6.973765538280869e-13
373	ENSRNOG00000005971	Gpr176	G protein-coupled receptor 176	-1.878860890114318	3.815114000081063e-8
374	ENSRNOG00000003232	Slc9a3r1	SLC9A3 regulator 1	-1.877778550046497	7.034614727175613e-15
375	ENSRNOG00000005861	Hsd11b1	hydroxysteroid 11-beta dehydrogenase 1	-1.8744058007733615	1.0114815657468469e-5
376	ENSRNOG00000003952	Map3k19	mitogen-activated protein kinase kinase kinase 19	-1.8703234436406546	0.005255902984746606
377	ENSRNOG00000012324	Soga3	SOGA family member 3	-1.8701827865128224	3.7104039608174917e-13
378	ENSRNOG00000015148	Erc2	ELKS/RAB6-interacting/CAST family member 2	-1.8676797642521419	4.8288124314658417e-5
379	ENSRNOG00000063437	LOC102551819	U3 small nucleolar RNA-associated protein 14 homolog B-like	-1.8647584108450166	8.492103931438481e-10
380	ENSRNOG00000007544	Il23r	interleukin 23 receptor	-1.8640499645761766	2.8856201457357635e-5
381	ENSRNOG00000053766	Ramp3	receptor activity modifying protein 3	-1.8639359658064563	2.4390595720200013e-4
382	ENSRNOG00000002701	Hgd	homogentisate 1, 2-dioxygenase	-1.8614118614992177	0.02345582469335869
383	ENSRNOG00000015020	Idh1	isocitrate dehydrogenase (NADP(+)) 1	-1.860206829776132	7.718928328706215e-12
384	ENSRNOG00000032994	Myom3	myomesin 3	-1.8587742757892447	1.3327379478375391e-12
385	ENSRNOG00000069611	ENSRNOG00000069611	-	-1.8582774355494698	0.001398121398604221
386	ENSRNOG00000017159	Dsc3	desmocollin 3	-1.8566625977166493	0.015136168933789614
387	ENSRNOG00000006741	Podnl1	podocan-like 1	-1.855400289594802	1.2141574937331794e-5
388	ENSRNOG00000000184	Tmprss6	transmembrane serine protease 6	-1.8511592907381968	1.809023697397556e-9
389	ENSRNOG00000002754	Areg	amphiregulin	-1.8489948912017402	0.02382051553100451
390	ENSRNOG00000020685	Atp12a	ATPase H+/K+ transporting non-gastric alpha2 subunit	-1.8468386789776392	0.004420927583630216
391	ENSRNOG00000000825	Calhm5	calcium homeostasis modulator family member 5	-1.8423263428694614	1.288093142301503e-4
392	ENSRNOG00000015061	Igfals	insulin-like growth factor binding protein, acid labile subunit	-1.8414454347977978	0.00030300248923310463
393	ENSRNOG00000017434	Mgat3	beta-1,4-mannosyl-glycoprotein 4-beta-N-acetylglucosaminyltransferase	-1.8340033787370966	3.6958812872571642e-9
394	ENSRNOG00000068024	B3gnt8	UDP-GlcNAc:betaGal beta-1,3-N-acetylglucosaminyltransferase 8	-1.8294083574033022	1.009718348128046e-11
395	ENSRNOG00000006486	Reg1a	regenerating family member 1 alpha	-1.8292374185414364	0.007706286769431136
396	ENSRNOG00000064874	LOC120097921	ubiquitin carboxyl-terminal hydrolase 17-like protein D	-1.8286935243069389	0.0019887584138285155
397	ENSRNOG00000010161	Myo10	myosin X	-1.8267698072584577	3.44688386293055e-11
398	ENSRNOG00000070502	ENSRNOG00000070502	-	-1.8252840398757189	0.022709202290932894
399	ENSRNOG00000069318	LOC689437	similar to vitamin A-deficient testicular protein 11-like	-1.8241130941710677	0.026255220143577337
400	ENSRNOG00000046791	Sh3rf3	SH3 domain containing ring finger 3	-1.8178218807256323	7.490425908925924e-7
401	ENSRNOG00000013309	Pik3ap1	phosphoinositide-3-kinase adaptor protein 1	-1.8177966609142102	1.846393153831716e-11
402	ENSRNOG00000013851	Spry4	sprouty RTK signaling antagonist 4	-1.8177079801306153	3.704158555416286e-9
403	ENSRNOG00000045679	Apoa1	apolipoprotein A1	-1.817537339498116	2.5281614215972957e-4
404	ENSRNOG00000032297	Msmo1	methylsterol monooxygenase 1	-1.8168444054926234	0.0039003852336070973
405	ENSRNOG00000008713	Slc41a2	solute carrier family 41 member 2	-1.8124339439881583	1.7392273650036714e-10
406	ENSRNOG00000019959	Kcnc3	potassium voltage-gated channel subfamily C member 3	-1.8123000640851996	6.696472130503153e-6
407	ENSRNOG00000014718	Acsl3	acyl-CoA synthetase long-chain family member 3	-1.8108712303280468	3.7027000561271945e-7
408	MSTRG.7821	MSTRG.7821	-	-1.8105099209652156	1.2036996134556938e-5
409	ENSRNOG00000000640	Egr2	early growth response 2	-1.8091387039410027	0.010171731646856376
410	ENSRNOG00000013674	Megf10	multiple EGF-like domains 10	-1.8065681681880537	0.022636390877491055
411	ENSRNOG00000059540	Gcnt3	glucosaminyl (N-acetyl) transferase 3, mucin type	-1.8032706149772333	3.659004740413561e-8
412	ENSRNOG00000011668	Nfil3	nuclear factor, interleukin 3 regulated	-1.8026152268358235	1.2715896484155865e-8
413	ENSRNOG00000002408	Rbm47	RNA binding motif protein 47	-1.802292792161891	1.859224730092805e-12
414	ENSRNOG00000001765	Slc51a	solute carrier family 51 subunit alpha	-1.8014767926509128	0.00423454386217468
415	ENSRNOG00000019361	Inpp5j	inositol polyphosphate-5-phosphatase J	-1.8013851918115842	0.005539123762079021
416	ENSRNOG00000056550	Epb41l4b	erythrocyte membrane protein band 4.1 like 4B	-1.799706856992736	1.3440692108195597e-5
417	ENSRNOG00000014061	Dusp5	dual specificity phosphatase 5	-1.7995773897196377	0.02412083538547264
418	ENSRNOG00000009565	Pdk4	pyruvate dehydrogenase kinase 4	-1.79745432473939	1.2258315776464815e-8
419	ENSRNOG00000010958	Prdx3	peroxiredoxin 3	-1.7933064610096177	1.9457504259694148e-35
420	ENSRNOG00000019283	P2ry2	purinergic receptor P2Y2	-1.7909428372609966	2.3411094093101693e-13
421	ENSRNOG00000037476	Galnt9	polypeptide N-acetylgalactosaminyltransferase 9	-1.7905715934855884	1.5042862080749298e-4
422	ENSRNOG00000021125	Prdx5	peroxiredoxin 5	-1.788686932502225	2.204378993833277e-16
423	ENSRNOG00000005061	Dlst	dihydrolipoamide S-succinyltransferase	-1.7871327327986204	1.1940873648447424e-15
424	ENSRNOG00000031934	Enah	ENAH, actin regulator	-1.7838783807024217	3.223394755963148e-16
425	ENSRNOG00000011425	Ptpn3	protein tyrosine phosphatase, non-receptor type 3	-1.7831697845835592	4.716375726460763e-10
426	ENSRNOG00000050996	Kctd4	potassium channel tetramerization domain containing 4	-1.7797289132130951	0.026841687239627925
427	ENSRNOG00000050223	Rin1	Ras and Rab interactor 1	-1.779687608860816	3.460603569718175e-13
428	ENSRNOG00000000017	Steap1	STEAP family member 1	-1.775848484857075	7.416103279822716e-6
429	ENSRNOG00000049437	Gpc1	glypican 1	-1.7743332428342766	4.652039250521562e-36
430	ENSRNOG00000002525	Ptgs2	prostaglandin-endoperoxide synthase 2	-1.7742483656278611	0.0303435169836943
431	ENSRNOG00000011483	S100a9	S100 calcium binding protein A9	-1.7734014132212723	0.0010273129844050083
432	ENSRNOG00000054955	Adgra1	adhesion G protein-coupled receptor A1	-1.7699871644457046	0.035136645578968936
433	ENSRNOG00000018646	Hbegf	heparin-binding EGF-like growth factor	-1.7621272849872163	1.8878895754195284e-6
434	ENSRNOG00000021015	Sbsn	suprabasin	-1.7612333153937398	7.568658422580774e-6
435	ENSRNOG00000048152	Myo1b	myosin Ib	-1.7603290097447246	4.507298720209771e-11
436	ENSRNOG00000013834	Svs5	seminal vesicle secretory protein 5	-1.758951836866546	0.0016168969129969183
437	ENSRNOG00000054860	Clec12a	C-type lectin domain family 12, member A	-1.755206198295643	0.013273650712088803
438	ENSRNOG00000039856	Lrrc73	leucine rich repeat containing 73	-1.7542984191417557	0.0018874093985582483
439	ENSRNOG00000064680	Gpihbp1	glycosylphosphatidylinositol anchored high density lipoprotein binding protein 1	-1.7537564942191357	2.4002405804253026e-6
440	ENSRNOG00000062927	ENSRNOG00000062927	-	-1.7533294870066962	5.228189728583141e-4
441	ENSRNOG00000011846	Krt28	keratin 28	-1.7532905282289015	0.01045373105246873
442	ENSRNOG00000058497	Fdxr	ferredoxin reductase	-1.7532350679677546	5.2654553585566865e-22
443	ENSRNOG00000052665	Onecut2	one cut homeobox 2	-1.7494116240438855	1.8112780581349247e-9
444	ENSRNOG00000066981	ENSRNOG00000066981	-	-1.7432303536410017	0.0021675414225404105
445	ENSRNOG00000003984	Apln	apelin	-1.7407930290972655	1.585500159303477e-7
446	ENSRNOG00000027145	Rora	RAR-related orphan receptor A	-1.736795179704524	1.0035628214235692e-7
447	ENSRNOG00000064337	ENSRNOG00000064337	-	-1.7342767711028186	1.0511729537627425e-4
448	ENSRNOG00000034038	LOC100911413	deleted in malignant brain tumors 1 protein-like	-1.7340603288711227	3.29329801930799e-4
449	ENSRNOG00000007923	Cgref1	cell growth regulator with EF hand domain 1	-1.7316339548557844	7.68006817701246e-6
450	ENSRNOG00000016257	Cotl1	coactosin-like F-actin binding protein 1	-1.7306006924602557	4.2393900828399895e-7
451	ENSRNOG00000022691	St8sia5	ST8 alpha-N-acetyl-neuraminide alpha-2,8-sialyltransferase 5	-1.7303486056495057	3.6448699965626173e-8
452	ENSRNOG00000019147	Stom	stomatin	-1.724842271850305	1.1866857372398764e-7
453	ENSRNOG00000023257	Adamts9	ADAM metallopeptidase with thrombospondin type 1 motif, 9	-1.723855190021608	2.979733877850446e-11
454	ENSRNOG00000007765	Frzb	frizzled-related protein	-1.7216943375196694	1.1348568742788431e-4
455	ENSRNOG00000008822	Fkbp1a	FKBP prolyl isomerase 1A	-1.720384015398032	1.5759419829751824e-30
456	ENSRNOG00000049425	Fam167b	family with sequence similarity 167, member B	-1.7196001104153031	1.223130056171678e-7
457	ENSRNOG00000013610	Chrna5	cholinergic receptor nicotinic alpha 5 subunit	-1.7182714004752846	3.4045428433573697e-5
458	ENSRNOG00000023721	LOC502684	hypothetical protein LOC502684	-1.7166663641212807	2.0959200622775056e-6
459	ENSRNOG00000043143	Eml1	EMAP like 1	-1.7150611289243036	0.027732109713872674
460	ENSRNOG00000059445	Aifm2	apoptosis inducing factor, mitochondria associated 2	-1.7109449853314456	1.3774190727552471e-10
461	ENSRNOG00000059890	Clec2d2	C-type lectin domain family 2 member D2	-1.7090763968769807	2.5298597910410583e-6
462	ENSRNOG00000004589	Galnt16	polypeptide N-acetylgalactosaminyltransferase 16	-1.7081722089341926	6.982697794902509e-8
463	ENSRNOG00000069245	LOC120097726	histone H2A type 1-F	-1.7081673264562356	0.004013948609861024
464	ENSRNOG00000017512	Aldh3b1	aldehyde dehydrogenase 3 family, member B1	-1.7072352033016909	4.3140451623470016e-7
465	ENSRNOG00000005413	Creb3l1	cAMP responsive element binding protein 3-like 1	-1.706208966628268	6.6158290407102035e-12
466	ENSRNOG00000048264	H4f3	H1.3 linker histone, cluster member	-1.7039035585069893	9.57107836331652e-7
467	ENSRNOG00000018958	Mt3	metallothionein 3	-1.7013948169422985	0.004253187906004138
468	ENSRNOG00000011200	Bhmt	betaine-homocysteine S-methyltransferase	-1.701181901355421	1.4861847725231054e-5
469	ENSRNOG00000025925	Txk	TXK tyrosine kinase	-1.7009857398905168	1.3038854858542676e-4
470	ENSRNOG00000067039	LOC685191	similar to aplysia ras-related homolog A2	-1.6967541707335314	0.0025554701715007366
471	ENSRNOG00000016222	Ppp1r3g	protein phosphatase 1, regulatory subunit 3G	-1.6955554682933383	2.8857591464436088e-5
472	ENSRNOG00000056298	ENSRNOG00000056298	-	-1.6953780235301354	0.009343163729445986
473	ENSRNOG00000003902	Fabp6	fatty acid binding protein 6	-1.690671883314331	1.492720428328262e-6
474	ENSRNOG00000057347	Cebpb	CCAAT/enhancer binding protein beta	-1.689583585839182	3.779982252620246e-12
475	ENSRNOG00000069161	ENSRNOG00000069161	-	-1.6832612585869393	9.551824728655593e-6
476	ENSRNOG00000043128	Armcx4	armadillo repeat containing, X-linked 4	-1.6829374743862395	1.9415789662899734e-15
477	ENSRNOG00000013474	Casz1	castor zinc finger 1	-1.6816875860168976	1.3554826142128006e-5
478	ENSRNOG00000003280	Grin2c	glutamate ionotropic receptor NMDA type subunit 2C	-1.6775472426015359	2.112420657158506e-7
479	ENSRNOG00000005404	Rasgrp1	RAS guanyl releasing protein 1	-1.6748644730235709	9.074874468293478e-5
480	ENSRNOG00000004317	Vipr2	vasoactive intestinal peptide receptor 2	-1.67110914536509	1.960288860487237e-12
481	ENSRNOG00000003538	Adamts4	ADAM metallopeptidase with thrombospondin type 1 motif, 4	-1.6710381255351636	2.724830663302262e-10
482	ENSRNOG00000014659	Ebpl	EBP like	-1.6696867431332605	3.087849234974402e-7
483	ENSRNOG00000011260	Cmbl	carboxymethylenebutenolidase homolog	-1.6667121182962579	1.7138439410151363e-11
484	ENSRNOG00000016260	Polr3g	RNA polymerase III subunit G	-1.666578954380821	7.621052680894429e-7
485	ENSRNOG00000067743	ENSRNOG00000067743	-	-1.662569232033545	1.0650385754100843e-6
486	ENSRNOG00000050834	Fam102a	family with sequence similarity 102, member A	-1.6618039053350513	1.9109393420812567e-6
487	ENSRNOG00000012181	Lpl	lipoprotein lipase	-1.6588060379340488	2.0700976513224658e-8
488	ENSRNOG00000014902	Stx11	syntaxin 11	-1.6492804540477368	1.7460339036478163e-4
489	ENSRNOG00000004100	Trib1	tribbles pseudokinase 1	-1.6441408643053959	6.631202041196746e-5
490	ENSRNOG00000014448	Arntl	aryl hydrocarbon receptor nuclear translocator-like	-1.6398220598162325	2.4141216257761283e-9
491	ENSRNOG00000000221	Abhd5	abhydrolase domain containing 5, lysophosphatidic acid acyltransferase	-1.6353134217579708	4.3731990071852014e-6
492	ENSRNOG00000013591	Ascl3	achaete-scute family bHLH transcription factor 3	-1.6319956081232454	0.004073457365935445
493	ENSRNOG00000011702	Foxp3	forkhead box P3	-1.6311679906663237	8.315783605719319e-5
494	ENSRNOG00000053875	Nacad	NAC alpha domain containing	-1.6302364190244125	1.6250872644870876e-5
495	ENSRNOG00000009963	Ctps1	CTP synthase 1	-1.6277798914675365	3.4144958535407865e-27
496	ENSRNOG00000000552	Col13a1	collagen type XIII alpha 1 chain	-1.625013718910653	6.469026242957493e-11
497	ENSRNOG00000011203	Farp1	FERM, ARH/RhoGEF and pleckstrin domain protein 1	-1.6231685439030759	1.608749712003197e-11
498	ENSRNOG00000004483	Ptprr	protein tyrosine phosphatase, receptor type, R	-1.621046953364933	0.012320588898055271
499	ENSRNOG00000016388	Sphkap	SPHK1 interactor, AKAP domain containing	-1.6200967186151523	0.002524249286952247
500	ENSRNOG00000009980	Plpp1	phospholipid phosphatase 1	-1.6193279274466805	2.3484379787130262e-17
501	ENSRNOG00000015514	Bcat1	branched chain amino acid transaminase 1	-1.6160150060642486	1.2027911681566177e-7
502	ENSRNOG00000004400	Avpr1a	arginine vasopressin receptor 1A	-1.6158417229204154	1.047112980332072e-7
503	ENSRNOG00000026176	Efcab12	EF-hand calcium binding domain 12	-1.6138779539475085	0.040761883886941554
504	ENSRNOG00000021217	Itga10	integrin subunit alpha 10	-1.6123682590617594	0.0010313900007246888
505	ENSRNOG00000009063	Dnajc15	DnaJ heat shock protein family (Hsp40) member C15	-1.6099073496129064	3.910844405887278e-13
506	ENSRNOG00000043378	Nkpd1	NTPase, KAP family P-loop domain containing 1	-1.6098851716763567	2.6951669134333882e-5
507	ENSRNOG00000007202	Sema3d	semaphorin 3D	-1.6097405936047549	0.019556611658832778
508	ENSRNOG00000020923	Tuft1	tuftelin 1	-1.6089104181619336	1.0073535245431901e-5
509	ENSRNOG00000069578	Hist1h2bq	histone cluster 1 H2B family member Q	-1.6071877166479893	3.368931591198452e-9
510	ENSRNOG00000047236	ENSRNOG00000047236	-	-1.6070266900595096	0.0026226444084745284
511	ENSRNOG00000019902	Folr1	folate receptor alpha	-1.603753981345435	3.5312284472378414e-16
512	ENSRNOG00000003869	Sod3	superoxide dismutase 3	-1.6028128918269346	1.5095102993008418e-8
513	ENSRNOG00000012686	Pomc	proopiomelanocortin	-1.602372424714781	2.898564094937407e-4
514	ENSRNOG00000020622	Cilp2	cartilage intermediate layer protein 2	-1.6017161313976997	2.4641483879135612e-5
515	ENSRNOG00000036665	LOC691137	hypothetical protein LOC691137	-1.6008920725581757	0.039634986222300404
516	ENSRNOG00000049045	Hkdc1	hexokinase domain containing 1	-1.6004985965823226	7.053054314708988e-4
517	ENSRNOG00000010517	Fam126a	family with sequence similarity 126, member A	-1.600038389598306	6.511060237347104e-24
518	ENSRNOG00000058249	Pgk1	phosphoglycerate kinase 1	-1.5984510640978289	2.1421994544581744e-9
519	ENSRNOG00000012040	Slc25a48	solute carrier family 25, member 48	-1.5961435264029675	0.013043481297679502
520	ENSRNOG00000006615	Mtap	methylthioadenosine phosphorylase	-1.5961281463424033	4.408237999425853e-7
521	ENSRNOG00000022455	Cptp	ceramide-1-phosphate transfer protein	-1.5936736608158744	5.117147565818143e-36
522	ENSRNOG00000020105	Klhl30	kelch-like family member 30	-1.592545652939917	1.3381340059871567e-6
523	ENSRNOG00000018689	RGD1305464	similar to human chromosome 15 open reading frame 39	-1.5920812978822863	1.4526646938203831e-13
524	ENSRNOG00000016760	Kctd19	potassium channel tetramerization domain containing 19	-1.5884850998335587	5.983298455886424e-6
525	ENSRNOG00000016756	Ptgir	prostaglandin I2 receptor	-1.5830323762223557	0.004195835065784958
526	ENSRNOG00000014508	Mgll	monoglyceride lipase	-1.582641976273574	4.6409915762717864e-8
527	ENSRNOG00000011826	Lzts1	leucine zipper tumor suppressor 1	-1.5821585009508476	4.48080211077638e-13
528	ENSRNOG00000049771	Gstt1	glutathione S-transferase theta 1	-1.5821062513373918	9.336833899138608e-11
529	ENSRNOG00000051816	Tigar	TP53 induced glycolysis regulatory phosphatase	-1.5793814398482116	2.9996495643275613e-12
530	ENSRNOG00000031851	Ndufa4l2	NDUFA4, mitochondrial complex associated like 2	-1.5792660187045144	6.39607035631472e-7
531	ENSRNOG00000000700	Tmem119	transmembrane protein 119	-1.5785407327172754	1.2172107524018105e-4
532	ENSRNOG00000001414	Serpine1	serpin family E member 1	-1.5777231583523896	0.001967139050344658
533	ENSRNOG00000004311	Gpr182	G protein-coupled receptor 182	-1.5660371451807027	9.342533335234198e-6
534	ENSRNOG00000011646	Rem2	RRAD and GEM like GTPase 2	-1.5654598852171921	0.030630400669045394
535	ENSRNOG00000029330	Ca5b	carbonic anhydrase 5B	-1.564853857419368	0.002812768657091771
536	ENSRNOG00000046204	Tspan15	tetraspanin 15	-1.5644091773072712	3.939014210602761e-10
537	ENSRNOG00000068626	ENSRNOG00000068626	-	-1.562000578191475	0.0199647331190961
538	ENSRNOG00000048472	Comp	cartilage oligomeric matrix protein	-1.5613192446023998	1.8371429301700866e-7
539	ENSRNOG00000055314	Msrb1	methionine sulfoxide reductase B1	-1.5599581682851396	1.0170371633569183e-8
540	ENSRNOG00000042536	Pde4d	phosphodiesterase 4D	-1.5570117158818513	3.037859020750761e-5
541	ENSRNOG00000050425	RGD1561777	similar to Na+ dependent glucose transporter 1	-1.5568628733876544	9.125074789954014e-4
542	ENSRNOG00000008187	Ubash3b	ubiquitin associated and SH3 domain containing, B	-1.5568199690425808	1.4541901439497862e-7
543	ENSRNOG00000069800	RGD1563667	similar to TDPOZ3	-1.5566809051799895	0.0377891557526314
544	ENSRNOG00000016044	Mab21l3	mab-21 like 3	-1.555584459459692	8.175661484727109e-5
545	ENSRNOG00000063089	Tmem139	transmembrane protein 139	-1.5485549270117476	0.0021133651606894573
546	ENSRNOG00000002278	Tec	tec protein tyrosine kinase	-1.5475842772959643	2.0835050316680872e-7
547	ENSRNOG00000011951	Plk2	polo-like kinase 2	-1.5470145534913329	3.831141358816252e-5
548	ENSRNOG00000016351	Frrs1	ferric-chelate reductase 1	-1.5455799996688515	6.897853372916232e-10
549	ENSRNOG00000042607	Rhof	ras homolog family member F, filopodia associated	-1.5447385868860506	3.3555243089317184e-6
550	ENSRNOG00000040301	Galntl5	polypeptide N-acetylgalactosaminyltransferase-like 5	-1.5444409651328204	0.04120976505211493
551	ENSRNOG00000027971	Lrrc31	leucine rich repeat containing 31	-1.543060572582949	0.043077135565203144
552	ENSRNOG00000012156	Ostf1	osteoclast stimulating factor 1	-1.5422726981164383	9.917065594594317e-12
553	ENSRNOG00000014529	Ube2q2	ubiquitin conjugating enzyme E2 Q2	-1.5421754861096004	0.030621368755495135
554	ENSRNOG00000015375	Lsm1	LSM1 homolog, mRNA degradation associated	-1.5401551915806244	3.90507215691542e-9
555	ENSRNOG00000004229	Tac3	tachykinin precursor 3	-1.5397932974162223	0.01929287847390856
556	ENSRNOG00000028085	Tmem255a	transmembrane protein 255A	-1.5390679284672868	4.735309098238999e-16
557	ENSRNOG00000069295	ENSRNOG00000069295	-	-1.5381682035552329	0.03403707586050161
558	ENSRNOG00000019253	Bcar1	BCAR1 scaffold protein, Cas family member	-1.5366693978472192	2.6316536787379734e-14
559	ENSRNOG00000012443	Cpt2	carnitine palmitoyltransferase 2	-1.5330826954448968	2.461987716330514e-16
560	ENSRNOG00000043451	Spp1	secreted phosphoprotein 1	-1.5328814783280131	0.045584949153589606
561	ENSRNOG00000010580	Acot7	acyl-CoA thioesterase 7	-1.532678222027473	2.0303880874248196e-5
562	ENSRNOG00000025868	Klhl33	kelch-like family member 33	-1.531854999180617	8.631377616357734e-4
563	ENSRNOG00000064701	Ncs1	neuronal calcium sensor 1	-1.5315251215862118	1.9227805797395416e-4
564	ENSRNOG00000025160	Tlcd4	TLC domain containing 4	-1.5311769726418525	1.294752531579758e-4
565	ENSRNOG00000064423	LOC685793	similar to serine/threonine kinase	-1.5306788710889059	0.02309146392892853
566	ENSRNOG00000053494	Mcpt1l1	mast cell protease 1-like 1	-1.529764150227006	0.028089150964220856
567	ENSRNOG00000020776	Dhcr7	7-dehydrocholesterol reductase	-1.525215923500532	5.662414933424925e-10
568	ENSRNOG00000024523	Dnai2	dynein, axonemal, intermediate chain 2	-1.52465554778107	0.015473193383146242
569	ENSRNOG00000003104	Trpv2	transient receptor potential cation channel, subfamily V, member 2	-1.5175742806531634	7.53140278832997e-9
570	ENSRNOG00000007808	Nap1l5	nucleosome assembly protein 1-like 5	-1.5170099232817087	1.100487821915241e-4
571	ENSRNOG00000047706	RT1-CE2	RT1 class I, locus CE2	-1.5153590330492177	4.5157302837028164e-4
572	ENSRNOG00000013532	Pgam2	phosphoglycerate mutase 2	-1.5120085703547586	0.01545986057162521
573	ENSRNOG00000063905	Hsd3b3	hydroxy-delta-5-steroid dehydrogenase, 3 beta- and steroid delta-isomerase 3	-1.511803941286231	4.7759525530797573e-8
574	ENSRNOG00000017307	Prss23	serine protease 23	-1.5114068498737805	8.86512739723659e-9
575	ENSRNOG00000064437	ENSRNOG00000064437	-	-1.5105783577586904	0.006177850202388418
576	ENSRNOG00000042623	Sh2d4b	SH2 domain containing 4B	-1.5079739336416682	0.011832644558463227
577	ENSRNOG00000014087	Kifc3	kinesin family member C3	-1.5079592461087765	1.9306734165892176e-10
578	ENSRNOG00000031855	Actr3b	actin related protein 3B	-1.505955899064862	2.517201214019015e-5
579	ENSRNOG00000066547	LOC100910107	ubiquitin carboxyl-terminal hydrolase DUB-1-like	-1.5047993377025817	0.0071292366780175975
580	ENSRNOG00000046261	Acp5	acid phosphatase 5, tartrate resistant	-1.5044735755899372	7.640632849683624e-17
581	ENSRNOG00000013663	Tmem86a	transmembrane protein 86A	-1.5035939987630822	2.8641640109041115e-13
582	ENSRNOG00000011881	Slc25a15	solute carrier family 25 member 15	-1.503045010453159	1.308780663850351e-4
583	ENSRNOG00000061863	H1f6	H1.6 linker histone, cluster member	-1.500906575277874	0.04191362407207851
584	ENSRNOG00000066849	RGD1564748	collagen alpha-1(VII) chain-like	-1.5001079660892365	0.01081286544208904
585	ENSRNOG00000025075	Relt	RELT, TNF receptor	-1.4967075378000672	3.563995816214323e-8
586	ENSRNOG00000065000	Lrrc8c	leucine rich repeat containing 8 VRAC subunit C	-1.4957502089079078	9.606596640102963e-17
587	ENSRNOG00000016769	Rab38	RAB38, member RAS oncogene family	-1.4942364126416017	5.164305987948994e-5
588	ENSRNOG00000014378	Il1r2	interleukin 1 receptor type 2	-1.494147213762492	0.02660585915008385
589	ENSRNOG00000065786	ENSRNOG00000065786	-	-1.493016662817473	6.063700005089632e-13
590	ENSRNOG00000024456	Radil	Rap associating with DIL domain	-1.4910946737337014	5.602895073723327e-8
591	ENSRNOG00000034200	Atp8a1	ATPase phospholipid transporting 8A1	-1.4879564831223815	1.0287421651251178e-8
592	ENSRNOG00000042716	RGD1562699	RGD1562699	-1.485681542060566	0.018270932226186976
593	ENSRNOG00000033433	Csrnp1	cysteine and serine rich nuclear protein 1	-1.4846055894990218	2.2791777617457933e-6
594	ENSRNOG00000040136	Stpg4	sperm-tail PG-rich repeat containing 4	-1.4843792844124575	0.004219184576375865
595	ENSRNOG00000003269	ENSRNOG00000003269	-	-1.483816835180974	1.954137528895233e-10
596	ENSRNOG00000068516	Hist1h2ail1	histone cluster 1 H2a family member I like 1	-1.4834229378315513	7.598844467898362e-4
597	ENSRNOG00000002722	Sec14l1	SEC14-like lipid binding 1	-1.4828815055118953	4.1391423904131423e-16
598	ENSRNOG00000002159	Gpat3	glycerol-3-phosphate acyltransferase 3	-1.481122046652619	4.137387651315594e-5
599	ENSRNOG00000019217	ENSRNOG00000019217	-	-1.478366354146904	7.271080202392139e-7
600	ENSRNOG00000011471	Fgf9	fibroblast growth factor 9	-1.4782106014071985	7.377334821929193e-5
601	ENSRNOG00000068332	ENSRNOG00000068332	-	-1.4770312618963013	7.8386182775611e-5
602	ENSRNOG00000019202	Pvr	PVR cell adhesion molecule	-1.4766368112121062	4.721579652759471e-11
603	ENSRNOG00000006787	Dhcr24	24-dehydrocholesterol reductase	-1.4765110329402913	2.032436933146164e-4
604	ENSRNOG00000069594	ENSRNOG00000069594	-	-1.4734922182136543	0.02130107050552839
605	ENSRNOG00000022189	Htatip2	HIV-1 Tat interactive protein 2	-1.4713411962188019	2.614215496969227e-6
606	ENSRNOG00000016643	Lpcat2	lysophosphatidylcholine acyltransferase 2	-1.4685216608449383	1.4855053922568717e-6
607	ENSRNOG00000005853	Tacr1	tachykinin receptor 1	-1.4657649248803417	0.0032981782394003716
608	ENSRNOG00000051624	Hspe1	heat shock protein family E (Hsp10) member 1	-1.4621279090707135	2.850229523564528e-7
609	ENSRNOG00000033653	Mpp3	MAGUK p55 scaffold protein 3	-1.4612849936393892	2.8457036121260995e-8
610	ENSRNOG00000063618	Cxcr2	C-X-C motif chemokine receptor 2	-1.4579316387844623	0.0211252726619178
611	ENSRNOG00000003807	Wnt9b	Wnt family member 9B	-1.4570294005231144	0.04744799219200664
612	ENSRNOG00000005608	Tead4	TEA domain transcription factor 4	-1.4528020330206635	4.4650589417389716e-9
613	ENSRNOG00000024975	Atp8b3	ATPase phospholipid transporting 8B3	-1.4506446578822214	3.895517181612634e-5
614	ENSRNOG00000004029	Nectin4	nectin cell adhesion molecule 4	-1.4489044621808709	0.04286712241745578
615	ENSRNOG00000015727	Loxl4	lysyl oxidase-like 4	-1.4447394354058827	8.615916650732732e-7
616	ENSRNOG00000001143	Cit	citron rho-interacting serine/threonine kinase	-1.444722730284236	2.73447394027417e-6
617	ENSRNOG00000019982	Ethe1	ETHE1, persulfide dioxygenase	-1.4447116774275004	2.422101027011808e-7
618	ENSRNOG00000013552	Scd	stearoyl-CoA desaturase	-1.4393815019879537	0.001438232063215142
619	ENSRNOG00000006628	Dusp16	dual specificity phosphatase 16	-1.4378823145124395	2.0438955623617663e-7
620	ENSRNOG00000066013	ENSRNOG00000066013	-	-1.437563456411626	0.0015386352106273404
621	ENSRNOG00000019433	Rab3a	RAB3A, member RAS oncogene family	-1.4372398494912209	3.269231114899231e-9
622	ENSRNOG00000020729	Stc2	stanniocalcin 2	-1.436530710477253	6.0103545865412366e-6
623	ENSRNOG00000032788	Dysf	dysferlin	-1.4329793223924638	3.0890485333357326e-13
624	ENSRNOG00000071200	RGD1559714	similar to TDPOZ3	-1.432758777609746	0.020810700648291436
625	ENSRNOG00000008219	Ccdc33	coiled-coil domain containing 33	-1.432250162796601	0.013641298243299496
626	ENSRNOG00000006828	Baz1a	bromodomain adjacent to zinc finger domain, 1A	-1.4294566378627325	6.447433534624122e-10
627	ENSRNOG00000013971	Psat1	phosphoserine aminotransferase 1	-1.429051563481576	0.0011456074212451799
628	ENSRNOG00000007830	Apold1	apolipoprotein L domain containing 1	-1.427556798656702	1.5887333961995063e-12
629	ENSRNOG00000029441	Klhl2	kelch-like family member 2	-1.425640083061291	1.4708165910036624e-8
630	ENSRNOG00000007354	Trpa1	transient receptor potential cation channel, subfamily A, member 1	-1.4231787577259056	2.4355695907645017e-4
631	ENSRNOG00000010490	Hes2	hes family bHLH transcription factor 2	-1.4207940387743978	0.001992636372198065
632	ENSRNOG00000013371	Bpifb6	BPI fold containing family B, member 6	-1.4186233901462326	9.248293004917833e-6
633	ENSRNOG00000020792	Etv4	ETS variant transcription factor 4	-1.4159180461223555	0.0032486301722203744
634	ENSRNOG00000014980	Mob4	MOB family member 4, phocein	-1.4139348809219559	3.6185165328172436e-7
635	ENSRNOG00000017788	Katnal2	katanin catalytic subunit A1 like 2	-1.4134229173754245	0.004874481560818898
636	ENSRNOG00000010326	Col20a1	collagen type XX alpha 1 chain	-1.4124223935382487	2.6769746450159834e-10
637	ENSRNOG00000004932	Sel1l3	SEL1L family member 3	-1.411006332116542	1.3038854858542676e-4
638	ENSRNOG00000008970	Pcdh17	protocadherin 17	-1.4084728068636811	8.240735745370046e-12
639	ENSRNOG00000008236	Decr1	2,4-dienoyl-CoA reductase 1	-1.408262919437455	6.156820738853738e-12
640	ENSRNOG00000009646	Nyx	nyctalopin	-1.4055925852745021	0.022657597462853053
641	ENSRNOG00000023803	Cmya5	cardiomyopathy associated 5	-1.4049977301964822	1.3408009486562343e-7
642	ENSRNOG00000043866	ENSRNOG00000043866	-	-1.4048128139424367	8.640395870524632e-7
643	ENSRNOG00000050585	Pgam1	phosphoglycerate mutase 1	-1.4038126830907542	2.8852801667616266e-19
644	ENSRNOG00000022533	Micall2	MICAL-like 2	-1.4033078451298546	1.2161704030268812e-10
645	ENSRNOG00000002959	Shroom4	shroom family member 4	-1.4031253876793615	0.0023620622489231597
646	ENSRNOG00000014007	Gfod1	glucose-fructose oxidoreductase domain containing 1	-1.4030349471623673	2.3218685800886597e-4
647	ENSRNOG00000001874	Slc7a4	solute carrier family 7, member 4	-1.4018900817707165	6.1878334105471275e-6
648	ENSRNOG00000019466	Agpat2	1-acylglycerol-3-phosphate O-acyltransferase 2	-1.39947844589311	2.7102879531825633e-8
649	ENSRNOG00000043300	Enho	energy homeostasis associated	-1.3978915094909434	0.03251399054033814
650	ENSRNOG00000067070	Immp2l	inner mitochondrial membrane peptidase subunit 2	-1.3973269372586863	8.961582300110278e-10
651	ENSRNOG00000017558	Tubb2a	tubulin, beta 2A class IIa	-1.3967971079786636	3.179863540298728e-7
652	ENSRNOG00000015084	Necab2	N-terminal EF-hand calcium binding protein 2	-1.3901713014771113	0.04776000040047101
653	ENSRNOG00000018693	Asgr1	asialoglycoprotein receptor 1	-1.3884019288486629	0.035397177371207435
654	ENSRNOG00000070152	ENSRNOG00000070152	-	-1.3871728411245463	0.009570146388849477
655	ENSRNOG00000018215	Slc22a6	solute carrier family 22 member 6	-1.3856394444779365	0.01205673009465371
656	ENSRNOG00000020202	Asrgl1	asparaginase and isoaspartyl peptidase 1	-1.3855214099931914	3.693859532979248e-9
657	MSTRG.9561	MSTRG.9561	-	-1.3852352747477363	0.018191627292089268
658	ENSRNOG00000005309	Scn8a	sodium voltage-gated channel alpha subunit 8	-1.385043027126333	9.29447104363635e-6
659	ENSRNOG00000020197	Cd248	CD248 molecule	-1.3848895468827769	6.189734974623027e-8
660	ENSRNOG00000006984	Mapk11	mitogen-activated protein kinase 11	-1.3818884001874376	1.0030551502176575e-7
661	ENSRNOG00000016704	Pcyox1	prenylcysteine oxidase 1	-1.3818636953633407	1.3831080031573078e-12
662	ENSRNOG00000013791	Enpp3	ectonucleotide pyrophosphatase/phosphodiesterase 3	-1.3778545031107312	0.0012308043746060702
663	ENSRNOG00000050215	Cdsn	corneodesmosin	-1.3728856400040772	0.038489142588007806
664	ENSRNOG00000020124	Lrrc51	leucine rich repeat containing 51	-1.3724441817434887	4.263022265082564e-6
665	ENSRNOG00000056651	LOC100361913	rCG54286-like	-1.3713678259555666	4.116587362620212e-6
666	ENSRNOG00000042560	Bag4	BAG cochaperone 4	-1.370998698759444	9.840550799617798e-11
667	ENSRNOG00000001544	Cyyr1	cysteine and tyrosine rich 1	-1.369309265155065	1.4660339335526138e-10
668	ENSRNOG00000013053	Trpm6	transient receptor potential cation channel, subfamily M, member 6	-1.3681020680061136	0.02672602092559586
669	ENSRNOG00000003494	Ppfia4	PTPRF interacting protein alpha 4	-1.3678662973552593	5.7199524776545046e-8
670	ENSRNOG00000012054	Zmpste24	zinc metallopeptidase STE24	-1.3663926287202446	2.022450353790835e-12
671	ENSRNOG00000007582	Zswim4	zinc finger, SWIM-type containing 4	-1.3658008528731522	3.793857441105639e-11
672	ENSRNOG00000009550	Sqle	squalene epoxidase	-1.3648129088340735	0.0011888059991881019
673	ENSRNOG00000060410	Pcdh1	protocadherin 1	-1.3622559128942782	2.2499975938398745e-10
674	ENSRNOG00000023657	Gprin3	GPRIN family member 3	-1.3610021893163067	8.405338822195889e-7
675	ENSRNOG00000010753	Aig1	androgen-induced 1	-1.3606972555312808	6.148273983677672e-6
676	ENSRNOG00000013659	Tex2	testis expressed 2	-1.3601102512047034	5.5698706277640754e-9
677	ENSRNOG00000062781	Ugt2b10	UDP glucuronosyltransferase 2 family, polypeptide B10	-1.359752541041507	0.008638004457173694
678	ENSRNOG00000009325	Fuca1	alpha-L-fucosidase 1	-1.3574743192150813	5.208353557558316e-4
679	ENSRNOG00000013027	Rgl3	ral guanine nucleotide dissociation stimulator-like 3	-1.353972056033925	3.662157341538526e-7
680	ENSRNOG00000009350	Sez6	seizure related 6 homolog	-1.3529354816382821	0.006006392760155312
681	ENSRNOG00000019843	St3gal3	ST3 beta-galactoside alpha-2,3-sialyltransferase 3	-1.3514868203126857	1.971121735718515e-13
682	ENSRNOG00000024243	Cadm4	cell adhesion molecule 4	-1.3498422069084501	0.002349053648875076
683	ENSRNOG00000014525	Hspd1	heat shock protein family D (Hsp60) member 1	-1.3451160607754549	5.072275048149102e-8
684	ENSRNOG00000016281	Col4a1	collagen type IV alpha 1 chain	-1.344949481337713	3.467769469686323e-7
685	ENSRNOG00000020485	Vav3	vav guanine nucleotide exchange factor 3	-1.342610306827585	3.258872911734101e-5
686	ENSRNOG00000007002	Lif	LIF, interleukin 6 family cytokine	-1.3390844178274652	0.04191362407207851
687	ENSRNOG00000021438	Tuba1c	tubulin, alpha 1C	-1.336693320753653	1.578845582597988e-7
688	ENSRNOG00000063449	ENSRNOG00000063449	-	-1.335105141433654	0.02631057875298699
689	ENSRNOG00000038445	Rnf225	ring finger protein 225	-1.3348201029267044	4.178399424619797e-5
690	ENSRNOG00000031955	Calml3	calmodulin-like 3	-1.3348018022262245	3.1085898633750924e-6
691	ENSRNOG00000022844	Pdzrn4	PDZ domain containing RING finger 4	-1.3334428125221234	0.0016395290086414567
692	ENSRNOG00000068063	Rnaseh2a	ribonuclease H2, subunit A	-1.33145671438026	0.015546081929225783
693	ENSRNOG00000002258	Tmem150c	transmembrane protein 150C	-1.3307371397861405	8.683126525623926e-5
694	ENSRNOG00000046428	Lrrc75b	leucine rich repeat containing 75B	-1.3299642524172852	0.03181536416158956
695	ENSRNOG00000068913	Mpzl3	myelin protein zero-like 3	-1.3282063341808419	6.978627895466153e-6
696	ENSRNOG00000005719	Emc4	ER membrane protein complex subunit 4	-1.3260780711651061	4.940211582085339e-5
697	ENSRNOG00000018145	Crat	carnitine O-acetyltransferase	-1.3258045761963162	1.2525034389267575e-16
698	ENSRNOG00000010064	Abcc4	ATP binding cassette subfamily C member 4	-1.3235007927404436	3.3627114744507734e-7
699	ENSRNOG00000017481	Sucla2	succinate-CoA ligase ADP-forming subunit beta	-1.3231003329004711	1.7020054424704506e-6
700	ENSRNOG00000002196	Ociad2	OCIA domain containing 2	-1.3230221101833706	1.1940873648447424e-15
701	ENSRNOG00000000940	Flt1	Fms related receptor tyrosine kinase 1	-1.3229222974193173	1.6720287160237798e-8
702	ENSRNOG00000045605	Uxs1	UDP-glucuronate decarboxylase 1	-1.3210449470504666	2.765100174717003e-5
703	ENSRNOG00000047014	Homer1	homer scaffold protein 1	-1.320553561500671	0.0010846523189063657
704	ENSRNOG00000050205	Afmid	arylformamidase	-1.3199524560512537	3.388090512088105e-5
705	ENSRNOG00000010633	Acsl1	acyl-CoA synthetase long-chain family member 1	-1.3190787508063493	1.1699766946405194e-8
706	ENSRNOG00000004479	Aurka	aurora kinase A	-1.3188823404097083	2.8075885040505958e-5
707	ENSRNOG00000018911	Pfkfb3	6-phosphofructo-2-kinase/fructose-2,6-biphosphatase 3	-1.3165103023761981	7.251124672751939e-6
708	ENSRNOG00000009222	Epha2	Eph receptor A2	-1.315413448186194	1.5480103491836536e-4
709	ENSRNOG00000013766	Acaa2	acetyl-CoA acyltransferase 2	-1.3097565770927388	1.3771729625583646e-7
710	ENSRNOG00000002309	Hlx	H2.0-like homeobox	-1.3096262214710137	2.8221375885882996e-4
711	ENSRNOG00000027319	Ephx3	epoxide hydrolase 3	-1.309340284603487	0.04201440666485977
712	ENSRNOG00000014453	Anxa5	annexin A5	-1.3092630622248074	1.603081860644626e-6
713	ENSRNOG00000001229	Col18a1	collagen type XVIII alpha 1 chain	-1.309155984510257	4.1550772639209164e-26
714	ENSRNOG00000013887	Adra2b	adrenoceptor alpha 2B	-1.3086954439797824	0.001844821419867334
715	ENSRNOG00000016758	Loxl2	lysyl oxidase-like 2	-1.3081760300933465	1.341134602752094e-6
716	ENSRNOG00000022738	ENSRNOG00000022738	-	-1.306488476905235	0.045647904232103555
717	ENSRNOG00000013694	Ntng2	netrin G2	-1.3060138031037518	2.2172041444716425e-7
718	ENSRNOG00000027859	Tmem26	transmembrane protein 26	-1.3052365373772283	8.434072096206598e-7
719	ENSRNOG00000000167	Alas2	5'-aminolevulinate synthase 2	-1.304767485044736	0.009771532663056172
720	ENSRNOG00000020891	Kif9	kinesin family member 9	-1.3029345328282456	0.00772539481491336
721	ENSRNOG00000009481	Ddhd1	DDHD domain containing 1	-1.3023406464753255	8.825583338161907e-5
722	ENSRNOG00000001607	Adamts1	ADAM metallopeptidase with thrombospondin type 1 motif, 1	-1.3014374418730754	4.179068875779806e-9
723	ENSRNOG00000030187	Mmp12	matrix metallopeptidase 12	-1.3003706486899316	0.006565349717522169
724	ENSRNOG00000049911	Cbr1	carbonyl reductase 1	-1.2997801965877218	4.0793304277150434e-7
725	ENSRNOG00000025815	Cdr2l	cerebellar degeneration-related protein 2-like	-1.2993561611562632	1.7777872939042897e-16
726	ENSRNOG00000020579	Col7a1	collagen type VII alpha 1 chain	-1.297853151231579	0.00745053057124878
727	ENSRNOG00000042237	Tm6sf2	transmembrane 6 superfamily member 2	-1.2962052040715173	0.0019756375386349475
728	ENSRNOG00000070930	Hilpda	hypoxia inducible lipid droplet-associated	-1.295371276222539	4.928857256323714e-4
729	ENSRNOG00000070245	Vstm1	V-set and transmembrane domain containing 1	-1.2944327700892855	0.0026022115693852773
730	ENSRNOG00000068968	ENSRNOG00000068968	-	-1.2936467351507979	0.013356177710783297
731	ENSRNOG00000030776	Sytl2	synaptotagmin-like 2	-1.2915332389906296	1.286032772670284e-9
732	ENSRNOG00000020063	Nfkbib	NFKB inhibitor beta	-1.2913689677664073	6.627874920646568e-10
733	ENSRNOG00000032238	Plcd1	phospholipase C, delta 1	-1.2904601792056998	1.0596013943126379e-5
734	ENSRNOG00000010882	Sptlc1	serine palmitoyltransferase, long chain base subunit 1	-1.2901752000129065	2.3961512442531755e-7
735	ENSRNOG00000064293	Gdpgp1	GDP-D-glucose phosphorylase 1	-1.2901733886420201	5.172646189771266e-14
736	ENSRNOG00000010107	Palldl1	palladin-like 1	-1.2860897014203225	1.0779745121918414e-4
737	ENSRNOG00000020433	Actn4	actinin alpha 4	-1.2840942520736889	1.29130583178599e-8
738	ENSRNOG00000049236	Myh9	myosin, heavy chain 9	-1.2813814523785505	1.506318825708288e-7
739	ENSRNOG00000065120	LOC103694176	60 kDa heat shock protein, mitochondrial pseudogene	-1.2791770067016808	9.698580802985116e-9
740	ENSRNOG00000036684	Pcyt2	phosphate cytidylyltransferase 2, ethanolamine	-1.278038149614154	8.409661550180355e-8
741	ENSRNOG00000014162	Plekhb2	pleckstrin homology domain containing B2	-1.2743597824873454	9.333340223631654e-13
742	ENSRNOG00000023381	Proca1	protein interacting with cyclin A1	-1.2736743656471614	7.354638701567682e-5
743	ENSRNOG00000042094	Prr13	proline rich 13	-1.2732528233566003	2.421873591064329e-8
744	ENSRNOG00000030391	Ei24	EI24, autophagy associated transmembrane protein	-1.2720896845617427	5.467448798268552e-10
745	ENSRNOG00000059016	Tspan12	tetraspanin 12	-1.2718076021739455	1.7472431890658118e-6
746	ENSRNOG00000001602	Ltn1	listerin E3 ubiquitin protein ligase 1	-1.2711637121546215	2.5644054323546854e-7
747	ENSRNOG00000002667	Lamc2	laminin subunit gamma 2	-1.2703178940199782	0.008481071032405928
748	ENSRNOG00000011521	Filip1	filamin A interacting protein 1	-1.2698670121495197	1.2027911681566177e-7
749	ENSRNOG00000061379	ENSRNOG00000061379	-	-1.2690154649062826	5.863883592549345e-7
750	ENSRNOG00000024839	Tysnd1	trypsin like peroxisomal matrix peptidase 1	-1.268717080193457	7.482590337705588e-10
751	ENSRNOG00000014610	Anpep	alanyl aminopeptidase, membrane	-1.2683827011447393	6.436144017681469e-11
752	ENSRNOG00000019949	Mrps12	mitochondrial ribosomal protein S12	-1.2682489338336653	5.391003841022073e-8
753	ENSRNOG00000002693	Nme1	NME/NM23 nucleoside diphosphate kinase 1	-1.267734342133517	8.489227405160262e-7
754	ENSRNOG00000000610	Cisd1	CDGSH iron sulfur domain 1	-1.2669796651277399	4.033165240933557e-12
755	ENSRNOG00000037500	Pus1	pseudouridine synthase 1	-1.2652065715773015	1.3059821112223314e-7
756	ENSRNOG00000059579	Gpt2	glutamic--pyruvic transaminase 2	-1.2651177485258154	0.0024773753574191724
757	ENSRNOG00000008759	Csf3r	colony stimulating factor 3 receptor	-1.2648629905486408	0.021048748192695
758	ENSRNOG00000018131	Slc16a4	solute carrier family 16, member 4	-1.2643543076618926	3.448033022634059e-5
759	ENSRNOG00000014765	Vapa	VAMP associated protein A	-1.262896376244925	3.0258761276780115e-7
760	ENSRNOG00000011441	Tpd52	tumor protein D52	-1.2612970884605854	9.531194490489514e-6
761	ENSRNOG00000006143	Ngly1	N-glycanase 1	-1.2605378737371218	1.6788618493906898e-7
762	ENSRNOG00000048823	LOC688542	similar to carboxylesterase 5	-1.2595684092084234	0.013208483326250861
763	ENSRNOG00000010079	Ca3	carbonic anhydrase 3	-1.2590771567957195	0.018963857084027685
764	ENSRNOG00000017220	Tcirg1	T-cell immune regulator 1, ATPase H+ transporting V0 subunit A3	-1.2586710861663803	7.295537752566349e-7
765	ENSRNOG00000007118	Eva1a	eva-1 homolog A, regulator of programmed cell death	-1.2585737749770634	0.0030481072847047966
766	ENSRNOG00000001843	Bcl6	BCL6, transcription repressor	-1.2560978062546833	3.1630148015829345e-4
767	ENSRNOG00000050317	Uhrf1bp1l	UHRF1 binding protein 1-like	-1.2557006078378803	2.3378600095498126e-8
768	ENSRNOG00000001840	Rep15	RAB15 effector protein	-1.2554541026936088	0.0337656551444886
769	ENSRNOG00000006094	Cd44	CD44 molecule (Indian blood group)	-1.255091247764447	0.004804746014377626
770	ENSRNOG00000007882	Ablim2	actin binding LIM protein family, member 2	-1.2540703230752224	1.4676447771279577e-6
771	ENSRNOG00000013408	Npas2	neuronal PAS domain protein 2	-1.2535019965905776	1.1057814117419098e-9
772	ENSRNOG00000065526	ENSRNOG00000065526	-	-1.250392347055409	0.005520694742762265
773	ENSRNOG00000006400	Tbc1d14	TBC1 domain family, member 14	-1.2492730759816677	3.2023355599754116e-17
774	ENSRNOG00000022767	Elfn1	extracellular leucine-rich repeat and fibronectin type III domain containing 1	-1.2491150907014936	0.0212426447000098
775	ENSRNOG00000032832	Mmp10	matrix metallopeptidase 10	-1.2485960255661763	0.0010443485484016915
776	ENSRNOG00000025245	RGD1311946	similar to RIKEN cDNA 1810055G02	-1.247263279560574	1.5683571312642796e-5
777	ENSRNOG00000013867	Fgf1	fibroblast growth factor 1	-1.2450216496731104	0.004314118174161298
778	ENSRNOG00000070622	Hsd3b1	hydroxy-delta-5-steroid dehydrogenase, 3 beta- and steroid delta-isomerase 1	-1.243630556793715	1.690055678284665e-8
779	ENSRNOG00000028910	ENSRNOG00000028910	-	-1.2405597145637401	9.686517528373391e-11
780	ENSRNOG00000002425	Pctp	phosphatidylcholine transfer protein	-1.2397147084570657	1.7322508169095442e-11
781	ENSRNOG00000024346	Plet1	placenta expressed transcript 1	-1.237642391432596	0.0017101838925964177
782	ENSRNOG00000003496	Tbc1d9	TBC1 domain family member 9	-1.2368614036834853	9.967025539667477e-17
783	ENSRNOG00000019244	Mxra8	matrix remodeling associated 8	-1.2366644857503821	1.954334788446088e-7
784	ENSRNOG00000016980	Qprt	quinolinate phosphoribosyltransferase	-1.2363960797445595	0.005729173083754226
785	ENSRNOG00000009005	Slco2a1	solute carrier organic anion transporter family, member 2a1	-1.2343557008006716	1.2804779156817907e-5
786	ENSRNOG00000007606	Rnf43	ring finger protein 43	-1.2326078556931284	3.233207357568447e-5
787	ENSRNOG00000063575	ENSRNOG00000063575	-	-1.2321174934255066	5.031709988505761e-4
788	ENSRNOG00000054217	Runx3	RUNX family transcription factor 3	-1.2312362071962963	5.14365081478735e-5
789	ENSRNOG00000007573	Hoxb9	homeo box B9	-1.2311862245753185	0.0018683435999919877
790	ENSRNOG00000009409	Fbxo2	F-box protein 2	-1.2282486465935358	4.046215156244185e-5
791	ENSRNOG00000017150	Med10	mediator complex subunit 10	-1.228123414291085	7.895734015120913e-14
792	ENSRNOG00000000542	Dnah8	dynein, axonemal, heavy chain 8	-1.2263698662186706	0.038257734273884333
793	ENSRNOG00000031247	Lekr1	leucine, glutamate and lysine rich 1	-1.222855203388936	2.9555512548305697e-6
794	ENSRNOG00000013463	Kcnj8	potassium inwardly-rectifying channel, subfamily J, member 8	-1.2208566531910645	1.7146444141040064e-7
795	ENSRNOG00000009227	Aplnr	apelin receptor	-1.2207112392638262	3.3548865835328774e-4
796	ENSRNOG00000000081	Antxr2	ANTXR cell adhesion molecule 2	-1.2206980122419624	0.001113609691316884
797	ENSRNOG00000036701	Actg1	actin, gamma 1	-1.2206370127570987	1.294752531579758e-4
798	ENSRNOG00000013376	Mvd	mevalonate diphosphate decarboxylase	-1.2191760983376676	0.013860051820526628
799	ENSRNOG00000060435	Kcnq4	potassium voltage-gated channel subfamily Q member 4	-1.2168955085952708	0.008479702037148162
800	ENSRNOG00000011921	Dusp4	dual specificity phosphatase 4	-1.2157765130160183	9.337243192047204e-4
801	ENSRNOG00000017401	Tmco4	transmembrane and coiled-coil domains 4	-1.2157555820071302	6.085605657526587e-10
802	ENSRNOG00000000442	Notch4	notch receptor 4	-1.2153030787542198	6.785130938189302e-10
803	ENSRNOG00000009085	Prkag2	protein kinase AMP-activated non-catalytic subunit gamma 2	-1.2151137324140027	1.190708486971196e-9
804	MSTRG.1346	MSTRG.1346	-	-1.2147889012742135	0.04281927213390502
805	ENSRNOG00000002449	Maged2	MAGE family member D2	-1.2147305739020267	2.0520420099482588e-4
806	ENSRNOG00000013683	S1pr1	sphingosine-1-phosphate receptor 1	-1.214649550332827	3.785616863327731e-5
807	ENSRNOG00000012972	Alox5	arachidonate 5-lipoxygenase	-1.2146277861621055	0.0207714065136627
808	ENSRNOG00000010390	Hmbs	hydroxymethylbilane synthase	-1.2133722441563317	6.777894831422888e-9
809	ENSRNOG00000015057	Tmem102	transmembrane protein 102	-1.212981598955914	0.028872461747640535
810	ENSRNOG00000022921	Dact2	dishevelled-binding antagonist of beta-catenin 2	-1.2127206949237626	0.00919776047957084
811	ENSRNOG00000002171	Phldb2	pleckstrin homology-like domain, family B, member 2	-1.2122803832117903	4.4757548052165726e-10
812	ENSRNOG00000019490	Slc20a2	solute carrier family 20 member 2	-1.2121406469091403	1.9894682305186346e-12
813	ENSRNOG00000004972	Upp1	uridine phosphorylase 1	-1.2105177293294938	1.9464339710619903e-5
814	ENSRNOG00000017243	Bnip3	BCL2 interacting protein 3	-1.2089642038470034	1.634920076874427e-10
815	ENSRNOG00000030714	Bsn	bassoon (presynaptic cytomatrix protein)	-1.208698318785366	7.0561880982367806e-6
816	ENSRNOG00000004063	Sh3pxd2b	SH3 and PX domains 2B	-1.2086763849545494	3.75280355930977e-5
817	ENSRNOG00000064521	H3c13	H3 clustered histone 13	-1.208449182124816	4.2857600483145175e-5
818	ENSRNOG00000017036	Sec11c	SEC11 homolog C, signal peptidase complex subunit	-1.207418259785054	3.8909526076586774e-14
819	ENSRNOG00000021323	Ca13	carbonic anhydrase 13	-1.2051777485481134	4.49728200163676e-6
820	ENSRNOG00000007237	Id2	inhibitor of DNA binding 2	-1.2045913985267973	6.779287452675404e-6
821	ENSRNOG00000001876	Ccdc74a	coiled-coil domain containing 74A	-1.204573271932904	0.02140740331870576
822	ENSRNOG00000020167	Reep5	receptor accessory protein 5	-1.2029984995333918	1.3525344561367518e-11
823	ENSRNOG00000004841	Akap6	A-kinase anchoring protein 6	-1.2023837083328877	4.743669370085252e-5
824	ENSRNOG00000033076	Thnsl1	threonine synthase-like 1	-1.2013828414109406	1.3316151989139568e-7
825	ENSRNOG00000006839	Arl5a	ADP-ribosylation factor like GTPase 5A	-1.200936610010432	3.8465447856533916e-6
826	ENSRNOG00000065163	ENSRNOG00000065163	-	-1.200638099998847	4.9765914205883285e-6
827	ENSRNOG00000012546	Frmpd1	FERM and PDZ domain containing 1	-1.1985684722451766	0.0067289341003599745
828	ENSRNOG00000010626	Sphk1	sphingosine kinase 1	-1.1979958067159395	8.08563428105093e-9
829	ENSRNOG00000008157	Syn2	synapsin II	-1.1960256944276715	0.001325888073832283
830	ENSRNOG00000018964	Gss	glutathione synthetase	-1.1953824352853697	4.013270894997473e-5
831	ENSRNOG00000009629	Car2	carbonic anhydrase 2	-1.1948448884061642	0.020754882409943817
832	ENSRNOG00000004482	Ccdc88c	coiled-coil domain containing 88C	-1.1941322317416863	1.3415182523294282e-4
833	ENSRNOG00000018051	Farp2	FERM, ARH/RhoGEF and pleckstrin domain protein 2	-1.1940696338953762	1.1080387432946236e-7
834	ENSRNOG00000017077	Snx7	sorting nexin 7	-1.1938037853951369	3.360983692027006e-6
835	ENSRNOG00000014456	Coq10b	coenzyme Q10B	-1.193482299650387	1.023467814683868e-10
836	ENSRNOG00000004120	RGD1565844	similar to RIKEN cDNA 1700045I19	-1.193310432212832	0.03412950984629429
837	ENSRNOG00000009515	Pgm3	phosphoglucomutase 3	-1.1931099903039712	3.7027000561271945e-7
838	ENSRNOG00000064499	LOC100912209	uncharacterized LOC100912209	-1.1904119676367653	9.483848071186174e-4
839	ENSRNOG00000066314	Bean1	brain expressed, associated with NEDD4, 1	-1.1896399045231747	1.4543000793230564e-5
840	ENSRNOG00000010853	Chrna7	cholinergic receptor nicotinic alpha 7 subunit	-1.1884120231929851	0.008480772717895876
841	ENSRNOG00000011891	Atp6v1b2	ATPase H+ transporting V1 subunit B2	-1.1854629033171444	3.9623497720669237e-20
842	ENSRNOG00000009323	Fam214b	family with sequence similarity 214, member B	-1.1852625350771349	1.3759182132928016e-11
843	ENSRNOG00000000219	Ano10	anoctamin 10	-1.1845162797650155	3.412624823187025e-9
844	ENSRNOG00000042751	Mageb7	MAGE family member B7	-1.184070497672119	5.031133175392094e-4
845	ENSRNOG00000069274	LOC100910848	retinoic acid early-inducible protein 1-epsilon-like	-1.1838182866006268	2.034033133799294e-4
846	ENSRNOG00000005900	Slc2a6	solute carrier family 2 member 6	-1.1837839337896776	0.016533673587541955
847	ENSRNOG00000066977	LOC120094258	uncharacterized LOC120094258	-1.1836811471605462	0.011672695506588544
848	ENSRNOG00000023546	Hspb1	heat shock protein family B (small) member 1	-1.1829892682719578	0.0025265965498190946
849	ENSRNOG00000030245	Tango2	transport and golgi organization 2 homolog	-1.180524782267717	2.5117125935067298e-8
850	ENSRNOG00000010183	Gask1b	golgi associated kinase 1B	-1.1803741102519136	1.956557798880723e-5
851	ENSRNOG00000001830	Arntl2	aryl hydrocarbon receptor nuclear translocator-like 2	-1.1788493356466268	0.008581755743110842
852	ENSRNOG00000056728	G6pd	glucose-6-phosphate dehydrogenase	-1.178376873409214	3.9014554529995927e-7
853	ENSRNOG00000006800	Pgap4	post-GPI attachment to proteins GalNAc transferase 4	-1.178272269292171	2.896061637120121e-4
854	ENSRNOG00000016688	Ston1	stonin 1	-1.1782102358459106	1.1319835956613648e-7
855	ENSRNOG00000045686	Nfs1	NFS1 cysteine desulfurase	-1.1780753709978995	1.4901413249751569e-9
856	ENSRNOG00000045553	Proser2	proline and serine rich 2	-1.174963497233401	6.69325935246674e-13
857	ENSRNOG00000011302	Rab11a	RAB11a, member RAS oncogene family	-1.1748638762328825	2.0392798450643105e-8
858	ENSRNOG00000013238	Tmem14a	transmembrane protein 14A	-1.1748391125236495	3.04459359617505e-4
859	ENSRNOG00000020247	Cnih2	cornichon family AMPA receptor auxiliary protein 2	-1.174157147904723	0.019962280457582544
860	ENSRNOG00000007046	Cfap70	cilia and flagella associated protein 70	-1.1741365004862896	0.0030030564287962715
861	ENSRNOG00000010134	Acot2	acyl-CoA thioesterase 2	-1.172944636417232	2.978907288542411e-14
862	ENSRNOG00000006388	Pygl	glycogen phosphorylase L	-1.170970929774188	2.4939446357390562e-17
863	ENSRNOG00000003967	Vmp1	vacuole membrane protein 1	-1.170970070072588	2.4969171865014456e-9
864	ENSRNOG00000003063	Phka1	phosphorylase kinase regulatory subunit alpha 1	-1.1702546482996892	6.778500663199592e-10
865	ENSRNOG00000017291	Sord	sorbitol dehydrogenase	-1.1690515590349526	5.221398553238728e-7
866	ENSRNOG00000008936	Map3k6	mitogen-activated protein kinase kinase kinase 6	-1.167623644451944	9.08504221951322e-4
867	ENSRNOG00000026953	Gpr88	G-protein coupled receptor 88	-1.167299788023988	0.02345582469335869
868	ENSRNOG00000056325	Mocs2	molybdenum cofactor synthesis 2	-1.1666664041746249	2.2883829358412654e-10
869	ENSRNOG00000009311	Fstl3	follistatin like 3	-1.1658483267208437	2.7360543324675017e-4
870	ENSRNOG00000031789	Rangap1	RAN GTPase activating protein 1	-1.165084877444378	3.681591029817099e-8
871	ENSRNOG00000032596	RT1-T24-1	RT1 class I, locus T24, gene 1	-1.163945178402348	0.0042168252759656934
872	ENSRNOG00000062679	Akr1c13	aldo-keto reductase family 1, member C13	-1.1611211318471677	2.7189265221469564e-4
873	ENSRNOG00000064548	ENSRNOG00000064548	-	-1.1609550832157591	0.005406157767984428
874	ENSRNOG00000002832	Slc16a2	solute carrier family 16 member 2	-1.1602100809081002	1.9986981090517906e-7
875	ENSRNOG00000014691	Ric3	RIC3 acetylcholine receptor chaperone	-1.1589564126856886	6.64499607522304e-4
876	ENSRNOG00000017977	Smpd1	sphingomyelin phosphodiesterase 1	-1.15734926414567	1.0723652403403472e-6
877	ENSRNOG00000046639	Itgae	integrin subunit alpha E	-1.1568585148204895	4.3224028331029054e-7
878	ENSRNOG00000018282	Gda	guanine deaminase	-1.1564017018568933	8.147767766693224e-8
879	ENSRNOG00000066008	Pecam1	platelet and endothelial cell adhesion molecule 1	-1.1560515764996662	3.2791945610441106e-8
880	ENSRNOG00000039496	Plp2	proteolipid protein 2	-1.154192335442385	4.610845357624625e-6
881	ENSRNOG00000002730	Rgs5	regulator of G-protein signaling 5	-1.1535959543218974	7.350016671785199e-6
882	ENSRNOG00000019598	Vegfa	vascular endothelial growth factor A	-1.151576535710984	1.1342161105060544e-11
883	ENSRNOG00000018081	Lactb	lactamase, beta	-1.1504585819018625	1.6720460563458852e-9
884	ENSRNOG00000025823	Rbm46	RNA binding motif protein 46	-1.1500466882670461	5.773992699883727e-9
885	ENSRNOG00000026965	Tmem140	transmembrane protein 140	-1.1498323367627472	4.435369740741442e-9
886	ENSRNOG00000017406	Atrnl1	attractin like 1	-1.1486895300125441	9.65023049718582e-12
887	ENSRNOG00000019018	Plat	plasminogen activator, tissue type	-1.1483876486662166	0.004860394391369284
888	ENSRNOG00000051180	Chchd2	coiled-coil-helix-coiled-coil-helix domain containing 2	-1.1469150306869018	0.010090808252277272
889	ENSRNOG00000001156	Msi1	musashi RNA-binding protein 1	-1.14653224568019	3.672248247865481e-4
890	ENSRNOG00000007545	Angptl4	angiopoietin-like 4	-1.1459948136067541	0.005407734278624332
891	ENSRNOG00000061129	Psmd14	proteasome 26S subunit, non-ATPase 14	-1.1446586102978158	6.200861084385056e-4
892	ENSRNOG00000007687	Sema7a	semaphorin 7A (John Milton Hagen blood group)	-1.1431133648202167	5.684972275353475e-5
893	ENSRNOG00000019265	Pcdh12	protocadherin 12	-1.1429215996505764	2.5263408446808083e-7
894	ENSRNOG00000047023	Aldh1l1	aldehyde dehydrogenase 1 family, member L1	-1.14017445437089	1.1855488453544531e-5
895	ENSRNOG00000019357	Tax1bp3	Tax1 binding protein 3	-1.1397776058954059	1.4297395457924074e-6
896	ENSRNOG00000002372	Sgcd	sarcoglycan, delta	-1.1388748433544333	0.04419264450002137
897	ENSRNOG00000008492	Cfap45	cilia and flagella associated protein 45	-1.1379985795494216	0.018292510853094253
898	ENSRNOG00000033498	Cib1	calcium and integrin binding 1	-1.1375304090684908	5.704688495339461e-7
899	ENSRNOG00000020652	Tgfb1	transforming growth factor, beta 1	-1.1367935086281533	2.528462409494975e-6
900	ENSRNOG00000010868	Rims4	regulating synaptic membrane exocytosis 4	-1.1352274966980287	0.01893787703359549
901	ENSRNOG00000001726	Tmem44	transmembrane protein 44	-1.135090463480499	0.010213209845450037
902	ENSRNOG00000049034	Ptrh1	peptidyl-tRNA hydrolase 1 homolog	-1.1343816371784576	3.519103862518002e-8
903	ENSRNOG00000028649	Tox3	TOX high mobility group box family member 3	-1.1327682691457335	0.005678360927310817
904	ENSRNOG00000009381	Mapk6	mitogen-activated protein kinase 6	-1.1324069972900148	3.9549170624518676e-8
905	ENSRNOG00000015615	Tnfrsf11a	TNF receptor superfamily member 11A	-1.131475277242145	1.0264860342326277e-4
906	ENSRNOG00000056457	Gpd1	glycerol-3-phosphate dehydrogenase 1	-1.1284065935236025	5.667697680805969e-6
907	ENSRNOG00000028837	LOC120093525	myosin light chain 6B	-1.127605009156656	7.244256044340263e-4
908	ENSRNOG00000019559	Eaf1	ELL associated factor 1	-1.1270049370271207	6.213494541115165e-8
909	ENSRNOG00000011445	Nkain1	Sodium/potassium transporting ATPase interacting 1	-1.1253204002401986	0.03171398518691991
910	ENSRNOG00000011752	Sh3d19	SH3 domain containing 19	-1.125313664799627	1.023467814683868e-10
911	ENSRNOG00000003207	Fmnl1	formin-like 1	-1.1219057005124906	9.670884693578065e-5
912	ENSRNOG00000046891	Hk1	hexokinase 1	-1.1214541155533317	3.04538525297749e-6
913	ENSRNOG00000011156	Clstn3	calsyntenin 3	-1.1198057732741113	0.02558700501451363
914	ENSRNOG00000033192	Osmr	oncostatin M receptor	-1.1197561114513293	3.3681249837665616e-5
915	ENSRNOG00000029339	LOC100363268	rCG31129-like	-1.117683734257712	5.575292597261843e-7
916	ENSRNOG00000066958	ENSRNOG00000066958	-	-1.1164711710589026	1.1137755200501182e-7
917	ENSRNOG00000032991	Rufy4	RUN and FYVE domain containing 4	-1.1146634183595938	0.0448095466589514
918	ENSRNOG00000070694	ENSRNOG00000070694	-	-1.1146465801490368	0.003887729237985481
919	ENSRNOG00000004794	Rtn1	reticulon 1	-1.1145333120748753	0.024524218824855372
920	ENSRNOG00000055365	Edem1	ER degradation enhancing alpha-mannosidase like protein 1	-1.1143697451200996	7.3331547544362e-14
921	ENSRNOG00000065187	ENSRNOG00000065187	-	-1.1139805578230257	0.030402353835657005
922	ENSRNOG00000009683	Sdcbp	syndecan binding protein	-1.1138253538397827	1.032912107025882e-8
923	ENSRNOG00000031665	Ace2	angiotensin I converting enzyme 2	-1.1130758829067247	1.6980408951440073e-8
924	ENSRNOG00000016636	Lpin3	lipin 3	-1.1130132154152381	2.1695178693544973e-7
925	ENSRNOG00000004608	Pam16	presequence translocase associated motor 16	-1.1128680273155651	2.379550064330499e-7
926	ENSRNOG00000001242	Gstt3	glutathione S-transferase, theta 3	-1.1128196366596848	4.835941810282745e-9
927	ENSRNOG00000066884	LOC102550999	uncharacterized LOC102550999	-1.1125471932161322	0.01968157369504602
928	ENSRNOG00000021262	Slc23a2	solute carrier family 23 member 2	-1.112546507185273	2.9517500089538815e-4
929	ENSRNOG00000004168	Slc35e4	solute carrier family 35, member E4	-1.1120326900300708	5.221398553238728e-7
930	ENSRNOG00000024577	Gamt	guanidinoacetate N-methyltransferase	-1.1111442650605017	5.873342042498063e-4
931	ENSRNOG00000068224	ENSRNOG00000068224	-	-1.1105871638788833	4.504120370316005e-6
932	ENSRNOG00000002434	Tmem100	transmembrane protein 100	-1.110054686782678	5.164305987948994e-5
933	ENSRNOG00000009019	Slc6a6	solute carrier family 6 member 6	-1.1094109135208339	1.0284150492563991e-7
934	ENSRNOG00000063179	ENSRNOG00000063179	-	-1.1093220537066821	0.00436903829589796
935	ENSRNOG00000028703	Slc39a6	solute carrier family 39 member 6	-1.1091113814209168	8.613303535343215e-11
936	ENSRNOG00000070689	Tnfrsf22	tumor necrosis factor receptor superfamily, member 22	-1.1080915092955914	5.674994128493252e-6
937	ENSRNOG00000065998	ENSRNOG00000065998	-	-1.1057328321031488	2.5564475777123758e-5
938	ENSRNOG00000012183	Glrx	glutaredoxin	-1.1057162221685584	0.001142704188908069
939	ENSRNOG00000001436	Ywhag	tyrosine 3-monooxygenase/tryptophan 5-monooxygenase activation protein, gamma	-1.1029709629017184	3.768909665059859e-9
940	ENSRNOG00000023972	Col4a2	collagen type IV alpha 2 chain	-1.1014571888133453	5.667697680805969e-6
941	MSTRG.17017	MSTRG.17017	-	-1.1008364672335398	0.007227740497059904
942	ENSRNOG00000057058	Cd300a	Cd300a molecule	-1.0992192312791786	0.002905762020244121
943	ENSRNOG00000058436	LOC108348215	zinc finger protein 420-like	-1.0991082943133645	0.025606301146723846
944	ENSRNOG00000008934	Tmem65	transmembrane protein 65	-1.0985250038281194	2.528462409494975e-6
945	ENSRNOG00000001245	Pcbp3	poly(rC) binding protein 3	-1.0983659310825404	9.636835667641972e-8
946	ENSRNOG00000011973	Il7	interleukin 7	-1.097753626515636	0.022888058169869104
947	ENSRNOG00000011821	S100a4	S100 calcium-binding protein A4	-1.0975181102483489	9.07629923180791e-8
948	ENSRNOG00000007546	Asns	asparagine synthetase (glutamine-hydrolyzing)	-1.0962489617274234	1.4721061629955617e-4
949	ENSRNOG00000020339	Neurl1	neuralized E3 ubiquitin protein ligase 1	-1.0952714894827016	0.005462337486128051
950	ENSRNOG00000025991	Pex1	peroxisomal biogenesis factor 1	-1.090028788792708	2.5689707684687846e-11
951	ENSRNOG00000002506	Cdkl2	cyclin dependent kinase like 2	-1.0897262515398038	2.999531376179746e-4
952	ENSRNOG00000069875	LOC100361457	actin, gamma 1 propeptide-like	-1.0891171039053913	0.0019615747208767595
953	ENSRNOG00000008680	Loxl1	lysyl oxidase-like 1	-1.0879585270845675	0.002487895851387426
954	ENSRNOG00000069130	ENSRNOG00000069130	-	-1.0875614772450166	0.008896256470985435
955	ENSRNOG00000003370	Otc	ornithine transcarbamylase	-1.0874551263220036	0.024436345306951397
956	ENSRNOG00000014064	Ctsh	cathepsin H	-1.0867341867273612	1.4740655023473948e-7
957	ENSRNOG00000007964	Tp53inp1	tumor protein p53 inducible nuclear protein 1	-1.086597506871219	3.796031951701788e-6
958	ENSRNOG00000020705	Rnls	renalase, FAD-dependent amine oxidase	-1.0848813861660553	8.096317313963267e-5
959	ENSRNOG00000001621	C2cd2	C2 calcium-dependent domain containing 2	-1.0841392353030397	4.344163872482984e-6
960	ENSRNOG00000019920	Doc2a	double C2 domain alpha	-1.082937599331378	0.02889931988162449
961	ENSRNOG00000007512	Srp14	signal recognition particle 14	-1.0829317991621314	5.697171091128736e-9
962	ENSRNOG00000020546	Lipe	lipase E, hormone sensitive type	-1.0823025253807383	3.285305947747643e-9
963	ENSRNOG00000017523	H6pd	hexose-6-phosphate dehydrogenase (glucose 1-dehydrogenase)	-1.0788003422486796	4.0169079488349183e-10
964	ENSRNOG00000014338	Slc25a25	solute carrier family 25 member 25	-1.0778369297016452	2.737165741730409e-8
965	ENSRNOG00000052157	Nav3	neuron navigator 3	-1.0776105325454772	1.316297505088818e-5
966	ENSRNOG00000017431	RGD1304884	similar to RIKEN cDNA 6430548M08	-1.0761672695812057	3.473427603123536e-7
967	ENSRNOG00000033010	Akr1c12	aldo-keto reductase family 1, member C12	-1.0761264103051653	0.001737643430192617
968	ENSRNOG00000065713	Chchd2l1	coiled-coil-helix-coiled-coil-helix domain containing protein 2-like 1	-1.0749297413514958	6.40954307131758e-9
969	ENSRNOG00000016889	Fancc	FA complementation group C	-1.073773037505327	0.002383091697988925
970	ENSRNOG00000005371	Klhl29	kelch-like family member 29	-1.0733714571168913	7.871166672857952e-4
971	ENSRNOG00000064569	ENSRNOG00000064569	-	-1.072929781150593	0.0172434336542335
972	ENSRNOG00000014297	Sdc4	syndecan 4	-1.0728460218172484	1.229572130960714e-4
973	ENSRNOG00000016362	Gpr4	G protein-coupled receptor 4	-1.0708202261042314	2.072243643782224e-5
974	ENSRNOG00000061099	ENSRNOG00000061099	-	-1.07036075845183	0.007096530236359989
975	ENSRNOG00000005993	Oxsm	3-oxoacyl-ACP synthase, mitochondrial	-1.0701092499918723	3.60292262030091e-10
976	ENSRNOG00000020206	Ctsd	cathepsin D	-1.0697427923424963	5.409294359743944e-6
977	ENSRNOG00000017521	Gpr55	G protein-coupled receptor 55	-1.0690155863846829	0.04263268390306639
978	ENSRNOG00000018752	Clcf1	cardiotrophin-like cytokine factor 1	-1.0681967266255967	0.001856917017715164
979	ENSRNOG00000010378	Slc4a5	solute carrier family 4 member 5	-1.0677475703564534	0.04075676156938323
980	ENSRNOG00000005101	Mia2	MIA SH3 domain ER export factor 2	-1.0674738076190733	1.5126914163840644e-13
981	ENSRNOG00000020315	Taf13	TATA-box binding protein associated factor 13	-1.0671639046798547	7.063149531819153e-8
982	ENSRNOG00000012269	Lpcat3	lysophosphatidylcholine acyltransferase 3	-1.0659966122378932	2.6666375279787093e-7
983	ENSRNOG00000021062	Fxyd5	FXYD domain-containing ion transport regulator 5	-1.065835386563421	3.5415061588973924e-5
984	ENSRNOG00000037765	Lims1	LIM zinc finger domain containing 1	-1.0648885081754949	2.6796304414895475e-4
985	ENSRNOG00000017602	Il34	interleukin 34	-1.0633888602242296	0.0028981016321611105
986	ENSRNOG00000013747	Sh3bp2	SH3-domain binding protein 2	-1.062874228649345	1.022389271510864e-9
987	ENSRNOG00000021831	Kcnrg	potassium channel regulator	-1.062854459641921	0.04585768773719583
988	ENSRNOG00000003150	Mpc2	mitochondrial pyruvate carrier 2	-1.062481871090158	2.300896701489423e-10
989	ENSRNOG00000003858	Atp6ap2	ATPase H+ transporting accessory protein 2	-1.0622830686787967	7.088026360191647e-7
990	ENSRNOG00000059840	Unc5a	unc-5 netrin receptor A	-1.0612875033606624	0.0012823889492253248
991	ENSRNOG00000018279	Sfxn1	sideroflexin 1	-1.059160304143009	9.07629923180791e-8
992	ENSRNOG00000002474	Tom1l1	target of myb1 like 1 membrane trafficking protein	-1.0587226785946253	2.2902231057833598e-5
993	ENSRNOG00000042189	Rab31	RAB31, member RAS oncogene family	-1.0568587946492263	1.492422323192549e-5
994	ENSRNOG00000007369	Shisa4	shisa family member 4	-1.0567104238286262	4.263022265082564e-6
995	ENSRNOG00000009001	Mtss1	MTSS I-BAR domain containing 1	-1.0542121753130698	2.737584102969153e-14
996	ENSRNOG00000071119	ENSRNOG00000071119	-	-1.0515211047135447	4.5328164988925684e-7
997	ENSRNOG00000008565	Nkiras1	NFKB inhibitor interacting Ras-like 1	-1.0509005582370416	4.0359356330419233e-7
998	ENSRNOG00000010260	Dixdc1	DIX domain containing 1	-1.0500736437944451	4.613254186416321e-5
999	ENSRNOG00000057153	Pla1a	phospholipase A1 member A	-1.0487475848358316	3.0777819090208335e-4
1000	ENSRNOG00000020994	Slc25a39	solute carrier family 25, member 39	-1.0487013480534753	2.0500852682182616e-10
1001	ENSRNOG00000014303	Lrp11	LDL receptor related protein 11	-1.0480991659655632	7.068992778110078e-4
1002	ENSRNOG00000005130	Ogdh	oxoglutarate dehydrogenase	-1.047856667535419	2.8182897671581316e-19
1003	ENSRNOG00000050578	Rheb	Ras homolog, mTORC1 binding	-1.0476889381575316	2.3787311244832094e-7
1004	ENSRNOG00000025695	Tns3	tensin 3	-1.0470658812691902	1.0284150492563991e-7
1005	ENSRNOG00000007151	Cdk14	cyclin-dependent kinase 14	-1.0470236089077654	6.644969694178388e-7
1006	ENSRNOG00000014997	Igf2r	insulin-like growth factor 2 receptor	-1.047000123589526	4.8687840460150767e-14
1007	ENSRNOG00000060842	LOC120102087	small nucleolar SNORD12/SNORD106	-1.0469156404720885	0.03798009549035903
1008	ENSRNOG00000042419	Rex1bd	acylphosphatase 2	-1.0458890865410027	8.092230205343184e-6
1009	ENSRNOG00000028624	Kif26b	kinesin family member 26B	-1.0458453943645765	0.029806361550285553
1010	ENSRNOG00000025669	Tmem104	transmembrane protein 104	-1.0455861320045114	1.5159188781598997e-6
1011	ENSRNOG00000014698	Chrnb1	cholinergic receptor nicotinic beta 1 subunit	-1.0454685358044145	2.967052102745401e-4
1012	ENSRNOG00000003745	Atf3	activating transcription factor 3	-1.045350177388375	0.002291388585312222
1013	ENSRNOG00000024809	Ntmt1	N-terminal Xaa-Pro-Lys N-methyltransferase 1	-1.0451706041396078	9.552984480538755e-6
1014	ENSRNOG00000063594	ENSRNOG00000063594	-	-1.044586795723277	0.00313082585450576
1015	ENSRNOG00000008424	Aagab	alpha- and gamma-adaptin binding protein	-1.0445523589486674	1.2173612442718876e-13
1016	ENSRNOG00000009068	Phlda3	pleckstrin homology-like domain, family A, member 3	-1.0438732118609104	1.900913108151046e-10
1017	ENSRNOG00000008830	Nfe2l1	NFE2 like bZIP transcription factor 1	-1.0437995614124804	1.5881307735102617e-13
1018	ENSRNOG00000017945	Serf1	small EDRK-rich factor 1	-1.043428655302363	8.886984282984439e-4
1019	ENSRNOG00000055934	Dmkn	dermokine	-1.0428840445044238	4.491000145929459e-4
1020	ENSRNOG00000015865	Ap2s1	adaptor related protein complex 2 subunit sigma 1	-1.04236517430088	1.0724904669940777e-6
1021	ENSRNOG00000048187	Epop	elongin BC and polycomb repressive complex 2 associated protein	-1.0420755762450364	0.0036576240020172028
1022	ENSRNOG00000025360	Exd1	exonuclease 3'-5' domain containing 1	-1.041137306966225	0.037366972454630436
1023	ENSRNOG00000050794	Pdlim4	PDZ and LIM domain 4	-1.0403127264968117	1.790434709753234e-4
1024	ENSRNOG00000028380	Ccdc66	coiled-coil domain containing 66	-1.039764479542388	1.2424244912614491e-5
1025	ENSRNOG00000009832	Slc39a14	solute carrier family 39 member 14	-1.0397181841481955	6.891455514609546e-4
1026	ENSRNOG00000048250	Ldaf1	lipid droplet assembly factor 1	-1.039560946305991	6.056160934255559e-12
1027	ENSRNOG00000018812	Rpp25	ribonuclease P and MRP subunit p25	-1.0390298713585564	7.331402803814076e-5
1028	ENSRNOG00000001711	Plaat1	phospholipase A and acyltransferase 1	-1.038363204147886	0.0014663865591915343
1029	ENSRNOG00000061876	Iffo2	intermediate filament family orphan 2	-1.0373681700833226	1.538307291470416e-12
1030	ENSRNOG00000014230	Map1a	microtubule-associated protein 1A	-1.0373325782676024	2.755821842699333e-9
1031	ENSRNOG00000059857	Rnd1	Rho family GTPase 1	-1.0356964057125568	0.002164461988124029
1032	ENSRNOG00000068555	Nt5c1a	5'-nucleotidase, cytosolic IA	-1.03464823335134	0.029897863641980986
1033	ENSRNOG00000018456	LOC100911664	uncharacterized LOC100911664	-1.0344828712966416	1.8068268769205422e-4
1034	ENSRNOG00000051952	Tes	testin LIM domain protein	-1.0337969180412923	0.0011888059991881019
1035	ENSRNOG00000008226	Zbtb8os	zinc finger and BTB domain containing 8 opposite strand	-1.0328408251548529	1.5795441839936488e-7
1036	ENSRNOG00000010362	Anxa2	annexin A2	-1.0318982658456473	6.119128607614765e-4
1037	ENSRNOG00000007948	Nf2	NF2, moesin-ezrin-radixin like (MERLIN) tumor suppressor	-1.0316299058933707	1.737423362831649e-4
1038	ENSRNOG00000031706	RGD1563601	similar to Tpi1 protein	-1.0310651619000526	0.0022755754413287255
1039	ENSRNOG00000019990	Rex1bd	required for excision 1-B domain containing	-1.029185753971459	1.5191414969690785e-11
1040	ENSRNOG00000002949	Pgs1	phosphatidylglycerophosphate synthase 1	-1.0291779129461185	3.154164800248175e-9
1041	ENSRNOG00000016419	Pdlim5	PDZ and LIM domain 5	-1.0286683958022216	4.472410226667768e-5
1042	ENSRNOG00000006611	Nostrin	nitric oxide synthase trafficking	-1.0277294454880055	0.0012509490650671185
1043	ENSRNOG00000026646	Ndufs5	NADH:ubiquinone oxidoreductase subunit S5	-1.0274926664311237	2.5298597910410583e-6
1044	ENSRNOG00000008271	Fam91a1	family with sequence similarity 91, member A1	-1.0268051694090143	1.8056507905792116e-6
1045	ENSRNOG00000037402	ENSRNOG00000037402	-	-1.0261521912634215	7.350016671785199e-6
1046	ENSRNOG00000010549	Tspo	translocator protein	-1.0249431544962773	2.845257683030514e-5
1047	ENSRNOG00000025764	Mt1	metallothionein 1	-1.0246746056862155	0.011346701126396113
1048	ENSRNOG00000067239	Ppm1l	protein phosphatase, Mg2+/Mn2+ dependent, 1L	-1.0242650198519074	5.894229563588095e-10
1049	ENSRNOG00000048161	Tlr9	toll-like receptor 9	-1.0238807474494096	0.0017375637432030684
1050	ENSRNOG00000063706	ENSRNOG00000063706	-	-1.0215484104612684	0.011380969118487126
1051	ENSRNOG00000018109	Clic4	chloride intracellular channel 4	-1.020772801392937	3.2308635647260523e-6
1052	ENSRNOG00000012428	Maf	MAF bZIP transcription factor	-1.020050931254014	1.771568802091148e-5
1053	ENSRNOG00000049780	Sri	sorcin	-1.0199639809667445	1.2047729371052558e-6
1054	ENSRNOG00000022555	Msantd5	Myb/SANT DNA binding domain containing 5	-1.019916107026841	2.8877324213606803e-5
1055	ENSRNOG00000034191	Fmo1	flavin containing dimethylaniline monoxygenase 1	-1.0198851135777809	0.015532240988769973
1056	ENSRNOG00000004456	Clhc1	clathrin heavy chain linker domain containing 1	-1.0187479268971358	0.04642875091669431
1057	ENSRNOG00000057832	Rnf125	ring finger protein 125	-1.0178398243521056	2.3561247692172578e-4
1058	ENSRNOG00000007304	Herc3	HECT and RLD domain containing E3 ubiquitin protein ligase 3	-1.016744961520553	2.993087811416261e-7
1059	ENSRNOG00000003782	Acot9	acyl-CoA thioesterase 9	-1.0162375456485764	1.2228306082507455e-9
1060	ENSRNOG00000048812	Gpx1	glutathione peroxidase 1	-1.015935190760928	2.5473389304525465e-6
1061	ENSRNOG00000063843	ENSRNOG00000063843	-	-1.0154497112440044	0.03917079235369943
1062	ENSRNOG00000010951	Cmtm6	CKLF-like MARVEL transmembrane domain containing 6	-1.0147253404039311	2.1838576854501698e-9
1063	ENSRNOG00000003172	Serpinf1	serpin family F member 1	-1.0140776503729043	0.004466554388300398
1064	ENSRNOG00000016538	Itga8	integrin subunit alpha 8	-1.0140742354278887	3.388090512088105e-5
1065	ENSRNOG00000020317	Rab5if	RAB5 interacting factor	-1.0138707132802756	3.822329375700872e-10
1066	ENSRNOG00000021866	Bola3	bolA family member 3	-1.013466485666808	1.6394478179349742e-8
1067	ENSRNOG00000009296	Snapc1	small nuclear RNA activating complex, polypeptide 1	-1.0129085786022065	4.7459366480947923e-7
1068	ENSRNOG00000015857	Ctsa	cathepsin A	-1.012179330951807	7.631508192053478e-11
1069	ENSRNOG00000019129	Fcgbp	Fc gamma binding protein	-1.0103862243710404	0.006892151172521223
1070	ENSRNOG00000001391	Sdsl	serine dehydratase-like	-1.010160336545461	4.224165543630933e-5
1071	ENSRNOG00000012106	Dnaja4	DnaJ heat shock protein family (Hsp40) member A4	-1.0090066784548901	1.476523816390828e-9
1072	ENSRNOG00000001252	Chst12	carbohydrate sulfotransferase 12	-1.0089955921488691	1.512629337810668e-7
1073	ENSRNOG00000024578	Ttyh2	tweety family member 2	-1.0088103435016103	4.024923170392953e-6
1074	ENSRNOG00000025094	Gpr183	G protein-coupled receptor 183	-1.0083711130709307	0.02405288908218694
1075	ENSRNOG00000010213	Fgd5	FYVE, RhoGEF and PH domain containing 5	-1.0077240734156792	3.411515632216263e-5
1076	ENSRNOG00000059705	Elmo1	engulfment and cell motility 1	-1.0076683143627978	4.7639079999000024e-8
1077	ENSRNOG00000006997	App	amyloid beta precursor protein	-1.0072038599788573	2.1830139277797047e-6
1078	ENSRNOG00000018003	F2rl1	F2R like trypsin receptor 1	-1.0063604522030187	0.009118764063050382
1079	ENSRNOG00000021484	ENSRNOG00000021484	-	-1.0061125039742544	1.192240959216393e-8
1080	ENSRNOG00000016234	Ciapin1	cytokine induced apoptosis inhibitor 1	-1.0049472262064412	4.721579652759471e-11
1081	ENSRNOG00000012049	Sox7	SRY-box transcription factor 7	-1.0039532989701345	0.0024573049120053567
1082	ENSRNOG00000027924	Fam83g	family with sequence similarity 83, member G	-1.0007662721809572	0.0055462718047545505
1083	ENSRNOG00000036675	Btbd16	BTB domain containing 16	-1.0002306269800398	0.023978839036903718
1084	ENSRNOG00000007089	Lgmn	legumain	-1.000217910669305	1.0500295909397075e-12
1085	ENSRNOG00000029749	Pabpc4l	poly(A) binding protein, cytoplasmic 4-like	1.0019418418864277	3.6969036990364953e-4
1086	ENSRNOG00000059500	Cdkn1c	cyclin-dependent kinase inhibitor 1C	1.0021146823402791	1.8135606243721274e-4
1087	ENSRNOG00000011332	Clspn	claspin	1.0045988330586477	1.6163474068809112e-4
1088	ENSRNOG00000066080	ENSRNOG00000066080	-	1.0051220842244806	0.0065823236534651415
1089	ENSRNOG00000005515	Rhbdl3	rhomboid like 3	1.0059777174064966	0.0017072553020946227
1090	ENSRNOG00000027787	Cdc6	cell division cycle 6	1.0060763544177505	0.0019689603699057042
1091	ENSRNOG00000039582	Cspg4b	chondroitin sulfate proteoglycan 4B	1.007208945022321	1.78673207675561e-16
1092	ENSRNOG00000018937	Gstm7	glutathione S-transferase, mu 7	1.007375490562153	1.6351187505664693e-4
1093	ENSRNOG00000000658	Acacb	acetyl-CoA carboxylase beta	1.0074960125974628	4.408237999425853e-7
1094	ENSRNOG00000025423	Map3k13	mitogen-activated protein kinase kinase kinase 13	1.0078864720142302	0.009330001750304713
1095	ENSRNOG00000064826	ENSRNOG00000064826	-	1.0081386544854376	0.004725523102765084
1096	ENSRNOG00000003066	Wnt9a	Wnt family member 9A	1.0084314870809403	2.226943281743152e-5
1097	ENSRNOG00000060356	Kif15	kinesin family member 15	1.0087570187491934	4.3723440503262643e-7
1098	ENSRNOG00000027365	Hoxa4	homeo box A4	1.0087964611480493	0.03232893270089393
1099	ENSRNOG00000010607	Rnf208	ring finger protein 208	1.008830857471658	5.037285295025441e-7
1100	ENSRNOG00000021400	Magee2	MAGE family member E2	1.0092502404152242	1.920313858435635e-5
1101	ENSRNOG00000069541	ENSRNOG00000069541	-	1.0109916339249707	0.030663972468791458
1102	ENSRNOG00000005883	Nek10	NIMA-related kinase 10	1.0112664257788748	0.013530354556600418
1103	ENSRNOG00000020907	Zp1	zona pellucida glycoprotein 1	1.0113395646086936	0.004616598400050474
1104	ENSRNOG00000008697	Ccn3	cellular communication network factor 3	1.012139085149876	2.9032287331409175e-4
1105	ENSRNOG00000049215	Cbx2	chromobox 2	1.0132036018118593	1.977778804631637e-5
1106	ENSRNOG00000067691	ENSRNOG00000067691	-	1.013344789281551	3.6508899424336036e-6
1107	ENSRNOG00000014576	Dock3	dedicator of cyto-kinesis 3	1.0136640640537014	1.1287775424213088e-4
1108	ENSRNOG00000020687	Dpf1	double PHD fingers 1	1.013782881014878	1.4721881205754351e-8
1109	ENSRNOG00000002487	Mbnl3	muscleblind-like splicing regulator 3	1.0144730333526266	7.764675789754657e-5
1110	ENSRNOG00000015550	Ptgds	prostaglandin D2 synthase	1.0147114534290325	0.003887729237985481
1111	ENSRNOG00000024125	Slain1	SLAIN motif family, member 1	1.0153273002500296	6.322756052874081e-5
1112	ENSRNOG00000028733	Prkar1b	protein kinase cAMP-dependent type I regulatory subunit beta	1.0171216456184868	3.8651679097438e-5
1113	ENSRNOG00000010454	Ccno	cyclin O	1.017367675964701	0.0017925389361183397
1114	ENSRNOG00000012835	Espl1	extra spindle pole bodies like 1, separase	1.0175598169917053	4.4831714882911376e-7
1115	ENSRNOG00000060703	Troap	trophinin associated protein	1.0182894224761627	7.354948741778203e-8
1116	ENSRNOG00000021116	Bnipl	BCL2 interacting protein like	1.0188632332993046	6.685842538932578e-4
1117	ENSRNOG00000014336	Mcm5	minichromosome maintenance complex component 5	1.0193395303361157	2.4808470306579976e-8
1118	ENSRNOG00000007590	Eya1	EYA transcriptional coactivator and phosphatase 1	1.0195558603623947	0.03106684006145776
1119	ENSRNOG00000067105	ENSRNOG00000067105	-	1.0198320372029117	2.6070843051818974e-5
1120	ENSRNOG00000020701	Brca1	BRCA1, DNA repair associated	1.0213434905725682	8.547517872177204e-6
1121	ENSRNOG00000021029	Hamp	hepcidin antimicrobial peptide	1.0223531198084617	0.011509637807760362
1122	ENSRNOG00000047860	Plin5	perilipin 5	1.0227013410239751	0.0061803037916372
1123	ENSRNOG00000004084	Lratd1	LRAT domain containing 1	1.0233545504827903	0.004517055253733341
1124	ENSRNOG00000003348	Rasd1	ras related dexamethasone induced 1	1.0240133469690498	0.0212426447000098
1125	ENSRNOG00000024602	Plekha7	pleckstrin homology domain containing A7	1.0252503691596568	1.4370242967761077e-5
1126	ENSRNOG00000018454	Apoe	apolipoprotein E	1.0269608290709114	1.1605444704743337e-6
1127	ENSRNOG00000007301	Gdf9	growth differentiation factor 9	1.0279064849018489	0.0012518827124448726
1128	ENSRNOG00000042533	Accsl	1-aminocyclopropane-1-carboxylate synthase-like	1.0285300299712237	0.013337115842892
1129	ENSRNOG00000007483	Ccnf	cyclin F	1.030474673338938	1.527878352044147e-5
1130	ENSRNOG00000021067	Fxyd7	FXYD domain-containing ion transport regulator 7	1.0312081365369303	9.912148553509674e-5
1131	ENSRNOG00000055721	Rnf128	ring finger protein 128	1.0317635366804458	1.5650450838847423e-5
1132	ENSRNOG00000065346	ENSRNOG00000065346	-	1.0325551227546197	7.189524950226119e-6
1133	ENSRNOG00000026770	Tspy26	testis specific protein, Y-linked 26	1.0327843530727527	3.7266137855136385e-4
1134	ENSRNOG00000015796	Msh2	mutS homolog 2	1.0328154535031646	1.9876489154228041e-4
1135	ENSRNOG00000046132	ENSRNOG00000046132	-	1.0335135831981472	0.005704520475251701
1136	ENSRNOG00000062467	ENSRNOG00000062467	-	1.033662155486477	0.008135064729898087
1137	ENSRNOG00000025518	Carmil3	capping protein regulator and myosin 1 linker 3	1.0337221033300874	5.980226072344185e-6
1138	ENSRNOG00000067004	ENSRNOG00000067004	-	1.0341274284002095	0.030632307896958165
1139	ENSRNOG00000050163	LOC498300	similar to degenerative spermatocyte homolog	1.0343400775521014	0.046751431938554217
1140	ENSRNOG00000016995	Zap70	zeta chain of T cell receptor associated protein kinase 70	1.035328646475597	8.796178815397772e-7
1141	ENSRNOG00000016983	Myh7	myosin heavy chain 7	1.0361055030604631	0.036869296421055076
1142	ENSRNOG00000010320	Efnb3	ephrin B3	1.0371993193005125	0.001989355410533415
1143	ENSRNOG00000019100	Kif2c	kinesin family member 2C	1.0373364499041635	4.3856078101018926e-5
1144	ENSRNOG00000030449	Gsta4	glutathione S-transferase alpha 4	1.0373576819014056	2.3060722176908048e-7
1145	ENSRNOG00000014960	Bard1	BRCA1 associated RING domain 1	1.0381603823941443	1.5052459763835758e-4
1146	ENSRNOG00000065021	Naaladl2	N-acetylated alpha-linked acidic dipeptidase-like 2	1.039065563797474	0.005487980826801292
1147	ENSRNOG00000008026	C2cd4c	C2 calcium-dependent domain containing 4C	1.0395940540755568	6.469963256139489e-4
1148	ENSRNOG00000023847	Nlrp14	NLR family, pyrin domain containing 14	1.0401595733042432	0.008135064729898087
1149	ENSRNOG00000016734	Emilin3	elastin microfibril interfacer 3	1.042158728481473	0.003237821380673022
1150	ENSRNOG00000019416	Zfp61	zinc finger protein 61	1.0435426776618524	7.469072423822527e-4
1151	ENSRNOG00000068106	Tcap	titin-cap	1.0444587980888569	0.01699326636571692
1152	ENSRNOG00000055530	Panx2	pannexin 2	1.0450242118488735	3.683087878165019e-4
1153	ENSRNOG00000067290	LOC102555037	uncharacterized LOC102555037	1.0461243729526213	0.0017644274863200516
1154	ENSRNOG00000002524	Gpr37	G protein-coupled receptor 37	1.0463609444410276	0.010432904815628358
1155	ENSRNOG00000002537	Wnk3	WNK lysine deficient protein kinase 3	1.0469179600285627	0.0012697733309323957
1156	ENSRNOG00000013072	Plxna4	plexin A4	1.0482111305743802	4.2250204653743454e-23
1157	ENSRNOG00000021724	Ptprcap	protein tyrosine phosphatase, receptor type, C-associated protein	1.0482381541925947	5.096947363405445e-4
1158	ENSRNOG00000020440	Fads2	fatty acid desaturase 2	1.0504546741272398	3.790935350203992e-7
1159	ENSRNOG00000015746	Kcng4	potassium voltage-gated channel modifier subfamily G member 4	1.050659221661587	0.007361347227624061
1160	ENSRNOG00000053047	Top2a	DNA topoisomerase II alpha	1.0508666774393334	7.922391473678321e-9
1161	ENSRNOG00000047321	Hba-a3	hemoglobin alpha, adult chain 3	1.0515317566920825	0.0155827539360776
1162	ENSRNOG00000002303	Kcnj12	potassium inwardly-rectifying channel, subfamily J, member 12	1.0528502666488202	0.03163311678742252
1163	ENSRNOG00000020013	Psrc1	proline and serine rich coiled-coil 1	1.0538164836260457	1.2424244912614491e-5
1164	ENSRNOG00000011305	Sox10	SRY-box transcription factor 10	1.054720415276784	1.9246702313887944e-4
1165	ENSRNOG00000047692	Hells	helicase, lymphoid specific	1.0548799287859678	1.3078235225973365e-7
1166	ENSRNOG00000067752	ENSRNOG00000067752	-	1.0570738571546525	0.0038254777233679513
1167	ENSRNOG00000015945	Cd3g	CD3g molecule	1.0575497038634125	0.005971947875168573
1168	ENSRNOG00000062374	ENSRNOG00000062374	-	1.0577963108598767	0.02423768991134442
1169	ENSRNOG00000018167	Tmem221	transmembrane protein 221	1.0579829283053699	0.002537297583993184
1170	ENSRNOG00000062871	ENSRNOG00000062871	-	1.059174491409706	5.036267858177855e-8
1171	ENSRNOG00000036828	Pde1b	phosphodiesterase 1B	1.0596639731281994	1.3482940588877723e-8
1172	ENSRNOG00000024631	Chadl	chondroadherin-like	1.0596989958932461	3.5788996060351905e-4
1173	ENSRNOG00000008146	Tox2	TOX high mobility group box family member 2	1.0608942708664684	3.112066079967137e-5
1174	ENSRNOG00000021903	Atad5	ATPase family, AAA domain containing 5	1.0626283479440082	0.002920449766486043
1175	ENSRNOG00000022911	Hjurp	Holliday junction recognition protein	1.064430335945773	8.246466065093265e-8
1176	ENSRNOG00000030475	Pwwp3b	PWWP domain containing 3B	1.065509371290212	0.0053291280704065415
1177	ENSRNOG00000067849	Rtkn2	rhotekin 2	1.0678776557861218	0.033875384183134336
1178	ENSRNOG00000025480	Eif4e1b	eukaryotic translation initiation factor 4E family member 1B	1.0679932786088187	0.010375934300832565
1179	ENSRNOG00000029535	Nrbp2	nuclear receptor binding protein 2	1.070001819159554	1.4293743627858047e-6
1180	ENSRNOG00000048389	Fgf18	fibroblast growth factor 18	1.0709017134961951	0.004674409173891548
1181	ENSRNOG00000037211	Kif14	kinesin family member 14	1.0711673593942184	1.2051636733344091e-4
1182	ENSRNOG00000013397	Foxo1	forkhead box O1	1.0764332656266895	0.001142704188908069
1183	ENSRNOG00000007728	Gsdmd	gasdermin D	1.0773127709622052	7.635338550639904e-16
1184	ENSRNOG00000036897	Defb24	defensin beta 24	1.0773775027583163	0.0404399885022363
1185	ENSRNOG00000009503	Depdc1	DEP domain containing 1	1.0777131096721289	7.571292926066376e-5
1186	ENSRNOG00000027212	Tekt3	tektin 3	1.0780632972238482	0.0011808810990427464
1187	ENSRNOG00000012952	Lrig1	leucine-rich repeats and immunoglobulin-like domains 1	1.0781718988599123	2.3456841883533415e-7
1188	ENSRNOG00000016696	Angpt2	angiopoietin 2	1.0787576769768579	4.7375518066591443e-4
1189	ENSRNOG00000067595	ENSRNOG00000067595	-	1.0790185359936755	0.006144404900869461
1190	ENSRNOG00000063238	ENSRNOG00000063238	-	1.079288114277849	0.038883305821123905
1191	ENSRNOG00000012815	Chst10	carbohydrate sulfotransferase 10	1.081265767790647	0.0014968878725194546
1192	ENSRNOG00000067100	ENSRNOG00000067100	-	1.0813326739548792	0.03521362695197048
1193	ENSRNOG00000009855	Serpina5	serpin family A member 5	1.0835398955138205	0.028706693932121066
1194	ENSRNOG00000068605	ENSRNOG00000068605	-	1.0836170091153705	1.978503843212262e-9
1195	ENSRNOG00000048256	Fhip1a	FHF complex subunit HOOK interacting protein 1A	1.0838462925398078	6.190278143182236e-4
1196	ENSRNOG00000001111	Brca2	BRCA2, DNA repair associated	1.0845275418249851	2.6095643199857362e-5
1197	ENSRNOG00000003726	Scml2	Scm polycomb group protein like 2	1.0845993482097152	1.6457638096991117e-5
1198	ENSRNOG00000069483	ENSRNOG00000069483	-	1.0851811214457896	0.046611290312510406
1199	ENSRNOG00000004195	Dtl	denticleless E3 ubiquitin protein ligase homolog	1.0869987559509922	0.0013753734931932066
1200	ENSRNOG00000007012	Ly75	lymphocyte antigen 75	1.0870570431036835	0.005621141875667573
1201	ENSRNOG00000069697	Gsto2	glutathione S-transferase omega 2	1.0873001140909928	5.3120185050322796e-5
1202	ENSRNOG00000006860	Itk	IL2-inducible T-cell kinase	1.0877015385406996	4.255435655649341e-4
1203	ENSRNOG00000057769	Oas1h	2 ' -5 ' oligoadenylate synthetase 1H	1.0878976979896626	0.018231904388569812
1204	ENSRNOG00000015717	Ptpre	protein tyrosine phosphatase, receptor type, E	1.088555514523272	6.1057804767482e-5
1205	ENSRNOG00000054474	Mastl	microtubule associated serine/threonine kinase-like	1.0893939355122568	4.178399424619797e-5
1206	ENSRNOG00000063348	ENSRNOG00000063348	-	1.0903046056354564	0.007028310524486513
1207	ENSRNOG00000048088	Mest	mesoderm specific transcript	1.0905039796272635	0.010930627614297207
1208	ENSRNOG00000004208	Crim1	cysteine rich transmembrane BMP regulator 1	1.0912367663685312	1.1543688735069662e-5
1209	ENSRNOG00000004744	Lratd2	LRAT domain containing 2	1.0917225122528917	0.0044013186568864805
1210	ENSRNOG00000001439	Srrm3	serine/arginine repetitive matrix 3	1.092077550494479	1.394034752814111e-6
1211	ENSRNOG00000028856	Pknox2	PBX/knotted 1 homeobox 2	1.0928768266044435	2.3972486156819983e-6
1212	ENSRNOG00000002471	Polq	DNA polymerase theta	1.0929999783079762	8.258606651362483e-5
1213	ENSRNOG00000005726	Pclo	piccolo (presynaptic cytomatrix protein)	1.0933636850637765	0.015769920679487535
1214	ENSRNOG00000071185	ENSRNOG00000071185	-	1.0946879437646166	7.637204204164703e-4
1215	ENSRNOG00000012742	Irx2	iroquois homeobox 2	1.0947277340098154	8.813856609840414e-8
1216	ENSRNOG00000002592	Rps6ka6	ribosomal protein S6 kinase A6	1.095509622832675	1.4181611099813752e-6
1217	ENSRNOG00000024178	Cenpt	centromere protein T	1.0962175713462292	2.1544219838547965e-7
1218	ENSRNOG00000016302	Cnnm1	cyclin and CBS domain divalent metal cation transport mediator 1	1.0963098416792734	0.03432535095725195
1219	ENSRNOG00000058983	Gata5	GATA binding protein 5	1.101059947645099	0.004159236462145796
1220	ENSRNOG00000061215	Crym	crystallin, mu	1.1020413485430616	0.006142453713326914
1221	ENSRNOG00000031726	Oas1e	2'-5' oligoadenylate synthetase 1E	1.1037704344913717	0.007078305483852936
1222	ENSRNOG00000005670	Art4	ADP-ribosyltransferase 4	1.1056273092661235	0.007895858542466152
1223	ENSRNOG00000013213	Epha4	Eph receptor A4	1.1056798538643529	2.6291785661099606e-8
1224	ENSRNOG00000066042	Abcb1b	ATP-binding cassette, subfamily B (MDR/TAP), member 1B	1.1060369395048202	0.006566285543783794
1225	ENSRNOG00000009308	Bcl2l10	BCL2 like 10	1.1062550459155618	0.017723471191479833
1226	ENSRNOG00000010270	Espn	espin	1.1069067116751297	7.944452103669592e-5
1227	ENSRNOG00000038055	Slc47a2	solute carrier family 47 member 2	1.1069261339462249	4.4182703239929765e-4
1228	ENSRNOG00000026271	Tmem245	transmembrane protein 245	1.1069607869527085	4.716466516541362e-4
1229	ENSRNOG00000068162	Npas3	neuronal PAS domain protein 3	1.1069652249096504	0.003239261317520259
1230	ENSRNOG00000013907	Sall1	spalt-like transcription factor 1	1.1073495317448332	4.557189175285966e-7
1231	ENSRNOG00000018267	B3gnt7	UDP-GlcNAc:betaGal beta-1,3-N-acetylglucosaminyltransferase 7	1.1077091291101775	2.516448762533371e-8
1232	ENSRNOG00000007989	Chst1	carbohydrate sulfotransferase 1	1.107757301843063	0.005044397798955854
1233	ENSRNOG00000011526	Pcsk6	proprotein convertase subtilisin/kexin type 6	1.1088171274278382	4.7185850495016005e-6
1234	ENSRNOG00000047476	Wasf1	WASP family member 1	1.1109245309727944	0.0017312236683590216
1235	ENSRNOG00000003616	Grem2	gremlin 2, DAN family BMP antagonist	1.1110708581012099	0.001662193086783829
1236	ENSRNOG00000043419	Hist3h2ba	histone cluster 3, H2ba	1.1111637057417079	2.2109745282583565e-4
1237	ENSRNOG00000023881	Skap1	src kinase associated phosphoprotein 1	1.1116196637351043	0.009994206296705286
1238	ENSRNOG00000007865	Ephb1	Eph receptor B1	1.1118110154198462	0.0025953090894979647
1239	ENSRNOG00000063517	Rflna	refilin A	1.1119135546379053	0.030394606475645358
1240	ENSRNOG00000010634	Megf11	multiple EGF-like-domains 11	1.1139223780211516	0.004799591607254607
1241	ENSRNOG00000016872	Plppr4	phospholipid phosphatase related 4	1.1149302527302027	0.017889872852952717
1242	ENSRNOG00000001259	Cux2	cut-like homeobox 2	1.115572662073377	5.0577080221597e-5
1243	ENSRNOG00000058940	Rab11fip1	RAB11 family interacting protein 1	1.1182361084866506	2.222533711788291e-4
1244	ENSRNOG00000021027	Dbp	D-box binding PAR bZIP transcription factor	1.1183572943510625	1.1517907409417405e-4
1245	ENSRNOG00000001389	Irs3	insulin receptor substrate 3	1.118614898162912	2.1877733229984532e-4
1246	ENSRNOG00000026432	Syt7	synaptotagmin 7	1.1203429409960683	0.034316819939039546
1247	ENSRNOG00000015991	Npr2	natriuretic peptide receptor 2	1.120627825554036	6.127313225062694e-16
1248	ENSRNOG00000023812	Raver2	ribonucleoprotein, PTB-binding 2	1.1214381576063963	2.97718260443053e-8
1249	ENSRNOG00000024245	Zkscan2	zinc finger with KRAB and SCAN domains 2	1.122147919380691	0.013548922622138549
1250	ENSRNOG00000026870	Clic6	chloride intracellular channel 6	1.1222269460611036	0.034601623117208255
1251	ENSRNOG00000066588	ENSRNOG00000066588	-	1.1231604232689878	0.03269526505269357
1252	ENSRNOG00000016603	Rtn2	reticulon 2	1.1245166314953121	8.05424247135392e-4
1253	ENSRNOG00000030788	Olr35	olfactory receptor 35	1.1247113391968693	0.008810864534944736
1254	ENSRNOG00000054460	Khdc3	KH domain containing 3, subcortical maternal complex member	1.1263542187310418	0.0208652492252311
1255	ENSRNOG00000012735	Kif24	kinesin family member 24	1.1273047159101877	0.0027511094268582005
1256	ENSRNOG00000009951	Aif1l	allograft inflammatory factor 1-like	1.127617158404473	0.003944780516842376
1257	ENSRNOG00000001219	Tspear	thrombospondin-type laminin G domain and EAR repeats	1.1286416915934414	0.006346897263742611
1258	ENSRNOG00000030522	LOC500331	similar to osteoclast inhibitory lectin	1.1291829737461008	0.001356775407931363
1259	ENSRNOG00000017808	Klf15	Kruppel-like factor 15	1.129377932951792	2.264526308798278e-18
1260	ENSRNOG00000068505	Insl3	insulin-like 3	1.130624838230823	0.01814691165327326
1261	ENSRNOG00000069925	Adal	adenosine deaminase-like	1.1319129491038709	1.5887026171986055e-7
1262	ENSRNOG00000038197	Cd226	CD226 molecule	1.1323831134592797	0.001416184450933767
1263	ENSRNOG00000003709	Kmo	kynurenine 3-monooxygenase	1.1357499121013948	0.012172681968655199
1264	ENSRNOG00000025251	H1f8	H1.8 linker histone	1.136210867621138	0.007268853332546586
1265	ENSRNOG00000031211	Acsm5	acyl-CoA synthetase medium-chain family member 5	1.1366500293418282	7.104250613710592e-4
1266	ENSRNOG00000014426	Lox	lysyl oxidase	1.1375199890276517	3.5312120327457348e-6
1267	ENSRNOG00000063209	ENSRNOG00000063209	-	1.1377059403495895	4.615968261692828e-4
1268	ENSRNOG00000018764	B3gnt3	UDP-GlcNAc:betaGal beta-1,3-N-acetylglucosaminyltransferase 3	1.1389920733389545	0.018590283688114315
1269	ENSRNOG00000010098	Plek2	pleckstrin 2	1.143033317558316	0.04223389138077935
1270	ENSRNOG00000007410	Dab1	DAB adaptor protein 1	1.144146125757685	0.016817544157073542
1271	ENSRNOG00000028344	Mmp11	matrix metallopeptidase 11	1.1448420205032834	3.3750898290743506e-8
1272	ENSRNOG00000055103	Cftr	CF transmembrane conductance regulator	1.1458299726956853	0.04178351770617009
1273	ENSRNOG00000010840	Adamtsl3	ADAMTS-like 3	1.146515707188628	1.0309843429748588e-4
1274	ENSRNOG00000064366	ENSRNOG00000064366	-	1.1491545616205292	0.019556611658832778
1275	ENSRNOG00000066031	ENSRNOG00000066031	-	1.1499910952872008	0.0030918734539717094
1276	ENSRNOG00000013123	Scube2	signal peptide, CUB domain and EGF like domain containing 2	1.1502004162218102	0.0017473861267809979
1277	ENSRNOG00000060843	ENSRNOG00000060843	-	1.1508668887005977	0.0026909813127647866
1278	ENSRNOG00000019377	Amh	anti-Mullerian hormone	1.1509009797081151	0.003594415717017787
1279	ENSRNOG00000062746	ENSRNOG00000062746	-	1.1510776358464265	0.002181880720222486
1280	ENSRNOG00000063760	ENSRNOG00000063760	-	1.1514623410509517	0.0018544282836670317
1281	ENSRNOG00000002053	Fras1	Fraser extracellular matrix complex subunit 1	1.1516274927428112	1.1095513907646843e-13
1282	ENSRNOG00000016997	Bnip5	BCL2 interacting protein 5	1.1528428854003978	0.006944676716226718
1283	ENSRNOG00000062806	Bex4	brain expressed, X-linked 4	1.1550289403723908	4.774338486549565e-7
1284	ENSRNOG00000063993	ENSRNOG00000063993	-	1.155544424219337	5.049594126385713e-6
1285	ENSRNOG00000065376	ENSRNOG00000065376	-	1.1575743691836395	0.0010651454917295965
1286	ENSRNOG00000007206	Cfap20dc	CFAP20 domain containing	1.157766792723693	0.0018899265453996318
1287	ENSRNOG00000014712	Zfp39	zinc finger protein 39	1.1584054895528497	1.1670222124990427e-5
1288	ENSRNOG00000005472	Sp4	Sp4 transcription factor	1.1587159016511395	4.7639079999000024e-8
1289	ENSRNOG00000015520	Ticrr	TOPBP1-interacting checkpoint and replication regulator	1.1591107839934596	1.2064524230127955e-4
1290	ENSRNOG00000067151	ENSRNOG00000067151	-	1.1595785401006673	6.171796386076577e-4
1291	ENSRNOG00000012862	Spsb4	splA/ryanodine receptor domain and SOCS box containing 4	1.1609324990674494	1.294752531579758e-4
1292	ENSRNOG00000042753	Fgf13	fibroblast growth factor 13	1.1609667382187907	0.011377047797341248
1293	ENSRNOG00000066520	ENSRNOG00000066520	-	1.1611167235029525	0.02675552087008
1294	ENSRNOG00000021553	Nckap5	NCK-associated protein 5	1.1621609470261063	0.04802667721146507
1295	ENSRNOG00000003543	Gpr143	G protein-coupled receptor 143	1.1622102700516368	0.012268225084413428
1296	ENSRNOG00000067835	ENSRNOG00000067835	-	1.1638672224287956	4.3802606671714927e-7
1297	ENSRNOG00000011994	Perp	p53 apoptosis effector related to PMP22	1.165981522292747	0.007582166050941428
1298	ENSRNOG00000067479	Hlf	HLF transcription factor, PAR bZIP family member	1.166582479828512	1.5277123061915574e-5
1299	ENSRNOG00000069312	ENSRNOG00000069312	-	1.166914488892639	0.00407660153845119
1300	ENSRNOG00000020424	Plpp4	phospholipid phosphatase 4	1.167199647211389	0.007724522190017244
1301	ENSRNOG00000026936	Mpig6b	megakaryocyte and platelet inhibitory receptor G6b	1.168698349835743	1.876895637814243e-5
1302	ENSRNOG00000027869	Sox5	SRY-box transcription factor 5	1.1689339824725993	1.835421438114129e-8
1303	ENSRNOG00000007713	Tmcc3	transmembrane and coiled-coil domain family 3	1.169585491666193	2.2791777617457933e-6
1304	ENSRNOG00000055042	Gprin2	G protein regulated inducer of neurite outgrowth 2	1.1698272451227267	0.018337304003565084
1305	ENSRNOG00000016543	Trim63	tripartite motif containing 63	1.1699675986334193	0.010972383456366733
1306	ENSRNOG00000032180	Ccdc15	coiled-coil domain containing 15	1.1704493143123058	0.00813052125900829
1307	ENSRNOG00000007049	Bcl11a	BAF chromatin remodeling complex subunit BCL11A	1.171053203335703	0.001921088156598368
1308	ENSRNOG00000064399	LOC120094123	uncharacterized LOC120094123	1.17198692802881	2.8476688075891167e-13
1309	ENSRNOG00000015994	Cd3d	CD3d molecule	1.1731313539338293	9.337243192047204e-4
1310	ENSRNOG00000013982	Hsd17b2	hydroxysteroid (17-beta) dehydrogenase 2	1.1746393324328943	2.7641033543149935e-4
1311	ENSRNOG00000002345	Rasgef1b	RasGEF domain family, member 1B	1.17483163572096	6.844797790136518e-4
1312	ENSRNOG00000005392	Ngfr	nerve growth factor receptor	1.175934993243533	7.120993482572518e-6
1313	ENSRNOG00000016671	Dtna	dystrobrevin, alpha	1.1770503126220435	6.798132237603075e-6
1314	ENSRNOG00000053687	Znf660	zinc finger protein 660	1.1779435173878394	2.6333556122338537e-7
1315	ENSRNOG00000025498	Crb2	crumbs cell polarity complex component 2	1.1782946043525633	0.0012387954161854984
1316	ENSRNOG00000024190	Rasef	RAS and EF hand domain containing	1.1782954463118926	0.004072519881406286
1317	ENSRNOG00000031093	Mov10l1	Mov10 like RISC complex RNA helicase 1	1.178838942540132	0.009994206296705286
1318	ENSRNOG00000066189	ENSRNOG00000066189	-	1.1796047293640595	0.033750982445594324
1319	ENSRNOG00000001277	ENSRNOG00000001277	-	1.180561653225203	5.170630261810699e-4
1320	ENSRNOG00000008054	Igsf9	immunoglobulin superfamily, member 9	1.1817228188796227	1.3780372067942613e-5
1321	ENSRNOG00000006831	Pgr	progesterone receptor	1.1875262889505809	0.01318697671282853
1322	ENSRNOG00000014312	ENSRNOG00000014312	-	1.188676758010851	1.2186101858129326e-5
1323	ENSRNOG00000012609	Trdn	triadin	1.191201835172272	0.02099448516073202
1324	ENSRNOG00000016196	Dlgap1	DLG associated protein 1	1.1915072349976887	4.3140451623470016e-7
1325	ENSRNOG00000005348	Pamr1	peptidase domain containing associated with muscle regeneration 1	1.1927268577058485	7.897495019840828e-5
1326	ENSRNOG00000051837	Nwd2	NACHT and WD repeat domain containing 2	1.1929683208749369	0.004408098534317537
1327	ENSRNOG00000028015	Pf4	platelet factor 4	1.1933555386810348	2.96263050934036e-4
1328	ENSRNOG00000018938	Mkx	mohawk homeobox	1.1935868165965258	2.495958277121664e-5
1329	ENSRNOG00000010516	Plau	plasminogen activator, urokinase	1.1936376561123951	5.583353124579733e-10
1330	ENSRNOG00000015829	Trpm1	transient receptor potential cation channel, subfamily M, member 1	1.1939999506602246	0.0019342881227243276
1331	ENSRNOG00000005985	Kcnma1	potassium calcium-activated channel subfamily M alpha 1	1.1944600373496346	4.243005071089671e-5
1332	ENSRNOG00000018413	Per3	period circadian regulator 3	1.1950536658905102	0.0011074281577816017
1333	ENSRNOG00000066660	ENSRNOG00000066660	-	1.195088315058423	0.0011805282403726251
1334	ENSRNOG00000065330	Mrgpre	MAS related GPR family member E	1.1954474894136462	0.012293420788072882
1335	ENSRNOG00000023008	Fam131c	family with sequence similarity 131, member C	1.1957498045310957	0.005756387134426345
1336	ENSRNOG00000057501	Fam81a	family with sequence similarity 81, member A	1.197412272227242	0.033875384183134336
1337	ENSRNOG00000007200	Ikzf3	IKAROS family zinc finger 3	1.1975548499570223	0.003305192860163951
1338	ENSRNOG00000018268	Hhip	Hedgehog-interacting protein	1.198750386430622	0.033897939465112735
1339	ENSRNOG00000057458	Oip5	Opa interacting protein 5	1.2000484071751965	2.48534287137413e-7
1340	ENSRNOG00000023312	Lonrf2	LON peptidase N-terminal domain and ring finger 2	1.20058607590414	0.04776000040047101
1341	ENSRNOG00000025720	Nobox	NOBOX oogenesis homeobox	1.2014946339156072	0.036100174105920015
1342	ENSRNOG00000053675	Dhh	desert hedgehog signaling molecule	1.2048182843366557	2.1980811149500988e-5
1343	MSTRG.1333	MSTRG.1333	-	1.2048532639834755	0.006200494420762828
1344	ENSRNOG00000006911	Sptb	spectrin, beta, erythrocytic	1.2052132433914615	0.013427337152152437
1345	ENSRNOG00000006110	Jph1	junctophilin 1	1.2074635018673414	0.0020355530570566605
1346	ENSRNOG00000019857	Gng7	G protein subunit gamma 7	1.208414230063933	0.0010599481651565245
1347	ENSRNOG00000014465	Oca2	OCA2 melanosomal transmembrane protein	1.2093774811557665	0.0015225540275201448
1348	ENSRNOG00000026067	Wfdc10a	WAP four-disulfide core domain 10A	1.2102849651038625	4.25285062498024e-4
1349	ENSRNOG00000062383	Dio2	iodothyronine deiodinase 2	1.210557896644662	1.1793554009714791e-5
1350	ENSRNOG00000064438	ENSRNOG00000064438	-	1.211991582280481	0.0020756558175766084
1351	ENSRNOG00000018615	Cenph	centromere protein H	1.2126613159236084	1.2677755148808544e-6
1352	ENSRNOG00000069423	ENSRNOG00000069423	-	1.214173522815626	1.2199162576711917e-10
1353	ENSRNOG00000067408	ENSRNOG00000067408	-	1.2155748741903354	0.0341431349433856
1354	ENSRNOG00000002028	Tmem50b	transmembrane protein 50B	1.216840480624161	7.082468724334303e-5
1355	ENSRNOG00000052634	Lsmem2	leucine-rich single-pass membrane protein 2	1.2203225264352462	0.0010506124879856836
1356	ENSRNOG00000025290	Map3k15	mitogen-activated protein kinase kinase kinase 15	1.2220299654955527	2.3364126632618044e-6
1357	ENSRNOG00000064007	ENSRNOG00000064007	-	1.2237991127127426	1.1134742028209397e-4
1358	ENSRNOG00000070639	ENSRNOG00000070639	-	1.2240374973171808	0.02794715622133147
1359	ENSRNOG00000061731	Plxnb3	plexin B3	1.226553833362348	1.005055655274267e-4
1360	ENSRNOG00000026252	E2f7	E2F transcription factor 7	1.2272416039548022	3.251797464076425e-5
1361	ENSRNOG00000017893	Baiap3	BAI1-associated protein 3	1.2277794556379802	1.821114850576707e-14
1362	ENSRNOG00000025233	Tcl1a	Tcl1 family Akt coactivator A	1.2283318650049706	0.006960204214375915
1363	ENSRNOG00000006319	Cxcr6	C-X-C motif chemokine receptor 6	1.228829541899549	9.404236845739278e-4
1364	ENSRNOG00000004585	Tmtc2	transmembrane O-mannosyltransferase targeting cadherins 2	1.229879772141349	2.3277987126313858e-4
1365	ENSRNOG00000016684	Wnk2	WNK lysine deficient protein kinase 2	1.2306335540802755	0.001270549337074483
1366	ENSRNOG00000016675	Kcnn2	potassium calcium-activated channel subfamily N member 2	1.2373866270074083	1.3767378970630116e-4
1367	ENSRNOG00000025151	Ildr2	immunoglobulin-like domain containing receptor 2	1.2376663228531442	1.0237672821353416e-11
1368	ENSRNOG00000068425	Zfp551	zinc finger protein 551	1.2377863654949584	0.001204441126706089
1369	ENSRNOG00000031593	Nanos3	nanos C2HC-type zinc finger 3	1.2378281434911083	0.03195948607839169
1370	ENSRNOG00000018311	Cd19	CD19 molecule	1.2382159326961808	0.014201846432300186
1371	ENSRNOG00000031287	Cacna2d3	calcium voltage-gated channel auxiliary subunit alpha2delta 3	1.2401708478649596	6.064858173338227e-8
1372	ENSRNOG00000004795	Pof1b	POF1B, actin binding protein	1.2414510958418314	3.9679286415955043e-4
1373	ENSRNOG00000067235	ENSRNOG00000067235	-	1.2427161323986582	0.016620136366599557
1374	ENSRNOG00000022335	Rad21l1	RAD21 cohesin complex component like 1	1.2461261432695865	0.024618233382778708
1375	ENSRNOG00000016069	Cd3e	CD3e molecule	1.2466066093007044	3.012250837540329e-6
1376	ENSRNOG00000017409	Wnt6	Wnt family member 6	1.2483094767922789	7.857213827229373e-5
1377	ENSRNOG00000002331	Aldh3a1	aldehyde dehydrogenase 3 family, member A1	1.2487292058503392	0.027273963598254847
1378	ENSRNOG00000005776	Bcl11b	BAF chromatin remodeling complex subunit BCL11B	1.2487456019698056	2.6346391246142615e-4
1379	ENSRNOG00000009079	Prkar2b	protein kinase cAMP-dependent type II regulatory subunit beta	1.2497115665942526	5.581748309431188e-6
1380	ENSRNOG00000062678	H19	H19, imprinted maternally expressed transcript (non-protein coding)	1.2512280211028985	0.018787403229617413
1381	ENSRNOG00000042460	Hmga2	high mobility group AT-hook 2	1.2523902938217837	0.04215607080953014
1382	ENSRNOG00000060401	Dusp13	dual specificity phosphatase 13	1.252595581382836	0.03521362695197048
1383	ENSRNOG00000028622	Pnpla1	patatin-like phospholipase domain containing 1	1.2530522953351393	0.015479186276983666
1384	ENSRNOG00000033528	Tll1	tolloid-like 1	1.2541721742580196	5.56819490398264e-4
1385	ENSRNOG00000024462	Oas1d	2'-5' oligoadenylate synthetase 1D	1.257305133026632	0.004823745507579213
1386	ENSRNOG00000037080	Adamts17	ADAM metallopeptidase with thrombospondin type 1 motif, 17	1.2589083432596433	4.25285062498024e-4
1387	ENSRNOG00000018830	Aff3	AF4/FMR2 family, member 3	1.2604842183508247	6.111025558778088e-5
1388	ENSRNOG00000056446	Endou	endonuclease, poly(U)-specific	1.2618056013043752	3.5834896118463154e-4
1389	ENSRNOG00000005573	Ntn4	netrin 4	1.2630838787989849	2.522919242297262e-7
1390	ENSRNOG00000017064	Tdrd1	tudor domain containing 1	1.26324723778213	0.0019551614947149695
1391	ENSRNOG00000012280	Ptx3	pentraxin 3	1.2639088719824532	7.692774483271362e-4
1392	ENSRNOG00000023030	Cd96	CD96 molecule	1.2641400262351126	2.3608513778875226e-5
1393	ENSRNOG00000001864	Tmem191c	transmembrane protein 191C	1.2686198254009546	0.02675670853734783
1394	ENSRNOG00000016706	Fanca	FA complementation group A	1.2704083858200284	2.5447060132938805e-5
1395	ENSRNOG00000017206	Igfbp5	insulin-like growth factor binding protein 5	1.270451919519216	5.133065858629016e-6
1396	ENSRNOG00000059073	Slamf1	signaling lymphocytic activation molecule family member 1	1.2719818091836972	0.039334874773731404
1397	ENSRNOG00000004110	Trib2	tribbles pseudokinase 2	1.2726143595273816	0.041411519855041386
1398	ENSRNOG00000005343	Esr2	estrogen receptor 2	1.2761243500708288	1.0984978651680516e-5
1399	ENSRNOG00000047450	Lmo3	LIM domain only 3	1.276557600298258	0.00212377698519595
1400	ENSRNOG00000025551	Rgs22	regulator of G-protein signaling 22	1.2774664195888847	0.019547067585276263
1401	ENSRNOG00000059428	LOC100125366	40S ribosomal protein S2	1.277588969213631	8.710585792911489e-4
1402	ENSRNOG00000004473	Ppargc1a	PPARG coactivator 1 alpha	1.28013313619521	1.7952524407367524e-4
1403	ENSRNOG00000056697	Kcnab1	potassium voltage-gated channel subfamily A regulatory beta subunit 1	1.28026203098343	4.344163872482984e-6
1404	ENSRNOG00000019770	Bnc1	basonuclin 1	1.2815850174847907	2.91596739295729e-8
1405	ENSRNOG00000031493	Ascl4	achaete-scute family bHLH transcription factor 4	1.2819017981292051	0.03988329930125134
1406	ENSRNOG00000019065	Zfp385b	zinc finger protein 385B	1.2819373690935298	2.5874821239163636e-7
1407	ENSRNOG00000069240	ENSRNOG00000069240	-	1.2827362229139803	0.04135369720494013
1408	ENSRNOG00000006237	Gpr37l1	G protein-coupled receptor 37-like 1	1.2837249761710268	0.01044029847035233
1409	ENSRNOG00000050360	Urad	ureidoimidazoline (2-oxo-4-hydroxy-4-carboxy-5-) decarboxylase	1.284089384721452	2.0352837074742394e-4
1410	ENSRNOG00000019741	Isyna1	inositol-3-phosphate synthase 1	1.2862841131605611	2.6770334899071106e-8
1411	ENSRNOG00000067921	ENSRNOG00000067921	-	1.2875650624502735	2.3424081797512368e-4
1412	ENSRNOG00000036670	Tex19.1	testis expressed 19.1	1.2885832123256964	0.016705548785489133
1413	ENSRNOG00000018859	Pik3ip1	phosphoinositide-3-kinase interacting protein 1	1.2887476451597017	1.1292514843760863e-8
1414	ENSRNOG00000007490	Gabrr2	gamma-aminobutyric acid type A receptor subunit rho 2	1.289465949916485	0.002010397744158096
1415	ENSRNOG00000040242	Epm2a	EPM2A glucan phosphatase, laforin	1.2925328873782012	0.0021274117116276883
1416	ENSRNOG00000007477	Edn3	endothelin 3	1.2953653086193369	6.282871462811922e-4
1417	ENSRNOG00000003195	Caskin1	CASK interacting protein 1	1.2963323486439495	2.6302455196735355e-6
1418	ENSRNOG00000028781	Abcc6	ATP binding cassette subfamily C member 6	1.2964674553037427	0.0018881434680533846
1419	ENSRNOG00000001275	Tmem184a	transmembrane protein 184A	1.2983181055327901	4.635861455021135e-6
1420	ENSRNOG00000039305	Ezhip	EZH inhibitory protein	1.2995844094100535	0.0018524827745518323
1421	ENSRNOG00000006311	Ccr9	C-C motif chemokine receptor 9	1.2999191658659075	0.040946196791828746
1422	ENSRNOG00000061739	Klrk1	killer cell lectin like receptor K1	1.3034732257073853	0.005724293995931034
1423	ENSRNOG00000004292	Sptssa	serine palmitoyltransferase, small subunit A	1.3047059500333829	1.0844333823293935e-13
1424	ENSRNOG00000039560	Omd	osteomodulin	1.3048361485191802	2.236218515085478e-4
1425	ENSRNOG00000018982	Entpd3	ectonucleoside triphosphate diphosphohydrolase 3	1.3077709565282254	3.828138210407693e-5
1426	ENSRNOG00000009691	Lrrn2	leucine rich repeat neuronal 2	1.308964174428996	9.074958889217079e-6
1427	ENSRNOG00000020532	Kcnq1	potassium voltage-gated channel subfamily Q member 1	1.3109194531467052	6.890348939536739e-8
1428	ENSRNOG00000052572	Aff2	AF4/FMR2 family, member 2	1.3114168333518148	0.0015890161161146573
1429	ENSRNOG00000056258	Dsc1	desmocollin 1	1.3146149291193334	0.03492823351454639
1430	ENSRNOG00000022994	Nlrp5	NLR family, pyrin domain containing 5	1.3147875787547023	8.10456788697713e-5
1431	ENSRNOG00000071003	ENSRNOG00000071003	-	1.3165950583685373	0.003887729237985481
1432	ENSRNOG00000063870	ENSRNOG00000063870	-	1.3175534300904683	0.03806289897265085
1433	ENSRNOG00000015055	Scg2	secretogranin II	1.3194933513028557	0.00768521288334632
1434	ENSRNOG00000031849	Armh4	armadillo-like helical domain containing 4	1.3197422653029045	6.824300028174078e-11
1435	ENSRNOG00000048949	Elovl6	ELOVL fatty acid elongase 6	1.3204482003715055	7.157268431290184e-4
1436	ENSRNOG00000002984	Bmp15	bone morphogenetic protein 15	1.3206772613968725	0.0021068120260407234
1437	ENSRNOG00000011977	Sema5a	semaphorin 5A	1.320808102839104	1.2796757030341035e-5
1438	ENSRNOG00000007243	Havcr1	hepatitis A virus cellular receptor 1	1.3231729556224707	0.009106403988718316
1439	ENSRNOG00000003244	Ltc4s	leukotriene C4 synthase	1.3288042700475082	0.031429693911465995
1440	ENSRNOG00000006729	Slc24a4	solute carrier family 24 member 4	1.331772852466109	7.658166695167501e-6
1441	ENSRNOG00000009611	Bricd5	BRICHOS domain containing 5	1.3318440694054923	1.2180642365660226e-8
1442	ENSRNOG00000009708	Tas1r1	taste 1 receptor member 1	1.3344492245720416	0.008236795332978945
1443	ENSRNOG00000019751	Cyb5r2	cytochrome b5 reductase 2	1.3365884513547286	1.23933277607631e-10
1444	ENSRNOG00000014538	ENSRNOG00000014538	-	1.3372767408411321	0.004181965712951028
1445	ENSRNOG00000018841	Sox8	SRY-box transcription factor 8	1.3374265867085915	0.0012953944704504963
1446	MSTRG.12581	MSTRG.12581	-	1.338223399240771	1.0951057125783978e-4
1447	ENSRNOG00000004330	Chrdl1	chordin-like 1	1.3407631710557015	1.8758351918462416e-6
1448	ENSRNOG00000003134	Slc4a4	solute carrier family 4 member 4	1.3427803142855224	3.1932397539703718e-9
1449	ENSRNOG00000006144	Cntn3	contactin 3	1.342999604549312	8.897816155318387e-4
1450	ENSRNOG00000057221	Scn3b	sodium voltage-gated channel beta subunit 3	1.3437247301527704	0.011264458853445335
1451	ENSRNOG00000014850	Amhr2	anti-Mullerian hormone receptor type 2	1.3445400245452723	5.3282531379955575e-8
1452	ENSRNOG00000003681	Lct	lactase	1.3445674869354478	0.01318697671282853
1453	ENSRNOG00000066818	ENSRNOG00000066818	-	1.3456367121259591	0.040590054784804534
1454	ENSRNOG00000007250	Six4	SIX homeobox 4	1.3496639528877303	2.1625732477634074e-6
1455	ENSRNOG00000051993	Gdf10	growth differentiation factor 10	1.350323222165372	0.02337588076816037
1456	ENSRNOG00000070506	Chst8	carbohydrate sulfotransferase 8	1.3518208674936247	3.202713552620094e-11
1457	ENSRNOG00000002227	Kit	KIT proto-oncogene receptor tyrosine kinase	1.3543320653860578	6.621416864024878e-4
1458	ENSRNOG00000019570	Gng3	G protein subunit gamma 3	1.354585602495138	0.025159517737180385
1459	ENSRNOG00000063011	ENSRNOG00000063011	-	1.3561446826094579	2.9996495643275613e-12
1460	ENSRNOG00000067229	ENSRNOG00000067229	-	1.3578404165628368	0.0012844097105950446
1461	ENSRNOG00000011277	Btg4	BTG anti-proliferation factor 4	1.3584854545523817	0.033250975923484624
1462	ENSRNOG00000011177	Sftpc	surfactant protein C	1.3596245895601677	0.005657669949382141
1463	ENSRNOG00000007970	Plxnc1	plexin C1	1.3630325641168524	2.909766689495131e-4
1464	ENSRNOG00000061154	ENSRNOG00000061154	-	1.3633086729598043	0.006791784137547917
1465	ENSRNOG00000062984	Olr1619	olfactory receptor 1619	1.3643780683908022	0.025095017769941618
1466	ENSRNOG00000025069	Ly9	lymphocyte antigen 9	1.3649856770964535	5.391909387860257e-4
1467	ENSRNOG00000003562	Susd4	sushi domain containing 4	1.3674641901035367	9.30842145721949e-4
1468	ENSRNOG00000006841	Ano4	anoctamin 4	1.3675831575722368	5.331868114660715e-4
1469	ENSRNOG00000021670	Frem2	FRAS1 related extracellular matrix 2	1.3675965815799207	2.4104618306200722e-5
1470	ENSRNOG00000013906	Gpat2	glycerol-3-phosphate acyltransferase 2, mitochondrial	1.3699504560615874	0.035738511391573344
1471	ENSRNOG00000031974	Pcdh10	protocadherin 10	1.371115011269267	2.237761777361115e-9
1472	ENSRNOG00000051244	LOC102556277	LEM domain-containing protein 1-like	1.372365036767502	0.02817599931667571
1473	ENSRNOG00000021134	Anxa9	annexin A9	1.3742815688791197	0.042743339214665964
1474	ENSRNOG00000064277	ENSRNOG00000064277	-	1.374290892100374	8.807347400548201e-4
1475	ENSRNOG00000050207	Utf1	undifferentiated embryonic cell transcription factor 1	1.3767435192831625	0.01958147408252425
1476	ENSRNOG00000009815	Pnma2	PNMA family member 2	1.3785162642628324	0.001193204293503486
1477	ENSRNOG00000022067	Tlr5	toll-like receptor 5	1.378702343008981	3.194290223515479e-6
1478	ENSRNOG00000018426	Apoc1	apolipoprotein C1	1.3800526263455482	0.001574734734805168
1479	ENSRNOG00000029212	Vcan	versican	1.3807153401260246	1.78673207675561e-16
1480	ENSRNOG00000051372	Mycn	MYCN proto-oncogene, bHLH transcription factor	1.3810943658292283	0.0016471308270738876
1481	ENSRNOG00000062568	ENSRNOG00000062568	-	1.3840291304617343	2.84196156080052e-6
1482	ENSRNOG00000010777	Tox	thymocyte selection-associated high mobility group box	1.3867261637662904	2.3582600442650453e-4
1483	ENSRNOG00000032699	Ttyh1	tweety family member 1	1.3921584019502393	4.046215156244185e-5
1484	ENSRNOG00000017258	Ica1l	islet cell autoantigen 1-like	1.3926433311665336	0.0017243072452509502
1485	ENSRNOG00000002653	Kcnk2	potassium two pore domain channel subfamily K member 2	1.393492905601355	0.0027883740713516253
1486	ENSRNOG00000002092	Hunk	hormonally upregulated Neu-associated kinase	1.3946458848927143	1.2432262123800899e-8
1487	ENSRNOG00000028636	Xkr5	XK related 5	1.3947787448852873	3.126241615414524e-5
1488	ENSRNOG00000017773	Crispld1	cysteine-rich secretory protein LCCL domain containing 1	1.3959393116230865	1.1864717748775239e-7
1489	ENSRNOG00000001653	St3gal6	ST3 beta-galactoside alpha-2,3-sialyltransferase 6	1.3965497889543195	8.97297066327669e-7
1490	ENSRNOG00000007014	Cnksr2	connector enhancer of kinase suppressor of Ras 2	1.397265259449479	2.2103461995007014e-5
1491	ENSRNOG00000010047	Ddit4l2	DNA-damage-inducible transcript 4-like 2	1.3976732720376661	1.9680567879296065e-4
1492	ENSRNOG00000015461	Serpine2	serpin family E member 2	1.3977178884479495	5.222400095852006e-9
1493	ENSRNOG00000067308	ENSRNOG00000067308	-	1.3983947080735577	0.012006215639043012
1494	ENSRNOG00000061883	Aqp9	aquaporin 9	1.3989194187668277	0.019167911590297185
1495	ENSRNOG00000062997	ENSRNOG00000062997	-	1.4009543796954902	0.004140848794538309
1496	ENSRNOG00000063556	ENSRNOG00000063556	-	1.4010776691663351	0.026771300774597974
1497	ENSRNOG00000022964	Rnf222	ring finger protein 222	1.4036970490728242	0.029014075755006943
1498	ENSRNOG00000066615	ENSRNOG00000066615	-	1.4051838635749319	0.0013776724407692678
1499	ENSRNOG00000012892	Abca4	ATP binding cassette subfamily A member 4	1.4058521619206805	1.5159188781598997e-6
1500	ENSRNOG00000024620	Mamdc2	MAM domain containing 2	1.4071130810274945	0.001416184450933767
1501	ENSRNOG00000036830	Gtsf2	gametocyte specific factor 2	1.409361311388064	3.484933927635347e-4
1502	MSTRG.5149	MSTRG.5149	-	1.4130509217271057	0.02462521869647332
1503	ENSRNOG00000014840	Gna14	G protein subunit alpha 14	1.4182901595110597	1.341134602752094e-6
1504	ENSRNOG00000021546	Sit1	signaling threshold regulating transmembrane adaptor 1	1.4201755584377436	0.0016353614020812044
1505	ENSRNOG00000061304	Atp2b3	ATPase plasma membrane Ca2+ transporting 3	1.421243153231328	2.006505110510649e-4
1506	ENSRNOG00000026979	RGD1561444	similar to RIKEN cDNA 9530077C05	1.423069403474326	0.00426150839023297
1507	ENSRNOG00000014006	Neto1	neuropilin and tolloid like 1	1.4232544104564722	2.3409474661093544e-4
1508	ENSRNOG00000009465	Sfrp2	secreted frizzled-related protein 2	1.425296278122571	0.03190353643495253
1509	ENSRNOG00000024082	Gldn	gliomedin	1.4261060143897433	0.0012479603889524054
1510	ENSRNOG00000011381	Acsbg1	acyl-CoA synthetase bubblegum family member 1	1.4266015561179448	2.595663194763169e-4
1511	ENSRNOG00000066622	ENSRNOG00000066622	-	1.429286774985165	0.012180413815470132
1512	ENSRNOG00000022337	Slitrk6	SLIT and NTRK-like family, member 6	1.4321210889954274	1.5179525563321648e-4
1513	ENSRNOG00000015982	Wnt11	Wnt family member 11	1.4325672059678582	3.55038095678761e-4
1514	ENSRNOG00000003669	Myocd	myocardin	1.4331215504195467	3.552500657127674e-4
1515	ENSRNOG00000069293	ENSRNOG00000069293	-	1.4338774725618095	8.070322911922408e-7
1516	ENSRNOG00000013306	Pcdh20	protocadherin 20	1.4366044705868135	0.004066985482426574
1517	ENSRNOG00000007647	Oprk1	opioid receptor, kappa 1	1.4374695447138166	0.029068273285737765
1518	ENSRNOG00000016544	Arhgef28	Rho guanine nucleotide exchange factor 28	1.4377092441792478	1.774609361331305e-8
1519	ENSRNOG00000017445	Tubb2b	tubulin, beta 2B class IIb	1.4380046624459875	0.03125276688440195
1520	ENSRNOG00000022635	Dlg2	discs large MAGUK scaffold protein 2	1.4390472916916428	0.0015211581352280131
1521	ENSRNOG00000018059	Ihh	Indian hedgehog signaling molecule	1.4394607620672937	2.6769746450159834e-10
1522	ENSRNOG00000033844	Bex1	brain expressed, X-linked 1	1.4410996208762645	0.002051226268730411
1523	ENSRNOG00000015365	Col4a3	collagen type IV alpha 3 chain	1.4438314948930384	1.9718255976840468e-4
1524	ENSRNOG00000055382	Hcn1	hyperpolarization-activated cyclic nucleotide-gated potassium channel 1	1.4514623854674071	0.0023900695855217113
1525	ENSRNOG00000029528	Cbs	cystathionine beta synthase	1.4526168857282726	0.024576989383137477
1526	ENSRNOG00000021274	Fermt1	FERM domain containing kindlin 1	1.4527628692158525	0.0015728938815664758
1527	ENSRNOG00000001313	Gnaz	G protein subunit alpha z	1.4539397006414423	2.284186010192298e-5
1528	ENSRNOG00000022353	Klk13	kallikrein related-peptidase 13	1.4556516967714517	2.778850974602607e-7
1529	ENSRNOG00000011659	Alpk3	alpha-kinase 3	1.4584410924247582	1.0983266179152997e-5
1530	ENSRNOG00000016953	Chst4	carbohydrate sulfotransferase 4	1.4588022102495335	0.0012362745735573168
1531	ENSRNOG00000022848	Mageb6b1	MAGE family member B6B1	1.460934266845452	0.0010222956878635763
1532	ENSRNOG00000016291	Marveld3	MARVEL domain containing 3	1.4615081337487874	7.358863961947555e-7
1533	ENSRNOG00000050804	Zfp353	zinc finger protein 353	1.4626038793805043	0.0031990198616734388
1534	ENSRNOG00000026080	LOC688390	hypothetical protein LOC688390	1.4638467409130818	0.019825412007176406
1535	ENSRNOG00000011000	Rims1	regulating synaptic membrane exocytosis 1	1.4638971236497043	8.785166685345909e-4
1536	ENSRNOG00000009932	Mctp2	multiple C2 and transmembrane domain containing 2	1.4662350154867823	4.3971857160948344e-14
1537	ENSRNOG00000014963	Adgrg1	adhesion G protein-coupled receptor G1	1.4671902070662033	1.9929010046029296e-9
1538	ENSRNOG00000002339	Mark1	microtubule affinity regulating kinase 1	1.4706161124206034	9.435389794624169e-8
1539	ENSRNOG00000055496	LOC103690166	zinc finger protein OZF-like	1.4719481825470784	1.9201495822756263e-5
1540	ENSRNOG00000068201	RGD1565862	similar to Spindlin-like protein 2 (SPIN-2)	1.4728100167435942	3.283207355205178e-8
1541	ENSRNOG00000063392	ENSRNOG00000063392	-	1.4770471223087525	0.010132338374993
1542	ENSRNOG00000016289	Bmpr1b	bone morphogenetic protein receptor type 1B	1.4786488270422955	9.674003112503572e-6
1543	ENSRNOG00000042552	Olr118-ps	olfactory receptor pseudogene 118	1.4806262108526207	0.0028422321924981156
1544	ENSRNOG00000011548	Ebf2	EBF transcription factor 2	1.4816947333899328	0.026468141281156442
1545	ENSRNOG00000009219	Hepacam	hepatic and glial cell adhesion molecule	1.4835484124103486	6.4522671716933935e-9
1546	ENSRNOG00000016070	Trpc3	transient receptor potential cation channel, subfamily C, member 3	1.4862940297514597	2.2752147703737988e-9
1547	ENSRNOG00000011858	Unc5d	unc-5 netrin receptor D	1.4888511642972955	0.008919802669785636
1548	ENSRNOG00000071010	Bmp2	bone morphogenetic protein 2	1.4890246649514443	0.0013083331780569592
1549	ENSRNOG00000020097	Inha	inhibin subunit alpha	1.4911778071085742	1.2888768101629395e-6
1550	ENSRNOG00000017198	Hif3a	hypoxia inducible factor 3 subunit alpha	1.4943852850663655	0.003666837482789132
1551	ENSRNOG00000067047	ENSRNOG00000067047	-	1.4970535503491946	7.484718105790829e-7
1552	ENSRNOG00000063044	LOC102554479	zinc finger protein 120-like	1.4984331064484115	6.425305763855903e-4
1553	ENSRNOG00000004222	S100g	S100 calcium binding protein G	1.4988711917152258	0.048457842047053536
1554	ENSRNOG00000069560	ENSRNOG00000069560	-	1.5002293631108405	0.004807049712449735
1555	ENSRNOG00000018778	Cadm1	cell adhesion molecule 1	1.5003803843219132	3.856918963081426e-11
1556	ENSRNOG00000014702	Elovl2	ELOVL fatty acid elongase 2	1.5053162127740793	3.210330266293104e-9
1557	ENSRNOG00000030016	Robo3	roundabout guidance receptor 3	1.5075328740948621	0.03432535095725195
1558	ENSRNOG00000032729	Bex2	brain expressed X-linked 2	1.5119705461409028	1.095652442941041e-6
1559	ENSRNOG00000004275	Egfl6	EGF-like-domain, multiple 6	1.514627633594631	7.249515538305791e-6
1560	ENSRNOG00000008210	Ky	kyphoscoliosis peptidase	1.5176894127550156	0.005259403672502815
1561	ENSRNOG00000028092	Cpa2	carboxypeptidase A2	1.523087688323201	0.0019241816269569868
1562	ENSRNOG00000064589	ENSRNOG00000064589	-	1.5262562693033361	5.88162087159452e-4
1563	ENSRNOG00000002126	Ncam2	neural cell adhesion molecule 2	1.5274505404798433	0.001989355410533415
1564	ENSRNOG00000016783	Fshr	follicle stimulating hormone receptor	1.5293723879729268	6.911817929375329e-5
1565	ENSRNOG00000014163	Zfp536	zinc finger protein 536	1.529855671424435	6.376039410116928e-10
1566	ENSRNOG00000068040	ENSRNOG00000068040	-	1.534595297239581	0.00919776047957084
1567	ENSRNOG00000010357	Lhx9	LIM homeobox 9	1.5368717328944281	3.132941245248272e-8
1568	ENSRNOG00000011497	Aldh1b1	aldehyde dehydrogenase 1 family, member B1	1.5381404568040988	0.0010808733652604638
1569	ENSRNOG00000019435	Psd	pleckstrin and Sec7 domain containing	1.538918456656711	1.920374494135557e-6
1570	ENSRNOG00000042752	LOC362758	RING-type E3 ubiquitin-protein ligase PPIL2-like	1.5393227113954782	0.023558357759529774
1571	ENSRNOG00000003228	Mid1ip1	MID1 interacting protein 1	1.5410078246495196	1.4497871602763055e-5
1572	ENSRNOG00000028991	Kcnb2	potassium voltage-gated channel subfamily B member 2	1.5415625353966216	0.013653109359131993
1573	ENSRNOG00000008336	Tnfrsf11b	TNF receptor superfamily member 11B	1.542492162332778	0.044507238929812724
1574	ENSRNOG00000054311	LOC102551526	uncharacterized LOC102551526	1.5445321267155088	5.667697680805969e-6
1575	ENSRNOG00000048148	LOC120093684	lymphocyte antigen 6L-like	1.544626357310684	1.1630704606394388e-8
1576	ENSRNOG00000017456	Vstm2b	V-set and transmembrane domain containing 2B	1.5460390351322075	8.142754779028673e-5
1577	ENSRNOG00000063400	Shisa9	shisa family member 9	1.5514347248362343	1.0616052101987911e-4
1578	ENSRNOG00000016189	Frmd5	FERM domain containing 5	1.5517619544026362	5.191659964105266e-4
1579	ENSRNOG00000020058	Celsr2	cadherin, EGF LAG seven-pass G-type receptor 2	1.5532732454862017	1.9376152654549553e-7
1580	ENSRNOG00000068667	ENSRNOG00000068667	-	1.5547183470533275	0.006930607990323289
1581	ENSRNOG00000069705	ENSRNOG00000069705	-	1.556835016880423	3.9279459214638896e-4
1582	ENSRNOG00000007799	Fam151a	family with sequence similarity 151, member A	1.5570219616392618	0.034286466482086435
1583	ENSRNOG00000004874	Flrt3	fibronectin leucine rich transmembrane protein 3	1.5580588022899566	2.989051295048785e-10
1584	ENSRNOG00000007748	Tex15	testis expressed 15, meiosis and synapsis associated	1.5598338275430441	2.988722809421925e-10
1585	ENSRNOG00000047686	Pou3f1	POU class 3 homeobox 1	1.5599999097980692	1.121164246007944e-5
1586	ENSRNOG00000027142	Oog3	oogenesin 3	1.5607522734877068	0.016655027869418946
1587	ENSRNOG00000071034	LOC120093114	putative sperm motility kinase W	1.5609225206691006	0.002634113434715688
1588	ENSRNOG00000028541	Btnl2	butyrophilin-like 2	1.5649581543167717	0.002972569124714276
1589	ENSRNOG00000050006	Agtr2	angiotensin II receptor, type 2	1.570803996240638	0.02133835780350788
1590	ENSRNOG00000003899	Krt15	keratin 15	1.573237278658553	2.483903281775564e-9
1591	ENSRNOG00000011133	Trpc4	transient receptor potential cation channel, subfamily C, member 4	1.5741487354419916	2.6359455820879367e-4
1592	ENSRNOG00000021463	Ppara	peroxisome proliferator activated receptor alpha	1.5755605993981117	1.8642520125468362e-5
1593	ENSRNOG00000030243	Lrp1b	LDL receptor related protein 1B	1.5821590027939272	0.0012862435080072242
1594	ENSRNOG00000053303	Bend4	BEN domain containing 4	1.5841843012052645	0.0024864976587335905
1595	ENSRNOG00000028908	Eppin	epididymal peptidase inhibitor	1.5860987586053483	0.0011614885380204125
1596	ENSRNOG00000006503	Frmd3	FERM domain containing 3	1.5863045495258838	4.2796087521489363e-4
1597	ENSRNOG00000001827	Masp1	MBL associated serine protease 1	1.586744255958676	5.1641975320598036e-5
1598	ENSRNOG00000052017	Dio3	iodothyronine deiodinase 3	1.5936056572984152	0.0074343909179909245
1599	ENSRNOG00000066139	ENSRNOG00000066139	-	1.595078139974722	0.010233018708252996
1600	ENSRNOG00000029450	Adgrb1	adhesion G protein-coupled receptor B1	1.5972590797438888	4.595891596207039e-7
1601	ENSRNOG00000021468	Grm8	glutamate metabotropic receptor 8	1.605342170065133	0.0341908984919804
1602	ENSRNOG00000017438	Gfra1	GDNF family receptor alpha 1	1.6108043838557102	0.016150655326795865
1603	ENSRNOG00000054142	Slc30a2	solute carrier family 30 member 2	1.6131106456879143	0.0017867593754116906
1604	ENSRNOG00000060237	Inhbb	inhibin subunit beta B	1.618491787741307	2.513007344869438e-7
1605	MSTRG.19006	MSTRG.19006	-	1.6187061334915462	0.007719702307833316
1606	ENSRNOG00000068184	RGD1561442	similar to Vinculin (Metavinculin)	1.618926620998689	0.02382051553100451
1607	ENSRNOG00000018712	Camk2a	calcium/calmodulin-dependent protein kinase II alpha	1.6190174322502662	0.003479963881583894
1608	ENSRNOG00000065189	LOC102550466	disks large homolog 5-like	1.6199760147940152	0.018428562262474708
1609	ENSRNOG00000016483	Myo16	myosin XVI	1.6236938046107485	0.005980744068041374
1610	ENSRNOG00000000373	Ctnna3	catenin alpha 3	1.6358040592168415	1.2083449662716818e-4
1611	ENSRNOG00000003262	Cacng4	calcium voltage-gated channel auxiliary subunit gamma 4	1.6369879580016986	0.030078444047098307
1612	ENSRNOG00000064198	ENSRNOG00000064198	-	1.6450038474523019	5.077161599120812e-5
1613	ENSRNOG00000023299	Hfm1	helicase for meiosis 1	1.652574645268821	0.001699817598073566
1614	ENSRNOG00000036631	Ptgdr2	prostaglandin D2 receptor 2	1.6576062127770586	4.2198887192231054e-4
1615	ENSRNOG00000017444	Nrsn1	neurensin 1	1.6599284157020842	0.005592454066230543
1616	ENSRNOG00000031779	Ltf	lactotransferrin	1.6626897742059483	0.0341431349433856
1617	ENSRNOG00000035553	Mir202	microRNA 202	1.6637387758140951	0.0491106941417104
1618	ENSRNOG00000007508	Lrtm2	leucine-rich repeats and transmembrane domains 2	1.6656449979102355	0.01011020735171026
1619	ENSRNOG00000065780	ENSRNOG00000065780	-	1.6681810465986602	0.011275656196144733
1620	ENSRNOG00000068796	ENSRNOG00000068796	-	1.67093184654593	0.025001631678927678
1621	ENSRNOG00000001368	Rph3a	rabphilin 3A	1.673586134528503	0.004467522636604323
1622	ENSRNOG00000010158	Magel2	MAGE family member L2	1.6761409949666783	6.884529247579159e-5
1623	ENSRNOG00000020514	Sox6	SRY-box transcription factor 6	1.678989479485861	1.581310947044171e-7
1624	ENSRNOG00000007980	Anxa13	annexin A13	1.680035984606452	0.001953531292673055
1625	ENSRNOG00000002797	Gpr156	G protein-coupled receptor 156	1.6817376388004122	0.00102172876749043
1626	ENSRNOG00000054086	Sp5	Sp5 transcription factor	1.6874464660848119	9.342533335234198e-6
1627	MSTRG.5534	MSTRG.5534	-	1.6939950793705483	0.007687079053463105
1628	ENSRNOG00000015156	Gal	galanin and GMAP prepropeptide	1.700612878280402	0.004466554388300398
1629	ENSRNOG00000033348	Duox1	dual oxidase 1	1.7025776336948462	0.02959282242747099
1630	ENSRNOG00000003468	Capn8	calpain 8	1.7039779579366952	2.839775845116017e-4
1631	ENSRNOG00000004443	Sptlc3	serine palmitoyltransferase, long chain base subunit 3	1.7090777884535906	0.011983490598139732
1632	ENSRNOG00000004918	Kcna4	potassium voltage-gated channel subfamily A member 4	1.719245008193071	1.4942574425057421e-4
1633	ENSRNOG00000052510	Wnt10a	Wnt family member 10A	1.7204418371449022	0.014999860260941831
1634	ENSRNOG00000038297	Plekhd1	pleckstrin homology and coiled-coil domain containing D1	1.7254858935760065	8.233509058010765e-6
1635	ENSRNOG00000014008	Mfsd2a	major facilitator superfamily domain containing 2A	1.7286426337793246	3.8711133177144846e-4
1636	ENSRNOG00000014265	Tnfrsf19	TNF receptor superfamily member 19	1.732082741599429	8.692220920101248e-6
1637	ENSRNOG00000057162	RGD1564409	similar to hypothetical protein 4930509O22	1.7332964612589983	2.4355695907645017e-4
1638	ENSRNOG00000019830	Hsd17b1	hydroxysteroid (17-beta) dehydrogenase 1	1.7397669565098115	1.6940025647270885e-5
1639	ENSRNOG00000018330	Fam83f	family with sequence similarity 83, member F	1.7448247722210724	0.023531886428153466
1640	ENSRNOG00000063513	ENSRNOG00000063513	-	1.7459185282487908	1.2432262123800899e-8
1641	ENSRNOG00000025501	Snx31	sorting nexin 31	1.7468752963964167	0.040401987700734644
1642	ENSRNOG00000063634	ENSRNOG00000063634	-	1.7477728860390567	9.76816166375718e-19
1643	ENSRNOG00000008798	Pipox	pipecolic acid and sarcosine oxidase	1.7483204227980118	7.542883957353546e-8
1644	ENSRNOG00000045677	Nlrp6	NLR family, pyrin domain containing 6	1.7510999999980106	0.0027802666412118067
1645	ENSRNOG00000019447	Ecel1	endothelin converting enzyme-like 1	1.7555654684041884	5.795945573434776e-7
1646	ENSRNOG00000069840	Pcdh11x	protocadherin 11 X-linked	1.780606980255784	3.858728240337371e-6
1647	ENSRNOG00000063855	Cyp2b1	cytochrome P450, family 2, subfamily b, polypeptide 1	1.787324837290563	0.03844811443926674
1648	ENSRNOG00000047663	Gata1	GATA binding protein 1	1.7929685740991936	1.3767378970630116e-4
1649	ENSRNOG00000025957	Ooep	oocyte expressed protein	1.7948325992080032	6.234989497075472e-4
1650	ENSRNOG00000030547	Dpp6	dipeptidyl peptidase like 6	1.797015986410658	7.10144948703616e-4
1651	ENSRNOG00000063189	ENSRNOG00000063189	-	1.801814786684821	0.016293723468325715
1652	ENSRNOG00000068246	ENSRNOG00000068246	-	1.802550938716072	2.0072558954400605e-4
1653	ENSRNOG00000013399	Minar1	membrane integral NOTCH2 associated receptor 1	1.8036718982582174	0.04017429758431206
1654	ENSRNOG00000023493	Creb3l4	cAMP responsive element binding protein 3-like 4	1.8076318779387772	0.0020330916423979845
1655	ENSRNOG00000025581	Vwa2	von Willebrand factor A domain containing 2	1.8078427375606705	1.9487422640525331e-4
1656	ENSRNOG00000023476	Slc16a5	solute carrier family 16 member 5	1.8088656455426624	0.004024530591130204
1657	ENSRNOG00000063049	Pnma8c	PNMA family member 8C	1.8119009039881193	0.0010611929394908522
1658	ENSRNOG00000017546	Mylk3	myosin light chain kinase 3	1.8231901525642669	8.977489696366478e-27
1659	ENSRNOG00000008027	Cavin4	caveolae associated protein 4	1.8242624537996863	0.00712351084702231
1660	ENSRNOG00000063040	LOC108349479	zinc finger protein 431-like	1.8293847144521287	5.712153475341488e-4
1661	ENSRNOG00000017511	Dcdc2	doublecortin domain containing 2	1.8369305087318324	2.0700976513224658e-8
1662	ENSRNOG00000053301	LOC685767	similar to OX-2 membrane glycoprotein precursor (MRC OX-2 antigen) (CD200 antigen)	1.8373818087265565	0.021345934895512356
1663	ENSRNOG00000052294	Spint3	serine peptidase inhibitor, Kunitz type, 3	1.8456941627367491	6.96472799859814e-5
1664	ENSRNOG00000006096	Slc26a7	solute carrier family 26 member 7	1.8529346668071707	2.993087811416261e-7
1665	ENSRNOG00000018405	Apoc4	apolipoprotein C4	1.858208526585791	5.855941328532381e-4
1666	ENSRNOG00000059519	Bbox1	gamma-butyrobetaine hydroxylase 1	1.8585520798611328	0.0018544282836670317
1667	ENSRNOG00000026745	Acsl6	acyl-CoA synthetase long-chain family member 6	1.8657904102191607	4.915548638483856e-10
1668	ENSRNOG00000014166	Smoc2	SPARC related modular calcium binding 2	1.8658545193612865	0.00259131602100798
1669	ENSRNOG00000036680	Notum	NOTUM, palmitoleoyl-protein carboxylesterase	1.8729178351879843	1.4566442339712574e-8
1670	ENSRNOG00000070692	ENSRNOG00000070692	-	1.8778575621843754	1.5296030171148186e-4
1671	ENSRNOG00000009466	Unc45b	unc-45 myosin chaperone B	1.8781454742541286	3.6752676482922384e-4
1672	ENSRNOG00000049853	Rtl9	retrotransposon Gag like 9	1.8892161746172393	0.029766269362642876
1673	MSTRG.2148	MSTRG.2148	-	1.8973795130051871	1.6351187505664693e-4
1674	ENSRNOG00000053942	Pramef20	PRAME family member 20	1.8994079988225083	0.04265387642221384
1675	ENSRNOG00000070972	LOC102547093	uncharacterized LOC102547093	1.9002484389308139	3.208753929821889e-4
1676	ENSRNOG00000021800	Zfp541	zinc finger protein 541	1.9033035321730245	2.3409474661093544e-4
1677	ENSRNOG00000008034	Tmeff1	transmembrane protein with EGF-like and two follistatin-like domains 1	1.9059357698499548	0.008483227452324537
1678	ENSRNOG00000070022	LOC103690230	sperm motility kinase W-like	1.9060126725483093	6.911881764362912e-4
1679	ENSRNOG00000026247	Pebp4	phosphatidylethanolamine binding protein 4	1.9112130226607977	0.010071396881457155
1680	ENSRNOG00000005770	Sostdc1	sclerostin domain containing 1	1.9154534284065228	2.9279099894607596e-7
1681	ENSRNOG00000012802	Tenm3	teneurin transmembrane protein 3	1.9169478068687846	3.557156438179697e-6
1682	ENSRNOG00000029608	Nkain2	sodium/potassium transporting ATPase interacting 2	1.9241307898110427	0.0010411205039926325
1683	ENSRNOG00000019985	Asic4	acid sensing ion channel subunit family member 4	1.940849455961476	5.683016744231196e-11
1684	ENSRNOG00000026675	ENSRNOG00000026675	-	1.9437534933502196	0.007424446421765572
1685	ENSRNOG00000065552	ENSRNOG00000065552	-	1.9471575269872832	5.696192187173253e-5
1686	ENSRNOG00000027157	Ly6g6e	lymphocyte antigen 6 family member G6E	1.9511340547674332	2.9588731595903403e-6
1687	ENSRNOG00000033912	Fcho1	FCH and mu domain containing endocytic adaptor 1	1.974820101453139	0.017953178580182933
1688	ENSRNOG00000042041	Gal3st1	galactose-3-O-sulfotransferase 1	1.9790575505533003	0.019962280457582544
1689	ENSRNOG00000014979	Themis	thymocyte selection associated	1.9806526635174468	0.0032568593377510432
1690	ENSRNOG00000038957	RGD1305184	similar to CDNA sequence BC023105	1.9807302902071042	0.008537462827815926
1691	ENSRNOG00000021020	Gpha2	glycoprotein hormone subunit alpha 2	1.9816444067209387	1.5942223303474945e-4
1692	ENSRNOG00000006003	Ctnna2	catenin alpha 2	1.9844926477595928	1.5122672565045855e-4
1693	ENSRNOG00000029564	Trat1	T cell receptor associated transmembrane adaptor 1	1.9884935850711578	0.030245752734380526
1694	ENSRNOG00000068984	Gbp1	guanylate binding protein 1	2.001312374483978	0.03455423743077243
1695	ENSRNOG00000050035	Sall4	spalt-like transcription factor 4	2.005181375991024	4.2242326363390003e-4
1696	ENSRNOG00000068484	ENSRNOG00000068484	-	2.005611809660598	0.009672011160934914
1697	ENSRNOG00000069699	Slc25a53	solute carrier family 25, member 53	2.010348463561171	7.03197919455001e-22
1698	ENSRNOG00000003832	Vash2	vasohibin 2	2.0110033956638698	3.437473105697289e-5
1699	ENSRNOG00000066901	ENSRNOG00000066901	-	2.0143615201861937	0.0029659090830255457
1700	ENSRNOG00000014320	Inhba	inhibin subunit beta A	2.025527195150944	0.022706221056661813
1701	ENSRNOG00000010903	Crb1	crumbs cell polarity complex component 1	2.0336510370146397	2.2426018255433123e-8
1702	ENSRNOG00000068008	ENSRNOG00000068008	-	2.0515833032161264	0.0036219537355556062
1703	ENSRNOG00000003765	Nr0b1	nuclear receptor subfamily 0, group B, member 1	2.052635880276874	5.980445320191774e-5
1704	ENSRNOG00000023162	Ca14	carbonic anhydrase 14	2.0582255636077296	0.0033744654753894046
1705	ENSRNOG00000061038	Myh15	myosin, heavy chain 15	2.0672823378453855	3.2660815497538185e-4
1706	ENSRNOG00000019864	C1qtnf12	C1q and TNF related 12	2.069304780715159	6.523704135093826e-9
1707	ENSRNOG00000023340	Tmem72	transmembrane protein 72	2.089800215412516	0.007582166050941428
1708	ENSRNOG00000068642	Slc6a20a	solute carrier family 6 member 20a	2.092262121061229	1.3047988898562837e-7
1709	ENSRNOG00000009660	Enpp6	ectonucleotide pyrophosphatase/phosphodiesterase 6	2.110327966665093	1.6008782717606544e-4
1710	ENSRNOG00000004030	Nphs2	NPHS2 stomatin family member, podocin	2.1253821575694034	0.010498562714273307
1711	ENSRNOG00000016046	Hecw1	HECT, C2 and WW domain containing E3 ubiquitin protein ligase 1	2.125839158578752	3.1971684876983666e-6
1712	ENSRNOG00000062687	ENSRNOG00000062687	-	2.1488809415369188	0.014109825781695208
1713	ENSRNOG00000070376	ENSRNOG00000070376	-	2.1506142374080373	0.0012832857903075224
1714	ENSRNOG00000013128	Tmem179	transmembrane protein 179	2.1532306155717373	0.026694237658150703
1715	ENSRNOG00000012218	Poteg	POTE ankyrin domain family, member G	2.166590496433033	0.024023164367702143
1716	ENSRNOG00000066006	ENSRNOG00000066006	-	2.168048737386268	8.640507189860596e-11
1717	ENSRNOG00000069221	Kctd16	potassium channel tetramerization domain containing 16	2.175196925353756	3.2587466133990703e-12
1718	ENSRNOG00000018543	Atp4b	ATPase H+/K+ transporting subunit beta	2.175979687848004	0.030429133473237505
1719	ENSRNOG00000001924	Tp63	tumor protein p63	2.1807343019585512	0.0027339568606203463
1720	ENSRNOG00000030687	Olr1620	olfactory receptor 1620	2.1821654279013125	0.025741007896061232
1721	ENSRNOG00000037100	Heatr9	HEAT repeat containing 9	2.1919002849139715	8.599059871977657e-4
1722	ENSRNOG00000008837	Ass1	argininosuccinate synthase 1	2.2185024038128938	0.013211767282091393
1723	ENSRNOG00000016827	Slc38a3	solute carrier family 38, member 3	2.2196234875048306	0.00846237557123642
1724	ENSRNOG00000017060	Ryr2	ryanodine receptor 2	2.2269168873106597	5.087796840656809e-7
1725	ENSRNOG00000010555	Phyhip	phytanoyl-CoA 2-hydroxylase interacting protein	2.228427335043798	0.014549939254847521
1726	ENSRNOG00000014870	Slc13a5	solute carrier family 13 member 5	2.2305847632686078	0.0012976311548644978
1727	ENSRNOG00000069271	Ttn	titin	2.230679626269866	2.0547205139215284e-6
1728	ENSRNOG00000023824	RGD1561648	RGD1561648	2.2307396493250966	4.841443671906985e-9
1729	ENSRNOG00000066049	LOC102548374	uncharacterized LOC102548374	2.2491858828655165	0.044200785988937785
1730	ENSRNOG00000063579	ENSRNOG00000063579	-	2.254892429163836	1.3891417254403814e-12
1731	ENSRNOG00000066174	ENSRNOG00000066174	-	2.259515667655657	0.0025579712071879816
1732	ENSRNOG00000069744	LOC689770	similar to osteoclast inhibitory lectin	2.273215396894598	0.014144907063160298
1733	ENSRNOG00000053769	Soat2	sterol O-acyltransferase 2	2.285115491441045	7.407162718860533e-8
1734	ENSRNOG00000000559	Npffr1	neuropeptide FF receptor 1	2.294882559379885	0.006110765208363419
1735	ENSRNOG00000000010	Cbln1	cerebellin 1 precursor	2.314991034624799	0.003970229719570355
1736	ENSRNOG00000065633	ENSRNOG00000065633	-	2.3161827495563223	5.228413536780331e-10
1737	ENSRNOG00000063584	Rnase1	ribonuclease A family member 1, pancreatic	2.319302558320417	0.02412083538547264
1738	ENSRNOG00000008615	Mal2	mal, T-cell differentiation protein 2	2.369159130726434	1.3605603376979591e-30
1739	ENSRNOG00000030927	Grid2ip	Grid2 interacting protein	2.387222934093975	0.012195903072651193
1740	ENSRNOG00000047571	RGD1563231	similar to immunoglobulin kappa-chain VK-1	2.4194710028154978	0.02475980342125557
1741	ENSRNOG00000048850	LOC300024	similar to Ly6-B antigen gene	2.4266958236516487	2.1399016265762944e-15
1742	ENSRNOG00000000199	RGD1559995	similar to developmental pluripotency associated 5	2.4346255513834145	0.0010167526179815463
1743	ENSRNOG00000042030	Nlrp4a	NLR family, pyrin domain containing 4A	2.452093220655026	0.014458076198909979
1744	ENSRNOG00000028832	Sorcs3	sortilin-related VPS10 domain containing receptor 3	2.4638460643550726	2.9847069297583897e-5
1745	ENSRNOG00000001528	Gap43	growth associated protein 43	2.479608712574432	0.013645187811493141
1746	ENSRNOG00000070431	Efcab8	EF-hand calcium binding domain 8	2.494394080912175	0.027490562950792656
1747	ENSRNOG00000018853	Slc28a3	solute carrier family 28 member 3	2.501809865673462	1.6236449377844946e-22
1748	ENSRNOG00000013704	Cps1	carbamoyl-phosphate synthase 1	2.506891754903132	0.019040032187453038
1749	ENSRNOG00000070877	ENSRNOG00000070877	-	2.582213806398444	0.006581391428077224
1750	ENSRNOG00000011250	Inmt	indolethylamine N-methyltransferase	2.584402349402518	3.3133183210081054e-5
1751	ENSRNOG00000069252	Ptchd1	patched domain containing 1	2.5847319685993457	1.6588617791647432e-4
1752	ENSRNOG00000062838	ENSRNOG00000062838	-	2.5991129028235838	0.01615005489120796
1753	ENSRNOG00000015972	Ano5	anoctamin 5	2.619861066097469	1.2433879249024422e-7
1754	ENSRNOG00000070554	ENSRNOG00000070554	-	2.648815359152849	0.03482882681199214
1755	ENSRNOG00000000282	Gsc2	goosecoid homeobox 2	2.665511877546434	3.739601729668929e-5
1756	ENSRNOG00000052549	Chga	chromogranin A	2.675136614103609	0.0019049676257445148
1757	ENSRNOG00000028456	Ush1g	USH1 protein network component sans	2.6771402717727586	6.973941443355741e-8
1758	ENSRNOG00000066873	ENSRNOG00000066873	-	2.826812816453124	3.6986477470620544e-5
1759	ENSRNOG00000004327	Ddc	dopa decarboxylase	2.8334803490520653	1.7077378362800217e-5
1760	ENSRNOG00000027225	Ly6g6f	lymphocyte antigen 6 family member G6F	2.8409786551824485	8.41634590379837e-5
1761	ENSRNOG00000003769	Tmem163	transmembrane protein 163	2.850955462215294	4.8690914959474494e-5
1762	ENSRNOG00000024657	Mfsd4a	major facilitator superfamily domain containing 4A	2.8958584968770147	3.4493897018863268e-19
1763	ENSRNOG00000004900	Crhr1	corticotropin releasing hormone receptor 1	2.9396137474041666	7.217506823887442e-4
1764	ENSRNOG00000020045	Drgx	dorsal root ganglia homeobox	2.9643794853551566	0.0014453003749136965
1765	ENSRNOG00000019068	Ctrb1	chymotrypsinogen B1	2.9919219055336947	2.1331142878395034e-4
1766	ENSRNOG00000055939	Zcchc18	zinc finger, CCHC domain containing 18	2.998664994677951	1.44875827072851e-48
1767	ENSRNOG00000037375	RGD1565410	similar to Ly6-C antigen gene	3.06577510469367	9.287313651599956e-11
1768	ENSRNOG00000016835	Sycp1	synaptonemal complex protein 1	3.072328844200071	0.002540359645010607
1769	ENSRNOG00000020151	Cdh1	cadherin 1	3.0973746344968043	0.0016226313305804875
1770	ENSRNOG00000064685	ENSRNOG00000064685	-	3.157743688720088	0.004285773905140107
1771	ENSRNOG00000018664	Klk7	kallikrein-related peptidase 7	3.1928700682276805	1.389174017370539e-6
1772	ENSRNOG00000067295	ENSRNOG00000067295	-	3.2195136371665045	0.004066992460573072
1773	ENSRNOG00000022567	Gpr62	G protein-coupled receptor 62	3.247946661518597	1.438741280453769e-10
1774	ENSRNOG00000003601	RGD1564463	similar to Mdes protein	3.2736406773283795	1.568971318018649e-5
1775	MSTRG.10313	MSTRG.10313	-	3.297702469815625	4.182456530327008e-6
1776	ENSRNOG00000042407	Obp2a	odorant binding protein 2A	3.3406821983894694	0.004841441331577606
1777	ENSRNOG00000026430	Trim58	tripartite motif-containing 58	3.399504435558796	3.6021956578746586e-5
1778	ENSRNOG00000061004	Asphd2	aspartate beta-hydroxylase domain containing 2	3.40147945304526	6.04136751901551e-11
1779	ENSRNOG00000049695	Myh1	myosin heavy chain 1	3.525217870788974	3.886443457211498e-4
1780	ENSRNOG00000047481	Kiss1	KiSS-1 metastasis-suppressor	3.5797415750235397	7.455562650026419e-8
1781	ENSRNOG00000057996	Phactr3	phosphatase and actin regulator 3	3.6513950666374053	0.0035466347793461266
1782	ENSRNOG00000025757	Myh6	myosin heavy chain 6	3.6919991696331134	0.0027420816843371247
1783	ENSRNOG00000018580	Klk8	kallikrein related-peptidase 8	3.7852202404568316	0.0028169610392857567
1784	ENSRNOG00000067378	Myh13	myosin heavy chain 13	3.84773495020959	0.007679374594203949
1785	ENSRNOG00000029223	Prss32	protease, serine, 32	4.0045484419768815	8.840567200936731e-4
1786	ENSRNOG00000008819	Krt84	keratin 84	4.244450030660667	0.0012931388229251168
1787	ENSRNOG00000068013	ENSRNOG00000068013	-	5.447113825899979	1.649370692417793e-5
1788	ENSRNOG00000016659	Habp2	hyaluronan binding protein 2	5.587399863994114	4.3715754172517715e-7
