# Supplementary material for: Molecular Action of Tamoxifen in the Ovaries of Rats with Mammary Neoplasia
Source: Int J Mol Sci. 2023 Oct 30;24(21):15767. doi: 10.3390/ijms242115767 (PMC10649132; doi:10.3390/ijms242115767)
Supplement: Supplementary file 1 [file ijms-24-15767-s001.zip › supplementary/Table S4.xlsx]

## Sheet: Tab. S4
Supplementary Table S4. Functional enrichment analysis (GO) of the differentially expressed genes identified in ovaries of tumor-bearing rats treated with tamoxifen
No.	GO term ID	Term category	Description	P-adjusted	Number of DEGs enriched to particular GO term	List of DEGs enriched to the particular GO term
1	GO:0010876	BP	lipid localization	1.0124836240170437e-6	72	Apoc4, Apoc1, Apoe, Ldaf1, Kcnq1, P2ry2, Nmb, Pnlip, Syt7, Gal, Plppr4, Abca4, Fabp4, Lrat, Cftr, Lep, Mest, Abcb1b, Lpcat3, Apold1, Dysf, Cptp, Cpt2, Plin2, Mfsd2a, Agtr2, Pomc, Ppara, Apol2, Tspo, Ano4, Sqle, Atp8b3, Gpihbp1, Apoa1, Anxa2, Aqp9, Rbp2, Plscr1, Slco2a1, Abhd5, Rab11a, Erfe, Plin5, Vapa, Acsl3, Acsl6, Crhr1, Tex2, Vmp1, Gdf9, Proca1, Pctp, Fabp6, Ptgs2, Tnfrsf11a, Atp8a1, Cds1, Sp…
2	GO:0007548	BP	sex differentiation	1.1069410083266781e-7	68	Mir202, Kcnq1, Utf1, Gfra1, Hsd3b2, Sfrp2, Bmpr1b, Hsd3b1, Ptx3, Cftr, A2m, Lep, Nobox, Rad21l1, Tox2, Cebpb, Cntfr, Dhcr24, Edn2, Nr0b1, Gata1, Bmp15, Msh2, Fshr, Sdc1, Immp2l, Esr2, Six4, Myh9, Amh, Hmga2, Amhr2, Dhh, Mmp19, Fstl3, Tlr9, Pgr, Acsbg1, Cyp11a1, Vegfa, Idh1, Inha, Wnt9b, Cbx2, Sox8, Gdf9, Tex19.1, Inhbb, Lhx9, Tlr5, Kit, Ereg, Nefh, Fgf9, Akr1c3, Inhba, Tp63, Cbr1, Adamts1, Insl3,…
3	GO:0001503	BP	ossification	4.3388871461913615e-6	68	Wnt11, P2ry2, Scube2, Tcirg1, Tgfb1, S1pr1, Sfrp2, Bmpr1b, Sgms2, Tacr1, Alox5, Lep, Snx10, Bmp2, Cebpb, Gdf5, Creb3l1, Runx3, Epha2, Npr2, Zmpste24, Gata1, Chrdl1, Crim1, Id2, Scx, Mapk11, Vdr, Cthrc1, Dhh, Wnt10b, Mtss1, Fstl3, Acp5, Ltf, Vegfa, Runx2, Ihh, Igfbp5, Pam16, Asgr2, Sox8, Sh3pxd2b, Fgf18, Notum, Alox15, Ptgs2, Tnfrsf11a, Areg, Spp1, Igfbp3, Ptk2b, Fgf9, Mkx, Msx2, Omd, Hist1h2ao, U…
4	GO:0006631	BP	fatty acid metabolic process	3.559236433699937e-6	67	Apoc1, Lipe, Aig1, Cyp2b1, Ucp3, LOC681458, Scd, Acsm5, Fads2, Gstm7, Fabp4, Elovl6, Pdk4, Alox5, Lep, Akr1b7, Prkag2, Mgll, Lpin3, Trib3, Ptgds, Obp2a, Gpat2, Crat, Acot7, Cpt2, Mfsd2a, Edn2, Decr1, Acot9, Mid1ip1, Prkar2b, Acot4, Acot2, Acot1, Ppara, Avpr1a, Apoa1, Acsbg1, Gpx1, Abhd5, Erfe, Plin5, Acsl3, Acsl6, Nfe2l1, Sphk1, Ltc4s, Brca1, Alox15, Ptgs2, Ppargc1a, Oxsm, Echdc3, Akr1c2, Akr1c3,…
5	GO:0042060	BP	wound healing	5.796809476510988e-5	65	Habp2, Gpr4, Apoe, Bnc1, P2ry2, Smoc2, Tgfb1, Syt7, Nlrp6, Cadm4, Smpd1, F2rl1, Anxa5, S100a8, S100a9, F2rl2, Reg1a, Alox5, Dysf, Cd44, Adra2b, Fermt1, Duox1, Sdc4, Tnc, Epb41l4b, Timp1, Gata1, Sdc1, Tafa5, Ppara, Myh9, Ubash3b, Plet1, Mmp3, Mmp12, Anxa2, Gpx1, Vegfa, Ccl20, Serpine2, Pecam1, Tnfrsf12a, Actg1, Alox15, Serpinc1, Tec, Txk, Pf4, Plau, Msx2, Phldb2, Rab3a, Insl3, Plat, Comp, Lox, Fgf…
6	GO:0060537	BP	muscle tissue development	6.424510090679015e-4	64	Arntl, Tgfb1, H19, Alpk3, Hamp, Nphs1, Sox6, Fgf3, Neurl1, S1pr1, Homer1, Kcnab1, Pdlim5, Dysf, Adamts9, Neb, Ttn, Bmp2, Klhl41, Fkbp1a, Gata5, Eya1, Zmpste24, G6pd, Agtr2, Id2, Six4, Akap6, Ppara, Scx, Mapk11, Wnt10b, Ephb1, Gpx1, Vegfa, Gpc1, Ihh, Igfbp5, Tcap, P2rx5, Hlf, Sox8, Myocd, Ngfr, Sgcd, Hlx, Kcnk2, Atf3, Ppargc1a, Myh6, Myh7, Fgf9, Sgcg, Actn2, Pitx1, Itga8, Ryr2, Myh15, Rcan1, Tp63,…
7	GO:0050673	BP	epithelial cell proliferation	3.300222429717075e-4	63	Apoe, Bnc1, Klk8, Tgfb1, Cdkn1c, Sema5a, Sfrp2, Reg1a, Tacr1, Alox5, Lep, Dysf, Fermt1, Bmp2, Cebpb, Gdf5, Aplnr, Eya1, Runx3, Epha2, Cdkn2b, Plxnb3, Fshr, Id2, Esr2, Six4, Bcl11b, Hmga2, Vdr, Wnt10b, Ccn3, Mtss1, Apoa1, Mmp12, Pgr, Gpx1, Vegfa, Scg2, Col4a3, Ihh, Igfbp5, Serpinf1, Nme1, Fgf18, Etv4, Ngfr, Vash2, Kit, Areg, Ereg, Igfbp3, Rgcc, Fgf9, Loxl2, Plau, Tp63, Fgf1, Cdh1, Marveld3, Lims1,…
8	GO:0045137	BP	development of primary sexual characteristics	7.296275836503888e-8	62	Kcnq1, Utf1, Gfra1, Hsd3b2, Sfrp2, Bmpr1b, Hsd3b1, Ptx3, Cftr, A2m, Lep, Nobox, Rad21l1, Tox2, Cebpb, Edn2, Nr0b1, Gata1, Bmp15, Msh2, Fshr, Sdc1, Immp2l, Esr2, Six4, Myh9, Amh, Hmga2, Amhr2, Dhh, Mmp19, Fstl3, Tlr9, Pgr, Acsbg1, Cyp11a1, Vegfa, Idh1, Inha, Cbx2, Sox8, Gdf9, Tex19.1, Inhbb, Lhx9, Tlr5, Kit, Ereg, Nefh, Fgf9, Akr1c3, Inhba, Cbr1, Adamts1, Insl3, Star, Fanca, Sall1, Adgrg1, Serpine…
9	GO:0006869	BP	lipid transport	7.95508203573722e-6	62	Apoc4, Apoc1, Apoe, Kcnq1, P2ry2, Nmb, Pnlip, Syt7, Gal, Plppr4, Abca4, Fabp4, Lrat, Cftr, Lep, Abcb1b, Lpcat3, Apold1, Cptp, Cpt2, Plin2, Mfsd2a, Agtr2, Pomc, Apol2, Tspo, Ano4, Atp8b3, Gpihbp1, Apoa1, Anxa2, Aqp9, Rbp2, Plscr1, Slco2a1, Rab11a, Erfe, Vapa, Acsl3, Acsl6, Crhr1, Tex2, Vmp1, Gdf9, Proca1, Pctp, Fabp6, Ptgs2, Tnfrsf11a, Atp8a1, Spp1, Igfbp3, Abcc4, Inhba, Slc51a, Acsl1, Star, Xkr5,…
10	GO:0008406	BP	gonad development	7.311616697027523e-8	61	Kcnq1, Utf1, Gfra1, Hsd3b2, Sfrp2, Bmpr1b, Hsd3b1, Ptx3, Cftr, A2m, Lep, Nobox, Rad21l1, Tox2, Cebpb, Edn2, Nr0b1, Gata1, Bmp15, Msh2, Fshr, Sdc1, Immp2l, Esr2, Six4, Myh9, Amh, Hmga2, Amhr2, Dhh, Mmp19, Fstl3, Tlr9, Pgr, Acsbg1, Cyp11a1, Vegfa, Idh1, Inha, Sox8, Gdf9, Tex19.1, Inhbb, Lhx9, Tlr5, Kit, Ereg, Nefh, Fgf9, Akr1c3, Inhba, Cbr1, Adamts1, Insl3, Star, Fanca, Sall1, Adgrg1, Serpine1, Vgf…
11	GO:0010959	BP	regulation of metal ion transport	5.144203508754921e-4	61	Kcnq1, Tgfb1, Hamp, Fxyd5, Nkain2, Fxyd7, Trdn, Gal, Plpp4, Cd19, Pde4d, Glrx, Homer1, Trpc4, Kcnab1, Gstm7, Hsd3b2, Trpc3, Sri, Dpp6, Dysf, Eppin, Stom, Edn3, Fkbp1a, Aplnr, Nkain1, Ptpn3, Oprk1, G6pd, Fgf13, Wnk3, Akap6, Vdr, Tspo, Grin3b, Ubash3b, Tlr9, Scn3b, Thy1, Serpine2, Crhr1, Trpv2, P2rx5, Slc9a3r1, Vmp1, Stc2, Gpr39, Ptgs2, Ramp3, Kcnrg, Ptk2b, Actn2, Wnk2, Hecw1, Ryr2, Kcnn2, Camk2a, …
12	GO:0042391	BP	regulation of membrane potential	0.003941006371516876	60	Gna14, Kcnq1, Chrna7, Bnip3, Kcnk4, Cnih2, Trdn, Prdx3, Glrx, Gpr88, Trpc4, Hcn1, Cftr, Tacr1, Pclo, Dpp6, Grin2b, Kcnj8, Rims4, Il1rn, Trpa1, Gabrr2, Ptpn3, Oprk1, Zmpste24, Fgf13, Slc24a4, Tcl1a, Akap6, Tspo, Scn8a, Scn3b, Chrnb4, Snap91, Ltf, Chrna3, Chrna5, Rims1, P2rx5, Grin2c, Sez6, Chrnb1, Ngfr, Alox15, Gpr39, Kcnk2, Slc4a4, Cnga1, Ptk2b, Kcnma1, Actn2, Dcdc2, Ryr2, App, Kcnn2, Neto1, Cbln…
13	GO:0008202	BP	steroid metabolic process	7.328662121245267e-7	59	Apoc1, Apoe, Lipe, Dhcr7, Gal, Scd, Smpd1, Cyb5r2, Hsd3b2, Hsd3b5, Hsd3b3, Hsd3b1, Cftr, Lep, Lpcat3, Bmp2, Dhrs9, H6pd, Dhcr24, Timp1, Nr0b1, G6pd, Tspo, Dhh, Soat2, Sqle, Apoa1, Rora, Fdx1, Cyp11a1, Chst10, Nfe2l1, Fdxr, Pctp, Fabp6, Hsd17b1, Hsd11b1, Hsd17b7, Ppargc1a, Kit, Spp1, Ebpl, Kcnma1, Akr1c2, Akr1c13, Akr1c12, Idi1, Akr1c3, Akr1c1, Cbr1, App, Star, Msmo1, Slc10a2, Fgf1, Mvd, Hsd17b2, …
14	GO:0036293	BP	response to decreased oxygen levels	0.0033067348601798553	59	Chrna7, Tgfb1, Bnip3, Ucp3, Actn4, Hif3a, Il7, Cftr, Reg1a, Hk2, Lep, Tigar, Abcb1b, Apold1, Grin2b, Bmp2, Alas2, Pgk1, Dio3, Serpina1, Acot2, Ppara, Angptl4, Gpr182, Ucn2, Mmp3, Mmp12, Hmbs, Rora, Vegfa, Hspd1, Chchd2, Epha4, Acsl6, Crhr1, Myocd, Aldh3a1, Stc2, Lct, Kcnk2, Ptgs2, Ppargc1a, Sod3, Igfbp3, Rgcc, Ptk2b, Loxl2, Plau, Kcnma1, Ryr2, Plat, Angpt2, Acaa2, Hp, Mt3, Hk1, Cbs, Serpine1, Flt1
15	GO:0007409	BP	axonogenesis	0.007527831733117983	59	Apoe, Plppr4, Sema5a, Arhgef28, Dclk1, Bmpr1b, Ctnna2, Lrtm2, Plxna4, Sema3d, Mgll, Flrt3, Snap25, Lhx3, Ntng2, Edn3, Map1a, Runx3, Epha2, Dab1, Tmeff1, Edn2, Plxnb3, Fgf13, Bcl11b, Plxnc1, Robo3, Thy1, Snap91, Ephb1, Dixdc1, Rab11a, Sema7a, Vegfa, Epha4, Efnb3, Tnfrsf12a, Trpv2, Etv4, Ngfr, Enah, Lhx9, Lamc2, Epha5, Nefh, Bcl11a, Spp1, Slitrk6, Tubb2b, Unc5a, Map3k13, Kalrn, Gap43, App, Rab3a, D…
16	GO:0033674	BP	positive regulation of kinase activity	0.008494868146328658	59	Cib1, Wnt11, Tgfb1, Neurl1, Cd19, Vav3, Psrc1, Bmpr1b, Lep, Tigar, Prkag2, Rasgrp1, Cd44, Adra2b, Bmp2, Sdc4, Il1rn, Edn3, Epha2, Dab1, Clspn, Fgf13, Tcl1a, Akap6, Hmga2, Tlr9, Ltf, Ephb1, Chrna3, Vegfa, Epha4, Cd300a, Mmd, Fgf18, Tom1l1, Cdc6, Gdf9, Fam20a, Gpr39, Kif14, Tnfrsf11a, Epha5, Kit, Areg, Ereg, Rgcc, Ptk2b, Nek10, Mastl, Map3k13, App, Acsl1, Fgf1, Hbegf, Il34, Mt3, Cdkn1a, Pla2g1b, Fl…
17	GO:0019216	BP	regulation of lipid metabolic process	3.522115776892041e-5	58	Apoc1, Apoe, Sct, Rab38, Tgfb1, Dhcr7, Gal, Cd19, Vav3, Hsd3b5, Pdk4, Lep, Lpcat3, Prkag2, Trib3, Bmp2, Obp2a, H6pd, Mfsd2a, Zmpste24, Nr0b1, Mid1ip1, Id2, Bcl11b, Ppara, Angptl4, Tspo, Avpr1a, Dhh, Apoa1, Angptl8, Lactb, Rora, Abhd5, Erfe, Plin5, Idh1, Acsl3, Nfe2l1, Sphk1, Brca1, Gpr39, Ptgs2, Ppargc1a, Kit, Pik3ip1, Dnajc15, Ptk2b, Kcnma1, Akr1c3, App, Star, Tm6sf2, Fgf1, Tysnd1, Scarb1, Flt1,…
18	GO:0001666	BP	response to hypoxia	0.0012209895415993693	58	Chrna7, Tgfb1, Bnip3, Ucp3, Actn4, Hif3a, Il7, Reg1a, Hk2, Lep, Tigar, Abcb1b, Apold1, Grin2b, Bmp2, Alas2, Pgk1, Dio3, Serpina1, Acot2, Ppara, Angptl4, Gpr182, Ucn2, Mmp3, Mmp12, Hmbs, Rora, Vegfa, Hspd1, Chchd2, Epha4, Acsl6, Crhr1, Myocd, Aldh3a1, Stc2, Lct, Kcnk2, Ptgs2, Ppargc1a, Sod3, Igfbp3, Rgcc, Ptk2b, Loxl2, Plau, Kcnma1, Ryr2, Plat, Angpt2, Acaa2, Hp, Mt3, Hk1, Cbs, Serpine1, Flt1
19	GO:1904062	BP	regulation of cation transmembrane transport	1.1047075724031294e-4	57	Kcnq1, Tcirg1, Tgfb1, Hamp, Fxyd5, Cnih2, Fxyd7, Atp4a, Trdn, Gal, Cd19, Pde4d, Glrx, Homer1, Kcnab1, Gstm7, Hcn1, Alox5, Sri, Dpp6, Dysf, Stom, Edn3, Fkbp1a, Aplnr, Ptpn3, Oprk1, G6pd, Ace2, Fgf13, Wnk3, Akap6, Ubash3b, Tlr9, Scn3b, Thy1, Rasgrf1, Shisa9, Crhr1, Cacng4, P2rx5, Grin2c, Slc9a3r1, Vmp1, Gpr39, Ppargc1a, Ramp3, Kcnrg, Ptk2b, Actn2, Wnk2, Hecw1, Ryr2, App, Kcnn2, Neto1, Rph3a
20	GO:0007584	BP	response to nutrient	1.3308522133089415e-6	56	Tgfb1, Ucp3, Hamp, Folr1, Crym, Glrx, Sfrp2, Lrat, Hsd3b1, Alox5, A2m, Lep, Abcb1b, Cd44, Ass1, Tnc, Orm1, Cdkn2b, Otc, Vdr, Tspo, Soat2, Tnfrsf11b, Cd3e, Apoa1, Acp5, Hmbs, Gpx1, Cyp11a1, Vegfa, Runx2, Acsl3, Acsl6, Havcr1, Ltc4s, Aldh3a1, Stc2, Brca1, Lct, Ptgs2, Serpinc1, Spp1, Sftpc, Akr1c3, Ryr2, Adamts1, Acsl1, Star, Lpl, Lipg, Ctrb1, Hp, Cbs, Gstt1, Brca2, Kl
21	GO:0006066	BP	alcohol metabolic process	4.038671242536007e-5	56	Gde1, Apoc1, Apoe, Lipe, Aldh3b1, Pnlip, Dhcr7, Smpd1, Dhfr, Plpp1, Lrat, Cftr, Lep, Lpcat3, Dysf, Sord, Sptlc3, Bmp2, H6pd, Dhcr24, Aldh1b1, G6pd, Plb1, Sptssa, Myh9, Gpd1, Soat2, Sqle, Apoa1, Rbp2, Fdx1, Plcd1, Cyp11a1, Idh1, Nfe2l1, Sphk1, Fdxr, Pctp, Hsd17b7, Inpp5j, Gch1, Ptk2b, Kcnma1, Akr1c2, Idi1, Akr1c3, Sptlc1, Akr1c1, App, Star, Msmo1, Isyna1, Fgf1, Mvd, Mt3, Scarb1
22	GO:0006816	BP	calcium ion transport	0.006252762525501753	56	Epm2a, Chrna7, Tgfb1, Trpm1, Trdn, Trpm6, Slc35g1, Plpp4, Cd19, Pde4d, Homer1, Trpc4, Anxa5, Gstm7, Anxa9, Trpc3, Sri, Grin2b, Dysf, Slc25a25, Eppin, Ncs1, Fkbp1a, Aplnr, Trpa1, Slc24a2, Zmpste24, Atp2b3, G6pd, Wnk3, Slc24a4, Akap6, Vdr, Tspo, Grin3b, Ubash3b, Tlr9, Anxa2, Thy1, Crhr1, Cacng4, Trpv2, P2rx5, Grin2c, Vmp1, Stc2, Gpr39, Ptgs2, Ramp3, Ptk2b, Ryr2, Cacna2d3, Camk2a, Serpine1, Pla2g1b,…
23	GO:0006753	BP	nucleoside phosphate metabolic process	0.01077017854096519	56	Tgfb1, Gda, Enpp3, Nmrk1, Qprt, Acsm5, Pgam1, Pde4d, Elovl6, Pdk4, Hk2, Tigar, Prkag2, Gucy2c, Slc2a6, Epha2, Acot7, Npr2, Nt5c1a, Ctps1, Acot9, G6pd, Pgk1, Dlst, Acot4, Acot2, Acot1, Ppara, Gpd1, Rora, Entpd3, Acsl3, Acsl6, LOC691137, Nme1, Pipox, Afmid, Kmo, Mpc2, Ppargc1a, Slc4a4, Upp1, Ogdh, Pgam2, Sucla2, Oxsm, Pfkfb3, App, Acsl1, Aadat, Acaa2, Mvd, Hk1, Hkdc1, Acacb, Urad
24	GO:0021700	BP	developmental maturation	3.624296693168514e-5	55	Bnc1, Rab38, Tgfb1, Tdrd1, Cdkn1c, Gal, Neurl1, Dlg2, S1pr1, Cftr, Lep, Snx10, Cd44, Fermt1, Bmp2, Aurka, Runx3, Npr2, Atp6ap2, Chrdl1, G6pd, Id2, Esr2, Slc24a4, Sox10, Rnd1, Ntn4, Wnt10b, Angptl8, Pgr, Gldn, Vegfa, Runx2, Farp2, Ihh, Trim58, Baiap3, Sez6, Sox8, Gdf9, Kif14, Ereg, Bcl11a, Ptk2b, Kcnma1, Msx2, Mastl, Map3k13, App, Rab3a, Insl3, Cdkn1a, Rflna, Brca2, Bhlha15
25	GO:0071900	BP	regulation of protein serine/threonine kinase activity	1.5641169945993324e-4	55	Ptpn5, Apoe, Cib1, Tgfb1, Cdkn1c, Smpd1, Psrc1, Ccno, Sfrp2, Bmpr1b, Gadd45a, Prkag2, Dusp16, Rasgrp1, Trib3, Bmp2, Il1rn, Edn3, Cdkn2b, Prkar2b, Trib2, Tcl1a, Akap6, Hmga2, Trib1, Tlr9, Thy1, Ltf, Vegfa, Epha4, Cd300a, Ccnf, Myocd, Fgf18, Cdc6, Gdf9, Fam20a, Gpr39, Tnfrsf11a, Kit, Rgcc, Ptk2b, Nek10, Mastl, Map3k13, App, Acsl1, Fgf1, Spry4, Il34, Cbs, Cdkn1a, Prkar1b, Pla2g1b, Flt1
26	GO:0051480	BP	regulation of cytosolic calcium ion concentration	0.0015784536414162147	55	Gpr4, P2ry2, Tgfb1, Trpm1, Nmb, Ptgir, Gng3, Trdn, Slc35g1, Ric3, Cd19, Gnat2, Pde4d, S1pr1, Trpc4, F2rl1, Gstm7, Ptgfr, F2rl2, Trpc3, Tacr1, Sri, Grin2b, Ncs1, Fkbp1a, Aplnr, Trpa1, Slc24a2, Edn2, Atp2b3, Gata1, Slc24a4, Chga, Akap6, Myh9, Avpr1a, Ubash3b, Thy1, Plcd1, Ccr9, Cxcr6, Cxcr2, Gpr55, Crhr1, Trpv2, P2rx5, Grin2c, Gpr39, Kiss1, Cnga1, Ramp3, Ptk2b, Ryr2, Calb2, Pla2g1b
27	GO:0001655	BP	urogenital system development	0.0037854620050515723	55	Irx2, Gpr4, Dact2, Hells, Wnt11, Tgfb1, Nphs1, Cdkn1c, Rln1, Gfra1, Frem2, Vcan, Car2, Klf15, Kcnj8, Cd44, Bmp2, Sdc4, Ass1, Eya1, Tnc, Zmpste24, Agtr2, Id2, Sdc1, Esr2, Six4, Amh, Mtss1, Fstl3, Gcnt3, Ctsh, Vegfa, Cxcr2, Col4a3, Wnt6, Epha4, Pecam1, Serpinf1, Wnt9b, Sox8, Myocd, Kif26b, Nphs2, Lif, Fras1, Spp1, Itga8, Tp63, Adamts1, Crlf1, Angpt2, Col4a1, Fgf1, Sall1
28	GO:0001558	BP	regulation of cell growth	0.00779945097082024	55	Apoe, Cib1, Wnt11, Epm2a, Tgfb1, Hamp, Sema5a, Psrc1, Sfrp2, Reg1a, Plxna4, Sema3d, Clstn3, Mgll, Cd44, Frzb, Slc23a2, Tnc, Mfsd2a, Sdcbp, G6pd, Fgf13, Cgref1, Akap6, Ppara, Avpr1a, Ccn3, Ei24, Minar1, Rab11a, Sema7a, Vegfa, Serpine2, Rims1, Igfbp5, Tnfrsf12a, Sphk1, Trpv2, Myocd, Gdf9, Kif14, Bcl11a, Spp1, Nf2, Igfbp3, Ptk2b, Inhba, Map3k13, Bcl6, Hbegf, Osgin1, Mt3, Hspa1a, Cdkn1a, Rasal1
29	GO:0009117	BP	nucleotide metabolic process	0.011827469022166468	55	Tgfb1, Gda, Enpp3, Nmrk1, Qprt, Acsm5, Pgam1, Pde4d, Elovl6, Pdk4, Hk2, Tigar, Prkag2, Gucy2c, Slc2a6, Epha2, Acot7, Npr2, Nt5c1a, Ctps1, Acot9, G6pd, Pgk1, Dlst, Acot4, Acot2, Acot1, Ppara, Gpd1, Rora, Acsl3, Acsl6, LOC691137, Nme1, Pipox, Afmid, Kmo, Mpc2, Ppargc1a, Slc4a4, Upp1, Ogdh, Pgam2, Sucla2, Oxsm, Pfkfb3, App, Acsl1, Aadat, Acaa2, Mvd, Hk1, Hkdc1, Acacb, Urad
30	GO:0022407	BP	regulation of cell-cell adhesion	0.012026091256516842	55	Tgfb1, Scgb1a1, Pde4d, Il7, Celsr2, Vtcn1, Myo10, Alox5, Lep, Il23r, Il12rb2, Rasgrp1, Cd44, Bmp2, Sdc4, Cebpb, Il1rn, Ass1, Runx3, Foxp3, Ppara, Fstl3, Cd3e, Apoa1, Ubash3b, Thy1, Vegfa, Hspd1, Ihh, Serpine2, Zap70, Efnb3, Cd300a, Skap1, Alox15, Kif26b, Slamf1, Hlx, Ildr2, Tnfsf18, Nf2, Rgcc, Il2ra, Bcl6, Sftpd, Fcho1, Tenm3, Megf10, Cdh1, Chst4, Cdsn, Btnl2, Notch4, Hspb1, Clec4g
31	GO:0001667	BP	ameboidal-type cell migration	0.014314311553638647	54	Apoe, Cib1, Wnt11, Smoc2, Tgfb1, Folr1, Plk2, Sema5a, Tacr1, Gadd45a, Sema3d, Adamts9, Fermt1, Crb2, Sdc4, Edn3, Epha2, Epb41l4b, Edn2, Timp1, Lgmn, Sox10, Myh9, Ptprr, Ccn3, Adgrb1, Apoa1, Mmp12, Ctsh, Dnaja4, Gpx1, Rab11a, Sema7a, Vegfa, Pecam1, Serpinf1, Sox8, Fgf18, Ptgs2, Kit, Rgcc, Ptk2b, Loxl2, Insl3, Bag4, Angpt2, Fgf1, Hbegf, Bcar1, Marveld3, Scarb1, Serpine1, Hspb1, Radil
32	GO:0045785	BP	positive regulation of cell adhesion	0.029434711567922843	54	Cib1, Smoc2, Tgfb1, Pde4d, Il7, Vtcn1, Vav3, Sfrp2, Myo10, Alox5, Lep, Il23r, Il12rb2, Dysf, Frmd5, Rasgrp1, Cd44, Fermt1, Sdc4, Runx3, Epb41l4b, Egfl6, Foxp3, Myh9, Fstl3, Cd3e, Apoa1, Thy1, Vegfa, Hspd1, Ihh, Zap70, Epha4, Efnb3, Skap1, Tmem102, Alox15, Kif26b, Slamf1, Hlx, Tnfsf18, Lif, Spp1, Ptk2b, Il2ra, Bcl6, Bag4, Fcho1, Megf10, Cdh1, Chst4, Adgrg1, Lims1, Btnl2
33	GO:0001819	BP	positive regulation of cytokine production	0.04677133902104581	54	Wnt11, P2ry2, Tgfb1, Il27, Nlrp10, Pde4d, Il7, Vtcn1, F2rl1, Polr3g, Lep, Il23r, Il12rb2, Klrk1, Rasgrp1, Fermt1, Agpat2, Cebpb, Orm1, Atp6ap2, Agtr2, Foxp3, Panx2, Gsdmd, Mapk11, Cd3e, Cadm1, Mmp12, Tlr9, Rora, Sema7a, Hspd1, Ccl20, Sphk1, Itk, Brca1, Ly9, Slamf1, Ptgs2, Tlr5, Kit, Txk, Ereg, Pf4, Rgcc, App, Lpl, Cd226, Hk1, Hspa1a, Btnl2, Serpine1, Hspb1, Pla2g1b
34	GO:0060249	BP	anatomical structure homeostasis	1.854505756730361e-4	53	P2ry2, Tcirg1, Tgfb1, Hamp, Prdx5, Tub, Il7, S1pr1, Homer1, Abca4, Car2, Pdk4, Snx10, Crb2, Ncs1, Map1a, LOC100361457, Sh3gl2, Mfsd2a, Atp2b3, Gata1, Wnk3, Fshr, Scx, Tnfrsf11b, Acp5, Ubash3b, Tlr9, Ctsh, Ltf, Vegfa, Ihh, Gpr55, Ush1g, Actg1, Crb1, Ptgs2, Tnfrsf11a, Ildr2, Spp1, Ptk2b, Nkiras1, Slc28a3, Ildr1, Sftpd, Ccdc66, Comp, Tex15, Lox, Calb2, Tff3, Hspb1, Tmem119
35	GO:0003012	BP	muscle system process	0.01618681301132941	53	Kcnq1, Hamp, Pde4d, Foxo1, Homer1, Pdlim5, Trpc3, Tacr1, Lep, Sri, Klf15, Kcnj8, Adra2b, Ttn, Edn3, Fkbp1a, Gata5, Trpa1, Myom3, Trim63, Edn2, G6pd, Agtr2, Ace2, Fgf13, Chga, Akap6, Ppara, Scn3b, Pgr, Chrnb4, Chrna3, Igfbp5, Tcap, Sphk1, Sgca, Myh1, Myocd, Chrnb1, Sgcd, Ptgs2, Ppargc1a, Kit, Pgam2, Myh6, Myh7, Kcnma1, Actn2, Ryr2, Comp, Kcnn2, Ctnna3, Flt1
36	GO:1903131	BP	mononuclear cell differentiation	0.0311732922044848	53	Tcirg1, Tgfb1, Themis, Clcf1, Il27, Cd19, Il7, F2rl1, Tpd52, Lep, Il12rb2, Rasgrp1, Cd44, Cebpb, Runx3, Tox, Cdh17, Gata1, Foxp3, Msh2, Id2, Bcl11b, Myh9, Pde1b, Cd3d, Cd3e, Tlr9, Cd3g, Rora, Ccr9, Vegfa, Runx2, Ihh, Zap70, Ikzf3, Itk, Ly9, Slamf1, Hlx, Batf3, Tnfsf18, Kit, Txk, Bcl11a, Ptk2b, Gpr183, Prr7, Nfil3, Il2ra, Bcl6, Fanca, Il34, Hspb1
37	GO:0009914	BP	hormone transport	0.0030954694229322925	52	Arntl, Sct, Kcnq1, Tcirg1, Nmb, Syt7, Gal, Crym, Glrx, Anxa5, Cftr, Tacr1, Alox5, Lep, Sri, Pclo, Snap25, Il1rn, Edn3, Trpa1, C1qtnf12, Edn2, Oprk1, Slc16a2, Agtr2, Pomc, Chga, Myh9, Hmga2, Vdr, Tspo, Avpr1a, Ccn3, Ucn2, Inha, Crhr1, Baiap3, Gdf9, Gpr39, Inhbb, Kiss1, Mpc2, Ildr2, Epha5, Lif, Spp1, Igfbp3, Inhba, Kalrn, Ildr1, Rab11fip1, Vgf
38	GO:0045860	BP	positive regulation of protein kinase activity	0.00580529952204126	52	Cib1, Wnt11, Tgfb1, Neurl1, Psrc1, Bmpr1b, Lep, Prkag2, Rasgrp1, Adra2b, Bmp2, Sdc4, Il1rn, Edn3, Dab1, Clspn, Fgf13, Tcl1a, Akap6, Hmga2, Tlr9, Ltf, Chrna3, Vegfa, Epha4, Cd300a, Mmd, Fgf18, Tom1l1, Cdc6, Gdf9, Fam20a, Gpr39, Kif14, Tnfrsf11a, Kit, Areg, Ereg, Rgcc, Ptk2b, Nek10, Mastl, Map3k13, App, Acsl1, Fgf1, Hbegf, Il34, Mt3, Cdkn1a, Pla2g1b, Flt1
39	GO:0071496	BP	cellular response to external stimulus	0.012727563348221713	52	Wnt11, Tgfb1, Bnip3, Kcnk4, Fosl1, Folr1, Foxo1, Elapor1, Sfrp2, Pdk4, Asns, Lep, Gadd45a, Abcb1b, Grin2b, Prkag2, Bmp2, Tnc, Cdkn2b, Mfsd2a, Ppara, Gsdmd, Scx, Myh9, Vdr, Avpr1a, Slc38a3, Ucn2, Mmp3, Vegfa, Myh13, Sphk1, Wnt9b, Ltc4s, Myocd, Asgr1, Inhbb, Atf3, Ptgs2, Tlr5, Upp1, Tmem150c, Dnajc15, Sftpc, Mkx, Akr1c3, Adamts1, Lpl, Cbs, Cdkn1a, Serpine1, Bhlha15
40	GO:0030099	BP	myeloid cell differentiation	0.014876551540629014	52	Kcnq1, Cib1, Tcirg1, Tgfb1, Cdkn1c, Sox6, Prdx3, F2rl1, Car2, Hsd3b1, Lep, Snx10, Cebpb, Epha2, Cdkn2b, Csf3r, Alas2, Gata1, G6pd, Fshr, Id2, Myh9, Pde1b, Tnfrsf11b, Trib1, Fstl3, Acp5, Ubash3b, Anxa2, Plscr1, Vegfa, Farp2, Gpr55, Trim58, Nfe2l1, Nme1, Batf3, Tnfrsf11a, Kit, Lif, Pf4, Ptk2b, Gpr183, Sfxn1, Inhba, Bcl6, App, Lox, Il34, Mpig6b, Hspa1a, Pilrb
41	GO:0050767	BP	regulation of neurogenesis	0.027357549859359575	52	Arntl, Apoe, Tgfb1, Clcf1, Neurl1, Sema5a, Plxna4, Sema3d, Rheb, Bmp2, Dab1, Hes2, Cdkn2b, Plxnb3, Bex1, Fgf13, Id2, Mycn, Sox10, Hmga2, Tspo, Plxnc1, Khdc3, Anxa2, Thy1, Snap91, Dixdc1, Rab11a, Sema7a, Vegfa, Serpine2, Epha4, Efnb3, Serpinf1, Tnfrsf12a, Trpv2, Sox8, Gpr37l1, Kit, Lif, Bcl11a, Spp1, Nf2, Map3k13, Kalrn, Star, Il34, Mt3, Egr2, Cux2, Cit, Flt1
42	GO:1901653	BP	cellular response to peptide	0.03543204466241068	52	Ptpre, Tgfb1, Vwa2, Foxo1, Anxa5, Car2, Hsd3b1, Reg1a, Pdk4, Lep, Klf15, Lpin3, Trib3, Obp2a, Ass1, C1qtnf12, Orm1, Agtr2, Lgmn, Vdr, Rangap1, Pgr, Rasgrf1, Cyp11a1, Erfe, Rab31, Cps1, Epha4, Acsl6, Crhr1, Igfals, Cdc6, Ngfr, Inhbb, Myh7, Slc39a14, Actn2, Echdc3, Akr1c3, App, Star, Lpl, Plat, Cacna2d3, Camk2a, Gpt2, Bcar1, Irs3, Serpine1, Ywhag, Pla2g1b, Kl
43	GO:0097305	BP	response to alcohol	0.03997232316113236	52	Apoe, Chrna7, Tgfb1, Hamp, Fosl1, S100a8, S100a9, Hsd3b2, Ca3, Ptgfr, Hsd3b5, Hsd3b3, Hsd3b1, Cftr, Tacr1, A2m, Lep, Grin2b, Slc23a2, Psmd14, H6pd, Tnc, Oprk1, Tp53inp1, G6pd, Foxp3, Esr2, Serpina1, Ppara, Tspo, Avpr1a, Acp5, Fdx1, Cyp11a1, Crhr1, Nfe2l1, Brca1, Lct, Inhbb, Epha5, Ptk2b, Akr1c2, Akr1c3, Inhba, Adamts1, Star, Cdh1, Hspa1a, Ggt1, Cdkn1a, Serpine1, Flt1
44	GO:0007162	BP	negative regulation of cell adhesion	2.904779088560126e-5	51	Dact2, Tgfb1, Actn4, Scgb1a1, Sema5a, Vtcn1, Gbp1, Plxna4, Cd44, Bmp2, Sdc4, Cebpb, Il1rn, Ass1, Runx3, Tnc, Dab1, Plxnb3, Foxp3, Ppara, Rnd1, Plxnc1, Apoa1, Acp5, Ubash3b, Plet1, Mmp12, Vegfa, Ihh, Serpine2, Epha4, Cd300a, Hlx, Ildr2, Tnfsf18, Epha5, Nf2, Rgcc, Il2ra, Phldb2, Bcl6, Sftpd, Angpt2, Spry4, Bcar1, Cdh1, Cdsn, Notch4, Serpine1, Hspb1, Clec4g
45	GO:0030198	BP	extracellular matrix organization	3.522115776892041e-5	51	Adamtsl3, Smoc2, Tgfb1, Adamts17, Loxl4, Nphs1, Sfrp2, Ptx3, Adamts9, Fermt1, Bmp2, Ntng2, Creb3l1, Egfl6, Fshr, Chadl, Scx, Ntn4, Mmp19, Tnfrsf11b, Loxl1, Mpzl3, Col5a3, Mmp3, Mmp12, Anxa2, Mmp10, Kif9, Col4a3, Ihh, Noxo1, Tpsab1, Sh3pxd2b, Lamb3, Adamts4, Adamts3, Rgcc, Loxl2, Mkx, Itga8, Phldb2, App, Adamts1, Comp, Col4a2, Col4a1, Lox, Col18a1, Adamts14, Col13a1, Mmp11
46	GO:0043062	BP	extracellular structure organization	3.624296693168514e-5	51	Adamtsl3, Smoc2, Tgfb1, Adamts17, Loxl4, Nphs1, Sfrp2, Ptx3, Adamts9, Fermt1, Bmp2, Ntng2, Creb3l1, Egfl6, Fshr, Chadl, Scx, Ntn4, Mmp19, Tnfrsf11b, Loxl1, Mpzl3, Col5a3, Mmp3, Mmp12, Anxa2, Mmp10, Kif9, Col4a3, Ihh, Noxo1, Tpsab1, Sh3pxd2b, Lamb3, Adamts4, Adamts3, Rgcc, Loxl2, Mkx, Itga8, Phldb2, App, Adamts1, Comp, Col4a2, Col4a1, Lox, Col18a1, Adamts14, Col13a1, Mmp11
47	GO:0045229	BP	external encapsulating structure organization	3.81188286535139e-5	51	Adamtsl3, Smoc2, Tgfb1, Adamts17, Loxl4, Nphs1, Sfrp2, Ptx3, Adamts9, Fermt1, Bmp2, Ntng2, Creb3l1, Egfl6, Fshr, Chadl, Scx, Ntn4, Mmp19, Tnfrsf11b, Loxl1, Mpzl3, Col5a3, Mmp3, Mmp12, Anxa2, Mmp10, Kif9, Col4a3, Ihh, Noxo1, Tpsab1, Sh3pxd2b, Lamb3, Adamts4, Adamts3, Rgcc, Loxl2, Mkx, Itga8, Phldb2, App, Adamts1, Comp, Col4a2, Col4a1, Lox, Col18a1, Adamts14, Col13a1, Mmp11
48	GO:0044706	BP	multi-multicellular organism process	1.490012847709264e-4	51	Arntl, Lipe, Tgfb1, Fosl1, Nlrp5, Prdx3, Hsd3b1, Tacr1, Lep, Tead4, Pzp, Adra2b, Il1rn, Timp1, Alas2, Ace2, Maged2, Sostdc1, Endou, Vdr, Avpr1a, Slc38a3, Mmp3, Mmp12, Pgr, Ooep, Cyp11a1, Vegfa, Ihh, Serpine2, Igfbp5, Sphk1, Vmp1, Sh3pxd2b, Stc2, Tekt3, Ptgs2, Kiss1, Hsd17b7, Lif, Igfbp3, Plau, Akr1c3, Sfrp4, Kalrn, Angpt2, Cdh1, Cbs, Serpine1, Hspb1, Flt1
49	GO:0031589	BP	cell-substrate adhesion	0.0017047756050800533	51	Ttyh1, Cib1, Smoc2, Itgad, Actn4, Vwa2, Atrnl1, Itga10, Gbp1, Adamts9, Fermt1, Sdc4, Ntng2, Egfl6, Ston1, Myh9, Ntn4, Cd3e, Apoa1, Col5a3, Plet1, Mmp12, Thy1, Ephb1, Vegfa, Pecam1, Tnfrsf12a, Itgae, Skap1, Actg1, Alox15, Kif14, Lamb3, Spp1, Ptk2b, Plau, Actn2, Itga8, Epdr1, Phldb2, Cd96, Bcl6, Angpt2, Onecut2, Spry4, Bcar1, Lims1, Col13a1, Serpine1, Micall2, Radil
50	GO:0015711	BP	organic anion transport	0.002603682991665499	51	Abcc6, Epm2a, P2ry2, Slc6a5, Nmb, Slc22a6, Folr1, Trpc4, Slc16a4, Cftr, Lep, Slc4a5, Abcb1b, Grin2b, Slc6a6, Slc25a25, Slc13a3, Slc23a2, Il1rn, Slco5a1, Cptp, Mfsd2a, Slc26a7, Agtr2, Ace2, Avpr1a, Slc38a3, Aqp9, Slco2a1, Slc6a20a, Nfe2l1, Slc16a6, Slc13a2, Slc9a3r1, Slc16a5, Proca1, Slc13a5, Slc16a11, Kmo, Ptgs2, Mpc2, Tnfrsf11a, Slc4a4, Lrrc8c, Abcc4, Sfxn1, Slc17a3, Slc51a, Slc25a15, Slc10a2, P…
51	GO:0072001	BP	renal system development	0.0027374569532347057	51	Irx2, Gpr4, Dact2, Hells, Wnt11, Tgfb1, Nphs1, Cdkn1c, Gfra1, Frem2, Vcan, Car2, Klf15, Kcnj8, Cd44, Bmp2, Sdc4, Ass1, Eya1, Zmpste24, Agtr2, Id2, Sdc1, Six4, Mtss1, Fstl3, Gcnt3, Ctsh, Vegfa, Cxcr2, Col4a3, Wnt6, Epha4, Pecam1, Serpinf1, Wnt9b, Sox8, Myocd, Kif26b, Nphs2, Lif, Fras1, Spp1, Itga8, Tp63, Adamts1, Crlf1, Angpt2, Col4a1, Fgf1, Sall1
52	GO:0046879	BP	hormone secretion	0.0030059424865918213	51	Arntl, Sct, Kcnq1, Tcirg1, Nmb, Syt7, Gal, Glrx, Anxa5, Cftr, Tacr1, Alox5, Lep, Sri, Pclo, Snap25, Il1rn, Edn3, Trpa1, C1qtnf12, Edn2, Oprk1, Slc16a2, Agtr2, Pomc, Chga, Myh9, Hmga2, Vdr, Tspo, Avpr1a, Ccn3, Ucn2, Inha, Crhr1, Baiap3, Gdf9, Gpr39, Inhbb, Kiss1, Mpc2, Ildr2, Epha5, Lif, Spp1, Igfbp3, Inhba, Kalrn, Ildr1, Rab11fip1, Vgf
53	GO:0019693	BP	ribose phosphate metabolic process	0.0033440291202892847	51	Tgfb1, Gda, Acsm5, Pgam1, Pde4d, Elovl6, Pdk4, Hk2, Tigar, Prkag2, Gucy2c, Slc2a6, Epha2, Acot7, Npr2, Nt5c1a, Ctps1, Acot9, G6pd, Pgk1, Dlst, Pygl, Acot4, Acot2, Acot1, Ppara, Gpd1, Rora, Acsl3, Acsl6, LOC691137, Nme1, Pipox, Mpc2, Ppargc1a, Slc4a4, Upp1, Ogdh, Pgam2, Sucla2, Oxsm, Pfkfb3, App, Acsl1, Aadat, Acaa2, Mvd, Hk1, Hkdc1, Acacb, Urad
54	GO:0048511	BP	rhythmic process	0.004356423541319777	51	Arntl, Kcnq1, Dbp, Chrna7, Magel2, Glrx, Homer1, Bmpr1b, Ptx3, A2m, Lep, Grin2b, Arntl2, Gpr176, Ptgds, Bmp2, Ass1, Per3, Edn2, Oprk1, Fshr, Id2, Esr2, Chga, Ppara, Myh9, Amh, Mmp19, Pgr, Rora, Spsb4, Npas2, Serpinf1, Top2a, Hlf, Gdf9, Ngfr, Kiss1, Tnfrsf11a, Ppargc1a, Ddc, Ereg, Sftpc, Kcnma1, Nfil3, Inhba, Cbr1, Adamts1, Gdf10, Star, Egr2
55	GO:0051047	BP	positive regulation of secretion	0.013575577497603582	51	Sct, Kcnq1, Sytl2, P2ry2, Tgfb1, Nmb, Syt7, Gal, Pcsk1, Glrx, F2rl1, S100a8, S100a9, Cftr, Tacr1, Lep, Sri, Grin2b, Ttn, Bmp2, Sdc4, Snap25, Edn3, Ncs1, Trpa1, C1qtnf12, Edn2, Oprk1, Sdcbp, Gata1, Agtr2, Sdc1, Myh9, Vdr, Avpr1a, Plcd1, Acsl3, Crhr1, Sphk1, Baiap3, Gpr39, Kmo, Inhbb, Kiss1, Mpc2, Tnfrsf11a, Lif, Spp1, Rgcc, Ildr1, Rab3a
56	GO:0042692	BP	muscle cell differentiation	0.020407829972135937	51	Tgfb1, Alpk3, Actn4, Hamp, Nphs1, Enpp3, Sox6, Trdn, Homer1, Pdlim5, Dysf, Neb, Ttn, Bmp2, Klhl41, Aplnr, Zmpste24, G6pd, Agtr2, Id2, Sdc1, Six4, Akap6, Ppara, Myh9, Avpr1a, Wnt10b, Ccn3, Adgrb1, Rora, Gpx1, Vegfa, Igfbp5, Tcap, Myocd, Chrnb1, Actg1, Sgcd, Kit, Ereg, Myh6, Fgf9, Actn2, Itga8, Rcan1, Comp, Lox, Megf10, Mylk3, Tmem119, Bhlha15
57	GO:0015849	BP	organic acid transport	5.239882727538257e-4	50	Apoe, Epm2a, P2ry2, Slc6a5, Nmb, Slc22a6, Folr1, Trpc4, Fabp4, Lep, Grin2b, Slc6a6, Slc13a3, Slc23a2, Il1rn, Cpt2, Plin2, Mfsd2a, Slc26a7, Slc16a2, Agtr2, Ace2, Avpr1a, Slc38a3, Aqp9, Rbp2, Slc6a20a, Erfe, Acsl3, Acsl6, Nfe2l1, Slc13a2, Slc9a3r1, Tmem104, Proca1, Slc13a5, Slc16a11, Fabp6, Kmo, Mpc2, Tnfrsf11a, Lrrc8c, Abcc4, Sfxn1, Slc51a, Slc7a4, Acsl1, Slc25a15, Slc10a2, Pla2g1b
58	GO:0072521	BP	purine-containing compound metabolic process	0.013858064700102004	50	Tgfb1, Gda, Acsm5, Pgam1, Pde4d, Elovl6, Pdk4, Hk2, Tigar, Prkag2, Gucy2c, Slc2a6, Adal, Epha2, Acot7, Npr2, Mtap, Nt5c1a, Acot9, Pgk1, Dlst, Acot4, Acot2, Acot1, Ppara, Gpd1, Gamt, Rora, Acsl3, Acsl6, LOC691137, Nme1, Pipox, Mpc2, Ppargc1a, Slc4a4, Ogdh, Pgam2, Sucla2, Oxsm, Pfkfb3, App, Acsl1, Aadat, Acaa2, Mvd, Hk1, Hkdc1, Acacb, Urad
59	GO:0046394	BP	carboxylic acid biosynthetic process	2.5380178112339664e-5	49	Apoc1, Carns1, LOC681458, Psat1, Scd, Acsm5, Fads2, Dhfr, Bhmt, Gstm7, Elovl6, Pdk4, Alox5, Asns, Bcat1, Mgll, Trib3, Ptgds, Dhrs9, Ass1, Acot7, Mtap, Edn2, Mid1ip1, Otc, Avpr1a, Gamt, Apoa1, Acsbg1, Acsl3, Sphk1, Ltc4s, Brca1, Alox15, Nags, Kmo, Ptgs2, Oxsm, Akr1c3, Elovl2, Star, Lpl, Lipg, Fa2h, Cbs, Ggt1, Sdsl, Pla2g1b, Acacb
60	GO:0016053	BP	organic acid biosynthetic process	2.8783668076452136e-5	49	Apoc1, Carns1, LOC681458, Psat1, Scd, Acsm5, Fads2, Dhfr, Bhmt, Gstm7, Elovl6, Pdk4, Alox5, Asns, Bcat1, Mgll, Trib3, Ptgds, Dhrs9, Ass1, Acot7, Mtap, Edn2, Mid1ip1, Otc, Avpr1a, Gamt, Apoa1, Acsbg1, Acsl3, Sphk1, Ltc4s, Brca1, Alox15, Nags, Kmo, Ptgs2, Oxsm, Akr1c3, Elovl2, Star, Lpl, Lipg, Fa2h, Cbs, Ggt1, Sdsl, Pla2g1b, Acacb
61	GO:0071695	BP	anatomical structure maturation	3.522115776892041e-5	49	Bnc1, Tgfb1, Tdrd1, Cdkn1c, Gal, Dlg2, S1pr1, Cftr, Lep, Snx10, Cd44, Fermt1, Bmp2, Aurka, Runx3, Npr2, Atp6ap2, G6pd, Id2, Esr2, Slc24a4, Sox10, Rnd1, Ntn4, Wnt10b, Angptl8, Pgr, Gldn, Vegfa, Runx2, Farp2, Ihh, Trim58, Sox8, Gdf9, Kif14, Ereg, Bcl11a, Ptk2b, Kcnma1, Msx2, Mastl, Map3k13, App, Insl3, Cdkn1a, Rflna, Brca2, Bhlha15
62	GO:0044703	BP	multi-organism reproductive process	1.9897973628453487e-4	49	Arntl, Lipe, Tgfb1, Fosl1, Nlrp5, Prdx3, Hsd3b1, Tacr1, Lep, Tead4, Pzp, Adra2b, Il1rn, Timp1, Alas2, Ace2, Maged2, Sostdc1, Endou, Vdr, Avpr1a, Slc38a3, Mmp3, Mmp12, Pgr, Ooep, Cyp11a1, Vegfa, Ihh, Serpine2, Igfbp5, Sphk1, Vmp1, Stc2, Ptgs2, Kiss1, Hsd17b7, Lif, Igfbp3, Plau, Akr1c3, Sfrp4, Kalrn, Angpt2, Cdh1, Cbs, Serpine1, Hspb1, Flt1
63	GO:0044282	BP	small molecule catabolic process	0.0010479207357704942	49	Asrgl1, Apoe, Lipe, Aig1, Aldh3b1, Gda, Qprt, Hk2, Lep, Tigar, Bcat1, Aldh1l1, Sord, Lpin3, Obp2a, Crat, Adal, Padi3, Acot7, Iffo2, Cpt2, Aldh1b1, Mfsd2a, Decr1, Otc, Dlst, Acot4, Acot2, Amdhd1, Plin5, Pipox, Afmid, Kmo, Upp1, Inpp5j, Akr1c3, Hgd, Cbr1, Mat1a, Aadat, Acaa2, Mt3, Tysnd1, Cbs, Scarb1, Hpd, Sdsl, Acacb, Urad
64	GO:0009259	BP	ribonucleotide metabolic process	0.00549517125603688	49	Tgfb1, Gda, Acsm5, Pgam1, Pde4d, Elovl6, Pdk4, Hk2, Tigar, Prkag2, Gucy2c, Slc2a6, Epha2, Acot7, Npr2, Nt5c1a, Ctps1, Acot9, Pgk1, Dlst, Acot4, Acot2, Acot1, Ppara, Gpd1, Rora, Acsl3, Acsl6, LOC691137, Nme1, Pipox, Mpc2, Ppargc1a, Slc4a4, Upp1, Ogdh, Pgam2, Sucla2, Oxsm, Pfkfb3, App, Acsl1, Aadat, Acaa2, Mvd, Hk1, Hkdc1, Acacb, Urad
65	GO:0050878	BP	regulation of body fluid levels	0.024362466669259477	49	Habp2, Apoe, Sct, Sytl2, P2ry2, Nlrp6, Rln1, Scd, Neurl1, Celsr2, F2rl1, Anxa5, S100a9, F2rl2, Cftr, Tacr1, Hk2, Slc4a5, Abcb1b, Adra2b, Aplnr, Oprk1, Alas2, Gata1, Wnk3, Myh9, Vdr, Avpr1a, Ubash3b, Anxa2, Vegfa, Serpine2, Nme1, Actg1, Serpinc1, Tec, Txk, Pf4, Plau, Kcnma1, Kalrn, Tp63, Comp, Cdh1, Fa2h, Mpig6b, Pnpla1, Serpine1, Hspb1
66	GO:0001894	BP	tissue homeostasis	7.648773619472763e-5	48	Tcirg1, Tgfb1, Hamp, Prdx5, Tub, Il7, S1pr1, Homer1, Abca4, Car2, Pdk4, Snx10, Crb2, Map1a, LOC100361457, Sh3gl2, Mfsd2a, Gata1, Wnk3, Fshr, Scx, Tnfrsf11b, Acp5, Ubash3b, Tlr9, Ctsh, Ltf, Vegfa, Ihh, Gpr55, Ush1g, Actg1, Crb1, Ptgs2, Tnfrsf11a, Ildr2, Spp1, Ptk2b, Nkiras1, Slc28a3, Ildr1, Sftpd, Ccdc66, Comp, Tex15, Tff3, Hspb1, Tmem119
67	GO:0060326	BP	cell chemotaxis	2.2289061384145643e-4	48	Smoc2, Pde4d, S1pr1, Sema5a, F2rl1, Vav3, S100a8, S100a9, Alox5, Klrk1, Dysf, Edn3, Epha2, Edn2, Csf3r, Plxnb3, Chga, Lgmn, Ccn3, Ephb1, Ccr9, Cxcr6, Vegfa, Cxcr2, Scg2, Ccl20, Hoxb9, Fgf18, Tmem102, Slamf1, Tnfsf18, Kit, Pf4, Spp1, Ptk2b, Gpr183, Cxcl14, Retnlg, App, Lox, Fgf1, Hbegf, Bcar1, Il34, Serpine1, Hspb1, Pla2g1b, Flt1
68	GO:0006790	BP	sulfur compound metabolic process	2.9468725496192827e-4	48	Ethe1, Gsto2, Chst8, Mamdc2, Acsm5, Bhmt, Gstm7, Elovl6, Pdk4, Gss, Nfs1, Chac1, Chst1, Acot7, Mtap, Acot9, G6pd, Dlst, Acot4, Acot2, Acot1, Gamt, Gsta4, Gpx1, B3gnt7, Cps1, Idh1, Acsl3, Acsl6, Nfe2l1, Pipox, Mpc2, Ogdh, Sucla2, Oxsm, Acsl1, Mat1a, Aadat, Acaa2, Mvd, Chst4, Ciapin1, Gstt3, Cbs, Ggt1, Gstt1, Chst12, Acacb
69	GO:0031960	BP	response to corticosteroid	6.892231831491438e-4	48	Pnliprp2, Cpn1, Tgfb1, H19, Ucp3, Fosl1, Scgb1a1, Pcsk1, Foxo1, Hsd3b2, Fabp4, Hsd3b5, Hsd3b3, Hsd3b1, A2m, Grin2b, Fibin, Ptgds, Il1rn, Ass1, Trim63, Orm1, Agtr2, Sdc1, Esr2, Avpr1a, Ucn2, Hmbs, Acsbg1, Cyp11a1, Vegfa, Hspd1, Cps1, Igfals, Serpinf1, Aldh3a1, Ptgs2, Areg, Sftpc, Kcnma1, Akr1c3, Sfrp4, Sftpd, Star, Plat, Hp, Cdkn1a, Serpine1
70	GO:0019932	BP	second-messenger-mediated signaling	0.001079424801213242	48	Ptgdr2, Apoe, Sct, Cib1, Gal, Rln1, Pde4d, Gbp1, Ptgfr, Lep, Grin2b, Edn3, Aplnr, Npr2, Edn2, Zmpste24, Gpr143, Pomc, Slc24a4, Chga, Akap6, Avpr1a, Cd3e, Gpr62, Ccr9, Cxcr6, Vegfa, Cxcr2, Ccl20, Zap70, Crhr1, Rasd1, Sphk1, Tmem100, Grin2c, Sgcd, Epha5, Ptk2b, Ryr2, Trat1, Rcan1, App, Insl3, Necab2, Tox3, Mt1, Cbs, Bhlha15
71	GO:0007204	BP	positive regulation of cytosolic calcium ion concentration	0.003993517903039635	48	Gpr4, P2ry2, Tgfb1, Trpm1, Nmb, Ptgir, Gng3, Trdn, Ric3, Cd19, Gnat2, Pde4d, S1pr1, F2rl1, Gstm7, Ptgfr, F2rl2, Trpc3, Tacr1, Sri, Grin2b, Fkbp1a, Aplnr, Trpa1, Slc24a2, Edn2, Gata1, Slc24a4, Akap6, Myh9, Avpr1a, Ubash3b, Thy1, Plcd1, Ccr9, Cxcr6, Cxcr2, Gpr55, Crhr1, Trpv2, P2rx5, Grin2c, Gpr39, Kiss1, Ramp3, Ptk2b, Ryr2, Pla2g1b
72	GO:0001822	BP	kidney development	0.005773627052620245	48	Irx2, Gpr4, Dact2, Hells, Wnt11, Tgfb1, Nphs1, Cdkn1c, Gfra1, Frem2, Vcan, Car2, Klf15, Kcnj8, Cd44, Bmp2, Sdc4, Ass1, Eya1, Zmpste24, Agtr2, Id2, Sdc1, Six4, Mtss1, Fstl3, Gcnt3, Ctsh, Vegfa, Cxcr2, Col4a3, Wnt6, Epha4, Pecam1, Serpinf1, Wnt9b, Sox8, Kif26b, Nphs2, Lif, Fras1, Spp1, Itga8, Adamts1, Crlf1, Angpt2, Fgf1, Sall1
73	GO:0042886	BP	amide transport	0.00603668180276161	48	Arntl, Sct, Kcnq1, Tcirg1, Syt7, Folr1, Gal, Glrx, Anxa5, S100a8, S100a9, Car2, Cftr, Alox5, Lep, Sri, Pclo, Abcb1b, Slc13a3, Snap25, Il1rn, Edn3, Trpa1, C1qtnf12, Cptp, Cdh17, Slc16a2, Chga, Myh9, Hmga2, Avpr1a, Ccn3, Aqp9, Vapa, Crhr1, Baiap3, Slc9a3r1, Gpr39, Inhbb, Kiss1, Mpc2, Ildr2, Epha5, Lif, Abcc4, Kalrn, Ildr1, Vgf
74	GO:0062012	BP	regulation of small molecule metabolic process	0.00603668180276161	48	Apoc1, Apoe, Dhcr7, Pgam1, Foxo1, Pdk4, Lep, Tigar, Lpcat3, Prkag2, Trib3, Bmp2, Slc2a6, Obp2a, H6pd, C1qtnf12, Mfsd2a, Zmpste24, Mid1ip1, Pomc, Ppara, Myh9, Avpr1a, Gpd1, Apoa1, Rora, Plcd1, Erfe, Plin5, Nfe2l1, Brca1, Ptgs2, Ppargc1a, Kit, Slc4a4, Igfbp3, Ptk2b, Kcnma1, Akr1c3, Pfkfb3, Ppp1r3g, App, Star, Fgf1, Gpt2, Tysnd1, Tff3, Acacb
75	GO:0050678	BP	regulation of epithelial cell proliferation	0.012096119238543335	48	Apoe, Bnc1, Tgfb1, Cdkn1c, Sema5a, Sfrp2, Reg1a, Tacr1, Alox5, Lep, Dysf, Bmp2, Gdf5, Aplnr, Eya1, Runx3, Cdkn2b, Plxnb3, Esr2, Six4, Bcl11b, Hmga2, Vdr, Wnt10b, Mtss1, Mmp12, Pgr, Gpx1, Vegfa, Scg2, Col4a3, Ihh, Serpinf1, Nme1, Fgf18, Etv4, Ngfr, Vash2, Rgcc, Fgf9, Plau, Tp63, Fgf1, Cdh1, Marveld3, Lims1, Brca2, Flt1
76	GO:0007517	BP	muscle organ development	0.003993517903039635	47	Arntl, Tgfb1, H19, Nphs1, Fgf3, Neurl1, S1pr1, Homer1, Kcnab1, Dysf, Ttn, Bmp2, Klhl41, Ass1, Fkbp1a, Jph1, Cntfr, Cavin4, Six4, Scx, Scn8a, Wnt10b, Adgrb1, Ephb1, Ky, Gpx1, Gpc1, Tcap, P2rx5, Hlf, Sox8, Myocd, Ngfr, Unc45b, Hlx, Atf3, Lif, Myh6, Myh7, Mkx, Pitx1, Ryr2, Myh15, Rcan1, Lox, Megf10, Egr2
77	GO:0009150	BP	purine ribonucleotide metabolic process	0.005773627052620245	47	Tgfb1, Gda, Acsm5, Pgam1, Pde4d, Elovl6, Pdk4, Hk2, Tigar, Prkag2, Gucy2c, Slc2a6, Epha2, Acot7, Npr2, Nt5c1a, Acot9, Pgk1, Dlst, Acot4, Acot2, Acot1, Ppara, Gpd1, Rora, Acsl3, Acsl6, LOC691137, Nme1, Pipox, Mpc2, Ppargc1a, Slc4a4, Ogdh, Pgam2, Sucla2, Oxsm, Pfkfb3, App, Acsl1, Aadat, Acaa2, Mvd, Hk1, Hkdc1, Acacb, Urad
78	GO:0050890	BP	cognition	0.014568446314729817	47	Apoe, Sct, Rin1, Klk8, Epm2a, Chrna7, Kcnk4, Sorcs3, Fosl1, Pde4d, Plk2, Gpr88, Kcnab1, Tacr1, Grin2b, Snap25, Cebpb, Il1rn, Map1a, Slc24a2, Mfsd2a, Oprk1, Fgf13, Shroom4, Ptchd1, Aff2, Prkar2b, Esr2, Lgmn, Mgat3, Pde1b, Chst10, Crhr1, Serpinf1, Kcnk2, Ptgs2, Kit, Atp8a1, Itga8, Dcdc2, Kalrn, Rcan1, App, Neto1, Egr2, Cux2, Prkar1b
79	GO:0006163	BP	purine nucleotide metabolic process	0.01618681301132941	47	Tgfb1, Gda, Acsm5, Pgam1, Pde4d, Elovl6, Pdk4, Hk2, Tigar, Prkag2, Gucy2c, Slc2a6, Epha2, Acot7, Npr2, Nt5c1a, Acot9, Pgk1, Dlst, Acot4, Acot2, Acot1, Ppara, Gpd1, Rora, Acsl3, Acsl6, LOC691137, Nme1, Pipox, Mpc2, Ppargc1a, Slc4a4, Ogdh, Pgam2, Sucla2, Oxsm, Pfkfb3, App, Acsl1, Aadat, Acaa2, Mvd, Hk1, Hkdc1, Acacb, Urad
80	GO:0060562	BP	epithelial tube morphogenesis	0.021508167139049062	47	Irx2, Wnt11, Tgfb1, Folr1, Fgf3, Sema5a, Sfrp2, Cd44, Bmp2, Sdc4, Sall4, Aplnr, Eya1, Clic4, Epha2, Tnc, Agtr2, Sostdc1, Mycn, Six4, Hmga2, Vdr, Cthrc1, Mtss1, Pgr, Ctsh, Vegfa, Cxcr2, Ihh, Wnt6, Epha4, Tcap, Wnt9b, Ccdc40, Sox8, Etv4, Kif26b, Enah, Areg, Msx2, Ryr2, Col4a1, Fgf1, Sall1, Hhip, Notch4, Flt1
81	GO:1901654	BP	response to ketone	0.04185735783459577	47	Tgfb1, Fosl1, Foxo1, Hsd3b2, Ptgfr, Hsd3b5, Hsd3b3, Hsd3b1, Cftr, Tacr1, A2m, Abcb1b, Grin2b, Fibin, Ass1, Trim63, Tnc, Mtap, Agtr2, Foxp3, Esr2, Sox10, Tspo, Avpr1a, Hmbs, Pgr, Fdx1, Cyp11a1, Vegfa, Cps1, Igfals, Serpinf1, Sphk1, Nme1, Havcr1, Epha5, Spp1, Akr1c2, Akr1c3, Cbr1, Adamts1, Star, Plat, Gpt2, Hk1, Cdkn1a, Serpine1
82	GO:0009636	BP	response to toxic substance	3.572537711488961e-4	46	Apoe, Gsto2, Prdx5, Trpm6, Prdx3, Glrx, Dhfr, S100a8, S100a9, Gstm7, Hsd3b1, Asns, Abcb1b, Grin2b, Gucy2c, Duox1, Ass1, Tp53inp1, Sdc1, Esr2, Gpx2, Scn8a, Gsta4, Gpx1, Cyp11a1, Txndc2, Cps1, Slc47a2, Havcr1, Ltc4s, Hba-a3, Inhbb, Ptgs2, Ddc, Sod3, Gch1, Fancc, Slc17a3, Star, Ctrb1, Cdh1, Hp, Mt1, Mt3, Cdkn1a, Gstt1
83	GO:0051384	BP	response to glucocorticoid	3.572537711488961e-4	46	Pnliprp2, Cpn1, Tgfb1, H19, Ucp3, Fosl1, Scgb1a1, Pcsk1, Foxo1, Hsd3b2, Fabp4, Hsd3b5, Hsd3b3, Hsd3b1, A2m, Grin2b, Fibin, Ptgds, Il1rn, Ass1, Trim63, Orm1, Agtr2, Sdc1, Esr2, Avpr1a, Ucn2, Hmbs, Acsbg1, Cyp11a1, Vegfa, Hspd1, Cps1, Igfals, Serpinf1, Aldh3a1, Ptgs2, Areg, Sftpc, Sfrp4, Sftpd, Star, Plat, Hp, Cdkn1a, Serpine1
84	GO:0045765	BP	regulation of angiogenesis	5.14619559670174e-4	46	Gpr4, Htatip2, Chrna7, Smoc2, Adam12, Plk2, Sema5a, Sfrp2, Alox5, Hk2, Lep, Gadd45a, Tspan12, Adamts9, Aplnr, Creb3l1, Epha2, Pgk1, Tafa5, Hmga2, Adgrb1, Minar1, Ctsh, Vegfa, Cxcr2, Col4a3, Serpinf1, Tnfrsf12a, Sphk1, Fgf18, Brca1, Ngfr, Vash2, Lif, Ereg, Pf4, Rgcc, Ptk2b, Adamts1, Angpt2, Col4a2, Fgf1, Notch4, Serpine1, Hspb1, Flt1
85	GO:1901342	BP	regulation of vasculature development	6.890004643638519e-4	46	Gpr4, Htatip2, Chrna7, Smoc2, Adam12, Plk2, Sema5a, Sfrp2, Alox5, Hk2, Lep, Gadd45a, Tspan12, Adamts9, Aplnr, Creb3l1, Epha2, Pgk1, Tafa5, Hmga2, Adgrb1, Minar1, Ctsh, Vegfa, Cxcr2, Col4a3, Serpinf1, Tnfrsf12a, Sphk1, Fgf18, Brca1, Ngfr, Vash2, Lif, Ereg, Pf4, Rgcc, Ptk2b, Adamts1, Angpt2, Col4a2, Fgf1, Notch4, Serpine1, Hspb1, Flt1
86	GO:0046883	BP	regulation of hormone secretion	0.001431348119421221	46	Arntl, Sct, Kcnq1, Tcirg1, Nmb, Syt7, Gal, Glrx, Anxa5, Cftr, Tacr1, Alox5, Lep, Sri, Snap25, Edn3, Trpa1, C1qtnf12, Edn2, Oprk1, Agtr2, Pomc, Chga, Myh9, Hmga2, Vdr, Tspo, Avpr1a, Ccn3, Ucn2, Inha, Crhr1, Baiap3, Gdf9, Gpr39, Inhbb, Kiss1, Mpc2, Epha5, Lif, Spp1, Igfbp3, Inhba, Kalrn, Ildr1, Rab11fip1
87	GO:0043270	BP	positive regulation of ion transport	0.002384260931104744	46	Kcnq1, P2ry2, Trdn, Gal, Cd19, Glrx, Homer1, Gstm7, Hcn1, Trpc3, Cftr, Alox5, Lep, Sri, Dpp6, Grin2b, Cebpb, Edn3, Aplnr, Trpa1, Oprk1, G6pd, Ace2, Wnk3, Akap6, Tspo, Avpr1a, Slc38a3, Scn3b, Thy1, Cacng4, Trpv2, P2rx5, Slc9a3r1, Vmp1, Gpr39, Kmo, Tnfrsf11a, Ramp3, Actn2, Wnk2, Ryr2, Kcnn2, Camk2a, Serpine1, Pla2g1b
88	GO:0048167	BP	regulation of synaptic plasticity	0.004202004631018264	46	Ptpn5, Apoe, Sct, Rin1, Chrna7, Syt7, Sorcs3, Neurl1, Plk2, Grin2b, Rheb, Mgll, Snap25, Map1a, Slc24a2, Chrdl1, Lgmn, Adgrb1, Rasgrf1, Rab11a, Serpine2, Rims1, Epha4, Shisa9, Crhr1, Grin2c, Ptgs2, Kit, Ptk2b, Kalrn, App, Rab3a, Lzts1, Star, Erc2, Plat, Kcnn2, Camk2a, Neto1, Cbln1, Calb2, Egr2, Vgf, Ywhag, Prkar1b, Grid2ip
89	GO:0070371	BP	ERK1 and ERK2 cascade	0.006317373188232286	46	Apoe, Cib1, Chrna7, Tgfb1, Olr35, Nlrp6, F2rl1, Gbp1, Lmo3, Rasgrp1, Cd44, Bmp2, Epha2, Ace2, Rps6ka6, Fshr, Esr2, Myh9, Ptprr, Dusp6, Tlr9, Ctsh, Ephb1, Sema7a, Vegfa, Ccl20, Gpr55, Epha4, Slc9a3r1, Fgf18, Alox15, Slamf1, Atf3, Tnfrsf11a, Lif, Ramp3, Ptk2b, Nek10, Gpr183, Wnk2, App, Dusp4, Fgf1, Spry4, Necab2, Mt3
90	GO:0042063	BP	gliogenesis	0.021147449752694728	46	Apoe, Epm2a, Tgfb1, Bnip3, Sox6, Clcf1, Trpc4, Vcan, S100a8, S100a9, Rheb, Klf15, Sox5, Bmp2, Pou3f1, Mxra8, Dab1, Cdkn2b, Id2, Mycn, Sox10, Hmga2, Tspo, Bcl2l10, Hmbs, Cyp11a1, Gpc1, Serpine2, Epha4, Nfe2l1, Sox8, Gpr37l1, Crb1, Lif, Areg, Nf2, Ptk2b, Gpr183, Gap43, App, Fa2h, Adgrg1, Il34, Mt3, Egr2, Flt1
91	GO:0071375	BP	cellular response to peptide hormone stimulus	0.025177394834044464	46	Ptpre, Tgfb1, Vwa2, Foxo1, Anxa5, Car2, Hsd3b1, Reg1a, Pdk4, Lep, Lpin3, Trib3, Obp2a, Ass1, C1qtnf12, Orm1, Agtr2, Rangap1, Pgr, Rasgrf1, Cyp11a1, Erfe, Rab31, Cps1, Acsl6, Crhr1, Igfals, Cdc6, Inhbb, Myh7, Slc39a14, Actn2, Echdc3, Akr1c3, Star, Lpl, Plat, Cacna2d3, Camk2a, Gpt2, Bcar1, Irs3, Serpine1, Ywhag, Pla2g1b, Kl
92	GO:0048638	BP	regulation of developmental growth	0.03914706677363889	46	Apoe, Hamp, Il7, Sema5a, Reg1a, Lep, Plxna4, Sema3d, Mgll, Slc23a2, Gdf5, Mfsd2a, Zmpste24, G6pd, Fgf13, Dio3, Six4, Akap6, Lgmn, Ppara, Mapk11, Hmga2, Dusp6, Gamt, Rab11a, Sema7a, Vegfa, Rims1, Tnfrsf12a, Trpv2, P2rx5, Sh3pxd2b, Stc2, Hlx, Kcnk2, Bcl11a, Spp1, Myh6, Fgf9, Map3k13, App, Mt3, Cdkn1a, Rasal1, Serpine1, Acacb
93	GO:0007565	BP	female pregnancy	4.995633014917354e-4	45	Lipe, Tgfb1, Fosl1, Nlrp5, Prdx3, Hsd3b1, Lep, Tead4, Pzp, Adra2b, Il1rn, Timp1, Alas2, Ace2, Maged2, Sostdc1, Endou, Vdr, Slc38a3, Mmp3, Mmp12, Pgr, Ooep, Cyp11a1, Vegfa, Ihh, Serpine2, Igfbp5, Sphk1, Vmp1, Stc2, Ptgs2, Kiss1, Hsd17b7, Lif, Igfbp3, Plau, Akr1c3, Sfrp4, Angpt2, Cdh1, Cbs, Serpine1, Hspb1, Flt1
94	GO:0070372	BP	regulation of ERK1 and ERK2 cascade	0.0030498825803251415	45	Apoe, Cib1, Chrna7, Tgfb1, Olr35, Nlrp6, F2rl1, Gbp1, Lmo3, Rasgrp1, Cd44, Bmp2, Epha2, Ace2, Rps6ka6, Fshr, Esr2, Myh9, Ptprr, Dusp6, Tlr9, Ephb1, Sema7a, Vegfa, Ccl20, Gpr55, Epha4, Slc9a3r1, Fgf18, Alox15, Slamf1, Atf3, Tnfrsf11a, Lif, Ramp3, Ptk2b, Nek10, Gpr183, Wnk2, App, Dusp4, Fgf1, Spry4, Necab2, Mt3
95	GO:0050727	BP	regulation of inflammatory response	0.012595647629564189	45	Gpr4, Apoe, Chrna7, Hamp, Nlrp6, Enpp3, Scgb1a1, Pik3ap1, Nlrp10, S100a8, S100a9, Fabp4, Alox5, Lpcat3, Mgll, Cd44, Cebpb, C1qtnf12, Tnc, Foxp3, Gpx2, Ppara, Lgals2, Ccn3, Apoa1, Acp5, Tlr9, Rora, Gpx1, Sema7a, Hspd1, Serpinf1, Nfe2l1, Sphk1, Alox15, Ptgs2, Tnfrsf11a, Tnfsf18, Il2ra, Bcl6, App, Lpl, Fanca, Ggt1, Serpine1
96	GO:1903532	BP	positive regulation of secretion by cell	0.01991716288928479	45	Sct, P2ry2, Tgfb1, Nmb, Syt7, Gal, Pcsk1, Glrx, F2rl1, Cftr, Tacr1, Lep, Sri, Grin2b, Ttn, Bmp2, Sdc4, Snap25, Edn3, Ncs1, Trpa1, C1qtnf12, Edn2, Oprk1, Sdcbp, Gata1, Sdc1, Myh9, Vdr, Avpr1a, Plcd1, Crhr1, Sphk1, Baiap3, Gpr39, Kmo, Inhbb, Kiss1, Mpc2, Tnfrsf11a, Lif, Spp1, Rgcc, Ildr1, Rab3a
97	GO:0046486	BP	glycerolipid metabolic process	0.02829830584553571	45	Apoc1, Apoe, Pnliprp2, Lipe, Rab38, Scd, Hsd3b1, Fam126a, Lpcat3, Mgll, Lpin3, Agpat2, Gpat2, Pgap4, Mfsd2a, Phka1, Dgkk, Plb1, Gpd1, Gpihbp1, Apoa1, Plcd1, Plscr1, Gpx1, Abhd5, Plin5, Mogat1, Cps1, Acsl3, Acsl6, Pgs1, Alox15, Pcyt2, Gal3st1, Inpp5j, Cds1, Gpat3, Plaat1, Acsl1, Lpl, Lipg, Lpcat2, Pnpla1, Scarb1, Pla2g1b
98	GO:0007178	BP	transmembrane receptor protein serine/threonine kinase signaling pathway	0.032231777264014404	45	Dact2, Tgfb1, Cdkn1c, Folr1, Sfrp2, Bmpr1b, Ppm1l, Fermt1, Bmp2, Crb2, Fkbp1a, Gdf5, Cdkn2b, Sdcbp, Chrdl1, Bmp15, Crim1, Sostdc1, Ppara, Scx, Tmprss6, Amh, Amhr2, Ccn3, Fstl3, Runx2, Inha, Tmem100, Fam83g, Myocd, Gdf9, Inhbb, Grem2, Fgf9, Itga8, Sfrp4, Msx2, Inhba, Ucma, Gdf10, Comp, Lox, Onecut2, Ly6g6e, Hspa1a
99	GO:0051346	BP	negative regulation of hydrolase activity	0.03451240184527416	45	Apoc1, Epm2a, Prdx5, LOC100910107, Prdx3, Sfrp2, Ptx3, A2m, Klrk1, Pzp, Cd44, Crb2, Spint3, Eppin, Wfdc8, Wfdc10a, Fkbp1a, Dhcr24, Timp1, Plxnb3, Crim1, Serpina1, Serpina5, Serpina11, Angptl4, Apoa1, Anxa2, Snap91, Ltf, Gpx1, Vegfa, Plin5, Serpine2, Pecam1, Wnt9a, Serpinf1, Ptgs2, Serpinc1, Slc39a14, Mastl, App, Bag4, Camk2a, Mt3, Serpine1
100	GO:0032102	BP	negative regulation of response to external stimulus	0.048096482682219145	45	Apoe, Klk8, Chrna7, Hamp, Nlrp6, Enpp3, Sema5a, Anxa5, Alox5, A2m, Lep, Ctnna2, Sema3d, Lpcat3, Klrk1, Cd44, C1qtnf12, Foxp3, Gpx2, Tafa5, Ppara, Ccn3, Trib1, Apoa1, Acp5, Ubash3b, Mmp12, Anxa2, Rora, Ltf, Gpx1, Sema7a, Serpine2, Epha4, Serpinf1, Sec14l1, Susd4, Spp1, Plau, Il2ra, Phldb2, Cd96, Angpt2, Rnf125, Serpine1
101	GO:0072593	BP	reactive oxygen species metabolic process	2.5380178112339664e-5	44	Tgfb1, Bnip3, Prdx5, Prdx3, Foxo1, F2rl1, Dhfr, Pdk4, Alox5, Hk2, Lep, Gadd45a, Tigar, Duox1, G6pd, Mycn, Immp2l, Esr2, Ppara, Tspo, Adgrb1, Acp5, Mmp3, Gpx1, Plin5, Hspd1, Noxo1, Sh3pxd2b, Hba-a3, Brca1, Ngfr, Sod3, Gch1, Ptk2b, Plau, Fancc, Akr1c3, Akr1c1, Cbr1, App, Hp, Mt3, Cbs, Cdkn1a
102	GO:0046942	BP	carboxylic acid transport	0.0021879310366286165	44	Abcc6, Epm2a, P2ry2, Slc6a5, Nmb, Slc22a6, Folr1, Trpc4, Slc16a4, Lep, Abcb1b, Grin2b, Slc6a6, Slc13a3, Slc23a2, Il1rn, Slc26a7, Agtr2, Ace2, Avpr1a, Slc38a3, Aqp9, Slco2a1, Slc6a20a, Nfe2l1, Slc16a6, Slc13a2, Slc9a3r1, Slc16a5, Proca1, Slc13a5, Slc16a11, Kmo, Ptgs2, Mpc2, Tnfrsf11a, Lrrc8c, Abcc4, Sfxn1, Slc17a3, Slc51a, Slc25a15, Slc10a2, Pla2g1b
103	GO:0007611	BP	learning or memory	0.010458836961440015	44	Apoe, Sct, Rin1, Klk8, Epm2a, Chrna7, Kcnk4, Sorcs3, Fosl1, Pde4d, Plk2, Gpr88, Kcnab1, Tacr1, Grin2b, Snap25, Cebpb, Il1rn, Map1a, Slc24a2, Oprk1, Fgf13, Ptchd1, Aff2, Prkar2b, Esr2, Lgmn, Pde1b, Chst10, Crhr1, Serpinf1, Kcnk2, Ptgs2, Kit, Atp8a1, Itga8, Dcdc2, Kalrn, Rcan1, App, Neto1, Egr2, Cux2, Prkar1b
104	GO:0040013	BP	negative regulation of locomotion	0.01459309556701334	44	Apoe, Wnt11, Tgfb1, Sema5a, Tmigd3, Sfrp2, Gadd45a, Sema3d, Klrk1, Adamts9, Frmd5, Eppin, Il1rn, Clic4, Tp53inp1, Timp1, Plxnb3, Tafa5, Nav3, Myh9, Ptprr, Ccn3, Trib1, Adgrb1, Thy1, Dnaja4, Sema7a, Igfbp5, Epha4, Serpinf1, Cd300a, Slc9a3r1, Myocd, Ngfr, Kiss1, Ppargc1a, Igfbp3, Rgcc, Phldb2, Angpt2, Cdh1, Adgrg1, Marveld3, Serpine1
105	GO:0007568	BP	aging	0.03493563182492003	44	Ptpn5, Apoe, P2ry2, Tgfb1, Ucp3, Hamp, Cdkn1c, Gfra1, Pde4d, Glrx, Hcn1, Cftr, Gss, Ass1, Cdkn2b, Timp1, Amh, Vdr, Tspo, Avpr1a, Gpx1, Vegfa, Igfbp5, Igfals, Serpinf1, Top2a, Aldh3a1, Kmo, Ptgs2, Ppargc1a, Ddc, Igfbp3, Myh6, Myh7, Kcnma1, Tp63, Comp, Col4a2, Hp, Ggt1, Gstt1, Hspb1, Flt1, Kl
106	GO:0010720	BP	positive regulation of cell development	0.04112196790107385	44	Apoe, Bnc1, Cib1, Tgfb1, Clcf1, Neurl1, Sema5a, Cftr, Plxna4, Rheb, Bmp2, Aurka, Plxnb3, Bex1, Id2, Sox10, Tspo, Plxnc1, Trib1, Apoa1, Khdc3, Snap91, Dixdc1, Rab11a, Sema7a, Vegfa, Serpine2, Epha4, Serpinf1, Tnfrsf12a, Trpv2, Sox8, Gdf9, Kit, Lif, Bcl11a, Map3k13, Kalrn, Star, Il34, Lims1, Egr2, Cux2, Flt1
107	GO:0042445	BP	hormone metabolic process	2.5380178112339664e-5	43	Lipe, Pcsk6, Pnlip, Dhcr7, Chst8, Gal, Crym, Pcsk1, Hsd3b2, Lrat, Hsd3b5, Hsd3b3, Hsd3b1, Lep, Bmp2, Duox1, Dhrs9, H6pd, Zmpste24, Atp6ap2, Slc16a2, Fshr, Dio3, Plb1, Dio2, Tg, Rbp2, Fdx1, Cyp11a1, Chst10, Stc2, Hsd17b1, Hsd11b1, Hsd17b7, Ppargc1a, Spp1, Kcnma1, Akr1c2, Akr1c3, Akr1c1, Star, Hsd17b2, Scarb1
108	GO:0022898	BP	regulation of transmembrane transporter activity	0.0010479207357704942	43	Kcnq1, Hamp, Fxyd5, Cnih2, Fxyd7, Trdn, Gal, Pde4d, Glrx, Homer1, Kcnab1, Gstm7, Hcn1, Cftr, Alox5, Sri, Dysf, Stom, Fkbp1a, Ptpn3, Ace2, Fgf13, Wnk3, Akap6, Tlr9, Scn3b, Rasgrf1, Shisa9, Crhr1, Cacng4, Slc9a3r1, Vmp1, Ppargc1a, Kcnrg, Ptk2b, Actn2, Wnk2, Hecw1, Ryr2, App, Neto1, Hk1, Rph3a
109	GO:0032409	BP	regulation of transporter activity	0.002384260931104744	43	Kcnq1, Hamp, Fxyd5, Cnih2, Fxyd7, Trdn, Gal, Pde4d, Glrx, Homer1, Kcnab1, Gstm7, Hcn1, Cftr, Alox5, Sri, Dysf, Stom, Fkbp1a, Ptpn3, Ace2, Fgf13, Wnk3, Akap6, Tlr9, Scn3b, Rasgrf1, Shisa9, Crhr1, Cacng4, Slc9a3r1, Vmp1, Ppargc1a, Kcnrg, Ptk2b, Actn2, Wnk2, Hecw1, Ryr2, App, Neto1, Hk1, Rph3a
110	GO:0061448	BP	connective tissue development	0.0027183614606062887	43	Gpr4, Scube2, Tgfb1, Sox6, Sfrp2, Bmpr1b, Lep, Sox5, Cd44, Frzb, Slc25a25, Bmp2, Prrx2, Gdf5, Runx3, Zmpste24, Timp1, Id2, Mycn, Chadl, Scx, Hmga2, Wnt10b, Ccn3, Runx2, Ihh, Wnt9a, Sox8, Sh3pxd2b, Fgf18, Ppargc1a, Ebf2, Fgf9, Slc39a14, Loxl2, Mkx, Pitx1, Msx2, Comp, Lox, Maf, Cbs, Rflna
111	GO:0051271	BP	negative regulation of cellular component movement	0.006679478450317208	43	Apoe, Wnt11, Tgfb1, Actn4, Cnih2, Tmigd3, Sfrp2, Gadd45a, Klrk1, Adamts9, Frmd5, Eppin, Il1rn, Clic4, Tp53inp1, Timp1, Plxnb3, Tafa5, Nav3, Myh9, Ptprr, Ccn3, Trib1, Adgrb1, Thy1, Dnaja4, Igfbp5, Epha4, Serpinf1, Cd300a, Slc9a3r1, Myocd, Ngfr, Kiss1, Ppargc1a, Igfbp3, Rgcc, Phldb2, Angpt2, Cdh1, Adgrg1, Marveld3, Serpine1
112	GO:0031099	BP	regeneration	0.0073925067093535135	43	Apoe, Klk8, Tgfb1, Hamp, Igf2r, Folr1, Vcan, Dhfr, Cftr, Reg1a, Dysf, Aurka, Cebpb, Tnc, Ptpn3, Orm1, Alas2, Gata1, Tspo, Wnt10b, Ccn3, Apoa1, Ucn2, Hmbs, Thy1, Gpx1, Ihh, Epha4, P2rx5, Sgca, Tec, Lif, Txk, Nefh, Spp1, Plau, Gap43, Angpt2, Hp, Ggt1, Cdkn1a, Serpine1, Flt1
113	GO:0016042	BP	lipid catabolic process	0.00779945097082024	43	Apoc1, Apoe, Pnliprp2, Sct, Lipe, Aig1, Pnlip, Smpd1, Plpp1, Lep, Mgll, Lpin3, Obp2a, Crat, Acot7, Cpt2, Mfsd2a, Decr1, Plb1, Acot2, Gpihbp1, Apoa1, Plcd1, Abhd5, Plin5, Cps1, Idh1, Hsd11b1, Spp1, Akr1c3, Pla1a, Plaat1, Cbr1, Lpl, Enpp6, Lipg, Acaa2, Mt3, Tysnd1, Pnpla1, Scarb1, Pla2g1b, Acacb
114	GO:0015833	BP	peptide transport	0.011570320290318256	43	Arntl, Sct, Kcnq1, Tcirg1, Syt7, Gal, Glrx, Anxa5, S100a8, S100a9, Car2, Cftr, Alox5, Lep, Sri, Pclo, Slc13a3, Snap25, Il1rn, Edn3, Trpa1, C1qtnf12, Cdh17, Slc16a2, Chga, Myh9, Hmga2, Avpr1a, Ccn3, Crhr1, Baiap3, Slc9a3r1, Gpr39, Inhbb, Kiss1, Mpc2, Ildr2, Epha5, Lif, Abcc4, Kalrn, Ildr1, Vgf
115	GO:0009612	BP	response to mechanical stimulus	0.016039299235398805	43	Lrp11, Kcnq1, Wnt11, Tgfb1, Bnip3, Kcnk4, Fosl1, Tacr1, Asns, Grm8, Gadd45a, Grin2b, Ttn, Bmp2, Gdf5, Trpa1, Tnc, Oprk1, Scx, Myh9, Mmp3, Chrna5, Vegfa, Ihh, Serpine2, Tcap, Actg1, Kcnk2, Ptgs2, Tlr5, Kit, Tmem150c, Ptk2b, Slitrk6, Sftpc, Mkx, Ryr2, Kalrn, Rcan1, Angpt2, Hspa1a, Serpine1, Hspb1
116	GO:0070661	BP	leukocyte proliferation	0.020763644282509697	43	Hells, Tcirg1, Tgfb1, Itgad, Enpp3, Scgb1a1, Gal, Clcf1, Il27, Cd19, Il7, Vtcn1, F2rl1, Vav3, Tacr1, Lep, Il23r, Il12rb2, Rasgrp1, Cd44, Sdc4, Cebpb, Fkbp1a, Ctps1, Foxp3, Cd3e, Tlr9, Hspd1, Ihh, Zap70, Ikzf3, Cd300a, Atad5, Slamf1, Tnfsf18, Gpr183, Il2ra, Bcl6, Sftpd, Il34, Btnl2, Cdkn1a, Clec4g
117	GO:0051962	BP	positive regulation of nervous system development	0.02483478026784864	43	Apoe, Tgfb1, Clcf1, Neurl1, Sema5a, Lrtm2, Plxna4, Clstn3, Rheb, Flrt3, Bmp2, Plxnb3, Bex1, Id2, Sox10, Tspo, Plxnc1, Adgrb1, Khdc3, Snap91, Ephb1, Dixdc1, Rab11a, Sema7a, Vegfa, Serpine2, Epha4, Serpinf1, Tnfrsf12a, Trpv2, Sox8, Kit, Lif, Bcl11a, Slitrk6, Map3k13, Kalrn, Star, Cbln1, Il34, Egr2, Cux2, Flt1
118	GO:0006814	BP	sodium ion transport	1.0470281654124007e-4	42	Kcnq1, Slc6a5, Tgfb1, Fxyd5, Nkain2, Fxyd7, Atp4a, Glrx, Hcn1, Cftr, Slc4a5, Slc6a6, Slc13a3, Slc23a2, Stom, Nkain1, Ptpn3, Slc24a2, Fgf13, Maged2, Wnk3, Slc24a4, Scn8a, Slc38a3, Scn3b, Slc6a20a, Asic4, Serpine2, Slc13a2, Slc9a3r1, Slc13a5, Slc4a4, Atp12a, Slc28a3, Wnk2, Slc17a3, Hecw1, Atp4b, Slc20a2, Slc10a2, Neto1, Naglt1
119	GO:0032412	BP	regulation of ion transmembrane transporter activity	9.386503637762682e-4	42	Kcnq1, Hamp, Fxyd5, Cnih2, Fxyd7, Trdn, Gal, Pde4d, Glrx, Homer1, Kcnab1, Gstm7, Hcn1, Cftr, Alox5, Sri, Dysf, Stom, Fkbp1a, Ptpn3, Fgf13, Wnk3, Akap6, Tlr9, Scn3b, Rasgrf1, Shisa9, Crhr1, Cacng4, Slc9a3r1, Vmp1, Ppargc1a, Kcnrg, Ptk2b, Actn2, Wnk2, Hecw1, Ryr2, App, Neto1, Hk1, Rph3a
120	GO:0044262	BP	cellular carbohydrate metabolic process	0.00457331812212611	42	Epm2a, B3gnt8, Pgam1, Foxo1, Pdk4, Hk2, Lep, Tigar, Prkag2, Dysf, Sord, Obp2a, C1qtnf12, Zmpste24, Phka1, Pomc, Pygl, Ppara, Myh9, Avpr1a, Rora, Plcd1, Erfe, B3gnt7, Idh1, Nfe2l1, Hsd11b1, Ppargc1a, Inpp5j, Igfbp3, Ptk2b, Pfkfb3, Ppp1r3g, B3gnt3, Isyna1, Pcdh12, Gpt2, Hk1, Hkdc1, Tff3, B3gnt4, Acacb
121	GO:0070588	BP	calcium ion transmembrane transport	0.013300177722352202	42	Tgfb1, Trpm1, Trdn, Trpm6, Slc35g1, Cd19, Pde4d, Trpc4, Anxa5, Gstm7, Anxa9, Trpc3, Sri, Grin2b, Dysf, Slc25a25, Ncs1, Fkbp1a, Aplnr, Trpa1, Slc24a2, Atp2b3, G6pd, Slc24a4, Akap6, Grin3b, Ubash3b, Tlr9, Anxa2, Thy1, Crhr1, Cacng4, Trpv2, P2rx5, Grin2c, Vmp1, Gpr39, Ramp3, Ptk2b, Ryr2, Cacna2d3, Bhlha15
122	GO:0014074	BP	response to purine-containing compound	3.522115776892041e-5	41	Kcnq1, P2ry2, Fosl1, Pde4d, Gstm7, Hcn1, Hsd3b1, Trpc3, Cftr, Duox1, Ass1, Fkbp1a, Trpa1, Gata1, Sdc1, Akap6, Gpd1, Wnt10b, Mmp19, Aqp9, Fdx1, Cyp11a1, Hspd1, Cps1, Igfbp5, Sphk1, P2rx5, Nme1, Aldh3a1, Inhbb, Ptgs2, Ppargc1a, Areg, Ptk2b, Sftpc, Ryr2, App, Star, Plat, Serpine1, Vgf
123	GO:0090287	BP	regulation of cellular response to growth factor stimulus	0.004009251946699024	41	Smoc2, Tgfb1, Cdkn1c, Cadm4, Folr1, Sfrp2, Tspan12, Fermt1, Bmp2, Crb2, Fkbp1a, Gdf5, Creb3l1, Cdkn2b, Sdcbp, Chrdl1, Agtr2, Crim1, Sostdc1, Ppara, Tmprss6, Fstl3, Runx2, Gpc1, Myocd, Fgf18, Ngfr, Grem2, Adamts3, Fgf9, Itga8, Sfrp4, Msx2, Lox, Fgf1, Onecut2, Spry4, Hhip, Mt3, Hspa1a, Wasf1
124	GO:0010631	BP	epithelial cell migration	0.010206383226035847	41	Apoe, Cib1, Smoc2, Tgfb1, Plk2, Sema5a, Tacr1, Gadd45a, Adamts9, Fermt1, Epha2, Epb41l4b, Edn2, Lgmn, Myh9, Ptprr, Ccn3, Adgrb1, Apoa1, Ctsh, Dnaja4, Gpx1, Rab11a, Vegfa, Pecam1, Serpinf1, Fgf18, Ptgs2, Kit, Rgcc, Ptk2b, Loxl2, Insl3, Angpt2, Fgf1, Hbegf, Bcar1, Marveld3, Scarb1, Serpine1, Hspb1
125	GO:0090132	BP	epithelium migration	0.011051848886009944	41	Apoe, Cib1, Smoc2, Tgfb1, Plk2, Sema5a, Tacr1, Gadd45a, Adamts9, Fermt1, Epha2, Epb41l4b, Edn2, Lgmn, Myh9, Ptprr, Ccn3, Adgrb1, Apoa1, Ctsh, Dnaja4, Gpx1, Rab11a, Vegfa, Pecam1, Serpinf1, Fgf18, Ptgs2, Kit, Rgcc, Ptk2b, Loxl2, Insl3, Angpt2, Fgf1, Hbegf, Bcar1, Marveld3, Scarb1, Serpine1, Hspb1
126	GO:2000146	BP	negative regulation of cell motility	0.012026091256516842	41	Apoe, Wnt11, Tgfb1, Tmigd3, Sfrp2, Gadd45a, Klrk1, Adamts9, Frmd5, Eppin, Il1rn, Clic4, Tp53inp1, Timp1, Plxnb3, Tafa5, Nav3, Myh9, Ptprr, Ccn3, Trib1, Adgrb1, Thy1, Dnaja4, Igfbp5, Epha4, Serpinf1, Cd300a, Slc9a3r1, Myocd, Ngfr, Kiss1, Ppargc1a, Igfbp3, Rgcc, Phldb2, Angpt2, Cdh1, Adgrg1, Marveld3, Serpine1
127	GO:0051604	BP	protein maturation	0.013337481868848254	41	Klk13, Cpn1, Klk7, Anpep, Perp, Pcsk6, Nlrp6, LOC100910107, Pcsk1, Tspan33, Lpcat3, Chac1, Mmel1, Dhcr24, Zmpste24, Atp6ap2, Pgk1, Immp2l, Lgmn, Myh9, Dhh, Angptl8, Anxa2, Ctsh, Ihh, Serpine2, Ecel1, Il1r2, Adamts3, Plau, Tll1, Plat, Comp, Sec11c, Cdh1, Hp, Notch4, Tysnd1, Ggt1, Tspan15, Serpine1
128	GO:0090130	BP	tissue migration	0.013858064700102004	41	Apoe, Cib1, Smoc2, Tgfb1, Plk2, Sema5a, Tacr1, Gadd45a, Adamts9, Fermt1, Epha2, Epb41l4b, Edn2, Lgmn, Myh9, Ptprr, Ccn3, Adgrb1, Apoa1, Ctsh, Dnaja4, Gpx1, Rab11a, Vegfa, Pecam1, Serpinf1, Fgf18, Ptgs2, Kit, Rgcc, Ptk2b, Loxl2, Insl3, Angpt2, Fgf1, Hbegf, Bcar1, Marveld3, Scarb1, Serpine1, Hspb1
129	GO:0071241	BP	cellular response to inorganic substance	0.018356070275073695	41	Bnip3, Syt7, Smpd1, Dlg2, Foxo1, Anxa5, Fabp4, Hsd3b1, Tigar, Grin2b, Syt13, Trpa1, Clic4, Id2, Lgmn, Tspo, Fstl3, Tlr9, Hmbs, Gsta4, Cyp11a1, Serpinf1, Nfe2l1, Slc13a5, Alox15, Hsd17b1, Gpr39, Inhbb, Ptgs2, Ppargc1a, Sftpc, Akr1c3, App, Star, Bcar1, Cdh1, Hsd17b2, Mt1, Mt3, Rasal1, Serpine1
130	GO:0046661	BP	male sex differentiation	1.3065496106114664e-4	40	Mir202, Kcnq1, Utf1, Gfra1, Hsd3b2, Sfrp2, Hsd3b1, Cftr, Rad21l1, Dhcr24, Nr0b1, Gata1, Msh2, Fshr, Sdc1, Esr2, Six4, Amh, Hmga2, Amhr2, Dhh, Fstl3, Tlr9, Cyp11a1, Inha, Wnt9b, Sox8, Tex19.1, Inhbb, Lhx9, Tlr5, Kit, Fgf9, Akr1c3, Inhba, Insl3, Star, Tex15, Fanca, Adgrg1
131	GO:0045444	BP	fat cell differentiation	0.001412035512774341	40	Arntl, Tgfb1, Bnip3, Scd, Foxo1, Sfrp2, Fabp4, Alox5, Lep, Lmo3, Dysf, Frzb, Trib3, Bmp2, Cebpb, Id2, Trib2, Dio2, Hmga2, Wnt10b, Angptl8, Rora, Gpx1, Vegfa, Sox8, Sh3pxd2b, Inhbb, Ptgs2, Lamb3, Lrrc8c, Cds1, Ebf2, Mkx, Msx2, Mrap, Gdf10, Lpl, Egr2, Mmp11, Medag
132	GO:0006936	BP	muscle contraction	0.023476179156073845	40	Kcnq1, Pde4d, Homer1, Tacr1, Sri, Kcnj8, Adra2b, Ttn, Edn3, Fkbp1a, Trpa1, Myom3, Trim63, Edn2, Ace2, Fgf13, Chga, Akap6, Scn3b, Pgr, Chrnb4, Chrna3, Tcap, Sphk1, Myh1, Myocd, Chrnb1, Sgcd, Ptgs2, Kit, Pgam2, Myh6, Myh7, Kcnma1, Actn2, Ryr2, Comp, Kcnn2, Ctnna3, Flt1
133	GO:1901617	BP	organic hydroxy compound biosynthetic process	2.5743233786194305e-4	39	Apoe, Chrna7, Oca2, Dhcr7, Cyb5r2, Dhfr, Hsd3b1, Gpr37, Cftr, Lep, Lpcat3, Sptlc3, Bmp2, H6pd, Dhcr24, G6pd, Agtr2, Sptssa, Myh9, Sqle, Apoa1, Plcd1, Cyp11a1, Sphk1, Alox15, Hsd17b1, Hsd17b7, Ddc, Gch1, Ptk2b, Idi1, Akr1c3, Sptlc1, Star, Msmo1, Isyna1, Fgf1, Mvd, Kl
134	GO:0016485	BP	protein processing	0.0012203875210749279	39	Klk13, Cpn1, Klk7, Anpep, Perp, Pcsk6, Nlrp6, LOC100910107, Pcsk1, Lpcat3, Chac1, Mmel1, Dhcr24, Zmpste24, Atp6ap2, Pgk1, Immp2l, Lgmn, Myh9, Dhh, Angptl8, Anxa2, Ctsh, Ihh, Serpine2, Ecel1, Il1r2, Adamts3, Plau, Tll1, Plat, Comp, Sec11c, Cdh1, Hp, Notch4, Tysnd1, Ggt1, Serpine1
135	GO:0030336	BP	negative regulation of cell migration	0.014053842681718703	39	Apoe, Wnt11, Tgfb1, Tmigd3, Sfrp2, Gadd45a, Klrk1, Adamts9, Il1rn, Clic4, Tp53inp1, Timp1, Plxnb3, Tafa5, Nav3, Myh9, Ptprr, Ccn3, Trib1, Adgrb1, Thy1, Dnaja4, Igfbp5, Epha4, Serpinf1, Cd300a, Slc9a3r1, Myocd, Ngfr, Kiss1, Ppargc1a, Igfbp3, Rgcc, Phldb2, Angpt2, Cdh1, Adgrg1, Marveld3, Serpine1
136	GO:0046651	BP	lymphocyte proliferation	0.031799951240424854	39	Hells, Tgfb1, Itgad, Scgb1a1, Gal, Clcf1, Il27, Cd19, Il7, Vtcn1, Vav3, Tacr1, Lep, Il23r, Il12rb2, Rasgrp1, Cd44, Sdc4, Cebpb, Fkbp1a, Ctps1, Foxp3, Cd3e, Tlr9, Hspd1, Ihh, Zap70, Ikzf3, Cd300a, Atad5, Slamf1, Tnfsf18, Gpr183, Il2ra, Bcl6, Sftpd, Btnl2, Cdkn1a, Clec4g
137	GO:0032943	BP	mononuclear cell proliferation	0.036214232310461385	39	Hells, Tgfb1, Itgad, Scgb1a1, Gal, Clcf1, Il27, Cd19, Il7, Vtcn1, Vav3, Tacr1, Lep, Il23r, Il12rb2, Rasgrp1, Cd44, Sdc4, Cebpb, Fkbp1a, Ctps1, Foxp3, Cd3e, Tlr9, Hspd1, Ihh, Zap70, Ikzf3, Cd300a, Atad5, Slamf1, Tnfsf18, Gpr183, Il2ra, Bcl6, Sftpd, Btnl2, Cdkn1a, Clec4g
138	GO:0042180	BP	cellular ketone metabolic process	4.0492324412123973e-4	38	Apoc1, Hsd3b5, Hsd3b1, Pdk4, Prkag2, Trib3, Bmp2, Obp2a, Dhrs9, H6pd, Mfsd2a, Mid1ip1, Ppara, Avpr1a, Gpd1, Apoa1, Cyp11a1, Erfe, Plin5, Coq10b, Nfe2l1, Fdxr, Afmid, Brca1, Hsd17b1, Kmo, Ptgs2, Ppargc1a, Kcnma1, Akr1c2, Akr1c3, Akr1c1, Cbr1, Star, Aadat, Aifm2, Tysnd1, Acacb
139	GO:0005996	BP	monosaccharide metabolic process	0.004552577090225612	38	Kcnq1, Gdpgp1, Gsto2, Foxo1, Pdk4, Hk2, Lep, Tigar, Sord, Slc23a2, Obp2a, Chst1, H6pd, Fuca1, C1qtnf12, Zmpste24, G6pd, Pgk1, Pomc, Ppara, Avpr1a, Gpd1, Rora, Erfe, Uxs1, Nfe2l1, Atf3, Ppargc1a, Pgam2, Igfbp3, Slc39a14, Pfkfb3, Ppp1r3g, Gpt2, Hk1, Hkdc1, Tff3, Acacb
140	GO:0060560	BP	developmental growth involved in morphogenesis	0.012026091256516842	38	Apoe, Wnt11, Tgfb1, S1pr1, Sema5a, Sfrp2, Dclk1, Reg1a, Plxna4, Sema3d, Mgll, Flrt3, Slc23a2, Aurka, Edn3, Tnc, Sh3gl2, Edn2, Fgf13, Six4, Cadm1, Rab11a, Sema7a, Vegfa, Rims1, Tnfrsf12a, Trpv2, Kif26b, Areg, Bcl11a, Spp1, Map3k13, App, Fgf1, Sall1, Mt3, Wasf1, Rasal1
141	GO:0002790	BP	peptide secretion	0.03463641235743449	38	Arntl, Sct, Kcnq1, Tcirg1, Syt7, Gal, Glrx, Anxa5, S100a8, S100a9, Cftr, Alox5, Lep, Sri, Pclo, Snap25, Il1rn, Edn3, Trpa1, C1qtnf12, Slc16a2, Chga, Myh9, Hmga2, Avpr1a, Ccn3, Crhr1, Baiap3, Gpr39, Inhbb, Kiss1, Mpc2, Ildr2, Epha5, Lif, Kalrn, Ildr1, Vgf
142	GO:0006575	BP	cellular modified amino acid metabolic process	4.2435391821153935e-5	37	Ckm, Ethe1, Gsto2, Vnn3, Folr1, Crym, Dhfr, Bhmt, Gstm7, Mthfd2, Lpcat3, Pcyox1, Aldh1l1, Gss, Bbox1, Duox1, Chac1, Crat, Ass1, Cpt2, Mfsd2a, Slc16a2, G6pd, Dio3, Dio2, Tg, Gamt, Gsta4, Plscr1, Gpx1, Idh1, Nfe2l1, Pipox, Gch1, Gstt3, Ggt1, Gstt1
143	GO:0048469	BP	cell maturation	5.536703337909447e-4	37	Bnc1, Tgfb1, Tdrd1, Cdkn1c, Dlg2, Cftr, Aurka, Runx3, Npr2, G6pd, Id2, Esr2, Sox10, Rnd1, Ntn4, Angptl8, Pgr, Gldn, Vegfa, Runx2, Farp2, Ihh, Trim58, Sox8, Gdf9, Kif14, Ereg, Bcl11a, Ptk2b, Kcnma1, Mastl, Map3k13, App, Insl3, Cdkn1a, Brca2, Bhlha15
144	GO:0001763	BP	morphogenesis of a branching structure	0.0022221619485566805	37	Tgfb1, Sema5a, Sfrp2, Cd44, Bmp2, Eya1, Clic4, Epha2, Tnc, Agtr2, Mycn, Six4, Sox10, Hmga2, Vdr, Ntn4, Pgr, Ctsh, Vegfa, Ihh, Wnt6, Wnt9b, Sox8, Etv4, Areg, Bcl11a, Msx2, Map3k13, Tp63, Col4a1, Fgf1, Sall1, Cdh1, Hhip, Notch4, Col13a1, Flt1
145	GO:0002064	BP	epithelial cell development	0.0025118723298184417	37	Gpr4, Dact2, Arntl, Tgfb1, Nphs1, Pde4d, F2rl1, Cftr, Slc4a5, Tigar, Abcb1b, Rheb, Clic4, Epha2, Gata1, Foxp3, Bmp15, Pof1b, Fshr, Sdc1, Esr2, Ccdc88c, Bcl11b, Pgr, Gpx1, Vegfa, Ihh, Pecam1, Sox8, Nphs2, Tp63, Onecut2, Cdh1, Cdsn, Col18a1, Notch4, Cdkn1a
146	GO:0071248	BP	cellular response to metal ion	0.003048142981225052	37	Bnip3, Syt7, Smpd1, Dlg2, Anxa5, Fabp4, Hsd3b1, Tigar, Grin2b, Syt13, Clic4, Id2, Lgmn, Tspo, Fstl3, Tlr9, Hmbs, Gsta4, Cyp11a1, Serpinf1, Nfe2l1, Slc13a5, Alox15, Hsd17b1, Gpr39, Inhbb, Ptgs2, Ppargc1a, Akr1c3, App, Star, Cdh1, Hsd17b2, Mt1, Mt3, Rasal1, Serpine1
147	GO:0045165	BP	cell fate commitment	0.013076545132265709	37	Wnt11, Sox6, Il7, Sfrp2, Tead4, Sox5, Bmp2, Lhx3, Gata5, Eya1, Casz1, Tox, Gata1, Chrdl1, Fgf13, Id2, Sostdc1, Bcl11b, Dhh, Wnt10b, Runx2, Wnt10a, Ihh, Wnt6, Wnt9a, Nfe2l1, Wnt9b, Sox8, Sh3pxd2b, Epop, Ly9, Atf3, Tnfsf18, Ebf2, Pitx1, Gap43, Onecut2
148	GO:0110148	BP	biomineralization	2.5380178112339664e-5	36	Abcc6, Wnt11, Tcirg1, Tgfb1, S1pr1, Foxo1, Bmpr1b, Sgms2, Cftr, Alox5, Lep, Snx10, Bmp2, Cebpb, Zmpste24, Gata1, Ppara, Wnt10b, Mtss1, Wnt6, Asgr2, Notum, Fam20a, Alox15, Ptgs2, Spp1, Ptk2b, Msx2, Omd, Ucma, Comp, Lox, Tspear, Rflna, Tmem119, Kl
149	GO:0046660	BP	female sex differentiation	3.522115776892041e-5	36	Bmpr1b, Hsd3b1, Ptx3, A2m, Lep, Nobox, Tox2, Cebpb, Edn2, Bmp15, Fshr, Immp2l, Esr2, Myh9, Amh, Amhr2, Mmp19, Pgr, Acsbg1, Vegfa, Idh1, Inha, Gdf9, Inhbb, Lhx9, Kit, Ereg, Nefh, Inhba, Tp63, Cbr1, Adamts1, Fanca, Serpine1, Vgf, Brca2
150	GO:0046683	BP	response to organophosphorus	6.355067050687338e-5	36	Kcnq1, Fosl1, Pde4d, Hcn1, Hsd3b1, Trpc3, Cftr, Duox1, Ass1, Gata1, Sdc1, Akap6, Gpd1, Wnt10b, Mmp19, Aqp9, Fdx1, Cyp11a1, Hspd1, Cps1, Igfbp5, Sphk1, P2rx5, Nme1, Aldh3a1, Inhbb, Ptgs2, Areg, Ptk2b, Sftpc, Akr1c1, App, Star, Plat, Serpine1, Vgf
151	GO:0072330	BP	monocarboxylic acid biosynthetic process	8.763201374861983e-5	36	Apoc1, LOC681458, Scd, Acsm5, Fads2, Gstm7, Elovl6, Pdk4, Alox5, Mgll, Trib3, Ptgds, Dhrs9, Acot7, Edn2, Mid1ip1, Avpr1a, Gamt, Apoa1, Acsbg1, Acsl3, Sphk1, Ltc4s, Brca1, Alox15, Kmo, Ptgs2, Oxsm, Akr1c3, Elovl2, Star, Lpl, Lipg, Fa2h, Pla2g1b, Acacb
152	GO:0008584	BP	male gonad development	1.6034027617554657e-4	36	Kcnq1, Utf1, Gfra1, Hsd3b2, Sfrp2, Hsd3b1, Cftr, Rad21l1, Nr0b1, Gata1, Msh2, Fshr, Sdc1, Esr2, Six4, Amh, Hmga2, Amhr2, Dhh, Fstl3, Tlr9, Cyp11a1, Inha, Sox8, Tex19.1, Inhbb, Lhx9, Tlr5, Kit, Fgf9, Akr1c3, Inhba, Insl3, Star, Fanca, Adgrg1
153	GO:0046546	BP	development of primary male sexual characteristics	1.7774356691582473e-4	36	Kcnq1, Utf1, Gfra1, Hsd3b2, Sfrp2, Hsd3b1, Cftr, Rad21l1, Nr0b1, Gata1, Msh2, Fshr, Sdc1, Esr2, Six4, Amh, Hmga2, Amhr2, Dhh, Fstl3, Tlr9, Cyp11a1, Inha, Sox8, Tex19.1, Inhbb, Lhx9, Tlr5, Kit, Fgf9, Akr1c3, Inhba, Insl3, Star, Fanca, Adgrg1
154	GO:0048705	BP	skeletal system morphogenesis	0.009321002536349843	36	Scube2, Tgfb1, Sox6, Sfrp2, Bmpr1b, Sox5, Hoxa4, Prrx2, Sp5, Eya1, Zmpste24, Ripply1, Mycn, Six4, Scx, Vdr, Wnt10b, Acp5, Ltf, Csrnp1, Vegfa, Runx2, Ihh, Wnt9a, Wnt9b, Hoxb9, Sh3pxd2b, Fgf18, Sfrp4, Msx2, Comp, Hhip, Cbs, Col13a1, Rflna, Tmem119
155	GO:0010001	BP	glial cell differentiation	0.026341331329335683	36	Apoe, Tgfb1, Bnip3, Sox6, Clcf1, Trpc4, S100a8, S100a9, Rheb, Klf15, Sox5, Bmp2, Pou3f1, Mxra8, Dab1, Id2, Mycn, Sox10, Hmga2, Bcl2l10, Hmbs, Cyp11a1, Gpc1, Serpine2, Epha4, Nfe2l1, Sox8, Gpr37l1, Crb1, Lif, Gap43, App, Fa2h, Il34, Mt3, Egr2
156	GO:0051924	BP	regulation of calcium ion transport	0.037016297272382606	36	Tgfb1, Trdn, Plpp4, Cd19, Pde4d, Homer1, Trpc4, Gstm7, Trpc3, Sri, Dysf, Eppin, Fkbp1a, Aplnr, G6pd, Wnk3, Akap6, Vdr, Tspo, Grin3b, Ubash3b, Tlr9, Thy1, Crhr1, Trpv2, P2rx5, Vmp1, Stc2, Gpr39, Ptgs2, Ramp3, Ptk2b, Ryr2, Camk2a, Serpine1, Pla2g1b
157	GO:0050769	BP	positive regulation of neurogenesis	0.038360441766728696	36	Apoe, Tgfb1, Clcf1, Neurl1, Sema5a, Plxna4, Rheb, Bmp2, Plxnb3, Bex1, Id2, Sox10, Tspo, Plxnc1, Khdc3, Snap91, Dixdc1, Rab11a, Sema7a, Vegfa, Serpine2, Epha4, Serpinf1, Tnfrsf12a, Trpv2, Sox8, Kit, Lif, Bcl11a, Map3k13, Kalrn, Star, Il34, Egr2, Cux2, Flt1
158	GO:0031668	BP	cellular response to extracellular stimulus	0.04997674633551993	36	Fosl1, Folr1, Foxo1, Elapor1, Sfrp2, Pdk4, Asns, Lep, Grin2b, Prkag2, Tnc, Cdkn2b, Mfsd2a, Ppara, Gsdmd, Vdr, Avpr1a, Slc38a3, Ucn2, Mmp3, Myh13, Sphk1, Wnt9b, Ltc4s, Myocd, Asgr1, Inhbb, Atf3, Upp1, Dnajc15, Akr1c3, Adamts1, Lpl, Cbs, Cdkn1a, Bhlha15
159	GO:0008585	BP	female gonad development	3.559236433699937e-6	35	Bmpr1b, Hsd3b1, Ptx3, A2m, Lep, Nobox, Tox2, Cebpb, Edn2, Bmp15, Fshr, Immp2l, Esr2, Myh9, Amh, Amhr2, Mmp19, Pgr, Acsbg1, Vegfa, Idh1, Inha, Gdf9, Inhbb, Lhx9, Kit, Ereg, Nefh, Inhba, Cbr1, Adamts1, Fanca, Serpine1, Vgf, Brca2
160	GO:0046545	BP	development of primary female sexual characteristics	7.95508203573722e-6	35	Bmpr1b, Hsd3b1, Ptx3, A2m, Lep, Nobox, Tox2, Cebpb, Edn2, Bmp15, Fshr, Immp2l, Esr2, Myh9, Amh, Amhr2, Mmp19, Pgr, Acsbg1, Vegfa, Idh1, Inha, Gdf9, Inhbb, Lhx9, Kit, Ereg, Nefh, Inhba, Cbr1, Adamts1, Fanca, Serpine1, Vgf, Brca2
161	GO:0051216	BP	cartilage development	0.0013111963956361865	35	Scube2, Tgfb1, Sox6, Sfrp2, Bmpr1b, Lep, Sox5, Cd44, Frzb, Bmp2, Prrx2, Gdf5, Runx3, Zmpste24, Timp1, Mycn, Chadl, Scx, Hmga2, Wnt10b, Ccn3, Runx2, Ihh, Wnt9a, Fgf18, Fgf9, Slc39a14, Loxl2, Mkx, Pitx1, Msx2, Comp, Maf, Cbs, Rflna
162	GO:0019318	BP	hexose metabolic process	0.008604443102822172	35	Kcnq1, Gdpgp1, Foxo1, Pdk4, Hk2, Lep, Tigar, Sord, Obp2a, Chst1, H6pd, Fuca1, C1qtnf12, Zmpste24, G6pd, Pgk1, Pomc, Ppara, Avpr1a, Gpd1, Rora, Erfe, Nfe2l1, Atf3, Ppargc1a, Pgam2, Igfbp3, Slc39a14, Pfkfb3, Ppp1r3g, Gpt2, Hk1, Hkdc1, Tff3, Acacb
163	GO:0090092	BP	regulation of transmembrane receptor protein serine/threonine kinase signaling pathway	0.012008219392087422	35	Dact2, Tgfb1, Cdkn1c, Folr1, Sfrp2, Fermt1, Bmp2, Crb2, Fkbp1a, Gdf5, Cdkn2b, Sdcbp, Chrdl1, Bmp15, Crim1, Sostdc1, Ppara, Tmprss6, Ccn3, Fstl3, Inha, Myocd, Gdf9, Inhbb, Grem2, Fgf9, Itga8, Sfrp4, Msx2, Inhba, Ucma, Gdf10, Lox, Onecut2, Hspa1a
164	GO:1903522	BP	regulation of blood circulation	0.026669560232059818	35	Kcnq1, Chrna7, Dusp5, Rnls, Trdn, Pde4d, F2rl1, Tacr1, Alox5, Lep, Sri, Mgll, Adra2b, Edn3, Trpa1, Edn2, Zmpste24, Agtr2, Ace2, Fgf13, Chga, Akap6, Sp4, Avpr1a, Tmem65, Scn3b, Ptgs2, Gch1, Myh6, Myh7, Ryr2, App, Kcnn2, Hbegf, Ctnna3
165	GO:0048588	BP	developmental cell growth	0.037804601465290154	35	Apoe, Hamp, Sema5a, Pdlim5, Dclk1, Reg1a, Plxna4, Sema3d, Mgll, Flrt3, Slc23a2, Aurka, Edn3, Sh3gl2, Edn2, G6pd, Agtr2, Fgf13, Akap6, Ppara, Rab11a, Sema7a, Vegfa, Rims1, Tnfrsf12a, Trpv2, Myocd, Gdf9, Bcl11a, Spp1, Map3k13, App, Mt3, Wasf1, Rasal1
166	GO:0006694	BP	steroid biosynthetic process	2.5380178112339664e-5	34	Apoe, Dhcr7, Cyb5r2, Hsd3b2, Hsd3b5, Hsd3b3, Hsd3b1, Cftr, Lep, Lpcat3, Bmp2, H6pd, Dhcr24, Timp1, Nr0b1, G6pd, Tspo, Dhh, Sqle, Apoa1, Fdx1, Cyp11a1, Hsd17b1, Hsd11b1, Hsd17b7, Ppargc1a, Idi1, Akr1c3, Star, Msmo1, Fgf1, Mvd, Hsd17b2, Scarb1
167	GO:0031214	BP	biomineral tissue development	6.005340952578648e-5	34	Wnt11, Tcirg1, Tgfb1, S1pr1, Foxo1, Bmpr1b, Sgms2, Cftr, Alox5, Lep, Snx10, Bmp2, Cebpb, Zmpste24, Gata1, Ppara, Wnt10b, Mtss1, Wnt6, Asgr2, Notum, Fam20a, Alox15, Ptgs2, Spp1, Ptk2b, Msx2, Omd, Comp, Lox, Tspear, Rflna, Tmem119, Kl
168	GO:0046395	BP	carboxylic acid catabolic process	0.0036232769730983744	34	Asrgl1, Lipe, Aig1, Qprt, Lep, Bcat1, Aldh1l1, Lpin3, Obp2a, Crat, Padi3, Acot7, Iffo2, Cpt2, Mfsd2a, Decr1, Otc, Dlst, Acot4, Acot2, Amdhd1, Plin5, Pipox, Afmid, Kmo, Hgd, Mat1a, Aadat, Acaa2, Tysnd1, Cbs, Hpd, Sdsl, Acacb
169	GO:0061138	BP	morphogenesis of a branching epithelium	0.0036232769730983744	34	Tgfb1, Sema5a, Sfrp2, Cd44, Bmp2, Eya1, Clic4, Epha2, Tnc, Agtr2, Mycn, Six4, Sox10, Hmga2, Vdr, Ntn4, Pgr, Ctsh, Vegfa, Ihh, Wnt6, Wnt9b, Sox8, Etv4, Areg, Msx2, Tp63, Col4a1, Fgf1, Sall1, Cdh1, Hhip, Notch4, Flt1
170	GO:0016054	BP	organic acid catabolic process	0.003993517903039635	34	Asrgl1, Lipe, Aig1, Qprt, Lep, Bcat1, Aldh1l1, Lpin3, Obp2a, Crat, Padi3, Acot7, Iffo2, Cpt2, Mfsd2a, Decr1, Otc, Dlst, Acot4, Acot2, Amdhd1, Plin5, Pipox, Afmid, Kmo, Hgd, Mat1a, Aadat, Acaa2, Tysnd1, Cbs, Hpd, Sdsl, Acacb
171	GO:0030595	BP	leukocyte chemotaxis	0.0049367480403778325	34	Pde4d, S1pr1, F2rl1, Vav3, S100a8, S100a9, Alox5, Klrk1, Dysf, Edn3, Edn2, Csf3r, Chga, Lgmn, Ccn3, Vegfa, Cxcr2, Scg2, Ccl20, Tmem102, Slamf1, Tnfsf18, Kit, Pf4, Spp1, Ptk2b, Gpr183, Cxcl14, Retnlg, App, Il34, Serpine1, Pla2g1b, Flt1
172	GO:0003018	BP	vascular process in circulatory system	0.012893072394817977	34	Gpr4, Apoe, P2ry2, Tgfb1, Dusp5, F2rl1, Cftr, Tacr1, Alox5, Lep, Mgll, Adra2b, Edn3, Sh3gl2, Mfsd2a, Edn2, Slc16a2, G6pd, Agtr2, Esr2, Chga, Avpr1a, Gpx1, Vegfa, Cxcr2, Cps1, Ptgs2, Sod3, Gch1, Kcnma1, Comp, Mylk3, Cbs, Flt1
173	GO:0007411	BP	axon guidance	0.012893072394817977	34	Sema5a, Bmpr1b, Lrtm2, Plxna4, Sema3d, Flrt3, Lhx3, Edn3, Runx3, Epha2, Tmeff1, Plxnb3, Bcl11b, Plxnc1, Robo3, Ephb1, Sema7a, Vegfa, Epha4, Efnb3, Etv4, Ngfr, Enah, Lhx9, Lamc2, Epha5, Tubb2b, Unc5a, Kalrn, Gap43, App, Drgx, Unc5d, Egr2
174	GO:0097485	BP	neuron projection guidance	0.013337481868848254	34	Sema5a, Bmpr1b, Lrtm2, Plxna4, Sema3d, Flrt3, Lhx3, Edn3, Runx3, Epha2, Tmeff1, Plxnb3, Bcl11b, Plxnc1, Robo3, Ephb1, Sema7a, Vegfa, Epha4, Efnb3, Etv4, Ngfr, Enah, Lhx9, Lamc2, Epha5, Tubb2b, Unc5a, Kalrn, Gap43, App, Drgx, Unc5d, Egr2
175	GO:0034764	BP	positive regulation of transmembrane transport	0.023105555157842524	34	Kcnq1, Trdn, Gal, Cd19, Glrx, Gstm7, Hcn1, Car2, Cftr, Alox5, Sri, Dpp6, Klf15, Edn3, Aplnr, C1qtnf12, Oprk1, G6pd, Ace2, Wnk3, Akap6, Thy1, Erfe, Acsl6, Cacng4, P2rx5, Slc9a3r1, Vmp1, Gpr39, Ramp3, Actn2, Wnk2, Ryr2, Acsl1
176	GO:0060348	BP	bone development	0.03178041698754362	34	Scube2, Tgfb1, Sfrp2, Bmpr1b, Lep, Snx10, Bmp2, Sp5, Npr2, Zmpste24, Ripply1, Scx, Mapk11, Cadm1, Acp5, Anxa2, Ltf, Runx2, Ihh, Sh3pxd2b, Fgf18, Notum, Hsd17b1, Kit, Sfrp4, Msx2, Comp, Lox, Hsd17b2, Mpig6b, Cbs, Col13a1, Rflna, Tmem119
177	GO:0070663	BP	regulation of leukocyte proliferation	0.03178041698754362	34	Tgfb1, Enpp3, Scgb1a1, Gal, Clcf1, Il27, Il7, Vtcn1, Vav3, Tacr1, Lep, Il23r, Il12rb2, Cd44, Sdc4, Cebpb, Foxp3, Cd3e, Tlr9, Ihh, Zap70, Ikzf3, Cd300a, Atad5, Slamf1, Tnfsf18, Gpr183, Il2ra, Bcl6, Sftpd, Il34, Btnl2, Cdkn1a, Clec4g
178	GO:0015850	BP	organic hydroxy compound transport	0.038360441766728696	34	Apoc1, Apoe, Kcnq1, Chrna7, Pnlip, Syt7, Gal, Cftr, Lep, Abcb1b, Lpcat3, Syt13, Oprk1, Agtr2, Pomc, Chga, Tspo, Apoa1, Anxa2, Aqp9, Plcd1, Rab11a, Vapa, Crhr1, Cd300a, Spp1, Igfbp3, Abcc4, Slc51a, Rab3a, Star, Slc10a2, Lipg, Scarb1
179	GO:0014706	BP	striated muscle tissue development	0.03956556818217695	34	Tgfb1, Alpk3, Hamp, Sox6, Fgf3, S1pr1, Pdlim5, Adamts9, Neb, Ttn, Bmp2, Fkbp1a, Gata5, Eya1, Zmpste24, G6pd, Agtr2, Id2, Akap6, Ppara, Mapk11, Vegfa, Tcap, Myocd, Sgcd, Kcnk2, Myh6, Myh7, Fgf9, Sgcg, Actn2, Ryr2, Lox, Mylk3
180	GO:2000241	BP	regulation of reproductive process	0.005773627052620245	33	Ptgdr2, Bnc1, Cib1, P2ry2, Zp1, Nlrp5, LOC100910107, Anxa5, Cftr, Tacr1, Ptgds, Eppin, Aurka, Npr2, Timp1, Plb1, Myh9, Tac3, Amh, Mmp12, Ooep, Kif9, Vegfa, Serpinf1, Gdf9, Inhbb, Lif, Plau, Msx2, Inhba, Mastl, Insl3, Plat
181	GO:0071902	BP	positive regulation of protein serine/threonine kinase activity	0.0061448978012235474	33	Cib1, Tgfb1, Psrc1, Bmpr1b, Rasgrp1, Bmp2, Il1rn, Edn3, Tcl1a, Akap6, Hmga2, Tlr9, Ltf, Vegfa, Epha4, Fgf18, Cdc6, Gdf9, Fam20a, Gpr39, Tnfrsf11a, Kit, Rgcc, Ptk2b, Nek10, Mastl, Map3k13, App, Acsl1, Fgf1, Il34, Pla2g1b, Flt1
182	GO:0001889	BP	liver development	0.030764842587968882	33	Dbp, Tgfb1, H19, Hamp, Igf2r, Cftr, Reg1a, Asns, Frzb, Aurka, Cebpb, Ass1, Ptpn3, Cdkn2b, Zmpste24, Alas2, Otc, E2f7, Cadm1, Hmbs, Ihh, Cps1, Ccdc40, Fgf18, Hlx, Plau, Fgf1, Onecut2, Hp, Lims1, Ggt1, Cit, Flt1
183	GO:0061008	BP	hepaticobiliary system development	0.03451240184527416	33	Dbp, Tgfb1, H19, Hamp, Igf2r, Cftr, Reg1a, Asns, Frzb, Aurka, Cebpb, Ass1, Ptpn3, Cdkn2b, Zmpste24, Alas2, Otc, E2f7, Cadm1, Hmbs, Ihh, Cps1, Ccdc40, Fgf18, Hlx, Plau, Fgf1, Onecut2, Hp, Lims1, Ggt1, Cit, Flt1
184	GO:0090257	BP	regulation of muscle system process	0.038399747153749365	33	Kcnq1, Hamp, Pde4d, Foxo1, Trpc3, Tacr1, Sri, Adra2b, Ttn, Gata5, Trim63, Edn2, G6pd, Ace2, Fgf13, Chga, Akap6, Ppara, Pgr, Chrnb4, Chrna3, Igfbp5, Sphk1, Sgca, Myocd, Ptgs2, Ppargc1a, Kit, Myh7, Kcnma1, Ryr2, Ctnna3, Flt1
185	GO:0033002	BP	muscle cell proliferation	0.04181455171000051	33	Apoe, Tgfb1, Ptgir, Pde4d, S1pr1, Tacr1, Bmp2, Ace2, Id2, Esr2, Vipr2, Tafa5, Mapk11, Ccn3, Trib1, Ephb1, Vegfa, Igfbp5, Myocd, Kcnk2, Ptgs2, Rgs5, Ppargc1a, Ereg, Igfbp3, Fgf9, Abcc4, Kalrn, Adamts1, Megf10, Hbegf, Cdkn1a, Flt1
186	GO:2000377	BP	regulation of reactive oxygen species metabolic process	1.1047075724031294e-4	32	Tgfb1, Bnip3, Foxo1, F2rl1, Dhfr, Alox5, Hk2, Lep, Gadd45a, Tigar, G6pd, Mycn, Esr2, Ppara, Tspo, Adgrb1, Acp5, Mmp3, Plin5, Hspd1, Brca1, Ngfr, Gch1, Ptk2b, Plau, Akr1c3, Akr1c1, Cbr1, App, Hp, Mt3, Cdkn1a
187	GO:0043405	BP	regulation of MAP kinase activity	0.001992146251919943	32	Ptpn5, Apoe, Tgfb1, Smpd1, Sfrp2, Dusp16, Rasgrp1, Trib3, Bmp2, Il1rn, Edn3, Trib2, Trib1, Tlr9, Vegfa, Epha4, Cd300a, Fgf18, Gdf9, Gpr39, Tnfrsf11a, Kit, Ptk2b, Nek10, Map3k13, App, Fgf1, Spry4, Il34, Cbs, Pla2g1b, Flt1
188	GO:0048771	BP	tissue remodeling	0.006679478450317208	32	Tcirg1, Tgfb1, Hamp, Syt7, Il7, S1pr1, Car2, Pdk4, Lep, Abcb1b, Snx10, Gdf5, Epha2, Timp1, Fshr, Vdr, Cthrc1, Tnfrsf11b, Acp5, Ubash3b, Vegfa, Ihh, Gpr55, Igfbp5, Crb1, Tnfrsf11a, Lif, Spp1, Ptk2b, Sfrp4, Cbs, Tmem119
189	GO:0044242	BP	cellular lipid catabolic process	0.01038054065149331	32	Apoc1, Pnliprp2, Lipe, Aig1, Smpd1, Plpp1, Lep, Mgll, Lpin3, Obp2a, Crat, Acot7, Cpt2, Mfsd2a, Decr1, Plb1, Acot2, Gpihbp1, Apoa1, Abhd5, Plin5, Cps1, Idh1, Akr1c3, Lpl, Lipg, Acaa2, Mt3, Tysnd1, Pnpla1, Scarb1, Acacb
190	GO:0001649	BP	osteoblast differentiation	0.012026091256516842	32	Wnt11, Scube2, Tcirg1, Sfrp2, Bmpr1b, Bmp2, Cebpb, Creb3l1, Epha2, Crim1, Id2, Mapk11, Cthrc1, Dhh, Wnt10b, Ltf, Vegfa, Runx2, Ihh, Igfbp5, Sox8, Sh3pxd2b, Areg, Spp1, Igfbp3, Fgf9, Msx2, Ucma, Tp63, Gdf10, Lox, Tmem119
191	GO:0007188	BP	adenylate cyclase-modulating G protein-coupled receptor signaling pathway	0.016311199814262045	32	Ptgdr2, Gpr4, Gna14, Gpha2, Ptgir, Rln1, Gnat2, Pde4d, S1pr1, Ptgfr, Gpr37, Grm8, Gpr176, Adra2b, Oprk1, Fshr, Chga, Vipr2, Adgrb1, Ucn2, Gpr62, Pth2r, Crhr1, Slc9a3r1, Gpr37l1, Pf4, Ramp3, Mrap, App, Insl3, Adgrg1, Gnaz
192	GO:0002573	BP	myeloid leukocyte differentiation	0.0191806918024608	32	Tcirg1, Tgfb1, F2rl1, Car2, Hsd3b1, Snx10, Cebpb, Epha2, Gata1, Fshr, Id2, Myh9, Pde1b, Tnfrsf11b, Trib1, Fstl3, Acp5, Ubash3b, Anxa2, Vegfa, Farp2, Gpr55, Nme1, Batf3, Tnfrsf11a, Kit, Lif, Pf4, Gpr183, App, Il34, Pilrb
193	GO:0050670	BP	regulation of lymphocyte proliferation	0.029434711567922843	32	Tgfb1, Scgb1a1, Gal, Clcf1, Il27, Il7, Vtcn1, Vav3, Tacr1, Lep, Il23r, Il12rb2, Cd44, Sdc4, Cebpb, Foxp3, Cd3e, Tlr9, Ihh, Zap70, Ikzf3, Cd300a, Atad5, Slamf1, Tnfsf18, Gpr183, Il2ra, Bcl6, Sftpd, Btnl2, Cdkn1a, Clec4g
194	GO:0003015	BP	heart process	0.032202528913237743	32	Kcnq1, Chrna7, Rnls, Trdn, Pde4d, Sri, Kcnj8, Ttn, Edn3, Edn2, Zmpste24, Agtr2, Ace2, Fgf13, Chga, Akap6, Sp4, Avpr1a, Tmem65, Scn3b, Gpx1, Tcap, Sgcd, Ramp3, Gch1, Myh6, Myh7, Sgcg, Ryr2, Kcnn2, Hbegf, Ctnna3
195	GO:0032944	BP	regulation of mononuclear cell proliferation	0.03466731250201175	32	Tgfb1, Scgb1a1, Gal, Clcf1, Il27, Il7, Vtcn1, Vav3, Tacr1, Lep, Il23r, Il12rb2, Cd44, Sdc4, Cebpb, Foxp3, Cd3e, Tlr9, Ihh, Zap70, Ikzf3, Cd300a, Atad5, Slamf1, Tnfsf18, Gpr183, Il2ra, Bcl6, Sftpd, Btnl2, Cdkn1a, Clec4g
196	GO:0032355	BP	response to estradiol	0.0409775769192377	32	Tgfb1, Glrx, Ptgfr, Hsd3b1, Tacr1, Lep, Aurka, Ass1, Esr2, Serpina1, Vdr, Dhh, Mmp3, Hmbs, Gpx1, Vegfa, Ihh, Brca1, Hsd11b1, Ptgs2, Hsd17b7, Ppargc1a, Areg, Nefh, Ramp3, Igfbp3, Sfrp4, Msx2, Cbr1, Ggt1, Brca2, Flt1
197	GO:0048738	BP	cardiac muscle tissue development	0.04710147475701321	32	Tgfb1, Alpk3, Hamp, Sox6, Fgf3, S1pr1, Pdlim5, Adamts9, Neb, Ttn, Bmp2, Fkbp1a, Gata5, Zmpste24, G6pd, Agtr2, Id2, Akap6, Ppara, Mapk11, Vegfa, Tcap, Myocd, Sgcd, Kcnk2, Myh6, Myh7, Fgf9, Sgcg, Actn2, Ryr2, Mylk3
198	GO:0090087	BP	regulation of peptide transport	0.04710147475701321	32	Arntl, Sct, Kcnq1, Tcirg1, Syt7, Gal, Glrx, Anxa5, S100a8, S100a9, Car2, Cftr, Alox5, Lep, Sri, Snap25, Trpa1, C1qtnf12, Chga, Myh9, Hmga2, Avpr1a, Ccn3, Baiap3, Gpr39, Inhbb, Kiss1, Mpc2, Epha5, Lif, Kalrn, Ildr1
199	GO:0006633	BP	fatty acid biosynthetic process	5.3318483984153644e-5	31	Apoc1, LOC681458, Scd, Acsm5, Fads2, Gstm7, Elovl6, Pdk4, Alox5, Mgll, Trib3, Ptgds, Acot7, Edn2, Mid1ip1, Avpr1a, Apoa1, Acsbg1, Acsl3, Sphk1, Ltc4s, Brca1, Alox15, Ptgs2, Oxsm, Elovl2, Lpl, Lipg, Fa2h, Pla2g1b, Acacb
200	GO:1905952	BP	regulation of lipid localization	2.1964867101767195e-4	31	Apoc4, Apoc1, Apoe, P2ry2, Gal, Lrat, Lep, Abcb1b, Lpcat3, Plin2, Agtr2, Pomc, Ppara, Tspo, Apoa1, Anxa2, Abhd5, Erfe, Plin5, Acsl6, Crhr1, Gdf9, Tnfrsf11a, Atp8a1, Spp1, Igfbp3, Acsl1, Lpl, Lipg, Scarb1, Acacb
201	GO:0007292	BP	female gamete generation	0.001079424801213242	31	Bnc1, Fosl1, Tdrd1, Bmpr1b, Hsd3b1, Ptx3, Lep, Aurka, Npr2, Edn2, Ezhip, Immp2l, Amh, Mmp19, Pgr, Ihh, Top2a, Gdf9, Inhbb, Ptgs2, Ereg, Ptk2b, Plau, Inhba, Mastl, Cbr1, Adamts1, Insl3, Plat, Nanos3, Brca2
202	GO:0046890	BP	regulation of lipid biosynthetic process	0.0030954694229322925	31	Apoc1, Apoe, Rab38, Dhcr7, Hsd3b5, Pdk4, Lep, Lpcat3, Trib3, Bmp2, Obp2a, H6pd, Mfsd2a, Nr0b1, Mid1ip1, Ppara, Tspo, Avpr1a, Dhh, Apoa1, Plin5, Idh1, Acsl3, Sphk1, Brca1, Ptgs2, Ppargc1a, Akr1c3, Star, Fgf1, Scarb1
203	GO:0006109	BP	regulation of carbohydrate metabolic process	0.005335160769598047	31	Tgfb1, Pgam1, Foxo1, Pdk4, Lep, Tigar, Prkag2, Slc2a6, Obp2a, C1qtnf12, Zmpste24, Pomc, Ppara, Myh9, Avpr1a, Gpd1, Rora, Plcd1, Erfe, Nfe2l1, Hsd11b1, Ppargc1a, Slc4a4, Igfbp3, Ptk2b, Pfkfb3, Ppp1r3g, App, Gpt2, Tff3, Acacb
204	GO:0022408	BP	negative regulation of cell-cell adhesion	0.005335160769598047	31	Tgfb1, Scgb1a1, Vtcn1, Cd44, Bmp2, Sdc4, Cebpb, Il1rn, Ass1, Runx3, Foxp3, Ppara, Apoa1, Ubash3b, Vegfa, Ihh, Serpine2, Cd300a, Hlx, Ildr2, Tnfsf18, Nf2, Rgcc, Il2ra, Bcl6, Sftpd, Cdh1, Cdsn, Notch4, Hspb1, Clec4g
205	GO:0055001	BP	muscle cell development	0.014931523586476465	31	Alpk3, Actn4, Hamp, Homer1, Pdlim5, Dysf, Neb, Ttn, Klhl41, Zmpste24, G6pd, Agtr2, Sdc1, Six4, Akap6, Ppara, Wnt10b, Gpx1, Vegfa, Tcap, Myocd, Chrnb1, Actg1, Sgcd, Myh6, Actn2, Rcan1, Comp, Lox, Megf10, Mylk3
206	GO:0007160	BP	cell-matrix adhesion	0.023965673277790717	31	Cib1, Itgad, Vwa2, Itga10, Adamts9, Fermt1, Sdc4, Ston1, Myh9, Cd3e, Col5a3, Plet1, Mmp12, Thy1, Vegfa, Pecam1, Itgae, Skap1, Actg1, Ptk2b, Plau, Actn2, Itga8, Epdr1, Phldb2, Cd96, Bcl6, Onecut2, Lims1, Col13a1, Serpine1
207	GO:0050920	BP	regulation of chemotaxis	0.032231777264014404	31	Smoc2, Tgfb1, S1pr1, Sema5a, F2rl1, Plxna4, Sema3d, Klrk1, Dysf, Edn3, Edn2, Lgmn, Ccn3, Sema7a, Vegfa, Cxcr2, Scg2, Fgf18, Tmem102, Slamf1, Tnfsf18, Ptk2b, Gpr183, Tubb2b, Cxcl14, App, Angpt2, Fgf1, Il34, Serpine1, Hspb1
208	GO:0060047	BP	heart contraction	0.032231777264014404	31	Kcnq1, Chrna7, Rnls, Trdn, Pde4d, Sri, Kcnj8, Ttn, Edn3, Edn2, Zmpste24, Agtr2, Ace2, Fgf13, Chga, Akap6, Sp4, Avpr1a, Tmem65, Scn3b, Gpx1, Tcap, Sgcd, Gch1, Myh6, Myh7, Sgcg, Ryr2, Kcnn2, Hbegf, Ctnna3
209	GO:0010632	BP	regulation of epithelial cell migration	0.04112196790107385	31	Apoe, Cib1, Smoc2, Tgfb1, Plk2, Sema5a, Tacr1, Gadd45a, Adamts9, Epha2, Epb41l4b, Lgmn, Ptprr, Adgrb1, Ctsh, Dnaja4, Rab11a, Vegfa, Serpinf1, Fgf18, Ptgs2, Rgcc, Ptk2b, Insl3, Angpt2, Fgf1, Hbegf, Bcar1, Marveld3, Serpine1, Hspb1
210	GO:0006813	BP	potassium ion transport	0.04366825320333039	31	Kcnc3, Kcnq1, Kcnk4, Atp4a, Gal, Kcnab1, Hcn1, Dpp6, Kcnj8, Kcna4, Snap25, Edn3, Kcnb2, Slc24a2, Kcnq4, Oprk1, Wnk3, Slc24a4, Akap6, Kcnj12, Kcnk2, Kcnrg, Ptk2b, Atp12a, Kcnma1, Actn2, Wnk2, Atp4b, Kcnn2, Neto1, Kcng4
211	GO:0051591	BP	response to cAMP	1.0186281503016507e-4	30	Kcnq1, Fosl1, Pde4d, Hcn1, Hsd3b1, Cftr, Duox1, Ass1, Gata1, Sdc1, Akap6, Gpd1, Wnt10b, Mmp19, Aqp9, Fdx1, Cyp11a1, Cps1, Igfbp5, Nme1, Aldh3a1, Inhbb, Areg, Ptk2b, Sftpc, App, Star, Plat, Serpine1, Vgf
212	GO:0042476	BP	odontogenesis	2.1964867101767195e-4	30	Tcirg1, Perp, Tgfb1, Relt, Foxo1, Car2, Cftr, Snx10, Bmp2, Tnc, Csf3r, Sdc1, Sostdc1, Slc24a4, Bcl11b, Ppara, Tnfrsf11b, Runx2, Wnt10a, Wnt6, Fam20a, Ngfr, Adamts4, Nf2, Msx2, Inhba, Tp63, Adamts1, Tspear, Serpine1
213	GO:0033273	BP	response to vitamin	0.0024846149688854103	30	Tgfb1, Hamp, Folr1, Crym, Lrat, Hsd3b1, Lep, Abcb1b, Cd44, Tnc, Orm1, Otc, Vdr, Tspo, Acp5, Hmbs, Gpx1, Cyp11a1, Vegfa, Runx2, Ltc4s, Stc2, Ptgs2, Spp1, Sftpc, Adamts1, Hp, Cbs, Gstt1, Kl
214	GO:0043409	BP	negative regulation of MAPK cascade	0.002667148721850254	30	Ptpn5, Apoe, Chrna7, Dusp5, Nlrp6, Smpd1, Foxo1, F2rl1, Gbp1, Sfrp2, Lmo3, Dusp16, Bmp2, Ace2, Rps6ka6, Ptprr, Dusp6, Tlr9, Epha4, Cd300a, Slc9a3r1, Atf3, Lif, Nf2, Dusp13, Wnk2, Sfrp4, Dusp4, Spry4, Marveld3
215	GO:0048754	BP	branching morphogenesis of an epithelial tube	0.0033067348601798553	30	Tgfb1, Sema5a, Sfrp2, Cd44, Bmp2, Eya1, Clic4, Epha2, Tnc, Agtr2, Mycn, Six4, Hmga2, Vdr, Pgr, Ctsh, Vegfa, Ihh, Wnt6, Wnt9b, Sox8, Etv4, Areg, Msx2, Col4a1, Fgf1, Sall1, Hhip, Notch4, Flt1
216	GO:0019722	BP	calcium-mediated signaling	0.01465302695687124	30	Ptgdr2, Cib1, Gbp1, Ptgfr, Grin2b, Edn2, Zmpste24, Gpr143, Pomc, Slc24a4, Akap6, Avpr1a, Cd3e, Ccr9, Cxcr6, Cxcr2, Ccl20, Zap70, Sphk1, Tmem100, Grin2c, Sgcd, Ptk2b, Ryr2, Trat1, Rcan1, App, Necab2, Tox3, Bhlha15
217	GO:0071805	BP	potassium ion transmembrane transport	0.017839074720634705	30	Kcnc3, Kcnq1, Kcnk4, Atp4a, Gal, Kcnab1, Hcn1, Dpp6, Kcnj8, Kcna4, Snap25, Edn3, Kcnb2, Slc24a2, Kcnq4, Oprk1, Wnk3, Slc24a4, Akap6, Kcnj12, Kcnk2, Kcnrg, Atp12a, Kcnma1, Actn2, Wnk2, Atp4b, Kcnn2, Neto1, Kcng4
218	GO:0043542	BP	endothelial cell migration	0.02600408245668443	30	Apoe, Cib1, Smoc2, Tgfb1, Plk2, Sema5a, Gadd45a, Adamts9, Epha2, Edn2, Lgmn, Myh9, Ccn3, Adgrb1, Apoa1, Dnaja4, Gpx1, Vegfa, Pecam1, Serpinf1, Fgf18, Ptgs2, Rgcc, Ptk2b, Loxl2, Angpt2, Fgf1, Bcar1, Scarb1, Hspb1
219	GO:0016125	BP	sterol metabolic process	1.1511738454284843e-4	29	Apoc1, Apoe, Lipe, Dhcr7, Smpd1, Cyb5r2, Cftr, Lep, Lpcat3, Dhcr24, G6pd, Soat2, Sqle, Apoa1, Fdx1, Cyp11a1, Nfe2l1, Fdxr, Pctp, Hsd17b7, Ebpl, Idi1, App, Star, Msmo1, Fgf1, Mvd, Mt3, Scarb1
220	GO:0035725	BP	sodium ion transmembrane transport	0.001298466317151063	29	Kcnq1, Slc6a5, Fxyd5, Fxyd7, Atp4a, Glrx, Hcn1, Cftr, Slc4a5, Slc6a6, Stom, Ptpn3, Slc24a2, Fgf13, Wnk3, Slc24a4, Scn8a, Scn3b, Slc6a20a, Asic4, Slc9a3r1, Slc4a4, Atp12a, Slc28a3, Wnk2, Slc17a3, Hecw1, Atp4b, Neto1
221	GO:0007613	BP	memory	0.001915125187884219	29	Apoe, Rin1, Klk8, Chrna7, Kcnk4, Sorcs3, Pde4d, Plk2, Tacr1, Grin2b, Snap25, Cebpb, Il1rn, Map1a, Slc24a2, Fgf13, Ptchd1, Lgmn, Chst10, Crhr1, Serpinf1, Kcnk2, Ptgs2, Itga8, Kalrn, Rcan1, App, Neto1, Cux2
222	GO:1901605	BP	alpha-amino acid metabolic process	0.008199982405013307	29	Asrgl1, Glyatl1, Psat1, Dhfr, Bhmt, Asns, Bcat1, Ass1, Padi3, Iffo2, Mtap, Ctps1, Otc, Dlst, Amdhd1, Gamt, Cps1, Pipox, Afmid, Nags, Kmo, Hgd, Mat1a, Aadat, Gpt2, Cbs, Ggt1, Hpd, Sdsl
223	GO:0048659	BP	smooth muscle cell proliferation	0.012008219392087422	29	Apoe, Tgfb1, Ptgir, Pde4d, S1pr1, Tacr1, Bmp2, Ace2, Id2, Esr2, Vipr2, Tafa5, Ccn3, Trib1, Vegfa, Igfbp5, Myocd, Ptgs2, Rgs5, Ppargc1a, Ereg, Igfbp3, Fgf9, Abcc4, Kalrn, Adamts1, Hbegf, Cdkn1a, Flt1
224	GO:0016051	BP	carbohydrate biosynthetic process	0.013575577497603582	29	Epm2a, Tgfb1, B3gnt8, Chst8, Foxo1, Lep, Sord, Obp2a, C1qtnf12, G6pd, Pgk1, Ppara, Myh9, Gpd1, Plcd1, Erfe, B3gnt7, Chst10, Atf3, Ppargc1a, Pgam2, Ptk2b, Slc39a14, Ppp1r3g, B3gnt3, Isyna1, Gpt2, Chst12, B3gnt4
225	GO:0006006	BP	glucose metabolic process	0.03392641257486613	29	Kcnq1, Gdpgp1, Foxo1, Pdk4, Hk2, Lep, Tigar, Obp2a, H6pd, C1qtnf12, Zmpste24, G6pd, Pgk1, Pomc, Ppara, Avpr1a, Gpd1, Rora, Erfe, Nfe2l1, Atf3, Ppargc1a, Pgam2, Igfbp3, Slc39a14, Ppp1r3g, Gpt2, Tff3, Acacb
226	GO:0099173	BP	postsynapse organization	0.03392641257486613	29	Apoe, Chrna7, Dlg2, Homer1, Pdlim5, Grin2b, Rheb, Ntng2, LOC100361457, Chrdl1, Cnksr2, Lgmn, Adgrb1, Cadm1, Ephb1, Kif1a, Dlgap1, Epha4, Chrnb1, Actg1, Epha5, Nefh, Farp1, Kalrn, Gap43, App, Cbln1, Rph3a, Cux2
227	GO:0060538	BP	skeletal muscle organ development	0.038360441766728696	29	Arntl, Tgfb1, H19, Nphs1, Neurl1, Homer1, Kcnab1, Dysf, Klhl41, Ass1, Cntfr, Six4, Scx, Wnt10b, Ephb1, Gpx1, Gpc1, P2rx5, Hlf, Sox8, Myocd, Ngfr, Hlx, Atf3, Pitx1, Myh15, Rcan1, Megf10, Egr2
228	GO:0097529	BP	myeloid leukocyte migration	0.04704790879355219	29	Pde4d, Vav3, S100a8, S100a9, Dysf, Edn3, Edn2, Csf3r, Chga, Lgmn, Ccn3, Vegfa, Cxcr2, Scg2, Ccl20, Pecam1, Cd300a, Slamf1, Tnfsf18, Kit, Pf4, Spp1, Ptk2b, Retnlg, App, Il34, Serpine1, Pla2g1b, Flt1
229	GO:1902652	BP	secondary alcohol metabolic process	7.796613301072981e-4	28	Apoc1, Apoe, Lipe, Dhcr7, Smpd1, Cftr, Lep, Lpcat3, Dhcr24, G6pd, Soat2, Sqle, Apoa1, Fdx1, Cyp11a1, Idh1, Nfe2l1, Fdxr, Pctp, Hsd17b7, Idi1, App, Star, Msmo1, Fgf1, Mvd, Mt3, Scarb1
230	GO:0031644	BP	regulation of nervous system process	0.016192196363374125	28	Klk8, Chrna7, Cnih2, Homer1, Pclo, Grin2b, Mgll, Trpa1, Oprk1, Sox10, Avpr1a, Ccn3, Chrnb4, Chrna5, Dlgap1, Rims1, Shisa9, Cacng4, Tmem100, Grin2c, Ngfr, Ptk2b, App, Neto1, Cbln1, Egr2, Cux2, Prkar1b
231	GO:0034767	BP	positive regulation of ion transmembrane transport	0.018252862066950166	28	Kcnq1, Trdn, Gal, Cd19, Glrx, Gstm7, Hcn1, Cftr, Alox5, Sri, Dpp6, Edn3, Aplnr, Oprk1, G6pd, Ace2, Wnk3, Akap6, Thy1, Cacng4, P2rx5, Slc9a3r1, Vmp1, Gpr39, Ramp3, Actn2, Wnk2, Ryr2
232	GO:0010721	BP	negative regulation of cell development	0.035202921221518926	28	Tgfb1, Actn4, Sema5a, Gbp1, Cftr, Sema3d, Frzb, Dab1, Npr2, Cdkn2b, Fgf13, Id2, Mycn, Sox10, Hmga2, Tspo, Thy1, Sema7a, Vegfa, Efnb3, Gpr37l1, Bcl11a, Spp1, Spry4, Bcar1, Mt3, Rflna, Cit
233	GO:0008217	BP	regulation of blood pressure	0.049461594159732496	28	Kcnq1, Klk7, Anpep, Chrna7, Rnls, Pde4d, F2rl1, Tacr1, Lep, Slc4a5, Adra2b, Edn3, Edn2, Atp6ap2, G6pd, Agtr2, Ace2, Fshr, Id2, Pomc, Ppara, Tac3, Avpr1a, Gpr37l1, Ptgs2, Gch1, Myh6, Kl
234	GO:0008203	BP	cholesterol metabolic process	2.992820446600603e-4	27	Apoc1, Apoe, Lipe, Dhcr7, Smpd1, Cftr, Lep, Lpcat3, Dhcr24, G6pd, Soat2, Sqle, Apoa1, Fdx1, Cyp11a1, Nfe2l1, Fdxr, Pctp, Hsd17b7, Idi1, App, Star, Msmo1, Fgf1, Mvd, Mt3, Scarb1
235	GO:0072073	BP	kidney epithelium development	0.0028369308589439057	27	Irx2, Wnt11, Tgfb1, Nphs1, Vcan, Klf15, Cd44, Bmp2, Sdc4, Eya1, Agtr2, Sdc1, Six4, Mtss1, Vegfa, Cxcr2, Wnt6, Epha4, Pecam1, Wnt9b, Sox8, Kif26b, Nphs2, Lif, Crlf1, Fgf1, Sall1
236	GO:0120254	BP	olefinic compound metabolic process	0.006317373188232286	27	Lipe, Cyp2b1, Pnlip, Abca4, Gstm7, Lrat, Hsd3b5, Hsd3b1, Alox5, Mgll, Bmp2, Dhrs9, H6pd, Plb1, Rbp2, Gpx1, Cyp11a1, Sphk1, Alox15, Hsd17b1, Ptgs2, Ppargc1a, Kcnma1, Akr1c2, Akr1c3, Akr1c1, Star
237	GO:0051592	BP	response to calcium ion	0.013046872250610523	27	Cyp2b1, Syt7, Smpd1, Pcsk1, Homer1, Anxa5, Hcn1, Hsd3b1, Trpc3, Grin2b, Ttn, Syt13, Clic4, Sdc1, Lgmn, Vdr, Plcd1, P2rx5, Actg1, Alox15, Inhbb, Ptk2b, Kcnma1, Akr1c3, Ryr2, App, Rasal1
238	GO:0035150	BP	regulation of tube size	0.016699391977399645	27	Apoe, P2ry2, Dusp5, F2rl1, Cftr, Tacr1, Alox5, Lep, Mgll, Adra2b, Edn3, Edn2, G6pd, Agtr2, Esr2, Chga, Avpr1a, Gpx1, Vegfa, Cps1, Wnt9b, Ptgs2, Sod3, Gch1, Kcnma1, Comp, Cbs
239	GO:0048660	BP	regulation of smooth muscle cell proliferation	0.017839074720634705	27	Apoe, Tgfb1, Ptgir, Pde4d, S1pr1, Tacr1, Bmp2, Ace2, Id2, Esr2, Vipr2, Tafa5, Trib1, Vegfa, Igfbp5, Myocd, Ptgs2, Rgs5, Ppargc1a, Ereg, Igfbp3, Fgf9, Abcc4, Adamts1, Hbegf, Cdkn1a, Flt1
240	GO:0060401	BP	cytosolic calcium ion transport	0.04185735783459577	27	Tgfb1, Trpm1, Trdn, Slc35g1, Cd19, Pde4d, Gstm7, Trpc3, Sri, Grin2b, Fkbp1a, Aplnr, Trpa1, Slc24a2, Atp2b3, Slc24a4, Akap6, Ubash3b, Thy1, Trpv2, P2rx5, Grin2c, Gpr39, Ramp3, Ptk2b, Ryr2, Pla2g1b
241	GO:0007519	BP	skeletal muscle tissue development	0.045624379463155174	27	Arntl, Tgfb1, H19, Nphs1, Neurl1, Homer1, Kcnab1, Dysf, Klhl41, Six4, Scx, Wnt10b, Ephb1, Gpx1, Gpc1, P2rx5, Hlf, Sox8, Myocd, Ngfr, Hlx, Atf3, Pitx1, Myh15, Rcan1, Megf10, Egr2
242	GO:0002062	BP	chondrocyte differentiation	1.1511738454284843e-4	26	Scube2, Tgfb1, Sox6, Sfrp2, Bmpr1b, Sox5, Bmp2, Gdf5, Runx3, Chadl, Scx, Hmga2, Wnt10b, Ccn3, Runx2, Ihh, Wnt9a, Fgf18, Fgf9, Slc39a14, Loxl2, Mkx, Msx2, Comp, Maf, Rflna
243	GO:0098754	BP	detoxification	5.14619559670174e-4	26	Apoe, Gsto2, Prdx5, Prdx3, Glrx, Dhfr, S100a8, S100a9, Gstm7, Duox1, Tp53inp1, Gpx2, Gpx1, Txndc2, Slc47a2, Ltc4s, Hba-a3, Ptgs2, Sod3, Gch1, Fancc, Slc17a3, Hp, Mt1, Mt3, Gstt1
244	GO:0055123	BP	digestive system development	0.016192196363374125	26	Sct, Kcnq1, Wnt11, Tgfb1, Cdkn1c, Sfrp2, Reg1a, Tigar, Ass1, Gata5, Dab1, Otc, Id2, Sox10, Clmp, Ihh, Cps1, Ccdc40, Myocd, Hlx, Kit, Fgf9, Tp63, Sall1, Cdh1, Cdkn1a
245	GO:0043271	BP	negative regulation of ion transport	0.025177394834044464	26	Kcnq1, Tgfb1, Hamp, Trdn, Kcnab1, Gstm7, Hsd3b2, Lep, Sri, Dysf, Eppin, Il1rn, Agtr2, Wnk3, Tlr9, Serpine2, Crhr1, Cd300a, Slc9a3r1, Ptgs2, Kcnrg, Ptk2b, Actn2, Wnk2, Sfrp4, Hecw1
246	GO:0035296	BP	regulation of tube diameter	0.026341331329335683	26	Apoe, P2ry2, Dusp5, F2rl1, Cftr, Tacr1, Alox5, Lep, Mgll, Adra2b, Edn3, Edn2, G6pd, Agtr2, Esr2, Chga, Avpr1a, Gpx1, Vegfa, Cps1, Ptgs2, Sod3, Gch1, Kcnma1, Comp, Cbs
247	GO:0097746	BP	blood vessel diameter maintenance	0.026341331329335683	26	Apoe, P2ry2, Dusp5, F2rl1, Cftr, Tacr1, Alox5, Lep, Mgll, Adra2b, Edn3, Edn2, G6pd, Agtr2, Esr2, Chga, Avpr1a, Gpx1, Vegfa, Cps1, Ptgs2, Sod3, Gch1, Kcnma1, Comp, Cbs
248	GO:2001257	BP	regulation of cation channel activity	0.027709962348708518	26	Kcnq1, Cnih2, Trdn, Gal, Pde4d, Homer1, Kcnab1, Gstm7, Hcn1, Sri, Dysf, Stom, Fkbp1a, Fgf13, Akap6, Rasgrf1, Shisa9, Crhr1, Cacng4, Ppargc1a, Kcnrg, Ptk2b, Actn2, App, Neto1, Rph3a
249	GO:0007612	BP	learning	0.04185735783459577	26	Sct, Rin1, Epm2a, Chrna7, Sorcs3, Fosl1, Gpr88, Tacr1, Grin2b, Snap25, Map1a, Slc24a2, Oprk1, Fgf13, Prkar2b, Lgmn, Pde1b, Chst10, Crhr1, Ptgs2, Kit, Atp8a1, Dcdc2, Kalrn, App, Neto1
250	GO:0030879	BP	mammary gland development	0.048096482682219145	26	Tgfb1, Rln1, Neurl1, Hk2, Abcb1b, Cebpb, Epha2, Alas2, Id2, Sostdc1, Vdr, Pgr, Gpx1, Vegfa, Igfbp5, Hoxb9, Nme1, Etv4, Tnfrsf11a, Serpinc1, Areg, Sfrp4, Msx2, Kalrn, Notch4, Brca2
251	GO:0050886	BP	endocrine process	1.0186281503016507e-4	25	Kcnq1, Gal, F2rl1, Tacr1, Lep, Edn3, Edn2, Oprk1, Atp6ap2, G6pd, Agtr2, Ace2, Pomc, Vdr, Tspo, Avpr1a, Ucn2, Inha, Crhr1, Gdf9, Inhbb, Kiss1, Lif, Inhba, Rab11fip1
252	GO:0030282	BP	bone mineralization	9.227315654963421e-4	25	Wnt11, Tgfb1, S1pr1, Bmpr1b, Sgms2, Alox5, Lep, Snx10, Bmp2, Zmpste24, Gata1, Wnt10b, Mtss1, Asgr2, Notum, Alox15, Ptgs2, Spp1, Ptk2b, Omd, Comp, Lox, Rflna, Tmem119, Kl
253	GO:0030278	BP	regulation of ossification	0.0015946247541494725	25	P2ry2, Scube2, Tgfb1, S1pr1, Bmpr1b, Sgms2, Tacr1, Alox5, Bmp2, Creb3l1, Zmpste24, Gata1, Vdr, Wnt10b, Runx2, Notum, Ptk2b, Mkx, Omd, Gdf10, Comp, Egr2, Rflna, Tmem119, Kl
254	GO:0006639	BP	acylglycerol metabolic process	0.0023667004264276395	25	Apoc1, Apoe, Pnliprp2, Lipe, Scd, Mgll, Lpin3, Gpat2, Mfsd2a, Dgkk, Plb1, Gpihbp1, Apoa1, Gpx1, Abhd5, Plin5, Mogat1, Cps1, Acsl6, Gpat3, Acsl1, Lpl, Lipg, Pnpla1, Scarb1
255	GO:0006638	BP	neutral lipid metabolic process	0.0027177477560457	25	Apoc1, Apoe, Pnliprp2, Lipe, Scd, Mgll, Lpin3, Gpat2, Mfsd2a, Dgkk, Plb1, Gpihbp1, Apoa1, Gpx1, Abhd5, Plin5, Mogat1, Cps1, Acsl6, Gpat3, Acsl1, Lpl, Lipg, Pnpla1, Scarb1
256	GO:0007586	BP	digestion	0.0027177477560457	25	Sct, Kcnq1, Hamp, Pnlip, Atp4a, Tacr1, Lep, Lpcat3, Snx10, Oprk1, Slc26a7, Wnk3, Vdr, Apoa1, Gcnt3, Ucn2, Tlr9, Capn8, Gpr39, Kcnma1, Akr1c2, Akr1c1, Ctrb1, Tff3, Scarb1
257	GO:0046165	BP	alcohol biosynthetic process	0.0030954694229322925	25	Apoe, Dhcr7, Dhfr, Cftr, Lep, Lpcat3, Sptlc3, Bmp2, H6pd, Dhcr24, G6pd, Sptssa, Myh9, Apoa1, Plcd1, Sphk1, Hsd17b7, Gch1, Ptk2b, Idi1, Sptlc1, Msmo1, Isyna1, Fgf1, Mvd
258	GO:0034754	BP	cellular hormone metabolic process	0.0033067348601798553	25	Lipe, Pnlip, Hsd3b2, Lrat, Hsd3b5, Hsd3b3, Hsd3b1, Bmp2, Dhrs9, Plb1, Rbp2, Cyp11a1, Chst10, Hsd17b1, Hsd11b1, Hsd17b7, Ppargc1a, Spp1, Kcnma1, Akr1c2, Akr1c3, Akr1c1, Star, Hsd17b2, Scarb1
259	GO:0048565	BP	digestive tract development	0.012026091256516842	25	Sct, Kcnq1, Wnt11, Tgfb1, Sfrp2, Reg1a, Tigar, Ass1, Gata5, Dab1, Otc, Id2, Sox10, Clmp, Ihh, Cps1, Ccdc40, Myocd, Hlx, Kit, Fgf9, Tp63, Sall1, Cdh1, Cdkn1a
260	GO:0010469	BP	regulation of signaling receptor activity	0.01658124885054903	25	Cnih2, Neurl1, Pde4d, Homer1, Adra2b, Ace2, Slc24a4, Ppara, RGD1565410, Rasgrf1, Dlgap1, Shisa9, Cacng4, Grem2, Ppargc1a, Areg, Ereg, Ramp3, Ptk2b, Plau, App, Hbegf, Neto1, Rph3a, Serpine1
261	GO:0015698	BP	inorganic anion transport	0.01975484683540109	25	Ttyh1, Abcc6, Kcnq1, Ano5, Slc22a6, Car2, Cftr, Slc4a5, Pcyox1, Cebpb, Gabrr2, Clic4, Slc26a7, Tspo, Ano4, Tg, Ano10, Ttyh2, Slc4a4, Lrrc8c, Slc39a14, Sfrp4, Slc17a3, Clic6, Slc20a2
262	GO:1904064	BP	positive regulation of cation transmembrane transport	0.027357549859359575	25	Kcnq1, Trdn, Gal, Cd19, Glrx, Gstm7, Hcn1, Sri, Dpp6, Edn3, Aplnr, Oprk1, G6pd, Ace2, Wnk3, Akap6, Thy1, Cacng4, P2rx5, Vmp1, Gpr39, Ramp3, Actn2, Wnk2, Ryr2
263	GO:0060402	BP	calcium ion transport into cytosol	0.038360441766728696	25	Tgfb1, Trpm1, Trdn, Cd19, Pde4d, Gstm7, Trpc3, Sri, Grin2b, Fkbp1a, Aplnr, Trpa1, Slc24a2, Slc24a4, Akap6, Ubash3b, Thy1, Trpv2, P2rx5, Grin2c, Gpr39, Ramp3, Ptk2b, Ryr2, Pla2g1b
264	GO:1902905	BP	positive regulation of supramolecular fiber organization	0.04185735783459577	25	Wnt11, Nphs1, Gda, Magel2, Sema5a, F2rl1, Psrc1, Tacr1, Sdc4, Nav3, Mtss1, Apoa1, Sh3pxd2b, Alox15, Pdlim4, Nf2, Rgcc, Ptk2b, Slain1, Actn2, App, Bag4, Mylk3, Hspa1a, Wasf1
265	GO:0098739	BP	import across plasma membrane	0.048096482682219145	25	Kcnq1, Slc6a5, Atp4a, Folr1, Kcnj8, Slc6a6, Slc24a2, Slc16a2, Ace2, Wnk3, Slc24a4, Slc6a20a, Acsl6, Kcnj12, Trpv2, P2rx5, Slc9a3r1, Lrrc8c, Ramp3, Atp12a, Slc39a14, Wnk2, Acsl1, Atp4b, Slc39a6
266	GO:0042475	BP	odontogenesis of dentin-containing tooth	1.1511738454284843e-4	24	Tcirg1, Perp, Tgfb1, Relt, Foxo1, Car2, Cftr, Bmp2, Tnc, Csf3r, Sostdc1, Slc24a4, Bcl11b, Ppara, Tnfrsf11b, Runx2, Wnt10a, Wnt6, Fam20a, Ngfr, Nf2, Msx2, Tp63, Serpine1
267	GO:0006641	BP	triglyceride metabolic process	2.3863380571814683e-4	24	Apoc1, Apoe, Pnliprp2, Lipe, Scd, Mgll, Lpin3, Gpat2, Mfsd2a, Plb1, Gpihbp1, Apoa1, Gpx1, Abhd5, Plin5, Mogat1, Cps1, Acsl6, Gpat3, Acsl1, Lpl, Lipg, Pnpla1, Scarb1
268	GO:0046849	BP	bone remodeling	2.3863380571814683e-4	24	Tcirg1, Tgfb1, Hamp, Syt7, Il7, S1pr1, Car2, Pdk4, Lep, Snx10, Gdf5, Epha2, Fshr, Cthrc1, Tnfrsf11b, Acp5, Ubash3b, Vegfa, Ihh, Gpr55, Tnfrsf11a, Spp1, Ptk2b, Tmem119
269	GO:0042698	BP	ovulation cycle	8.240773884742057e-4	24	Chrna7, Glrx, Bmpr1b, Ptx3, A2m, Lep, Bmp2, Edn2, Oprk1, Fshr, Esr2, Chga, Myh9, Amh, Mmp19, Pgr, Serpinf1, Gdf9, Kiss1, Ereg, Inhba, Cbr1, Adamts1, Gdf10
270	GO:0045598	BP	regulation of fat cell differentiation	0.012096119238543335	24	Arntl, Tgfb1, Foxo1, Sfrp2, Alox5, Lep, Lmo3, Frzb, Trib3, Bmp2, Cebpb, Id2, Trib2, Wnt10b, Rora, Vegfa, Sh3pxd2b, Ptgs2, Cds1, Mkx, Msx2, Lpl, Mmp11, Medag
271	GO:0055067	BP	monovalent inorganic cation homeostasis	0.02028959155461171	24	Kcnq1, Anpep, Rab38, Tcirg1, Atp4a, Rhbg, Car2, Cftr, Tacr1, Pdk4, Slc4a5, Atp6v0d2, Clic4, Atp6ap2, Otc, Agtr2, Avpr1a, Gpr39, Slc4a4, Spp1, Atp12a, Kcnma1, Atp4b, Atp6v1b2
272	GO:0072006	BP	nephron development	0.024008873408356547	24	Irx2, Gpr4, Wnt11, Tgfb1, Nphs1, Klf15, Cd44, Bmp2, Eya1, Agtr2, Six4, Mtss1, Vegfa, Col4a3, Wnt6, Pecam1, Wnt9b, Sox8, Kif26b, Nphs2, Lif, Angpt2, Fgf1, Sall1
273	GO:0055088	BP	lipid homeostasis	0.03146332899016684	24	Apoc4, Apoe, Tgfb1, Scd, Fabp4, Tlcd4, Abcb1b, Mia2, Angptl4, Tspo, Soat2, Gpihbp1, Apoa1, Angptl8, Rora, Abhd5, Nfe2l1, Asgr2, Gpr39, Lpl, Tm6sf2, Lipg, Pnpla1, Scarb1
274	GO:0010675	BP	regulation of cellular carbohydrate metabolic process	0.034535551473601475	24	Pgam1, Foxo1, Pdk4, Lep, Tigar, Obp2a, C1qtnf12, Zmpste24, Pomc, Ppara, Myh9, Avpr1a, Rora, Plcd1, Erfe, Nfe2l1, Hsd11b1, Ppargc1a, Igfbp3, Ptk2b, Ppp1r3g, Gpt2, Tff3, Acacb
275	GO:1903034	BP	regulation of response to wounding	0.043303874864911454	24	Apoe, Klk8, Smoc2, Cadm4, F2rl1, Anxa5, S100a9, Alox5, Fermt1, Duox1, Tafa5, Ubash3b, Anxa2, Serpine2, Epha4, Tnfrsf12a, Actg1, Serpinc1, Spp1, Plau, Phldb2, Insl3, Hbegf, Serpine1
276	GO:0098869	BP	cellular oxidant detoxification	1.809650369569519e-4	23	Apoe, Gsto2, Prdx5, Prdx3, Glrx, Dhfr, S100a8, S100a9, Gstm7, Duox1, Tp53inp1, Gpx2, Gpx1, Txndc2, Ltc4s, Hba-a3, Ptgs2, Sod3, Gch1, Fancc, Hp, Mt3, Gstt1
277	GO:1990748	BP	cellular detoxification	0.001259579491115318	23	Apoe, Gsto2, Prdx5, Prdx3, Glrx, Dhfr, S100a8, S100a9, Gstm7, Duox1, Tp53inp1, Gpx2, Gpx1, Txndc2, Ltc4s, Hba-a3, Ptgs2, Sod3, Gch1, Fancc, Hp, Mt3, Gstt1
278	GO:0032368	BP	regulation of lipid transport	0.002855538748282473	23	Apoc1, Apoe, P2ry2, Gal, Lrat, Lep, Abcb1b, Lpcat3, Agtr2, Pomc, Tspo, Apoa1, Anxa2, Erfe, Acsl6, Crhr1, Gdf9, Tnfrsf11a, Atp8a1, Spp1, Igfbp3, Acsl1, Lipg
279	GO:0097237	BP	cellular response to toxic substance	0.004226599287072079	23	Apoe, Gsto2, Prdx5, Prdx3, Glrx, Dhfr, S100a8, S100a9, Gstm7, Duox1, Tp53inp1, Gpx2, Gpx1, Txndc2, Ltc4s, Hba-a3, Ptgs2, Sod3, Gch1, Fancc, Hp, Mt3, Gstt1
280	GO:0010565	BP	regulation of cellular ketone metabolic process	0.014474013475634904	23	Apoc1, Pdk4, Prkag2, Trib3, Bmp2, Obp2a, H6pd, Mfsd2a, Mid1ip1, Ppara, Avpr1a, Apoa1, Erfe, Plin5, Nfe2l1, Brca1, Ptgs2, Ppargc1a, Kcnma1, Akr1c3, Star, Tysnd1, Acacb
281	GO:0001508	BP	action potential	0.023467413154902923	23	Gna14, Kcnq1, Chrna7, Gpr88, Trpc4, Hcn1, Tacr1, Dpp6, Grin2b, Kcnj8, Trpa1, Ptpn3, Oprk1, Fgf13, Scn8a, Scn3b, Chrnb4, Chrna5, Kcnma1, Dcdc2, Ryr2, Kcnn2, Ctnna3
282	GO:0035637	BP	multicellular organismal signaling	0.027438512459011376	23	Kcnq1, Chrna7, Trdn, S1pr1, Gpr88, Sri, Dpp6, Trpa1, Oprk1, Zmpste24, Ace2, Avpr1a, Scn8a, Tmem65, Scn3b, Chrnb4, Chrna5, Cacng4, Kcnma1, Dcdc2, Ryr2, Kcnn2, Ctnna3
283	GO:0008037	BP	cell recognition	0.02905953694260322	23	Mfge8, Zp1, Folr1, Tub, Sema5a, Ptx3, Atp8b3, Adgrb1, Cadm1, Robo3, Ephb1, Epha4, Efnb3, C4bpb, Prss55, H1f6, Masp1, Gap43, App, Ncam2, Sftpd, Megf10, Scarb1
284	GO:0022612	BP	gland morphogenesis	0.03939358855176035	23	Tgfb1, Rln1, Cd44, Cebpb, Epha2, Tnc, Sostdc1, Esr2, Vdr, Ntn4, Pgr, Igfbp5, Slc9a3r1, Fgf18, Etv4, Areg, Plau, Sfrp4, Msx2, Tp63, Fgf1, Cdh1, Lims1
285	GO:0035270	BP	endocrine system development	0.04958912971929985	23	Arntl, Wnt11, Cdkn1c, Pcsk1, Hsd3b1, Cftr, Reg1a, Rheb, Bmp2, Lhx3, Nr0b1, Hmga2, Tspo, Tg, Fstl3, Apoa1, Fdx1, Crhr1, Inhbb, Pitx1, Onecut2, Sall1, Cdh1
286	GO:0070542	BP	response to fatty acid	3.466657047339154e-4	22	Kcnk4, LOC681458, Scd, Pcsk1, Foxo1, Hsd3b1, Pdk4, Ass1, Cpt2, Alas2, Cps1, Nme1, Ptgs2, Ppargc1a, Akr1c2, Akr1c3, Akr1c1, Ildr1, Acsl1, Lpl, Plat, Hspb1
287	GO:0016525	BP	negative regulation of angiogenesis	0.0015391784093408487	22	Gpr4, Plk2, Alox5, Gadd45a, Adamts9, Creb3l1, Epha2, Pgk1, Tafa5, Adgrb1, Minar1, Col4a3, Serpinf1, Ngfr, Lif, Pf4, Rgcc, Adamts1, Angpt2, Col4a2, Serpine1, Flt1
288	GO:2000181	BP	negative regulation of blood vessel morphogenesis	0.0018607011412882903	22	Gpr4, Plk2, Alox5, Gadd45a, Adamts9, Creb3l1, Epha2, Pgk1, Tafa5, Adgrb1, Minar1, Col4a3, Serpinf1, Ngfr, Lif, Pf4, Rgcc, Adamts1, Angpt2, Col4a2, Serpine1, Flt1
289	GO:1901343	BP	negative regulation of vasculature development	0.0020811521326266403	22	Gpr4, Plk2, Alox5, Gadd45a, Adamts9, Creb3l1, Epha2, Pgk1, Tafa5, Adgrb1, Minar1, Col4a3, Serpinf1, Ngfr, Lif, Pf4, Rgcc, Adamts1, Angpt2, Col4a2, Serpine1, Flt1
290	GO:0001676	BP	long-chain fatty acid metabolic process	0.002926815085545591	22	Lipe, Aig1, Cyp2b1, Gstm7, Elovl6, Alox5, Mgll, Acot7, Cpt2, Acot9, Acot4, Acot2, Acot1, Acsbg1, Gpx1, Acsl3, Acsl6, Sphk1, Ltc4s, Alox15, Ptgs2, Acsl1
291	GO:0071774	BP	response to fibroblast growth factor	0.008317249490757385	22	Smoc2, Fgf3, Scgb1a1, Hsd3b1, Cd44, Flrt3, Creb3l1, Tnc, Cyp11a1, Vegfa, Runx2, Gpc1, Cps1, Fgf18, Ngfr, Fgf9, Star, Fgf1, Spry4, Hhip, Serpine1, Kl
292	GO:0050680	BP	negative regulation of epithelial cell proliferation	0.03466731250201175	22	Apoe, Tgfb1, Cdkn1c, Sfrp2, Alox5, Gdf5, Runx3, Cdkn2b, Esr2, Vdr, Wnt10b, Mtss1, Col4a3, Serpinf1, Etv4, Ngfr, Rgcc, Cdh1, Marveld3, Lims1, Brca2, Flt1
293	GO:0050921	BP	positive regulation of chemotaxis	0.0471322396046711	22	Smoc2, Tgfb1, S1pr1, Sema5a, F2rl1, Dysf, Edn3, Edn2, Lgmn, Vegfa, Cxcr2, Scg2, Fgf18, Tmem102, Slamf1, Tnfsf18, Ptk2b, Cxcl14, App, Il34, Serpine1, Hspb1
294	GO:0097553	BP	calcium ion transmembrane import into cytosol	0.049461594159732496	22	Tgfb1, Trdn, Cd19, Pde4d, Gstm7, Sri, Grin2b, Fkbp1a, Aplnr, Trpa1, Slc24a2, Slc24a4, Akap6, Ubash3b, Thy1, Trpv2, P2rx5, Grin2c, Gpr39, Ramp3, Ptk2b, Ryr2
295	GO:0006637	BP	acyl-CoA metabolic process	2.171337864956135e-4	21	Acsm5, Elovl6, Pdk4, Acot7, Acot9, Dlst, Acot4, Acot2, Acot1, Acsl3, Acsl6, Pipox, Mpc2, Ogdh, Sucla2, Oxsm, Acsl1, Aadat, Acaa2, Mvd, Acacb
296	GO:0035383	BP	thioester metabolic process	2.171337864956135e-4	21	Acsm5, Elovl6, Pdk4, Acot7, Acot9, Dlst, Acot4, Acot2, Acot1, Acsl3, Acsl6, Pipox, Mpc2, Ogdh, Sucla2, Oxsm, Acsl1, Aadat, Acaa2, Mvd, Acacb
297	GO:1905954	BP	positive regulation of lipid localization	0.0013394487035954536	21	Apoc4, Apoe, P2ry2, Gal, Lrat, Abcb1b, Lpcat3, Plin2, Apoa1, Anxa2, Erfe, Plin5, Acsl6, Tnfrsf11a, Atp8a1, Spp1, Acsl1, Lpl, Lipg, Scarb1, Acacb
298	GO:0033865	BP	nucleoside bisphosphate metabolic process	0.0027183614606062887	21	Acsm5, Elovl6, Pdk4, Acot7, Acot9, Dlst, Acot4, Acot2, Acot1, Acsl3, Acsl6, Pipox, Mpc2, Ogdh, Sucla2, Oxsm, Acsl1, Aadat, Acaa2, Mvd, Acacb
299	GO:0033875	BP	ribonucleoside bisphosphate metabolic process	0.0027183614606062887	21	Acsm5, Elovl6, Pdk4, Acot7, Acot9, Dlst, Acot4, Acot2, Acot1, Acsl3, Acsl6, Pipox, Mpc2, Ogdh, Sucla2, Oxsm, Acsl1, Aadat, Acaa2, Mvd, Acacb
300	GO:0034032	BP	purine nucleoside bisphosphate metabolic process	0.0027183614606062887	21	Acsm5, Elovl6, Pdk4, Acot7, Acot9, Dlst, Acot4, Acot2, Acot1, Acsl3, Acsl6, Pipox, Mpc2, Ogdh, Sucla2, Oxsm, Acsl1, Aadat, Acaa2, Mvd, Acacb
301	GO:0072009	BP	nephron epithelium development	0.010458836961440015	21	Irx2, Wnt11, Tgfb1, Nphs1, Klf15, Cd44, Bmp2, Eya1, Agtr2, Six4, Mtss1, Vegfa, Wnt6, Pecam1, Wnt9b, Sox8, Kif26b, Nphs2, Lif, Fgf1, Sall1
302	GO:0042303	BP	molting cycle	0.01353263021536555	21	Arntl, Gal, Lrig1, Fermt1, Runx3, Zmpste24, Sostdc1, Wnt10b, Krt71, Mpzl3, Wnt10a, Farp2, Igfbp5, Ngfr, Ptgs2, Tnfrsf19, Msx2, Inhba, Tp63, Fa2h, Tspear
303	GO:0042633	BP	hair cycle	0.01353263021536555	21	Arntl, Gal, Lrig1, Fermt1, Runx3, Zmpste24, Sostdc1, Wnt10b, Krt71, Mpzl3, Wnt10a, Farp2, Igfbp5, Ngfr, Ptgs2, Tnfrsf19, Msx2, Inhba, Tp63, Fa2h, Tspear
304	GO:0061041	BP	regulation of wound healing	0.01991716288928479	21	Apoe, Smoc2, Cadm4, F2rl1, Anxa5, S100a9, Alox5, Fermt1, Duox1, Tafa5, Ubash3b, Anxa2, Serpine2, Tnfrsf12a, Actg1, Serpinc1, Plau, Phldb2, Insl3, Hbegf, Serpine1
305	GO:0015748	BP	organophosphate ester transport	0.027357549859359575	21	Abcc6, Apoc1, Apoe, Psd, Abca4, Abcb1b, Slc25a25, Cptp, Mfsd2a, Ano4, Atp8b3, Apoa1, Plscr1, Vapa, Vmp1, Pctp, Atp8a1, Lrrc8c, Abcc4, Xkr5, Scarb1
306	GO:0051928	BP	positive regulation of calcium ion transport	0.04366825320333039	21	Trdn, Cd19, Homer1, Gstm7, Trpc3, Sri, Aplnr, G6pd, Wnk3, Akap6, Tspo, Thy1, Trpv2, P2rx5, Vmp1, Gpr39, Ramp3, Ryr2, Camk2a, Serpine1, Pla2g1b
307	GO:0034698	BP	response to gonadotropin	3.624296693168514e-5	20	Hsd3b2, Hsd3b1, Asns, Tox2, Gata1, Fshr, Id2, Esr2, Pgr, Fdx1, Cyp11a1, Inhbb, Ppargc1a, Epha5, Akr1c3, Inhba, Cbr1, Star, Plat, Serpine1
308	GO:0110149	BP	regulation of biomineralization	0.003912889991186442	20	Tgfb1, S1pr1, Bmpr1b, Sgms2, Cftr, Alox5, Bmp2, Cebpb, Zmpste24, Gata1, Wnt10b, Wnt6, Notum, Ptk2b, Omd, Ucma, Comp, Rflna, Tmem119, Kl
309	GO:0007229	BP	integrin-mediated signaling pathway	0.006322639754407821	20	Itgad, Itga10, Vav3, Adamts9, Fermt1, Cdh17, Timp1, Apoa1, Thy1, Sema7a, Itgae, Tec, Txk, Adamts3, Ptk2b, Itga8, Adamts1, Bcar1, Lims1, Mpig6b
310	GO:0022600	BP	digestive system process	0.014407309208434575	20	Sct, Kcnq1, Hamp, Pnlip, Atp4a, Tacr1, Lep, Lpcat3, Snx10, Oprk1, Slc26a7, Wnk3, Vdr, Apoa1, Gcnt3, Tlr9, Gpr39, Kcnma1, Tff3, Scarb1
311	GO:0044344	BP	cellular response to fibroblast growth factor stimulus	0.01620007098172079	20	Smoc2, Fgf3, Hsd3b1, Cd44, Flrt3, Creb3l1, Cyp11a1, Vegfa, Runx2, Gpc1, Cps1, Fgf18, Ngfr, Fgf9, Star, Fgf1, Spry4, Hhip, Serpine1, Kl
312	GO:0043406	BP	positive regulation of MAP kinase activity	0.023178275119399256	20	Tgfb1, Rasgrp1, Il1rn, Edn3, Tlr9, Vegfa, Epha4, Fgf18, Gdf9, Gpr39, Tnfrsf11a, Kit, Ptk2b, Nek10, Map3k13, App, Fgf1, Il34, Pla2g1b, Flt1
313	GO:0014812	BP	muscle cell migration	0.024362466669259477	20	P2ry2, Pde4d, Tacr1, Six4, Tafa5, Myh9, Ccn3, Trib1, Pgr, Igfbp5, Myocd, Ppargc1a, Igfbp3, Fgf9, Plau, Kalrn, Adamts1, Plat, Megf10, Serpine1
314	GO:2000027	BP	regulation of animal organ morphogenesis	0.02942751966834569	20	Wnt11, Tgfb1, Fgf3, Sfrp2, Bmp2, Gata5, Agtr2, Six4, Cthrc1, Ntn4, Tnfrsf11b, Vegfa, Runx2, Wnt10a, Wnt9b, Sox8, Ngfr, Fgf1, Sall1, Cdh1
315	GO:0033559	BP	unsaturated fatty acid metabolic process	0.03302618861470954	20	Cyp2b1, LOC681458, Scd, Fads2, Gstm7, Elovl6, Alox5, Akr1b7, Mgll, Ptgds, Edn2, Avpr1a, Gpx1, Sphk1, Alox15, Ptgs2, Akr1c2, Akr1c3, Elovl2, Akr1c1
316	GO:0009582	BP	detection of abiotic stimulus	0.04112196790107385	20	Kcnq1, Kcnk4, Gnat2, Gpr88, Sema5a, Grm8, Grin2b, Ttn, Trpa1, Slc24a2, Slc24a4, Ephb1, Chrna5, Serpine2, Tcap, Ngfr, Crb1, Kit, Ccdc66, Drgx
317	GO:0009581	BP	detection of external stimulus	0.04317224701106146	20	Kcnq1, Kcnk4, Gnat2, Gpr88, Sema5a, Grm8, Grin2b, Ttn, Trpa1, Slc24a2, Slc24a4, Ephb1, Chrna5, Serpine2, Tcap, Ngfr, Crb1, Kit, Ccdc66, Drgx
318	GO:0042446	BP	hormone biosynthetic process	6.355067050687338e-5	19	Dhcr7, Chst8, Hsd3b2, Hsd3b1, Bmp2, Duox1, H6pd, Dio3, Dio2, Tg, Fdx1, Cyp11a1, Stc2, Hsd17b1, Hsd17b7, Ppargc1a, Star, Hsd17b2, Scarb1
319	GO:0071320	BP	cellular response to cAMP	3.2622261518709607e-4	19	Kcnq1, Pde4d, Hcn1, Hsd3b1, Cftr, Ass1, Gata1, Akap6, Gpd1, Wnt10b, Aqp9, Fdx1, Cyp11a1, Cps1, Igfbp5, Inhbb, App, Star, Serpine1
320	GO:0070167	BP	regulation of biomineral tissue development	0.007252808374983631	19	Tgfb1, S1pr1, Bmpr1b, Sgms2, Cftr, Alox5, Bmp2, Cebpb, Zmpste24, Gata1, Wnt10b, Wnt6, Notum, Ptk2b, Omd, Comp, Rflna, Tmem119, Kl
321	GO:0060993	BP	kidney morphogenesis	0.008730808512824083	19	Irx2, Wnt11, Tgfb1, Cd44, Bmp2, Eya1, Zmpste24, Agtr2, Six4, Gcnt3, Vegfa, Wnt6, Wnt9b, Sox8, Kif26b, Lif, Fras1, Fgf1, Sall1
322	GO:0014897	BP	striated muscle hypertrophy	0.01618681301132941	19	Hamp, Foxo1, Pdlim5, Trpc3, Lep, Klf15, Ttn, Gata5, Trim63, G6pd, Agtr2, Akap6, Ppara, Igfbp5, Tcap, Myocd, Myh6, Myh7, Ryr2
323	GO:0019218	BP	regulation of steroid metabolic process	0.017356114397984117	19	Apoe, Dhcr7, Gal, Hsd3b5, Lep, Lpcat3, Bmp2, H6pd, Nr0b1, Tspo, Dhh, Apoa1, Rora, Ppargc1a, Kit, Kcnma1, Akr1c3, Star, Fgf1
324	GO:0014896	BP	muscle hypertrophy	0.01879086024216917	19	Hamp, Foxo1, Pdlim5, Trpc3, Lep, Klf15, Ttn, Gata5, Trim63, G6pd, Agtr2, Akap6, Ppara, Igfbp5, Tcap, Myocd, Myh6, Myh7, Ryr2
325	GO:1902414	BP	protein localization to cell junction	0.024405740098825714	19	Actn4, Nphs1, Dlg2, Homer1, Pclo, Clstn3, Snap25, Map1a, Bsn, Rab11a, Dlgap1, Pecam1, Grin2c, Actg1, Kalrn, Ildr1, Camk2a, Marveld3, Hspb1
326	GO:0006090	BP	pyruvate metabolic process	0.029466032674006343	19	Pgam1, Pdk4, Hk2, Tigar, Prkag2, Slc2a6, Pgk1, Ppara, Gpd1, LOC691137, Mpc2, Ppargc1a, Slc4a4, Ogdh, Pgam2, Pfkfb3, App, Hk1, Hkdc1
327	GO:0021766	BP	hippocampus development	0.03178041698754362	19	Sct, Dclk2, Hsd3b2, Hsd3b5, Hsd3b3, Hsd3b1, Grin2b, Dab1, Mfsd2a, Fgf13, Cyp11a1, Chrna5, Nme1, Kif14, Hsd17b7, Epha5, Nefh, Ogdh, Nf2
328	GO:0015837	BP	amine transport	0.035284426088385404	19	Chrna7, Syt7, Lep, Grin2b, Il1rn, Syt13, Oprk1, Agtr2, Ace2, Chga, Avpr1a, Slc38a3, Aqp9, Plcd1, Chrna3, Crhr1, Kmo, Ddc, Rab3a
329	GO:0014013	BP	regulation of gliogenesis	0.0398294597346846	19	Tgfb1, Clcf1, Rheb, Bmp2, Dab1, Cdkn2b, Id2, Mycn, Sox10, Hmga2, Tspo, Serpine2, Sox8, Gpr37l1, Lif, Nf2, Il34, Egr2, Flt1
330	GO:0015718	BP	monocarboxylic acid transport	0.04185735783459577	19	P2ry2, Nmb, Slc16a4, Lep, Abcb1b, Aqp9, Slco2a1, Slc16a6, Slc9a3r1, Slc16a5, Proca1, Slc16a11, Ptgs2, Mpc2, Tnfrsf11a, Abcc4, Slc51a, Slc10a2, Pla2g1b
331	GO:0060986	BP	endocrine hormone secretion	3.248840254294205e-4	18	Kcnq1, Gal, Lep, Oprk1, Agtr2, Pomc, Vdr, Tspo, Avpr1a, Ucn2, Inha, Crhr1, Gdf9, Inhbb, Kiss1, Lif, Inhba, Rab11fip1
332	GO:0022602	BP	ovulation cycle process	8.633610960777663e-4	18	Chrna7, Glrx, Bmpr1b, Ptx3, A2m, Lep, Edn2, Fshr, Myh9, Amh, Mmp19, Pgr, Gdf9, Kiss1, Ereg, Inhba, Cbr1, Adamts1
333	GO:0045453	BP	bone resorption	0.001298466317151063	18	Tcirg1, Hamp, Il7, S1pr1, Car2, Pdk4, Snx10, Fshr, Tnfrsf11b, Acp5, Ubash3b, Vegfa, Ihh, Gpr55, Tnfrsf11a, Spp1, Ptk2b, Tmem119
334	GO:0043954	BP	cellular component maintenance	0.0029043115949966085	18	Apoe, Plekha7, Dlg2, Homer1, F2rl1, Pclo, Grin2b, Mtss1, Cadm1, Bsn, Dlgap1, Rims1, Myocd, App, Rab3a, Erc2, Cbln1, Kifc3
335	GO:0001541	BP	ovarian follicle development	0.003912889991186442	18	Bmpr1b, Ptx3, Nobox, Cebpb, Bmp15, Fshr, Immp2l, Esr2, Myh9, Amh, Mmp19, Vegfa, Inha, Gdf9, Kit, Ereg, Inhba, Vgf
336	GO:0060135	BP	maternal process involved in female pregnancy	0.003912889991186442	18	Prdx3, Hsd3b1, Alas2, Ace2, Vdr, Pgr, Cyp11a1, Ihh, Stc2, Ptgs2, Kiss1, Hsd17b7, Lif, Sfrp4, Angpt2, Cdh1, Cbs, Serpine1
337	GO:0046888	BP	negative regulation of hormone secretion	0.010206383226035847	18	Kcnq1, Nmb, Gal, Anxa5, Lep, Edn3, Edn2, Oprk1, Chga, Tspo, Ccn3, Ucn2, Inha, Inhbb, Lif, Igfbp3, Kalrn, Rab11fip1
338	GO:0019217	BP	regulation of fatty acid metabolic process	0.013575577497603582	18	Apoc1, Pdk4, Prkag2, Trib3, Obp2a, Mfsd2a, Mid1ip1, Ppara, Avpr1a, Apoa1, Erfe, Plin5, Nfe2l1, Brca1, Ptgs2, Ppargc1a, Tysnd1, Acacb
339	GO:0001657	BP	ureteric bud development	0.023105555157842524	18	Wnt11, Tgfb1, Vcan, Cd44, Bmp2, Sdc4, Eya1, Agtr2, Sdc1, Six4, Vegfa, Wnt6, Wnt9b, Sox8, Kif26b, Crlf1, Fgf1, Sall1
340	GO:0003300	BP	cardiac muscle hypertrophy	0.023105555157842524	18	Hamp, Foxo1, Pdlim5, Trpc3, Lep, Klf15, Ttn, Gata5, Trim63, G6pd, Agtr2, Akap6, Ppara, Tcap, Myocd, Myh6, Myh7, Ryr2
341	GO:0030004	BP	cellular monovalent inorganic cation homeostasis	0.023105555157842524	18	Rab38, Tcirg1, Atp4a, Car2, Cftr, Slc4a5, Atp6v0d2, Clic4, Atp6ap2, Agtr2, Avpr1a, Gpr39, Slc4a4, Spp1, Atp12a, Kcnma1, Atp4b, Atp6v1b2
342	GO:0061326	BP	renal tubule development	0.023105555157842524	18	Irx2, Wnt11, Tgfb1, Cd44, Bmp2, Eya1, Agtr2, Six4, Mtss1, Vegfa, Wnt6, Wnt9b, Sox8, Kif26b, Lif, Col4a1, Fgf1, Sall1
343	GO:0072163	BP	mesonephric epithelium development	0.024362466669259477	18	Wnt11, Tgfb1, Vcan, Cd44, Bmp2, Sdc4, Eya1, Agtr2, Sdc1, Six4, Vegfa, Wnt6, Wnt9b, Sox8, Kif26b, Crlf1, Fgf1, Sall1
344	GO:0072164	BP	mesonephric tubule development	0.024362466669259477	18	Wnt11, Tgfb1, Vcan, Cd44, Bmp2, Sdc4, Eya1, Agtr2, Sdc1, Six4, Vegfa, Wnt6, Wnt9b, Sox8, Kif26b, Crlf1, Fgf1, Sall1
345	GO:0006165	BP	nucleoside diphosphate phosphorylation	0.02968477425662145	18	Pgam1, Hk2, Tigar, Prkag2, Slc2a6, Pgk1, Ppara, Gpd1, LOC691137, Nme1, Ppargc1a, Slc4a4, Ogdh, Pgam2, Pfkfb3, App, Hk1, Hkdc1
346	GO:0001823	BP	mesonephros development	0.031799951240424854	18	Wnt11, Tgfb1, Vcan, Cd44, Bmp2, Sdc4, Eya1, Agtr2, Sdc1, Six4, Vegfa, Wnt6, Wnt9b, Sox8, Kif26b, Crlf1, Fgf1, Sall1
347	GO:0014909	BP	smooth muscle cell migration	0.031799951240424854	18	P2ry2, Pde4d, Tacr1, Tafa5, Myh9, Ccn3, Trib1, Pgr, Igfbp5, Myocd, Ppargc1a, Igfbp3, Fgf9, Plau, Kalrn, Adamts1, Plat, Serpine1
348	GO:0010522	BP	regulation of calcium ion transport into cytosol	0.03566679497330977	18	Tgfb1, Trdn, Cd19, Pde4d, Gstm7, Trpc3, Sri, Fkbp1a, Aplnr, Akap6, Ubash3b, Thy1, P2rx5, Gpr39, Ramp3, Ptk2b, Ryr2, Pla2g1b
349	GO:0046939	BP	nucleotide phosphorylation	0.03566679497330977	18	Pgam1, Hk2, Tigar, Prkag2, Slc2a6, Pgk1, Ppara, Gpd1, LOC691137, Nme1, Ppargc1a, Slc4a4, Ogdh, Pgam2, Pfkfb3, App, Hk1, Hkdc1
350	GO:0060349	BP	bone morphogenesis	0.03566679497330977	18	Scube2, Tgfb1, Sfrp2, Sp5, Zmpste24, Ripply1, Scx, Acp5, Ltf, Runx2, Ihh, Fgf18, Sfrp4, Msx2, Comp, Cbs, Col13a1, Tmem119
351	GO:0060079	BP	excitatory postsynaptic potential	0.038360441766728696	18	Chrna7, Pclo, Grin2b, Chrnb4, Chrna3, Chrna5, Rims1, P2rx5, Grin2c, Sez6, Chrnb1, Ngfr, Ptk2b, App, Neto1, Cbln1, Cux2, Prkar1b
352	GO:0044060	BP	regulation of endocrine process	1.0600244931751399e-4	17	Gal, F2rl1, Lep, Oprk1, Agtr2, Pomc, Vdr, Tspo, Avpr1a, Ucn2, Inha, Crhr1, Gdf9, Inhbb, Kiss1, Lif, Inhba
353	GO:0010043	BP	response to zinc ion	0.0010189062963215005	17	Apoe, Hamp, S100a8, S100a9, Car2, Ass1, Slc30a2, Otc, Tspo, Acp5, Hmbs, Gsta4, Cps1, P2rx5, Gpr39, Mt1, Mt3
354	GO:0048168	BP	regulation of neuronal synaptic plasticity	0.003885131245561177	17	Neurl1, Grin2b, Rheb, Rasgrf1, Rab11a, Rims1, Shisa9, Kit, Kalrn, App, Rab3a, Star, Kcnn2, Camk2a, Neto1, Egr2, Vgf
355	GO:0061333	BP	renal tubule morphogenesis	0.008349945523644637	17	Irx2, Wnt11, Tgfb1, Cd44, Bmp2, Eya1, Agtr2, Six4, Mtss1, Vegfa, Wnt6, Wnt9b, Sox8, Kif26b, Col4a1, Fgf1, Sall1
356	GO:0048708	BP	astrocyte differentiation	0.010379926780097415	17	Sox6, Clcf1, S100a8, S100a9, Bmp2, Dab1, Id2, Mycn, Hmga2, Hmbs, Serpine2, Epha4, Sox8, Gpr37l1, Lif, App, Mt3
357	GO:0006096	BP	glycolytic process	0.01311213077150823	17	Pgam1, Hk2, Tigar, Prkag2, Slc2a6, Pgk1, Ppara, Gpd1, LOC691137, Ppargc1a, Slc4a4, Ogdh, Pgam2, Pfkfb3, App, Hk1, Hkdc1
358	GO:0006757	BP	ATP generation from ADP	0.014201463957639429	17	Pgam1, Hk2, Tigar, Prkag2, Slc2a6, Pgk1, Ppara, Gpd1, LOC691137, Ppargc1a, Slc4a4, Ogdh, Pgam2, Pfkfb3, App, Hk1, Hkdc1
359	GO:0002028	BP	regulation of sodium ion transport	0.015319386762117883	17	Kcnq1, Tgfb1, Fxyd5, Nkain2, Fxyd7, Glrx, Stom, Nkain1, Ptpn3, Fgf13, Wnk3, Scn3b, Serpine2, Slc9a3r1, Wnk2, Hecw1, Neto1
360	GO:0043648	BP	dicarboxylic acid metabolic process	0.016311199814262045	17	Folr1, Qprt, Dhfr, Aldh1l1, Ass1, Iffo2, Dlst, Acot4, Amdhd1, Idh1, Nags, Kmo, Ogdh, Sucla2, Aadat, Gpt2, Ggt1
361	GO:0007200	BP	phospholipase C-activating G protein-coupled receptor signaling pathway	0.020763644282509697	17	Gpr4, Gna14, P2ry2, S1pr1, F2rl1, F2rl2, Oprk1, Fshr, Chga, Myh9, Plcd1, Cxcr2, Gpr55, Crhr1, Slc9a3r1, Kiss1, Actn2
362	GO:0015908	BP	fatty acid transport	0.027709962348708518	17	Apoe, P2ry2, Nmb, Fabp4, Cpt2, Plin2, Mfsd2a, Agtr2, Rbp2, Erfe, Acsl3, Acsl6, Proca1, Fabp6, Tnfrsf11a, Acsl1, Pla2g1b
363	GO:0046031	BP	ADP metabolic process	0.027709962348708518	17	Pgam1, Hk2, Tigar, Prkag2, Slc2a6, Pgk1, Ppara, Gpd1, LOC691137, Ppargc1a, Slc4a4, Ogdh, Pgam2, Pfkfb3, App, Hk1, Hkdc1
364	GO:0072080	BP	nephron tubule development	0.027709962348708518	17	Irx2, Wnt11, Tgfb1, Cd44, Bmp2, Eya1, Agtr2, Six4, Mtss1, Vegfa, Wnt6, Wnt9b, Sox8, Kif26b, Lif, Fgf1, Sall1
365	GO:0055013	BP	cardiac muscle cell development	0.03589477630885808	17	Alpk3, Hamp, Pdlim5, Neb, Ttn, Zmpste24, G6pd, Agtr2, Akap6, Ppara, Vegfa, Tcap, Myocd, Sgcd, Myh6, Actn2, Mylk3
366	GO:0022404	BP	molting cycle process	0.03837066722479409	17	Gal, Lrig1, Fermt1, Runx3, Zmpste24, Sostdc1, Wnt10b, Krt71, Wnt10a, Farp2, Igfbp5, Ngfr, Tnfrsf19, Msx2, Inhba, Tp63, Tspear
367	GO:0022405	BP	hair cycle process	0.03837066722479409	17	Gal, Lrig1, Fermt1, Runx3, Zmpste24, Sostdc1, Wnt10b, Krt71, Wnt10a, Farp2, Igfbp5, Ngfr, Tnfrsf19, Msx2, Inhba, Tp63, Tspear
368	GO:0009135	BP	purine nucleoside diphosphate metabolic process	0.04322071457349951	17	Pgam1, Hk2, Tigar, Prkag2, Slc2a6, Pgk1, Ppara, Gpd1, LOC691137, Ppargc1a, Slc4a4, Ogdh, Pgam2, Pfkfb3, App, Hk1, Hkdc1
369	GO:0009179	BP	purine ribonucleoside diphosphate metabolic process	0.04322071457349951	17	Pgam1, Hk2, Tigar, Prkag2, Slc2a6, Pgk1, Ppara, Gpd1, LOC691137, Ppargc1a, Slc4a4, Ogdh, Pgam2, Pfkfb3, App, Hk1, Hkdc1
370	GO:0055006	BP	cardiac cell development	0.049461594159732496	17	Alpk3, Hamp, Pdlim5, Neb, Ttn, Zmpste24, G6pd, Agtr2, Akap6, Ppara, Vegfa, Tcap, Myocd, Sgcd, Myh6, Actn2, Mylk3
371	GO:0061035	BP	regulation of cartilage development	0.003306318035920114	16	Tgfb1, Sox6, Lep, Sox5, Frzb, Bmp2, Gdf5, Chadl, Scx, Runx2, Wnt9a, Fgf18, Loxl2, Mkx, Maf, Rflna
372	GO:0070373	BP	negative regulation of ERK1 and ERK2 cascade	0.008349945523644637	16	Chrna7, Nlrp6, Gbp1, Lmo3, Ace2, Rps6ka6, Ptprr, Dusp6, Tlr9, Epha4, Slc9a3r1, Atf3, Lif, Wnk2, Dusp4, Spry4
373	GO:0030500	BP	regulation of bone mineralization	0.012475381751512565	16	Tgfb1, S1pr1, Bmpr1b, Sgms2, Alox5, Bmp2, Zmpste24, Gata1, Wnt10b, Notum, Ptk2b, Omd, Comp, Rflna, Tmem119, Kl
374	GO:0072088	BP	nephron epithelium morphogenesis	0.012475381751512565	16	Irx2, Wnt11, Tgfb1, Cd44, Bmp2, Eya1, Agtr2, Six4, Vegfa, Wnt6, Wnt9b, Sox8, Kif26b, Lif, Fgf1, Sall1
375	GO:0072028	BP	nephron morphogenesis	0.015968276889943706	16	Irx2, Wnt11, Tgfb1, Cd44, Bmp2, Eya1, Agtr2, Six4, Vegfa, Wnt6, Wnt9b, Sox8, Kif26b, Lif, Fgf1, Sall1
376	GO:0019915	BP	lipid storage	0.017020242699499075	16	Apoc4, Apoe, Ldaf1, Lep, Mest, Dysf, Plin2, Ppara, Sqle, Apoa1, Abhd5, Plin5, Cds1, Lpl, Scarb1, Acacb
377	GO:0006885	BP	regulation of pH	0.027357549859359575	16	Rab38, Tcirg1, Atp4a, Car2, Cftr, Pdk4, Slc4a5, Atp6v0d2, Clic4, Atp6ap2, Avpr1a, Gpr39, Slc4a4, Atp12a, Atp4b, Atp6v1b2
378	GO:0015914	BP	phospholipid transport	0.031795359478621735	16	Apoc1, Apoe, Abca4, Abcb1b, Cptp, Mfsd2a, Ano4, Atp8b3, Apoa1, Plscr1, Vapa, Vmp1, Pctp, Atp8a1, Xkr5, Scarb1
379	GO:0001656	BP	metanephros development	0.03589477630885808	16	Irx2, Eya1, Agtr2, Id2, Six4, Mtss1, Ctsh, Cxcr2, Wnt9b, Sox8, Kif26b, Nphs2, Lif, Fras1, Itga8, Sall1
380	GO:0030148	BP	sphingolipid biosynthetic process	0.03589477630885808	16	Smpd1, Sgms2, Elovl6, Sptlc3, St3gal3, Sptssa, Vapa, Sphk1, LOC498300, RGD1564463, Gal3st1, Sptlc1, Elovl2, St8sia5, Fa2h, Pnpla1
381	GO:0034308	BP	primary alcohol metabolic process	0.043494194700171684	16	Gde1, Lipe, Aldh3b1, Pnlip, Lrat, Bmp2, H6pd, Aldh1b1, Plb1, Gpd1, Rbp2, Cyp11a1, Kcnma1, Akr1c2, Akr1c3, Akr1c1
382	GO:0051341	BP	regulation of oxidoreductase activity	0.043494194700171684	16	Apoe, Prdx5, Dhfr, Alox5, Lep, Edn3, Edn2, Agtr2, Vdr, Fdx1, Gch1, Ptk2b, Hp, Mt3, Scarb1, Fcer2
383	GO:0009063	BP	cellular amino acid catabolic process	0.04677133902104581	16	Asrgl1, Bcat1, Padi3, Iffo2, Otc, Dlst, Amdhd1, Pipox, Afmid, Kmo, Hgd, Mat1a, Aadat, Cbs, Hpd, Sdsl
384	GO:0140353	BP	lipid export from cell	0.0017779479212041325	15	Kcnq1, P2ry2, Gal, Lep, Agtr2, Pomc, Tspo, Crhr1, Gdf9, Ptgs2, Tnfrsf11a, Spp1, Igfbp3, Abcc4, Inhba
385	GO:0032370	BP	positive regulation of lipid transport	0.01618681301132941	15	Apoe, P2ry2, Gal, Lrat, Abcb1b, Lpcat3, Apoa1, Anxa2, Erfe, Acsl6, Tnfrsf11a, Atp8a1, Spp1, Acsl1, Lipg
386	GO:0060042	BP	retina morphogenesis in camera-type eye	0.017646283972065673	15	Trpm1, Gnat2, Hcn1, Tspan12, Crb2, Bhlhe23, Casz1, Mfsd2a, Dio3, Megf11, Thy1, Ihh, Sox8, Crb1, Ccdc66
387	GO:0007566	BP	embryo implantation	0.019289109955716383	15	Nlrp5, Tead4, Pzp, Timp1, Sostdc1, Mmp12, Ooep, Vegfa, Serpine2, Vmp1, Stc2, Ptgs2, Lif, Plau, Cdh1
388	GO:0045576	BP	mast cell activation	0.019289109955716383	15	Ptpre, Enpp3, Cftr, Rasgrp1, Ptgds, Gata1, Chga, Thy1, Plscr1, Crhr1, Cd300a, Havcr1, Kit, Cd226, Serpine1
389	GO:0072078	BP	nephron tubule morphogenesis	0.023105555157842524	15	Irx2, Wnt11, Tgfb1, Cd44, Bmp2, Eya1, Agtr2, Six4, Vegfa, Wnt6, Wnt9b, Sox8, Kif26b, Fgf1, Sall1
390	GO:0015918	BP	sterol transport	0.03358598129441687	15	Apoc1, Apoe, Pnlip, Syt7, Cftr, Lep, Abcb1b, Lpcat3, Apoa1, Anxa2, Rab11a, Vapa, Star, Lipg, Scarb1
391	GO:0046364	BP	monosaccharide biosynthetic process	0.038360441766728696	15	Foxo1, Lep, Sord, Obp2a, C1qtnf12, G6pd, Pgk1, Ppara, Gpd1, Erfe, Atf3, Ppargc1a, Pgam2, Slc39a14, Gpt2
392	GO:0003407	BP	neural retina development	0.04349454620792756	15	Trpm1, Gnat2, Hcn1, Tspan12, Crb2, Bhlhe23, Casz1, Atp2b3, Dio3, Megf11, Thy1, Ihh, Sox8, Crb1, Ccdc66
393	GO:0030728	BP	ovulation	4.091935952441814e-5	14	Hsd3b1, Lep, Edn2, Immp2l, Mmp19, Pgr, Inhbb, Ptgs2, Ereg, Plau, Inhba, Cbr1, Adamts1, Plat
394	GO:0032354	BP	response to follicle-stimulating hormone	4.091935952441814e-5	14	Hsd3b1, Asns, Gata1, Fshr, Id2, Pgr, Cyp11a1, Ppargc1a, Epha5, Akr1c3, Inhba, Star, Plat, Serpine1
395	GO:2000378	BP	negative regulation of reactive oxygen species metabolic process	0.0024089239427047366	14	Bnip3, Hk2, Tigar, G6pd, Mycn, Esr2, Ppara, Acp5, Mmp3, Plin5, Hspd1, Brca1, Hp, Mt3
396	GO:0016126	BP	sterol biosynthetic process	0.003941006371516876	14	Apoe, Dhcr7, Cyb5r2, Cftr, Lpcat3, Dhcr24, G6pd, Sqle, Apoa1, Hsd17b7, Idi1, Msmo1, Fgf1, Mvd
397	GO:0046470	BP	phosphatidylcholine metabolic process	0.00779945097082024	14	Apoc1, Pnliprp2, Rab38, Hsd3b1, Lpcat3, Mfsd2a, Phka1, Plb1, Apoa1, Acsl3, Plaat1, Lpcat2, Scarb1, Pla2g1b
398	GO:0048662	BP	negative regulation of smooth muscle cell proliferation	0.010206383226035847	14	Apoe, Ptgir, Bmp2, Ace2, Esr2, Vipr2, Tafa5, Trib1, Igfbp5, Myocd, Rgs5, Ppargc1a, Igfbp3, Cdkn1a
399	GO:0046503	BP	glycerolipid catabolic process	0.012475381751512565	14	Apoc1, Pnliprp2, Lipe, Mgll, Plb1, Gpihbp1, Apoa1, Abhd5, Plin5, Cps1, Lpl, Lipg, Pnpla1, Scarb1
400	GO:0006801	BP	superoxide metabolic process	0.01353263021536555	14	Tgfb1, F2rl1, Dhfr, Duox1, Immp2l, Acp5, Noxo1, Sh3pxd2b, Sod3, Gch1, Fancc, App, Mt3, Cbs
401	GO:0030301	BP	cholesterol transport	0.01618681301132941	14	Apoc1, Apoe, Pnlip, Syt7, Cftr, Lep, Abcb1b, Lpcat3, Apoa1, Anxa2, Rab11a, Star, Lipg, Scarb1
402	GO:0060675	BP	ureteric bud morphogenesis	0.01975484683540109	14	Wnt11, Tgfb1, Cd44, Bmp2, Eya1, Agtr2, Six4, Vegfa, Wnt6, Wnt9b, Sox8, Kif26b, Fgf1, Sall1
403	GO:0031638	BP	zymogen activation	0.021508167139049062	14	Klk7, Perp, Nlrp6, Dhcr24, Pgk1, Lgmn, Anxa2, Ctsh, Serpine2, Plau, Plat, Hp, Ggt1, Serpine1
404	GO:0072171	BP	mesonephric tubule morphogenesis	0.021508167139049062	14	Wnt11, Tgfb1, Cd44, Bmp2, Eya1, Agtr2, Six4, Vegfa, Wnt6, Wnt9b, Sox8, Kif26b, Fgf1, Sall1
405	GO:0045669	BP	positive regulation of osteoblast differentiation	0.02356906010250702	14	Scube2, Sfrp2, Bmpr1b, Bmp2, Cebpb, Cthrc1, Wnt10b, Ltf, Vegfa, Runx2, Msx2, Tp63, Gdf10, Tmem119
406	GO:0035094	BP	response to nicotine	0.025625722438167534	14	Kcnq1, Chrna7, Homer1, Dhfr, Tacr1, Ppara, Chrnb4, Gsta4, Chrna3, Gpx1, Chrna5, Chrnb1, Star, Serpine1
407	GO:0050810	BP	regulation of steroid biosynthetic process	0.03792205125066838	14	Apoe, Dhcr7, Hsd3b5, Lep, Lpcat3, Bmp2, H6pd, Nr0b1, Tspo, Dhh, Ppargc1a, Akr1c3, Star, Fgf1
408	GO:0019319	BP	hexose biosynthetic process	0.04677133902104581	14	Foxo1, Lep, Sord, Obp2a, C1qtnf12, Pgk1, Ppara, Gpd1, Erfe, Atf3, Ppargc1a, Pgam2, Slc39a14, Gpt2
409	GO:0032729	BP	positive regulation of interferon-gamma production	0.04958912971929985	14	Il27, Pde4d, F2rl1, Il23r, Il12rb2, Klrk1, Rasgrp1, Cd3e, Tlr9, Hspd1, Slamf1, Txk, App, Cd226
410	GO:0033627	BP	cell adhesion mediated by integrin	0.04958912971929985	14	Cib1, Itgad, Itga10, Sfrp2, Fermt1, Epha2, Ccn3, Cd3e, Itgae, Skap1, Lif, Plau, Itga8, Serpine1
411	GO:0035418	BP	protein localization to synapse	0.04958912971929985	14	Nphs1, Dlg2, Homer1, Pclo, Clstn3, Snap25, Map1a, Bsn, Rab11a, Dlgap1, Grin2c, Kalrn, Camk2a, Hspb1
412	GO:0046530	BP	photoreceptor cell differentiation	0.04958912971929985	14	Trpm1, Gnat2, Hcn1, Crb2, Bhlhe23, Casz1, Mfsd2a, Dio3, Thy1, Vegfa, Ihh, Sox8, Crb1, Ccdc66
413	GO:1901606	BP	alpha-amino acid catabolic process	0.04958912971929985	14	Asrgl1, Padi3, Iffo2, Otc, Dlst, Pipox, Afmid, Kmo, Hgd, Mat1a, Aadat, Cbs, Hpd, Sdsl
414	GO:0071372	BP	cellular response to follicle-stimulating hormone stimulus	2.79750515093666e-5	13	Hsd3b1, Gata1, Fshr, Id2, Pgr, Cyp11a1, Ppargc1a, Epha5, Akr1c3, Inhba, Star, Plat, Serpine1
415	GO:0071371	BP	cellular response to gonadotropin stimulus	4.596971289875532e-4	13	Hsd3b1, Gata1, Fshr, Id2, Pgr, Cyp11a1, Ppargc1a, Epha5, Akr1c3, Inhba, Star, Plat, Serpine1
416	GO:2000649	BP	regulation of sodium ion transmembrane transporter activity	0.006290651695360272	13	Kcnq1, Fxyd5, Fxyd7, Glrx, Stom, Ptpn3, Fgf13, Wnk3, Scn3b, Slc9a3r1, Wnk2, Hecw1, Neto1
417	GO:0034331	BP	cell junction maintenance	0.007252808374983631	13	Plekha7, Dlg2, F2rl1, Pclo, Mtss1, Cadm1, Bsn, Dlgap1, Rims1, Rab3a, Erc2, Cbln1, Kifc3
418	GO:0030199	BP	collagen fibril organization	0.010932352750208854	13	Loxl4, Sfrp2, Chadl, Scx, Loxl1, Anxa2, Loxl2, Mkx, Comp, Lox, Adamts14, Col13a1, Mmp11
419	GO:0001754	BP	eye photoreceptor cell differentiation	0.013283077793951005	13	Trpm1, Gnat2, Hcn1, Crb2, Bhlhe23, Casz1, Dio3, Thy1, Vegfa, Ihh, Sox8, Crb1, Ccdc66
420	GO:0046850	BP	regulation of bone remodeling	0.01618681301132941	13	Hamp, Syt7, S1pr1, Car2, Pdk4, Lep, Fshr, Tnfrsf11b, Ubash3b, Vegfa, Tnfrsf11a, Spp1, Tmem119
421	GO:1902305	BP	regulation of sodium ion transmembrane transport	0.017839074720634705	13	Kcnq1, Fxyd5, Fxyd7, Glrx, Stom, Ptpn3, Fgf13, Wnk3, Scn3b, Slc9a3r1, Wnk2, Hecw1, Neto1
422	GO:0002931	BP	response to ischemia	0.03388526134742636	13	Cib1, Rnls, Glrx, Hk2, Tigar, Panx2, Hspd1, Ppargc1a, Rcan1, Camk2a, Hk1, Hspa1a, Hspb1
423	GO:0071549	BP	cellular response to dexamethasone stimulus	0.036214232310461385	13	Tgfb1, Foxo1, Hsd3b1, Ass1, Trim63, Agtr2, Hmbs, Vegfa, Igfals, Serpinf1, Star, Plat, Serpine1
424	GO:0006749	BP	glutathione metabolic process	0.03949119434193825	13	Ethe1, Gsto2, Gstm7, Gss, Chac1, G6pd, Gsta4, Gpx1, Idh1, Nfe2l1, Gstt3, Ggt1, Gstt1
425	GO:0019433	BP	triglyceride catabolic process	3.2533381765652194e-4	12	Pnliprp2, Lipe, Mgll, Plb1, Gpihbp1, Apoa1, Abhd5, Plin5, Cps1, Lpl, Lipg, Pnpla1
426	GO:0008207	BP	C21-steroid hormone metabolic process	0.0033067348601798553	12	Hsd3b2, Hsd3b5, Hsd3b3, Hsd3b1, Bmp2, Dhrs9, Cyp11a1, Ppargc1a, Kcnma1, Akr1c2, Akr1c3, Akr1c1
427	GO:0046461	BP	neutral lipid catabolic process	0.0033067348601798553	12	Pnliprp2, Lipe, Mgll, Plb1, Gpihbp1, Apoa1, Abhd5, Plin5, Cps1, Lpl, Lipg, Pnpla1
428	GO:0046464	BP	acylglycerol catabolic process	0.0033067348601798553	12	Pnliprp2, Lipe, Mgll, Plb1, Gpihbp1, Apoa1, Abhd5, Plin5, Cps1, Lpl, Lipg, Pnpla1
429	GO:0010288	BP	response to lead ion	0.00549517125603688	12	Anxa5, Hsd3b2, Hsd3b1, Alas2, Serpina1, Hmbs, Plscr1, Lct, Ptgs2, App, Star, Hp
430	GO:1903524	BP	positive regulation of blood circulation	0.006317373188232286	12	Kcnq1, Chrna7, Dusp5, Pde4d, Edn3, Edn2, Ace2, Chga, Avpr1a, Scn3b, Gch1, Ryr2
431	GO:0006695	BP	cholesterol biosynthetic process	0.01580852312547103	12	Apoe, Dhcr7, Cftr, Lpcat3, Dhcr24, G6pd, Apoa1, Hsd17b7, Idi1, Msmo1, Fgf1, Mvd
432	GO:1902653	BP	secondary alcohol biosynthetic process	0.01580852312547103	12	Apoe, Dhcr7, Cftr, Lpcat3, Dhcr24, G6pd, Apoa1, Hsd17b7, Idi1, Msmo1, Fgf1, Mvd
433	GO:0051353	BP	positive regulation of oxidoreductase activity	0.023965673277790717	12	Apoe, Dhfr, Alox5, Edn3, Edn2, Agtr2, Vdr, Fdx1, Gch1, Ptk2b, Scarb1, Fcer2
434	GO:0098815	BP	modulation of excitatory postsynaptic potential	0.023965673277790717	12	Chrna7, Pclo, Grin2b, Rims1, Grin2c, Ngfr, Ptk2b, App, Neto1, Cbln1, Cux2, Prkar1b
435	GO:0099172	BP	presynapse organization	0.02626510218756725	12	Pclo, Clstn3, Ntng2, Sdcbp, Cadm1, Bsn, Snap91, Pcdh17, Slitrk6, Farp1, App, Cbln1
436	GO:0043470	BP	regulation of carbohydrate catabolic process	0.031795359478621735	12	Pgam1, Tigar, Prkag2, Slc2a6, Ppara, Avpr1a, Gpd1, Hsd11b1, Ppargc1a, Slc4a4, Pfkfb3, App
437	GO:1901607	BP	alpha-amino acid biosynthetic process	0.03456451827028712	12	Psat1, Dhfr, Bhmt, Asns, Bcat1, Ass1, Mtap, Otc, Nags, Cbs, Ggt1, Sdsl
438	GO:0140115	BP	export across plasma membrane	0.037804601465290154	12	Kcnq1, Hamp, Atp4a, Slc35g1, Atp2b3, Slc24a4, Slc47a2, Slc4a4, Atp12a, Abcc4, Slc17a3, Atp4b
439	GO:0001658	BP	branching involved in ureteric bud morphogenesis	0.04112196790107385	12	Tgfb1, Cd44, Bmp2, Eya1, Agtr2, Six4, Vegfa, Wnt6, Wnt9b, Sox8, Fgf1, Sall1
440	GO:0097006	BP	regulation of plasma lipoprotein particle levels	0.04112196790107385	12	Apoc1, Apoe, Lpcat3, Mfsd2a, Soat2, Gpihbp1, Apoa1, Anxa2, Acsl3, Lpl, Lipg, Scarb1
441	GO:0019098	BP	reproductive behavior	0.04366825320333039	12	P2ry2, Hcn1, Tacr1, Oprk1, Npas3, Avpr1a, Pgr, Cyp11a1, Serpine2, Kalrn, App, Vgf
442	GO:0051148	BP	negative regulation of muscle cell differentiation	0.04366825320333039	12	Sox6, Bmp2, G6pd, Id2, Ppara, Ccn3, Myocd, Ereg, Fgf9, Rcan1, Tmem119, Bhlha15
443	GO:0060389	BP	pathway-restricted SMAD protein phosphorylation	0.048096482682219145	12	Tgfb1, Bmp2, Gdf5, Sdcbp, Bmp15, Amh, Amhr2, Inha, Gdf9, Inhbb, Inhba, Gdf10
444	GO:0097186	BP	amelogenesis	3.508917248624228e-4	11	Tcirg1, Perp, Tgfb1, Relt, Foxo1, Cftr, Csf3r, Slc24a4, Ppara, Fam20a, Msx2
445	GO:0120178	BP	steroid hormone biosynthetic process	0.0030516378026054056	11	Dhcr7, Hsd3b2, Hsd3b1, Bmp2, Cyp11a1, Hsd17b1, Hsd17b7, Ppargc1a, Star, Hsd17b2, Scarb1
446	GO:0060219	BP	camera-type eye photoreceptor cell differentiation	0.003626678871167954	11	Trpm1, Gnat2, Hcn1, Crb2, Bhlhe23, Casz1, Dio3, Thy1, Ihh, Sox8, Ccdc66
447	GO:0006739	BP	NADP metabolic process	0.005284916808942526	11	Prdx5, Pgam1, Tigar, Aldh1l1, H6pd, G6pd, Fdx1, Idh1, Fdxr, Hsd11b1, Fmo1
448	GO:0030325	BP	adrenal gland development	0.006211727489435329	11	Wnt11, Cdkn1c, Hsd3b1, Nr0b1, Hmga2, Tspo, Fstl3, Apoa1, Fdx1, Crhr1, Sall1
449	GO:0071825	BP	protein-lipid complex subunit organization	0.0073271010642285	11	Apoc1, Apoe, Lpcat3, Sh3gl2, Mfsd2a, Soat2, Apoa1, Acsl3, Lpl, Lipg, Scarb1
450	GO:0045823	BP	positive regulation of heart contraction	0.01025204380744121	11	Kcnq1, Chrna7, Pde4d, Edn3, Edn2, Ace2, Chga, Avpr1a, Scn3b, Gch1, Ryr2
451	GO:0071398	BP	cellular response to fatty acid	0.020763644282509697	11	Kcnk4, Pdk4, Ass1, Cps1, Nme1, Ppargc1a, Akr1c2, Akr1c3, Akr1c1, Lpl, Hspb1
452	GO:0099054	BP	presynapse assembly	0.023467413154902923	11	Pclo, Clstn3, Ntng2, Sdcbp, Cadm1, Bsn, Pcdh17, Slitrk6, Farp1, App, Cbln1
453	GO:0006636	BP	unsaturated fatty acid biosynthetic process	0.025910261123900668	11	LOC681458, Scd, Fads2, Elovl6, Ptgds, Edn2, Avpr1a, Sphk1, Alox15, Ptgs2, Elovl2
454	GO:0045124	BP	regulation of bone resorption	0.025910261123900668	11	Hamp, S1pr1, Car2, Pdk4, Fshr, Tnfrsf11b, Ubash3b, Vegfa, Tnfrsf11a, Spp1, Tmem119
455	GO:0007588	BP	excretion	0.028750818505959265	11	Anpep, Nphs1, Slc22a6, Tacr1, Agtr2, Avpr1a, Pgr, Chrnb4, Chrna3, Slc9a3r1, Kcnma1
456	GO:0032330	BP	regulation of chondrocyte differentiation	0.028750818505959265	11	Sox6, Sox5, Gdf5, Chadl, Runx2, Wnt9a, Fgf18, Loxl2, Mkx, Maf, Rflna
457	GO:0045599	BP	negative regulation of fat cell differentiation	0.049461594159732496	11	Arntl, Tgfb1, Foxo1, Trib3, Trib2, Wnt10b, Rora, Vegfa, Mkx, Msx2, Mmp11
458	GO:0048710	BP	regulation of astrocyte differentiation	0.005741207551258748	10	Clcf1, Bmp2, Dab1, Id2, Mycn, Hmga2, Serpine2, Epha4, Gpr37l1, Lif
459	GO:0019432	BP	triglyceride biosynthetic process	0.011738805493290446	10	Lpin3, Gpat2, Mfsd2a, Plin5, Mogat1, Acsl6, Gpat3, Acsl1, Lpl, Scarb1
460	GO:0071827	BP	plasma lipoprotein particle organization	0.011738805493290446	10	Apoc1, Apoe, Lpcat3, Mfsd2a, Soat2, Apoa1, Acsl3, Lpl, Lipg, Scarb1
461	GO:0006730	BP	one-carbon metabolic process	0.01311213077150823	10	Ca13, Dhfr, Ca3, Ca14, Car2, Mthfd2, Aldh1l1, Ca5b, Sfxn1, Mat1a
462	GO:0009066	BP	aspartate family amino acid metabolic process	0.01311213077150823	10	Asrgl1, Bhmt, Asns, Ass1, Mtap, Dlst, Pipox, Mat1a, Aadat, Sdsl
463	GO:0055090	BP	acylglycerol homeostasis	0.01311213077150823	10	Apoc4, Apoe, Mia2, Angptl4, Gpihbp1, Apoa1, Angptl8, Rora, Lpl, Scarb1
464	GO:0070328	BP	triglyceride homeostasis	0.01311213077150823	10	Apoc4, Apoe, Mia2, Angptl4, Gpihbp1, Apoa1, Angptl8, Rora, Lpl, Scarb1
465	GO:2000463	BP	positive regulation of excitatory postsynaptic potential	0.01501092640490622	10	Chrna7, Grin2b, Rims1, Grin2c, Ngfr, Ptk2b, App, Neto1, Cux2, Prkar1b
466	GO:0046460	BP	neutral lipid biosynthetic process	0.0311732922044848	10	Lpin3, Gpat2, Mfsd2a, Plin5, Mogat1, Acsl6, Gpat3, Acsl1, Lpl, Scarb1
467	GO:0046463	BP	acylglycerol biosynthetic process	0.0311732922044848	10	Lpin3, Gpat2, Mfsd2a, Plin5, Mogat1, Acsl6, Gpat3, Acsl1, Lpl, Scarb1
468	GO:0051412	BP	response to corticosterone	0.0311732922044848	10	Fosl1, Hsd3b2, Hsd3b5, Hsd3b3, Hsd3b1, Grin2b, Avpr1a, Cyp11a1, Star, Cdkn1a
469	GO:0003382	BP	epithelial cell morphogenesis	0.03451240184527416	10	Dact2, Clic4, Pof1b, Ccdc88c, Bcl11b, Ihh, Pecam1, Cdh1, Col18a1, Notch4
470	GO:0042462	BP	eye photoreceptor cell development	0.03451240184527416	10	Trpm1, Gnat2, Hcn1, Crb2, Bhlhe23, Dio3, Thy1, Vegfa, Crb1, Ccdc66
471	GO:1990776	BP	response to angiotensin	0.03451240184527416	10	Car2, Agtr2, Cdc6, Ptgs2, Myh7, Actn2, Camk2a, Serpine1, Hspb1, Kl
472	GO:0006110	BP	regulation of glycolytic process	0.04185735783459577	10	Pgam1, Tigar, Prkag2, Slc2a6, Ppara, Gpd1, Ppargc1a, Slc4a4, Pfkfb3, App
473	GO:0035902	BP	response to immobilization stress	0.04185735783459577	10	Ptpn5, Lrp11, Tgfb1, Gal, Reg1a, Nr0b1, Pomc, Ucn2, Crhr1, Ptk2b
474	GO:0010862	BP	positive regulation of pathway-restricted SMAD protein phosphorylation	0.04616425994059393	10	Tgfb1, Bmp2, Gdf5, Sdcbp, Bmp15, Inha, Gdf9, Inhbb, Inhba, Gdf10
475	GO:0042181	BP	ketone biosynthetic process	0.04616425994059393	10	Hsd3b1, Bmp2, H6pd, Cyp11a1, Coq10b, Fdxr, Hsd17b1, Ppargc1a, Akr1c3, Star
476	GO:0045933	BP	positive regulation of muscle contraction	0.04616425994059393	10	Kcnq1, Tacr1, Adra2b, Edn2, Ace2, Chga, Sphk1, Myocd, Ptgs2, Kit
477	GO:0051156	BP	glucose 6-phosphate metabolic process	0.0013654682204757163	9	Pgam1, Hk2, Tigar, H6pd, G6pd, Nfe2l1, Hsd11b1, Hk1, Hkdc1
478	GO:0007271	BP	synaptic transmission, cholinergic	0.010932352750208854	9	Chrna7, Ric3, Anxa9, Tacr1, Chrnb4, Chrna3, Chrna5, Chrnb1, Ngfr
479	GO:0010460	BP	positive regulation of heart rate	0.010932352750208854	9	Kcnq1, Chrna7, Pde4d, Edn3, Edn2, Avpr1a, Scn3b, Gch1, Ryr2
480	GO:0099558	BP	maintenance of synapse structure	0.012765703196602213	9	Dlg2, Pclo, Cadm1, Bsn, Dlgap1, Rims1, Rab3a, Erc2, Cbln1
481	GO:0000038	BP	very long-chain fatty acid metabolic process	0.01672702248265416	9	Fads2, Elovl6, Acot4, Acot2, Acot1, Acsbg1, Acsl6, Elovl2, Acsl1
482	GO:0034505	BP	tooth mineralization	0.01672702248265416	9	Tcirg1, Tgfb1, Foxo1, Cftr, Ppara, Wnt6, Fam20a, Msx2, Tspear
483	GO:0006910	BP	phagocytosis, recognition	0.02562792115902478	9	Mfge8, Tub, Ptx3, Adgrb1, C4bpb, Masp1, Sftpd, Megf10, Scarb1
484	GO:0043368	BP	positive T cell selection	0.02562792115902478	9	Themis, Tox, Bcl11b, Cd3d, Cd3e, Cd3g, Zap70, Ly9, Tnfsf18
485	GO:0042398	BP	cellular modified amino acid biosynthetic process	0.04112196790107385	9	Ckm, Dhfr, Aldh1l1, Gss, Bbox1, Gamt, Plscr1, Gch1, Ggt1
486	GO:0050892	BP	intestinal absorption	0.04112196790107385	9	Kcnq1, Hamp, Pnlip, Lep, Lpcat3, Vdr, Apoa1, Gcnt3, Scarb1
487	GO:0110110	BP	positive regulation of animal organ morphogenesis	0.04112196790107385	9	Wnt11, Tgfb1, Fgf3, Bmp2, Gata5, Six4, Sox8, Ngfr, Fgf1
488	GO:0048010	BP	vascular endothelial growth factor receptor signaling pathway	0.0455484658355927	9	Cadm4, Vegfa, Fgf18, Ptk2b, Fgf9, Bcar1, Mt3, Hspb1, Flt1
489	GO:0001990	BP	regulation of systemic arterial blood pressure by hormone	0.04997674633551993	9	F2rl1, Tacr1, Edn3, Edn2, Atp6ap2, G6pd, Agtr2, Ace2, Avpr1a
490	GO:1901381	BP	positive regulation of potassium ion transmembrane transport	0.04997674633551993	9	Kcnq1, Gal, Dpp6, Edn3, Oprk1, Wnk3, Akap6, Actn2, Wnk2
491	GO:0071871	BP	response to epinephrine	0.002603682991665499	8	Kcnq1, Rnls, Pde4d, Akap6, Fdx1, Ppargc1a, Ryr2, Star
492	GO:0045056	BP	transcytosis	0.0091064723775011	8	Mfsd2a, Fshr, Mal2, Tg, Gpihbp1, Rab11a, Cd300lg, Scarb1
493	GO:0008209	BP	androgen metabolic process	0.016021201158093693	8	Hsd3b2, Dhrs9, Chst10, Hsd17b7, Ppargc1a, Spp1, Hsd17b2, Scarb1
494	GO:0042634	BP	regulation of hair cycle	0.01879086024216917	8	Arntl, Gal, Fermt1, Wnt10b, Ngfr, Msx2, Inhba, Fa2h
495	GO:0035929	BP	steroid hormone secretion	0.02224985204473759	8	Kcnq1, Gal, Agtr2, Pomc, Tspo, Crhr1, Gdf9, Inhba
496	GO:0035767	BP	endothelial cell chemotaxis	0.025625722438167534	8	Smoc2, Sema5a, Lgmn, Ccn3, Vegfa, Fgf18, Fgf1, Hspb1
497	GO:0071711	BP	basement membrane organization	0.025625722438167534	8	Fermt1, Ntng2, Fshr, Ntn4, Lamb3, Phldb2, Col4a1, Mmp11
498	GO:0120255	BP	olefinic compound biosynthetic process	0.025625722438167534	8	Hsd3b1, Bmp2, H6pd, Cyp11a1, Hsd17b1, Ppargc1a, Akr1c3, Star
499	GO:0032770	BP	positive regulation of monooxygenase activity	0.029434711567922843	8	Apoe, Dhfr, Agtr2, Vdr, Gch1, Ptk2b, Scarb1, Fcer2
500	GO:0061036	BP	positive regulation of cartilage development	0.029434711567922843	8	Sox6, Sox5, Bmp2, Gdf5, Scx, Runx2, Fgf18, Loxl2
501	GO:0014912	BP	negative regulation of smooth muscle cell migration	0.03388526134742636	8	Tafa5, Myh9, Trib1, Igfbp5, Myocd, Ppargc1a, Igfbp3, Serpine1
502	GO:0032967	BP	positive regulation of collagen biosynthetic process	0.04317224701106146	8	Tgfb1, Prdx5, Creb3l1, Scx, Ihh, Rgcc, Mkx, Serpine1
503	GO:0046697	BP	decidualization	0.04317224701106146	8	Vdr, Stc2, Ptgs2, Kiss1, Lif, Sfrp4, Cdh1, Serpine1
504	GO:0018158	BP	protein oxidation	0.0015784536414162147	7	Loxl4, Prdx3, Loxl1, Apoa1, Gpx1, Loxl2, Lox
505	GO:0032276	BP	regulation of gonadotropin secretion	0.0033043959883585655	7	Lep, Oprk1, Ucn2, Inha, Inhbb, Kiss1, Inhba
506	GO:0032274	BP	gonadotropin secretion	0.013337481868848254	7	Lep, Oprk1, Ucn2, Inha, Inhbb, Kiss1, Inhba
507	GO:0042448	BP	progesterone metabolic process	0.01618681301132941	7	Hsd3b5, Hsd3b1, Dhrs9, Ppargc1a, Akr1c2, Akr1c3, Akr1c1
508	GO:0051000	BP	positive regulation of nitric-oxide synthase activity	0.01618681301132941	7	Apoe, Dhfr, Agtr2, Gch1, Ptk2b, Scarb1, Fcer2
509	GO:0070166	BP	enamel mineralization	0.01618681301132941	7	Tcirg1, Tgfb1, Foxo1, Cftr, Ppara, Fam20a, Msx2
510	GO:0042759	BP	long-chain fatty acid biosynthetic process	0.01975484683540109	7	Gstm7, Elovl6, Alox5, Acot7, Acsbg1, Ltc4s, Alox15
511	GO:2001026	BP	regulation of endothelial cell chemotaxis	0.01975484683540109	7	Smoc2, Sema5a, Lgmn, Vegfa, Fgf18, Fgf1, Hspb1
512	GO:0071498	BP	cellular response to fluid shear stress	0.023965673277790717	7	Car2, Ass1, Mtss1, Ptgs2, Spp1, Ptk2b, Plau
513	GO:0042219	BP	cellular modified amino acid catabolic process	0.028198144339763545	7	Bhmt, Pcyox1, Aldh1l1, Chac1, Dio3, Dio2, Ggt1
514	GO:0065005	BP	protein-lipid complex assembly	0.028198144339763545	7	Apoe, Lpcat3, Sh3gl2, Mfsd2a, Soat2, Apoa1, Acsl3
515	GO:0008211	BP	glucocorticoid metabolic process	0.03321760942565801	7	Gal, Bmp2, H6pd, Apoa1, Cyp11a1, Hsd11b1, Star
516	GO:0060055	BP	angiogenesis involved in wound healing	0.03321760942565801	7	Gpr4, Smoc2, Alox5, Tafa5, Gpx1, Vegfa, Serpine1
517	GO:0031639	BP	plasminogen activation	0.038360441766728696	7	Dhcr24, Pgk1, Anxa2, Serpine2, Plau, Plat, Serpine1
518	GO:0006706	BP	steroid catabolic process	0.04366825320333039	7	Apoe, Hsd11b1, Spp1, Akr1c3, Cbr1, Mt3, Scarb1
519	GO:0042744	BP	hydrogen peroxide catabolic process	0.04366825320333039	7	Prdx5, Prdx3, Duox1, Gpx1, Hba-a3, Hp, Mt3
520	GO:0034311	BP	diol metabolic process	0.04997674633551993	7	Dhfr, Plpp1, Sptlc3, Sptssa, Sphk1, Gch1, Sptlc1
521	GO:0060444	BP	branching involved in mammary gland duct morphogenesis	0.04997674633551993	7	Tgfb1, Epha2, Vdr, Pgr, Etv4, Areg, Msx2
522	GO:0035095	BP	behavioral response to nicotine	0.0015784536414162147	6	Chrna7, Ppara, Chrnb4, Chrna3, Chrna5, Chrnb1
523	GO:1990709	BP	presynaptic active zone organization	0.0026764371218273345	6	Pclo, Bsn, Rims1, Pcdh17, Rab3a, Erc2
524	GO:0009068	BP	aspartate family amino acid catabolic process	0.008604443102822172	6	Asrgl1, Dlst, Pipox, Mat1a, Aadat, Sdsl
525	GO:0071872	BP	cellular response to epinephrine stimulus	0.008604443102822172	6	Kcnq1, Pde4d, Akap6, Fdx1, Ryr2, Star
526	GO:0001542	BP	ovulation from ovarian follicle	0.012008219392087422	6	Lep, Edn2, Mmp19, Pgr, Cbr1, Adamts1
527	GO:0010889	BP	regulation of sequestering of triglyceride	0.012008219392087422	6	Apoc4, Plin2, Ppara, Abhd5, Plin5, Lpl
528	GO:0033690	BP	positive regulation of osteoblast proliferation	0.012008219392087422	6	Bmp2, Gata1, Cthrc1, Ltf, Sox8, Tmem119
529	GO:0090136	BP	epithelial cell-cell adhesion	0.01521240290457699	6	Plekha7, Ccn3, Ihh, Kit, Kifc3, Ctnna3
530	GO:2001028	BP	positive regulation of endothelial cell chemotaxis	0.01521240290457699	6	Smoc2, Sema5a, Lgmn, Vegfa, Fgf18, Hspb1
531	GO:0006740	BP	NADPH regeneration	0.019289109955716383	6	Pgam1, Tigar, Aldh1l1, H6pd, G6pd, Hsd11b1
532	GO:0045651	BP	positive regulation of macrophage differentiation	0.019289109955716383	6	Tgfb1, Id2, Trib1, Lif, Pf4, Il34
533	GO:0030730	BP	sequestering of triglyceride	0.024008873408356547	6	Apoc4, Plin2, Ppara, Abhd5, Plin5, Lpl
534	GO:0033591	BP	response to L-ascorbic acid	0.024008873408356547	6	Hsd3b1, Lep, Acp5, Cyp11a1, Runx2, Hp
535	GO:0042670	BP	retinal cone cell differentiation	0.024008873408356547	6	Gnat2, Hcn1, Crb2, Casz1, Dio3, Thy1
536	GO:0033327	BP	Leydig cell differentiation	0.029434711567922843	6	Hsd3b2, Hsd3b1, Nr0b1, Amh, Dhh, Cyp11a1
537	GO:0045779	BP	negative regulation of bone resorption	0.029434711567922843	6	Hamp, Fshr, Tnfrsf11b, Ubash3b, Vegfa, Tmem119
538	GO:0051797	BP	regulation of hair follicle development	0.035326991559641654	6	Gal, Fermt1, Wnt10b, Ngfr, Msx2, Inhba
539	GO:0032332	BP	positive regulation of chondrocyte differentiation	0.04185735783459577	6	Sox6, Sox5, Gdf5, Runx2, Fgf18, Loxl2
540	GO:0034377	BP	plasma lipoprotein particle assembly	0.04185735783459577	6	Apoe, Lpcat3, Mfsd2a, Soat2, Apoa1, Acsl3
541	GO:0035313	BP	wound healing, spreading of epidermal cells	0.04185735783459577	6	Fermt1, Plet1, Mmp12, Msx2, Phldb2, Hbegf
542	GO:0046851	BP	negative regulation of bone remodeling	0.04185735783459577	6	Hamp, Fshr, Tnfrsf11b, Ubash3b, Vegfa, Tmem119
543	GO:0098962	BP	regulation of postsynaptic neurotransmitter receptor activity	0.04185735783459577	6	Cnih2, Homer1, Dlgap1, Shisa9, Cacng4, App
544	GO:0001696	BP	gastric acid secretion	0.049461594159732496	6	Sct, Kcnq1, Atp4a, Snx10, Slc26a7, Gpr39
545	GO:0034312	BP	diol biosynthetic process	0.049461594159732496	6	Dhfr, Sptlc3, Sptssa, Sphk1, Gch1, Sptlc1
546	GO:0035930	BP	corticosteroid hormone secretion	0.049461594159732496	6	Kcnq1, Gal, Agtr2, Pomc, Tspo, Crhr1
547	GO:0043117	BP	positive regulation of vascular permeability	0.049461594159732496	6	Apoe, Tgfb1, Tacr1, Vegfa, Cxcr2, Flt1
548	GO:0048875	BP	chemical homeostasis within a tissue	0.049461594159732496	6	Tgfb1, Homer1, Ctsh, Vegfa, Nkiras1, Sftpd
549	GO:0060314	BP	regulation of ryanodine-sensitive calcium-release channel activity	0.049461594159732496	6	Trdn, Pde4d, Gstm7, Sri, Fkbp1a, Akap6
550	GO:2001014	BP	regulation of skeletal muscle cell differentiation	0.049461594159732496	6	Arntl, Klhl41, Six4, Ephb1, Gpc1, Myocd
551	GO:0046880	BP	regulation of follicle-stimulating hormone secretion	0.010959645983532029	5	Lep, Ucn2, Inha, Inhbb, Inhba
552	GO:0150172	BP	regulation of phosphatidylcholine metabolic process	0.010959645983532029	5	Apoc1, Rab38, Mfsd2a, Acsl3, Scarb1
553	GO:0022605	BP	mammalian oogenesis stage	0.015265953380039953	5	Bmpr1b, Ptx3, Amh, Gdf9, Ereg
554	GO:0044848	BP	biological phase	0.015265953380039953	5	Gal, Fermt1, Wnt10b, Inhbb, Msx2
555	GO:0046884	BP	follicle-stimulating hormone secretion	0.020763644282509697	5	Lep, Ucn2, Inha, Inhbb, Inhba
556	GO:0061370	BP	testosterone biosynthetic process	0.020763644282509697	5	Hsd3b1, Cyp11a1, Hsd17b1, Akr1c3, Star
557	GO:0048711	BP	positive regulation of astrocyte differentiation	0.027357549859359575	5	Clcf1, Bmp2, Id2, Serpine2, Lif
558	GO:0006098	BP	pentose-phosphate shunt	0.03466731250201175	5	Pgam1, Tigar, H6pd, G6pd, Hsd11b1
559	GO:0042487	BP	regulation of odontogenesis of dentin-containing tooth	0.03466731250201175	5	Bmp2, Tnfrsf11b, Runx2, Wnt10a, Ngfr
560	GO:0035933	BP	glucocorticoid secretion	0.04317224701106146	5	Kcnq1, Gal, Pomc, Tspo, Crhr1
561	GO:0060073	BP	micturition	0.04317224701106146	5	Tacr1, Pgr, Chrnb4, Chrna3, Kcnma1
562	GO:0032277	BP	negative regulation of gonadotropin secretion	0.049461594159732496	4	Oprk1, Ucn2, Inha, Inhbb
563	GO:0061043	BP	regulation of vascular wound healing	0.049461594159732496	4	Smoc2, Alox5, Tafa5, Serpine1
564	GO:0071373	BP	cellular response to luteinizing hormone stimulus	0.049461594159732496	4	Hsd3b1, Pgr, Star, Plat
565	GO:0031012	CC	extracellular matrix	1.9486380535197707e-10	77	Adamtsl3, Fcgbp, Apoe, Wnt11, Smoc2, Tgfb1, Pcsk6, Adamts17, Hapln3, Loxl4, Nphs1, Zp1, Vwa2, Mamdc2, Atrnl1, Frem2, Vcan, Sfrp2, Ptx3, Lrig1, Adamts9, Ntng2, Col20a1, Tnc, Tmeff1, Timp1, Nyx, Egfl6, Chadl, Angptl4, Lingo3, Cthrc1, Ntn4, Mmp19, Ccn3, Tnfrsf11b, Loxl1, Col5a3, Mmp3, Mmp12, Anxa2, Mmp10, Col7a1, Plscr1, Vegfa, Gpc1, Col4a3, Ihh, Serpine2, Wnt6, Igfals, Serpinf1, Lrrn2, Lamb3, Lamc2…
566	GO:0030312	CC	external encapsulating structure	1.9486380535197707e-10	77	Adamtsl3, Fcgbp, Apoe, Wnt11, Smoc2, Tgfb1, Pcsk6, Adamts17, Hapln3, Loxl4, Nphs1, Zp1, Vwa2, Mamdc2, Atrnl1, Frem2, Vcan, Sfrp2, Ptx3, Lrig1, Adamts9, Ntng2, Col20a1, Tnc, Tmeff1, Timp1, Nyx, Egfl6, Chadl, Angptl4, Lingo3, Cthrc1, Ntn4, Mmp19, Ccn3, Tnfrsf11b, Loxl1, Col5a3, Mmp3, Mmp12, Anxa2, Mmp10, Col7a1, Plscr1, Vegfa, Gpc1, Col4a3, Ihh, Serpine2, Wnt6, Igfals, Serpinf1, Lrrn2, Lamb3, Lamc2…
567	GO:0009897	CC	external side of plasma membrane	2.7011240374268146e-4	63	Cd248, Apoe, Anpep, Chrna7, Itgad, Mfge8, Enpp3, Folr1, Gfra1, Cd19, Plppr4, Itga10, S1pr1, Vtcn1, Anxa5, Osmr, Il23r, Il12rb2, Abcb1b, Clec2d2, LOC500331, Klrk1, Cd44, Ly75, Cntfr, Tnfrsf9, Csf3r, Atp6ap2, Sdc1, Serpina5, Gpihbp1, Cd3d, Cd3e, Plet1, Thy1, Cd3g, Ccr9, Cxcr6, Sema7a, Cxcr2, Serpine2, Pecam1, Itgae, Dnai2, Asgr2, Asgr1, Ngfr, Btnl9, Ly9, Slamf1, Tnfrsf11a, Epha5, Kit, Antxr2, Abcc4…
568	GO:0043235	CC	receptor complex	3.522115776892041e-5	62	Arntl, Chrna7, Tgfb1, Itgad, Loxl4, Cnih2, Ahrr, Gfra1, Itga10, Osmr, Bmpr1b, Gpr37, Grm8, Il23r, Il12rb2, Plxna4, Grin2b, Arntl2, Cd44, Bmp2, Lrp1b, Gabrr2, Cntfr, Epha2, Csf3r, Sdcbp, Plxnb3, Fshr, Vdr, Amhr2, Plxnc1, Tnfrsf11b, Grin3b, Cd3d, Cd3e, Gpr62, Cd3g, Chrnb4, Ephb1, Chrna3, Chrna5, Hspd1, Zap70, Epha4, Shisa9, Cacng4, Itgae, Skap1, Grin2c, Chrnb1, Gpr37l1, Epha5, Kit, Ramp3, Ptk2b, It…
569	GO:0098984	CC	neuron to neuron synapse	0.0013111963956361865	60	Chrna7, Bnip3, Adgra1, Syt7, Sorcs3, Cnih2, Psd, Gng3, Neurl1, Dlg2, Plppr4, Homer1, Pdlim5, Dclk1, Syn2, Iqsec3, Ctnna2, Pclo, Clstn3, Grin2b, Rheb, Kcna4, Flrt3, Ncs1, Map1a, Dab1, Sh3gl2, Cnksr2, Scn8a, Baalc, Mal2, Grin3b, Adgrb1, Cadm1, Bsn, Snap91, Chrna3, Dlgap1, Rims1, Epha4, Shisa9, Efnb3, Cacng4, Grin2c, Ngfr, Nefh, Bcl11a, Ptk2b, Actn2, Itga8, Prr7, Kalrn, Gap43, Lzts1, Erc2, Camk2a, N…
570	GO:0097060	CC	synaptic membrane	0.0017047756050800533	60	Ptpn5, Kcnc3, P2ry2, Chrna7, Slc6a5, Syt7, Sorcs3, Cnih2, Fosl1, Dlg2, Plppr4, Grm8, Iqsec3, Ctnna2, Clstn3, Grin2b, Slc6a6, Kcna4, Rims4, Flrt3, Snap25, Ntng2, Gabrr2, Oprk1, Atp2b3, Atp6ap2, Cnksr2, Scn8a, Grin3b, Adgrb1, Cadm1, Bsn, Chrnb4, Snap91, Chrna3, Chrna5, Dlgap1, Rims1, Epha4, Shisa9, Efnb3, Cacng4, Grin2c, Chrnb1, Pdlim4, Pcdh17, Farp1, Kcnma1, Actn2, Itga8, Prr7, Lzts1, Erc2, Camk2a…
571	GO:0016324	CC	apical plasma membrane	7.648773619472763e-5	59	Abcc6, Kcnq1, Cib1, P2ry2, Chrna7, Tcirg1, Enpp3, Atp4a, Folr1, Trpm6, Pde4d, Plpp1, Osmr, F2rl2, Cftr, Slc4a5, Abcb1b, Slc6a6, Cd44, Duox1, Slc23a2, Crb2, Atp6v0d2, Trpa1, Cntfr, Gpr143, Atp6ap2, Slc16a2, Ace2, S100g, Shroom4, Plb1, Slc24a4, Myh9, Anxa13, Gpihbp1, Slc38a3, Plet1, Tlr9, Thy1, Slc6a20a, Slc9a3r1, Havcr1, Cd300lg, Lct, Kcnk2, Kiss1, Atp12a, Abcc4, Slc39a14, Kcnma1, Slc17a3, Atp4b, …
572	GO:0032279	CC	asymmetric synapse	0.0023667004264276395	56	Chrna7, Bnip3, Adgra1, Sorcs3, Cnih2, Psd, Gng3, Neurl1, Dlg2, Plppr4, Homer1, Pdlim5, Dclk1, Syn2, Iqsec3, Ctnna2, Pclo, Clstn3, Grin2b, Rheb, Kcna4, Flrt3, Ncs1, Map1a, Dab1, Cnksr2, Scn8a, Baalc, Grin3b, Adgrb1, Cadm1, Bsn, Snap91, Chrna3, Dlgap1, Rims1, Epha4, Shisa9, Efnb3, Cacng4, Grin2c, Ngfr, Nefh, Bcl11a, Ptk2b, Actn2, Itga8, Prr7, Kalrn, Gap43, Lzts1, Erc2, Camk2a, Neto1, Mt3, Hspb1
573	GO:0099572	CC	postsynaptic specialization	0.007694914926724282	56	Chrna7, Bnip3, Adgra1, Sorcs3, Cnih2, Psd, Gng3, Neurl1, Dlg2, Plppr4, Homer1, Pdlim5, Dclk1, Syn2, Iqsec3, Ctnna2, Pclo, Clstn3, Grin2b, Rheb, Flrt3, Ncs1, Map1a, Dab1, Cnksr2, Scn8a, Baalc, Grin3b, Adgrb1, Cadm1, Bsn, Snap91, Chrna3, Dlgap1, Rims1, Epha4, Shisa9, Efnb3, Cacng4, Grin2c, Chrnb1, Ngfr, Nefh, Bcl11a, Ptk2b, Actn2, Itga8, Prr7, Kalrn, Gap43, Lzts1, Erc2, Camk2a, Neto1, Mt3, Hspb1
574	GO:0030141	CC	secretory granule	0.0015784536414162147	55	Klk13, Pnliprp2, Kcnq1, Klk8, Klk7, Slc6a5, Tcirg1, Tgfb1, Mfge8, Syt7, Nlrp5, Scgb1a1, Gal, Smpd1, Pcsk1, Reg1a, Sri, Snx10, Chgb, Eppin, Pdyn, Ncs1, Pomc, Serpina5, Chga, Myh9, Atp8b3, Fstl3, Loxl1, Ctsh, Ltf, Vegfa, Hspd1, Crisp3, Ica1l, Scg2, Kif1a, Serpine2, Tekt3, Kit, Pf4, Igfbp3, Abcc4, Prss55, Sftpc, Pla1a, Rab3a, Plat, Tff3, Rph3a, Serpine1, Vgf, Tmem184a, Pla2g1b, Brca2
575	GO:0014069	CC	postsynaptic density	0.0026764371218273345	55	Chrna7, Bnip3, Adgra1, Sorcs3, Cnih2, Psd, Gng3, Neurl1, Dlg2, Plppr4, Homer1, Pdlim5, Dclk1, Syn2, Iqsec3, Ctnna2, Pclo, Clstn3, Grin2b, Rheb, Flrt3, Ncs1, Map1a, Dab1, Cnksr2, Scn8a, Baalc, Grin3b, Adgrb1, Cadm1, Bsn, Snap91, Chrna3, Dlgap1, Rims1, Epha4, Shisa9, Efnb3, Cacng4, Grin2c, Ngfr, Nefh, Bcl11a, Ptk2b, Actn2, Itga8, Prr7, Kalrn, Gap43, Lzts1, Erc2, Camk2a, Neto1, Mt3, Hspb1
576	GO:0098857	CC	membrane microdomain	0.012008219392087422	50	Kcnq1, Lipe, Chrna7, Ctsd, Nphs1, Slc22a6, S1pr1, Trpc4, Plpp1, Dysf, Sdc4, Snap25, Stom, Cavin4, Sdcbp, Atp2b3, Pgk1, Prkar2b, Akap6, Vdr, Tuba1c, Baalc, Mal2, Anxa13, Anxa2, Thy1, Plcd1, Plscr1, Ephb1, Chrna3, Hspd1, Gpc1, Zap70, Pecam1, Skap1, Sgca, Slc9a3r1, Ngfr, Ptgs2, Nphs2, Nf2, Ptk2b, Kcnma1, Unc5a, App, Cdh1, Adgrg1, Hk1, Hspa1a, Scarb1
577	GO:0045121	CC	membrane raft	0.01618681301132941	49	Kcnq1, Lipe, Chrna7, Ctsd, Nphs1, Slc22a6, S1pr1, Trpc4, Plpp1, Sdc4, Snap25, Stom, Cavin4, Sdcbp, Atp2b3, Pgk1, Prkar2b, Akap6, Vdr, Tuba1c, Baalc, Mal2, Anxa13, Anxa2, Thy1, Plcd1, Plscr1, Ephb1, Chrna3, Hspd1, Gpc1, Zap70, Pecam1, Skap1, Sgca, Slc9a3r1, Ngfr, Ptgs2, Nphs2, Nf2, Ptk2b, Kcnma1, Unc5a, App, Cdh1, Adgrg1, Hk1, Hspa1a, Scarb1
578	GO:0062023	CC	collagen-containing extracellular matrix	1.3223345544384243e-6	48	Smoc2, Tgfb1, Pcsk6, Loxl4, Nphs1, Zp1, Vwa2, Mamdc2, Atrnl1, Frem2, Vcan, Sfrp2, Ntng2, Col20a1, Tnc, Tmeff1, Timp1, Egfl6, Chadl, Angptl4, Ntn4, Ccn3, Loxl1, Col5a3, Anxa2, Col7a1, Plscr1, Vegfa, Gpc1, Col4a3, Serpine2, Serpinf1, Lamb3, Lamc2, Fras1, Sod3, Fgf9, Loxl2, Omd, Adamts1, Comp, Angpt2, Col4a2, Col4a1, Lox, Podnl1, Col18a1, Serpine1
579	GO:1990351	CC	transporter complex	0.013046872250610523	48	Ttyh1, Kcnc3, Kcnq1, Chrna7, Kcnk4, Cnih2, Trdn, Pde4d, Trpc4, Kcnab1, Hcn1, Trpc3, Cftr, Dpp6, Grin2b, Kcnj8, Kcna4, Snap25, Fkbp1a, Kcnb2, Gabrr2, Clic4, Kcnq4, Ndufs5, Ndufa10l1, Akap6, Scn8a, Grin3b, Scn3b, Chrnb4, Chrna3, Chrna5, Shisa9, Cacng4, Grin2c, Ttyh2, Chrnb1, Kcnk2, Cnga1, Atp8a1, Lrrc8c, Ptk2b, Kcnma1, Ryr2, Clic6, Atp4b, Cacna2d3, Kcng4
580	GO:1902495	CC	transmembrane transporter complex	0.008386834132854931	47	Ttyh1, Kcnc3, Kcnq1, Chrna7, Kcnk4, Cnih2, Trdn, Pde4d, Trpc4, Kcnab1, Hcn1, Trpc3, Cftr, Dpp6, Grin2b, Kcnj8, Kcna4, Snap25, Fkbp1a, Kcnb2, Gabrr2, Clic4, Kcnq4, Ndufs5, Ndufa10l1, Akap6, Scn8a, Grin3b, Scn3b, Chrnb4, Chrna3, Chrna5, Shisa9, Cacng4, Grin2c, Ttyh2, Chrnb1, Kcnk2, Cnga1, Lrrc8c, Ptk2b, Kcnma1, Ryr2, Clic6, Atp4b, Cacna2d3, Kcng4
581	GO:0045211	CC	postsynaptic membrane	0.001234886323459919	46	Kcnc3, Chrna7, Sorcs3, Cnih2, Dlg2, Plppr4, Grm8, Iqsec3, Ctnna2, Clstn3, Grin2b, Slc6a6, Kcna4, Flrt3, Gabrr2, Oprk1, Atp6ap2, Cnksr2, Scn8a, Grin3b, Adgrb1, Cadm1, Chrnb4, Snap91, Chrna3, Chrna5, Dlgap1, Epha4, Shisa9, Efnb3, Cacng4, Grin2c, Chrnb1, Pdlim4, Pcdh17, Farp1, Kcnma1, Actn2, Prr7, Lzts1, Camk2a, Kctd16, Neto1, Cbln1, Rph3a, Hspb1
582	GO:0034702	CC	ion channel complex	4.7159481822757335e-4	44	Ttyh1, Kcnc3, Kcnq1, Chrna7, Kcnk4, Cnih2, Trdn, Pde4d, Trpc4, Kcnab1, Hcn1, Trpc3, Cftr, Dpp6, Grin2b, Kcnj8, Kcna4, Snap25, Fkbp1a, Kcnb2, Gabrr2, Clic4, Kcnq4, Akap6, Scn8a, Grin3b, Scn3b, Chrnb4, Chrna3, Chrna5, Shisa9, Cacng4, Grin2c, Ttyh2, Chrnb1, Kcnk2, Cnga1, Lrrc8c, Ptk2b, Kcnma1, Ryr2, Clic6, Cacna2d3, Kcng4
583	GO:0045178	CC	basal part of cell	0.012480012406805996	41	Abcc6, Kcnq1, P2ry2, Slc22a6, Folr1, Dlg2, Trpc4, Rhbg, Hcn1, Car2, Cftr, Reg1a, Slc4a5, Ctnna2, Slc6a6, Cd44, Slc13a3, Slc23a2, Kcnq4, Cdh17, Slc26a7, S100g, Shroom4, Anxa13, Gpihbp1, Cadm1, Slc38a3, Tlr9, Anxa2, Aqp9, Rasgrf1, Cd300lg, Slc13a5, Slc4a4, Atp12a, Abcc4, Slc39a14, Phldb2, Slc51a, Cdh1, Scarb1
584	GO:0009925	CC	basal plasma membrane	0.010206383226035847	39	Abcc6, Kcnq1, P2ry2, Slc22a6, Folr1, Dlg2, Trpc4, Rhbg, Hcn1, Car2, Cftr, Slc4a5, Ctnna2, Slc6a6, Cd44, Slc13a3, Slc23a2, Kcnq4, Cdh17, Slc26a7, S100g, Shroom4, Anxa13, Gpihbp1, Cadm1, Slc38a3, Tlr9, Anxa2, Aqp9, Rasgrf1, Cd300lg, Slc13a5, Slc4a4, Atp12a, Abcc4, Slc39a14, Slc51a, Cdh1, Scarb1
585	GO:0016323	CC	basolateral plasma membrane	0.005436702900962432	37	Abcc6, Kcnq1, P2ry2, Slc22a6, Folr1, Dlg2, Trpc4, Rhbg, Hcn1, Car2, Cftr, Slc4a5, Ctnna2, Slc6a6, Cd44, Slc13a3, Slc23a2, Cdh17, Slc26a7, S100g, Anxa13, Gpihbp1, Cadm1, Slc38a3, Tlr9, Anxa2, Aqp9, Rasgrf1, Cd300lg, Slc13a5, Slc4a4, Atp12a, Abcc4, Slc39a14, Slc51a, Cdh1, Scarb1
586	GO:0043292	CC	contractile fiber	0.005773627052620245	35	Actn4, Rtn2, Pde4d, Homer1, Pdlim5, Anxa5, Sri, Grin2b, Kcnj8, Neb, Ttn, Sdc4, Klhl41, Fkbp1a, Jph1, Myom3, Trim63, Cavin4, Scn8a, Scn3b, Ky, Sphkap, Pecam1, Tcap, Myh13, Myh1, Actg1, Pdlim4, Ablim2, Myh6, Myh7, Actn2, Ryr2, Kcnn2, Hspb1
587	GO:0030016	CC	myofibril	0.0056547111889745415	34	Actn4, Rtn2, Pde4d, Homer1, Pdlim5, Anxa5, Sri, Grin2b, Kcnj8, Neb, Ttn, Sdc4, Klhl41, Fkbp1a, Jph1, Myom3, Trim63, Cavin4, Scn8a, Scn3b, Ky, Sphkap, Tcap, Myh13, Myh1, Actg1, Pdlim4, Ablim2, Myh6, Myh7, Actn2, Ryr2, Kcnn2, Hspb1
588	GO:0034703	CC	cation channel complex	0.007151545431526482	32	Kcnc3, Kcnq1, Kcnk4, Cnih2, Trdn, Pde4d, Trpc4, Kcnab1, Hcn1, Trpc3, Dpp6, Grin2b, Kcnj8, Kcna4, Snap25, Fkbp1a, Kcnb2, Kcnq4, Akap6, Scn8a, Grin3b, Scn3b, Shisa9, Cacng4, Grin2c, Kcnk2, Cnga1, Ptk2b, Kcnma1, Ryr2, Cacna2d3, Kcng4
589	GO:0043197	CC	dendritic spine	0.012026091256516842	32	Kcnc3, Chrna7, Cnih2, Psd, Neurl1, Homer1, Sri, Grin2b, Kcna4, Espn, Fbxo2, Atp6ap2, Prkar2b, Adgrb1, Cd3e, Pgr, Mob4, Epha4, Shisa9, Sez6, Ngfr, Pdlim4, Ptk2b, Farp1, Itga8, App, Lzts1, Kcnn2, Camk2a, Mt3, Rph3a, Grid2ip
590	GO:0044309	CC	neuron spine	0.014412392576073761	32	Kcnc3, Chrna7, Cnih2, Psd, Neurl1, Homer1, Sri, Grin2b, Kcna4, Espn, Fbxo2, Atp6ap2, Prkar2b, Adgrb1, Cd3e, Pgr, Mob4, Epha4, Shisa9, Sez6, Ngfr, Pdlim4, Ptk2b, Farp1, Itga8, App, Lzts1, Kcnn2, Camk2a, Mt3, Rph3a, Grid2ip
591	GO:0099240	CC	intrinsic component of synaptic membrane	0.03466731250201175	32	Kcnc3, P2ry2, Chrna7, Slc6a5, Syt7, Sorcs3, Cnih2, Dlg2, Plppr4, Grm8, Clstn3, Grin2b, Slc6a6, Kcna4, Flrt3, Snap25, Ntng2, Oprk1, Atp2b3, Scn8a, Grin3b, Adgrb1, Cadm1, Chrna3, Epha4, Shisa9, Efnb3, Cacng4, Chrnb1, Pcdh17, Kcnma1, Neto1
592	GO:0098802	CC	plasma membrane signaling receptor complex	9.216169915497431e-4	31	Chrna7, Tgfb1, Itgad, Cnih2, Itga10, Osmr, Il23r, Grin2b, Bmp2, Cntfr, Sdcbp, Amhr2, Grin3b, Cd3d, Cd3e, Cd3g, Chrnb4, Chrna3, Chrna5, Zap70, Shisa9, Cacng4, Itgae, Skap1, Grin2c, Chrnb1, Ramp3, Ptk2b, Itga8, Trat1, Gpr156
593	GO:0098858	CC	actin-based cell projection	0.043019369894576394	30	Ceacam16, Ttyh1, Cib1, Tgfb1, Car2, Myo10, Cftr, Slc6a6, Cd44, Snap25, Espn, Clic4, Fgf13, Ephb1, Myo1b, Epha4, Slc9a3r1, Enah, Crb1, Nf2, Farp1, Actn2, Gap43, Cbr1, App, Atp6v1b2, Slc10a2, Calb2, Tspear, Scarb1
594	GO:0030017	CC	sarcomere	0.029466032674006343	28	Actn4, Rtn2, Homer1, Pdlim5, Anxa5, Sri, Grin2b, Neb, Ttn, Klhl41, Fkbp1a, Jph1, Myom3, Trim63, Cavin4, Scn8a, Scn3b, Ky, Sphkap, Tcap, Myh1, Pdlim4, Myh6, Myh7, Actn2, Ryr2, Kcnn2, Hspb1
595	GO:0005604	CC	basement membrane	5.7367048720874775e-5	26	Smoc2, Nphs1, Vwa2, Atrnl1, Frem2, Ntng2, Tnc, Tmeff1, Timp1, Egfl6, Ntn4, Loxl1, Anxa2, Col7a1, Vegfa, Col4a3, Serpinf1, Lamb3, Lamc2, Fras1, Fgf9, Loxl2, Adamts1, Col4a2, Col4a1, Col18a1
596	GO:0030018	CC	Z disc	0.0013394487035954536	25	Actn4, Rtn2, Homer1, Pdlim5, Anxa5, Sri, Grin2b, Neb, Ttn, Fkbp1a, Jph1, Trim63, Cavin4, Scn8a, Scn3b, Ky, Sphkap, Tcap, Pdlim4, Myh6, Myh7, Actn2, Ryr2, Kcnn2, Hspb1
597	GO:0031674	CC	I band	0.0036232769730983744	25	Actn4, Rtn2, Homer1, Pdlim5, Anxa5, Sri, Grin2b, Neb, Ttn, Fkbp1a, Jph1, Trim63, Cavin4, Scn8a, Scn3b, Ky, Sphkap, Tcap, Pdlim4, Myh6, Myh7, Actn2, Ryr2, Kcnn2, Hspb1
598	GO:0005925	CC	focal adhesion	0.043494194700171684	25	Nphs1, Tes, Abcb1b, Fermt1, Flrt3, Sdc4, Aif1l, LOC100361457, Epha2, Sdcbp, RGD1566387, Shroom4, Myh9, Adgrb1, Dixdc1, Tns4, Actg1, Enah, Tns3, Ptk2b, Actn2, Phldb2, Bcar1, Lims1, Wasf1
599	GO:0005912	CC	adherens junction	0.028198144339763545	22	Pvr, Plekha7, Pdlim5, Ctnna2, Frmd5, Sdcbp, Shroom4, Pof1b, Wnk3, Myh9, Rnd1, Mtss1, Vegfa, Pdlim4, Pkp1, Crb1, Nectin4, Epha5, Nf2, Cdh1, Kifc3, Ctnna3
600	GO:0099634	CC	postsynaptic specialization membrane	0.04659381613630475	21	Chrna7, Sorcs3, Cnih2, Dlg2, Plppr4, Clstn3, Grin2b, Cnksr2, Scn8a, Grin3b, Chrna3, Shisa9, Efnb3, Cacng4, Grin2c, Chrnb1, Actn2, Prr7, Camk2a, Neto1, Hspb1
601	GO:0098839	CC	postsynaptic density membrane	0.03837066722479409	17	Sorcs3, Cnih2, Dlg2, Plppr4, Clstn3, Grin2b, Cnksr2, Scn8a, Grin3b, Shisa9, Efnb3, Cacng4, Grin2c, Actn2, Prr7, Neto1, Hspb1
602	GO:0034705	CC	potassium channel complex	0.028821864823188534	15	Kcnc3, Kcnq1, Kcnk4, Pde4d, Kcnab1, Hcn1, Dpp6, Kcnj8, Kcna4, Snap25, Kcnb2, Kcnq4, Kcnk2, Kcnma1, Kcng4
603	GO:0016529	CC	sarcoplasmic reticulum	0.02602367253209329	13	Rtn2, Trdn, Gstm7, Hk2, Klhl41, Fkbp1a, Jph1, H6pd, Akap6, Rasd1, Sgcd, Ryr2, Reep5
604	GO:0005581	CC	collagen trimer	0.049461594159732496	11	Col20a1, Cthrc1, Col5a3, Gldn, Col4a3, Sftpd, Col4a2, Col4a1, Lox, Col18a1, Col13a1
605	GO:0099738	CC	cell cortex region	0.04112196790107385	9	Hamp, Nlrp5, Ctnna2, Pclo, Khdc3, Bsn, Rims1, Phldb2, Erc2
606	GO:0097440	CC	apical dendrite	0.01879086024216917	8	Neurl1, Hcn1, Grin2b, Rasgrf1, Sez6, Ppargc1a, Nefh, Ptk2b
607	GO:0031045	CC	dense core granule	0.03388526134742636	8	Slc6a5, Syt7, Pdyn, Ncs1, Chga, Scg2, Kif1a, Plat
608	GO:0033017	CC	sarcoplasmic reticulum membrane	0.03388526134742636	8	Rtn2, Trdn, Klhl41, Fkbp1a, Jph1, Akap6, Ryr2, Reep5
609	GO:0098688	CC	parallel fiber to Purkinje cell synapse	0.03388526134742636	8	Ctnna2, Pclo, Grin2b, Atp2b3, Scn8a, Snap91, Cbln1, Calb2
610	GO:0034385	CC	triglyceride-rich plasma lipoprotein particle	0.006211727489435329	7	Apoc4, Apoc1, Apoe, Pcyox1, Apoa1, App, Lpl
611	GO:0042101	CC	T cell receptor complex	0.003912889991186442	6	Cd3d, Cd3e, Cd3g, Zap70, Skap1, Trat1
612	GO:0099569	CC	presynaptic cytoskeleton	0.003912889991186442	6	Pclo, LOC100361457, Bsn, Rims1, Actg1, Erc2
613	GO:0034361	CC	very-low-density lipoprotein particle	0.019289109955716383	6	Apoc4, Apoc1, Apoe, Pcyox1, Apoa1, Lpl
614	GO:1904090	CC	peptidase inhibitor complex	0.010959645983532029	5	Klk8, Serpina5, Plau, Plat, Serpine1
615	GO:0030546	MF	signaling receptor activator activity	2.7558678926431205e-6	72	Sct, Wnt11, Gpha2, Tgfb1, Nmb, Hamp, Fgf3, Gal, Clcf1, Rln1, Il7, Sema5a, Sfrp2, Reg1a, Lep, Sema3d, Flrt3, Bmp2, Il1rn, Pdyn, Edn3, Gdf5, Enho, C1qtnf12, Edn2, Timp1, Bmp15, Fgf13, Pomc, Dio2, Tafa5, Amh, Wnt10b, Ccn3, Tnfrsf11b, Tg, Apoa1, Ucn2, Sema7a, Erfe, Vegfa, Scg2, Wnt10a, Ccl20, Wnt6, Inha, Wnt9a, Wnt9b, Fgf18, Stc2, Gdf9, Inhbb, Grem2, Lif, Areg, Ereg, Pf4, Spp1, Fgf9, Cxcl14, Inhba, R…
616	GO:0048018	MF	receptor ligand activity	2.7558678926431205e-6	71	Sct, Wnt11, Gpha2, Tgfb1, Nmb, Hamp, Fgf3, Gal, Clcf1, Rln1, Il7, Sema5a, Sfrp2, Reg1a, Lep, Sema3d, Flrt3, Bmp2, Il1rn, Pdyn, Edn3, Gdf5, Enho, C1qtnf12, Edn2, Timp1, Bmp15, Fgf13, Pomc, Dio2, Tafa5, Amh, Wnt10b, Ccn3, Tnfrsf11b, Tg, Apoa1, Ucn2, Sema7a, Erfe, Vegfa, Scg2, Wnt10a, Ccl20, Wnt6, Inha, Wnt9a, Wnt9b, Fgf18, Stc2, Gdf9, Inhbb, Grem2, Lif, Areg, Ereg, Pf4, Spp1, Fgf9, Cxcl14, Inhba, R…
617	GO:0015267	MF	channel activity	0.0026764371218273345	60	Ttyh1, Kcnc3, Kcnq1, Chrna7, Ano5, Trpm1, Kcnk4, Trpm6, Trpc4, Kcnab1, Rhbg, Hcn1, Anxa9, Trpc3, Cftr, Grin2b, Kcnj8, Kcna4, Snap25, Ncs1, Kcnb2, Trpa1, Gabrr2, Clic4, Slc24a2, Kcnq4, Slc26a7, Slc24a4, Panx2, Gsdmd, Ano4, Scn8a, Grin3b, Scn3b, Anxa2, Aqp9, Chrnb4, Chrna3, Ano10, Chrna5, Asic4, Kcnj12, Cacng4, Trpv2, P2rx5, Grin2c, Ttyh2, Chrnb1, Kcnk2, Cnga1, Lrrc8c, Tmem150c, Kcnma1, Slc17a3, Ry…
618	GO:0022803	MF	passive transmembrane transporter activity	0.0026764371218273345	60	Ttyh1, Kcnc3, Kcnq1, Chrna7, Ano5, Trpm1, Kcnk4, Trpm6, Trpc4, Kcnab1, Rhbg, Hcn1, Anxa9, Trpc3, Cftr, Grin2b, Kcnj8, Kcna4, Snap25, Ncs1, Kcnb2, Trpa1, Gabrr2, Clic4, Slc24a2, Kcnq4, Slc26a7, Slc24a4, Panx2, Gsdmd, Ano4, Scn8a, Grin3b, Scn3b, Anxa2, Aqp9, Chrnb4, Chrna3, Ano10, Chrna5, Asic4, Kcnj12, Cacng4, Trpv2, P2rx5, Grin2c, Ttyh2, Chrnb1, Kcnk2, Cnga1, Lrrc8c, Tmem150c, Kcnma1, Slc17a3, Ry…
619	GO:0005216	MF	ion channel activity	0.0010803054568695144	57	Ttyh1, Kcnc3, Kcnq1, Chrna7, Ano5, Trpm1, Kcnk4, Trpm6, Trpc4, Kcnab1, Rhbg, Hcn1, Anxa9, Trpc3, Cftr, Grin2b, Kcnj8, Kcna4, Snap25, Ncs1, Kcnb2, Trpa1, Gabrr2, Clic4, Slc24a2, Kcnq4, Slc26a7, Slc24a4, Ano4, Scn8a, Grin3b, Scn3b, Anxa2, Chrnb4, Chrna3, Ano10, Chrna5, Asic4, Kcnj12, Cacng4, Trpv2, P2rx5, Grin2c, Ttyh2, Chrnb1, Kcnk2, Cnga1, Lrrc8c, Tmem150c, Kcnma1, Slc17a3, Ryr2, Clic6, Cacna2d3,…
620	GO:0046873	MF	metal ion transmembrane transporter activity	0.0015784536414162147	55	Kcnc3, Kcnq1, Slc6a5, Trpm1, Kcnk4, Atp4a, Trpm6, Trpc4, Kcnab1, Anxa5, Hcn1, Anxa9, Trpc3, Slc4a5, Grin2b, Kcnj8, Slc6a6, Kcna4, Slc13a3, Slc23a2, Snap25, Ncs1, Kcnb2, Trpa1, Slc30a2, Slc24a2, Mfsd2a, Kcnq4, Atp2b3, Slc24a4, Myh9, Scn8a, Grin3b, Scn3b, Anxa2, Slc6a20a, Asic4, Kcnj12, Cacng4, Trpv2, Grin2c, Slc13a5, Kcnk2, Slc4a4, Atp12a, Slc39a14, Kcnma1, Slc28a3, Slc17a3, Ryr2, Slc10a2, Cacna2d…
621	GO:0005543	MF	phospholipid binding	0.01975484683540109	54	Apoe, Kcnq1, Sytl2, Doc2a, Mfge8, Syt7, Psd, Snx7, Anxa5, Hcn1, Anxa9, Myo10, Pclo, Dysf, Snx10, Rasgrp1, Sdcbp2, Syt13, Cptp, Sdcbp, Otc, Serpina5, Sptb, Plek2, Gsdmd, Snx31, Anxa13, Mtss1, Adgrb1, Apoa1, Anxa2, Thy1, Snap91, Plcd1, Myo1b, Cps1, Plekhb2, Rufy4, Noxo1, Cd300a, Baiap3, Havcr1, Sh3pxd2b, Tom1l1, Pctp, Alox15, Phlda3, Mark1, Actn2, Epdr1, Gap43, Scarb1, Rph3a, Rasal1
622	GO:0022836	MF	gated channel activity	0.0027570923653207333	45	Ttyh1, Kcnc3, Kcnq1, Chrna7, Ano5, Kcnk4, Kcnab1, Hcn1, Trpc3, Cftr, Grin2b, Kcnj8, Kcna4, Snap25, Ncs1, Kcnb2, Trpa1, Gabrr2, Clic4, Kcnq4, Ano4, Scn8a, Grin3b, Scn3b, Chrnb4, Chrna3, Ano10, Chrna5, Asic4, Kcnj12, Cacng4, P2rx5, Grin2c, Ttyh2, Chrnb1, Kcnk2, Cnga1, Tmem150c, Kcnma1, Slc17a3, Ryr2, Clic6, Cacna2d3, Kcnn2, Kcng4
623	GO:0005261	MF	cation channel activity	0.003887249595607745	45	Kcnc3, Kcnq1, Chrna7, Trpm1, Kcnk4, Trpm6, Trpc4, Kcnab1, Rhbg, Hcn1, Anxa9, Trpc3, Grin2b, Kcnj8, Kcna4, Snap25, Ncs1, Kcnb2, Trpa1, Slc24a2, Kcnq4, Slc24a4, Scn8a, Grin3b, Scn3b, Anxa2, Chrnb4, Chrna3, Ano10, Chrna5, Asic4, Kcnj12, Cacng4, Trpv2, P2rx5, Grin2c, Chrnb1, Kcnk2, Cnga1, Kcnma1, Ryr2, Cacna2d3, Kcnn2, Kcng4, Calhm5
624	GO:0001664	MF	G protein-coupled receptor binding	0.0017047756050800533	44	Gna14, Sct, Wnt11, P2ry2, Gpha2, Nmb, Gal, Tub, Gnat2, Pde4d, S1pr1, Homer1, Grin2b, Pdyn, Edn3, Edn2, Sdcbp, Pomc, Ccdc88c, Tafa5, Myh9, Tac3, Avpr1a, Cthrc1, Wnt10b, Ucn2, Wnt10a, Ccl20, Wnt6, Wnt9a, Wnt9b, Slc9a3r1, Rnf43, Kiss1, Pf4, Ramp3, Cxcl14, Clic6, Mrap, App, Insl3, Necab2, Gnaz, Hspa1a
625	GO:1901681	MF	sulfur compound binding	0.0036656085041741333	38	Apoe, Smoc2, Pcsk6, Sema5a, Gstm7, Lrtm2, Slc6a6, Gss, Acot7, Soat2, Ccn3, Col5a3, PCOLCE2, Ltf, Vegfa, Serpine2, Ltc4s, Grem2, Lamc2, Serpinc1, Pf4, Ogdh, Fgf9, H1f1, Ryr2, App, Adamts1, Lpl, Comp, Fgf1, Hbegf, Lipg, Adgrg1, Mpig6b, Cbs, Col13a1, Tmem184a, Acacb
626	GO:0050839	MF	cell adhesion molecule binding	0.01975484683540109	37	Itgad, Mfge8, Fxyd5, Nphs1, Pvr, Gfra1, Itga10, Trpc4, Sfrp2, Ctnna2, Grin2b, Frmd5, Fermt1, Sdcbp, Cdh17, Plxnb3, Egfl6, Myh9, Ccn3, Cadm1, Thy1, Gldn, Sema7a, Col4a3, Itgae, Igsf9, Pkp1, Spp1, Nf2, Itga8, App, Comp, Tenm3, Fgf1, Cd226, Cdh1, Ctnna3
627	GO:0008509	MF	anion transmembrane transporter activity	0.025177394834044464	37	Ttyh1, Abcc6, Slc6a5, Ano5, Slc22a6, Cftr, Slc4a5, Slc6a6, Slc25a25, Slc13a3, Slc23a2, Slco5a1, Gabrr2, Clic4, Slc24a2, Mfsd2a, Slc26a7, Slc24a4, Ano4, Slc38a3, Slco2a1, Ano10, Slc6a20a, Slc13a2, Ttyh2, Slc9a3r1, Slc13a5, Slc16a11, Mpc2, Slc4a4, Lrrc8c, Abcc4, Slc39a14, Sfxn1, Slc17a3, Clic6, Slc25a15
628	GO:0005125	MF	cytokine activity	2.1964867101767195e-4	34	Wnt11, Tgfb1, Clcf1, Il7, Lep, Bmp2, Il1rn, Gdf5, Timp1, Bmp15, Tafa5, Wnt10b, Tnfrsf11b, Vegfa, Scg2, Wnt10a, Ccl20, Wnt6, Inha, Wnt9a, Wnt9b, Gdf9, Inhbb, Grem2, Lif, Areg, Pf4, Spp1, Cxcl14, Inhba, Retnlg, Gdf10, Crlf1, Il34
629	GO:0005539	MF	glycosaminoglycan binding	0.001992146251919943	34	Apoe, Smoc2, Pcsk6, Hapln3, Mamdc2, Sema5a, Vcan, Reg1a, Lrtm2, Cd44, Ccn3, Col5a3, PCOLCE2, Ltf, Vegfa, Serpine2, Grem2, Lamc2, Serpinc1, Pf4, Fgf9, H1f1, App, Adamts1, Lpl, Comp, Fgf1, Hbegf, Lipg, Adgrg1, Hk1, Mpig6b, Col13a1, Tmem184a
630	GO:0031406	MF	carboxylic acid binding	0.001565329198938434	30	Apoc1, Igf2r, Folr1, Dhfr, S100a8, Gstm7, Fabp4, Lrat, Grm8, Grin2b, Gss, Ptgds, Gpr143, Pygl, Serpina5, Vdr, Grin3b, Hmbs, Rbp2, Cps1, Fabp6, Nags, LOC360919, Akr1c2, Prr7, Epdr1, Akr1c3, Akr1c1, Pla2g1b, Acacb
631	GO:0008083	MF	growth factor activity	2.992820446600603e-4	28	Tgfb1, Fgf3, Il7, Reg1a, Lep, Bmp2, Gdf5, Timp1, Bmp15, Fgf13, Amh, Ccn3, Vegfa, Inha, Fgf18, Gdf9, Inhbb, Lif, Areg, Ereg, Fgf9, Inhba, Gdf10, Fgf1, Hbegf, Osgin1, Il34, Vgf
632	GO:0051015	MF	actin filament binding	0.03236548999890722	28	Actn4, Myo10, Ctnna2, Actr3b, Neb, Ttn, Fermt1, Aif1l, Myom3, Espn, Shroom4, Pof1b, Sptb, Myh9, Mtss1, Pknox2, Anxa2, Myo1b, Fmnl1, Myh1, Ablim2, Myh6, Myh7, Actn2, Myh15, Myo16, Cotl1, Micall2
633	GO:0019955	MF	cytokine binding	6.424510090679015e-4	27	Gbp1, Osmr, Bmpr1b, A2m, Il23r, Il12rb2, Cd44, Il1rn, Gdf5, Cntfr, Tnfrsf9, Csf3r, Chrdl1, Plp2, Sostdc1, Ccr9, Cxcr6, Cxcr2, Il1r2, Tcap, Grem2, Tnfrsf11a, Kit, Il2ra, Ucma, Crlf1, Comp
634	GO:0008201	MF	heparin binding	0.0026939692979788374	27	Apoe, Smoc2, Pcsk6, Lrtm2, Ccn3, Col5a3, PCOLCE2, Ltf, Vegfa, Serpine2, Grem2, Lamc2, Serpinc1, Pf4, Fgf9, H1f1, App, Adamts1, Lpl, Comp, Fgf1, Hbegf, Lipg, Adgrg1, Mpig6b, Col13a1, Tmem184a
635	GO:0005244	MF	voltage-gated ion channel activity	0.01975484683540109	27	Kcnc3, Kcnq1, Kcnab1, Hcn1, Grin2b, Kcnj8, Kcna4, Snap25, Ncs1, Kcnb2, Trpa1, Clic4, Kcnq4, Scn8a, Grin3b, Scn3b, Kcnj12, Cacng4, P2rx5, Grin2c, Kcnk2, Kcnma1, Slc17a3, Clic6, Cacna2d3, Kcnn2, Kcng4
636	GO:0022832	MF	voltage-gated channel activity	0.01975484683540109	27	Kcnc3, Kcnq1, Kcnab1, Hcn1, Grin2b, Kcnj8, Kcna4, Snap25, Ncs1, Kcnb2, Trpa1, Clic4, Kcnq4, Scn8a, Grin3b, Scn3b, Kcnj12, Cacng4, P2rx5, Grin2c, Kcnk2, Kcnma1, Slc17a3, Clic6, Cacna2d3, Kcnn2, Kcng4
637	GO:0019887	MF	protein kinase regulator activity	0.023395219277849422	27	Cib1, Wnt11, Tgfb1, Cdkn1c, Ccno, Bmpr1b, Prkag2, Trib3, Bmp2, Ncs1, Cdkn2b, Fgf13, Prkar2b, Tcl1a, Trib1, Ltf, Ccnf, Tom1l1, Fam20a, Rgcc, Map3k13, Spry4, Mt3, Cdkn1a, Hspb1, Prkar1b, Cit
638	GO:0016616	MF	oxidoreductase activity, acting on the CH-OH group of donors, NAD or NADP as acceptor	0.0027570923653207333	24	Kcnab1, Hsd3b2, Hsd3b5, Hsd3b3, Hsd3b1, Akr1b7, Sord, Dhrs9, H6pd, G6pd, Sdr9c7, Gpd1, Idh1, Aldh3a1, Hsd17b1, Hsd11b1, Hsd17b7, Akr1c2, Akr1c13, Akr1c12, Akr1c3, Akr1c1, Cbr1, Hsd17b2
639	GO:0016614	MF	oxidoreductase activity, acting on CH-OH group of donors	0.006679478450317208	24	Kcnab1, Hsd3b2, Hsd3b5, Hsd3b3, Hsd3b1, Akr1b7, Sord, Dhrs9, H6pd, G6pd, Sdr9c7, Gpd1, Idh1, Aldh3a1, Hsd17b1, Hsd11b1, Hsd17b7, Akr1c2, Akr1c13, Akr1c12, Akr1c3, Akr1c1, Cbr1, Hsd17b2
640	GO:0001653	MF	peptide receptor activity	0.012893072394817977	24	Nlrp6, Gal, F2rl1, F2rl2, Gpr37, Tacr1, Gucy2c, Aplnr, Npr2, Oprk1, Gpr143, Agtr2, Fshr, Vipr2, Gpr182, Avpr1a, Ccr9, Cxcr6, Cxcr2, Pth2r, Crhr1, Gpr37l1, Ramp3, Npffr1
641	GO:0008514	MF	organic anion transmembrane transporter activity	0.043303874864911454	24	Slc6a5, Slc22a6, Cftr, Slc4a5, Slc6a6, Slc25a25, Slc13a3, Slc23a2, Slco5a1, Mfsd2a, Slc26a7, Slc38a3, Slco2a1, Slc6a20a, Slc13a2, Slc9a3r1, Slc13a5, Slc16a11, Mpc2, Slc4a4, Abcc4, Sfxn1, Slc17a3, Slc25a15
642	GO:0072341	MF	modified amino acid binding	2.2311037689591484e-4	23	Sytl2, Mfge8, Syt7, Folr1, Dhfr, Gstm7, Anxa9, Gss, Syt13, Gpr143, Gsdmd, Anxa13, Adgrb1, Anxa2, Plcd1, Cps1, Cd300a, Havcr1, Ltc4s, Mark1, Gap43, Cbs, Scarb1
643	GO:0005179	MF	hormone activity	0.0033067348601798553	23	Sct, Gpha2, Nmb, Hamp, Gal, Rln1, Lep, Edn3, Enho, C1qtnf12, Edn2, Pomc, Dio2, Tg, Ucn2, Erfe, Inha, Stc2, Inhbb, Inhba, Retnlg, Insl3, Vgf
644	GO:0070851	MF	growth factor receptor binding	0.014474013475634904	23	Cadm4, Fgf3, Il7, Vav3, Il23r, Grin2b, Cd44, Flrt3, Il1rn, Sdcbp, Tlr9, Plscr1, Vegfa, Slc9a3r1, Fgf18, Tlr5, Areg, Ereg, Fgf9, App, Fgf1, Hbegf, Kl
645	GO:0019838	MF	growth factor binding	0.01852414138122262	23	Pcsk6, Igf2r, Osmr, A2m, Pzp, Il1rn, Epha2, Sdcbp, Chrdl1, Crim1, Ccn3, Vegfa, Gpc1, Igfbp5, Il1r2, Igfals, Ngfr, Epha5, Igfbp3, Il2ra, Col4a1, Flt1, Kl
646	GO:0043177	MF	organic acid binding	0.023467413154902923	23	Igf2r, Folr1, Dhfr, S100a8, Lrat, Grm8, Grin2b, Slc6a6, Gss, Ass1, Gpr143, Otc, Serpina5, Vdr, Grin3b, Cps1, Hba-a3, Nags, Ddc, Akr1c2, Ryr2, Mat1a, Acacb
647	GO:0046943	MF	carboxylic acid transmembrane transporter activity	0.02905953694260322	23	Slc6a5, Slc16a4, Slc6a6, Slc13a3, Slc23a2, Mfsd2a, Slc26a7, Slc16a2, Slc38a3, Slc6a20a, Slc16a6, Slc13a2, Slc9a3r1, Slc16a5, Slc13a5, Slc16a11, Mpc2, Abcc4, Sfxn1, Slc51a, Slc7a4, Slc25a15, Slc10a2
648	GO:0005342	MF	organic acid transmembrane transporter activity	0.030764842587968882	23	Slc6a5, Slc16a4, Slc6a6, Slc13a3, Slc23a2, Mfsd2a, Slc26a7, Slc16a2, Slc38a3, Slc6a20a, Slc16a6, Slc13a2, Slc9a3r1, Slc16a5, Slc13a5, Slc16a11, Mpc2, Abcc4, Sfxn1, Slc51a, Slc7a4, Slc25a15, Slc10a2
649	GO:0008528	MF	G protein-coupled peptide receptor activity	0.022811824533928354	22	Nlrp6, Gal, F2rl1, F2rl2, Gpr37, Tacr1, Aplnr, Oprk1, Gpr143, Agtr2, Fshr, Vipr2, Gpr182, Avpr1a, Ccr9, Cxcr6, Cxcr2, Pth2r, Crhr1, Gpr37l1, Ramp3, Npffr1
650	GO:0005178	MF	integrin binding	0.023965673277790717	22	Itgad, Mfge8, Gfra1, Itga10, Sfrp2, Frmd5, Fermt1, Cdh17, Egfl6, Myh9, Ccn3, Thy1, Sema7a, Col4a3, Itgae, Spp1, Nf2, Itga8, App, Comp, Fgf1, Cd226
651	GO:0052689	MF	carboxylic ester hydrolase activity	0.04112196790107385	22	Gde1, Pnliprp2, Lipe, Pnlip, Car2, Mgll, Ptrh1, H6pd, Acot7, Acot9, Plb1, Acot2, Acot1, Abhd5, Notum, Proca1, Pla1a, Plaat1, Lpl, Lipg, Pnpla1, Pla2g1b
652	GO:0019842	MF	vitamin binding	0.01991716288928479	21	Psat1, Folr1, Dhfr, Abca4, Lrat, Nfs1, Sptlc3, Accsl, Alas2, S100g, Pygl, Vdr, Rbp2, Ddc, Ogdh, Sptlc1, Comp, Aadat, Gpt2, Cbs, Acacb
653	GO:0015081	MF	sodium ion transmembrane transporter activity	0.032231777264014404	21	Slc6a5, Atp4a, Hcn1, Slc4a5, Slc6a6, Slc13a3, Slc23a2, Slc24a2, Mfsd2a, Slc24a4, Myh9, Scn8a, Scn3b, Slc6a20a, Asic4, Slc13a5, Slc4a4, Atp12a, Slc28a3, Slc17a3, Slc10a2
654	GO:0022843	MF	voltage-gated cation channel activity	0.032231777264014404	21	Kcnc3, Kcnq1, Kcnab1, Hcn1, Grin2b, Kcnj8, Kcna4, Snap25, Ncs1, Kcnb2, Trpa1, Kcnq4, Grin3b, Kcnj12, Cacng4, Grin2c, Kcnk2, Kcnma1, Cacna2d3, Kcnn2, Kcng4
655	GO:0003774	MF	cytoskeletal motor activity	0.0023282493575682277	20	Gpr88, Myo10, Dync1i1, Kif2c, Kif24, Myh9, Kif9, Kif15, Myo1b, Kif1a, Dnai2, Myh1, Kif26b, Kif14, Myh6, Myh7, Myh15, Myo16, Kifc3, Dnah8
656	GO:0015276	MF	ligand-gated ion channel activity	0.03302618861470954	20	Chrna7, Hcn1, Cftr, Grin2b, Kcnj8, Trpa1, Gabrr2, Grin3b, Chrnb4, Chrna3, Chrna5, Asic4, Kcnj12, P2rx5, Grin2c, Chrnb1, Cnga1, Kcnma1, Ryr2, Kcnn2
657	GO:0022834	MF	ligand-gated channel activity	0.03876895333832625	20	Chrna7, Hcn1, Cftr, Grin2b, Kcnj8, Trpa1, Gabrr2, Grin3b, Chrnb4, Chrna3, Chrna5, Asic4, Kcnj12, P2rx5, Grin2c, Chrnb1, Cnga1, Kcnma1, Ryr2, Kcnn2
658	GO:0016209	MF	antioxidant activity	9.575087856690307e-4	19	Apoe, Gsto2, Prdx5, Prdx3, Glrx, S100a8, S100a9, Gstm7, Duox1, Tp53inp1, Gpx2, Gpx1, Txndc2, Ltc4s, Hba-a3, Ptgs2, Sod3, Hp, Gstt1
659	GO:0033293	MF	monocarboxylic acid binding	0.0012455056167379852	19	Apoc1, Igf2r, S100a8, Gstm7, Fabp4, Lrat, Ptgds, Pygl, Serpina5, Vdr, Rbp2, Fabp6, LOC360919, Akr1c2, Prr7, Akr1c3, Akr1c1, Pla2g1b, Acacb
660	GO:1902936	MF	phosphatidylinositol bisphosphate binding	0.01618681301132941	19	Kcnq1, Sytl2, Syt7, Hcn1, Anxa9, Sdcbp2, Sdcbp, Plek2, Gsdmd, Anxa2, Snap91, Plcd1, Myo1b, Sh3pxd2b, Alox15, Phlda3, Mark1, Actn2, Rph3a
661	GO:0015293	MF	symporter activity	0.0437196162595237	19	Slc6a5, Slc4a5, Slc6a6, Slc13a3, Slc23a2, Slc24a2, Mfsd2a, Slc16a2, Slc38a3, Slc6a20a, Slc13a2, Slc13a5, Slc4a4, Slc39a14, Slc28a3, Slc17a3, Slc20a2, Slc10a2, Naglt1
662	GO:0015085	MF	calcium ion transmembrane transporter activity	0.049461594159732496	19	Trpm1, Trpm6, Trpc4, Anxa5, Anxa9, Trpc3, Grin2b, Ncs1, Trpa1, Slc24a2, Atp2b3, Slc24a4, Grin3b, Anxa2, Cacng4, Trpv2, Grin2c, Ryr2, Cacna2d3
663	GO:0005496	MF	steroid binding	0.012858704712862781	18	Hsd3b5, Hsd3b1, S100g, Esr2, Vdr, Tspo, Soat2, Apoa1, Pgr, Rora, Cyp11a1, Nfe2l1, Hsd17b1, Hsd11b1, Gpr183, Akr1c2, Star, Comp
664	GO:0005546	MF	phosphatidylinositol-4,5-bisphosphate binding	0.006679478450317208	17	Kcnq1, Sytl2, Syt7, Hcn1, Anxa9, Sdcbp2, Sdcbp, Gsdmd, Anxa2, Snap91, Plcd1, Myo1b, Alox15, Phlda3, Mark1, Actn2, Rph3a
665	GO:0099094	MF	ligand-gated cation channel activity	0.025920160907761888	17	Chrna7, Hcn1, Grin2b, Kcnj8, Trpa1, Grin3b, Chrnb4, Chrna3, Chrna5, Asic4, Kcnj12, P2rx5, Grin2c, Chrnb1, Cnga1, Ryr2, Kcnn2
666	GO:0016298	MF	lipase activity	0.04322071457349951	17	Gde1, Pnliprp2, Lipe, Pnlip, Smpd1, Mgll, Plb1, Plcd1, Notum, Proca1, Ddhd1, Pla1a, Plaat1, Lpl, Lipg, Pnpla1, Pla2g1b
667	GO:0042562	MF	hormone binding	0.018753933635233387	16	Crym, Anxa5, Gucy2c, Npr2, Fshr, Esr2, Vipr2, Tspo, Avpr1a, Amhr2, Ucn2, Pgr, Ctsh, Pth2r, Crhr1, Inhba
668	GO:0031490	MF	chromatin DNA binding	0.04130889033278944	16	Actn4, Foxo1, H1f8, Tox2, Cebpb, Tox, Gata1, Hmga2, Runx2, Ppargc1a, H4f3, H1f4, H1f1, H1f6, Bcl6, Tox3
669	GO:0001786	MF	phosphatidylserine binding	0.003048142981225052	15	Sytl2, Mfge8, Syt7, Anxa9, Syt13, Gsdmd, Anxa13, Adgrb1, Anxa2, Plcd1, Cd300a, Havcr1, Mark1, Gap43, Scarb1
670	GO:0016229	MF	steroid dehydrogenase activity	1.1511738454284843e-4	14	Hsd3b2, Hsd3b5, Hsd3b3, Hsd3b1, Dhrs9, Hsd17b1, Hsd11b1, Hsd17b7, Akr1c2, Akr1c13, Akr1c12, Akr1c3, Akr1c1, Hsd17b2
671	GO:0050661	MF	NADP binding	0.007252808374983631	13	Dhcr7, Crym, Kcnab1, Dhfr, H6pd, Decr1, G6pd, Idh1, Fdxr, Hsd17b1, Hsd11b1, Fmo1, Akr1c2
672	GO:0004860	MF	protein kinase inhibitor activity	0.010932352750208854	13	Cib1, Cdkn1c, Prkag2, Trib3, Ncs1, Cdkn2b, Prkar2b, Trib1, Spry4, Cdkn1a, Hspb1, Prkar1b, Cit
673	GO:0019210	MF	kinase inhibitor activity	0.017839074720634705	13	Cib1, Cdkn1c, Prkag2, Trib3, Ncs1, Cdkn2b, Prkar2b, Trib1, Spry4, Cdkn1a, Hspb1, Prkar1b, Cit
674	GO:0033764	MF	steroid dehydrogenase activity, acting on the CH-OH group of donors, NAD or NADP as acceptor	1.9468972970198734e-4	12	Hsd3b2, Hsd3b5, Hsd3b3, Hsd3b1, Dhrs9, Hsd17b1, Hsd11b1, Hsd17b7, Akr1c2, Akr1c3, Akr1c1, Hsd17b2
675	GO:0008374	MF	O-acyltransferase activity	0.0073925067093535135	12	Lrat, Lpcat3, Agpat2, Gpat2, Crat, Cpt2, Soat2, Abhd5, Mogat1, Gpat3, Plaat1, Lpcat2
676	GO:0015370	MF	solute:sodium symporter activity	0.048096482682219145	12	Slc6a5, Slc4a5, Slc6a6, Slc13a3, Slc23a2, Mfsd2a, Slc6a20a, Slc13a5, Slc4a4, Slc28a3, Slc17a3, Slc10a2
677	GO:0005109	MF	frizzled binding	0.004240790452636316	11	Wnt11, Sdcbp, Ccdc88c, Cthrc1, Wnt10b, Wnt10a, Wnt6, Wnt9a, Wnt9b, Rnf43, App
678	GO:0030170	MF	pyridoxal phosphate binding	0.018747326913400992	11	Psat1, Nfs1, Sptlc3, Accsl, Alas2, Pygl, Ddc, Sptlc1, Aadat, Gpt2, Cbs
679	GO:0005544	MF	calcium-dependent phospholipid binding	0.023467413154902923	11	Doc2a, Syt7, Anxa5, Anxa9, Pclo, Dysf, Syt13, Anxa13, Anxa2, Plcd1, Rph3a
680	GO:0070279	MF	vitamin B6 binding	0.023467413154902923	11	Psat1, Nfs1, Sptlc3, Accsl, Alas2, Pygl, Ddc, Sptlc1, Aadat, Gpt2, Cbs
681	GO:0008028	MF	monocarboxylic acid transmembrane transporter activity	0.031799951240424854	11	Slc16a4, Slc6a6, Mfsd2a, Slc16a6, Slc9a3r1, Slc16a5, Slc16a11, Mpc2, Abcc4, Slc51a, Slc10a2
682	GO:0003777	MF	microtubule motor activity	0.038360441766728696	11	Dync1i1, Kif2c, Kif24, Kif9, Kif15, Kif1a, Dnai2, Kif26b, Kif14, Kifc3, Dnah8
683	GO:0098918	MF	structural constituent of synapse	0.002667148721850254	10	Dlg2, Homer1, Pclo, LOC100361457, Bsn, Dlgap1, Rims1, Actg1, Nefh, Erc2
684	GO:0004601	MF	peroxidase activity	0.04185735783459577	10	Prdx5, Prdx3, Gstm7, Duox1, Gpx2, Gpx1, Ltc4s, Hba-a3, Ptgs2, Gstt1
685	GO:0030291	MF	protein serine/threonine kinase inhibitor activity	0.008904181530698968	9	Cib1, Cdkn1c, Prkag2, Cdkn2b, Prkar2b, Cdkn1a, Hspb1, Prkar1b, Cit
686	GO:0071855	MF	neuropeptide receptor binding	0.022896064329516855	9	Nmb, Gal, Edn3, Edn2, Pomc, Tac3, Ucn2, Kiss1, Mrap
687	GO:0036122	MF	BMP binding	0.0018607011412882903	8	Bmpr1b, Gdf5, Chrdl1, Sostdc1, Tcap, Grem2, Ucma, Comp
688	GO:0004806	MF	triglyceride lipase activity	0.004197797377151602	8	Pnliprp2, Lipe, Pnlip, Plb1, Pla1a, Lpl, Lipg, Pnpla1
689	GO:0004033	MF	aldo-keto reductase (NADP) activity	0.038360441766728696	8	Kcnab1, Akr1b7, Aldh3a1, Akr1c2, Akr1c13, Akr1c12, Akr1c3, Akr1c1
690	GO:0042165	MF	neurotransmitter binding	0.01618681301132941	7	Chrna7, Grin2b, Grin3b, Chrnb4, Chrna3, Chrna5, Chrnb1
691	GO:0047834	MF	D-threo-aldose 1-dehydrogenase activity	0.01975484683540109	7	Kcnab1, Akr1b7, Akr1c2, Akr1c13, Akr1c12, Akr1c3, Akr1c1
692	GO:0005343	MF	organic acid:sodium symporter activity	0.038360441766728696	7	Slc6a5, Slc6a6, Slc13a3, Slc23a2, Slc6a20a, Slc13a5, Slc10a2
693	GO:0008106	MF	alcohol dehydrogenase (NADP+) activity	0.04997674633551993	7	Akr1b7, Aldh3a1, Akr1c2, Akr1c13, Akr1c12, Akr1c3, Akr1c1
694	GO:0032052	MF	bile acid binding	0.003912889991186442	6	Pygl, Vdr, Akr1c2, Akr1c3, Akr1c1, Pla2g1b
695	GO:0015464	MF	acetylcholine receptor activity	0.024008873408356547	6	Chrna7, Anxa9, Chrnb4, Chrna3, Chrna5, Chrnb1
696	GO:0033549	MF	MAP kinase phosphatase activity	0.024008873408356547	6	Dusp5, Dusp16, Dusp6, Dusp14, Dusp13, Dusp4
697	GO:0004032	MF	alditol:NADP+ 1-oxidoreductase activity	0.029434711567922843	6	Akr1b7, Akr1c2, Akr1c13, Akr1c12, Akr1c3, Akr1c1
698	GO:0071617	MF	lysophospholipid acyltransferase activity	0.035326991559641654	6	Lpcat3, Agpat2, Gpat2, Abhd5, Gpat3, Lpcat2
699	GO:0016411	MF	acylglycerol O-acyltransferase activity	0.04185735783459577	6	Agpat2, Gpat2, Abhd5, Mogat1, Gpat3, Lpcat2
700	GO:0099186	MF	structural constituent of postsynapse	0.04185735783459577	6	Dlg2, Homer1, LOC100361457, Dlgap1, Actg1, Nefh
701	GO:0047086	MF	ketosteroid monooxygenase activity	0.015265953380039953	5	Akr1c2, Akr1c13, Akr1c12, Akr1c3, Akr1c1
702	GO:0042166	MF	acetylcholine binding	0.020763644282509697	5	Chrna7, Chrnb4, Chrna3, Chrna5, Chrnb1
703	GO:0003841	MF	1-acylglycerol-3-phosphate O-acyltransferase activity	0.027357549859359575	5	Agpat2, Gpat2, Abhd5, Gpat3, Lpcat2
704	GO:0017017	MF	MAP kinase tyrosine/serine/threonine phosphatase activity	0.027357549859359575	5	Dusp5, Dusp16, Dusp6, Dusp14, Dusp4
705	GO:0055102	MF	lipase inhibitor activity	0.027357549859359575	5	Apoc1, Scgb1a1, Anxa9, Apoa1, Anxa2
706	GO:0005536	MF	glucose binding	0.03466731250201175	5	Hk2, G6pd, Pygl, Hk1, Hkdc1
707	GO:0016717	MF	oxidoreductase activity, acting on paired donors, with oxidation of a pair of donors resulting in the reduction of molecular oxygen to two molecules of water	0.03466731250201175	5	LOC681458, Scd, Fads2, LOC498300, RGD1564463
708	GO:0017081	MF	chloride channel regulator activity	0.03466731250201175	5	Chrna7, Cftr, Wnk3, Slc9a3r1, Wnk2
709	GO:0015643	MF	toxic substance binding	0.04317224701106146	5	Chrna7, Gucy2c, Ass1, Gsta4, Nefh
710	GO:0008330	MF	protein tyrosine/threonine phosphatase activity	0.049461594159732496	4	Dusp5, Dusp16, Dusp6, Dusp4
711	GO:0030283	MF	testosterone dehydrogenase [NAD(P)] activity	0.049461594159732496	4	Hsd3b2, Dhrs9, Hsd17b1, Hsd17b2
