# Supplementary material for: Molecular Action of Tamoxifen in the Ovaries of Rats with Mammary Neoplasia
Source: Int J Mol Sci. 2023 Oct 30;24(21):15767. doi: 10.3390/ijms242115767 (PMC10649132; doi:10.3390/ijms242115767)
Supplement: Supplementary file 1 [file ijms-24-15767-s001.zip › supplementary/Table S5.xlsx]

## Sheet: Tab. S5
Supplementary Table S5. KEGG enrichment analysis of the differentially expressed genes identified in ovaries of tumor-bearing rats treated with tamoxifen
No.	KEGG ID	KEGG name	P-adjusted	Number of DEGs enriched to particular KEGG	List of DEGs enriched to the particular KEGG
1	rno04913	Ovarian steroidogenesis	4.4612006082070686e-4	17	Hsd3b2, Hsd3b5, Hsd3b3, Hsd3b1, Alox5, Bmp15, Fshr, Acot4, Acot2, Acot1, Cyp11a1, Hsd17b1, Ptgs2, Hsd17b7, Star, Hsd17b2, Scarb1
2	rno04060	Cytokine-cytokine receptor interaction	0.011143735695373178	40	Tgfb1, Relt, Clcf1, Il27, Il7, Osmr, Bmpr1b, Lep, Il23r, Il12rb2, Bmp2, Il1rn, Gdf5, Cntfr, Tnfrsf9, Csf3r, Bmp15, Amh, Amhr2, Tnfrsf11b, Ccr9, Cxcr6, Cxcr2, Ccl20, Inha, Il1r2, Tnfrsf12a, Gdf9, Ngfr, Inhbb, Tnfrsf11a, Tnfsf18, Lif, Pf4, Tnfrsf19, Cxcl14, Il2ra, Inhba, Gdf10, Il34
3	rno00561	Glycerolipid metabolism	0.011223750999587202	15	Pnliprp2, Pnlip, Plpp4, Plpp1, Akr1b7, Mgll, Lpin3, Agpat2, Gpat2, Aldh1b1, Dgkk, Mogat1, Gpat3, Lpl, Lipg
4	rno04390	Hippo signaling pathway	0.020710805649916408	26	Wnt11, Tgfb1, Dlg2, Bmpr1b, Ctnna2, Tead4, Bmp2, Crb2, Gdf5, LOC100361457, Id2, Amh, Wnt10b, Wnt10a, Wnt6, Wnt9a, Wnt9b, Actg1, Crb1, Areg, Nf2, Fgf1, Cdh1, Ctnna3, Serpine1, Ywhag
5	rno04979	Cholesterol metabolism	0.025848972052562282	12	Apoc1, Apoe, Angptl4, Tspo, Soat2, Apoa1, Angptl8, Vapa, Star, Lpl, Lipg, Scarb1
6	rno04927	Cortisol synthesis and secretion	0.03624968958700303	14	Hsd3b2, Creb3l4, Hsd3b5, Hsd3b3, Hsd3b1, Kcna4, Creb3l1, Nr0b1, Pomc, Cyp11a1, Kcnk2, Mrap, Star, Scarb1
7	rno01040	Biosynthesis of unsaturated fatty acids	0.03624968958700303	9	LOC681458, Scd, Fads2, Elovl6, Acot7, Acot4, Acot2, Acot1, Elovl2
8	rno01230	Biosynthesis of amino acids	0.03624968958700303	15	Psat1, Pgam1, Asns, Bcat1, Ass1, Otc, Pgk1, Cps1, Idh1, Nags, Pgam2, Mat1a, Gpt2, Cbs, Sdsl
9	rno03320	PPAR signaling pathway	0.03624968958700303	16	LOC681458, Scd, Fads2, Fabp4, Cpt2, Plin2, Ppara, Angptl4, Apoa1, Acsbg1, Plin5, Acsl3, Acsl6, Fabp6, Acsl1, Lpl
10	rno00910	Nitrogen metabolism	0.04120582585089199	6	Ca13, Ca3, Ca14, Car2, Ca5b, Cps1
11	rno04934	Cushing syndrome	0.04120582585089199	24	Wnt11, Hsd3b2, Creb3l4, Hsd3b5, Hsd3b3, Hsd3b1, Kcna4, Creb3l1, Cdkn2b, Pomc, Wnt10b, Cyp11a1, Wnt10a, Wnt6, Crhr1, Rasd1, Wnt9a, Wnt9b, Kcnk2, Mrap, Star, Camk2a, Cdkn1a, Scarb1
