# Supplementary material for: Molecular Action of Tamoxifen in the Ovaries of Rats with Mammary Neoplasia
Source: Int J Mol Sci. 2023 Oct 30;24(21):15767. doi: 10.3390/ijms242115767 (PMC10649132; doi:10.3390/ijms242115767)
Supplement: Supplementary file 1 [file ijms-24-15767-s001.zip › supplementary/Table S6.pdf]

Supplementary Table S6. The comparison of lncRNAs and protein coding transcripts

| Gene type                         | Number of transcripts | Transcript length (nt) |           | Exon length (nt) |          | Exon number |         |
|-----------------------------------|-----------------------|------------------------|-----------|------------------|----------|-------------|---------|
|                                   |                       | Mean±SD                | Min/Max   | Mean±SD          | Min/Max  | Mean±SD     | Min/Max |
| <b>lncRNA</b>                     | 4287                  | 1878.6±2053.3          | 256/32349 | 642.1±1204       | 10/18431 | 2.93±1.4    | 1/16    |
| <b>Protein coding transcripts</b> | 45893                 | 2870.6±2345.5          | 27/107207 | 259.9±131.6      | 1/19890  | 11.1±10.7   | 1/349   |
