# Supplementary material for: Molecular Action of Tamoxifen in the Ovaries of Rats with Mammary Neoplasia
Source: Int J Mol Sci. 2023 Oct 30;24(21):15767. doi: 10.3390/ijms242115767 (PMC10649132; doi:10.3390/ijms242115767)
Supplement: Supplementary file 1 [file ijms-24-15767-s001.zip › supplementary/Table S7.xlsx]

## Sheet: Tab. S7
Supplementary Table S7. Differentially expressed lncRNA (log2FC ≥ 1 and padj⩽0.05) identified in the ovaries of tumor-bearing rats treated with tamoxifen
No.	lncRNA ID	lncRNA xlock	lncRNA locus	log2FC	P-adjusted
1	MSTRG.16924	XLOC_027532	8:49844001:49849412	-4.499376451773035	0.002025649078530662
2	MSTRG.9891	XLOC_015265	2:186188531:186190751	-4.2027045213900145	2.474750241757575e-8
3	ENSRNOG00000067729	-	7:67733989:67753086	-3.966088756951331	1.1639412346531016e-6
4	ENSRNOG00000067729	-	7:67734007:67753442	-3.966088756951331	1.1639412346531016e-6
5	ENSRNOG00000067729	-	7:67734007:67753086	-3.966088756951331	1.1639412346531016e-6
6	ENSRNOG00000067729	-	7:67734007:67749390	-3.966088756951331	1.1639412346531016e-6
7	ENSRNOG00000067729	-	7:67734007:67744797	-3.966088756951331	1.1639412346531016e-6
8	ENSRNOG00000067729	-	7:67734011:67752287	-3.966088756951331	1.1639412346531016e-6
9	ENSRNOG00000067729	-	7:67734067:67753086	-3.966088756951331	1.1639412346531016e-6
10	ENSRNOG00000070797	-	14:83406164:83425204	-3.891884079359143	2.3501013077549736e-13
11	ENSRNOG00000071212	-	19:47467970:47480763	-3.382075344284007	4.0464260167213655e-12
12	ENSRNOG00000071212	-	19:47467970:47476595	-3.382075344284007	4.0464260167213655e-12
13	ENSRNOG00000071212	-	19:47467970:47476222	-3.382075344284007	4.0464260167213655e-12
14	ENSRNOG00000071212	-	19:47467970:47475914	-3.382075344284007	4.0464260167213655e-12
15	ENSRNOG00000071212	-	19:47467970:47471722	-3.382075344284007	4.0464260167213655e-12
16	ENSRNOG00000071212	-	19:47467983:47471722	-3.382075344284007	4.0464260167213655e-12
17	ENSRNOG00000053476	-	4:169351795:169385811	-3.356837594190268	0.0025110501542163874
18	ENSRNOG00000053476	-	4:169362446:169385811	-3.356837594190268	0.0025110501542163874
19	ENSRNOG00000053476	-	4:169370845:169385811	-3.356837594190268	0.0025110501542163874
20	ENSRNOG00000053476	-	4:169371703:169385811	-3.356837594190268	0.0025110501542163874
21	ENSRNOG00000053476	-	4:169373764:169385811	-3.356837594190268	0.0025110501542163874
22	ENSRNOG00000053476	-	4:169379624:169385811	-3.356837594190268	0.0025110501542163874
23	ENSRNOG00000067701	-	4:161398170:161436055	-3.2944890130021376	3.132941245248272e-8
24	ENSRNOG00000067701	-	4:161398170:161436055	-3.2944890130021376	3.132941245248272e-8
25	ENSRNOG00000067701	-	4:161398170:161419446	-3.2944890130021376	3.132941245248272e-8
26	ENSRNOG00000067701	-	4:161399697:161446081	-3.2944890130021376	3.132941245248272e-8
27	MSTRG.4435	XLOC_007240	12:5871778:5949687	-3.20847286019781	1.1193978819479201e-10
28	ENSRNOG00000063463	-	5:136081970:136085690	-3.204076887212998	0.007886710371938324
29	ENSRNOG00000063463	-	5:136081970:136085690	-3.204076887212998	0.007886710371938324
30	MSTRG.9597	XLOC_016024	2:168264106:168292654	-3.203274354768392	1.121164246007944e-5
31	MSTRG.14772	XLOC_024659	6:28301242:28308915	-3.1938078872237075	4.3082184835898566e-7
32	ENSRNOG00000065394	-	1:31564:36478	-3.12428145633446	4.207125187594895e-12
33	MSTRG.13181	XLOC_021667	4:162250472:162263694	-2.806344664875727	0.001128264044360247
34	MSTRG.15404	XLOC_024512	6:137001537:137007920	-2.7882694045338376	5.5688041189720606e-5
35	ENSRNOG00000069144	-	15:35437656:35448392	-2.783182194129556	1.4253496503445945e-4
36	ENSRNOG00000069144	-	15:35437656:35446699	-2.783182194129556	1.4253496503445945e-4
37	ENSRNOG00000069144	-	15:35437656:35446699	-2.783182194129556	1.4253496503445945e-4
38	MSTRG.15606	XLOC_026299	7:10202464:10237455	-2.7344510608740373	2.0309115670353124e-8
39	ENSRNOG00000069426	-	20:26763850:26764944	-2.626369770246167	0.0038564402405672684
40	ENSRNOG00000065846	-	17:8578585:8627035	-2.560403566615449	3.768909665059859e-9
41	ENSRNOG00000068539	-	1:20229465:20235866	-2.5554338648911545	6.148273983677672e-6
42	ENSRNOG00000064568	-	3:115619632:115675892	-2.5488939056175	7.610708925053994e-10
43	ENSRNOG00000064568	-	3:115619780:115676557	-2.5488939056175	7.610708925053994e-10
44	ENSRNOG00000064568	-	3:115619780:115676557	-2.5488939056175	7.610708925053994e-10
45	ENSRNOG00000069051	-	14:83415689:83420637	-2.5034865413524496	6.44317764952559e-4
46	ENSRNOG00000069402	-	1:20235912:20250149	-2.471390700240863	1.897880232846196e-5
47	ENSRNOG00000069402	-	1:20235912:20238607	-2.471390700240863	1.897880232846196e-5
48	MSTRG.12916	XLOC_020561	4:125344786:125359968	-2.458868321571663	4.013270894997473e-5
49	ENSRNOG00000064699	-	18:54197827:54211426	-2.447164539556885	1.4994210941176916e-10
50	ENSRNOG00000064699	-	18:54197827:54210956	-2.447164539556885	1.4994210941176916e-10
51	ENSRNOG00000064699	-	18:54197873:54209943	-2.447164539556885	1.4994210941176916e-10
52	ENSRNOG00000069096	-	17:44826628:44843909	-2.4274341162876047	0.014362545886349694
53	ENSRNOG00000069096	-	17:44830172:44842694	-2.4274341162876047	0.014362545886349694
54	ENSRNOG00000054801	-	7:89067244:89129146	-2.4012693929852675	0.00960305133179684
55	MSTRG.17027	XLOC_027594	8:58374666:58407375	-2.281142077517498	5.022814403450316e-5
56	ENSRNOG00000051306	-	1:240204855:240245012	-2.2303396546167806	6.031995754947276e-8
57	ENSRNOG00000051306	-	1:240205008:240245055	-2.2303396546167806	6.031995754947276e-8
58	ENSRNOG00000051306	-	1:240223416:240244990	-2.2303396546167806	6.031995754947276e-8
59	ENSRNOG00000051306	-	1:240204987:240240272	-2.2303396546167806	6.031995754947276e-8
60	ENSRNOG00000051306	-	1:240234420:240245055	-2.2303396546167806	6.031995754947276e-8
61	ENSRNOG00000069674	-	10:54884768:54921688	-2.2192436567725977	2.2158937863148758e-8
62	ENSRNOG00000068121	-	18:30489217:30535722	-2.058732348652492	0.0020639460996558475
63	ENSRNOG00000068121	-	18:30489222:30568888	-2.058732348652492	0.0020639460996558475
64	ENSRNOG00000065697	-	9:105805421:105816652	-1.9466555981986287	6.281676573988351e-4
65	ENSRNOG00000065697	-	9:105808392:105816534	-1.9466555981986287	6.281676573988351e-4
66	ENSRNOG00000066075	-	6:57316295:57317897	-1.9245385101489305	8.439548238291955e-4
67	ENSRNOG00000066075	-	6:57316310:57317877	-1.9245385101489305	8.439548238291955e-4
68	ENSRNOG00000070155	-	3:139969967:139978285	-1.9095405633590476	0.0052280731161487015
69	ENSRNOG00000070155	-	3:139969967:139978285	-1.9095405633590476	0.0052280731161487015
70	ENSRNOG00000069611	-	3:15802470:15822182	-1.8582774355494698	0.001398121398604221
71	ENSRNOG00000069611	-	3:15818027:15821348	-1.8582774355494698	0.001398121398604221
72	ENSRNOG00000069611	-	3:15818410:15822182	-1.8582774355494698	0.001398121398604221
73	ENSRNOG00000070502	-	5:8978744:8981492	-1.8252840398757189	0.022709202290932894
74	MSTRG.7821	XLOC_012836	17:65994331:66033568	-1.8105099209652156	1.2036996134556938e-5
75	ENSRNOG00000003984	-	X:127203823:127213391	-1.7407930290972655	1.585500159303477e-7
76	ENSRNOG00000064337	-	17:66032603:66038403	-1.7342767711028186	1.0511729537627425e-4
77	ENSRNOG00000064337	-	17:66032603:66038403	-1.7342767711028186	1.0511729537627425e-4
78	ENSRNOG00000064337	-	17:66032603:66036279	-1.7342767711028186	1.0511729537627425e-4
79	ENSRNOG00000064337	-	17:66036059:66038403	-1.7342767711028186	1.0511729537627425e-4
80	ENSRNOG00000069161	-	17:66027501:66033568	-1.6832612585869393	9.551824728655593e-6
81	ENSRNOG00000067743	-	8:70033612:70034680	-1.662569232033545	1.0650385754100843e-6
82	ENSRNOG00000069295	-	2:182977556:182988080	-1.5381682035552329	0.03403707586050161
83	ENSRNOG00000069295	-	2:182980216:182988080	-1.5381682035552329	0.03403707586050161
84	ENSRNOG00000069295	-	2:182986395:182988080	-1.5381682035552329	0.03403707586050161
85	ENSRNOG00000065786	-	4:161494082:161495636	-1.493016662817473	6.063700005089632e-13
86	ENSRNOG00000068332	-	17:21500979:21504665	-1.4770312618963013	7.8386182775611e-5
87	ENSRNOG00000069594	-	4:59663609:59677970	-1.4734922182136543	0.02130107050552839
88	ENSRNOG00000069594	-	4:59670860:59690626	-1.4734922182136543	0.02130107050552839
89	ENSRNOG00000069594	-	4:59678023:59724004	-1.4734922182136543	0.02130107050552839
90	ENSRNOG00000070152	-	7:69474236:69535169	-1.3871728411245463	0.009570146388849477
91	ENSRNOG00000070152	-	7:69475035:69485177	-1.3871728411245463	0.009570146388849477
92	MSTRG.9561	XLOC_015983	2:153551798:153566410	-1.3852352747477363	0.018191627292089268
93	ENSRNOG00000063449	-	7:110021779:110033215	-1.335105141433654	0.02631057875298699
94	ENSRNOG00000063449	-	7:110024771:110033215	-1.335105141433654	0.02631057875298699
95	ENSRNOG00000063449	-	7:110031095:110033215	-1.335105141433654	0.02631057875298699
96	ENSRNOG00000070930	-	4:57871110:57874557	-1.295371276222539	4.928857256323714e-4
97	ENSRNOG00000068968	-	17:18728211:18736141	-1.2936467351507979	0.013356177710783297
98	ENSRNOG00000068968	-	17:18729077:18736638	-1.2936467351507979	0.013356177710783297
99	MSTRG.1346	XLOC_003055	1:159220320:159231257	-1.2147889012742135	0.04281927213390502
100	ENSRNOG00000065163	-	3:36878660:36880280	-1.200638099998847	4.9765914205883285e-6
101	ENSRNOG00000064499	-	20:11608891:11615676	-1.1904119676367653	9.483848071186174e-4
102	ENSRNOG00000064499	-	20:11609023:11615676	-1.1904119676367653	9.483848071186174e-4
103	ENSRNOG00000064499	-	20:11610642:11614165	-1.1904119676367653	9.483848071186174e-4
104	ENSRNOG00000064548	-	1:174509578:174512308	-1.1609550832157591	0.005406157767984428
105	ENSRNOG00000066884	-	3:149239559:149275979	-1.1125471932161322	0.01968157369504602
106	ENSRNOG00000068224	-	3:44333774:44337077	-1.1105871638788833	4.504120370316005e-6
107	ENSRNOG00000063179	-	14:42054617:42113743	-1.1093220537066821	0.00436903829589796
108	ENSRNOG00000065998	-	X:32891490:32892962	-1.1057328321031488	2.5564475777123758e-5
109	MSTRG.17017	XLOC_027584	8:57909160:57913653	-1.1008364672335398	0.007227740497059904
110	ENSRNOG00000071119	-	2:182795382:182809751	-1.0515211047135447	4.5328164988925684e-7
111	ENSRNOG00000071119	-	2:182795694:182809451	-1.0515211047135447	4.5328164988925684e-7
112	ENSRNOG00000071119	-	2:182795790:182807796	-1.0515211047135447	4.5328164988925684e-7
113	ENSRNOG00000071119	-	2:182795801:182805476	-1.0515211047135447	4.5328164988925684e-7
114	ENSRNOG00000063594	-	5:104003369:104008178	-1.044586795723277	0.00313082585450576
115	ENSRNOG00000063706	-	2:54159664:54165214	-1.0215484104612684	0.011380969118487126
116	ENSRNOG00000064826	-	2:173598394:173604419	1.0081386544854376	0.004725523102765084
117	ENSRNOG00000069541	-	5:123530978:123534173	1.0109916339249707	0.030663972468791458
118	ENSRNOG00000067105	-	X:68570839:68636429	1.0198320372029117	2.6070843051818974e-5
119	ENSRNOG00000067105	-	X:68584314:68603142	1.0198320372029117	2.6070843051818974e-5
120	ENSRNOG00000067105	-	X:68584507:68619937	1.0198320372029117	2.6070843051818974e-5
121	ENSRNOG00000067105	-	X:68584895:68599449	1.0198320372029117	2.6070843051818974e-5
122	ENSRNOG00000067105	-	X:68586757:68636429	1.0198320372029117	2.6070843051818974e-5
123	ENSRNOG00000065346	-	1:127609383:127628539	1.0325551227546197	7.189524950226119e-6
124	ENSRNOG00000065346	-	1:127620834:127628539	1.0325551227546197	7.189524950226119e-6
125	ENSRNOG00000067004	-	2:91935414:92030033	1.0341274284002095	0.030632307896958165
126	ENSRNOG00000067290	-	4:132154423:132211074	1.0461243729526213	0.0017644274863200516
127	ENSRNOG00000067290	-	4:132154423:132209360	1.0461243729526213	0.0017644274863200516
128	ENSRNOG00000067290	-	4:132154423:132190607	1.0461243729526213	0.0017644274863200516
129	ENSRNOG00000067290	-	4:132154423:132190607	1.0461243729526213	0.0017644274863200516
130	ENSRNOG00000067290	-	4:132169500:132190607	1.0461243729526213	0.0017644274863200516
131	ENSRNOG00000062374	-	1:135164303:135165593	1.0577963108598767	0.02423768991134442
132	ENSRNOG00000062871	-	14:4458688:4487530	1.059174491409706	5.036267858177855e-8
133	ENSRNOG00000062871	-	14:4479492:4487223	1.059174491409706	5.036267858177855e-8
134	ENSRNOG00000062871	-	14:4481427:4487530	1.059174491409706	5.036267858177855e-8
135	ENSRNOG00000062871	-	14:4482932:4487506	1.059174491409706	5.036267858177855e-8
136	ENSRNOG00000067595	-	8:41755488:41775628	1.0790185359936755	0.006144404900869461
137	ENSRNOG00000067595	-	8:41761393:41897789	1.0790185359936755	0.006144404900869461
138	ENSRNOG00000067595	-	8:41761393:41775628	1.0790185359936755	0.006144404900869461
139	ENSRNOG00000067595	-	8:41848974:41902911	1.0790185359936755	0.006144404900869461
140	ENSRNOG00000067595	-	8:41897801:41902911	1.0790185359936755	0.006144404900869461
141	ENSRNOG00000063238	-	2:209823763:209826790	1.079288114277849	0.038883305821123905
142	ENSRNOG00000063348	-	13:73555081:73559792	1.0903046056354564	0.007028310524486513
143	ENSRNOG00000071185	-	4:78274962:78293658	1.0946879437646166	7.637204204164703e-4
144	ENSRNOG00000066588	-	11:30683524:30696037	1.1231604232689878	0.03269526505269357
145	ENSRNOG00000066588	-	11:30683524:30696037	1.1231604232689878	0.03269526505269357
146	ENSRNOG00000063209	-	14:100051498:100054667	1.1377059403495895	4.615968261692828e-4
147	ENSRNOG00000063209	-	14:100052279:100054667	1.1377059403495895	4.615968261692828e-4
148	ENSRNOG00000064366	-	12:38567761:38569918	1.1491545616205292	0.019556611658832778
149	ENSRNOG00000066031	-	8:5200351:5206759	1.1499910952872008	0.0030918734539717094
150	ENSRNOG00000066031	-	8:5200351:5206113	1.1499910952872008	0.0030918734539717094
151	ENSRNOG00000062746	-	2:210385869:210394094	1.1510776358464265	0.002181880720222486
152	ENSRNOG00000062746	-	2:210385869:210393337	1.1510776358464265	0.002181880720222486
153	ENSRNOG00000062746	-	2:210385869:210393337	1.1510776358464265	0.002181880720222486
154	ENSRNOG00000062746	-	2:210385869:210392943	1.1510776358464265	0.002181880720222486
155	ENSRNOG00000062746	-	2:210387096:210393337	1.1510776358464265	0.002181880720222486
156	ENSRNOG00000063760	-	7:132354681:132359869	1.1514623410509517	0.0018544282836670317
157	ENSRNOG00000063760	-	7:132354681:132357229	1.1514623410509517	0.0018544282836670317
158	ENSRNOG00000063993	-	16:36104701:36157250	1.155544424219337	5.049594126385713e-6
159	ENSRNOG00000063993	-	16:36118650:36157250	1.155544424219337	5.049594126385713e-6
160	ENSRNOG00000063993	-	16:36120420:36157250	1.155544424219337	5.049594126385713e-6
161	ENSRNOG00000065376	-	3:156392971:156394687	1.1575743691836395	0.0010651454917295965
162	ENSRNOG00000067151	-	10:49833365:49835784	1.1595785401006673	6.171796386076577e-4
163	ENSRNOG00000067835	-	12:35662951:35668551	1.1638672224287956	4.3802606671714927e-7
164	ENSRNOG00000066189	-	7:95726722:95741941	1.1796047293640595	0.033750982445594324
165	ENSRNOG00000001277	-	12:14833984:14837048	1.180561653225203	5.170630261810699e-4
166	MSTRG.1333	XLOC_001050	1:158057045:158061927	1.2048532639834755	0.006200494420762828
167	ENSRNOG00000019857	-	7:8697521:8761240	1.208414230063933	0.0010599481651565245
168	ENSRNOG00000019857	-	7:8697530:8761240	1.208414230063933	0.0010599481651565245
169	ENSRNOG00000019857	-	7:8711521:8761240	1.208414230063933	0.0010599481651565245
170	ENSRNOG00000019857	-	7:8714843:8761240	1.208414230063933	0.0010599481651565245
171	ENSRNOG00000064438	-	7:17011814:17030581	1.211991582280481	0.0020756558175766084
172	ENSRNOG00000064438	-	7:17015191:17018525	1.211991582280481	0.0020756558175766084
173	ENSRNOG00000067408	-	8:34684180:34715465	1.2155748741903354	0.0341431349433856
174	ENSRNOG00000067408	-	8:34684728:34715465	1.2155748741903354	0.0341431349433856
175	ENSRNOG00000067235	-	2:110859374:110863752	1.2427161323986582	0.016620136366599557
176	ENSRNOG00000067921	-	6:132029960:132032195	1.2875650624502735	2.3424081797512368e-4
177	ENSRNOG00000071003	-	1:258560051:258562841	1.3165950583685373	0.003887729237985481
178	ENSRNOG00000063870	-	4:162969362:162973039	1.3175534300904683	0.03806289897265085
179	MSTRG.12581	XLOC_020231	4:78274406:78294100	1.338223399240771	1.0951057125783978e-4
180	ENSRNOG00000066818	-	1:39289190:39322960	1.3456367121259591	0.040590054784804534
181	ENSRNOG00000066818	-	1:39289190:39305184	1.3456367121259591	0.040590054784804534
182	ENSRNOG00000066818	-	1:39289190:39305184	1.3456367121259591	0.040590054784804534
183	ENSRNOG00000066818	-	1:39289223:39330338	1.3456367121259591	0.040590054784804534
184	ENSRNOG00000066818	-	1:39289434:39303020	1.3456367121259591	0.040590054784804534
185	ENSRNOG00000061154	-	8:38216248:38251112	1.3633086729598043	0.006791784137547917
186	ENSRNOG00000061154	-	8:38216248:38218386	1.3633086729598043	0.006791784137547917
187	ENSRNOG00000061154	-	8:38246415:38251112	1.3633086729598043	0.006791784137547917
188	ENSRNOG00000061154	-	8:38246448:38262500	1.3633086729598043	0.006791784137547917
189	ENSRNOG00000064277	-	1:154032905:154040564	1.374290892100374	8.807347400548201e-4
190	ENSRNOG00000064277	-	1:154036406:154040564	1.374290892100374	8.807347400548201e-4
191	ENSRNOG00000063556	-	9:59008776:59040615	1.4010776691663351	0.026771300774597974
192	ENSRNOG00000063556	-	9:59008815:59040615	1.4010776691663351	0.026771300774597974
193	ENSRNOG00000063556	-	9:59008823:59040592	1.4010776691663351	0.026771300774597974
194	ENSRNOG00000063556	-	9:59008825:59040615	1.4010776691663351	0.026771300774597974
195	ENSRNOG00000063556	-	9:59009785:59040592	1.4010776691663351	0.026771300774597974
196	MSTRG.5149	XLOC_008630	13:45843942:45854564	1.4130509217271057	0.02462521869647332
197	ENSRNOG00000066622	-	7:62784299:62787126	1.429286774985165	0.012180413815470132
198	ENSRNOG00000063392	-	X:107116499:107164984	1.4770471223087525	0.010132338374993
199	ENSRNOG00000067047	-	X:645177:647888	1.4970535503491946	7.484718105790829e-7
200	ENSRNOG00000069560	-	19:17946982:18006848	1.5002293631108405	0.004807049712449735
201	ENSRNOG00000069560	-	19:17946982:17986902	1.5002293631108405	0.004807049712449735
202	ENSRNOG00000069560	-	19:17947039:17974901	1.5002293631108405	0.004807049712449735
203	ENSRNOG00000069560	-	19:17948254:17986902	1.5002293631108405	0.004807049712449735
204	ENSRNOG00000068040	-	2:194936667:194939784	1.534595297239581	0.00919776047957084
205	ENSRNOG00000054311	-	12:36918224:36920511	1.5445321267155088	5.667697680805969e-6
206	ENSRNOG00000069705	-	16:46842387:46854011	1.556835016880423	3.9279459214638896e-4
207	ENSRNOG00000069705	-	16:46842472:46853172	1.556835016880423	3.9279459214638896e-4
208	ENSRNOG00000069705	-	16:46842472:46853172	1.556835016880423	3.9279459214638896e-4
209	MSTRG.19006	XLOC_030673	X:107587293:107592767	1.6187061334915462	0.007719702307833316
210	MSTRG.5534	XLOC_008905	13:96593844:96660616	1.6939950793705483	0.007687079053463105
211	ENSRNOG00000063513	-	18:28322996:28324304	1.7459185282487908	1.2432262123800899e-8
212	ENSRNOG00000063634	-	18:28318495:28321583	1.7477728860390567	9.76816166375718e-19
213	ENSRNOG00000068246	-	3:18372888:18387230	1.802550938716072	2.0072558954400605e-4
214	ENSRNOG00000068246	-	3:18377481:18387230	1.802550938716072	2.0072558954400605e-4
215	MSTRG.2148	XLOC_001708	1:231033377:231043141	1.8973795130051871	1.6351187505664693e-4
216	ENSRNOG00000070022	-	7:17177556:17190144	1.9060126725483093	6.911881764362912e-4
217	ENSRNOG00000070022	-	7:17177556:17181897	1.9060126725483093	6.911881764362912e-4
218	ENSRNOG00000070022	-	7:17184411:17192039	1.9060126725483093	6.911881764362912e-4
219	ENSRNOG00000070022	-	7:17184411:17190108	1.9060126725483093	6.911881764362912e-4
220	ENSRNOG00000068008	-	6:124365829:124398449	2.0515833032161264	0.0036219537355556062
221	ENSRNOG00000062687	-	3:2881223:2887839	2.1488809415369188	0.014109825781695208
222	ENSRNOG00000062687	-	3:2881557:2901974	2.1488809415369188	0.014109825781695208
223	ENSRNOG00000070376	-	19:19550144:19608204	2.1506142374080373	0.0012832857903075224
224	ENSRNOG00000070376	-	19:19552413:19608115	2.1506142374080373	0.0012832857903075224
225	ENSRNOG00000070376	-	19:19552413:19608115	2.1506142374080373	0.0012832857903075224
226	ENSRNOG00000070376	-	19:19552576:19608206	2.1506142374080373	0.0012832857903075224
227	ENSRNOG00000070376	-	19:19558571:19608206	2.1506142374080373	0.0012832857903075224
228	ENSRNOG00000066049	-	7:107854715:107856810	2.2491858828655165	0.044200785988937785
229	ENSRNOG00000063579	-	13:43631977:43650173	2.254892429163836	1.3891417254403814e-12
230	ENSRNOG00000063579	-	13:43635982:43650173	2.254892429163836	1.3891417254403814e-12
231	ENSRNOG00000063579	-	13:43637330:43650173	2.254892429163836	1.3891417254403814e-12
232	ENSRNOG00000063579	-	13:43640351:43650173	2.254892429163836	1.3891417254403814e-12
233	ENSRNOG00000063579	-	13:43640549:43650173	2.254892429163836	1.3891417254403814e-12
234	ENSRNOG00000063579	-	13:43640642:43650173	2.254892429163836	1.3891417254403814e-12
235	ENSRNOG00000063579	-	13:43641778:43650173	2.254892429163836	1.3891417254403814e-12
236	ENSRNOG00000062838	-	9:76939062:76940321	2.5991129028235838	0.01615005489120796
237	ENSRNOG00000062838	-	9:76939062:76940321	2.5991129028235838	0.01615005489120796
238	ENSRNOG00000070554	-	1:23123683:23127067	2.648815359152849	0.03482882681199214
239	ENSRNOG00000070554	-	1:23123683:23125702	2.648815359152849	0.03482882681199214
240	ENSRNOG00000066873	-	7:107856907:107872448	2.826812816453124	3.6986477470620544e-5
241	ENSRNOG00000066873	-	7:107857234:107876038	2.826812816453124	3.6986477470620544e-5
242	ENSRNOG00000066873	-	7:107857260:107872448	2.826812816453124	3.6986477470620544e-5
243	MSTRG.10313	XLOC_017174	20:3747181:3749794	3.297702469815625	4.182456530327008e-6
