# Supplementary material for: Molecular Action of Tamoxifen in the Ovaries of Rats with Mammary Neoplasia
Source: Int J Mol Sci. 2023 Oct 30;24(21):15767. doi: 10.3390/ijms242115767 (PMC10649132; doi:10.3390/ijms242115767)
Supplement: Supplementary file 1 [file ijms-24-15767-s001.zip › supplementary/Table S8.xlsx]

## Sheet: Tab. S8
Supplementary Table S8. Target DEGs predicted to be potentially cis-regulated by DELs
No.	lncRNA	Number of target DEGs	Target DEGs	Number of negative correlated DEGs	List of negatively correlated DEGs	Number of positively correlated DEGs	List of positively correlated DEGs
1	ENSRNOG00000001277	7	Cebpb, Vipr2, Asic4, Akr1c13, ENSRNOG00000070639, Ly6g6e, Tmem184a	3	Cebpb, Vipr2, Akr1c13	4	Asic4, ENSRNOG00000070639, Ly6g6e, Tmem184a
2	ENSRNOG00000051306	11	Ldaf1, Rnls, Pik3ap1, Slc16a4, ENSRNOG00000070827, Adamts9, Cebpb, Sgcg, Akr1c13, Elmo1, Sall1	1	Sall1	10	Ldaf1, Rnls, Pik3ap1, Slc16a4, ENSRNOG00000070827, Adamts9, Cebpb, Sgcg, Akr1c13, Elmo1
3	ENSRNOG00000062838	8	Tead4, Adamts9, Rhbdl2, Tmprss6, Giot1, Rora, LOC102556277, Gfod1	7	Tead4, Adamts9, Rhbdl2, Tmprss6, Giot1, Rora, Gfod1	1	LOC102556277
4	ENSRNOG00000063449	2	ENSRNOG00000061379, Oas1d	1	Oas1d	1	ENSRNOG00000061379
5	ENSRNOG00000063463	6	ENSRNOG00000061379, Rhbdl2, Tmprss6, Cyp11a1, LOC102556277, Gfod1	1	LOC102556277	5	ENSRNOG00000061379, Rhbdl2, Tmprss6, Cyp11a1, Gfod1
6	ENSRNOG00000063579	29	Ldaf1, Rnls, Pik3ap1, ENSRNOG00000061379, Slc16a4, Hsd3b1, ENSRNOG00000070827, Adamts9, Arl5a, Fam102a, Cebpb, Cdkn2b, Rhbdl2, Tmprss6, Snx31, Giot1, ENSRNOG00000065187, Cyp11a1, Myocd, Slc16a11, Tns3, Sgcg, Akr1c13, Akr1c12, Elmo1, Cbln1, Sall1, Osgin1, ENSRNOG00000056298	25	Ldaf1, Rnls, Pik3ap1, ENSRNOG00000061379, Slc16a4, Hsd3b1, ENSRNOG00000070827, Adamts9, Arl5a, Fam102a, Cebpb, Cdkn2b, Rhbdl2, Tmprss6, Giot1, ENSRNOG00000065187, Cyp11a1, Slc16a11, Tns3, Sgcg, Akr1c13, Akr1c12, Elmo1, Osgin1, ENSRNOG00000056298	4	Snx31, Myocd, Cbln1, Sall1
7	ENSRNOG00000063594	11	Olr118-ps, ENSRNOG00000061379, Hsd3b1, Fam102a, Cdkn2b, Rhbdl2, Tmprss6, Giot1, Cyp11a1, Myocd, Oas1d	3	Olr118-ps, Myocd, Oas1d	8	ENSRNOG00000061379, Hsd3b1, Fam102a, Cdkn2b, Rhbdl2, Tmprss6, Giot1, Cyp11a1
8	ENSRNOG00000063706	9	ENSRNOG00000061379, Ppm1l, Tead4, Rhbdl2, Klhl29, Rora, Cyp11a1, LOC102556277, Tns3	1	LOC102556277	8	ENSRNOG00000061379, Ppm1l, Tead4, Rhbdl2, Klhl29, Rora, Cyp11a1, Tns3
9	ENSRNOG00000063993	21	Ldaf1, Ppm1l, Hsd3b1, ENSRNOG00000070827, Tead4, Arl5a, Cebpb, Giot1, Rora, ENSRNOG00000065187, Cyp11a1, Asic4, Myocd, Slc16a11, Tns3, Sgcg, Akr1c13, ENSRNOG00000070639, Osgin1, Oas1d, Tmem184a	16	Ldaf1, Ppm1l, Hsd3b1, ENSRNOG00000070827, Tead4, Arl5a, Cebpb, Giot1, Rora, ENSRNOG00000065187, Cyp11a1, Slc16a11, Tns3, Sgcg, Akr1c13, Osgin1	5	Asic4, Myocd, ENSRNOG00000070639, Oas1d, Tmem184a
10	ENSRNOG00000064277	1	Olr35	0	NA	1	Olr35
11	ENSRNOG00000064337	15	Ldaf1, Rnls, Pik3ap1, Slc16a4, ENSRNOG00000070827, Cdkn2b, Snx31, ENSRNOG00000065187, Slc16a11, Sgcg, Akr1c13, Elmo1, Sall1, Osgin1, ENSRNOG00000056298	2	Snx31, Sall1	13	Ldaf1, Rnls, Pik3ap1, Slc16a4, ENSRNOG00000070827, Cdkn2b, ENSRNOG00000065187, Slc16a11, Sgcg, Akr1c13, Elmo1, Osgin1, ENSRNOG00000056298
12	ENSRNOG00000064548	9	Ldaf1, Bnipl, Ppm1l, ENSRNOG00000070827, Tead4, Rora, Tns3, ENSRNOG00000070639, Sall1	3	Bnipl, ENSRNOG00000070639, Sall1	6	Ldaf1, Ppm1l, ENSRNOG00000070827, Tead4, Rora, Tns3
13	ENSRNOG00000065163	23	Rnls, Pik3ap1, Olr118-ps, ENSRNOG00000061379, Slc16a4, Hsd3b1, ENSRNOG00000070827, Arl5a, Fam102a, Cebpb, Cdkn2b, Giot1, ENSRNOG00000065187, Myocd, Slc16a11, Sgcg, Akr1c12, Elmo1, Cbln1, Osgin1, ENSRNOG00000056298, Oas1d, Tmem184a	5	Olr118-ps, Myocd, Cbln1, Oas1d, Tmem184a	18	Rnls, Pik3ap1, ENSRNOG00000061379, Slc16a4, Hsd3b1, ENSRNOG00000070827, Arl5a, Fam102a, Cebpb, Cdkn2b, Giot1, ENSRNOG00000065187, Slc16a11, Sgcg, Akr1c12, Elmo1, Osgin1, ENSRNOG00000056298
14	ENSRNOG00000065376	16	Rnls, Pik3ap1, Slc16a4, Hsd3b1, Arl5a, Fam102a, Cebpb, Myocd, Slc16a11, Sgcg, Akr1c13, Akr1c12, Elmo1, Cbln1, Osgin1, ENSRNOG00000056298	14	Rnls, Pik3ap1, Slc16a4, Hsd3b1, Arl5a, Fam102a, Cebpb, Slc16a11, Sgcg, Akr1c13, Akr1c12, Elmo1, Osgin1, ENSRNOG00000056298	2	Myocd, Cbln1
15	ENSRNOG00000065786	27	Ldaf1, Pik3ap1, ENSRNOG00000061379, Ppm1l, Hsd3b1, ENSRNOG00000070827, Tead4, Adamts9, Arl5a, Fam102a, Cebpb, Cdkn2b, Rhbdl2, Vipr2, Tmprss6, Giot1, Rora, Cyp11a1, Slc16a11, LOC102556277, Tns3, Sgcg, Elmo1, Cbln1, Osgin1, Oas1d, Tmem184a	4	LOC102556277, Cbln1, Oas1d, Tmem184a	23	Ldaf1, Pik3ap1, ENSRNOG00000061379, Ppm1l, Hsd3b1, ENSRNOG00000070827, Tead4, Adamts9, Arl5a, Fam102a, Cebpb, Cdkn2b, Rhbdl2, Vipr2, Tmprss6, Giot1, Rora, Cyp11a1, Slc16a11, Tns3, Sgcg, Elmo1, Osgin1
16	ENSRNOG00000067151	17	Olr118-ps, ENSRNOG00000061379, Ppm1l, Hsd3b1, Arl5a, Fam102a, Cebpb, Cdkn2b, Giot1, Cyp11a1, Myocd, Slc16a11, Tns3, Akr1c12, Osgin1, Oas1d, Tmem184a	13	ENSRNOG00000061379, Ppm1l, Hsd3b1, Arl5a, Fam102a, Cebpb, Cdkn2b, Giot1, Cyp11a1, Slc16a11, Tns3, Akr1c12, Osgin1	4	Olr118-ps, Myocd, Oas1d, Tmem184a
17	ENSRNOG00000067729	4	Tmprss6, Giot1, Rora, Gfod1	0	NA	4	Tmprss6, Giot1, Rora, Gfod1
18	ENSRNOG00000067743	27	Ldaf1, Pik3ap1, ENSRNOG00000061379, Ppm1l, Hsd3b1, ENSRNOG00000070827, Tead4, Adamts9, Arl5a, Fam102a, Cebpb, Cdkn2b, Rhbdl2, Tmprss6, Giot1, Rora, ENSRNOG00000065187, Cyp11a1, Myocd, Slc16a11, Tns3, Sgcg, Akr1c12, Elmo1, Cbln1, Osgin1, Oas1d	3	Myocd, Cbln1, Oas1d	24	Ldaf1, Pik3ap1, ENSRNOG00000061379, Ppm1l, Hsd3b1, ENSRNOG00000070827, Tead4, Adamts9, Arl5a, Fam102a, Cebpb, Cdkn2b, Rhbdl2, Tmprss6, Giot1, Rora, ENSRNOG00000065187, Cyp11a1, Slc16a11, Tns3, Sgcg, Akr1c12, Elmo1, Osgin1
19	ENSRNOG00000067835	31	Ldaf1, Pik3ap1, Olr118-ps, ENSRNOG00000061379, Ppm1l, Slc16a4, Hsd3b1, ENSRNOG00000070827, Tead4, Arl5a, Fam102a, Cebpb, Cdkn2b, Tmprss6, Giot1, Rora, ENSRNOG00000065187, Cyp11a1, Asic4, Myocd, Slc16a11, Tns3, Sgcg, Akr1c13, Akr1c12, Elmo1, ENSRNOG00000070639, Cbln1, Osgin1, Oas1d, Tmem184a	24	Ldaf1, Pik3ap1, ENSRNOG00000061379, Ppm1l, Slc16a4, Hsd3b1, ENSRNOG00000070827, Tead4, Arl5a, Fam102a, Cebpb, Cdkn2b, Tmprss6, Giot1, Rora, ENSRNOG00000065187, Cyp11a1, Slc16a11, Tns3, Sgcg, Akr1c13, Akr1c12, Elmo1, Osgin1	7	Olr118-ps, Asic4, Myocd, ENSRNOG00000070639, Cbln1, Oas1d, Tmem184a
20	ENSRNOG00000068040	1	ENSRNOG00000061379	1	ENSRNOG00000061379	NA	NA
21	ENSRNOG00000068332	5	Rhbdl2, Tmprss6, Giot1, LOC102556277, Gfod1	1	LOC102556277	4	Rhbdl2, Tmprss6, Giot1, Gfod1
22	ENSRNOG00000069051	11	ENSRNOG00000061379, Hsd3b1, Tead4, Cdkn2b, Rhbdl2, Tmprss6, Giot1, Rora, Cyp11a1, LOC102556277, Gfod1	1	LOC102556277	10	ENSRNOG00000061379, Hsd3b1, Tead4, Cdkn2b, Rhbdl2, Tmprss6, Giot1, Rora, Cyp11a1, Gfod1
23	ENSRNOG00000069096	2	Lrat, Sgcg	0	NA	2	Lrat, Sgcg
24	ENSRNOG00000069144	8	Ldaf1, Pik3ap1, Slc16a4, ENSRNOG00000070827, Sgcg, Akr1c13, Elmo1, Sall1	1	Sall1	7	Ldaf1, Pik3ap1, Slc16a4, ENSRNOG00000070827, Sgcg, Akr1c13, Elmo1
25	ENSRNOG00000069161	24	Ldaf1, Pik3ap1, ENSRNOG00000061379, Hsd3b1, ENSRNOG00000070827, Tead4, Adamts9, Arl5a, Fam102a, Cebpb, Cdkn2b, Rhbdl2, Tmprss6, Giot1, Rora, ENSRNOG00000065187, Cyp11a1, Myocd, Slc16a11, Sgcg, Akr1c12, Elmo1, Osgin1, Oas1d	2	Myocd, Oas1d	22	Ldaf1, Pik3ap1, ENSRNOG00000061379, Hsd3b1, ENSRNOG00000070827, Tead4, Adamts9, Arl5a, Fam102a, Cebpb, Cdkn2b, Rhbdl2, Tmprss6, Giot1, Rora, ENSRNOG00000065187, Cyp11a1, Slc16a11, Sgcg, Akr1c12, Elmo1, Osgin1
26	ENSRNOG00000069426	19	Hsd3b1, ENSRNOG00000070827, Arl5a, Fam102a, Cebpb, Cdkn2b, Giot1, Rora, ENSRNOG00000065187, Myocd, Slc16a11, Sgcg, Akr1c12, Elmo1, Cbln1, Osgin1, ENSRNOG00000056298, Oas1d, Tmem184a	4	Myocd, Cbln1, Oas1d, Tmem184a	15	Hsd3b1, ENSRNOG00000070827, Arl5a, Fam102a, Cebpb, Cdkn2b, Giot1, Rora, ENSRNOG00000065187, Slc16a11, Sgcg, Akr1c12, Elmo1, Osgin1, ENSRNOG00000056298
27	ENSRNOG00000069560	5	ENSRNOG00000070827, Rora, ENSRNOG00000070639, Ly6g6e, Tmem184a	2	ENSRNOG00000070827, Rora	3	ENSRNOG00000070639, Ly6g6e, Tmem184a
28	ENSRNOG00000069611	16	ENSRNOG00000061379, Ppm1l, Hsd3b1, Tead4, Arl5a, Fam102a, Cebpb, Cdkn2b, Rhbdl2, Tmprss6, Giot1, Rora, Cyp11a1, Slc16a11, Oas1d, Tmem184a	2	Oas1d, Tmem184a	14	ENSRNOG00000061379, Ppm1l, Hsd3b1, Tead4, Arl5a, Fam102a, Cebpb, Cdkn2b, Rhbdl2, Tmprss6, Giot1, Rora, Cyp11a1, Slc16a11
29	ENSRNOG00000069674	25	Ldaf1, Rnls, Pik3ap1, Lrat, Slc16a4, Hsd3b1, ENSRNOG00000070827, Adamts9, Arl5a, Fam102a, Cebpb, Cdkn2b, ENSRNOG00000065187, Asic4, Slc16a11, Sgcg, Akr1c13, Akr1c12, Elmo1, Cbln1, Sall1, Osgin1, Ly6g6e, ENSRNOG00000056298, Tmem184a	5	Asic4, Cbln1, Sall1, Ly6g6e, Tmem184a	20	Ldaf1, Rnls, Pik3ap1, Lrat, Slc16a4, Hsd3b1, ENSRNOG00000070827, Adamts9, Arl5a, Fam102a, Cebpb, Cdkn2b, ENSRNOG00000065187, Slc16a11, Sgcg, Akr1c13, Akr1c12, Elmo1, Osgin1, ENSRNOG00000056298
30	ENSRNOG00000070376	20	Rnls, Pik3ap1, ENSRNOG00000061379, Hsd3b1, Adamts9, Arl5a, Fam102a, Cebpb, Cdkn2b, Tmprss6, Giot1, ENSRNOG00000065187, Myocd, Slc16a11, Sgcg, Akr1c12, Elmo1, Cbln1, Osgin1, Oas1d	17	Rnls, Pik3ap1, ENSRNOG00000061379, Hsd3b1, Adamts9, Arl5a, Fam102a, Cebpb, Cdkn2b, Tmprss6, Giot1, ENSRNOG00000065187, Slc16a11, Sgcg, Akr1c12, Elmo1, Osgin1	3	Myocd, Cbln1, Oas1d
31	ENSRNOG00000070797	11	Ldaf1, Ppm1l, Slc16a4, ENSRNOG00000070827, Klhl29, Cyp11a1, Asic4, Slc16a11, Tns3, Akr1c13, Osgin1	1	Asic4	10	Ldaf1, Ppm1l, Slc16a4, ENSRNOG00000070827, Klhl29, Cyp11a1, Slc16a11, Tns3, Akr1c13, Osgin1
32	ENSRNOG00000071119	10	Tead4, Adamts9, Rhbdl2, Vipr2, Tmprss6, Giot1, Rora, Cyp11a1, Gfod1, Tmem184a	1	Tmem184a	9	Tead4, Adamts9, Rhbdl2, Vipr2, Tmprss6, Giot1, Rora, Cyp11a1, Gfod1
33	ENSRNOG00000071212	11	Olr118-ps, Ppm1l, Slc16a4, Arl5a, Klhl29, Asic4, Slc16a11, Tns3, Sgcg, Akr1c13, Osgin1	2	Olr118-ps, Asic4	9	Ppm1l, Slc16a4, Arl5a, Klhl29, Slc16a11, Tns3, Sgcg, Akr1c13, Osgin1
34	MSTRG.10313	2	Olr35, Ly6g6e	0	NA	2	Olr35, Ly6g6e
35	MSTRG.12916	5	Rnls, Lrat, Sgcg, Akr1c13, ENSRNOG00000056298	0	NA	5	Rnls, Lrat, Sgcg, Akr1c13, ENSRNOG00000056298
36	MSTRG.13181	7	Adamts9, Fam102a, Cebpb, Sgcg, Elmo1, Cbln1, Ly6g6e	2	Cbln1, Ly6g6e	5	Adamts9, Fam102a, Cebpb, Sgcg, Elmo1
37	MSTRG.1333	5	Olr118-ps, Ppm1l, Klhl29, Asic4, Tns3	3	Ppm1l, Klhl29, Tns3	2	Olr118-ps, Asic4
38	MSTRG.14772	9	Olr118-ps, ENSRNOG00000061379, Ppm1l, Tead4, Rhbdl2, Klhl29, Tmprss6, Cyp11a1, Tns3	1	Olr118-ps	8	ENSRNOG00000061379, Ppm1l, Tead4, Rhbdl2, Klhl29, Tmprss6, Cyp11a1, Tns3
39	MSTRG.15404	5	Rnls, Lrat, Sgcg, Akr1c13, Ly6g6e	1	Ly6g6e	4	Rnls, Lrat, Sgcg, Akr1c13
40	MSTRG.15606	19	Olr118-ps, ENSRNOG00000061379, Ppm1l, Hsd3b1, Tead4, Arl5a, Fam102a, Cebpb, Cdkn2b, Tmprss6, Giot1, Rora, Cyp11a1, Myocd, Slc16a11, Tns3, Osgin1, Oas1d, Tmem184a	4	Olr118-ps, Myocd, Oas1d, Tmem184a	15	ENSRNOG00000061379, Ppm1l, Hsd3b1, Tead4, Arl5a, Fam102a, Cebpb, Cdkn2b, Tmprss6, Giot1, Rora, Cyp11a1, Slc16a11, Tns3, Osgin1
41	MSTRG.17017	7	Rnls, Pik3ap1, Slc16a4, ENSRNOG00000065187, Sgcg, Elmo1, ENSRNOG00000056298	0	NA	7	Rnls, Pik3ap1, Slc16a4, ENSRNOG00000065187, Sgcg, Elmo1, ENSRNOG00000056298
42	MSTRG.17027	8	Olr118-ps, ENSRNOG00000061379, Ppm1l, Hsd3b1, Klhl29, Cyp11a1, Tns3, Oas1d	2	Olr118-ps, Oas1d	6	ENSRNOG00000061379, Ppm1l, Hsd3b1, Klhl29, Cyp11a1, Tns3
43	MSTRG.2148	21	Rnls, Olr118-ps, ENSRNOG00000061379, Slc16a4, Hsd3b1, Arl5a, Fam102a, Cebpb, Cdkn2b, Vipr2, Tmprss6, Giot1, Cyp11a1, Myocd, Slc16a11, Sgcg, Akr1c12, Cbln1, Osgin1, ENSRNOG00000056298, Oas1d	17	Rnls, ENSRNOG00000061379, Slc16a4, Hsd3b1, Arl5a, Fam102a, Cebpb, Cdkn2b, Vipr2, Tmprss6, Giot1, Cyp11a1, Slc16a11, Sgcg, Akr1c12, Osgin1, ENSRNOG00000056298	4	Olr118-ps, Myocd, Cbln1, Oas1d
44	MSTRG.7821	23	Pik3ap1, ENSRNOG00000061379, Hsd3b1, ENSRNOG00000070827, Tead4, Adamts9, Arl5a, Fam102a, Cebpb, Cdkn2b, Tmprss6, Giot1, Rora, ENSRNOG00000065187, Cyp11a1, Myocd, Slc16a11, Sgcg, Akr1c12, Elmo1, Cbln1, Osgin1, Oas1d	3	Myocd, Cbln1, Oas1d	20	Pik3ap1, ENSRNOG00000061379, Hsd3b1, ENSRNOG00000070827, Tead4, Adamts9, Arl5a, Fam102a, Cebpb, Cdkn2b, Tmprss6, Giot1, Rora, ENSRNOG00000065187, Cyp11a1, Slc16a11, Sgcg, Akr1c12, Elmo1, Osgin1
45	MSTRG.9597	5	Lrat, Arl5a, Sgcg, Osgin1, ENSRNOG00000056298	0	NA	5	Lrat, Arl5a, Sgcg, Osgin1, ENSRNOG00000056298
46	MSTRG.9891	25	Ldaf1, Pik3ap1, Olr118-ps, ENSRNOG00000061379, Ppm1l, Slc16a4, Hsd3b1, ENSRNOG00000070827, Tead4, Arl5a, Cebpb, Cdkn2b, Klhl29, Tmprss6, Giot1, Cyp11a1, Asic4, Myocd, Slc16a11, Tns3, Sgcg, Akr1c13, Elmo1, Sall1, Osgin1	4	Olr118-ps, Asic4, Myocd, Sall1	21	Ldaf1, Pik3ap1, ENSRNOG00000061379, Ppm1l, Slc16a4, Hsd3b1, ENSRNOG00000070827, Tead4, Arl5a, Cebpb, Cdkn2b, Klhl29, Tmprss6, Giot1, Cyp11a1, Slc16a11, Tns3, Sgcg, Akr1c13, Elmo1, Osgin1
