# Supplementary material for: Molecular Action of Tamoxifen in the Ovaries of Rats with Mammary Neoplasia
Source: Int J Mol Sci. 2023 Oct 30;24(21):15767. doi: 10.3390/ijms242115767 (PMC10649132; doi:10.3390/ijms242115767)
Supplement: Supplementary file 1 [file ijms-24-15767-s001.zip › supplementary/Table S9.xlsx]

## Sheet: Tab. S9
Supplementary Table S9. Functional enrichment analysis (GO) of the co-expressed cis-target genes predicted to be regulated by differentially expressed lncRNAs identified in the ovaries of tumor-bearing rats treated with tamoxifen
No.	GO term ID	Term category	Description	P-adjusted	Number of DEGs enriched to particular GO term	List of DEGs enriched to the particular GO term
1	GO:0018879	BP	biphenyl metabolic process	0.0440449519989353	2	Hsd3b1, Cyp11a1
2	GO:0018894	BP	dibenzo-p-dioxin metabolic process	0.0440449519989353	2	Hsd3b1, Cyp11a1
3	GO:0061370	BP	testosterone biosynthetic process	0.0440449519989353	2	Hsd3b1, Cyp11a1
4	GO:0016229	MF	steroid dehydrogenase activity	0.0440449519989353	3	Hsd3b1, Akr1c13, Akr1c12
5	GO:0047086	MF	ketosteroid monooxygenase activity	0.0440449519989353	2	Akr1c13, Akr1c12
