# Supplementary material for: Molecular Action of Tamoxifen in the Ovaries of Rats with Mammary Neoplasia
Source: Int J Mol Sci. 2023 Oct 30;24(21):15767. doi: 10.3390/ijms242115767 (PMC10649132; doi:10.3390/ijms242115767)
Supplement: Supplementary file 1 [file ijms-24-15767-s001.zip › supplementary/Table S10.xlsx]

## Sheet: Tab. S10
Supplementary Table S10. The Pearson correlation between expression patterns of trans-regulated DEGs and DELs identified in the ovaries of tumor-bearing rats treated with tamoxifen
No.	DELs	DEGs	Pearson correlation	P-value
1	ENSRNOG00000067151	ENSRNOG00000042607	-0.9987827515795693	9.922443355847577e-8
2	ENSRNOG00000063209	ENSRNOG00000017434	-0.9983863821297546	2.0071510320462949e-7
3	ENSRNOG00000066622	ENSRNOG00000020994	-0.9981019082443332	3.011654157170085e-7
4	ENSRNOG00000063579	ENSRNOG00000015857	-0.9979096118457191	3.832963297867309e-7
5	ENSRNOG00000065163	ENSRNOG00000024602	-0.997514255477042	5.909034079820685e-7
6	MSTRG.2148	ENSRNOG00000015865	-0.9974535816778852	6.27603728098336e-7
7	ENSRNOG00000063579	ENSRNOG00000001242	-0.9974132854850721	6.527141160894701e-7
8	ENSRNOG00000066622	ENSRNOG00000026036	-0.9972798155565057	7.401445669685813e-7
9	ENSRNOG00000062838	ENSRNOG00000070111	-0.997243994665249	7.647376409902762e-7
10	ENSRNOG00000063579	ENSRNOG00000012156	-0.9972345715552622	7.712873384413399e-7
11	ENSRNOG00000066622	ENSRNOG00000003967	-0.9970629969231662	8.964605542338688e-7
12	ENSRNOG00000066622	ENSRNOG00000019990	-0.9969973523353918	9.473617121891209e-7
13	ENSRNOG00000067835	ENSRNOG00000047459	-0.9969903904959206	9.528590112495294e-7
14	ENSRNOG00000063348	ENSRNOG00000006735	-0.9967987055757409	1.1117897669166155e-6
15	ENSRNOG00000066622	ENSRNOG00000070362	-0.9966514889047344	1.2439522021345795e-6
16	ENSRNOG00000066622	ENSRNOG00000002425	-0.9966010155919635	1.291324859931109e-6
17	ENSRNOG00000063579	ENSRNOG00000045686	-0.9965164291347196	1.3731073833511687e-6
18	ENSRNOG00000063348	ENSRNOG00000042094	-0.9963702936614282	1.5215546720348527e-6
19	ENSRNOG00000062838	ENSRNOG00000071113	-0.9963430683030166	1.5502245747089916e-6
20	ENSRNOG00000063348	ENSRNOG00000015052	-0.9962100042207649	1.6949945775834863e-6
21	MSTRG.13181	ENSRNOG00000019416	-0.9962016511277312	1.7043417401829686e-6
22	ENSRNOG00000067835	ENSRNOG00000002408	-0.9961734236818531	1.7361567139495548e-6
23	ENSRNOG00000066622	ENSRNOG00000058497	-0.9961567388361575	1.7551281512595551e-6
24	ENSRNOG00000066622	ENSRNOG00000015052	-0.9961442714468488	1.7693848857192052e-6
25	ENSRNOG00000063209	ENSRNOG00000042189	-0.9959579822356063	1.9907115160755495e-6
26	ENSRNOG00000066622	ENSRNOG00000050585	-0.9958763202774641	2.0926956727507218e-6
27	ENSRNOG00000066622	ENSRNOG00000027839	-0.9958572182875329	2.116993058409733e-6
28	ENSRNOG00000065346	ENSRNOG00000046261	-0.9957569455038051	2.2473073357787143e-6
29	ENSRNOG00000066622	ENSRNOG00000042560	-0.9956714665569293	2.3620983264915907e-6
30	ENSRNOG00000065697	ENSRNOG00000016659	-0.9955413675304333	2.543430650980838e-6
31	ENSRNOG00000068224	ENSRNOG00000010607	-0.9953057447187516	2.8925279775826596e-6
32	ENSRNOG00000063579	ENSRNOG00000003969	-0.9953056443116846	2.8926824975350485e-6
33	ENSRNOG00000069426	ENSRNOG00000058983	-0.9951964050228329	3.0637356105422953e-6
34	ENSRNOG00000063209	ENSRNOG00000017977	-0.9951872841613613	3.078284488644556e-6
35	ENSRNOG00000070022	ENSRNOG00000017716	-0.9951605523000685	3.1211631892347214e-6
36	ENSRNOG00000063348	ENSRNOG00000005971	-0.995053367550582	3.2966747398610607e-6
37	ENSRNOG00000063209	ENSRNOG00000018694	-0.994840534933604	3.662385730462958e-6
38	ENSRNOG00000063993	ENSRNOG00000000036	-0.9947610942527533	3.804830725595565e-6
39	ENSRNOG00000068224	ENSRNOG00000061004	-0.9946751535792481	3.962612107999419e-6
40	ENSRNOG00000065346	ENSRNOG00000048264	-0.9946653769395315	3.980805076686522e-6
41	ENSRNOG00000063348	ENSRNOG00000020193	-0.9946316282353419	4.043990810220777e-6
42	ENSRNOG00000064568	ENSRNOG00000055530	-0.9945649032444992	4.170674992920453e-6
43	ENSRNOG00000067835	ENSRNOG00000024456	-0.9945595559699938	4.1809287738558965e-6
44	ENSRNOG00000067835	ENSRNOG00000068266	-0.9944364299755285	4.421219719663583e-6
45	ENSRNOG00000070022	ENSRNOG00000050578	-0.9943797521195423	4.534544482348579e-6
46	ENSRNOG00000066622	ENSRNOG00000021125	-0.9942759255255993	4.746614661765847e-6
47	ENSRNOG00000062871	ENSRNOG00000026592	-0.9941852555467602	4.936580613623676e-6
48	ENSRNOG00000070376	ENSRNOG00000018964	-0.9941566468051736	4.9974484759296445e-6
49	ENSRNOG00000062687	ENSRNOG00000030291	-0.9941555651983582	4.999758468127169e-6
50	ENSRNOG00000063579	ENSRNOG00000013663	-0.99410240032673	5.114092263225345e-6
51	MSTRG.9891	ENSRNOG00000025151	-0.9941005694847915	5.118057185171665e-6
52	ENSRNOG00000064438	ENSRNOG00000018964	-0.9940292401804761	5.273965484775545e-6
53	ENSRNOG00000063993	ENSRNOG00000024456	-0.9939952052337685	5.349346944516498e-6
54	ENSRNOG00000067235	ENSRNOG00000003104	-0.993985886139617	5.37009893619711e-6
55	ENSRNOG00000066622	ENSRNOG00000003269	-0.9939458889767625	5.459712822286633e-6
56	ENSRNOG00000066622	ENSRNOG00000003782	-0.993945484865952	5.460622770403489e-6
57	ENSRNOG00000063348	ENSRNOG00000049349	-0.9938429801221274	5.69437735942202e-6
58	ENSRNOG00000070376	ENSRNOG00000021438	-0.9938255489501955	5.734712768212802e-6
59	ENSRNOG00000066622	ENSRNOG00000014828	-0.9938076833052356	5.776230612486444e-6
60	ENSRNOG00000063209	ENSRNOG00000011441	-0.9937918464407157	5.813183866720806e-6
61	ENSRNOG00000070376	ENSRNOG00000010208	-0.9937447562695314	5.923897621773477e-6
62	MSTRG.17027	ENSRNOG00000028622	-0.9937352057066334	5.9465046828854895e-6
63	ENSRNOG00000063209	ENSRNOG00000014765	-0.9937200226332837	5.9825506355526414e-6
64	ENSRNOG00000069674	ENSRNOG00000024125	-0.9935939560458388	6.286900373630999e-6
65	ENSRNOG00000063348	ENSRNOG00000017531	-0.993585339950191	6.3080321428543584e-6
66	ENSRNOG00000071119	ENSRNOG00000067691	-0.9935315524726986	6.440912374339192e-6
67	ENSRNOG00000069161	ENSRNOG00000026080	-0.9934869185375826	6.552440863227815e-6
68	ENSRNOG00000063348	ENSRNOG00000070362	-0.9934611535431945	6.617343448755975e-6
69	ENSRNOG00000063348	ENSRNOG00000015375	-0.993440220390163	6.670356830218438e-6
70	ENSRNOG00000066031	ENSRNOG00000020546	-0.9932754870420821	7.09642503182728e-6
71	ENSRNOG00000066075	ENSRNOG00000016684	-0.9932604760272012	7.136036912491761e-6
72	ENSRNOG00000063348	ENSRNOG00000042960	-0.9932509274193372	7.1613030359074514e-6
73	ENSRNOG00000064438	ENSRNOG00000050834	-0.99324453175056	7.178256228312918e-6
74	ENSRNOG00000063348	ENSRNOG00000003967	-0.9932199855467078	7.243544602797414e-6
75	ENSRNOG00000063348	ENSRNOG00000027839	-0.9931911140306742	7.320791011400374e-6
76	ENSRNOG00000070022	ENSRNOG00000006143	-0.993096122027841	7.5784165112224855e-6
77	ENSRNOG00000070022	ENSRNOG00000055314	-0.9930653607245763	7.662989277124055e-6
78	ENSRNOG00000066622	ENSRNOG00000015020	-0.993014654433665	7.803625948543669e-6
79	MSTRG.9891	ENSRNOG00000047692	-0.9929469359730528	7.993840488218495e-6
80	ENSRNOG00000066622	ENSRNOG00000005061	-0.9929459219329178	7.996709689539472e-6
81	ENSRNOG00000063579	ENSRNOG00000019244	-0.992871781331379	8.208161994982532e-6
82	MSTRG.7821	ENSRNOG00000008026	-0.9928284862979416	8.333172425878388e-6
83	MSTRG.2148	ENSRNOG00000029339	-0.9928182238874891	8.362970188802166e-6
84	ENSRNOG00000063209	ENSRNOG00000011039	-0.9928051168210379	8.40112029609763e-6
85	ENSRNOG00000066622	ENSRNOG00000018145	-0.9927495671586706	8.563961688246025e-6
86	ENSRNOG00000063209	ENSRNOG00000027350	-0.9926581907886354	8.835910416449266e-6
87	ENSRNOG00000065163	ENSRNOG00000007200	-0.9926280815551396	8.926636495987239e-6
88	MSTRG.9891	ENSRNOG00000003134	-0.9925725518007181	9.09541819282822e-6
89	ENSRNOG00000065163	ENSRNOG00000028856	-0.9925647804200005	9.119190271800193e-6
90	ENSRNOG00000065163	ENSRNOG00000015796	-0.9925540845385306	9.151968953347023e-6
91	ENSRNOG00000066622	ENSRNOG00000020167	-0.992541220462205	9.191485613069261e-6
92	MSTRG.9891	ENSRNOG00000020687	-0.9925289100823851	9.229396882304286e-6
93	ENSRNOG00000063209	ENSRNOG00000015865	-0.9924858852884386	9.362631484322037e-6
94	ENSRNOG00000063348	ENSRNOG00000001242	-0.9924584177506126	9.448288601943133e-6
95	ENSRNOG00000067921	ENSRNOG00000065120	-0.9924498725397969	9.475032014538698e-6
96	ENSRNOG00000070022	ENSRNOG00000003869	-0.9924310910906875	9.533970265707126e-6
97	ENSRNOG00000065346	ENSRNOG00000050445	-0.9923964394926315	9.643285606486529e-6
98	ENSRNOG00000063348	ENSRNOG00000001602	-0.9923815950458927	9.69034379827427e-6
99	ENSRNOG00000063348	ENSRNOG00000033498	-0.9923369766037885	9.832614714433419e-6
100	ENSRNOG00000063579	ENSRNOG00000011826	-0.9922523779488193	1.0105783154745751e-5
101	ENSRNOG00000063209	ENSRNOG00000009296	-0.992252236419533	1.0106243910179558e-5
102	ENSRNOG00000066622	ENSRNOG00000008236	-0.9921296057040938	1.0510212445247191e-5
103	ENSRNOG00000064568	ENSRNOG00000001259	-0.9921250330967007	1.0525459022581174e-5
104	ENSRNOG00000063993	ENSRNOG00000002408	-0.9920937208676933	1.0630220052654238e-5
105	MSTRG.7821	ENSRNOG00000026080	-0.9920522927034018	1.0769781515485022e-5
106	MSTRG.15606	ENSRNOG00000024462	-0.9919754248409289	1.10316232682095e-5
107	ENSRNOG00000066622	ENSRNOG00000065713	-0.9919604811199881	1.1082965002184864e-5
108	ENSRNOG00000062871	ENSRNOG00000001252	-0.9919078474716446	1.1264934845822694e-5
109	ENSRNOG00000067105	ENSRNOG00000018279	-0.9918988610356272	1.1296180991937632e-5
110	ENSRNOG00000068246	ENSRNOG00000013591	-0.9918915399534252	1.1321674951325633e-5
111	ENSRNOG00000069611	ENSRNOG00000069312	-0.9918540537436621	1.1452751423002283e-5
112	ENSRNOG00000063209	ENSRNOG00000011425	-0.9917920172439778	1.167165920334945e-5
113	ENSRNOG00000067151	ENSRNOG00000011441	-0.991738581338571	1.1862210345547908e-5
114	ENSRNOG00000070022	ENSRNOG00000051563	-0.9917290702018661	1.1896320609494637e-5
115	MSTRG.9891	ENSRNOG00000043419	-0.991724925767783	1.1911202342229643e-5
116	ENSRNOG00000070022	ENSRNOG00000017307	-0.9917099018314057	1.1965243315703589e-5
117	ENSRNOG00000064499	ENSRNOG00000060356	-0.9916823676395286	1.2064663919453267e-5
118	ENSRNOG00000067151	ENSRNOG00000042189	-0.9916758240104934	1.2088364138573837e-5
119	ENSRNOG00000069161	ENSRNOG00000008026	-0.9916323456583158	1.224654506204459e-5
120	ENSRNOG00000065346	ENSRNOG00000007089	-0.9916114237315884	1.2323101276301429e-5
121	ENSRNOG00000066622	ENSRNOG00000003546	-0.9915697725633593	1.2476359619650879e-5
122	ENSRNOG00000069674	ENSRNOG00000019741	-0.9915474954722451	1.2558795479122864e-5
123	ENSRNOG00000064499	ENSRNOG00000050360	-0.9914950648604681	1.2754097681311194e-5
124	ENSRNOG00000063634	ENSRNOG00000049437	-0.9914811497137132	1.2806234252815685e-5
125	ENSRNOG00000067835	ENSRNOG00000000036	-0.991361778953815	1.3258729363974098e-5
126	ENSRNOG00000064337	ENSRNOG00000048256	-0.9913423088321252	1.3333427518080754e-5
127	ENSRNOG00000065346	ENSRNOG00000000552	-0.9912658360052155	1.3629254148161962e-5
128	ENSRNOG00000064568	ENSRNOG00000031974	-0.9912561130454711	1.3667144980189505e-5
129	MSTRG.12581	ENSRNOG00000069024	-0.9912206082015727	1.380604413903086e-5
130	ENSRNOG00000066622	ENSRNOG00000046204	-0.991177600110588	1.3975423968304312e-5
131	ENSRNOG00000063392	ENSRNOG00000030291	-0.991168684106712	1.4010692863664076e-5
132	ENSRNOG00000063209	ENSRNOG00000011302	-0.991160917192816	1.4041459689639879e-5
133	ENSRNOG00000066622	ENSRNOG00000000245	-0.9911371470641086	1.4135870620712865e-5
134	ENSRNOG00000066622	ENSRNOG00000021524	-0.9911212922161589	1.4199054005459288e-5
135	ENSRNOG00000063348	ENSRNOG00000007151	-0.9910938626262809	1.430876256725e-5
136	ENSRNOG00000063209	ENSRNOG00000042607	-0.9910317301229404	1.455914177528328e-5
137	ENSRNOG00000063579	ENSRNOG00000025823	-0.99100851636125	1.4653355354443676e-5
138	ENSRNOG00000063993	ENSRNOG00000047459	-0.9909726811941418	1.479950783966899e-5
139	MSTRG.5149	ENSRNOG00000009481	-0.9909721435773974	1.4801707102218842e-5
140	ENSRNOG00000071003	ENSRNOG00000018131	-0.9909527990281073	1.4880971228370399e-5
141	ENSRNOG00000066622	ENSRNOG00000012054	-0.9908985663654336	1.510454135322803e-5
142	ENSRNOG00000063348	ENSRNOG00000018384	-0.9908167899956138	1.5445438069416895e-5
143	ENSRNOG00000063348	ENSRNOG00000003269	-0.9908050391015444	1.5494797852788622e-5
144	MSTRG.12581	ENSRNOG00000004168	-0.9907735352066298	1.562759570972183e-5
145	ENSRNOG00000067105	ENSRNOG00000049911	-0.9906670033639771	1.60816925198759e-5
146	ENSRNOG00000065163	ENSRNOG00000021903	-0.9906645031292793	1.6092443450688165e-5
147	ENSRNOG00000054801	ENSRNOG00000008336	-0.9906060925392941	1.6344831895054313e-5
148	ENSRNOG00000066622	ENSRNOG00000007512	-0.9905839875922442	1.6440959519137266e-5
149	ENSRNOG00000067235	ENSRNOG00000007923	-0.9905831602355788	1.644456398874894e-5
150	ENSRNOG00000066622	ENSRNOG00000017150	-0.9905772799305941	1.6470195804529908e-5
151	ENSRNOG00000063209	ENSRNOG00000064569	-0.9905731313593455	1.6488293493654993e-5
152	ENSRNOG00000063579	ENSRNOG00000009063	-0.9905696325088579	1.6503566092396227e-5
153	ENSRNOG00000063579	ENSRNOG00000042094	-0.9905520403379211	1.6580484766270942e-5
154	ENSRNOG00000065376	ENSRNOG00000007923	-0.990551041392664	1.6584858901325106e-5
155	ENSRNOG00000063556	ENSRNOG00000007808	-0.9905183786158517	1.6728261702292357e-5
156	ENSRNOG00000003984	ENSRNOG00000022067	-0.9903684585040585	1.7395975882017467e-5
157	ENSRNOG00000063579	ENSRNOG00000037753	-0.99036486091703535	1.74121911880043e-5
158	ENSRNOG00000064568	ENSRNOG00000053942	-0.9903597152463391	1.743539984255804e-5
159	ENSRNOG00000067835	ENSRNOG00000007304	-0.9903567379448734	1.7448836892253183e-5
160	ENSRNOG00000070376	ENSRNOG00000014297	-0.9903220734529343	1.7605739565329515e-5
161	ENSRNOG00000063513	ENSRNOG00000020546	-0.9903121515340624	1.765080414095621e-5
162	ENSRNOG00000067235	ENSRNOG00000000017	-0.9903092410799057	1.7664036271902717e-5
163	MSTRG.2148	ENSRNOG00000009296	-0.9902708358134107	1.7839198581892646e-5
164	ENSRNOG00000063579	ENSRNOG00000023993	-0.9902614107247332	1.788234351507434e-5
165	ENSRNOG00000068224	ENSRNOG00000053687	-0.9902424675809147	1.796924764030372e-5
166	ENSRNOG00000070376	ENSRNOG00000050834	-0.9902407505193697	1.797713734474904e-5
167	ENSRNOG00000067835	ENSRNOG00000013408	-0.9902108438707792	1.811488755554258e-5
168	ENSRNOG00000066622	ENSRNOG00000015375	-0.990179790225256	1.8258587123121117e-5
169	ENSRNOG00000063579	ENSRNOG00000042419	-0.9901641954282918	1.8331007824112788e-5
170	ENSRNOG00000065998	ENSRNOG00000020058	-0.990096549774703	1.864713570398635e-5
171	ENSRNOG00000064438	ENSRNOG00000068399	-0.9900597311083199	1.8820560781840356e-5
172	ENSRNOG00000067105	ENSRNOG00000049034	-0.9900503713587147	1.886480072466057e-5
173	ENSRNOG00000065376	ENSRNOG00000049034	-0.9900226343382812	1.8996268110971215e-5
174	ENSRNOG00000067835	ENSRNOG00000015082	-0.9899026209221083	1.9571413933050508e-5
175	MSTRG.2148	ENSRNOG00000033503	-0.9898814967768291	1.9673711756595935e-5
176	ENSRNOG00000063348	ENSRNOG00000003546	-0.9898487896219919	1.983273245298456e-5
177	ENSRNOG00000062838	ENSRNOG00000037765	-0.989834256057366	1.990363987158794e-5
178	ENSRNOG00000063579	ENSRNOG00000006388	-0.9898142825280873	2.0001335292896272e-5
179	ENSRNOG00000063238	ENSRNOG00000012546	-0.989799447466102	2.007408249582454e-5
180	ENSRNOG00000066622	ENSRNOG00000034075	-0.9897918700765314	2.0111300977898594e-5
181	ENSRNOG00000066622	ENSRNOG00000020063	-0.9897900318215683	2.012033630149901e-5
182	ENSRNOG00000065376	ENSRNOG00000003104	-0.9897317534126466	2.040804397851481e-5
183	ENSRNOG00000070930	ENSRNOG00000004744	-0.9897282430541208	2.0425451916494808e-5
184	ENSRNOG00000067835	ENSRNOG00000018694	-0.9896995178812235	2.0568234390783147e-5
185	ENSRNOG00000069426	ENSRNOG00000010454	-0.9896975442705999	2.0578066348253543e-5
186	MSTRG.15606	ENSRNOG00000064007	-0.9896952476483474	2.0589510994817317e-5
187	MSTRG.14772	ENSRNOG00000010320	-0.9896740629868324	2.0695259060676818e-05
188	ENSRNOG00000063209	ENSRNOG00000020063	-0.9896660883030177	2.0735150494832766e-5
189	ENSRNOG00000066622	ENSRNOG00000058329	-0.9896534185101861	2.0798622607509643e-5
190	ENSRNOG00000066622	ENSRNOG00000005993	-0.9896462530481762	2.0834570952033005e-5
191	ENSRNOG00000066622	ENSRNOG00000014162	-0.9895973874255786	2.1080715471022415e-5
192	ENSRNOG00000065376	ENSRNOG00000046639	-0.9895590197248552	2.1275193349268307e-5
193	ENSRNOG00000066075	ENSRNOG00000020907	-0.9895393990666084	2.1375059479522562e-5
194	ENSRNOG00000066622	ENSRNOG00000011891	-0.9895345721853792	2.1399670449451236e-5
195	ENSRNOG00000067835	ENSRNOG00000017523	-0.9895082346463216	2.1534257022670644e-5
196	ENSRNOG00000067105	ENSRNOG00000021323	-0.9894724771941008	2.171778840853733e-5
197	ENSRNOG00000063348	ENSRNOG00000017307	-0.9894646638775265	2.1758015709583134e-5
198	ENSRNOG00000065998	ENSRNOG00000004443	-0.9894555529786084	2.180497993453656e-5
199	ENSRNOG00000065163	ENSRNOG00000058940	-0.9894261425634364	2.19569962616184e-5
200	ENSRNOG00000066622	ENSRNOG00000015857	-0.9893653574055725	2.2273186568666503e-5
201	ENSRNOG00000066031	ENSRNOG00000001869	-0.9893539800927903	2.2332669348257284e-5
202	MSTRG.2148	ENSRNOG00000056651	-0.9893469026183502	2.2369719630876972e-5
203	MSTRG.9597	ENSRNOG00000006911	-0.9893373466322056	2.2419803117124104e-5
204	ENSRNOG00000066622	ENSRNOG00000070622	-0.9893368303680254	2.242251079609403e-5
205	ENSRNOG00000067743	ENSRNOG00000060356	-0.9892948127522319	2.2643539037137117e-5
206	ENSRNOG00000063993	ENSRNOG00000005309	-0.9892841451991267	2.2699860841246533e-5
207	ENSRNOG00000063348	ENSRNOG00000069278	-0.9892800508394928	2.272150018467478e-5
208	ENSRNOG00000065346	ENSRNOG00000009063	-0.9892282122124286	2.2996543019626614e-5
209	ENSRNOG00000066622	ENSRNOG00000009323	-0.989215228215075	2.306574304622444e-5
210	ENSRNOG00000069426	ENSRNOG00000009815	-0.9891408932511218	2.3464318674282225e-5
211	ENSRNOG00000065163	ENSRNOG00000016783	-0.9891098445538918	2.3632008756990786e-5
212	ENSRNOG00000066622	ENSRNOG00000012443	-0.9890612920984019	2.38956675158164e-5
213	MSTRG.4435	ENSRNOG00000061004	-0.9890368188543825	2.4029230486721787e-5
214	ENSRNOG00000064499	ENSRNOG00000009503	-0.9890186515899944	2.4128666591849424e-5
215	MSTRG.15404	ENSRNOG00000050207	-0.9890076065197979	2.4189240397376466e-5
216	ENSRNOG00000069674	ENSRNOG00000005770	-0.9889985325804027	2.4239072032194997e-5
217	ENSRNOG00000064438	ENSRNOG00000021438	-0.9889464281015896	2.4526404118763168e-5
218	ENSRNOG00000065346	ENSRNOG00000064293	-0.9888776917444361	2.490855560077776e-5
219	ENSRNOG00000069674	ENSRNOG00000037080	-0.9888742249744374	2.4927923358397663e-5
220	ENSRNOG00000067105	ENSRNOG00000046639	-0.9888676084160467	2.4964912989311472e-5
221	ENSRNOG00000071119	ENSRNOG00000030449	-0.9888627418117277	2.499214050377674e-5
222	ENSRNOG00000070022	ENSRNOG00000019208	-0.9888457305786935	2.5087453882299826e-5
223	ENSRNOG00000063209	ENSRNOG00000017523	-0.9888415174422261	2.5111093478580315e-5
224	ENSRNOG00000069674	ENSRNOG00000063400	-0.9888295106670159	2.517853566574857e-5
225	ENSRNOG00000065346	ENSRNOG00000008822	-0.9888246988029924	2.52055943292806e-5
226	ENSRNOG00000063579	ENSRNOG00000013309	-0.9887940358378334	2.537843056527045e-5
227	ENSRNOG00000063579	ENSRNOG00000049349	-0.9887533629180884	2.5608780148456134e-5
228	ENSRNOG00000064568	ENSRNOG00000068667	-0.9887172629820206	2.581427436187944e-5
229	ENSRNOG00000064568	ENSRNOG00000024462	-0.9886976169475756	2.592651981458971e-5
230	ENSRNOG00000066622	ENSRNOG00000013747	-0.9886670004988916	2.6102024471619245e-5
231	ENSRNOG00000065697	ENSRNOG00000019770	-0.9886451858307821	2.622750635206117e-5
232	ENSRNOG00000065346	ENSRNOG00000006604	-0.9886145812104516	2.640415660315476e-5
233	ENSRNOG00000063348	ENSRNOG00000042560	-0.9886137598929796	2.640890703098364e-5
234	ENSRNOG00000066622	ENSRNOG00000020317	-0.98858905130968	2.6552058340456597e-5
235	ENSRNOG00000069426	ENSRNOG00000018938	-0.9885631164423224	2.6702812318424307e-5
236	ENSRNOG00000062871	ENSRNOG00000070689	-0.9885377915695599	2.6850513344500726e-5
237	MSTRG.2148	ENSRNOG00000007237	-0.9885214780505649	2.6945916008713766e-5
238	ENSRNOG00000066622	ENSRNOG00000018689	-0.9885023736062641	2.7057897551863164e-5
239	ENSRNOG00000063392	ENSRNOG00000049034	-0.9884555463478573	2.733355315953645e-5
240	ENSRNOG00000067921	ENSRNOG00000008716	-0.9884412993877051	2.74177516885743e-5
241	ENSRNOG00000067835	ENSRNOG00000020063	-0.9884402165594621	2.742415746004312e-5
242	ENSRNOG00000063209	ENSRNOG00000015082	-0.9884021671724517	2.764981768788033e-5
243	ENSRNOG00000063348	ENSRNOG00000014902	-0.98837333832247	2.7821530335536693e-5
244	ENSRNOG00000066884	ENSRNOG00000067308	-0.988361109250298	2.7894562190544647e-5
245	MSTRG.12581	ENSRNOG00000050317	-0.9883454110514198	2.798847948781713e-5
246	ENSRNOG00000063513	ENSRNOG00000000442	-0.9883137798672698	2.8178292435399044e-5
247	ENSRNOG00000063179	ENSRNOG00000027157	-0.988295654327755	2.8287406401261705e-5
248	MSTRG.17017	ENSRNOG00000005883	-0.9882626341120581	2.8486833368202014e-5
249	ENSRNOG00000065163	ENSRNOG00000007477	-0.9881784290242251	2.8999191021172877e-5
250	ENSRNOG00000063579	ENSRNOG00000011284	-0.9881562226092877	2.9135219897113984e-5
251	ENSRNOG00000063634	ENSRNOG00000001229	-0.9881519193066954	2.916162449073667e-5
252	ENSRNOG00000071185	ENSRNOG00000065735	-0.9881501762808442	2.9172323576576176e-5
253	ENSRNOG00000063579	ENSRNOG00000070362	-0.9881224088153654	2.9343083141952775e-5
254	MSTRG.9891	ENSRNOG00000049215	-0.9881198862212209	2.9358625690756313e-5
255	ENSRNOG00000065786	ENSRNOG00000031779	-0.9881131414882935	2.940020642583363e-5
256	ENSRNOG00000066622	ENSRNOG00000012156	-0.9880680772783165	2.967892722294252e-5
257	ENSRNOG00000066075	ENSRNOG00000009503	-0.9880321871689562	2.9902032273820822e-5
258	ENSRNOG00000066622	ENSRNOG00000013521	-0.98802691059185	2.9934917525675786e-5
259	ENSRNOG00000063209	ENSRNOG00000006615	-0.9880087123354659	3.004850051513408e-5
260	ENSRNOG00000063993	ENSRNOG00000068266	-0.9879502982168313	3.041482703469711e-5
261	ENSRNOG00000067151	ENSRNOG00000059092	-0.9879409551564237	3.047366555319897e-5
262	ENSRNOG00000051306	ENSRNOG00000016196	-0.9879340126562007	3.05174304293665e-5
263	MSTRG.2148	ENSRNOG00000013851	-0.9879256607253675	3.057012999652109e-5
264	ENSRNOG00000066075	ENSRNOG00000052549	-0.9879223068840922	3.059130758731321e-5
265	MSTRG.5149	ENSRNOG00000022844	-0.9878950407941709	3.0763802913336136e-5
266	ENSRNOG00000069426	ENSRNOG00000015829	-0.9878672645580293	3.094012223847642e-5
267	ENSRNOG00000063348	ENSRNOG00000012156	-0.9878508782341434	3.104442280310593e-5
268	MSTRG.2148	ENSRNOG00000014525	-0.9878175522774858	3.125719359653445e-5
269	MSTRG.16924	ENSRNOG00000017773	-0.9878147364994116	3.1275210855108426e-5
270	ENSRNOG00000071185	ENSRNOG00000011441	-0.987714317811571	3.1921821452840504e-5
271	ENSRNOG00000067743	ENSRNOG00000008026	-0.9876801771824143	3.2143462024514236e-5
272	ENSRNOG00000066075	ENSRNOG00000001259	-0.9876530562732503	3.232018451360119e-5
273	ENSRNOG00000065376	ENSRNOG00000039496	-0.9876219926494397	3.2523310274257256e-5
274	ENSRNOG00000070022	ENSRNOG00000001245	-0.9876029833655224	3.2647987850076277e-5
275	ENSRNOG00000066622	ENSRNOG00000002949	-0.9876015821926739	3.2657189112050844e-5
276	ENSRNOG00000065998	ENSRNOG00000068484	-0.9875844843615799	3.276959253240008e-5
277	ENSRNOG00000067235	ENSRNOG00000046639	-0.9875767656078873	3.2820412313228076e-5
278	MSTRG.15606	ENSRNOG00000011277	-0.9875548752226918	3.296479339187641e-5
279	ENSRNOG00000062871	ENSRNOG00000017401	-0.9875514930884195	3.2987134527040496e-5
280	ENSRNOG00000066622	ENSRNOG00000001245	-0.9875170997265484	3.3214838561335114e-5
281	ENSRNOG00000067835	ENSRNOG00000020105	-0.9874890472531052	3.3401256035237026e-5
282	ENSRNOG00000066622	ENSRNOG00000002832	-0.98748757036718	3.341108769183698e-5
283	ENSRNOG00000069674	ENSRNOG00000052294	-0.9874830120270167	3.344144355565959e-5
284	ENSRNOG00000067835	ENSRNOG00000020776	-0.9874231437641807	3.384166185105286e-5
285	ENSRNOG00000065346	ENSRNOG00000048114	-0.987394271730781	3.403568901449994e-5
286	ENSRNOG00000064568	ENSRNOG00000062568	-0.9873882470005592	3.4076260330362373e-5
287	ENSRNOG00000065163	ENSRNOG00000008054	-0.9873765208472973	3.41553086329327e-5
288	ENSRNOG00000063579	ENSRNOG00000018081	-0.9873538290493283	3.430858957753635e-5
289	ENSRNOG00000069611	ENSRNOG00000051837	-0.9873523902388017	3.431832244138455e-5
290	ENSRNOG00000065376	ENSRNOG00000018279	-0.9873447994571826	3.436969776626775e-5
291	ENSRNOG00000069426	ENSRNOG00000053675	-0.98733798332276	3.441586934038732e-5
292	ENSRNOG00000063579	ENSRNOG00000011821	-0.9873280550172326	3.4483188647627117e-5
293	ENSRNOG00000066622	ENSRNOG00000007151	-0.9873092865887594	3.4610663708356526e-5
294	ENSRNOG00000070022	ENSRNOG00000071023	-0.9873033941786573	3.46507429342946e-5
295	ENSRNOG00000066622	ENSRNOG00000017307	-0.9872876982769024	3.4757639273186314e-5
296	ENSRNOG00000063348	ENSRNOG00000061863	-0.9872754772213007	3.484100663309064e-5
297	ENSRNOG00000063579	ENSRNOG00000018384	-0.9872681510751139	3.489104004383847e-5
298	ENSRNOG00000067105	ENSRNOG00000033503	-0.98725156368364	3.5004481135469945e-5
299	ENSRNOG00000069674	ENSRNOG00000036680	-0.9872336304625404	3.512737407262989e-5
300	ENSRNOG00000068224	ENSRNOG00000022353	-0.9872238356636152	3.5194604697696974e-5
301	ENSRNOG00000063348	ENSRNOG00000006741	-0.9872165230405046	3.524484799921623e-5
302	ENSRNOG00000070022	ENSRNOG00000003546	-0.9872007841480733	3.53531315870903e-5
303	ENSRNOG00000064568	ENSRNOG00000069925	-0.9871923282614437	3.541139010754257e-5
304	ENSRNOG00000062871	ENSRNOG00000011203	-0.9871631228485214	3.5613047868920944e-5
305	ENSRNOG00000067835	ENSRNOG00000022555	-0.9871300864524966	3.584198343498102e-5
306	ENSRNOG00000066622	ENSRNOG00000016704	-0.9870715505580361	3.624978084815211e-5
307	ENSRNOG00000066622	ENSRNOG00000020193	-0.9870669719812306	3.6281794400849776e-5
308	ENSRNOG00000065697	ENSRNOG00000054086	-0.9870538585114966	3.6373577687154324e-5
309	ENSRNOG00000064568	ENSRNOG00000007200	-0.9870279618683026	3.655523979251285e-5
310	ENSRNOG00000063579	ENSRNOG00000020167	-0.9870059629542799	3.67099849147845e-5
311	ENSRNOG00000063348	ENSRNOG00000032745	-0.9870036555560937	3.672623829764632e-5
312	ENSRNOG00000064568	ENSRNOG00000007477	-0.9869972049274602	3.677169954086068e-5
313	ENSRNOG00000063579	ENSRNOG00000015052	-0.9869709570687364	3.695702992501104e-5
314	ENSRNOG00000066622	ENSRNOG00000013663	-0.9869490841541976	3.711189539634674e-5
315	ENSRNOG00000067921	ENSRNOG00000003280	-0.9869199828026622	3.731854034727533e-5
316	ENSRNOG00000063348	ENSRNOG00000015020	-0.9869183079203083	3.733045434817228e-5
317	ENSRNOG00000064337	ENSRNOG00000020058	-0.9869031498872282	3.743838193082105e-5
318	ENSRNOG00000065163	ENSRNOG00000018830	-0.9868933825328705	3.750802572266565e-5
319	ENSRNOG00000067151	ENSRNOG00000017977	-0.9868344673118566	3.7929748684772946e-5
320	ENSRNOG00000063579	ENSRNOG00000069743	-0.9868089182671351	3.811350884097564e-5
321	ENSRNOG00000070022	ENSRNOG00000017558	-0.9867906894070224	3.824494356963193e-5
322	ENSRNOG00000063348	ENSRNOG00000070622	-0.9867693960946388	3.8398816375906364e-5
323	ENSRNOG00000066622	ENSRNOG00000000610	-0.9867629408005949	3.8445537515308104e-5
324	ENSRNOG00000067835	ENSRNOG00000031789	-0.9867445516334427	3.857881801372365e-5
325	ENSRNOG00000067235	ENSRNOG00000031855	-0.9866901555628439	3.897468350766431e-5
326	ENSRNOG00000070376	ENSRNOG00000049495	-0.9866623846826337	3.917771712025342e-5
327	ENSRNOG00000070022	ENSRNOG00000000219	-0.9866416735171996	3.932954761554086e-5
328	MSTRG.15606	ENSRNOG00000054460	-0.986635911675107	3.937184924884818e-5
329	ENSRNOG00000066075	ENSRNOG00000068162	-0.9866313747478832	3.9405177070239716e-5
330	ENSRNOG00000063348	ENSRNOG00000019244	-0.9866309496018129	3.940830101489823e-5
331	ENSRNOG00000070022	ENSRNOG00000003858	-0.9866274240853996	3.943421197760699e-5
332	ENSRNOG00000067835	ENSRNOG00000016550	-0.9866111403133075	3.955402250399587e-5
333	ENSRNOG00000064499	ENSRNOG00000068425	-0.986602317035319	3.961903198179684e-5
334	ENSRNOG00000067743	ENSRNOG00000025480	-0.9865861220978428	3.97385215671342e-5
335	ENSRNOG00000063348	ENSRNOG00000015857	-0.9865608412632275	3.992547884368314e-5
336	ENSRNOG00000065163	ENSRNOG00000004208	-0.9865475038292181	4.00243234714992e-5
337	ENSRNOG00000066622	ENSRNOG00000001979	-0.9865332858607477	4.012985470103203e-5
338	ENSRNOG00000066622	ENSRNOG00000064293	-0.9865110108432044	4.029552248763224e-5
339	ENSRNOG00000062838	ENSRNOG00000016419	-0.9865110042369479	4.029557168161446e-5
340	ENSRNOG00000064438	ENSRNOG00000014297	-0.9864300810214723	4.090086546537641e-5
341	ENSRNOG00000063348	ENSRNOG00000017220	-0.986425961647346	4.093182212505653e-5
342	ENSRNOG00000067105	ENSRNOG00000050794	-0.9864025993370346	4.110765229303759e-5
343	MSTRG.2148	ENSRNOG00000011441	-0.9863359655822231	4.161163022020631e-5
344	ENSRNOG00000067835	ENSRNOG00000011302	-0.9863340696733817	4.162602346369226e-5
345	ENSRNOG00000063348	ENSRNOG00000016643	-0.9863058748154072	4.18404226356639e-5
346	ENSRNOG00000067105	ENSRNOG00000003104	-0.9862873187017362	4.19818862362753e-5
347	ENSRNOG00000065376	ENSRNOG00000050794	-0.9862840737875708	4.200665334375131e-5
348	ENSRNOG00000063348	ENSRNOG00000008236	-0.9862811301818989	4.202912823769722e-5
349	ENSRNOG00000063348	ENSRNOG00000002425	-0.9862352370732628	4.238045904791932e-5
350	ENSRNOG00000064548	ENSRNOG00000003066	-0.9862184853528024	4.25091360560792e-5
351	ENSRNOG00000071003	ENSRNOG00000021062	-0.9862056461206399	4.260791744936654e-5
352	ENSRNOG00000063348	ENSRNOG00000019990	-0.9861731977831241	4.285817671134673e-5
353	ENSRNOG00000065786	ENSRNOG00000015991	-0.9861332018658716	4.3167852946890406e-5
354	ENSRNOG00000063209	ENSRNOG00000046204	-0.986097808632369	4.3443003920895507e-5
355	ENSRNOG00000063348	ENSRNOG00000016758	-0.9860913698839988	4.349317182250623e-5
356	ENSRNOG00000067151	ENSRNOG00000015865	-0.9860669096563617	4.368407067789626e-5
357	MSTRG.9891	ENSRNOG00000027869	-0.986054030912011	4.3784783153810736e-5
358	ENSRNOG00000065346	ENSRNOG00000007512	-0.98603829960758	4.390799089026842e-5
359	ENSRNOG00000066622	ENSRNOG00000061876	-0.9860330412214682	4.3949220766670294e-5
360	ENSRNOG00000066622	ENSRNOG00000032745	-0.9860166888796816	4.4077583769119855e-5
361	ENSRNOG00000067743	ENSRNOG00000009503	-0.9859835896958931	4.433809154802404e-5
362	ENSRNOG00000069674	ENSRNOG00000061004	-0.9859594194243563	4.452890394435194e-5
363	ENSRNOG00000067835	ENSRNOG00000017434	-0.985924552958141	4.480502063097802e-5
364	ENSRNOG00000066622	ENSRNOG00000050223	-0.9859049286745188	4.4960879261424225e-5
365	ENSRNOG00000065376	ENSRNOG00000007546	-0.9859045050992015	4.4964246918022255e-5
366	ENSRNOG00000066622	ENSRNOG00000003150	-0.9858734014964983	4.52119497080794e-5
367	ENSRNOG00000070376	ENSRNOG00000055314	-0.9858574698034758	4.533914152382579e-5
368	ENSRNOG00000067921	ENSRNOG00000009515	-0.9858523873581903	4.5379762519726086e-5
369	ENSRNOG00000065163	ENSRNOG00000014576	-0.9858467084485301	4.542517641992205e-5
370	MSTRG.2148	ENSRNOG00000020317	-0.985843079230733	4.5454213274620514e-5
371	ENSRNOG00000062871	ENSRNOG00000011944	-0.9858239431729665	4.5607501550470886e-5
372	ENSRNOG00000070376	ENSRNOG00000031855	-0.985801390052837	4.57885580407158e-5
373	ENSRNOG00000063993	ENSRNOG00000013408	-0.9857934220836906	4.5852627405196245e-5
374	MSTRG.5534	ENSRNOG00000028470	-0.9857679355168404	4.6057921025521864e-5
375	ENSRNOG00000066622	ENSRNOG00000011302	-0.9857489783365846	4.6210976131000336e-5
376	ENSRNOG00000063634	ENSRNOG00000009963	-0.9857444405918167	4.624765765770533e-5
377	ENSRNOG00000067151	ENSRNOG00000018694	-0.9857016324779214	4.6594559693691195e-5
378	ENSRNOG00000066622	ENSRNOG00000001242	-0.9856029653770023	4.740003108771873e-5
379	ENSRNOG00000065163	ENSRNOG00000006503	-0.9855849324875274	4.7548135256203494e-5
380	MSTRG.5534	ENSRNOG00000018051	-0.9855703451739105	4.766814293866162e-5
381	ENSRNOG00000067151	ENSRNOG00000017434	-0.9855679601777166	4.768778114505601e-5
382	ENSRNOG00000063579	ENSRNOG00000019990	-0.9855468460935648	4.786184665839244e-5
383	ENSRNOG00000065846	ENSRNOG00000030522	-0.9855349378820262	4.796018568642424e-5
384	ENSRNOG00000067235	ENSRNOG00000049034	-0.9855298458718106	4.800227275669755e-5
385	ENSRNOG00000063348	ENSRNOG00000013521	-0.985518442608768	4.809660434235141e-5
386	ENSRNOG00000066622	ENSRNOG00000016643	-0.985510498209023	4.8162388466721495e-5
387	ENSRNOG00000066884	ENSRNOG00000001389	-0.985474888416159	4.8457918082611684e-5
388	ENSRNOG00000067151	ENSRNOG00000011039	-0.985471875399833	4.848297301407456e-5
389	ENSRNOG00000065163	ENSRNOG00000003195	-0.9854515926278032	4.8651837136537424e-5
390	ENSRNOG00000066622	ENSRNOG00000022555	-0.9854135768546025	4.896928268394163e-5
391	ENSRNOG00000063209	ENSRNOG00000015514	-0.985384540247451	4.921258025980535e-5
392	MSTRG.12581	ENSRNOG00000019202	-0.9853529981024733	4.947768849028478e-5
393	ENSRNOG00000066622	ENSRNOG00000025823	-0.9853231782722085	4.972910378397977e-5
394	ENSRNOG00000067835	ENSRNOG00000018748	-0.9853208850433509	4.97484698591677e-5
395	ENSRNOG00000063348	ENSRNOG00000020167	-0.9853010478879164	4.991618061689351e-5
396	ENSRNOG00000069674	ENSRNOG00000015972	-0.9852990588898435	4.9933014956593524e-5
397	ENSRNOG00000067235	ENSRNOG00000021323	-0.9852760556630439	5.0127954505541084e-5
398	ENSRNOG00000067235	ENSRNOG00000007546	-0.9852710607941648	5.017034321785907e-5
399	ENSRNOG00000067105	ENSRNOG00000008716	-0.9852621436326405	5.0246071502613177e-5
400	ENSRNOG00000063348	ENSRNOG00000020994	-0.9852586927044947	5.0275396551224816e-5
401	ENSRNOG00000066622	ENSRNOG00000042094	-0.9852157839901189	5.064087729378386e-5
402	ENSRNOG00000062871	ENSRNOG00000000981	-0.985188801596377	5.0871513864070295e-5
403	ENSRNOG00000067835	ENSRNOG00000046204	-0.9851668498233355	5.105961243012658e-5
404	ENSRNOG00000066622	ENSRNOG00000001602	-0.985165098847809	5.107463390929823e-5
405	ENSRNOG00000066622	ENSRNOG00000011752	-0.9851592837923453	5.11245397483151e-5
406	ENSRNOG00000064568	ENSRNOG00000023299	-0.9851226503503144	5.143960427322902e-5
407	ENSRNOG00000070797	ENSRNOG00000066660	-0.9850817057706721	5.179311601022363e-5
408	MSTRG.4435	ENSRNOG00000013072	-0.9850765107874703	5.18380724490175e-5
409	ENSRNOG00000067105	ENSRNOG00000039496	-0.9850517250558769	5.205288455667478e-5
410	MSTRG.12916	ENSRNOG00000018413	-0.9850486878163295	5.2079244103442335e-5
411	ENSRNOG00000063348	ENSRNOG00000045686	-0.9850396538817611	5.215769480049204e-5
412	ENSRNOG00000062871	ENSRNOG00000067039	-0.9850370759674727	5.218009434937443e-5
413	ENSRNOG00000066622	ENSRNOG00000046468	-0.9850334533073792	5.221158142632021e-5
414	MSTRG.2148	ENSRNOG00000051624	-0.9850196504010884	5.23316561567011e-5
415	ENSRNOG00000065163	ENSRNOG00000012802	-0.985016323987964	5.236061805069525e-5
416	MSTRG.4435	ENSRNOG00000031849	-0.9850053610602515	5.245613612769873e-5
417	ENSRNOG00000062838	ENSRNOG00000014721	-0.9850000150790963	5.250275245627378e-5
418	ENSRNOG00000066884	ENSRNOG00000001275	-0.9849994340933343	5.2507820074154665e-5
419	ENSRNOG00000065376	ENSRNOG00000030291	-0.9849893076607168	5.259619428943374e-5
420	ENSRNOG00000065163	ENSRNOG00000051372	-0.9849602846614911	5.284997245147416e-5
421	MSTRG.10313	ENSRNOG00000062500	-0.9849577150519736	5.287247638174897e-5
422	ENSRNOG00000066884	ENSRNOG00000007490	-0.9849510423810502	5.29309405195022e-5
423	ENSRNOG00000067835	ENSRNOG00000012269	-0.9849103395669532	5.328840378204802e-5
424	ENSRNOG00000065786	ENSRNOG00000031849	-0.9848739142185065	5.3609520563213664e-5
425	ENSRNOG00000066622	ENSRNOG00000005971	-0.9848609200465155	5.3724352931272534e-5
426	ENSRNOG00000067835	ENSRNOG00000009296	-0.9848546676586585	5.3779658975239286e-5
427	ENSRNOG00000065346	ENSRNOG00000018081	-0.9848378920422394	5.392821715477503e-5
428	MSTRG.2148	ENSRNOG00000006783	-0.9848372495729227	5.393391147512361e-5
429	ENSRNOG00000063209	ENSRNOG00000070622	-0.9848317054455559	5.3983064988383234e-5
430	ENSRNOG00000066622	ENSRNOG00000008424	-0.9848027982323627	5.4239786049459227e-5
431	ENSRNOG00000066622	ENSRNOG00000008830	-0.9847881178218373	5.437043944978015e-5
432	MSTRG.13181	ENSRNOG00000028781	-0.984774966607521	5.448764272664164e-5
433	ENSRNOG00000066075	ENSRNOG00000050360	-0.9847517813726747	5.4694636223651116e-5
434	ENSRNOG00000067595	ENSRNOG00000043375	-0.9847193659877624	5.4984821122427974e-5
435	ENSRNOG00000064438	ENSRNOG00000021812	-0.9847180205339034	5.4996885553437735e-5
436	ENSRNOG00000065163	ENSRNOG00000033528	-0.9847176743621444	5.49999898660225e-5
437	ENSRNOG00000061154	ENSRNOG00000033653	-0.9846418910323195	5.568210221529313e-5
438	ENSRNOG00000063348	ENSRNOG00000002832	-0.9846361379588044	5.5734089805525855e-5
439	ENSRNOG00000064499	ENSRNOG00000024178	-0.9846286463026981	5.580183152398277e-5
440	ENSRNOG00000067835	ENSRNOG00000003232	-0.9846190792580648	5.5888410978255365e-5
441	ENSRNOG00000066031	ENSRNOG00000024578	-0.9845858978019332	5.618931670792193e-5
442	ENSRNOG00000071003	ENSRNOG00000020202	-0.9845746379472864	5.629164598230929e-5
443	MSTRG.4435	ENSRNOG00000062383	-0.9845626026375996	5.640114556126896e-5
444	ENSRNOG00000063348	ENSRNOG00000018689	-0.984533539236912	5.6666094280011237e-5
445	ENSRNOG00000065346	ENSRNOG00000009980	-0.9845266966124665	5.672858112659718e-5
446	ENSRNOG00000067235	ENSRNOG00000039496	-0.9845221804267714	5.676984547076103e-5
447	ENSRNOG00000063348	ENSRNOG00000056728	-0.9845145225917926	5.683985599747032e-5
448	ENSRNOG00000064438	ENSRNOG00000039496	-0.9844981443858885	5.6989764144477206e-5
449	MSTRG.2148	ENSRNOG00000018694	-0.98447253715324	5.722461748502994e-5
450	MSTRG.9891	ENSRNOG00000022067	-0.9844663607637504	5.728134979365862e-5
451	ENSRNOG00000070022	ENSRNOG00000025245	-0.984449223551787	5.7438936982068256e-5
452	ENSRNOG00000063579	ENSRNOG00000039865	-0.9844442853690756	5.748439460573351e-5
453	ENSRNOG00000066622	ENSRNOG00000001374	-0.9844132318402822	5.777074513479974e-5
454	MSTRG.5534	ENSRNOG00000030714	-0.9843901930718069	5.798373940324453e-5
455	ENSRNOG00000063348	ENSRNOG00000046791	-0.9843502685107787	5.835395268194432e-5
456	ENSRNOG00000064568	ENSRNOG00000002592	-0.9843480281152227	5.837476917935902e-5
457	ENSRNOG00000065376	ENSRNOG00000049911	-0.9843440761724073	5.841149922325428e-5
458	MSTRG.4435	ENSRNOG00000017893	-0.9843268197470925	5.8572045158022945e-5
459	MSTRG.4435	ENSRNOG00000015991	-0.9843068582657548	5.875808611777167e-5
460	ENSRNOG00000070022	ENSRNOG00000046891	-0.9842603656681539	5.9192763969928563e-5
461	MSTRG.2148	ENSRNOG00000011039	-0.9842589409429668	5.9206114519705366e-5
462	ENSRNOG00000065346	ENSRNOG00000066958	-0.9842352149884465	5.942870566677527e-5
463	ENSRNOG00000066622	ENSRNOG00000012123	-0.9842182146038575	5.958850604015353e-5
464	ENSRNOG00000061154	ENSRNOG00000060867	-0.9842179996859911	5.959052786774777e-5
465	ENSRNOG00000066031	ENSRNOG00000003280	-0.9842179642865033	5.959086089024623e-5
466	ENSRNOG00000068224	ENSRNOG00000015991	-0.9842055862261967	5.970737631999512e-5
467	ENSRNOG00000069674	ENSRNOG00000014963	-0.9841988367404529	5.9770966913674783e-5
468	ENSRNOG00000070376	ENSRNOG00000050317	-0.9841810630136006	5.9938616355559304e-5
469	ENSRNOG00000062746	ENSRNOG00000017175	-0.98416096261973	6.012854994930095e-5
470	MSTRG.15606	ENSRNOG00000069483	-0.9841603524219392	6.0134321472782304e-5
471	ENSRNOG00000063579	ENSRNOG00000006761	-0.9841104911500899	6.060705030996871e-5
472	ENSRNOG00000066884	ENSRNOG00000005573	-0.9840980886804851	6.072498014164651e-5
473	ENSRNOG00000066622	ENSRNOG00000046261	-0.9840930796850597	6.077264737669452e-5
474	ENSRNOG00000063579	ENSRNOG00000050318	-0.9840880445755161	6.082058563694481e-5
475	ENSRNOG00000066622	ENSRNOG00000030776	-0.9840781690031091	6.0914674534728874e-5
476	ENSRNOG00000066622	ENSRNOG00000000906	-0.9840606985476182	6.108133600823962e-5
477	ENSRNOG00000070022	ENSRNOG00000017220	-0.9840596344564799	6.109149581856599e-5
478	ENSRNOG00000063348	ENSRNOG00000026646	-0.9840131265109411	6.15365343556995e-5
479	MSTRG.5149	ENSRNOG00000000081	-0.9840115070581817	6.155206580515937e-5
480	ENSRNOG00000063348	ENSRNOG00000046204	-0.9839937631734117	6.172239285451298e-5
481	ENSRNOG00000069674	ENSRNOG00000053675	-0.9839934335280318	6.172555984518269e-5
482	MSTRG.4435	ENSRNOG00000001313	-0.983950568327097	6.213820436595796e-5
483	ENSRNOG00000063348	ENSRNOG00000005615	-0.9839237525710935	6.239718320921739e-5
484	ENSRNOG00000066622	ENSRNOG00000050578	-0.9839167882061395	6.246454828673365e-5
485	ENSRNOG00000068224	ENSRNOG00000011133	-0.9838944555606589	6.268086091010261e-5
486	ENSRNOG00000065346	ENSRNOG00000002722	-0.9838762023011023	6.285799262117919e-5
487	ENSRNOG00000065376	ENSRNOG00000000017	-0.9837642722068501	6.395071047826661e-5
488	ENSRNOG00000064438	ENSRNOG00000010208	-0.9837255882070713	6.433098068692189e-5
489	ENSRNOG00000061154	ENSRNOG00000056001	-0.9837238108246721	6.434848501113422e-5
490	ENSRNOG00000066075	ENSRNOG00000022911	-0.9836862010531771	6.471954708087146e-5
491	ENSRNOG00000064499	ENSRNOG00000018938	-0.9836680026782398	6.489955178512474e-5
492	ENSRNOG00000070797	ENSRNOG00000007799	-0.9836675143278756	6.49043862952503e-5
493	ENSRNOG00000063579	ENSRNOG00000033498	-0.9836642794307061	6.49364161571242e-5
494	ENSRNOG00000067835	ENSRNOG00000006778	-0.9836529102057852	6.504906175130998e-5
495	ENSRNOG00000066622	ENSRNOG00000025075	-0.9836357812457243	6.52189946483972e-5
496	ENSRNOG00000066622	ENSRNOG00000008603	-0.9836348538974097	6.522820223620052e-5
497	ENSRNOG00000070022	ENSRNOG00000003782	-0.9836230122947087	6.534584506923125e-5
498	ENSRNOG00000070022	ENSRNOG00000029441	-0.9836128690681292	6.544671570773986e-5
499	ENSRNOG00000065346	ENSRNOG00000003150	-0.9836041023667793	6.553397217423651e-5
500	ENSRNOG00000069541	ENSRNOG00000063089	-0.9836014913401522	6.555997358348442e-5
501	ENSRNOG00000070022	ENSRNOG00000007900	-0.9835993610526464	6.558119220700931e-5
502	ENSRNOG00000068332	ENSRNOG00000062467	-0.983587805831415	6.569635886632952e-5
503	ENSRNOG00000063209	ENSRNOG00000008565	-0.9835762849438229	6.581130348148889e-5
504	ENSRNOG00000063579	ENSRNOG00000002425	-0.9835752111320216	6.582202308225149e-5
505	ENSRNOG00000070022	ENSRNOG00000009381	-0.9835274967425327	6.629939706037646e-5
506	ENSRNOG00000066622	ENSRNOG00000020776	-0.9835186943268092	6.638768879785317e-5
507	ENSRNOG00000063594	ENSRNOG00000025720	-0.9835002550974029	6.657286910183302e-5
508	ENSRNOG00000066622	ENSRNOG00000069278	-0.9834840710853655	6.673565472548049e-5
509	ENSRNOG00000066622	ENSRNOG00000045686	-0.9834823261053531	6.675322065041733e-5
510	ENSRNOG00000065163	ENSRNOG00000009815	-0.9834645674462518	6.6932146075116e-5
511	ENSRNOG00000066075	ENSRNOG00000016289	-0.9834589057033833	6.698925047832205e-5
512	ENSRNOG00000065376	ENSRNOG00000021323	-0.9834570116097927	6.700836081963146e-5
513	ENSRNOG00000065163	ENSRNOG00000010840	-0.983446600691853	6.711345925758394e-5
514	ENSRNOG00000066622	ENSRNOG00000014064	-0.9834193135380147	6.738939052275406e-5
515	ENSRNOG00000065163	ENSRNOG00000004585	-0.9833970498230471	6.761502509178285e-5
516	ENSRNOG00000065163	ENSRNOG00000000658	-0.9833959872873362	6.762580476138425e-5
517	ENSRNOG00000066075	ENSRNOG00000013306	-0.9833952131795688	6.763365890916084e-5
518	ENSRNOG00000065163	ENSRNOG00000016544	-0.9833838790310557	6.774871829184903e-5
519	ENSRNOG00000067835	ENSRNOG00000064293	-0.983375080756914	6.783811509469828e-5
520	ENSRNOG00000070022	ENSRNOG00000049780	-0.983369669569647	6.7893131617369207e-05
521	ENSRNOG00000070022	ENSRNOG00000020525	-0.9833501659063126	6.809164992604977e-5
522	ENSRNOG00000066622	ENSRNOG00000018748	-0.9833485551425024	6.810806058155094e-5
523	ENSRNOG00000062871	ENSRNOG00000008603	-0.9833224247376298	6.83746102367877e-5
524	ENSRNOG00000063209	ENSRNOG00000006575	-0.9833148958116483	6.84515262956431e-5
525	ENSRNOG00000065697	ENSRNOG00000021116	-0.9832800300401532	6.880839103762248e-5
526	ENSRNOG00000065998	ENSRNOG00000039305	-0.9832296059113776	6.93264628477408e-5
527	ENSRNOG00000062838	ENSRNOG00000000221	-0.983214957899946	6.947739576412815e-5
528	ENSRNOG00000068224	ENSRNOG00000022567	-0.9831822313363571	6.981531820571263e-5
529	ENSRNOG00000063209	ENSRNOG00000003269	-0.9831808826727866	6.98292650151977e-5
530	ENSRNOG00000067235	ENSRNOG00000021438	-0.9831576102199285	7.007019233506995e-5
531	MSTRG.9891	ENSRNOG00000053047	-0.9831570508518874	7.007598927266656e-5
532	ENSRNOG00000065346	ENSRNOG00000016636	-0.9831360442929369	7.029389534074504e-5
533	ENSRNOG00000063209	ENSRNOG00000020105	-0.983125868237393	7.039959926613548e-5
534	ENSRNOG00000064337	ENSRNOG00000040242	-0.9831162426434987	7.049967255268186e-5
535	ENSRNOG00000066622	ENSRNOG00000042960	-0.9830830420003245	7.084549728597622e-5
536	ENSRNOG00000063348	ENSRNOG00000065713	-0.9830380433707149	7.131582593444818e-5
537	ENSRNOG00000067105	ENSRNOG00000002693	-0.983033883581468	7.135939817271009e-5
538	ENSRNOG00000063348	ENSRNOG00000000906	-0.9830296068977012	7.140421140361397e-5
539	ENSRNOG00000065346	ENSRNOG00000069578	-0.9830169102698866	7.153735198972555e-5
540	MSTRG.13181	ENSRNOG00000020045	-0.9830148485373464	7.15589859021648e-5
541	ENSRNOG00000070022	ENSRNOG00000014765	-0.9830099898116885	7.160998431832155e-5
542	ENSRNOG00000065163	ENSRNOG00000039560	-0.983009507380819	7.161504921882056e-5
543	ENSRNOG00000064337	ENSRNOG00000007980	-0.9829947067585177	7.177054057039278e-5
544	ENSRNOG00000068224	ENSRNOG00000016291	-0.9829567429149433	7.217029946593456e-5
545	ENSRNOG00000066622	ENSRNOG00000015082	-0.9829541633011982	7.21975108832762e-5
546	MSTRG.9891	ENSRNOG00000009691	-0.9829532320415947	7.220733591051243e-5
547	ENSRNOG00000063348	ENSRNOG00000017481	-0.9829436915292313	7.230803673863306e-5
548	ENSRNOG00000069541	ENSRNOG00000065867	-0.9829204081730101	7.255414617102218e-5
549	ENSRNOG00000065346	ENSRNOG00000004608	-0.9828787926011874	7.299527483128898e-5
550	ENSRNOG00000065697	ENSRNOG00000048148	-0.9828694303499768	7.309473553585022e-5
551	ENSRNOG00000069426	ENSRNOG00000007713	-0.9828540096629308	7.325873486929702e-5
552	ENSRNOG00000061154	ENSRNOG00000002730	-0.9828524727464342	7.327509203447491e-5
553	ENSRNOG00000063348	ENSRNOG00000014659	-0.9828524504700977	7.327532913414814e-5
554	ENSRNOG00000063993	ENSRNOG00000024578	-0.9828484425418776	7.331799523502269e-5
555	ENSRNOG00000062871	ENSRNOG00000023861	-0.982840634600157	7.340115667986424e-5
556	ENSRNOG00000065376	ENSRNOG00000020705	-0.9828275721756654	7.354040884743895e-5
557	ENSRNOG00000065163	ENSRNOG00000056697	-0.9828151320785354	7.367317319939559e-5
558	MSTRG.5149	ENSRNOG00000006615	-0.982810292795212	7.372485807355389e-5
559	MSTRG.12916	ENSRNOG00000052510	-0.9827917097735024	7.392353097968041e-5
560	ENSRNOG00000066622	ENSRNOG00000000219	-0.9827815281495507	7.403251909821051e-5
561	ENSRNOG00000069674	ENSRNOG00000007713	-0.9827797134622177	7.405195429299738e-5
562	ENSRNOG00000066075	ENSRNOG00000003669	-0.9827416312363995	7.446051554160782e-5
563	ENSRNOG00000061154	ENSRNOG00000004009	-0.9827220660015545	7.467094119384399e-5
564	ENSRNOG00000064438	ENSRNOG00000049495	-0.9827211950069193	7.468031705326617e-5
565	ENSRNOG00000066622	ENSRNOG00000048114	-0.9826800210556524	7.512433798373408e-5
566	MSTRG.9597	ENSRNOG00000002227	-0.9826777561031705	7.514880889569753e-5
567	ENSRNOG00000063348	ENSRNOG00000018748	-0.9826734872718191	7.519494297314466e-5
568	MSTRG.14772	ENSRNOG00000037211	-0.9826467594088374	7.548418043112903e-5
569	ENSRNOG00000051306	ENSRNOG00000007206	-0.9826459373590128	7.549308681031874e-5
570	ENSRNOG00000070022	ENSRNOG00000027839	-0.9826432917969415	7.552175402647521e-5
571	ENSRNOG00000063348	ENSRNOG00000022555	-0.9826353993113263	7.560731532674225e-5
572	ENSRNOG00000065346	ENSRNOG00000048812	-0.9826326870704897	7.563673169275198e-5
573	ENSRNOG00000066075	ENSRNOG00000028636	-0.9826123271922875	7.58577685897599e-5
574	MSTRG.13181	ENSRNOG00000020151	-0.9826066983344134	7.591894620473383e-5
575	ENSRNOG00000063209	ENSRNOG00000047459	-0.9826025643302685	7.596389565600603e-5
576	ENSRNOG00000063993	ENSRNOG00000016550	-0.9826006436977325	7.598478429460265e-5
577	ENSRNOG00000066622	ENSRNOG00000017220	-0.9825962494174847	7.6032589014563e-5
578	ENSRNOG00000065163	ENSRNOG00000009079	-0.9825928117477721	7.606999942488812e-5
579	ENSRNOG00000070022	ENSRNOG00000002832	-0.9825811931215315	7.619652034240865e-5
580	ENSRNOG00000066622	ENSRNOG00000003869	-0.9825473195865083	7.656610254214158e-5
581	ENSRNOG00000066622	ENSRNOG00000059540	-0.9825387664052281	7.665959213887241e-5
582	ENSRNOG00000067235	ENSRNOG00000049911	-0.9825269737741413	7.678860187709802e-5
583	ENSRNOG00000063209	ENSRNOG00000002949	-0.9825021965572772	7.706008316432644e-5
584	ENSRNOG00000063209	ENSRNOG00000001436	-0.9825020634826231	7.706154279341071e-5
585	ENSRNOG00000069674	ENSRNOG00000001368	-0.9824902001919232	7.719173158848847e-5
586	ENSRNOG00000063348	ENSRNOG00000007544	-0.9824793323267061	7.731111164988036e-5
587	ENSRNOG00000063579	ENSRNOG00000058497	-0.9824747517754167	7.736146054959647e-5
588	ENSRNOG00000066622	ENSRNOG00000056728	-0.9824741141492723	7.736847081529774e-5
589	ENSRNOG00000070022	ENSRNOG00000015562	-0.9824645462416136	7.74737089919153e-5
590	ENSRNOG00000065163	ENSRNOG00000016734	-0.9824617292232307	7.750470987422098e-5
591	ENSRNOG00000068121	ENSRNOG00000054460	-0.982449772820857	7.76363707712946e-5
592	ENSRNOG00000070022	ENSRNOG00000006037	-0.9824357603034671	7.779084290326921e-5
593	ENSRNOG00000069674	ENSRNOG00000070431	-0.982432381394009	7.78281189828256e-5
594	ENSRNOG00000070022	ENSRNOG00000017531	-0.9824304535606176	7.784939158872461e-5
595	MSTRG.7821	ENSRNOG00000018938	-0.9824098564237943	7.807688658356682e-5
596	ENSRNOG00000063348	ENSRNOG00000003969	-0.9824081269768604	7.80960063282432e-5
597	ENSRNOG00000065163	ENSRNOG00000037100	-0.9824044206580136	7.81369906142082e-5
598	ENSRNOG00000066622	ENSRNOG00000007900	-0.9824040190596968	7.814143223860981e-5
599	ENSRNOG00000063392	ENSRNOG00000018279	-0.98237476945095	7.846533439703762e-5
600	ENSRNOG00000065163	ENSRNOG00000005343	-0.9823040781667871	7.925145515130794e-5
601	ENSRNOG00000066622	ENSRNOG00000003232	-0.9822990217012022	7.930786479359853e-5
602	ENSRNOG00000066622	ENSRNOG00000065000	-0.9822932925588617	7.93718077332084e-5
603	ENSRNOG00000066622	ENSRNOG00000020315	-0.9822879446603683	7.943152337253068e-5
604	ENSRNOG00000067835	ENSRNOG00000019147	-0.9822687633984523	7.964592549880578e-5
605	ENSRNOG00000065697	ENSRNOG00000019864	-0.9822629640553426	7.971081666457991e-5
606	MSTRG.2148	ENSRNOG00000026646	-0.9822572064260401	7.977527228675285e-5
607	ENSRNOG00000067835	ENSRNOG00000000610	-0.9822513920545645	7.984039468933446e-5
608	ENSRNOG00000062838	ENSRNOG00000066013	-0.9822495065911856	7.986151915773121e-5
609	MSTRG.4435	ENSRNOG00000012742	-0.9822402887845085	7.996484220029743e-5
610	ENSRNOG00000063348	ENSRNOG00000013663	-0.9822396495030263	7.997201090836903e-5
611	ENSRNOG00000068224	ENSRNOG00000018267	-0.9822368539553997	8.000336383551243e-5
612	MSTRG.9891	ENSRNOG00000060703	-0.982235274267214	8.002108376903294e-5
613	ENSRNOG00000063513	ENSRNOG00000060410	-0.9822351808990539	8.002213118674106e-5
614	ENSRNOG00000070022	ENSRNOG00000006615	-0.9822179262056506	8.02158373875983e-5
615	ENSRNOG00000062838	ENSRNOG00000007730	-0.982215916844365	8.023841323545611e-5
616	MSTRG.2148	ENSRNOG00000021125	-0.9822127097404344	8.027445398051114e-5
617	ENSRNOG00000061154	ENSRNOG00000019129	-0.9822010507139488	8.040555702315544e-5
618	ENSRNOG00000067921	ENSRNOG00000060842	-0.9821976716542329	8.044357763514753e-5
619	ENSRNOG00000063348	ENSRNOG00000006778	-0.982138184672522	8.111467310478737e-5
620	MSTRG.12581	ENSRNOG00000032238	-0.9821086769669211	8.144879630789248e-5
621	ENSRNOG00000065786	ENSRNOG00000021800	-0.9821053434502737	8.14865941058951e-5
622	ENSRNOG00000066075	ENSRNOG00000009308	-0.9820956935744112	8.159607032087735e-5
623	ENSRNOG00000066622	ENSRNOG00000030391	-0.9820930698758287	8.162585090931707e-5
624	MSTRG.7821	ENSRNOG00000020907	-0.9820827753004524	8.174276331773811e-5
625	ENSRNOG00000066075	ENSRNOG00000007301	-0.9820760961862002	8.181866944467764e-5
626	ENSRNOG00000065346	ENSRNOG00000021866	-0.9820756832105665	8.182336416906466e-5
627	ENSRNOG00000064568	ENSRNOG00000018267	-0.9820660635272056	8.193276663415183e-5
628	ENSRNOG00000065346	ENSRNOG00000008226	-0.9820640589494731	8.195557522538977e-5
629	MSTRG.15606	ENSRNOG00000068162	-0.9820637441620461	8.195915730047076e-5
630	MSTRG.14772	ENSRNOG00000019100	-0.9820300464524888	8.234315579080942e-5
631	ENSRNOG00000066884	ENSRNOG00000011133	-0.9819762575120343	8.295832295246441e-5
632	ENSRNOG00000063348	ENSRNOG00000030091	-0.9819647451485728	8.309034139619698e-5
633	ENSRNOG00000067835	ENSRNOG00000070622	-0.981960763919248	8.313602544696153e-5
634	ENSRNOG00000069674	ENSRNOG00000002092	-0.9819569304965966	8.31800276011041e-5
635	ENSRNOG00000070022	ENSRNOG00000015375	-0.9819532289260151	8.322252947268183e-5
636	ENSRNOG00000063348	ENSRNOG00000020776	-0.9819484707852335	8.327718204403922e-5
637	ENSRNOG00000069051	ENSRNOG00000002524	-0.9818749545300708	8.412432181770235e-5
638	ENSRNOG00000066884	ENSRNOG00000026770	-0.9818730576110306	8.414624807251414e-5
639	MSTRG.12581	ENSRNOG00000007461	-0.9818581067248121	8.43191829222878e-5
640	ENSRNOG00000065163	ENSRNOG00000031211	-0.9818523532809249	8.438578868874558e-5
641	MSTRG.7821	ENSRNOG00000025480	-0.9818488694153471	8.44261355372744e-5
642	ENSRNOG00000063348	ENSRNOG00000006926	-0.9818450382726451	8.447051751225843e-5
643	ENSRNOG00000063348	ENSRNOG00000003782	-0.9818414627872762	8.451195037739723e-5
644	ENSRNOG00000069674	ENSRNOG00000004874	-0.9818407095522532	8.452068044073613e-5
645	ENSRNOG00000063348	ENSRNOG00000058249	-0.981819527789511	8.476639944365871e-5
646	ENSRNOG00000067835	ENSRNOG00000009515	-0.9818106837960645	8.486912018401682e-5
647	ENSRNOG00000063209	ENSRNOG00000016643	-0.9818030227005828	8.495816188647254e-5
648	ENSRNOG00000063634	ENSRNOG00000071128	-0.9817741095892899	8.529470902662872e-5
649	ENSRNOG00000068224	ENSRNOG00000009219	-0.9817458011977461	8.562498691322418e-5
650	ENSRNOG00000070022	ENSRNOG00000020433	-0.9817414915718415	8.567533473646805e-5
651	ENSRNOG00000064499	ENSRNOG00000022911	-0.9817358825842755	8.574088899560017e-5
652	ENSRNOG00000063579	ENSRNOG00000069278	-0.9817288142684987	8.582354156860816e-5
653	MSTRG.9891	ENSRNOG00000017808	-0.9817183214799745	8.594632549518977e-5
654	ENSRNOG00000070022	ENSRNOG00000009875	-0.9817182276501177	8.594742394052446e-5
655	ENSRNOG00000070022	ENSRNOG00000030776	-0.9817126049534932	8.601326291479694e-5
656	ENSRNOG00000063209	ENSRNOG00000018748	-0.9817067929954727	8.608134967325043e-5
657	ENSRNOG00000066622	ENSRNOG00000006778	-0.9817000249320894	8.616067767786006e-5
658	ENSRNOG00000066622	ENSRNOG00000009296	-0.9816801920630065	8.639338855531697e-5
659	ENSRNOG00000063579	ENSRNOG00000026036	-0.9816798841431477	8.6397004515959e-5
660	ENSRNOG00000067835	ENSRNOG00000002425	-0.9816653821775003	8.656740613322e-5
661	ENSRNOG00000065394	ENSRNOG00000068201	-0.9816523971619316	8.67201532850359e-5
662	ENSRNOG00000067921	ENSRNOG00000033503	-0.9816277289981782	8.701077605599572e-5
663	ENSRNOG00000063579	ENSRNOG00000002196	-0.9816179618349921	8.712600622695632e-5
664	ENSRNOG00000063579	ENSRNOG00000003232	-0.9816172291920017	8.713465340703941e-5
665	ENSRNOG00000066622	ENSRNOG00000064025	-0.9816081453758824	8.724190969133794e-5
666	MSTRG.9891	ENSRNOG00000057458	-0.9816040817613403	8.728991592255042e-5
667	ENSRNOG00000067835	ENSRNOG00000003269	-0.9816024705806053	8.730895425546059e-5
668	ENSRNOG00000063579	ENSRNOG00000018689	-0.9815977126742277	8.736518997531917e-5
669	ENSRNOG00000067105	ENSRNOG00000051624	-0.9815710844214917	8.768031963102274e-5
670	ENSRNOG00000063209	ENSRNOG00000059890	-0.9815511923674802	8.791617234149562e-5
671	ENSRNOG00000062838	ENSRNOG00000013659	-0.9815427972292461	8.801582386230855e-5
672	ENSRNOG00000069426	ENSRNOG00000057996	-0.9815317675542395	8.814685013547319e-5
673	MSTRG.12581	ENSRNOG00000059445	-0.9815120150208487	8.83817897561201e-5
674	ENSRNOG00000069541	ENSRNOG00000004699	-0.9815055645834285	8.845859308270754e-5
675	ENSRNOG00000063209	ENSRNOG00000026646	-0.9814796787676225	8.876720790462755e-5
676	ENSRNOG00000067835	ENSRNOG00000007060	-0.981459565295987	8.900744687201367e-5
677	ENSRNOG00000067105	ENSRNOG00000014525	-0.9814563492845414	8.904589543390351e-5
678	ENSRNOG00000063579	ENSRNOG00000014603	-0.9814557720387379	8.905279766180385e-5
679	ENSRNOG00000067151	ENSRNOG00000059890	-0.9814524723705266	8.909225849507152e-5
680	ENSRNOG00000063209	ENSRNOG00000029339	-0.9814127547206929	8.956806194015954e-5
681	ENSRNOG00000070797	ENSRNOG00000036828	-0.981393123606326	8.980379445766573e-5
682	ENSRNOG00000068224	ENSRNOG00000031974	-0.9813893347325614	8.98493342322837e-5
683	MSTRG.15606	ENSRNOG00000055530	-0.9813842453603755	8.991052682838507e-5
684	MSTRG.12581	ENSRNOG00000031247	-0.98136924914609	9.009097995038573e-5
685	ENSRNOG00000066622	ENSRNOG00000033498	-0.9813656707450115	9.013407163838139e-5
686	ENSRNOG00000063209	ENSRNOG00000007237	-0.9813557455672115	9.025365660475515e-5
687	ENSRNOG00000061154	ENSRNOG00000013439	-0.9813413323613668	9.042748473420126e-5
688	ENSRNOG00000067835	ENSRNOG00000068024	-0.9813310789971996	9.055126528600965e-5
689	ENSRNOG00000067835	ENSRNOG00000069743	-0.9813276654350932	9.059249687415338e-5
690	ENSRNOG00000071003	ENSRNOG00000030291	-0.9813175168658109	9.071514513814272e-5
691	ENSRNOG00000066075	ENSRNOG00000060356	-0.9813062221405814	9.085176145706697e-5
692	ENSRNOG00000066622	ENSRNOG00000005101	-0.9812976391494983	9.095565981009912e-5
693	MSTRG.4435	ENSRNOG00000036680	-0.9812621520027691	9.138598932389996e-5
694	ENSRNOG00000067105	ENSRNOG00000031706	-0.9812538242470228	9.14871502264436e-5
695	ENSRNOG00000067921	ENSRNOG00000014230	-0.9812530122964783	9.149701691946177e-5
696	ENSRNOG00000063513	ENSRNOG00000063843	-0.9812320795450297	9.175160759533618e-5
697	ENSRNOG00000070022	ENSRNOG00000007151	-0.9811957360536111	9.2194631617470435e-05
698	ENSRNOG00000066884	ENSRNOG00000015972	-0.9811954132936056	9.219857173992096e-5
699	ENSRNOG00000067835	ENSRNOG00000063905	-0.9811916549466891	9.224445949995719e-5
700	ENSRNOG00000065163	ENSRNOG00000011977	-0.9811797552612689	9.23898392910516e-5
701	ENSRNOG00000065998	ENSRNOG00000007508	-0.9811753436566208	9.244377107475721e-5
702	ENSRNOG00000066622	ENSRNOG00000049771	-0.9811680051529433	9.25335257517812e-5
703	ENSRNOG00000067105	ENSRNOG00000007546	-0.9811617532973664	9.261003101945775e-5
704	ENSRNOG00000065163	ENSRNOG00000003669	-0.9811596385262921	9.263591845654062e-5
705	ENSRNOG00000003984	ENSRNOG00000042030	-0.9811458511766247	9.280479866546898e-5
706	ENSRNOG00000071003	ENSRNOG00000020705	-0.9811318286650705	9.297674765917918e-5
707	ENSRNOG00000065998	ENSRNOG00000019065	-0.9811276750208464	9.302771757879746e-5
708	ENSRNOG00000064337	ENSRNOG00000006144	-0.9810954219035205	9.34240672640918e-5
709	MSTRG.2148	ENSRNOG00000017523	-0.9810803722239437	9.360935277902271e-5
710	ENSRNOG00000070022	ENSRNOG00000065735	-0.9810664305302896	9.378119271641339e-5
711	ENSRNOG00000065346	ENSRNOG00000042419	-0.9810593476388882	9.386856575099856e-5
712	ENSRNOG00000065786	ENSRNOG00000014712	-0.9810388466973451	9.412173467326923e-5
713	ENSRNOG00000065346	ENSRNOG00000003232	-0.9810328998852273	9.419524880938113e-5
714	MSTRG.12581	ENSRNOG00000011668	-0.9810270986683235	9.426699610881606e-5
715	ENSRNOG00000067105	ENSRNOG00000007369	-0.9809940783001825	9.467600077162075e-5
716	MSTRG.2148	ENSRNOG00000018279	-0.9809871051729395	9.476250811268905e-5
717	ENSRNOG00000062687	ENSRNOG00000063089	-0.9809754776692996	9.490686165358753e-5
718	ENSRNOG00000067835	ENSRNOG00000014948	-0.9809653947697556	9.503214534456461e-5
719	ENSRNOG00000063209	ENSRNOG00000007512	-0.980961381443876	9.508203981756225e-5
720	ENSRNOG00000061154	ENSRNOG00000017431	-0.9809558487315034	9.515084923039652e-5
721	ENSRNOG00000067835	ENSRNOG00000005309	-0.9809460104168939	9.527328006830871e-5
722	ENSRNOG00000070022	ENSRNOG00000009683	-0.9809452575408503	9.52826529454498e-5
723	ENSRNOG00000063634	ENSRNOG00000003538	-0.9809344510036373	9.541724879635893e-5
724	ENSRNOG00000003984	ENSRNOG00000010270	-0.9809130150282938	9.5684570266652e-5
725	MSTRG.4435	ENSRNOG00000020514	-0.9808978510264018	9.587394543375538e-5
726	ENSRNOG00000067835	ENSRNOG00000011039	-0.9808961576288258	9.589510724561379e-5
727	ENSRNOG00000063209	ENSRNOG00000020317	-0.9808907477809476	9.596273094159002e-5
728	ENSRNOG00000062871	ENSRNOG00000000184	-0.9808724136695494	9.619212093880947e-5
729	ENSRNOG00000069426	ENSRNOG00000042533	-0.980868245991259	9.624431106369791e-5
730	ENSRNOG00000070022	ENSRNOG00000014508	-0.9808406486817122	9.659032718634109e-5
731	ENSRNOG00000067047	ENSRNOG00000048819	-0.9808264230383495	9.676897830912523e-5
732	ENSRNOG00000067743	ENSRNOG00000031974	-0.9808241089086305	9.679805867257585e-5
733	ENSRNOG00000066622	ENSRNOG00000001706	-0.980823830056243	9.680156320523992e-5
734	ENSRNOG00000066622	ENSRNOG00000030091	-0.9808159344926207	9.690082368685182e-5
735	ENSRNOG00000069096	ENSRNOG00000002345	-0.980810053944313	9.697479148673693e-5
736	ENSRNOG00000063209	ENSRNOG00000001245	-0.9808084594124952	9.699485392555829e-5
737	ENSRNOG00000066075	ENSRNOG00000068425	-0.9808045110756805	9.704454265468954e-5
738	ENSRNOG00000066622	ENSRNOG00000023993	-0.9808014427592343	9.708316705570041e-5
739	ENSRNOG00000063209	ENSRNOG00000021524	-0.9808009304820133	9.708961656684778e-5
740	ENSRNOG00000063348	ENSRNOG00000005061	-0.980744308793553	9.780405349557597e-5
741	MSTRG.2148	ENSRNOG00000020063	-0.9807310613213729	9.797165775182748e-5
742	ENSRNOG00000064438	ENSRNOG00000056651	-0.9807237588705726	9.80641200500898e-5
743	ENSRNOG00000062838	ENSRNOG00000011951	-0.9807236266044098	9.80657952598385e-5
744	ENSRNOG00000065998	ENSRNOG00000067378	-0.9807215277303848	9.809238071900594e-5
745	MSTRG.9891	ENSRNOG00000031287	-0.9807167278683421	9.815319449479887e-5
746	ENSRNOG00000070022	ENSRNOG00000042560	-0.9807063381585814	9.828490811569779e-5
747	ENSRNOG00000067835	ENSRNOG00000047697	-0.9807043038145784	9.831071047305961e-5
748	ENSRNOG00000067701	ENSRNOG00000069293	-0.9807002084957986	9.836266521223713e-5
749	ENSRNOG00000067835	ENSRNOG00000001436	-0.9806907894402696	9.848222101460635e-5
750	MSTRG.2148	ENSRNOG00000059890	-0.9806572175478017	9.890905310605547e-5
751	ENSRNOG00000063348	ENSRNOG00000046468	-0.9806440651734057	9.907657234986544e-5
752	MSTRG.9891	ENSRNOG00000009308	-0.9806341885737407	9.920247989292363e-5
753	ENSRNOG00000063706	ENSRNOG00000028622	-0.9806143361896834	9.945584805803875e-5
754	ENSRNOG00000064568	ENSRNOG00000022911	-0.9805928741392899	9.973019362874425e-5
755	ENSRNOG00000001277	ENSRNOG00000004456	-0.9805904063499696	9.97617678464291e-5
756	ENSRNOG00000067151	ENSRNOG00000009296	-0.9805781996083679	9.991803513997866e-5
757	ENSRNOG00000065163	ENSRNOG00000063044	-0.9805712510064369	1.000070543817344e-4
758	MSTRG.9891	ENSRNOG00000039582	-0.980556308709107	1.0019864189469985e-4
759	ENSRNOG00000066622	ENSRNOG00000014025	-0.9805514336953395	1.0026119580008874e-4
760	ENSRNOG00000066075	ENSRNOG00000007477	-0.9805394697750544	1.004148099839064e-4
761	ENSRNOG00000061154	ENSRNOG00000001153	-0.980529105714795	1.0054799574144013e-4
762	ENSRNOG00000065346	ENSRNOG00000013663	-0.980527252620698	1.0057182045652979e-4
763	ENSRNOG00000066622	ENSRNOG00000019843	-0.980507185183399	1.008300376423854e-4
764	ENSRNOG00000070376	ENSRNOG00000017716	-0.9804989391347603	1.0093625797025219e-4
765	ENSRNOG00000065163	ENSRNOG00000014963	-0.9804911533658266	1.0103661051630297e-4
766	ENSRNOG00000071119	ENSRNOG00000018454	-0.9804769685044118	1.012195953800088e-4
767	ENSRNOG00000064568	ENSRNOG00000009308	-0.9804671959768199	1.0134577602904926e-4
768	ENSRNOG00000065786	ENSRNOG00000060356	-0.9804610173797307	1.0142560106229936e-4
769	MSTRG.9891	ENSRNOG00000024178	-0.9804463786748908	1.0161487702431415e-4
770	ENSRNOG00000068224	ENSRNOG00000007490	-0.9804183218774061	1.0197823524915606e-4
771	ENSRNOG00000067743	ENSRNOG00000050360	-0.9804154365458799	1.0201564651124428e-4
772	ENSRNOG00000063993	ENSRNOG00000010064	-0.9804135756790714	1.0203977888734173e-4
773	ENSRNOG00000066622	ENSRNOG00000046566	-0.9803966579541026	1.0225933013163768e-4
774	ENSRNOG00000066031	ENSRNOG00000005309	-0.9803958971273845	1.0226921044176329e-4
775	MSTRG.2148	ENSRNOG00000042607	-0.9803925594893953	1.0231256067871897e-4
776	ENSRNOG00000065394	ENSRNOG00000002592	-0.9803766956019792	1.0251875544642353e-4
777	ENSRNOG00000063579	ENSRNOG00000050585	-0.9803564125722289	1.0278274993891223e-4
778	ENSRNOG00000067835	ENSRNOG00000006839	-0.9803463744939062	1.0291355075620068e-4
779	ENSRNOG00000065163	ENSRNOG00000006729	-0.9803390983661644	1.030084241209206e-4
780	ENSRNOG00000064568	ENSRNOG00000012892	-0.9803298851889065	1.0312862949213297e-4
781	MSTRG.15606	ENSRNOG00000068667	-0.9803265290835569	1.0317243776336582e-4
782	ENSRNOG00000070376	ENSRNOG00000015562	-0.9803255238550259	1.031855614797017e-4
783	ENSRNOG00000071185	ENSRNOG00000017716	-0.9803223649123947	1.0322680939589546e-4
784	MSTRG.9891	ENSRNOG00000042030	-0.9803010643580113	1.0350519832158511e-4
785	ENSRNOG00000066622	ENSRNOG00000009683	-0.9802902750165658	1.0364638098536716e-4
786	MSTRG.2148	ENSRNOG00000002693	-0.9802811259760704	1.0376618964524909e-4
787	ENSRNOG00000065163	ENSRNOG00000002339	-0.9802762115124468	1.0383057969898246e-4
788	ENSRNOG00000065346	ENSRNOG00000026036	-0.9802532916798262	1.0413119362495671e-4
789	ENSRNOG00000065163	ENSRNOG00000069925	-0.9801429754817419	1.0558534861249136e-4
790	ENSRNOG00000067921	ENSRNOG00000023803	-0.98013365061349	1.0570881793103837e-4
791	ENSRNOG00000069096	ENSRNOG00000030016	-0.9801293836931024	1.0576534435480234e-4
792	ENSRNOG00000051306	ENSRNOG00000067479	-0.9800982622667017	1.0617817370439653e-4
793	ENSRNOG00000070022	ENSRNOG00000002949	-0.9800857416180594	1.0634453225488727e-4
794	MSTRG.14772	ENSRNOG00000028622	-0.9800720192704404	1.0652703593594381e-4
795	ENSRNOG00000067835	ENSRNOG00000046566	-0.9800675583313873	1.0658640548388831e-4
796	ENSRNOG00000066622	ENSRNOG00000006388	-0.9800637043696662	1.066377128073892e-4
797	ENSRNOG00000062746	ENSRNOG00000004168	-0.9800602007516973	1.0668436882932397e-4
798	ENSRNOG00000065998	ENSRNOG00000017060	-0.9800588863880695	1.0670187472783255e-4
799	MSTRG.9891	ENSRNOG00000014336	-0.9800362532252234	1.0700359275261917e-4
800	ENSRNOG00000067105	ENSRNOG00000057347	-0.9800070466928309	1.0739369029622026e-4
801	ENSRNOG00000066622	ENSRNOG00000026646	-0.9799974997751029	1.0752138753811202e-4
802	ENSRNOG00000065998	ENSRNOG00000007014	-0.9799654220587789	1.0795111448369532e-4
803	ENSRNOG00000064438	ENSRNOG00000001156	-0.979954097094054	1.0810307286357457e-4
804	ENSRNOG00000071003	ENSRNOG00000023381	-0.9799489013884635	1.0817283151398627e-4
805	ENSRNOG00000063209	ENSRNOG00000049045	-0.9799425380075149	1.0825830419514126e-4
806	ENSRNOG00000070022	ENSRNOG00000020994	-0.9799045680781125	1.0876915208868354e-4
807	ENSRNOG00000003984	ENSRNOG00000012815	-0.9798924068100787	1.0893307332193736e-4
808	ENSRNOG00000066622	ENSRNOG00000051563	-0.9798814170295442	1.0908133079334803e-4
809	ENSRNOG00000066884	ENSRNOG00000018937	-0.9798696714699099	1.09239917078785e-4
810	ENSRNOG00000063179	ENSRNOG00000070431	-0.9798689231685227	1.0925002515693727e-4
811	ENSRNOG00000068224	ENSRNOG00000013072	-0.9798545632480181	1.0944410749025302e-4
812	ENSRNOG00000063209	ENSRNOG00000003967	-0.9798542113091766	1.0944886671993004e-4
813	ENSRNOG00000065163	ENSRNOG00000015365	-0.9798347698078286	1.0971196375586523e-4
814	ENSRNOG00000063993	ENSRNOG00000000442	-0.9798273376507058	1.0981264086828979e-4
815	ENSRNOG00000071119	ENSRNOG00000031779	-0.9798252885498073	1.098404079828974e-4
816	MSTRG.4435	ENSRNOG00000002092	-0.979814423914898	1.0998770328418672e-4
817	ENSRNOG00000067743	ENSRNOG00000069312	-0.9798135601973578	1.099994180291386e-4
818	ENSRNOG00000066622	ENSRNOG00000004341	-0.979806879342568	1.1009005671880345e-4
819	ENSRNOG00000063348	ENSRNOG00000001374	-0.9798005678662033	1.1017572498550621e-4
820	MSTRG.2148	ENSRNOG00000025075	-0.9797950748550498	1.1025031624001258e-4
821	ENSRNOG00000067921	ENSRNOG00000068024	-0.9797809991583428	1.1044159182871383e-4
822	ENSRNOG00000065163	ENSRNOG00000005770	-0.979775828040238	1.1051191217870127e-4
823	ENSRNOG00000066622	ENSRNOG00000017523	-0.9797677800155026	1.1062140775930374e-4
824	ENSRNOG00000070022	ENSRNOG00000056728	-0.9797677006987137	1.106224872078343e-4
825	ENSRNOG00000063348	ENSRNOG00000025823	-0.9797663882195091	1.1064035008501172e-4
826	ENSRNOG00000066622	ENSRNOG00000019253	-0.9797538497082245	1.1081108629062975e-4
827	MSTRG.7821	ENSRNOG00000050360	-0.9797427089670963	1.1096292090684301e-4
828	ENSRNOG00000066622	ENSRNOG00000004608	-0.9796698267215711	1.1195927747409407e-4
829	ENSRNOG00000063179	ENSRNOG00000001389	-0.9796688677767446	1.1197242240923444e-4
830	ENSRNOG00000069144	ENSRNOG00000007206	-0.9796603039438316	1.1208985374366875e-4
831	MSTRG.2148	ENSRNOG00000014980	-0.9796534523118646	1.1218385943978504e-4
832	ENSRNOG00000065786	ENSRNOG00000031974	-0.9796440070688345	1.1231352704266229e-4
833	MSTRG.7821	ENSRNOG00000060356	-0.97964280126574	1.1233008716082793e-4
834	ENSRNOG00000070376	ENSRNOG00000039496	-0.9796291109397673	1.1251820790447731e-4
835	ENSRNOG00000063348	ENSRNOG00000011284	-0.979625936002409	1.1256186199881668e-4
836	ENSRNOG00000069611	ENSRNOG00000024462	-0.9796105342910554	1.1277377260343613e-4
837	ENSRNOG00000064568	ENSRNOG00000024178	-0.9796064724824097	1.1282969823978029e-4
838	MSTRG.2148	ENSRNOG00000065713	-0.9796004832140439	1.1291219257447693e-4
839	ENSRNOG00000066884	ENSRNOG00000010607	-0.9795944243989708	1.1299568141653893e-4
840	ENSRNOG00000071003	ENSRNOG00000048812	-0.9795830201849213	1.1315292826985512e-4
841	ENSRNOG00000065697	ENSRNOG00000005985	-0.9795671435492739	1.1337206026618141e-4
842	ENSRNOG00000069674	ENSRNOG00000007206	-0.9795625910330343	1.13434941515278e-4
843	ENSRNOG00000001277	ENSRNOG00000003280	-0.9795429170488703	1.137069259407042e-4
844	MSTRG.7821	ENSRNOG00000017258	-0.979529897498514	1.1388712931248435e-4
845	ENSRNOG00000063760	ENSRNOG00000004317	-0.9795071958220365	1.1420175003151734e-4
846	MSTRG.4435	ENSRNOG00000004918	-0.9794949318650932	1.1437193063934536e-4
847	ENSRNOG00000063579	ENSRNOG00000006778	-0.9794909875113048	1.1442669652783621e-4
848	ENSRNOG00000063706	ENSRNOG00000030522	-0.9794891380819456	1.1445238055296514e-4
849	ENSRNOG00000063179	ENSRNOG00000024125	-0.9794586751924267	1.1487592998182805e-4
850	ENSRNOG00000063348	ENSRNOG00000020063	-0.9794457114415657	1.1505645827236677e-4
851	ENSRNOG00000071212	ENSRNOG00000021670	-0.9794401034510686	1.1513460542023068e-4
852	ENSRNOG00000066622	ENSRNOG00000009063	-0.9794263443720621	1.1532647178102984e-4
853	ENSRNOG00000065163	ENSRNOG00000007713	-0.9794175206999078	1.1544961561416045e-4
854	ENSRNOG00000062871	ENSRNOG00000019843	-0.9794064080956536	1.1560481548666957e-4
855	ENSRNOG00000063579	ENSRNOG00000003967	-0.9793716848684002	1.1609056552508434e-4
856	ENSRNOG00000066622	ENSRNOG00000043128	-0.9793657991689801	1.1617302215150005e-4
857	ENSRNOG00000063579	ENSRNOG00000005971	-0.9793571117783708	1.1629479331887183e-4
858	ENSRNOG00000066075	ENSRNOG00000011277	-0.9793402338735968	1.1653158846902656e-4
859	MSTRG.5149	ENSRNOG00000027916	-0.979339857668003	1.1653686986523581e-4
860	ENSRNOG00000065163	ENSRNOG00000018267	-0.9793236940212277	1.1676391952430976e-4
861	ENSRNOG00000070022	ENSRNOG00000001602	-0.9793133677614316	1.1690910979655911e-4
862	MSTRG.2148	ENSRNOG00000006839	-0.9793054948193011	1.170198779969489e-4
863	ENSRNOG00000067151	ENSRNOG00000015514	-0.9792984867669389	1.1711853028240071e-4
864	ENSRNOG00000067235	ENSRNOG00000024839	-0.979278455826305	1.1740077907052004e-4
865	ENSRNOG00000067835	ENSRNOG00000042189	-0.9792777931385541	1.1741012369004267e-4
866	ENSRNOG00000066622	ENSRNOG00000011425	-0.9792479728094067	1.178310820151296e-4
867	ENSRNOG00000064568	ENSRNOG00000066139	-0.9792268416896942	1.1812992329840455e-4
868	ENSRNOG00000066622	ENSRNOG00000008074	-0.9792129248900694	1.183269845683732e-4
869	ENSRNOG00000068224	ENSRNOG00000015972	-0.9792116961586205	1.1834439276281472e-4
870	ENSRNOG00000064438	ENSRNOG00000065735	-0.9792023248223087	1.1847721249935717e-4
871	ENSRNOG00000066622	ENSRNOG00000055365	-0.9791542948174727	1.1915933583561689e-4
872	ENSRNOG00000063579	ENSRNOG00000022555	-0.9791354796071153	1.1942718675506114e-4
873	ENSRNOG00000064568	ENSRNOG00000029212	-0.9791261110562723	1.1956069001417546e-4
874	ENSRNOG00000065376	ENSRNOG00000002693	-0.9791185797503651	1.196680767572289e-4
875	ENSRNOG00000063209	ENSRNOG00000063905	-0.9791184909081444	1.1966934387608319e-4
876	MSTRG.1333	ENSRNOG00000064059	-0.9790937717683301	1.200222133941331e-4
877	ENSRNOG00000065346	ENSRNOG00000018131	-0.9790937129177745	1.200230542339753e-4
878	ENSRNOG00000066075	ENSRNOG00000025480	-0.9790775746850309	1.2025376532376342e-4
879	ENSRNOG00000063579	ENSRNOG00000011521	-0.9790482371192556	1.2067385011826914e-4
880	MSTRG.9891	ENSRNOG00000022911	-0.9790383743914034	1.2081527083052102e-4
881	MSTRG.2148	ENSRNOG00000069578	-0.9790271283717471	1.209766469756346e-4
882	ENSRNOG00000065163	ENSRNOG00000050035	-0.9789828715384953	1.2161296379664677e-4
883	ENSRNOG00000064499	ENSRNOG00000031974	-0.9789662521998339	1.2185242794404694e-4
884	ENSRNOG00000064499	ENSRNOG00000009219	-0.9789449554765115	1.2215969813977878e-4
885	ENSRNOG00000067835	ENSRNOG00000015020	-0.9789350996372163	1.2230205490770807e-4
886	ENSRNOG00000065346	ENSRNOG00000049771	-0.9789321860202944	1.223441578375173e-4
887	ENSRNOG00000063579	ENSRNOG00000018748	-0.9789271357399292	1.2241715688121602e-4
888	ENSRNOG00000067105	ENSRNOG00000065120	-0.9789122766632965	1.226320873235487e-4
889	ENSRNOG00000065163	ENSRNOG00000012218	-0.9789029918432407	1.227665025833602e-4
890	MSTRG.4435	ENSRNOG00000010607	-0.9788964482620054	1.228612860004752e-4
891	ENSRNOG00000065346	ENSRNOG00000011260	-0.9788954786382211	1.2287533465871192e-4
892	MSTRG.2148	ENSRNOG00000018812	-0.9788928987153885	1.2291271923903224e-4
893	MSTRG.9891	ENSRNOG00000068425	-0.9788925185583125	1.229182285089614e-4
894	ENSRNOG00000063238	ENSRNOG00000068063	-0.9788884071100575	1.2297782139047975e-4
895	ENSRNOG00000065163	ENSRNOG00000001111	-0.9788764683386326	1.2315096408155313e-4
896	ENSRNOG00000063634	ENSRNOG00000021447	-0.9788494394263562	1.235434892101761e-4
897	ENSRNOG00000063634	ENSRNOG00000028910	-0.9788490905291737	1.235485609105691e-4
898	MSTRG.7821	ENSRNOG00000011000	-0.9788383892631218	1.2370417883511564e-4
899	ENSRNOG00000063209	ENSRNOG00000021125	-0.9788342318890539	1.2376466691987886e-4
900	ENSRNOG00000071185	ENSRNOG00000046791	-0.9788339973071335	1.2376808051595134e-4
901	MSTRG.12581	ENSRNOG00000023257	-0.9788104158301313	1.241115206926935e-4
902	ENSRNOG00000070376	ENSRNOG00000020652	-0.9788060432355744	1.2417526545283053e-4
903	MSTRG.5534	ENSRNOG00000009019	-0.9788015324975563	1.2424104455543983e-4
904	ENSRNOG00000062746	ENSRNOG00000050317	-0.9787994907891402	1.2427082517074695e-4
905	ENSRNOG00000066622	ENSRNOG00000058249	-0.9787548920697163	1.2492240994710357e-4
906	MSTRG.2148	ENSRNOG00000014025	-0.9787371653543987	1.25181960735965e-4
907	ENSRNOG00000064568	ENSRNOG00000068162	-0.9787141232335742	1.2551981882213958e-4
908	ENSRNOG00000063634	ENSRNOG00000003496	-0.9787132631406472	1.2553244055979462e-4
909	ENSRNOG00000063579	ENSRNOG00000003269	-0.9787044010540722	1.2566253445323028e-4
910	MSTRG.5149	ENSRNOG00000011441	-0.9786951733636887	1.2579808074653087e-4
911	ENSRNOG00000066884	ENSRNOG00000028344	-0.978691181951799	1.2585673791765117e-4
912	ENSRNOG00000067105	ENSRNOG00000021812	-0.9786783541319017	1.2604536399085653e-4
913	ENSRNOG00000069426	ENSRNOG00000006503	-0.978663747876958	1.2626034610097037e-4
914	ENSRNOG00000065697	ENSRNOG00000022567	-0.978647138313707	1.2650507939326872e-4
915	ENSRNOG00000063348	ENSRNOG00000071023	-0.9786410271132991	1.2659519587909784e-4
916	ENSRNOG00000063392	ENSRNOG00000020705	-0.9785984843684485	1.2722359695205299e-4
917	ENSRNOG00000063348	ENSRNOG00000058497	-0.9785874891083655	1.2738631029973746e-4
918	ENSRNOG00000065163	ENSRNOG00000028636	-0.9785732627521688	1.2759702306741616e-4
919	ENSRNOG00000068224	ENSRNOG00000029212	-0.9785446551630576	1.2802137133549607e-4
920	ENSRNOG00000066622	ENSRNOG00000008565	-0.9785334712733033	1.2818749507270688e-4
921	ENSRNOG00000067408	ENSRNOG00000011351	-0.978524601197045	1.283193411345529e-4
922	ENSRNOG00000068224	ENSRNOG00000007713	-0.9784981541916116	1.287129329563541e-4
923	ENSRNOG00000063209	ENSRNOG00000008271	-0.9784885576316349	1.2885592942257773e-4
924	ENSRNOG00000067151	ENSRNOG00000007237	-0.9784785212696296	1.290055805818202e-4
925	ENSRNOG00000062871	ENSRNOG00000012106	-0.9784780126631722	1.290131671176642e-4
926	ENSRNOG00000063209	ENSRNOG00000004608	-0.978477885772847	1.2901505989559858e-4
927	ENSRNOG00000066884	ENSRNOG00000047450	-0.9784693895477626	1.2914183274093105e-4
928	ENSRNOG00000064499	ENSRNOG00000026080	-0.9784455996762342	1.2949719832788809e-4
929	ENSRNOG00000063348	ENSRNOG00000011302	-0.9784364357813043	1.29634241058163e-4
930	ENSRNOG00000066622	ENSRNOG00000017531	-0.978436269295487	1.2963673159260836e-4
931	ENSRNOG00000070376	ENSRNOG00000006143	-0.9784215103817798	1.2985763004236262e-4
932	ENSRNOG00000062687	ENSRNOG00000001391	-0.9783977455524472	1.3021379245481413e-4
933	ENSRNOG00000067835	ENSRNOG00000014025	-0.9783971823772692	1.3022223979120007e-4
934	ENSRNOG00000071185	ENSRNOG00000056651	-0.9783906526122925	1.303202067450826e-4
935	ENSRNOG00000067835	ENSRNOG00000042607	-0.9783813842527009	1.3045933663713427e-4
936	MSTRG.17027	ENSRNOG00000069483	-0.9783774557322776	1.3051833544830416e-4
937	MSTRG.2148	ENSRNOG00000008226	-0.9783772541783009	1.305213628297608e-4
938	ENSRNOG00000066622	ENSRNOG00000055314	-0.9783609869548802	1.30765837881075e-4
939	ENSRNOG00000064568	ENSRNOG00000022353	-0.9783487088004211	1.3095054311529353e-4
940	MSTRG.4435	ENSRNOG00000022353	-0.9783351822334408	1.3115420870057903e-4
941	ENSRNOG00000066622	ENSRNOG00000000184	-0.9783261334318777	1.3129055923188915e-4
942	ENSRNOG00000066075	ENSRNOG00000025233	-0.978321265578187	1.313639447131365e-4
943	ENSRNOG00000069674	ENSRNOG00000022353	-0.9783197326347759	1.3138705971194042e-4
944	MSTRG.5534	ENSRNOG00000042536	-0.9783189734670265	1.3139850797383446e-4
945	ENSRNOG00000069674	ENSRNOG00000007748	-0.978317531586002	1.3142025320078687e-4
946	ENSRNOG00000063579	ENSRNOG00000004341	-0.9783151016597625	1.3145690414173572e-4
947	MSTRG.9597	ENSRNOG00000021274	-0.9782980096877514	1.3171487710295082e-4
948	ENSRNOG00000063556	ENSRNOG00000068063	-0.9782626760998747	1.3224913115950088e-4
949	MSTRG.9891	ENSRNOG00000029212	-0.9782605015260633	1.3228205346837996e-4
950	ENSRNOG00000067105	ENSRNOG00000014230	-0.9782598792062248	1.3229147607862757e-4
951	ENSRNOG00000063348	ENSRNOG00000019466	-0.9782548687753179	1.3236735412092138e-4
952	MSTRG.9891	ENSRNOG00000011305	-0.9782546151109859	1.3237119630726824e-4
953	MSTRG.7821	ENSRNOG00000006110	-0.9782509462868266	1.3242677445024498e-4
954	ENSRNOG00000064499	ENSRNOG00000036670	-0.9782196922252703	1.3290079887884332e-4
955	ENSRNOG00000063579	ENSRNOG00000069578	-0.9782106877468199	1.3303755550686525e-4
956	ENSRNOG00000069674	ENSRNOG00000049695	-0.9781765918406371	1.335561514295147e-4
957	ENSRNOG00000061154	ENSRNOG00000010213	-0.97817515213134	1.3357807576142022e-4
958	ENSRNOG00000066075	ENSRNOG00000027869	-0.9781506494943408	1.3395153843021035e-4
959	ENSRNOG00000066075	ENSRNOG00000012835	-0.9781476390615133	1.3399746552966718e-4
960	ENSRNOG00000063579	ENSRNOG00000018131	-0.9781364073271449	1.3416889947803767e-4
961	ENSRNOG00000065376	ENSRNOG00000031855	-0.9781146184322205	1.3450184383412278e-4
962	ENSRNOG00000065998	ENSRNOG00000014008	-0.9781107384645356	1.3456118313603938e-4
963	ENSRNOG00000063579	ENSRNOG00000042960	-0.97810986109025	1.3457460365251528e-4
964	ENSRNOG00000070376	ENSRNOG00000038331	-0.9781064360408405	1.346270016249207e-4
965	ENSRNOG00000063579	ENSRNOG00000019982	-0.9780932651030421	1.3482860996383295e-4
966	MSTRG.2148	ENSRNOG00000007369	-0.9780926451578835	1.348381039338875e-4
967	ENSRNOG00000063634	ENSRNOG00000048250	-0.9780924520223709	1.348410617332263e-4
968	ENSRNOG00000063634	ENSRNOG00000013981	-0.978089714126864	1.3488299575481477e-4
969	ENSRNOG00000066884	ENSRNOG00000053675	-0.9780840259527545	1.3497014154251197e-4
970	ENSRNOG00000065163	ENSRNOG00000007748	-0.9780838822260118	1.349723439456607e-4
971	ENSRNOG00000064568	ENSRNOG00000064007	-0.9780719944046533	1.3515458168589234e-4
972	ENSRNOG00000067835	ENSRNOG00000020167	-0.9780392903616751	1.3565668419590615e-4
973	ENSRNOG00000063209	ENSRNOG00000047697	-0.9780119949368197	1.3607659870773503e-4
974	MSTRG.7821	ENSRNOG00000061038	-0.9779788463927129	1.3658759867363202e-4
975	ENSRNOG00000067835	ENSRNOG00000002722	-0.9779754875888489	1.366394398907289e-4
976	ENSRNOG00000071003	ENSRNOG00000007369	-0.9779648108705057	1.3680430683060685e-4
977	ENSRNOG00000063579	ENSRNOG00000023657	-0.9779367901591829	1.3723755875338917e-4
978	ENSRNOG00000066622	ENSRNOG00000013463	-0.9779184712022014	1.375212452305874e-4
979	ENSRNOG00000066873	ENSRNOG00000014610	-0.977913708885211	1.375950514401758e-4
980	ENSRNOG00000063993	ENSRNOG00000019147	-0.9779116028124898	1.3762769880476533e-4
981	ENSRNOG00000063209	ENSRNOG00000027916	-0.9779012337740801	1.3778850217316396e-4
982	ENSRNOG00000067835	ENSRNOG00000011425	-0.9778962014070701	1.3786658462588974e-4
983	ENSRNOG00000067921	ENSRNOG00000021323	-0.9778886776052245	1.379833734926894e-4
984	ENSRNOG00000065163	ENSRNOG00000013397	-0.977875873530058	1.3818226140838163e-4
985	ENSRNOG00000063209	ENSRNOG00000006839	-0.9778734240792433	1.3822032861288136e-4
986	ENSRNOG00000065786	ENSRNOG00000029212	-0.977865071330423	1.3835018667318622e-4
987	MSTRG.4435	ENSRNOG00000007508	-0.9778649753470408	1.3835167932496617e-4
988	ENSRNOG00000066884	ENSRNOG00000007713	-0.9778559691557711	1.3849177864555529e-4
989	ENSRNOG00000067921	ENSRNOG00000057347	-0.9778532670039235	1.3853382950879123e-4
990	ENSRNOG00000067835	ENSRNOG00000008565	-0.9778376930414673	1.387763397260322e-4
991	ENSRNOG00000067921	ENSRNOG00000031789	-0.9778369318639325	1.387881988961226e-4
992	ENSRNOG00000066075	ENSRNOG00000049215	-0.97781377411931	1.3914928611113986e-4
993	ENSRNOG00000063348	ENSRNOG00000003869	-0.9778127876207263	1.391646805153357e-4
994	ENSRNOG00000063348	ENSRNOG00000058329	-0.9777885648881289	1.395429971204898e-4
995	ENSRNOG00000063348	ENSRNOG00000050585	-0.9777610676086967	1.39973198606258e-4
996	ENSRNOG00000067151	ENSRNOG00000027350	-0.9777307591353882	1.4044829676196358e-4
997	ENSRNOG00000003984	ENSRNOG00000049215	-0.9777148994742975	1.4069728621635136e-4
998	ENSRNOG00000063348	ENSRNOG00000026036	-0.9777143411681348	1.407060561593454e-4
999	ENSRNOG00000064568	ENSRNOG00000065021	-0.9777128191554431	0.00014072996577985109
1000	ENSRNOG00000064499	ENSRNOG00000020013	-0.9777016792050713	1.4090503936081689e-4
1001	ENSRNOG00000069674	ENSRNOG00000005573	-0.9777010757281858	1.4091452720688125e-4
1002	ENSRNOG00000063348	ENSRNOG00000019217	-0.9776776779096731	1.41282680686583e-4
1003	ENSRNOG00000069144	ENSRNOG00000067479	-0.9776492700173793	1.4173043514675854e-4
1004	ENSRNOG00000065998	ENSRNOG00000022635	-0.9776475423522121	1.4175769319813014e-4
1005	ENSRNOG00000066622	ENSRNOG00000011284	-0.9776403812462874	1.4187071009530428e-4
1006	MSTRG.15404	ENSRNOG00000052510	-0.9776387830691803	1.4189593992686156e-4
1007	ENSRNOG00000065998	ENSRNOG00000069840	-0.9776368224763562	1.4192689473446762e-4
1008	ENSRNOG00000063348	ENSRNOG00000007512	-0.9776030765703377	1.4246032274978226e-4
1009	MSTRG.1333	ENSRNOG00000013238	-0.9776030048062195	1.4246145841001479e-4
1010	ENSRNOG00000069674	ENSRNOG00000016544	-0.9775989206380664	1.425260988787702e-4
1011	ENSRNOG00000067105	ENSRNOG00000030291	-0.977596900373209	1.425580802401072e-4
1012	ENSRNOG00000070022	ENSRNOG00000055934	-0.9775912572631128	1.4264743492242715e-4
1013	MSTRG.9597	ENSRNOG00000050207	-0.9775907028020755	1.4265621622411295e-4
1014	ENSRNOG00000065163	ENSRNOG00000001259	-0.9775864695510698	1.4272327114861483e-4
1015	ENSRNOG00000063209	ENSRNOG00000068266	-0.9775761475441733	1.4288685104002496e-4
1016	ENSRNOG00000069161	ENSRNOG00000036631	-0.9775755622158182	1.428961304847931e-4
1017	MSTRG.2148	ENSRNOG00000001436	-0.977566994603437	1.43031997384524e-4
1018	ENSRNOG00000066031	ENSRNOG00000002722	-0.977566492212945	1.4303996678188824e-4
1019	ENSRNOG00000062871	ENSRNOG00000025991	-0.9775458186844297	1.4336813958637507e-4
1020	ENSRNOG00000063209	ENSRNOG00000019147	-0.9775438090276415	1.4340006490520807e-4
1021	ENSRNOG00000067835	ENSRNOG00000069278	-0.9775412743778255	1.4344033628166386e-4
1022	ENSRNOG00000066075	ENSRNOG00000024178	-0.9775391806541545	1.434736071579401e-4
1023	ENSRNOG00000070797	ENSRNOG00000025151	-0.9775367747625836	1.435118443011696e-4
1024	ENSRNOG00000070152	ENSRNOG00000055042	-0.977535544813752	1.43531394381613e-4
1025	ENSRNOG00000067105	ENSRNOG00000018812	-0.9775177877812284	1.4381381996009246e-4
1026	ENSRNOG00000067835	ENSRNOG00000004608	-0.9775137504926179	1.438780792080152e-4
1027	ENSRNOG00000064568	ENSRNOG00000024602	-0.9775075105890859	1.4397742989880058e-4
1028	ENSRNOG00000069161	ENSRNOG00000018938	-0.9775029685688387	1.440497728870671e-4
1029	ENSRNOG00000063634	ENSRNOG00000010517	-0.9774870377877557	1.4430368151430173e-4
1030	ENSRNOG00000068968	ENSRNOG00000018311	-0.9774801420339976	1.4441367036344133e-4
1031	ENSRNOG00000065346	ENSRNOG00000006388	-0.9774662762306926	1.4463498431815935e-4
1032	ENSRNOG00000065346	ENSRNOG00000012156	-0.9774444458031909	1.4498383218208843e-4
1033	ENSRNOG00000063634	ENSRNOG00000014997	-0.9774407406901239	1.4504308921514664e-4
1034	ENSRNOG00000065346	ENSRNOG00000039865	-0.9774401038598551	1.4505327569480642e-4
1035	ENSRNOG00000064568	ENSRNOG00000068425	-0.9774323867146397	1.4517674992275964e-4
1036	ENSRNOG00000065346	ENSRNOG00000010958	-0.9774187603991831	1.4539492372778184e-4
1037	MSTRG.9597	ENSRNOG00000010555	-0.9774129391470612	1.454881885596393e-4
1038	ENSRNOG00000065163	ENSRNOG00000005348	-0.9774098922783988	1.4553701799080443e-4
1039	ENSRNOG00000066075	ENSRNOG00000029450	-0.9773970208728775	1.457434042513306e-4
1040	ENSRNOG00000063209	ENSRNOG00000000219	-0.9773895283194376	1.458636237114952e-4
1041	ENSRNOG00000019857	ENSRNOG00000004703	-0.977373935124581	1.4611400897779347e-4
1042	ENSRNOG00000065163	ENSRNOG00000021274	-0.9773653362594013	1.4625219340613782e-4
1043	ENSRNOG00000063348	ENSRNOG00000000610	-0.977336110783988	1.4672243118951656e-4
1044	ENSRNOG00000063634	ENSRNOG00000060410	-0.977327741599648	1.4685725707641595e-4
1045	ENSRNOG00000066873	ENSRNOG00000061099	-0.9773257733277837	1.4688897626413677e-4
1046	ENSRNOG00000065346	ENSRNOG00000019433	-0.9773159758499379	1.4704692579048384e-4
1047	ENSRNOG00000065163	ENSRNOG00000005515	-0.9773069524357871	1.471924858018614e-4
1048	ENSRNOG00000063579	ENSRNOG00000017406	-0.977286866329781	1.4751681042390885e-4
1049	ENSRNOG00000063634	ENSRNOG00000042309	-0.977268952756538	1.4780641477685208e-4
1050	MSTRG.12581	ENSRNOG00000017243	-0.9772652022645815	1.4786709092495798e-4
1051	MSTRG.4435	ENSRNOG00000019435	-0.9772592994380617	1.4796261800320565e-4
1052	ENSRNOG00000062871	ENSRNOG00000056325	-0.9772531167445404	1.4806271367673318e-4
1053	ENSRNOG00000065346	ENSRNOG00000005101	-0.9772494670959178	1.4812181916612488e-4
1054	ENSRNOG00000067743	ENSRNOG00000022911	-0.9772365445530168	1.483312107690704e-4
1055	MSTRG.9891	ENSRNOG00000032729	-0.9772275887644271	1.484764301480368e-4
1056	ENSRNOG00000065346	ENSRNOG00000011039	-0.9772044287836666	1.4885236530881585e-4
1057	ENSRNOG00000067151	ENSRNOG00000027916	-0.9771961398401477	1.4898704998334011e-4
1058	ENSRNOG00000069426	ENSRNOG00000037080	-0.9771738859032892	1.493490070214598e-4
1059	ENSRNOG00000066075	ENSRNOG00000031726	-0.9771584284888187	1.4960072774750088e-4
1060	ENSRNOG00000065998	ENSRNOG00000040242	-0.9771383936145555	1.4992736746854973e-4
1061	ENSRNOG00000066622	ENSRNOG00000071023	-0.9771363142079634	1.499612935167427e-4
1062	ENSRNOG00000067835	ENSRNOG00000021866	-0.9771282271025933	1.5009328019877088e-4
1063	ENSRNOG00000069051	ENSRNOG00000008026	-0.9771243727898583	1.5015620937663954e-4
1064	ENSRNOG00000061154	ENSRNOG00000033076	-0.9771150253637316	1.503088896543936e-4
1065	ENSRNOG00000067235	ENSRNOG00000010362	-0.9771058157922258	1.5045940867675078e-4
1066	ENSRNOG00000065346	ENSRNOG00000047647	-0.9771034676551639	1.504978004303048e-4
1067	ENSRNOG00000063209	ENSRNOG00000015020	-0.9770910532857331	1.5070087087787343e-4
1068	ENSRNOG00000064568	ENSRNOG00000009815	-0.977087871794513	1.5075293900812525e-4
1069	ENSRNOG00000065376	ENSRNOG00000010362	-0.9770778953313035	1.5091628283814273e-4
1070	ENSRNOG00000070022	ENSRNOG00000002289	-0.9770426261090034	1.5149458836805074e-4
1071	ENSRNOG00000065376	ENSRNOG00000051624	-0.9770199167021807	1.5186764984065348e-4
1072	ENSRNOG00000066075	ENSRNOG00000066139	-0.9770122908181943	1.5199304761814858e-4
1073	ENSRNOG00000063209	ENSRNOG00000020776	-0.9770052226702788	1.521093292344844e-4
1074	ENSRNOG00000064826	ENSRNOG00000020202	-0.9769829430667888	1.5247620895419978e-4
1075	ENSRNOG00000067921	ENSRNOG00000049911	-0.9769772391140498	1.5257022102499462e-4
1076	ENSRNOG00000068246	ENSRNOG00000048187	-0.9769730839708547	1.526387274899399e-4
1077	ENSRNOG00000068224	ENSRNOG00000005573	-0.9769588091919748	1.5287421755383335e-4
1078	ENSRNOG00000065163	ENSRNOG00000026979	-0.9769497783235522	1.530233109292567e-4
1079	ENSRNOG00000063513	ENSRNOG00000009963	-0.9769482937225434	1.5304782895286806e-4
1080	ENSRNOG00000067835	ENSRNOG00000058249	-0.9769432522595723	1.5313110563619503e-4
1081	ENSRNOG00000063579	ENSRNOG00000034075	-0.9769319624309359	1.5331769298576603e-4
1082	ENSRNOG00000065346	ENSRNOG00000013463	-0.9769288881459214	1.533685252488315e-4
1083	ENSRNOG00000063209	ENSRNOG00000007304	-0.9768875007492983	1.5405382976663162e-4
1084	ENSRNOG00000065394	ENSRNOG00000037211	-0.9768870040224029	1.5406206577450732e-4
1085	MSTRG.2148	ENSRNOG00000005993	-0.9768797244399352	1.5418279539680668e-4
1086	ENSRNOG00000063513	ENSRNOG00000012324	-0.9768600869891267	1.545087575771653e-4
1087	ENSRNOG00000062871	ENSRNOG00000029844	-0.9768537729332939	1.5461365180469144e-4
1088	ENSRNOG00000064568	ENSRNOG00000020013	-0.9768428558329406	1.547951156481986e-4
1089	ENSRNOG00000066075	ENSRNOG00000006096	-0.976840151469652	1.5484008713007036e-4
1090	ENSRNOG00000063634	ENSRNOG00000000442	-0.976835755353574	1.5491320777427653e-4
1091	ENSRNOG00000063209	ENSRNOG00000020525	-0.9768302120532321	1.5500543887458917e-4
1092	ENSRNOG00000068224	ENSRNOG00000011305	-0.9767989882415644	1.5552556131548378e-4
1093	ENSRNOG00000065697	ENSRNOG00000018580	-0.9767925223304385	1.5563339946877974e-4
1094	ENSRNOG00000063348	ENSRNOG00000061129	-0.9767880908409472	1.5570733336423004e-4
1095	MSTRG.9891	ENSRNOG00000018059	-0.9767604354103001	1.561692027411965e-4
1096	ENSRNOG00000065346	ENSRNOG00000022455	-0.9767581678528844	1.562071090586148e-4
1097	ENSRNOG00000066884	ENSRNOG00000062806	-0.9767568813131114	1.5622861833231028e-4
1098	ENSRNOG00000069426	ENSRNOG00000013306	-0.9767347438990538	1.565990036374032e-4
1099	ENSRNOG00000066622	ENSRNOG00000049349	-0.9767309294333892	1.5666287698645753e-4
1100	ENSRNOG00000063209	ENSRNOG00000014508	-0.9767002442604558	1.5717726599207005e-4
1101	ENSRNOG00000067835	ENSRNOG00000009085	-0.9766974589734002	1.5722400673068293e-4
1102	ENSRNOG00000066622	ENSRNOG00000029339	-0.9766952116529334	1.5726172572705366e-4
1103	ENSRNOG00000067105	ENSRNOG00000056651	-0.9766911932868529	1.5732918337030277e-4
1104	ENSRNOG00000063209	ENSRNOG00000006950	-0.9766899298903965	1.573503959875211e-4
1105	ENSRNOG00000066622	ENSRNOG00000011039	-0.9766896133200218	1.5735571151909156e-4
1106	ENSRNOG00000066622	ENSRNOG00000030245	-0.9766872787431533	1.573949146909115e-4
1107	ENSRNOG00000065394	ENSRNOG00000010320	-0.9766735658387596	1.576253049013765e-4
1108	ENSRNOG00000063179	ENSRNOG00000007243	-0.9766645650585767	1.5777663599281233e-4
1109	ENSRNOG00000066622	ENSRNOG00000017434	-0.9766543421925168	1.5794861911788693e-4
1110	ENSRNOG00000003984	ENSRNOG00000036830	-0.9766402056222554	1.5818662794320204e-4
1111	ENSRNOG00000065786	ENSRNOG00000030449	-0.9766386198453685	1.5821334002596998e-4
1112	MSTRG.9891	ENSRNOG00000014163	-0.9766082188826155	1.5872595772581377e-4
1113	ENSRNOG00000068224	ENSRNOG00000024178	-0.9766036769234504	1.5880262859857552e-4
1114	ENSRNOG00000064337	ENSRNOG00000052294	-0.9765976204139317	1.5890490027814508e-4
1115	ENSRNOG00000067235	ENSRNOG00000047746	-0.9765962712626094	1.5892768771630372e-4
1116	ENSRNOG00000067835	ENSRNOG00000008424	-0.9765801803006589	1.591996174301613e-4
1117	ENSRNOG00000067151	ENSRNOG00000020105	-0.9765681470710192	1.5940315444074038e-4
1118	MSTRG.15606	ENSRNOG00000028622	-0.9765634454762885	1.5948272204147074e-4
1119	ENSRNOG00000066031	ENSRNOG00000032788	-0.9765553817769456	1.5961924343121936e-4
1120	ENSRNOG00000065346	ENSRNOG00000011826	-0.976550280574634	1.5970564460832115e-4
1121	MSTRG.9891	ENSRNOG00000005472	-0.9765484695082802	1.597363260916751e-4
1122	ENSRNOG00000051306	ENSRNOG00000017511	-0.9765402598081154	1.5987545161300076e-4
1123	ENSRNOG00000069426	ENSRNOG00000011000	-0.9765301661996264	1.6004660167912022e-4
1124	ENSRNOG00000069674	ENSRNOG00000028344	-0.9765252778100948	1.6012952981170336e-4
1125	ENSRNOG00000067151	ENSRNOG00000014765	-0.9765244217475825	1.6014405495168305e-4
1126	ENSRNOG00000063634	ENSRNOG00000005130	-0.9765232496741573	1.6016394324269712e-4
1127	ENSRNOG00000065998	ENSRNOG00000015717	-0.9765152018584015	1.603005420998116e-4
1128	ENSRNOG00000065163	ENSRNOG00000003765	-0.976501731011054	1.6052934358867788e-4
1129	ENSRNOG00000070022	ENSRNOG00000005615	-0.9764936545810088	1.606666144973179e-4
1130	ENSRNOG00000067743	ENSRNOG00000036670	-0.9764928535580448	1.606802328819601e-4
1131	ENSRNOG00000067743	ENSRNOG00000026080	-0.9764884892038699	1.6075444440355469e-4
1132	ENSRNOG00000071185	ENSRNOG00000007237	-0.9764748228593334	1.6098695915633954e-4
1133	ENSRNOG00000070022	ENSRNOG00000011200	-0.9764575918316549	1.6128040773910612e-4
1134	ENSRNOG00000065163	ENSRNOG00000015829	-0.976449701537916	1.61414887665412e-4
1135	ENSRNOG00000065163	ENSRNOG00000042533	-0.9764286360120981	1.6177424975483135e-4
1136	ENSRNOG00000063579	ENSRNOG00000008226	-0.976416768265207	1.6197691437058737e-4
1137	ENSRNOG00000063209	ENSRNOG00000003150	-0.976406564314747	1.6215128735774798e-4
1138	MSTRG.7821	ENSRNOG00000011332	-0.9763923716416861	1.6239400863060638e-4
1139	ENSRNOG00000068224	ENSRNOG00000067308	-0.9763874642859586	1.6247798393465018e-4
1140	ENSRNOG00000064499	ENSRNOG00000069312	-0.976380624303151	1.625950737613735e-4
1141	ENSRNOG00000067921	ENSRNOG00000021866	-0.9763516985876767	1.630907926815084e-4
1142	ENSRNOG00000069161	ENSRNOG00000014712	-0.9763514982868488	1.630942285031356e-4
1143	ENSRNOG00000069161	ENSRNOG00000060356	-0.9763488743111199	1.6313924234734323e-4
1144	ENSRNOG00000069674	ENSRNOG00000007490	-0.9763313663355855	1.6343977808386256e-4
1145	MSTRG.15404	ENSRNOG00000063584	-0.976327443245191	1.6350716567581358e-4
1146	ENSRNOG00000067835	ENSRNOG00000010064	-0.9763206329716169	1.636241862144061e-4
1147	ENSRNOG00000066622	ENSRNOG00000009528	-0.9763109102208778	1.637913381364875e-4
1148	MSTRG.2148	ENSRNOG00000006778	-0.976309667909215	1.6381270308052365e-4
1149	ENSRNOG00000067835	ENSRNOG00000021524	-0.9763018184261033	1.6394773478589642e-4
1150	ENSRNOG00000065376	ENSRNOG00000062927	-0.9763006834580199	1.6396726470091494e-4
1151	ENSRNOG00000063209	ENSRNOG00000064293	-0.9762994779191339	1.639880104782332e-4
1152	ENSRNOG00000064568	ENSRNOG00000031287	-0.9762962417342154	1.640437088026303e-4
1153	ENSRNOG00000070022	ENSRNOG00000050223	-0.9762946329579264	1.640714018171785e-4
1154	ENSRNOG00000063209	ENSRNOG00000059092	-0.9762934681825657	1.6409145366513833e-4
1155	ENSRNOG00000065163	ENSRNOG00000009308	-0.9762816660809195	1.6429471163714737e-4
1156	ENSRNOG00000067408	ENSRNOG00000010208	-0.9762712902157188	1.6447353056014968e-4
1157	ENSRNOG00000063348	ENSRNOG00000021125	-0.9762666830318107	1.645529684890512e-4
1158	ENSRNOG00000063209	ENSRNOG00000019949	-0.9762553440731115	1.6474857429682466e-4
1159	ENSRNOG00000064337	ENSRNOG00000013399	-0.9762479260271437	1.6487661625630423e-4
1160	ENSRNOG00000064826	ENSRNOG00000030291	-0.9762472450827682	1.648883729217232e-4
1161	ENSRNOG00000062687	ENSRNOG00000007369	-0.9762377462492919	1.6505242461151148e-4
1162	ENSRNOG00000067105	ENSRNOG00000062927	-0.9762335603897963	1.6512474827479195e-4
1163	ENSRNOG00000063179	ENSRNOG00000015945	-0.9762283085841762	1.652155161566693e-4
1164	ENSRNOG00000062838	ENSRNOG00000051816	-0.9762242774251533	1.6528520755132448e-4
1165	ENSRNOG00000064438	ENSRNOG00000009311	-0.976187131653498	1.6592821465155616e-4
1166	ENSRNOG00000066622	ENSRNOG00000002196	-0.9761862035076271	1.6594430025285156e-4
1167	ENSRNOG00000064568	ENSRNOG00000011305	-0.9761843648082935	1.659761693066919e-4
1168	ENSRNOG00000070022	ENSRNOG00000008236	-0.9761799274572995	1.6605309422357273e-4
1169	ENSRNOG00000063209	ENSRNOG00000003858	-0.9761786108020605	1.660759235480036e-4
1170	MSTRG.2148	ENSRNOG00000006575	-0.9761698660168537	1.6622759576723212e-4
1171	ENSRNOG00000066622	ENSRNOG00000006709	-0.9761535193061212	1.6651133936784746e-4
1172	ENSRNOG00000067235	ENSRNOG00000021484	-0.9761370504385778	1.6679749497172658e-4
1173	MSTRG.9891	ENSRNOG00000006096	-0.9761361240997216	1.6681359931425277e-4
1174	ENSRNOG00000069611	ENSRNOG00000029749	-0.9761270092923938	1.6697210907246074e-4
1175	ENSRNOG00000063634	ENSRNOG00000006400	-0.9761269226239143	1.6697361669892885e-4
1176	ENSRNOG00000063209	ENSRNOG00000006778	-0.9761253871463901	0.00016700032817418275
1177	MSTRG.2148	ENSRNOG00000010549	-0.9761250060944134	1.6700695742533078e-4
1178	ENSRNOG00000066075	ENSRNOG00000016696	-0.9761147383278518	1.6718564721673879e-4
1179	ENSRNOG00000066884	ENSRNOG00000057996	-0.9761137552493042	1.6720276169079895e-4
1180	ENSRNOG00000069161	ENSRNOG00000021800	-0.9761123887288174	1.672265532630668e-4
1181	ENSRNOG00000063348	ENSRNOG00000032922	-0.9761083021449801	1.672977140694254e-4
1182	ENSRNOG00000063209	ENSRNOG00000002425	-0.9760985646270595	1.6746734884831582e-4
1183	MSTRG.4435	ENSRNOG00000017546	-0.9760964911772048	1.6750348311012075e-4
1184	ENSRNOG00000067595	ENSRNOG00000012151	-0.976095759540132	1.6751623454647202e-4
1185	ENSRNOG00000062871	ENSRNOG00000009528	-0.9760903793834375	1.6761002110565748e-4
1186	MSTRG.2148	ENSRNOG00000021866	-0.9760647090906458	1.6805793476493136e-4
1187	ENSRNOG00000064499	ENSRNOG00000025251	-0.9760574482325736	1.681847566536998e-4
1188	MSTRG.2148	ENSRNOG00000011302	-0.9760526667577538	1.6826830348604105e-4
1189	ENSRNOG00000003984	ENSRNOG00000003134	-0.9760348272540962	1.6858023180033044e-4
1190	ENSRNOG00000066622	ENSRNOG00000019217	-0.9760282995160533	1.6869445700651298e-4
1191	ENSRNOG00000069051	ENSRNOG00000062467	-0.9760266324631798	1.6872363521391875e-4
1192	ENSRNOG00000070797	ENSRNOG00000003134	-0.9760025021621584	1.6914632149922504e-4
1193	MSTRG.9891	ENSRNOG00000066660	-0.97600207019053975	1.691538940122861e-4
1194	ENSRNOG00000069674	ENSRNOG00000010607	-0.9759993613667534	1.6920138461617995e-4
1195	ENSRNOG00000070155	ENSRNOG00000059500	-0.9759898739986856	1.6936777804943404e-4
1196	MSTRG.16924	ENSRNOG00000020532	-0.9759693852135585	1.6972745144672174e-4
1197	ENSRNOG00000063348	ENSRNOG00000069743	-0.975968384649488	1.6974502763900112e-4
1198	ENSRNOG00000071185	ENSRNOG00000050834	-0.9759618314779538	1.6986016931852532e-4
1199	ENSRNOG00000067921	ENSRNOG00000012269	-0.9759584894842489	1.6991890731188342e-4
1200	ENSRNOG00000065998	ENSRNOG00000001111	-0.9759495301212399	1.700764343972594e-4
1201	ENSRNOG00000065998	ENSRNOG00000016544	-0.975941468801698	1.7021824606056057e-4
1202	ENSRNOG00000063209	ENSRNOG00000010882	-0.9759379905805596	1.702794553501974e-4
1203	ENSRNOG00000065346	ENSRNOG00000015857	-0.9759312163562331	1.7039870491797338e-4
1204	MSTRG.12581	ENSRNOG00000019283	-0.9759166606726934	1.7065510311353727e-4
1205	ENSRNOG00000065163	ENSRNOG00000053675	-0.9758903394451823	1.7111933455682404e-4
1206	ENSRNOG00000064499	ENSRNOG00000008026	-0.9758892326659668	1.7113887145092654e-4
1207	ENSRNOG00000003984	ENSRNOG00000020687	-0.975879690230304	1.7130736988324458e-4
1208	ENSRNOG00000062838	ENSRNOG00000010161	-0.975855914563387	1.7172762567829736e-4
1209	MSTRG.2148	ENSRNOG00000021812	-0.9758551339890228	1.717414334179157e-4
1210	ENSRNOG00000065346	ENSRNOG00000045686	-0.9758541284189158	1.7175922212819827e-4
1211	ENSRNOG00000067835	ENSRNOG00000065000	-0.9758484723427554	1.7185929955143564e-4
1212	ENSRNOG00000070376	ENSRNOG00000009311	-0.9758381049775114	1.720428277134367e-4
1213	ENSRNOG00000065998	ENSRNOG00000000373	-0.9758303374009463	1.721804096277424e-4
1214	ENSRNOG00000070022	ENSRNOG00000011302	-0.9758235778395828	1.72300190563357e-4
1215	ENSRNOG00000065998	ENSRNOG00000019741	-0.9758167431827234	1.724213526685947e-4
1216	MSTRG.16924	ENSRNOG00000002487	-0.9758124805868508	1.7249694398291382e-4
1217	ENSRNOG00000063348	ENSRNOG00000014025	-0.9758052219582206	1.7262571127441007e-4
1218	ENSRNOG00000062838	ENSRNOG00000020873	-0.9758015818106495	1.7269030865474377e-4
1219	ENSRNOG00000069611	ENSRNOG00000071034	-0.9757909682324277	1.7287873743665472e-4
1220	ENSRNOG00000070022	ENSRNOG00000013747	-0.9757886432591326	1.7292003033286818e-4
1221	ENSRNOG00000062871	ENSRNOG00000013659	-0.9757861472405243	1.7296436763469814e-4
1222	ENSRNOG00000070022	ENSRNOG00000070622	-0.975784180972345	1.7299929963687788e-4
1223	ENSRNOG00000069426	ENSRNOG00000050360	-0.9757822371167534	1.7303383759670332e-4
1224	ENSRNOG00000067105	ENSRNOG00000029339	-0.9757704618254848	1.7324314595867918e-4
1225	ENSRNOG00000070376	ENSRNOG00000024839	-0.9757485421282225	1.736331749082609e-4
1226	ENSRNOG00000069674	ENSRNOG00000020058	-0.9757359238334116	1.738579360268666e-4
1227	ENSRNOG00000063579	ENSRNOG00000019466	-0.9757350202900145	1.7387403687796343e-4
1228	ENSRNOG00000063579	ENSRNOG00000010626	-0.9757301771256456	1.7396035564343215e-4
1229	ENSRNOG00000062871	ENSRNOG00000005101	-0.9757272652250256	1.7401226616131638e-4
1230	ENSRNOG00000062838	ENSRNOG00000016769	-0.9757187703737997	1.741637567920229e-4
1231	MSTRG.2148	ENSRNOG00000017977	-0.9757131259705567	1.742644581606001e-4
1232	ENSRNOG00000067743	ENSRNOG00000053942	-0.9756924362147686	1.7463387908911443e-4
1233	ENSRNOG00000065697	ENSRNOG00000053769	-0.9756898604581186	1.7467990251374133e-4
1234	ENSRNOG00000062871	ENSRNOG00000052157	-0.9756896211805464	1.7468417827393168e-4
1235	ENSRNOG00000065697	ENSRNOG00000047663	-0.9756815015499023	1.7482930862322554e-4
1236	ENSRNOG00000067151	ENSRNOG00000049045	-0.9756620067281901	1.7517805243616458e-4
1237	ENSRNOG00000067835	ENSRNOG00000013932	-0.9756583408386736	1.7524367796339924e-4
1238	MSTRG.15404	ENSRNOG00000052017	-0.9756563041547697	1.752801443246632e-4
1239	MSTRG.15606	ENSRNOG00000001259	-0.9756538049590711	1.7532489803118168e-4
1240	ENSRNOG00000065346	ENSRNOG00000020202	-0.9756512991240105	1.7536977746424043e-4
1241	ENSRNOG00000064438	ENSRNOG00000053875	-0.9756499181063983	1.753945143743163e-4
1242	ENSRNOG00000071185	ENSRNOG00000022844	-0.9756443883322221	1.754935850057926e-4
1243	ENSRNOG00000065394	ENSRNOG00000014006	-0.9756420564826783	1.7553537207426473e-4
1244	ENSRNOG00000067835	ENSRNOG00000021125	-0.9756405674361651	1.755620590957463e-4
1245	MSTRG.2148	ENSRNOG00000018748	-0.9756180433670428	1.759660352849135e-4
1246	ENSRNOG00000063579	ENSRNOG00000048114	-0.9756070671100817	1.7616309835188915e-4
1247	ENSRNOG00000067835	ENSRNOG00000020317	-0.9756056688353344	1.7618821182052713e-4
1248	ENSRNOG00000070155	ENSRNOG00000021116	-0.9755848909439747	1.765616408295756e-4
1249	ENSRNOG00000066622	ENSRNOG00000069578	-0.9755845835636641	1.76567168733488e-4
1250	ENSRNOG00000063579	ENSRNOG00000015375	-0.9755795442283622	1.766578104565042e-4
1251	ENSRNOG00000063579	ENSRNOG00000058329	-0.9755642413948326	1.7693322996414906e-4
1252	ENSRNOG00000064438	ENSRNOG00000017716	-0.9755605732438766	1.7699928711212287e-4
1253	ENSRNOG00000066884	ENSRNOG00000063400	-0.9755514681592772	1.7716331765704751e-4
1254	ENSRNOG00000067235	ENSRNOG00000018279	-0.975543777098872	1.7730194470266802e-4
1255	ENSRNOG00000068224	ENSRNOG00000021400	-0.9755373693734732	1.7741748968491677e-4
1256	ENSRNOG00000067701	ENSRNOG00000069483	-0.9755277671014404	1.7759072312584223e-4
1257	ENSRNOG00000063348	ENSRNOG00000055314	-0.9755232821060164	1.7767167090076974e-4
1258	ENSRNOG00000063348	ENSRNOG00000015082	-0.975512589205029	1.7786475118120038e-4
1259	ENSRNOG00000066622	ENSRNOG00000059947	-0.9755099691554119	1.779120801228551e-4
1260	MSTRG.2148	ENSRNOG00000064293	-0.9755062625508577	1.7797904955729749e-4
1261	ENSRNOG00000066622	ENSRNOG00000069743	-0.9754995462198925	1.7810043576682588e-4
1262	ENSRNOG00000065163	ENSRNOG00000063049	-0.9754747958732232	1.7854818167650777e-4
1263	ENSRNOG00000064826	ENSRNOG00000014453	-0.9754720248028247	1.785983533912905e-4
1264	ENSRNOG00000066884	ENSRNOG00000016835	-0.9754468013155004	1.7905542430418642e-4
1265	ENSRNOG00000067151	ENSRNOG00000064803	-0.9754446108774184	1.7909514973890595e-4
1266	ENSRNOG00000066622	ENSRNOG00000039865	-0.9754148844036049	1.7963478345839334e-4
1267	ENSRNOG00000064337	ENSRNOG00000039305	-0.9753982433047211	1.7993729672038938e-4
1268	MSTRG.2148	ENSRNOG00000003150	-0.9753959581860495	1.7997886084764048e-4
1269	MSTRG.17027	ENSRNOG00000054460	-0.9753685871270275	1.8047715883828808e-4
1270	ENSRNOG00000065346	ENSRNOG00000021125	-0.9753635568620174	1.8056882554073894e-4
1271	ENSRNOG00000068224	ENSRNOG00000004874	-0.9753577596457094	1.8067450281744613e-4
1272	MSTRG.4435	ENSRNOG00000021800	-0.9753508244987762	1.808009717840786e-4
1273	MSTRG.5149	ENSRNOG00000042607	-0.9753503751372519	1.808091681350099e-4
1274	ENSRNOG00000063348	ENSRNOG00000059445	-0.9753314053772659	1.8115537834373363e-4
1275	ENSRNOG00000066622	ENSRNOG00000018384	-0.9753310731825555	1.811614446238785e-4
1276	ENSRNOG00000065346	ENSRNOG00000007304	-0.9753269670687267	1.8123643725731498e-4
1277	MSTRG.5149	ENSRNOG00000065735	-0.9753249799036157	1.8127273678825162e-4
1278	MSTRG.14772	ENSRNOG00000042041	-0.9753088668790322	1.8156723322437784e-4
1279	MSTRG.9891	ENSRNOG00000009219	-0.9753052896402343	1.816326527572798e-4
1280	MSTRG.2148	ENSRNOG00000011011	-0.9752970955428104	1.8178255700673773e-4
1281	ENSRNOG00000066818	ENSRNOG00000017945	-0.9752923557947218	1.8186930041697025e-4
1282	ENSRNOG00000067047	ENSRNOG00000048152	-0.9752799993068256	1.820955557514381e-4
1283	MSTRG.14772	ENSRNOG00000018615	-0.9752698929907054	1.8228073355897045e-4
1284	MSTRG.9891	ENSRNOG00000019751	-0.9752576214828953	1.825057348607828e-4
1285	MSTRG.4435	ENSRNOG00000009219	-0.975256004316155	1.8253539836599053e-4
1286	ENSRNOG00000065163	ENSRNOG00000016046	-0.9752476742474714	1.8268824136224993e-4
1287	ENSRNOG00000070022	ENSRNOG00000003967	-0.9752464257595757	1.8271115561896423e-4
1288	ENSRNOG00000067835	ENSRNOG00000029339	-0.97524422833226	1.8275149049484796e-4
1289	ENSRNOG00000065786	ENSRNOG00000020532	-0.9752325854237746	1.8296529039552034e-4
1290	ENSRNOG00000067921	ENSRNOG00000008970	-0.9752249932885104	1.8310478575234157e-4
1291	ENSRNOG00000068332	ENSRNOG00000015055	-0.9752227850350607	1.8314537135233344e-4
1292	ENSRNOG00000067151	ENSRNOG00000006839	-0.9752118002060169	1.83347341695006e-4
1293	ENSRNOG00000065346	ENSRNOG00000001706	-0.9752041917240455	1.8348731124806505e-4
1294	ENSRNOG00000063209	ENSRNOG00000056651	-0.9751967967733972	1.8362341354438705e-4
1295	ENSRNOG00000063179	ENSRNOG00000063400	-0.975187715610261	1.837906324198002e-4
1296	ENSRNOG00000068224	ENSRNOG00000009932	-0.9751743038450434	1.8403776005682104e-4
1297	ENSRNOG00000067921	ENSRNOG00000004063	-0.9751636119966339	1.8423491172048223e-4
1298	ENSRNOG00000065346	ENSRNOG00000047928	-0.9751417000231065	1.8463934912893443e-4
1299	ENSRNOG00000064438	ENSRNOG00000050794	-0.9751179082495371	1.85079081012951e-4
1300	ENSRNOG00000067743	ENSRNOG00000020907	-0.9751095571110183	1.8523357883104552e-4
1301	ENSRNOG00000064568	ENSRNOG00000015991	-0.9751062766361179	1.8529428931324254e-4
1302	ENSRNOG00000064826	ENSRNOG00000007369	-0.975104545319159	1.8532633490520034e-4
1303	ENSRNOG00000070022	ENSRNOG00000027350	-0.9750991648969887	1.8542594421688818e-4
1304	ENSRNOG00000067835	ENSRNOG00000018145	-0.9750865976701392	1.8565872913267611e-4
1305	ENSRNOG00000066622	ENSRNOG00000007582	-0.9750851929969842	1.856847589454258e-4
1306	ENSRNOG00000063348	ENSRNOG00000050578	-0.9750851664671282	1.856852505874862e-4
1307	ENSRNOG00000063348	ENSRNOG00000009296	-0.9750747424247193	1.8587848536744112e-4
1308	MSTRG.15606	ENSRNOG00000071034	-0.9750320025512543	1.8667202412325778e-4
1309	ENSRNOG00000070376	ENSRNOG00000021812	-0.9750229885858088	1.8683964094945438e-4
1310	ENSRNOG00000063579	ENSRNOG00000015020	-0.975020795556052	1.8688043441095203e-4
1311	ENSRNOG00000066622	ENSRNOG00000014765	-0.9750173181563471	1.869451298477376e-4
1312	ENSRNOG00000066884	ENSRNOG00000017206	-0.9750162534735746	1.8696494045267187e-4
1313	ENSRNOG00000062871	ENSRNOG00000008830	-0.9750100867796034	1.8707970902687165e-4
1314	ENSRNOG00000070022	ENSRNOG00000020315	-0.9749871918485403	1.875061744991413e-4
1315	ENSRNOG00000067835	ENSRNOG00000025823	-0.9749633797025044	1.87950338740972e-4
1316	ENSRNOG00000063348	ENSRNOG00000042419	-0.974942219821523	1.8834555604141379e-4
1317	ENSRNOG00000063579	ENSRNOG00000006735	-0.9749401796547706	1.883836877432099e-4
1318	ENSRNOG00000066622	ENSRNOG00000029844	-0.9749162878453462	1.8883057943597237e-4
1319	ENSRNOG00000070376	ENSRNOG00000065735	-0.974915582732562	1.888437780166452e-4
1320	ENSRNOG00000065346	ENSRNOG00000049425	-0.9749130957846399	1.8889033408076017e-4
1321	MSTRG.9891	ENSRNOG00000015461	-0.9749130335775065	1.8889149869583122e-4
1322	ENSRNOG00000061154	ENSRNOG00000001005	-0.9749049612345999	1.890426619088892e-4
1323	MSTRG.9891	ENSRNOG00000011659	-0.9748986699753842	1.8916052237605285e-4
1324	ENSRNOG00000062746	ENSRNOG00000001621	-0.9748974045170996	1.891842347603312e-4
1325	ENSRNOG00000067151	ENSRNOG00000068266	-0.9748880576587267	1.8935943270115274e-4
1326	ENSRNOG00000063209	ENSRNOG00000013851	-0.9748606914332127	1.8987294199201976e-4
1327	ENSRNOG00000070022	ENSRNOG00000009031	-0.97484759248558	1.9011902832311023e-4
1328	ENSRNOG00000066622	ENSRNOG00000048264	-0.9748449127323131	1.901693955039807e-4
1329	ENSRNOG00000066622	ENSRNOG00000047697	-0.974809798181113	1.9083012389464749e-4
1330	ENSRNOG00000062871	ENSRNOG00000009323	-0.9748054938853822	1.909112090368037e-4
1331	ENSRNOG00000062687	ENSRNOG00000020705	-0.9747994081145822	1.9102588895703043e-4
1332	ENSRNOG00000069674	ENSRNOG00000009079	-0.974795034992696	1.9110832114588305e-4
1333	ENSRNOG00000069426	ENSRNOG00000039560	-0.9747841905083785	1.9131282819806472e-4
1334	MSTRG.16924	ENSRNOG00000054474	-0.9747559292576078	1.9184639571268036e-4
1335	MSTRG.5534	ENSRNOG00000005608	-0.9747320347513592	1.92298210502706e-4
1336	ENSRNOG00000063579	ENSRNOG00000000610	-0.9747314523000437	1.9230923182145254e-4
1337	ENSRNOG00000065346	ENSRNOG00000001869	-0.9747304419917171	1.9232835007132465e-4
1338	MSTRG.2148	ENSRNOG00000049034	-0.9747296541865139	1.9234325863903834e-4
1339	ENSRNOG00000063634	ENSRNOG00000012324	-0.9747152696167837	1.9261559585581622e-4
1340	ENSRNOG00000066622	ENSRNOG00000025815	-0.9747058683239052	1.927937107359945e-4
1341	ENSRNOG00000069426	ENSRNOG00000005515	-0.9746991170938756	1.9292167858453446e-4
1342	ENSRNOG00000069541	ENSRNOG00000070263	-0.9746951526173286	1.9299684779761073e-4
1343	MSTRG.17017	ENSRNOG00000011994	-0.974680158020362	1.93281313451088e-4
1344	ENSRNOG00000069674	ENSRNOG00000015829	-0.9746795467727226	1.9329291485226108e-4
1345	ENSRNOG00000063993	ENSRNOG00000020546	-0.9746791886545779	1.9329971208081886e-4
1346	ENSRNOG00000063993	ENSRNOG00000007304	-0.9746734610491302	1.934084437185124e-4
1347	ENSRNOG00000065376	ENSRNOG00000021438	-0.9746710114837261	1.9345495686229341e-4
1348	MSTRG.4435	ENSRNOG00000009611	-0.9746646054659484	1.9357662789931673e-4
1349	ENSRNOG00000065346	ENSRNOG00000018748	-0.9746545608525902	1.93767499391706e-4
1350	ENSRNOG00000063579	ENSRNOG00000061238	-0.9746476265645645	1.9389933269287063e-4
1351	ENSRNOG00000065163	ENSRNOG00000014166	-0.9746439362332687	1.939695143082787e-4
1352	ENSRNOG00000063579	ENSRNOG00000019217	-0.9746438710393687	1.9397075428218002e-4
1353	MSTRG.5149	ENSRNOG00000042189	-0.9746350444704505	1.9413867732387402e-4
1354	ENSRNOG00000064568	ENSRNOG00000027869	-0.9746259238849009	1.943122848717671e-4
1355	ENSRNOG00000067743	ENSRNOG00000024178	-0.9746181884193206	1.944595995215792e-4
1356	MSTRG.2148	ENSRNOG00000002949	-0.9746162968157502	0.00019449563344631216
1357	ENSRNOG00000070022	ENSRNOG00000005993	-0.9745976802057056	1.9485048097256374e-4
1358	ENSRNOG00000066622	ENSRNOG00000059445	-0.9745671938067366	1.9543240832353703e-4
1359	MSTRG.15404	ENSRNOG00000007243	-0.9745649741920315	1.9547481691084556e-4
1360	MSTRG.2148	ENSRNOG00000007512	-0.9745576186449932	1.9561539324897126e-4
1361	ENSRNOG00000069426	ENSRNOG00000003543	-0.9745551363299153	1.9566284786698418e-4
1362	ENSRNOG00000065346	ENSRNOG00000031665	-0.9745532908834131	1.956981318600448e-4
1363	ENSRNOG00000065346	ENSRNOG00000020167	-0.9745395263152196	1.95961422894797e-4
1364	MSTRG.12581	ENSRNOG00000012151	-0.9745162161446138	1.9640778475893406e-4
1365	ENSRNOG00000066884	ENSRNOG00000026067	-0.974509811201819	1.9653053768142748e-4
1366	ENSRNOG00000066622	ENSRNOG00000027350	-0.9745041137328272	1.96639770014162e-4
1367	ENSRNOG00000070022	ENSRNOG00000009323	-0.9744636636820194	1.9741632118952523e-4
1368	ENSRNOG00000065163	ENSRNOG00000003543	-0.9744627654801366	1.9743358536050692e-4
1369	ENSRNOG00000066873	ENSRNOG00000026051	-0.97446190626434	1.9745010102845129e-4
1370	ENSRNOG00000062871	ENSRNOG00000004589	-0.9744599006725005	1.974886553006705e-4
1371	ENSRNOG00000069674	ENSRNOG00000006503	-0.9744598991538972	1.9748868449509516e-4
1372	ENSRNOG00000065163	ENSRNOG00000023299	-0.9744584447213667	1.9751664642431166e-4
1373	ENSRNOG00000067105	ENSRNOG00000007923	-0.9744576509033875	1.9753190882276783e-4
1374	ENSRNOG00000063579	ENSRNOG00000010958	-0.9744486108909847	1.977057668112181e-4
1375	ENSRNOG00000063579	ENSRNOG00000008236	-0.9744457736692917	1.9776035118734825e-4
1376	ENSRNOG00000067408	ENSRNOG00000019208	-0.9744369852978412	1.9792948472874272e-4
1377	ENSRNOG00000063993	ENSRNOG00000020105	-0.9744219030196286	1.982199461705303e-4
1378	ENSRNOG00000064499	ENSRNOG00000009691	-0.9744148827138692	1.9835523296407587e-4
1379	ENSRNOG00000069144	ENSRNOG00000011250	-0.9744082803324885	1.9848251618737045e-4
1380	MSTRG.2148	ENSRNOG00000012269	-0.9743989840235138	1.9866181641137182e-4
1381	ENSRNOG00000063579	ENSRNOG00000046468	-0.9743986156151031	1.98668923982126e-4
1382	ENSRNOG00000064568	ENSRNOG00000054460	-0.9743788683268055	1.990501229323094e-4
1383	ENSRNOG00000067921	ENSRNOG00000008966	-0.9743767928755938	1.9909021243136316e-4
1384	ENSRNOG00000067105	ENSRNOG00000024839	-0.9743569595285281	1.9947355668836764e-4
1385	ENSRNOG00000063392	ENSRNOG00000021062	-0.9743388433710649	1.99824094460066e-4
1386	ENSRNOG00000065163	ENSRNOG00000022353	-0.9743365580400258	1.9986834040564005e-4
1387	ENSRNOG00000062871	ENSRNOG00000013747	-0.9742899174584447	2.0077261637307942e-4
1388	ENSRNOG00000066622	ENSRNOG00000013981	-0.9742852011940818	2.008641915072218e-4
1389	ENSRNOG00000067835	ENSRNOG00000013663	-0.9742771948802431	2.0101970607666608e-4
1390	ENSRNOG00000065346	ENSRNOG00000031851	-0.9742671957232032	2.0121403027539841e-4
1391	ENSRNOG00000067921	ENSRNOG00000014980	-0.9742555389449603	2.0144070994509988e-4
1392	ENSRNOG00000063209	ENSRNOG00000014025	-0.9742537484200777	2.0147554225902198e-4
1393	ENSRNOG00000069426	ENSRNOG00000007477	-0.9742525379117658	2.0149909314337577e-4
1394	ENSRNOG00000068224	ENSRNOG00000004918	-0.9742386279554688	2.0176983410880034e-4
1395	ENSRNOG00000065786	ENSRNOG00000022567	-0.9742235327407959	2.0206388970400724e-4
1396	MSTRG.4435	ENSRNOG00000053687	-0.97421645320274175	2.0220188733865996e-4
1397	ENSRNOG00000063579	ENSRNOG00000021125	-0.97419752465653	2.0257112689114898e-4
1398	ENSRNOG00000066884	ENSRNOG00000061004	-0.9741873274339274	2.0277021061243516e-4
1399	ENSRNOG00000067921	ENSRNOG00000018279	-0.97418543537415	2.0280716272491617e-4
1400	ENSRNOG00000069426	ENSRNOG00000007490	-0.974178579617962	2.0294108990048798e-4
1401	ENSRNOG00000070022	ENSRNOG00000013521	-0.974168721241872	2.031337655372667e-4
1402	ENSRNOG00000063209	ENSRNOG00000022555	-0.9741599959660548	2.0330438628990422e-4
1403	ENSRNOG00000066031	ENSRNOG00000002408	-0.9741494094570954	2.0351151757469488e-4
1404	ENSRNOG00000071185	ENSRNOG00000006615	-0.9741266980609405	2.0395630324254732e-4
1405	MSTRG.2148	ENSRNOG00000020167	-0.9740975676790674	2.04527646599173e-4
1406	ENSRNOG00000063348	ENSRNOG00000034075	-0.9740902238119098	2.0467183440731063e-4
1407	ENSRNOG00000063209	ENSRNOG00000046566	-0.9740876994895803	2.047214103488848e-4
1408	ENSRNOG00000068224	ENSRNOG00000005985	-0.9740693852664747	2.0508130312757444e-4
1409	ENSRNOG00000063209	ENSRNOG00000069278	-0.9740669854585137	2.0512848964582275e-4
1410	ENSRNOG00000067235	ENSRNOG00000020652	-0.9740433592622187	2.0559338776360292e-4
1411	ENSRNOG00000065346	ENSRNOG00000025823	-0.9740328789806253	2.0579981136026326e-4
1412	ENSRNOG00000065376	ENSRNOG00000018812	-0.9740214206501229	2.0602564014637892e-4
1413	MSTRG.9597	ENSRNOG00000003616	-0.9740134961485986	2.061819080338978e-4
1414	ENSRNOG00000070022	ENSRNOG00000050834	-0.9740079476578013	2.0629136396776993e-4
1415	ENSRNOG00000066075	ENSRNOG00000060843	-0.9739997967821583	2.0645222028381482e-4
1416	ENSRNOG00000003984	ENSRNOG00000011526	-0.9739884845709024	2.0667558880393955e-4
1417	ENSRNOG00000066622	ENSRNOG00000006037	-0.973987402883248	2.0669695511266184e-4
1418	ENSRNOG00000065376	ENSRNOG00000020652	-0.9739808384545519	2.0682664885995905e-4
1419	ENSRNOG00000065346	ENSRNOG00000012665	-0.9739711960005696	2.07017243149199e-4
1420	ENSRNOG00000064826	ENSRNOG00000011973	-0.9739690318861062	2.0706003374604265e-4
1421	ENSRNOG00000067151	ENSRNOG00000064569	-0.9739677566207104	2.0708525177592918e-4
1422	ENSRNOG00000067151	ENSRNOG00000064059	-0.9739514819191273	2.074072402198368e-4
1423	ENSRNOG00000065346	ENSRNOG00000023657	-0.9739439155573926	2.0755703909625112e-4
1424	ENSRNOG00000065163	ENSRNOG00000052572	-0.9739305868195959	2.078210781848444e-4
1425	ENSRNOG00000064438	ENSRNOG00000010580	-0.9739151760948622	2.0812661011015976e-4
1426	ENSRNOG00000071185	ENSRNOG00000014902	-0.9739105090689557	2.082191909602571e-4
1427	ENSRNOG00000070022	ENSRNOG00000064569	-0.9738928945016935	2.0856883602737852e-4
1428	ENSRNOG00000062871	ENSRNOG00000000245	-0.9738855307664678	2.087151080050198e-4
1429	ENSRNOG00000066031	ENSRNOG00000024456	-0.9738799181240747	2.0882663758170494e-4
1430	ENSRNOG00000070022	ENSRNOG00000053875	-0.9738756281213762	2.0891190872807108e-4
1431	ENSRNOG00000066075	ENSRNOG00000017064	-0.9738727251592808	2.089696218274817e-4
1432	ENSRNOG00000063579	ENSRNOG00000014659	-0.9738720374784943	2.0898329483642897e-4
1433	ENSRNOG00000064699	ENSRNOG00000064589	-0.9738649352583842	2.0912453790788987e-4
1434	ENSRNOG00000070022	ENSRNOG00000023721	-0.9738620651838146	2.0918163169492132e-4
1435	ENSRNOG00000063348	ENSRNOG00000011521	-0.9738534426577998	2.0935321360382453e-4
1436	ENSRNOG00000063209	ENSRNOG00000033503	-0.9738519620732942	2.093826845706026e-4
1437	ENSRNOG00000051306	ENSRNOG00000036680	-0.9738450207551052	2.0952088412728997e-4
1438	ENSRNOG00000065163	ENSRNOG00000017409	-0.9738410826807372	2.0959931414354926e-4
1439	ENSRNOG00000062871	ENSRNOG00000012123	-0.9738292938250235	2.0983420345910275e-4
1440	ENSRNOG00000063594	ENSRNOG00000068201	-0.9738272295688674	2.0987534924321594e-4
1441	MSTRG.2148	ENSRNOG00000017434	-0.9738252612798168	2.0991458663655038e-4
1442	ENSRNOG00000064568	ENSRNOG00000028636	-0.9738129529999576	2.1016004844165437e-4
1443	MSTRG.13181	ENSRNOG00000018543	-0.9738034370091071	2.1034994121515993e-4
1444	ENSRNOG00000070022	ENSRNOG00000006741	-0.9737916045683209	2.1058620147318408e-4
1445	ENSRNOG00000071212	ENSRNOG00000010270	-0.9737814436678729	2.1078921185146982e-4
1446	ENSRNOG00000068246	ENSRNOG00000004317	-0.9737813715593948	2.1079065296358834e-4
1447	ENSRNOG00000069674	ENSRNOG00000010454	-0.9737640873558947	2.1113625285096305e-4
1448	ENSRNOG00000063579	ENSRNOG00000027839	-0.9737607887309423	2.1120224759219042e-4
1449	ENSRNOG00000069426	ENSRNOG00000023847	-0.9737604706186945	2.1120861263135282e-4
1450	ENSRNOG00000068224	ENSRNOG00000002092	-0.9737589382529636	2.112392750062142e-4
1451	ENSRNOG00000067835	ENSRNOG00000014162	-0.9737540454753657	2.1133719638566362e-4
1452	ENSRNOG00000065163	ENSRNOG00000065330	-0.9737426518047089	2.1156532781962945e-4
1453	ENSRNOG00000066622	ENSRNOG00000067070	-0.9737422223357497	2.1157392979076484e-4
1454	ENSRNOG00000067921	ENSRNOG00000014525	-0.9737317114668651	2.1178452025893968e-4
1455	ENSRNOG00000067235	ENSRNOG00000050794	-0.9737004371975201	2.12411853655059e-4
1456	MSTRG.5149	ENSRNOG00000020105	-0.9736966998502223	2.1248689534925091e-4
1457	ENSRNOG00000067835	ENSRNOG00000058497	-0.9736818907500705	2.1278440045824354e-4
1458	ENSRNOG00000067151	ENSRNOG00000066547	-0.9736595331352539	2.1323401986950152e-4
1459	ENSRNOG00000067151	ENSRNOG00000069584	-0.9736505187898378	2.1341546135045242e-4
1460	ENSRNOG00000062871	ENSRNOG00000060141	-0.9736466252469921	2.1349385931435094e-4
1461	MSTRG.9891	ENSRNOG00000002092	-0.9736271217363521	2.1388682795975278e-4
1462	ENSRNOG00000066622	ENSRNOG00000009068	-0.9736151844180593	2.1412756062821892e-4
1463	ENSRNOG00000067743	ENSRNOG00000068425	-0.9735959104806376	2.1451658680970986e-4
1464	ENSRNOG00000066622	ENSRNOG00000061379	-0.9735863454988585	2.147098030191863e-4
1465	ENSRNOG00000063579	ENSRNOG00000020193	-0.9735742418000591	2.149544507235035e-4
1466	ENSRNOG00000066884	ENSRNOG00000015945	-0.9735664846322952	2.1511133078644384e-4
1467	MSTRG.2148	ENSRNOG00000003232	-0.9735646666804069	2.151481066914318e-4
1468	ENSRNOG00000070022	ENSRNOG00000065713	-0.9735605568182867	2.1523126014555416e-4
1469	ENSRNOG00000067743	ENSRNOG00000018938	-0.9735433466661422	2.1557967515706267e-4
1470	ENSRNOG00000066622	ENSRNOG00000008000	-0.973538203747755	2.1568385730752482e-4
1471	ENSRNOG00000001277	ENSRNOG00000020546	-0.9735310254084376	2.1582932190056248e-4
1472	MSTRG.2148	ENSRNOG00000065120	-0.973521613536784	2.160201361145475e-4
1473	ENSRNOG00000063348	ENSRNOG00000017150	-0.9735211652621206	2.160292268409414e-4
1474	ENSRNOG00000066622	ENSRNOG00000001436	-0.9735202718027598	2.1604734631086586e-4
1475	ENSRNOG00000066622	ENSRNOG00000014508	-0.9735094341238505	2.1626720787759623e-4
1476	ENSRNOG00000067701	ENSRNOG00000020013	-0.9734912828301039	2.166357373787342e-4
1477	ENSRNOG00000067835	ENSRNOG00000050445	-0.9734899764124274	2.1666227626093715e-4
1478	ENSRNOG00000063179	ENSRNOG00000055382	-0.9734697435215288	2.170735391948675e-4
1479	ENSRNOG00000063579	ENSRNOG00000032745	-0.9734696083525257	2.1707628826295178e-4
1480	ENSRNOG00000063348	ENSRNOG00000012054	-0.9734652572579575	2.1716479192335214e-4
1481	ENSRNOG00000061154	ENSRNOG00000019265	-0.9734526123500353	2.1742211823383428e-4
1482	ENSRNOG00000065346	ENSRNOG00000069743	-0.9734456235825691	2.1756441884868138e-4
1483	ENSRNOG00000065786	ENSRNOG00000008026	-0.9734248369238684	2.179879905601645e-4
1484	ENSRNOG00000067047	ENSRNOG00000027145	-0.9734209026226495	2.1806821539360755e-4
1485	MSTRG.17027	ENSRNOG00000068162	-0.9734200342385605	2.180859250910938e-4
1486	ENSRNOG00000062838	ENSRNOG00000030726	-0.973416462575674	2.1815877406172746e-4
1487	ENSRNOG00000064499	ENSRNOG00000017064	-0.9734006809700408	2.184808350027545e-4
1488	ENSRNOG00000070376	ENSRNOG00000057153	-0.9733971289040391	2.1855336229759104e-4
1489	ENSRNOG00000067151	ENSRNOG00000006783	-0.9733865130705279	2.187702054299301e-4
1490	ENSRNOG00000069161	ENSRNOG00000017258	-0.9733751680148226	2.1900208546554722e-4
1491	ENSRNOG00000063348	ENSRNOG00000069578	-0.9733697708727	2.1911244824890375e-4
1492	ENSRNOG00000065163	ENSRNOG00000067378	-0.9733511700105051	2.194930593051314e-4
1493	ENSRNOG00000066075	ENSRNOG00000011332	-0.9733391810884299	2.1973858521118217e-4
1494	ENSRNOG00000069611	ENSRNOG00000031974	-0.9733341942201483	2.1984076139736075e-4
1495	MSTRG.9597	ENSRNOG00000020424	-0.9733288078929007	2.1995115388562247e-4
1496	ENSRNOG00000062746	ENSRNOG00000038331	-0.9733231504428752	2.200671385477193e-4
1497	ENSRNOG00000065163	ENSRNOG00000011000	-0.9733083338440004	2.20371069510783e-4
1498	ENSRNOG00000062746	ENSRNOG00000047848	-0.9732941559934835	2.2066213174176674e-4
1499	ENSRNOG00000067835	ENSRNOG00000016758	-0.9732862968023641	2.2082357446118195e-4
1500	ENSRNOG00000067743	ENSRNOG00000052549	-0.9732828795407644	2.2089379343492865e-4
1501	ENSRNOG00000065163	ENSRNOG00000012892	-0.9732780838482765	2.2099235925709948e-4
1502	MSTRG.2148	ENSRNOG00000014765	-0.9732546198823895	2.2147499134250737e-4
1503	ENSRNOG00000071185	ENSRNOG00000015865	-0.973220947139449	2.2216870400737498e-4
1504	ENSRNOG00000071119	ENSRNOG00000018426	-0.9732062301245832	2.2247230384508931e-4
1505	ENSRNOG00000070376	ENSRNOG00000020525	-0.9731809656298859	2.229940650948503e-4
1506	ENSRNOG00000067151	ENSRNOG00000011425	-0.973179343443002	2.230275912888935e-4
1507	ENSRNOG00000067835	ENSRNOG00000050585	-0.9731790515035782	2.230336252020404e-4
1508	MSTRG.7821	ENSRNOG00000021800	-0.9731654712940141	2.2331441345313507e-4
1509	ENSRNOG00000063579	ENSRNOG00000007512	-0.9731645939123483	2.2333256167716975e-4
1510	ENSRNOG00000063634	ENSRNOG00000028085	-0.9731625505537989	2.2337483098411326e-4
1511	MSTRG.9891	ENSRNOG00000069221	-0.9731556804504155	2.2351698218248117e-4
1512	ENSRNOG00000063348	ENSRNOG00000036684	-0.9731316048311921	2.2401556240359e-4
1513	ENSRNOG00000063209	ENSRNOG00000024456	-0.9731258499488529	2.24134837777612e-4
1514	ENSRNOG00000070376	ENSRNOG00000017481	-0.9731198149586333	2.2425995925301478e-4
1515	ENSRNOG00000071003	ENSRNOG00000009063	-0.973110187704374	2.2445964401529572e-4
1516	ENSRNOG00000067004	ENSRNOG00000021062	-0.9731037323651484	2.2459359740678586e-4
1517	ENSRNOG00000066622	ENSRNOG00000006400	-0.9730896185134283	2.248866367167146e-4
1518	ENSRNOG00000063579	ENSRNOG00000070513	-0.9730787431890778	2.2511259116719806e-4
1519	ENSRNOG00000063348	ENSRNOG00000004608	-0.9730722080969947	2.2524843445204112e-4
1520	ENSRNOG00000064499	ENSRNOG00000029212	-0.97306039964071	2.2549401752969267e-4
1521	MSTRG.9891	ENSRNOG00000042041	-0.973059019674115	2.2552272739662094e-4
1522	ENSRNOG00000067835	ENSRNOG00000066547	-0.9730549939032476	2.256064950056924e-4
1523	ENSRNOG00000067835	ENSRNOG00000048114	-0.9730393727947511	2.259317119390758e-4
1524	ENSRNOG00000066622	ENSRNOG00000036942	-0.9730376228042302	2.2596816248365847e-4
1525	ENSRNOG00000063209	ENSRNOG00000004459	-0.9730347201214707	2.2602863016762953e-4
1526	MSTRG.15606	ENSRNOG00000020013	-0.9730337332230595	2.2604919108815125e-4
1527	ENSRNOG00000067105	ENSRNOG00000021438	-0.9730138878979062	2.2646288247107904e-4
1528	ENSRNOG00000071003	ENSRNOG00000018279	-0.9730002317664567	2.2674781681142342e-4
1529	ENSRNOG00000066818	ENSRNOG00000017512	-0.9729990978672475	2.2677148513827738e-4
1530	ENSRNOG00000063348	ENSRNOG00000059540	-0.9729944546979428	2.2686841918861944e-4
1531	ENSRNOG00000070022	ENSRNOG00000003494	-0.9729917686687747	2.269245058716951e-4
1532	ENSRNOG00000063238	ENSRNOG00000021812	-0.9729834882353681	2.270974606402021e-4
1533	ENSRNOG00000065163	ENSRNOG00000016835	-0.9729729283844523	2.273181397836055e-4
1534	ENSRNOG00000066622	ENSRNOG00000031934	-0.9729654118539212	2.2747529753242013e-4
1535	ENSRNOG00000064438	ENSRNOG00000020652	-0.9729650932613318	2.274819601848499e-4
1536	ENSRNOG00000066622	ENSRNOG00000016758	-0.9729558346486301	0.00022767563413084169
1537	ENSRNOG00000063209	ENSRNOG00000007060	-0.9729494798217461	2.2780862275206815e-4
1538	ENSRNOG00000063634	ENSRNOG00000019412	-0.9729405679464427	2.2799520106664417e-4
1539	ENSRNOG00000067835	ENSRNOG00000002949	-0.9729391246771054	2.2802542579425378e-4
1540	ENSRNOG00000063348	ENSRNOG00000019982	-0.9729315499901394	2.281840928455292e-4
1541	ENSRNOG00000067835	ENSRNOG00000006615	-0.972909490839502	2.2864654041954147e-4
1542	ENSRNOG00000063579	ENSRNOG00000005061	-0.9728927674412305	2.2899750086091686e-4
1543	ENSRNOG00000067835	ENSRNOG00000003967	-0.9728790730968628	2.2928513164588438e-4
1544	ENSRNOG00000067151	ENSRNOG00000019170	-0.9728563654589538	2.2976254792927975e-4
1545	MSTRG.9891	ENSRNOG00000012892	-0.9728506101961008	2.2988364324039168e-4
1546	ENSRNOG00000067408	ENSRNOG00000011200	-0.9728437094360239	2.3002889079903888e-4
1547	MSTRG.15404	ENSRNOG00000035553	-0.9728290987779823	2.3033659692073272e-4
1548	MSTRG.7821	ENSRNOG00000028636	-0.9728225454554036	2.304746919792322e-4
1549	MSTRG.2148	ENSRNOG00000014948	-0.9727981046773054	2.3099015547511925e-4
1550	ENSRNOG00000067835	ENSRNOG00000015865	-0.9727931369407096	2.3109501038898195e-4
1551	ENSRNOG00000062838	ENSRNOG00000067321	-0.972792430832396	2.3110991664410108e-4
1552	MSTRG.12581	ENSRNOG00000015562	-0.9727859267056789	2.312472485157535e-4
1553	ENSRNOG00000066075	ENSRNOG00000036670	-0.9727439731111938	2.3213424795076598e-4
1554	ENSRNOG00000070797	ENSRNOG00000047692	-0.9727332826110601	2.3236059392273134e-4
1555	ENSRNOG00000065394	ENSRNOG00000025518	-0.9727033097811578	2.3299589773628782e-4
1556	MSTRG.12581	ENSRNOG00000016234	-0.9727015604362347	2.330330087259025e-4
1557	ENSRNOG00000069161	ENSRNOG00000020532	-0.972697404324631	2.3312119150364907e-4
1558	ENSRNOG00000065846	ENSRNOG00000019570	-0.9726837795915896	2.334104151184846e-4
1559	ENSRNOG00000066622	ENSRNOG00000063905	-0.9726768977524445	2.3355658281865033e-4
1560	ENSRNOG00000070797	ENSRNOG00000026745	-0.9726677767638214	2.3375039315576274e-4
1561	ENSRNOG00000063579	ENSRNOG00000008822	-0.9726558967854306	2.3400297229025924e-4
1562	ENSRNOG00000070797	ENSRNOG00000010270	-0.9726549166067496	2.3402381903014913e-4
1563	ENSRNOG00000070376	ENSRNOG00000010580	-0.972643940084315	2.3425734657056552e-4
1564	ENSRNOG00000063579	ENSRNOG00000026646	-0.9726427518025664	2.3428263580038688e-4
1565	ENSRNOG00000067047	ENSRNOG00000008271	-0.9726291220685676	2.3457282251371225e-4
1566	ENSRNOG00000063209	ENSRNOG00000014162	-0.972621290285505	2.3473966346543307e-4
1567	ENSRNOG00000062871	ENSRNOG00000055365	-0.9726151320814405	2.34870901649753e-4
1568	ENSRNOG00000070797	ENSRNOG00000019985	-0.972603641725459	2.3511589066638194e-4
1569	ENSRNOG00000069144	ENSRNOG00000016196	-0.9725922108575378	2.3535976217670118e-4
1570	ENSRNOG00000066622	ENSRNOG00000005615	-0.9725694959227804	2.3584481996064e-4
1571	ENSRNOG00000067047	ENSRNOG00000019147	-0.9725651593813543	2.359374906262257e-4
1572	ENSRNOG00000067235	ENSRNOG00000012428	-0.9725628482796349	2.3598688706849558e-4
1573	ENSRNOG00000064438	ENSRNOG00000020525	-0.9725454351039488	2.3635926631282445e-4
1574	ENSRNOG00000063579	ENSRNOG00000032922	-0.9725324397663606	2.366373982158887e-4
1575	ENSRNOG00000071185	ENSRNOG00000009296	-0.9725314725259816	2.3665810730255643e-4
1576	ENSRNOG00000063392	ENSRNOG00000025075	-0.9725196010246197	2.3691236978340413e-4
1577	ENSRNOG00000066622	ENSRNOG00000019490	-0.9725182997647467	2.3694024990361662e-4
1578	ENSRNOG00000063209	ENSRNOG00000020167	-0.9725179108118723	2.3694858378564554e-4
1579	ENSRNOG00000064568	ENSRNOG00000011277	-0.97250858855145	2.3714837899824204e-4
1580	ENSRNOG00000071119	ENSRNOG00000028015	-0.9725071381778048	2.3717947249801696e-4
1581	ENSRNOG00000066818	ENSRNOG00000019296	-0.9725023464578914	2.372822159268928e-4
1582	ENSRNOG00000063179	ENSRNOG00000050207	-0.9725009120856446	2.373129766990445e-4
1583	ENSRNOG00000067835	ENSRNOG00000064025	-0.9725003368410448	2.3732531375042498e-4
1584	ENSRNOG00000063993	ENSRNOG00000031789	-0.9724945234957153	2.374500117714451e-4
1585	ENSRNOG00000067835	ENSRNOG00000026646	-0.9724788490931923	2.377864267510965e-4
1586	ENSRNOG00000067151	ENSRNOG00000014980	-0.972476439251608	2.3783817359790405e-4
1587	ENSRNOG00000067047	ENSRNOG00000000036	-0.9724642932019137	2.3809908934646629e-4
1588	ENSRNOG00000062871	ENSRNOG00000011752	-0.9724508643670944	2.383877594920314e-4
1589	ENSRNOG00000064826	ENSRNOG00000020705	-0.9724382088522094	2.3865999668304383e-4
1590	MSTRG.9891	ENSRNOG00000012815	-0.9724359836659013	2.3870788255830888e-4
1591	ENSRNOG00000066884	ENSRNOG00000018267	-0.9724307996720255	2.3881946397175113e-4
1592	ENSRNOG00000063209	ENSRNOG00000056728	-0.9724201683740962	2.3904839143740197e-4
1593	ENSRNOG00000063348	ENSRNOG00000037753	-0.9724128495765277	2.3920606554450607e-4
1594	ENSRNOG00000064568	ENSRNOG00000011977	-0.9724024916762647	2.394293189820207e-4
1595	ENSRNOG00000070930	ENSRNOG00000010634	-0.9723923409135594	2.3964822806066266e-4
1596	MSTRG.12581	ENSRNOG00000038331	-0.9723839938343791	2.398283285200975e-4
1597	ENSRNOG00000067835	ENSRNOG00000020124	-0.9723837644531456	2.398332788930979e-4
1598	ENSRNOG00000065346	ENSRNOG00000002425	-0.9723739643071492	2.400448367736452e-4
1599	ENSRNOG00000065163	ENSRNOG00000017060	-0.9723734223627725	2.4005653908409919e-4
1600	ENSRNOG00000065786	ENSRNOG00000018454	-0.9723577050827217	2.4039607309411792e-4
1601	ENSRNOG00000064499	ENSRNOG00000025480	-0.9723487343371439	2.405899925026489e-4
1602	ENSRNOG00000066075	ENSRNOG00000004195	-0.97234860889593	2.4059270480836226e-4
1603	ENSRNOG00000071212	ENSRNOG00000031593	-0.9723386421331289	2.408082655760424e-4
1604	ENSRNOG00000064499	ENSRNOG00000020907	-0.9723367290726035	2.4084965431980798e-4
1605	ENSRNOG00000066622	ENSRNOG00000007060	-0.9723191100517661	2.412310379340532e-4
1606	ENSRNOG00000066622	ENSRNOG00000018081	-0.9723186550284617	2.4124089218524603e-4
1607	ENSRNOG00000070376	ENSRNOG00000017558	-0.972313073763503	2.4136178281786158e-4
1608	ENSRNOG00000067835	ENSRNOG00000043128	-0.9723118142537643	2.4138906888149236e-4
1609	ENSRNOG00000063579	ENSRNOG00000059705	-0.9723114056791792	2.4139792065014376e-4
1610	ENSRNOG00000063993	ENSRNOG00000009515	-0.9723099228609645	2.4143004753063302e-4
1611	ENSRNOG00000065394	ENSRNOG00000066139	-0.9722683892541676	2.4233095261827486e-4
1612	ENSRNOG00000066622	ENSRNOG00000006735	-0.9722639755876368	2.4242680681840767e-4
1613	ENSRNOG00000064699	ENSRNOG00000031779	-0.9722549526904988	2.4262283260467754e-4
1614	ENSRNOG00000066031	ENSRNOG00000009085	-0.9722481304023606	2.4277111195081247e-4
1615	ENSRNOG00000068224	ENSRNOG00000028344	-0.9722212737601923	2.4335535288289023e-4
1616	ENSRNOG00000063556	ENSRNOG00000064803	-0.9722195673777322	2.4339250186411476e-4
1617	MSTRG.9597	ENSRNOG00000019830	-0.9722183651446012	2.4341867723531863e-4
1618	MSTRG.7821	ENSRNOG00000026675	-0.9722183609708746	2.4341876810973773e-4
1619	ENSRNOG00000065346	ENSRNOG00000058497	-0.9722182733289347	2.4342067634153253e-4
1620	MSTRG.9597	ENSRNOG00000065330	-0.972199748867256	2.4382421009438993e-4
1621	ENSRNOG00000062746	ENSRNOG00000068024	-0.9721959979562581	2.4390596773860018e-4
1622	MSTRG.9891	ENSRNOG00000064399	-0.97219464567110625	2.4393544715151094e-4
1623	ENSRNOG00000063579	ENSRNOG00000018145	-0.9721872293714756	2.4409715797313325e-4
1624	ENSRNOG00000064438	ENSRNOG00000033010	-0.9721780998982561	2.4429631176081656e-4
1625	MSTRG.4435	ENSRNOG00000039582	-0.9721722182903536	2.4442466658203266e-4
1626	ENSRNOG00000067595	ENSRNOG00000001229	-0.9721694436516323	2.444852316840773e-4
1627	ENSRNOG00000070376	ENSRNOG00000059445	-0.9721469206072971	2.4497719753258096e-4
1628	ENSRNOG00000066622	ENSRNOG00000015865	-0.9721438836733458	2.450435776382154e-4
1629	ENSRNOG00000065376	ENSRNOG00000014659	-0.972122317968496	2.4551526020255565e-4
1630	ENSRNOG00000067290	ENSRNOG00000048187	-0.9721175911850611	2.456187159844969e-4
1631	ENSRNOG00000067835	ENSRNOG00000033503	-0.972117104996247	2.456293587393965e-4
1632	ENSRNOG00000064568	ENSRNOG00000058940	-0.9721146886051266	2.4568225801946397e-4
1633	ENSRNOG00000066622	ENSRNOG00000050445	-0.9721062359940824	2.458673546741341e-4
1634	MSTRG.5149	ENSRNOG00000027350	-0.9720915953787846	2.461881535600341e-4
1635	MSTRG.2148	ENSRNOG00000003269	-0.972090861763539	2.4620423477239584e-4
1636	ENSRNOG00000061154	ENSRNOG00000001544	-0.9720788666476089	2.464672623736508e-4
1637	ENSRNOG00000065697	ENSRNOG00000068605	-0.9720636154193166	2.4680193102799564e-4
1638	ENSRNOG00000063209	ENSRNOG00000005993	-0.9720610115644579	2.468590962951822e-4
1639	ENSRNOG00000063556	ENSRNOG00000009481	-0.9720524649748444	2.4704678427678317e-4
1640	MSTRG.9891	ENSRNOG00000003726	-0.9720483976111761	2.4713613571591964e-4
1641	ENSRNOG00000062746	ENSRNOG00000048819	-0.9720454549895734	2.4720079092155345e-4
1642	ENSRNOG00000062871	ENSRNOG00000012054	-0.9720411541155713	2.472953077192752e-4
1643	ENSRNOG00000063209	ENSRNOG00000064025	-0.9720267322609955	2.476124019954451e-4
1644	ENSRNOG00000070022	ENSRNOG00000016643	-0.9720131278858357	2.479117439575518e-4
1645	ENSRNOG00000063348	ENSRNOG00000001245	-0.9719838931190354	2.48555735371081e-4
1646	ENSRNOG00000065163	ENSRNOG00000015717	-0.9719824660092322	2.485871975883569e-4
1647	ENSRNOG00000071185	ENSRNOG00000026646	-0.9719782895911768	2.486792849683006e-4
1648	ENSRNOG00000069426	ENSRNOG00000055530	-0.9719474170135073	2.4936063546610043e-4
1649	ENSRNOG00000071185	ENSRNOG00000014765	-0.971938847450716	2.495499604286966e-4
1650	ENSRNOG00000063579	ENSRNOG00000049771	-0.9719126972533263	2.5012821810665997e-4
1651	ENSRNOG00000065697	ENSRNOG00000014702	-0.9719076656839168	2.5023957225922544e-4
1652	MSTRG.13181	ENSRNOG00000004473	-0.9718999222524245	2.504110005201454e-4
1653	ENSRNOG00000063579	ENSRNOG00000065713	-0.9718976710196038	2.504608526336938e-4
1654	ENSRNOG00000066622	ENSRNOG00000052665	-0.9718956756409449	2.505050439571832e-4
1655	ENSRNOG00000063579	ENSRNOG00000001979	-0.9718911845570182	2.5060452422787094e-4
1656	ENSRNOG00000068224	ENSRNOG00000031849	-0.9718883877636192	2.506664867976127e-4
1657	ENSRNOG00000063209	ENSRNOG00000002408	-0.9718855881671059	2.5072852059970785e-4
1658	ENSRNOG00000063348	ENSRNOG00000007060	-0.9718759205041269	2.5094280809589975e-4
1659	MSTRG.9891	ENSRNOG00000004874	-0.9718675201232456	2.51129094251068e-4
1660	ENSRNOG00000064568	ENSRNOG00000025518	-0.9718577029162379	2.5134690407524474e-4
1661	ENSRNOG00000067151	ENSRNOG00000011302	-0.9718564919891772	2.513737781377756e-4
1662	ENSRNOG00000070376	ENSRNOG00000032238	-0.9718512975395575	2.5148907777872154e-4
1663	ENSRNOG00000063209	ENSRNOG00000009481	-0.9718507149734974	2.5150201078494305e-4
1664	ENSRNOG00000064568	ENSRNOG00000060356	-0.9718451044390186	2.5162658529365167e-4
1665	ENSRNOG00000070376	ENSRNOG00000037500	-0.9718313575625398	2.5193197170625403e-4
1666	ENSRNOG00000064568	ENSRNOG00000007713	-0.9718280475976968	2.520055353936179e-4
1667	ENSRNOG00000067921	ENSRNOG00000001869	-0.9718264577822703	2.5204087345009896e-4
1668	ENSRNOG00000066622	ENSRNOG00000003858	-0.9718213579229995	2.521542518643116e-4
1669	ENSRNOG00000063579	ENSRNOG00000020994	-0.9718011087363508	2.5260472465293837e-4
1670	ENSRNOG00000067047	ENSRNOG00000007687	-0.9717884101864132	2.528874666118952e-4
1671	MSTRG.4435	ENSRNOG00000026430	-0.9717774866368788	2.531308375677277e-4
1672	ENSRNOG00000070376	ENSRNOG00000003494	-0.9717633485440872	2.534460337051403e-4
1673	ENSRNOG00000065163	ENSRNOG00000004918	-0.9717592489949616	0.00025353747314049713
1674	ENSRNOG00000063348	ENSRNOG00000030245	-0.97175878022983	2.53547930082032e-4
1675	ENSRNOG00000067921	ENSRNOG00000017788	-0.9717416989284874	2.5392914494171137e-4
1676	ENSRNOG00000066031	ENSRNOG00000010064	-0.9717413317571105	2.539373430934244e-4
1677	ENSRNOG00000064699	ENSRNOG00000022567	-0.9717336728439323	2.541083861533622e-4
1678	ENSRNOG00000066622	ENSRNOG00000003969	-0.9717335779825956	2.5411050507861965e-4
1679	ENSRNOG00000063634	ENSRNOG00000070513	-0.9717280258805578	2.54234541137599e-4
1680	ENSRNOG00000069674	ENSRNOG00000003765	-0.9717248938969506	2.5430452672603465e-4
1681	ENSRNOG00000065786	ENSRNOG00000067691	-0.971723702637797	2.5433114895867526e-4
1682	ENSRNOG00000067235	ENSRNOG00000050834	-0.97172294498316	2.5434808187019264e-4
1683	ENSRNOG00000062687	ENSRNOG00000018279	-0.9717018025779098	2.548208665067442e-4
1684	ENSRNOG00000070022	ENSRNOG00000000184	-0.9717002502112428	2.548556009851488e-4
1685	ENSRNOG00000062838	ENSRNOG00000018109	-0.9716822025323036	2.5525962776873357e-4
1686	ENSRNOG00000070022	ENSRNOG00000017481	-0.971654996488525	2.5586939938371245e-4
1687	ENSRNOG00000063348	ENSRNOG00000018145	-0.9716468799482145	2.560514838454431e-4
1688	ENSRNOG00000067835	ENSRNOG00000011011	-0.9716304259697329	2.5642084485721917e-4
1689	ENSRNOG00000064499	ENSRNOG00000043419	-0.9716182358775165	2.5669469392575195e-4
1690	ENSRNOG00000070022	ENSRNOG00000008766	-0.971616381454976	2.567363685646029e-4
1691	ENSRNOG00000067835	ENSRNOG00000007512	-0.971607403635394	2.5693818500149845e-4
1692	ENSRNOG00000066622	ENSRNOG00000042419	-0.9715974227788646	2.571626599263688e-4
1693	ENSRNOG00000067235	ENSRNOG00000057347	-0.9715941988195397	2.5723519345977053e-4
1694	ENSRNOG00000065346	ENSRNOG00000037485	-0.9715901452112756	2.573264099388073e-4
1695	ENSRNOG00000063209	ENSRNOG00000020124	-0.9715874671137161	2.573866844906014e-4
1696	ENSRNOG00000063348	ENSRNOG00000037500	-0.9715870814651503	2.5739536477464853e-4
1697	ENSRNOG00000063634	ENSRNOG00000003063	-0.9715683724081798	2.5781668259061696e-4
1698	ENSRNOG00000068224	ENSRNOG00000053769	-0.9715555998048444	2.581045502187962e-4
1699	ENSRNOG00000063209	ENSRNOG00000061379	-0.9715507906553498	2.5821298787453983e-4
1700	ENSRNOG00000067151	ENSRNOG00000026646	-0.9715454804633038	2.583327546226144e-4
1701	ENSRNOG00000063634	ENSRNOG00000025815	-0.9715407228704963	2.584400860441427e-4
1702	ENSRNOG00000063179	ENSRNOG00000042460	-0.9715316091721581	2.5864576541012596e-4
1703	ENSRNOG00000063579	ENSRNOG00000042560	-0.9715313131276521	2.586524482213193e-4
1704	ENSRNOG00000066075	ENSRNOG00000043419	-0.9715242126955264	2.588127618223801e-4
1705	ENSRNOG00000068224	ENSRNOG00000057996	-0.971510892502376	2.591136646772352e-4
1706	MSTRG.9597	ENSRNOG00000001827	-0.9715079064960602	2.5918114703671336e-4
1707	ENSRNOG00000067835	ENSRNOG00000014980	-0.9715060723357037	2.5922260339505954e-4
1708	ENSRNOG00000066622	ENSRNOG00000049780	-0.971505067447041	2.592453179262044e-4
1709	ENSRNOG00000065346	ENSRNOG00000036942	-0.9714917151485175	2.595472460664716e-4
1710	ENSRNOG00000066622	ENSRNOG00000004697	-0.9714897218764531	2.595923367636477e-4
1711	ENSRNOG00000064826	ENSRNOG00000056550	-0.9714869691609499	2.5965461483190566e-4
1712	ENSRNOG00000067105	ENSRNOG00000012269	-0.9714778830530127	2.598602441223896e-4
1713	ENSRNOG00000066031	ENSRNOG00000021866	-0.971475488225573	2.5991445800754853e-4
1714	ENSRNOG00000065786	ENSRNOG00000014163	-0.9714720190206295	2.5999300548740223e-4
1715	ENSRNOG00000063209	ENSRNOG00000018456	-0.9714641005889536	2.601723423656388e-4
1716	ENSRNOG00000064826	ENSRNOG00000004699	-0.9714603878764894	2.602564533260576e-4
1717	ENSRNOG00000070022	ENSRNOG00000020652	-0.9714558488063976	2.603593072771915e-4
1718	MSTRG.12581	ENSRNOG00000001621	-0.9714415282024705	2.6068396631862e-4
1719	ENSRNOG00000070797	ENSRNOG00000029223	-0.9714299122411403	2.6094748588301186e-4
1720	ENSRNOG00000062838	ENSRNOG00000005619	-0.9714296486219677	2.609534681830006e-4
1721	MSTRG.15606	ENSRNOG00000062568	-0.971428500438407	2.60979524820959e-4
1722	ENSRNOG00000064438	ENSRNOG00000057153	-0.9714254910633948	2.6104782629454704e-4
1723	ENSRNOG00000067151	ENSRNOG00000017523	-0.9714199643003837	2.611732906894204e-4
1724	MSTRG.13181	ENSRNOG00000063584	-0.9714163582530136	2.6125517178776647e-4
1725	ENSRNOG00000070376	ENSRNOG00000019208	-0.9713997661268321	2.61632119471944e-4
1726	MSTRG.9891	ENSRNOG00000028456	-0.971388538291892	2.618873821420564e-4
1727	ENSRNOG00000070022	ENSRNOG00000007582	-0.9713797386313797	2.6208754426537695e-4
1728	ENSRNOG00000062871	ENSRNOG00000009683	-0.971348091563506	2.628081587958686e-4
1729	ENSRNOG00000064438	ENSRNOG00000055314	-0.9713409006150904	2.6297206330117007e-4
1730	ENSRNOG00000067151	ENSRNOG00000011011	-0.9713290611903714	2.632420537826974e-4
1731	ENSRNOG00000065163	ENSRNOG00000019065	-0.9713271655995797	2.632852968234012e-4
1732	ENSRNOG00000069611	ENSRNOG00000025480	-0.9713269112395516	2.632910997166782e-4
1733	ENSRNOG00000001277	ENSRNOG00000060842	-0.9713219826914503	2.634035531501322e-4
1734	ENSRNOG00000067743	ENSRNOG00000025251	-0.9712954540534969	2.640093412047406e-4
1735	ENSRNOG00000069674	ENSRNOG00000018267	-0.9712923709841815	2.640797975677067e-4
1736	ENSRNOG00000069541	ENSRNOG00000059579	-0.9712647992030919	2.6471038373632183e-4
1737	ENSRNOG00000067701	ENSRNOG00000028622	-0.971260188565654	2.648159196150246e-4
1738	ENSRNOG00000069674	ENSRNOG00000016196	-0.9712433438506102	2.6520170202637416e-4
1739	ENSRNOG00000063579	ENSRNOG00000001374	-0.9712303779216248	2.6549887898696944e-4
1740	ENSRNOG00000064826	ENSRNOG00000007882	-0.971218074900596	2.657810453090548e-4
1741	ENSRNOG00000071185	ENSRNOG00000027350	-0.9712174761440641	2.657947821720352e-4
1742	ENSRNOG00000063348	ENSRNOG00000003232	-0.9712171404801956	2.6580248326402156e-4
1743	ENSRNOG00000067595	ENSRNOG00000048472	-0.9712078995666003	2.660145484671972e-4
1744	ENSRNOG00000069674	ENSRNOG00000020424	-0.9711975770827274	2.6625155308046544e-4
1745	MSTRG.1333	ENSRNOG00000049976	-0.9711856332683962	2.665259402205855e-4
1746	ENSRNOG00000066622	ENSRNOG00000013408	-0.9711849969776518	2.665405625461581e-4
1747	ENSRNOG00000063179	ENSRNOG00000004327	-0.9711832488918304	2.6658073701657514e-4
1748	ENSRNOG00000063579	ENSRNOG00000046261	-0.9711804576924677	2.6664489176742023e-4
1749	ENSRNOG00000067408	ENSRNOG00000017716	-0.9711798774068584	2.6665823058458216e-4
1750	MSTRG.5149	ENSRNOG00000053875	-0.9711754247793748	2.667605947439533e-4
1751	ENSRNOG00000063209	ENSRNOG00000020994	-0.9711624297373749	2.6705947932748053e-4
1752	ENSRNOG00000063348	ENSRNOG00000020317	-0.9711554457086792	2.672201935141061e-4
1753	ENSRNOG00000068224	ENSRNOG00000001275	-0.9711458510177835	2.674410772078861e-4
1754	MSTRG.1333	ENSRNOG00000006628	-0.9711449237673717	2.6746242961062094e-4
1755	ENSRNOG00000067835	ENSRNOG00000014230	-0.9711408434231802	2.675564024201549e-4
1756	ENSRNOG00000066884	ENSRNOG00000006503	-0.9711385414342328	2.676094272917595e-4
1757	ENSRNOG00000066622	ENSRNOG00000056325	-0.9711380046617296	2.676217924086899e-4
1758	MSTRG.15606	ENSRNOG00000053942	-0.9711337064677753	2.677208180661417e-4
1759	ENSRNOG00000066818	ENSRNOG00000023657	-0.9711213149120683	2.6800642787216944e-4
1760	ENSRNOG00000064699	ENSRNOG00000030449	-0.9711200414804062	2.6803578913980886e-4
1761	ENSRNOG00000065376	ENSRNOG00000024839	-0.9711148612223065	2.6815524907619626e-4
1762	ENSRNOG00000066075	ENSRNOG00000069840	-0.9711146060586707	2.6816113412486686e-4
1763	ENSRNOG00000066622	ENSRNOG00000019949	-0.9711115648444655	2.6823128206343583e-4
1764	ENSRNOG00000067835	ENSRNOG00000017977	-0.971108904148993	2.6829266199790425e-4
1765	ENSRNOG00000071212	ENSRNOG00000003616	-0.9711010999851688	2.6847274547803224e-4
1766	ENSRNOG00000063348	ENSRNOG00000013463	-0.971095580270928	2.686001579870201e-4
1767	ENSRNOG00000062871	ENSRNOG00000016704	-0.9710906082042265	2.6871495984481797e-4
1768	ENSRNOG00000067408	ENSRNOG00000032238	-0.9710859983350744	2.688214248660614e-4
1769	ENSRNOG00000067835	ENSRNOG00000033498	-0.9710853898154501	2.6883548051337414e-4
1770	ENSRNOG00000071003	ENSRNOG00000037402	-0.971082157943181	2.689101379522718e-4
1771	ENSRNOG00000070797	ENSRNOG00000003726	-0.9710714314011163	2.691580134193128e-4
1772	ENSRNOG00000062871	ENSRNOG00000008713	-0.9710713107468805	2.691608023437375e-4
1773	ENSRNOG00000063348	ENSRNOG00000023993	-0.9710696419567004	2.6919937821512363e-4
1774	ENSRNOG00000063594	ENSRNOG00000070972	-0.9710685995461892	2.692234763186363e-4
1775	ENSRNOG00000063634	ENSRNOG00000063575	-0.9710670436054645	2.692594484323685e-4
1776	ENSRNOG00000070022	ENSRNOG00000006926	-0.9710550650792016	2.695364781877263e-4
1777	ENSRNOG00000003984	ENSRNOG00000027212	-0.9710483562473203	2.696917087208206e-4
1778	ENSRNOG00000071185	ENSRNOG00000016643	-0.9710474622546754	2.697123981481031e-4
1779	ENSRNOG00000067151	ENSRNOG00000006615	-0.9710446189051867	2.697782072851318e-4
1780	ENSRNOG00000063634	ENSRNOG00000022455	-0.9710434584853636	2.6980506786999925e-4
1781	ENSRNOG00000069541	ENSRNOG00000013971	-0.9710284536628453	2.70152532288348e-4
1782	ENSRNOG00000062838	ENSRNOG00000010833	-0.9710232884021754	2.702722050105244e-4
1783	ENSRNOG00000064499	ENSRNOG00000057996	-0.9710195668481582	2.703584483727539e-4
1784	MSTRG.4435	ENSRNOG00000069221	-0.9710041769719026	2.707152674816804e-4
1785	ENSRNOG00000066622	ENSRNOG00000020433	-0.9709995805908624	2.708218903175741e-4
1786	ENSRNOG00000065697	ENSRNOG00000048850	-0.970981636782139	2.7123837424669617e-4
1787	ENSRNOG00000063209	ENSRNOG00000027839	-0.9709731469200176	2.71435560490918e-4
1788	ENSRNOG00000063392	ENSRNOG00000020652	-0.97097272210004415	2.7144542963464247e-4
1789	ENSRNOG00000063579	ENSRNOG00000007354	-0.9709440534921583	2.7211193360021646e-4
1790	ENSRNOG00000062871	ENSRNOG00000014828	-0.9709417593054203	2.721653121713352e-4
1791	MSTRG.1333	ENSRNOG00000003280	-0.9709362406783527	2.7229373892634356e-4
1792	ENSRNOG00000065163	ENSRNOG00000055530	-0.9709355498059683	2.723098191048656e-4
1793	ENSRNOG00000067835	ENSRNOG00000014525	-0.9709300302656177	2.724383076797565e-4
1794	ENSRNOG00000062838	ENSRNOG00000016260	-0.9709235172197979	2.725899703035495e-4
1795	ENSRNOG00000064499	ENSRNOG00000027869	-0.9709234772188093	2.7259090192055524e-4
1796	ENSRNOG00000064568	ENSRNOG00000025480	-0.9709232935189793	2.7259518028710517e-4
1797	ENSRNOG00000064438	ENSRNOG00000015562	-0.970921978822428	2.7262580071751863e-4
1798	ENSRNOG00000063513	ENSRNOG00000048819	-0.970911673098155	2.728659009192391e-4
1799	ENSRNOG00000070376	ENSRNOG00000015375	-0.9709100381223191	2.7290400373614077e-4
1800	ENSRNOG00000063348	ENSRNOG00000014948	-0.9709079208358237	2.729533514198579e-4
1801	ENSRNOG00000067743	ENSRNOG00000016684	-0.9709063829697642	2.729891978550114e-4
1802	ENSRNOG00000061154	ENSRNOG00000067239	-0.9709037649412381	2.7305022846046967e-4
1803	ENSRNOG00000063209	ENSRNOG00000008424	-0.9709036952362153	2.7305185351145234e-4
1804	ENSRNOG00000062871	ENSRNOG00000068913	-0.970898629708545	2.7316996286042006e-4
1805	ENSRNOG00000064499	ENSRNOG00000007477	-0.9708839563631544	2.7351226244842763e-4
1806	ENSRNOG00000063556	ENSRNOG00000020105	-0.9708788425575701	2.7363161715587836e-4
1807	MSTRG.5149	ENSRNOG00000014765	-0.970877417190933	2.736648903114425e-4
1808	ENSRNOG00000065163	ENSRNOG00000020097	-0.9708763944884419	2.7368876532851694e-4
1809	ENSRNOG00000003984	ENSRNOG00000047692	-0.9708737175941621	2.7375126336348643e-4
1810	ENSRNOG00000067835	ENSRNOG00000065120	-0.9708715707286213	2.738013928360594e-4
1811	ENSRNOG00000067004	ENSRNOG00000042716	-0.9708549456627764	2.74189774261302e-4
1812	ENSRNOG00000064499	ENSRNOG00000052549	-0.9708367102272779	2.74616152515339e-4
1813	ENSRNOG00000063179	ENSRNOG00000017409	-0.9708358054400076	2.746373183808437e-4
1814	ENSRNOG00000065786	ENSRNOG00000017546	-0.9708208821051704	2.749865628777215e-4
1815	ENSRNOG00000003984	ENSRNOG00000032729	-0.9708112382617352	2.7521239412253706e-4
1816	ENSRNOG00000065998	ENSRNOG00000007980	-0.9708015383603986	2.754396493362954e-4
1817	ENSRNOG00000071212	ENSRNOG00000026067	-0.9707688677603298	2.7620589711663257e-4
1818	ENSRNOG00000063348	ENSRNOG00000029339	-0.9707668752430354	2.762526700732515e-4
1819	ENSRNOG00000019857	ENSRNOG00000059840	-0.9707662765878808	2.7626672400682395e-4
1820	ENSRNOG00000051306	ENSRNOG00000021027	-0.9707620770933769	2.7636532263008995e-4
1821	ENSRNOG00000067835	ENSRNOG00000010517	-0.9707413051533371	2.768533283634689e-4
1822	ENSRNOG00000064826	ENSRNOG00000018131	-0.970740639416311	2.768689773320343e-4
1823	MSTRG.12581	ENSRNOG00000006400	-0.9707365652168337	2.76964757871756e-4
1824	MSTRG.12581	ENSRNOG00000024839	-0.9707275790787749	2.7717608306909725e-4
1825	ENSRNOG00000067835	ENSRNOG00000027350	-0.9707134454722933	2.7750865425568705e-4
1826	ENSRNOG00000063993	ENSRNOG00000002722	-0.9707120063587547	2.775425306609236e-4
1827	ENSRNOG00000070376	ENSRNOG00000069024	-0.9707068760188143	2.7766331771261754e-4
1828	ENSRNOG00000069051	ENSRNOG00000015055	-0.9706961412170431	2.779161555386267e-4
1829	ENSRNOG00000063348	ENSRNOG00000009063	-0.9706950319764531	2.779422893932626e-4
1830	ENSRNOG00000066622	ENSRNOG00000014659	-0.9706948188116604	2.7794731175134757e-4
1831	ENSRNOG00000066622	ENSRNOG00000031665	-0.9706784581759965	2.78332944427806e-4
1832	ENSRNOG00000063579	ENSRNOG00000013463	-0.9706657956464609	2.7863162827901355e-4
1833	ENSRNOG00000063993	ENSRNOG00000015082	-0.9706469751409852	2.790759186654945e-4
1834	ENSRNOG00000070152	ENSRNOG00000017444	-0.9706404759929196	2.792294400464357e-4
1835	ENSRNOG00000066622	ENSRNOG00000019466	-0.9706298796139748	2.794798529752729e-4
1836	MSTRG.17027	ENSRNOG00000037211	-0.970613022626489	2.7987849138666476e-4
1837	ENSRNOG00000067835	ENSRNOG00000067070	-0.9706102915554595	2.799431082793902e-4
1838	ENSRNOG00000062838	ENSRNOG00000016688	-0.9706097840130696	2.7995511766398806e-4
1839	ENSRNOG00000063993	ENSRNOG00000068024	-0.9706043073097398	2.800847260129302e-4
1840	ENSRNOG00000069541	ENSRNOG00000026953	-0.9706021009862756	2.8013694961348534e-4
1841	ENSRNOG00000067235	ENSRNOG00000020705	-0.9705992936928283	2.802034065259029e-4
1842	ENSRNOG00000063209	ENSRNOG00000058249	-0.9705977709767379	2.8023945762734037e-4
1843	ENSRNOG00000063348	ENSRNOG00000014828	-0.9705813800479856	2.806276961559995e-4
1844	ENSRNOG00000064568	ENSRNOG00000009503	-0.970575842908367	2.8075892210566167e-4
1845	ENSRNOG00000063579	ENSRNOG00000020202	-0.9705568132011433	2.812101897760044e-4
1846	ENSRNOG00000066075	ENSRNOG00000011977	-0.9705477637081	2.814249393829904e-4
1847	ENSRNOG00000068224	ENSRNOG00000020013	-0.9705437125418374	2.8152110745693903e-4
1848	ENSRNOG00000063579	ENSRNOG00000001765	-0.9705419200644987	2.8156366417975143e-4
1849	ENSRNOG00000065346	ENSRNOG00000011821	-0.9705296575764718	2.818549009271365e-4
1850	ENSRNOG00000067151	ENSRNOG00000020063	-0.9705294235562747	2.818604606988906e-4
1851	ENSRNOG00000066031	ENSRNOG00000025669	-0.9705238346747315	2.819932588220553e-4
1852	MSTRG.12581	ENSRNOG00000023721	-0.9705226106600523	2.8202234775687174e-4
1853	ENSRNOG00000063209	ENSRNOG00000031789	-0.970515997098494	2.8217955114362425e-4
1854	ENSRNOG00000067105	ENSRNOG00000014025	-0.970512399724766	2.8226508206974366e-4
1855	MSTRG.4435	ENSRNOG00000023812	-0.9705036591143252	2.8247296250727416e-4
1856	ENSRNOG00000070022	ENSRNOG00000020193	-0.9704983286449547	2.8259978327316304e-4
1857	ENSRNOG00000065163	ENSRNOG00000068667	-0.9704928757596836	2.827295515546169e-4
1858	ENSRNOG00000063579	ENSRNOG00000064293	-0.9704920620388388	2.827489195991184e-4
1859	ENSRNOG00000066622	ENSRNOG00000028910	-0.9704847817203714	2.829222396130149e-4
1860	MSTRG.7821	ENSRNOG00000052549	-0.9704783580572234	2.8307521799564306e-4
1861	ENSRNOG00000065346	ENSRNOG00000008424	-0.9704581014589638	2.835579473994265e-4
1862	ENSRNOG00000065346	ENSRNOG00000009085	-0.9704521551815294	2.8369974438868795e-4
1863	ENSRNOG00000064826	ENSRNOG00000023381	-0.9704519346939335	2.8370500302310475e-4
1864	ENSRNOG00000064499	ENSRNOG00000055530	-0.9704477064019553	2.838058591014825e-4
1865	ENSRNOG00000070022	ENSRNOG00000003269	-0.9704463757597783	2.8383760288930304e-4
1866	ENSRNOG00000070930	ENSRNOG00000022335	-0.9704431899044874	2.839136132051223e-4
1867	MSTRG.9891	ENSRNOG00000036830	-0.970421205237764	2.844384684759227e-4
1868	ENSRNOG00000070022	ENSRNOG00000059947	-0.9704165053264028	2.845507475490727e-4
1869	ENSRNOG00000065786	ENSRNOG00000029749	-0.9704127157710967	2.8464129776062386e-4
1870	ENSRNOG00000063209	ENSRNOG00000016758	-0.9703764362949976	2.8550905173796437e-4
1871	ENSRNOG00000063179	ENSRNOG00000020151	-0.9703681763836425	2.857068367843052e-4
1872	ENSRNOG00000070022	ENSRNOG00000029844	-0.9703667288771203	2.8574150597493464e-4
1873	ENSRNOG00000063209	ENSRNOG00000003232	-0.9703399948499852	2.8638226186528115e-4
1874	ENSRNOG00000063870	ENSRNOG00000027593	-0.9703281471343489	2.866664986029832e-4
1875	ENSRNOG00000066622	ENSRNOG00000008226	-0.9703146127603338	2.869914049477007e-4
1876	ENSRNOG00000065376	ENSRNOG00000050834	-0.9702887224170312	2.8761353883410834e-4
1877	ENSRNOG00000064499	ENSRNOG00000022994	-0.9702852893821033	2.876960933702044e-4
1878	ENSRNOG00000067047	ENSRNOG00000002171	-0.9702734023227725	2.879820515611087e-4
1879	MSTRG.5534	ENSRNOG00000003538	-0.9702613801131844	2.8827143283982615e-4
1880	ENSRNOG00000065346	ENSRNOG00000067070	-0.9702603074061404	2.8829726189627536e-4
1881	ENSRNOG00000067835	ENSRNOG00000008226	-0.9702549436933153	2.884264321028063e-4
1882	ENSRNOG00000066031	ENSRNOG00000064059	-0.9702537824312973	2.884544024226443e-4
1883	MSTRG.15606	ENSRNOG00000066139	-0.9702491378585565	2.885662883826967e-4
1884	MSTRG.7821	ENSRNOG00000016603	-0.9702328896068327	2.889579055578295e-4
1885	MSTRG.15606	ENSRNOG00000002592	-0.9702310559497593	2.890021204018378e-4
1886	ENSRNOG00000068121	ENSRNOG00000028622	-0.9702237821134483	2.891775535451835e-4
1887	ENSRNOG00000071119	ENSRNOG00000029749	-0.9702217726275234	2.892260302520544e-4
1888	ENSRNOG00000069541	ENSRNOG00000025608	-0.9702140632224883	2.8941205627441846e-4
1889	ENSRNOG00000067835	ENSRNOG00000014765	-0.9702101962666398	2.8950539174710244e-4
1890	ENSRNOG00000067235	ENSRNOG00000018964	-0.9702031192239601	2.8967625441489453e-4
1891	ENSRNOG00000067151	ENSRNOG00000018456	-0.9701977016279881	2.898070931993679e-4
1892	ENSRNOG00000062871	ENSRNOG00000017077	-0.9701962920600261	2.898411410261481e-4
1893	ENSRNOG00000069426	ENSRNOG00000028908	-0.9701751346062527	2.9035248088216115e-4
1894	ENSRNOG00000066622	ENSRNOG00000006828	-0.9701661284464566	2.9057030720225363e-4
1895	ENSRNOG00000065376	ENSRNOG00000007369	-0.9701652927806682	2.90590523850609e-4
1896	ENSRNOG00000067151	ENSRNOG00000056651	-0.9701618264787788	2.9067439047736343e-4
1897	ENSRNOG00000063579	ENSRNOG00000004608	-0.9701561828939518	2.908109669168546e-4
1898	ENSRNOG00000065163	ENSRNOG00000030475	-0.9701522432733356	2.9090632952932793e-4
1899	ENSRNOG00000070022	ENSRNOG00000021524	-0.9701467351017599	2.9103969172505906e-4
1900	ENSRNOG00000071185	ENSRNOG00000061863	-0.9701460086179613	2.9105728384615226e-4
1901	ENSRNOG00000067701	ENSRNOG00000014850	-0.9701437494781233	2.9111199394105114e-4
1902	ENSRNOG00000069674	ENSRNOG00000065330	-0.9701330345819373	2.9137156227543315e-4
1903	ENSRNOG00000066622	ENSRNOG00000021447	-0.9701301056401493	2.914425398299336e-4
1904	ENSRNOG00000063392	ENSRNOG00000007923	-0.9701206377123591	2.9167204810853775e-4
1905	ENSRNOG00000054801	ENSRNOG00000018311	-0.970113178250964	2.91852945632165e-4
1906	ENSRNOG00000067151	ENSRNOG00000006575	-0.9701108985830593	2.919082425942854e-4
1907	ENSRNOG00000066622	ENSRNOG00000018694	-0.9701102330683683	2.919243868841903e-4
1908	ENSRNOG00000065846	ENSRNOG00000028622	-0.9701018305291347	2.921282643177925e-4
1909	ENSRNOG00000069674	ENSRNOG00000004473	-0.9700910315122875	2.923904136999944e-4
1910	ENSRNOG00000063993	ENSRNOG00000009085	-0.9700805482361171	2.9264503216830384e-4
1911	ENSRNOG00000062871	ENSRNOG00000013694	-0.9700804701423895	2.9264692940822457e-4
1912	ENSRNOG00000069611	ENSRNOG00000064007	-0.970072082256573	2.928507506223532e-4
1913	ENSRNOG00000063209	ENSRNOG00000014948	-0.9700708119018134	2.928816269340828e-4
1914	ENSRNOG00000069426	ENSRNOG00000001368	-0.97005919646316	2.931640330579022e-4
1915	ENSRNOG00000066884	ENSRNOG00000070431	-0.9700551118312364	2.932633811734142e-4
1916	ENSRNOG00000070930	ENSRNOG00000000010	-0.9700495931761751	2.933976399930316e-4
1917	ENSRNOG00000064499	ENSRNOG00000013306	-0.9700464465583318	2.934742078308794e-4
1918	ENSRNOG00000065998	ENSRNOG00000066174	-0.9700405033723509	2.9361885803225185e-4
1919	MSTRG.4435	ENSRNOG00000019741	-0.970039431344635	2.9364495444705874e-4
1920	ENSRNOG00000068121	ENSRNOG00000007301	-0.9700162384510304	2.942098777847235e-4
1921	ENSRNOG00000065346	ENSRNOG00000002474	-0.9700140242139387	2.9426384506692216e-4
1922	ENSRNOG00000067835	ENSRNOG00000064059	-0.9700104314382221	2.9435142379785617e-4
1923	MSTRG.2148	ENSRNOG00000039496	-0.9700073364225557	2.9442688138714423e-4
1924	ENSRNOG00000069161	ENSRNOG00000050360	-0.9700020559843533	2.94555646914052e-4
1925	ENSRNOG00000062871	ENSRNOG00000007830	-0.9699962023250434	2.946984297953481e-4
1926	ENSRNOG00000065163	ENSRNOG00000015461	-0.9699931148248679	2.947737569005682e-4
1927	ENSRNOG00000063579	ENSRNOG00000046204	-0.9699850191625826	2.9497132472133814e-4
1928	MSTRG.2148	ENSRNOG00000057347	-0.9699804630997071	2.950825462197937e-4
1929	ENSRNOG00000070022	ENSRNOG00000016758	-0.9699792879338955	2.951112381273102e-4
1930	ENSRNOG00000064499	ENSRNOG00000028636	-0.969977598021946	2.951525005725486e-4
1931	ENSRNOG00000070022	ENSRNOG00000032238	-0.969976610462142	2.9517661532985073e-4
1932	ENSRNOG00000054801	ENSRNOG00000027365	-0.9699622488051104	2.9552743829164285e-4
1933	MSTRG.14772	ENSRNOG00000014960	-0.9699608922470485	2.955605887628998e-4
1934	MSTRG.2148	ENSRNOG00000020652	-0.9699567499452323	2.956618286784618e-4
1935	ENSRNOG00000063209	ENSRNOG00000071023	-0.9699511546812255	2.9579861245121464e-4
1936	ENSRNOG00000063209	ENSRNOG00000012269	-0.9699499895522382	2.958271003339341e-4
1937	ENSRNOG00000067701	ENSRNOG00000005985	-0.9699460985769889	0.00029592224810004453
1938	ENSRNOG00000066622	ENSRNOG00000019244	-0.9699383524163623	2.961117226225607e-4
1939	ENSRNOG00000070376	ENSRNOG00000003104	-0.9699354286951429	2.961832568897371e-4
1940	ENSRNOG00000069051	ENSRNOG00000014712	-0.9699264497638133	2.9640300735467306e-4
1941	ENSRNOG00000065846	ENSRNOG00000018615	-0.9699233327534514	2.9647931576581854e-4
1942	ENSRNOG00000061154	ENSRNOG00000018282	-0.9699155396764041	0.00029667015140399933
1943	ENSRNOG00000068224	ENSRNOG00000004292	-0.9699131446211283	2.96728815809999e-4
1944	ENSRNOG00000069611	ENSRNOG00000053942	-0.9699077508906182	2.968609549307555e-4
1945	ENSRNOG00000069051	ENSRNOG00000030522	-0.9699040577462871	2.969514521646843e-4
1946	ENSRNOG00000063579	ENSRNOG00000014948	-0.9699004959562557	2.9703874621755944e-4
1947	ENSRNOG00000065346	ENSRNOG00000010517	-0.9698989389210163	2.9707691157487837e-4
1948	ENSRNOG00000064438	ENSRNOG00000031855	-0.9698958848078416	2.97151781112337e-4
1949	ENSRNOG00000063209	ENSRNOG00000065713	-0.969883768932573	2.9744890422511716e-4
1950	ENSRNOG00000063579	ENSRNOG00000000906	-0.9698660975295051	2.978825847304023e-4
1951	ENSRNOG00000063579	ENSRNOG00000058249	-0.9698494529118177	2.982914102016565e-4
1952	MSTRG.9597	ENSRNOG00000003468	-0.9698483452071691	2.983186295024698e-4
1953	ENSRNOG00000067921	ENSRNOG00000010390	-0.9698471523507831	2.9834794286376365e-4
1954	MSTRG.14772	ENSRNOG00000053301	-0.969842866874435	2.9845326868027655e-4
1955	MSTRG.12581	ENSRNOG00000031934	-0.9698365007259673	2.986097728010506e-4
1956	ENSRNOG00000065163	ENSRNOG00000053942	-0.9698322904291155	2.987133047036572e-4
1957	ENSRNOG00000069426	ENSRNOG00000002653	-0.9698307555797852	2.987510522136638e-4
1958	ENSRNOG00000066873	ENSRNOG00000010134	-0.9698305016960778	2.987572964079366e-4
1959	ENSRNOG00000068224	ENSRNOG00000063400	-0.969821248097326	2.9898493888724786e-4
1960	ENSRNOG00000067151	ENSRNOG00000009481	-0.9698094346911494	2.992757035800153e-4
1961	ENSRNOG00000063348	ENSRNOG00000048161	-0.9697929401306731	2.996819672609341e-4
1962	ENSRNOG00000063579	ENSRNOG00000013766	-0.9697904433464526	2.9974349202044337e-4
1963	ENSRNOG00000063209	ENSRNOG00000020193	-0.9697729341561185	3.001751575326672e-4
1964	MSTRG.15606	ENSRNOG00000065021	-0.9697658345802191	3.003502932896751e-4
1965	ENSRNOG00000066075	ENSRNOG00000053303	-0.9697389121226502	3.010149814923757e-4
1966	ENSRNOG00000063993	ENSRNOG00000070827	-0.9697386723194085	3.010209059177704e-4
1967	MSTRG.12916	ENSRNOG00000030547	-0.9697379006675457	3.010399703260447e-4
1968	MSTRG.13181	ENSRNOG00000056446	-0.9697323325845413	3.0117755650338474e-4
1969	ENSRNOG00000064568	ENSRNOG00000003669	-0.9697276322783174	3.01293729197738e-4
1970	ENSRNOG00000067151	ENSRNOG00000029339	-0.969712099205755	3.016778338980064e-4
1971	ENSRNOG00000069674	ENSRNOG00000052017	-0.9696967453425223	3.020577931063251e-4
1972	ENSRNOG00000062871	ENSRNOG00000010633	-0.9696875545736947	3.0228537144605383e-4
1973	MSTRG.4435	ENSRNOG00000004874	-0.9696864206354722	3.023134566588759e-4
1974	ENSRNOG00000063348	ENSRNOG00000005993	-0.9696760401486441	3.0257063113126037e-4
1975	MSTRG.9597	ENSRNOG00000009855	-0.9696638327902501	3.0287323238065156e-4
1976	ENSRNOG00000065998	ENSRNOG00000008819	-0.969661948752597	3.0291995073961075e-4
1977	ENSRNOG00000065394	ENSRNOG00000023340	-0.9696437431062788	3.0337161574944815e-4
1978	ENSRNOG00000070022	ENSRNOG00000017150	-0.969638797215004	3.0349438780286064e-4
1979	ENSRNOG00000063209	ENSRNOG00000033498	-0.9696244805887403	3.0384993650356407e-4
1980	ENSRNOG00000067151	ENSRNOG00000007304	-0.9696177678118671	3.0401673136060126e-4
1981	ENSRNOG00000063348	ENSRNOG00000008934	-0.9696100674389878	3.0420813241871514e-4
1982	ENSRNOG00000064568	ENSRNOG00000013306	-0.9696081745078183	3.0425519423027403e-4
1983	ENSRNOG00000063579	ENSRNOG00000007089	-0.9696077443557235	3.042658892200567e-4
1984	ENSRNOG00000062871	ENSRNOG00000008074	-0.9695988936404087	3.0448599661214715e-4
1985	ENSRNOG00000066884	ENSRNOG00000058983	-0.9695983091517824	3.04500535522223e-4
1986	ENSRNOG00000065786	ENSRNOG00000024178	-0.9695974644727013	3.045215472907703e-4
1987	ENSRNOG00000066622	ENSRNOG00000011826	-0.9695850646948065	3.048300965211581e-4
1988	ENSRNOG00000062838	ENSRNOG00000014338	-0.9695737984867915	3.051105997466941e-4
1989	ENSRNOG00000066031	ENSRNOG00000045553	-0.969566560002477	3.05290902672839e-4
1990	ENSRNOG00000063579	ENSRNOG00000020776	-0.9695577355887672	3.05510795091557e-4
1991	ENSRNOG00000067151	ENSRNOG00000000700	-0.9695518878098087	3.0565656568048993e-4
1992	ENSRNOG00000067921	ENSRNOG00000064521	-0.9695502030764885	3.0569856956552677e-4
1993	MSTRG.15404	ENSRNOG00000019830	-0.9695325930369113	3.06137829719777e-4
1994	ENSRNOG00000065346	ENSRNOG00000010549	-0.9695300314732929	3.062017559305463e-4
1995	MSTRG.4435	ENSRNOG00000029212	-0.9695266212800743	3.0628687280165323e-4
1996	ENSRNOG00000070022	ENSRNOG00000049495	-0.9695144452365834	3.0659089609841317e-4
1997	MSTRG.7821	ENSRNOG00000014712	-0.9694771882709685	3.0752227854868863e-4
1998	ENSRNOG00000070376	ENSRNOG00000005413	-0.9694728008927409	3.076320686692391e-4
[truncated: 41,264 more rows]
