# Supplementary material for: Molecular Action of Tamoxifen in the Ovaries of Rats with Mammary Neoplasia
Source: Int J Mol Sci. 2023 Oct 30;24(21):15767. doi: 10.3390/ijms242115767 (PMC10649132; doi:10.3390/ijms242115767)
Supplement: Supplementary file 1 [file ijms-24-15767-s001.zip › supplementary/Table S11.xlsx]

## Sheet: Tab. S11
Supplementary Table S11. Target DEGs predicted to be potentially trans-regulated by DELs
No.	lncRNA	Number of target DEGs	Target DEGs	Number of negative correlated DEGs	List of negatively correlated DEGs	Number of positively correlated DEGs	List of positively correlated DEGs
1	ENSRNOG00000001277	225	Habp2, Gde1, Mctp2, Klk13, ENSRNOG00000063011, Klk8, ENSRNOG00000068605, Gdpgp1, Lipe, ENSRNOG00000067308, Ano5, Pcsk6, Nmb, B3gnt8, Ptprcap, ENSRNOG00000068667, Sorcs3, Igf2r, Fxyd7, Sox6, Soga3, ENSRNOG00000064803, Cd19, Cyb5r2, Olr155, Pnma8c, Naaladl2, Trpc4, Frem2, Abca4, Cmya5, Gstm7, Dclk2, Sycp1, Hcn1, Cspg4b, Ptx3, Trpc3, Fam126a, Bola3, Nap1l5, Tmem72, Plxna4, Lpcat3, ENSRNOG00000014312…	80	Gde1, Gdpgp1, Lipe, Nmb, B3gnt8, Igf2r, Soga3, ENSRNOG00000064803, Olr155, Cmya5, Dclk2, Fam126a, Bola3, Nap1l5, Lpcat3, Prkag2, Dysf, Dusp16, Adra2b, Stom, Cebpb, LOC120102087, Map1a, Gdf5, Slco5a1, H6pd, Ldlrad2, Tnfrsf9, Ctps1, Vipr2, Ttll8, Rangap1, Scn8a, Mtss1, Rgl3, Bsn, Pgm3, Rbp2, Klhl30, Mob4, Tmem14a, Myo1b, Rnf11l2, Grin2c, Ttyh2, Tmem104, Sec14l1, Sh3pxd2b, Trim80, Epop, Alox15, Klhd…	145	Habp2, Mctp2, Klk13, ENSRNOG00000063011, Klk8, ENSRNOG00000068605, ENSRNOG00000067308, Ano5, Pcsk6, Ptprcap, ENSRNOG00000068667, Sorcs3, Fxyd7, Sox6, Cd19, Cyb5r2, Pnma8c, Naaladl2, Trpc4, Frem2, Abca4, Gstm7, Sycp1, Hcn1, Cspg4b, Ptx3, Trpc3, Tmem72, Plxna4, ENSRNOG00000014312, Lmo3, Klf15, Lrig1, Hoxa4, Rnf208, Kcna4, Wfdc10a, Lrp1b, Phactr3, Sp5, Efcab8, ENSRNOG00000067752, Tspy26, Pou3f1, Gab…
2	ENSRNOG00000003984	479	Ttyh1, Gde1, Klk13, Gna14, Cd248, Avpi1, Asrgl1, ENSRNOG00000063011, Htatip2, Hells, Ldaf1, Klk7, Cib1, ENSRNOG00000068605, Wnt11, Gdpgp1, Lipe, ENSRNOG00000067308, Nfkbib, Tmem86a, Scube2, Ano5, Ctsd, Ap2s1, Pcsk6, Aldh3b1, Nmb, Ticrr, Alpk3, Hamp, Zfp551, Dhcr7, Gda, Chst8, Prdx5, Igf2r, Dpf1, Vnn3, Tdrd1, Vwa2, Zfp536, LOC688924, Kiaa0408L, Soga3, Folr1, Lrrc51, Nlrp5, Scgb1c1, Ostf1, Nmrk1, R…	192	Ttyh1, Klk13, Gna14, ENSRNOG00000063011, Hells, Klk7, ENSRNOG00000068605, Wnt11, ENSRNOG00000067308, Scube2, Ano5, Pcsk6, Ticrr, Alpk3, Hamp, Zfp551, Chst8, Dpf1, Tdrd1, Vwa2, Zfp536, Nlrp5, Plekha7, Nlrp4a, Plpp4, Cyb5r2, Naaladl2, Cenph, Frem2, Sema5a, Celsr2, Vcan, Fhip1a, Abca4, Arhgef28, Psrc1, Ccno, Cspg4b, Bmpr1b, Depdc1, ENSRNOG00000067229, Lrtm2, Plxna4, Lmo3, ENSRNOG00000060843, Klf15, …	287	Gde1, Cd248, Avpi1, Asrgl1, Htatip2, Ldaf1, Cib1, Gdpgp1, Lipe, Nfkbib, Tmem86a, Ctsd, Ap2s1, Aldh3b1, Nmb, Dhcr7, Gda, Prdx5, Igf2r, Vnn3, LOC688924, Kiaa0408L, Soga3, Folr1, Lrrc51, Scgb1c1, Ostf1, Nmrk1, Rln1, Adam12, Il27, LOC100910107, Prdx3, Btbd16, Slc35g1, Pgam1, Nlrp10, Tub, Olr154, Olr155, Gnat2, Vtcn1, H3c13, Vav3, Rhbg, Serf1, Anxa5, S100a4, Sh3d19, Mocs2, Dclk2, Elapor1, Plpp1, Rbm46…
3	ENSRNOG00000019857	201	Ptgdr2, Habp2, Ptpn5, Klk13, Arntl, Med10, Apoc4, Apoe, Bnc1, Ldaf1, Kcnq1, Rin1, Klk7, Dbp, P2ry2, ENSRNOG00000067308, Ano5, Gpha2, Bnip3, Gdpd4, B3gnt8, Actn4, Prune2, Loxl4, Dhcr7, Igf2r, Pvr, Psd, Kiaa0408L, Soga3, Adam12, Tub, Lekr1, Trpc4, F2rl1, Frrs1, Cmya5, Sfrp2, Hcn1, Rbm46, Anxa9, Myo10, Dclk1, Sgms2, Fam126a, Inmt, ENSRNOG00000014312, ENSRNOG00000070827, Galntl5, Tead4, ENSRNOG000000…	116	Ptpn5, Arntl, Med10, Ldaf1, Rin1, P2ry2, Bnip3, Gdpd4, B3gnt8, Actn4, Prune2, Loxl4, Dhcr7, Igf2r, Pvr, Kiaa0408L, Soga3, Adam12, Tub, Lekr1, F2rl1, Frrs1, Cmya5, Rbm46, Myo10, Dclk1, Sgms2, Fam126a, ENSRNOG00000070827, Galntl5, Tead4, Pzp, Adamts9, Itpripl1, ENSRNOG00000028910, Vegp2, Slc25a25, Klhl41, Muc15, Snap25, Crat, Prrx2, LOC502684, Syt13, Atp6v0d2, Slco5a1, Tnc, Cpt2, Ctps1, Decr1, Nyx,…	85	Ptgdr2, Habp2, Klk13, Apoc4, Apoe, Bnc1, Kcnq1, Klk7, Dbp, ENSRNOG00000067308, Ano5, Gpha2, Psd, Trpc4, Sfrp2, Hcn1, Anxa9, Inmt, ENSRNOG00000014312, ENSRNOG00000026675, H1f8, Rnf208, Bbox1, Flrt3, Obp2a, Phactr3, Ly75, Ass1, Gata5, Tspy26, Crispld1, Gabrr2, ENSRNOG00000068796, Dab1, Mbnl3, ENSRNOG00000067691, Dio2, Tmem179, Tmcc3, Dhh, Soat2, ENSRNOG00000070877, Cd3d, Hepacam, Gpr62, Gldn, Cd3g,…
4	ENSRNOG00000051306	359	Irx2, Ttyh1, Zfp61, Ptgdr2, Mir202, Ptpn5, Klk13, Adamtsl3, Arntl, Med10, Ptpre, Asrgl1, Ube2ql1, Apoc4, Mrgpre, Ldaf1, Kcnq1, Dbp, Anpep, Cib1, Wnt11, Epm2a, Zfp541, Tmem86a, Ano5, Perp, Bnip3, Adamts17, Alpk3, ENSRNOG00000021484, Ethe1, Prune2, Loxl4, Gsto2, Dhcr7, Hif3a, Rnls, Chst8, Prdx5, Igf2r, Dpf1, Vnn3, Pvr, Slc22a6, Zfp536, Sox6, Psd, Kiaa0408L, Soga3, Folr1, Pik3ap1, Vstm1, Ostf1, Adam…	170	Irx2, Ttyh1, Zfp61, Ptgdr2, Mir202, Klk13, Adamtsl3, Ptpre, Apoc4, Mrgpre, Kcnq1, Dbp, Wnt11, Epm2a, Zfp541, Ano5, Perp, Adamts17, Alpk3, Gsto2, Hif3a, Chst8, Dpf1, Zfp536, Sox6, Psd, Fads2, Celsr2, Kcnab1, Fhip1a, Arhgef28, Cspg4b, Elovl6, Inmt, Lrtm2, Plxna4, ENSRNOG00000014312, Dpp6, ENSRNOG00000026675, Sox5, Cntn3, Rnf208, Kcna4, Ttn, Bbox1, Oip5, Sptlc3, Flrt3, Spint3, Eppin, Tox2, Sall4, Ef…	189	Ptpn5, Arntl, Med10, Asrgl1, Ube2ql1, Ldaf1, Anpep, Cib1, Tmem86a, Bnip3, ENSRNOG00000021484, Ethe1, Prune2, Loxl4, Dhcr7, Rnls, Prdx5, Igf2r, Vnn3, Pvr, Slc22a6, Kiaa0408L, Soga3, Folr1, Pik3ap1, Vstm1, Ostf1, Adam12, Atrnl1, Prdx3, Pgam1, Lekr1, Ca13, Anxa5, Frrs1, S100a4, Cmya5, Plpp1, Osmr, Rbm46, Dclk1, Sgms2, Slc16a4, Fam126a, Steap1, Sema3d, Actr3b, ENSRNOG00000070827, Adamts9, Itpripl1, E…
5	ENSRNOG00000053476	261	Gde1, Klk13, Asrgl1, Htatip2, Hells, Wnt11, Gdpgp1, Lipe, Chrna7, Nfkbib, Scube2, Ano5, Ctsd, Nlrp14, Ap2s1, Pcsk6, Aldh3b1, Nmb, Alpk3, ENSRNOG00000068667, Zfp551, Gda, Dpf1, Tdrd1, LOC688924, Lrrc51, Nlrp5, Scgb1c1, Nlrp4a, Il27, LOC120097921, LOC100910107, ENSRNOG00000064803, Btbd16, Smpd1, Olr118-ps, Slc35g1, Nlrp10, Plpp4, Cyb5r2, Olr154, Olr155, Olr157, Naaladl2, Gnat2, Frem2, Sema5a, Abca4…	110	Klk13, Hells, Wnt11, Scube2, Ano5, Nlrp14, Pcsk6, Alpk3, ENSRNOG00000068667, Zfp551, Dpf1, Tdrd1, Nlrp5, Nlrp4a, Olr118-ps, Plpp4, Cyb5r2, Naaladl2, Frem2, Sema5a, Abca4, Psrc1, Ccno, Bmpr1b, ENSRNOG00000067229, Lmo3, Sox5, ENSRNOG00000066660, Flrt3, Wfdc10a, Sall4, Phactr3, Edn3, Adal, LOC102554479, Accsl, Pou3f1, Espn, Fam151a, Frmd3, Slc26a7, Gpr143, Bex2, Bex4, Scml2, Rps6ka6, Npas3, Esr2, Sl…	151	Gde1, Asrgl1, Htatip2, Gdpgp1, Lipe, Chrna7, Nfkbib, Ctsd, Ap2s1, Aldh3b1, Nmb, Gda, LOC688924, Lrrc51, Scgb1c1, Il27, LOC120097921, LOC100910107, ENSRNOG00000064803, Btbd16, Smpd1, Slc35g1, Nlrp10, Olr154, Olr155, Olr157, Gnat2, Vav3, Serf1, Dclk2, Elapor1, Plpp1, Tpd52, RGD1559714, Tlcd4, LOC100363268, H3c13, Hsd3b3, Gask1b, ENSRNOG00000009610, Efcab12, Bola3, Gprin3, Tmem40, Smkr1, Herc3, Nap1…
6	ENSRNOG00000054311	228	Irx2, Prss23, Ptpn5, Gna14, Avpi1, Med10, Ube2ql1, Vstm2b, Rin1, Anpep, Sytl2, Zfp541, P2ry2, Gdpgp1, Aig1, Rab38, Tgfb1, Mrps12, Relt, Zkscan2, Tnfrsf22, Gsto2, Themis, Nlrp6, Chst8, Prdx5, Nkain2, Zfp536, Ahrr, Trdn, Pgam1, Magel2, Taf13, Glrx, Snx7, Kcnab1, Dhfr, Tmigd3, Sh3d19, Mocs2, ENSRNOG00000061379, Cspg4b, Ptgfr, Hspa4l, Grm8, Tspan33, Mthfd2, Lrtm2, Plxna4, Akr1b7, Sri, Tigar, Rep15, E…	145	Prss23, Ptpn5, Avpi1, Med10, Ube2ql1, Rin1, Anpep, Sytl2, P2ry2, Gdpgp1, Aig1, Rab38, Tgfb1, Mrps12, Relt, Tnfrsf22, Prdx5, Ahrr, Pgam1, Taf13, Glrx, Snx7, Dhfr, Tmigd3, Sh3d19, Mocs2, ENSRNOG00000061379, Ptgfr, Hspa4l, Tspan33, Mthfd2, Akr1b7, Sri, Tigar, Rep15, Apold1, Rheb, Pcyox1, Snx10, Edem1, Rab5if, Srp14, Slc2a6, Emc4, Ptrh1, ENSRNOG00000065655, Il1rn, Pdyn, Fkbp1a, Sdcbp2, Creb3l1, LOC68…	83	Irx2, Gna14, Vstm2b, Zfp541, Zkscan2, Gsto2, Themis, Nlrp6, Chst8, Nkain2, Zfp536, Trdn, Magel2, Kcnab1, Cspg4b, Grm8, Lrtm2, Plxna4, ENSRNOG00000067295, Nobox, Klf15, Oip5, Rad21l1, Sall4, Adal, Trim63, Tmem245, Raver2, Npr2, Cavin4, Clspn, Plxnb3, Rtl9, Rps6ka6, RGD1565862, Wnk3, Chga, Sp4, Ppara, E2f7, RGD1564409, RGD1561648, Espl1, Ascl4, ENSRNOG00000066139, LOC103690166, Cxcr6, Bard1, Zap70,…
7	ENSRNOG00000054801	74	Utf1, Pnlip, Fxyd7, Psat1, Acsm5, Cd19, Il7, Gpr88, Ca13, ENSRNOG00000062927, Lrat, Asns, Mest, Cpa2, Pclo, Dpp6, Tmem139, Lrig1, Hoxa4, Fibin, Fermt1, Emilin3, LOC120102087, Aif1l, Pamr1, LOC100125366, Nr0b1, Chrdl1, Maged2, Serpina5, Sptb, Nrbp2, Rgs22, Tnfrsf11b, Apoa1, RGD1561444, Col7a1, Acsbg1, Lsmem2, Wnt10a, Wnt6, Inha, Serpinf1, ENSRNOG00000030291, Grin2c, Havcr1, Sh3pxd2b, Pdlim4, Hsd17…	48	Utf1, Fxyd7, Acsm5, Cd19, Mest, Cpa2, Pclo, Dpp6, Lrig1, Hoxa4, Fermt1, Emilin3, Aif1l, Pamr1, LOC100125366, Nr0b1, Chrdl1, Serpina5, Sptb, Nrbp2, Rgs22, Tnfrsf11b, RGD1561444, Acsbg1, Lsmem2, Wnt10a, Wnt6, Inha, Havcr1, Hsd17b1, Capn8, Ly9, Inhbb, Mark1, Grem2, Vash2, Nphs2, Kit, Rnase1, Myh6, Phyhip, Masp1, St3gal6, Insl3, B3gnt3, Fcho1, Kcng4, Nanos3	26	Pnlip, Psat1, Il7, Gpr88, Ca13, ENSRNOG00000062927, Lrat, Asns, Tmem139, Fibin, LOC120102087, Maged2, Apoa1, Col7a1, Serpinf1, ENSRNOG00000030291, Grin2c, Sh3pxd2b, Pdlim4, Shisa4, Hsd11b1, Nefh, RGD1563601, Katnal2, Gpt2, ENSRNOG00000065867
8	ENSRNOG00000061154	235	Habp2, Gde1, Ckm, Gpr4, Cd248, Fcgbp, ENSRNOG00000063011, LOC100910848, Lrp11, Bnc1, Hells, Ldaf1, Kcnc3, Cpn1, Klk8, ENSRNOG00000068605, Lipe, Rnf225, Ctsd, Aldh3b1, Gdpd4, Tnfrsf22, Gda, Tex36, Cdkn1c, Soga3, Folr1, Lrrc51, Gng3, Scgb1a1, Nmrk1, Rln1, Slc35g1, Neurl1, Ric3, Cyb5r2, Cenph, H3c13, Rhbg, S100a8, S100a9, Sh3d19, Mocs2, Elapor1, Hsd3b2, Bnipl, Cmbl, Ppm1l, F2rl2, Pex1, Tacr1, Syn2, …	174	Gde1, Ckm, Gpr4, Cd248, Fcgbp, LOC100910848, Lrp11, Ldaf1, Kcnc3, Cpn1, Lipe, Rnf225, Ctsd, Aldh3b1, Gdpd4, Tnfrsf22, Gda, Tex36, Soga3, Folr1, Lrrc51, Scgb1a1, Nmrk1, Rln1, Slc35g1, Neurl1, Ric3, H3c13, Rhbg, S100a8, S100a9, Sh3d19, Mocs2, Elapor1, Hsd3b2, Cmbl, Ppm1l, F2rl2, Pex1, Tacr1, Syn2, A2m, Smkr1, Iqsec3, Tspan12, Prkag2, Tead4, Slc6a6, Dysf, Fgd5, Snx10, Dusp16, Sord, Adra2b, Frzb, Exd…	61	Habp2, ENSRNOG00000063011, Bnc1, Hells, Klk8, ENSRNOG00000068605, Cdkn1c, Gng3, Cyb5r2, Cenph, Bnipl, LOC500331, Klf15, ENSRNOG00000066660, Crb2, Sp5, Pou3f1, Crispld1, Kif2c, C1qtnf12, Fam151a, Gata1, Mbnl3, Slc25a53, Sox10, Amhr2, Troap, Pde1b, LOC120093684, Gpr62, Entpd3, Asic4, Epha4, Acsl6, Hist3h2ba, Wnt9a, Prss32, Top2a, Sox8, Fgf18, Ngfr, Krt15, Kmo, Kif14, Lrrn2, Lhx9, Ildr2, Gal3st1, Ol…
9	ENSRNOG00000062374	26	Olr35, Fxyd7, Lep, ENSRNOG00000066615, Tas1r1, Nt5c1a, S100g, ENSRNOG00000062500, Endou, Hmga2, LOC120093525, Aqp9, ENSRNOG00000066520, LOC691137, Itk, Slamf1, Rnase1, Plau, Gsc2, ENSRNOG00000069240, ENSRNOG00000070694, ENSRNOG00000065633, Ly6g6f, Bnip5, ENSRNOG00000065780, Npffr1	6	Lep, Nt5c1a, ENSRNOG00000062500, LOC120093525, LOC691137, ENSRNOG00000070694	20	Olr35, Fxyd7, ENSRNOG00000066615, Tas1r1, S100g, Endou, Hmga2, Aqp9, ENSRNOG00000066520, Itk, Slamf1, Rnase1, Plau, Gsc2, ENSRNOG00000069240, ENSRNOG00000065633, Ly6g6f, Bnip5, ENSRNOG00000065780, Npffr1
10	ENSRNOG00000062687	316	Irx2, Ttyh1, Gna14, Adamtsl3, Ptpre, Asrgl1, Mrgpre, Htatip2, Epm2a, Gdpgp1, Tmem86a, Smoc2, Ap2s1, Tgfb1, Nmb, Relt, Ticrr, Alpk3, ENSRNOG00000021484, Gsto2, Syt7, Fxyd5, Rnls, Chst8, Prdx5, LOC100361913, Fxyd7, Sox6, Psat1, Plekha7, Atrnl1, Prdx3, Crym, Olr118-ps, Acsm5, Fads2, Dlg2, Cd19, Il7, Foxo1, Gpr88, Ca13, Frem2, Celsr2, Kcnab1, ENSRNOG00000062927, Abca4, Arhgef28, Anxa5, Cmya5, Sycp1, …	130	Asrgl1, Htatip2, Gdpgp1, Tmem86a, Ap2s1, Tgfb1, Nmb, Relt, ENSRNOG00000021484, Fxyd5, Rnls, Prdx5, LOC100361913, Psat1, Atrnl1, Prdx3, Il7, Gpr88, Ca13, ENSRNOG00000062927, Anxa5, Cmya5, Lrat, LOC100363268, Slc16a4, Steap1, Bola3, Asns, Lpcat3, Actr3b, Tmem139, Rab5if, Fibin, Neb, Trib3, Agpat2, Ptrh1, Ntmt1, Cebpb, LOC120102087, Fkbp1a, Map1a, Slco5a1, LOC683573, Ldlrad2, Epb41l4b, Sh3gl2, Zbtb8…	186	Irx2, Ttyh1, Gna14, Adamtsl3, Ptpre, Mrgpre, Epm2a, Smoc2, Ticrr, Alpk3, Gsto2, Syt7, Chst8, Fxyd7, Sox6, Plekha7, Crym, Olr118-ps, Acsm5, Fads2, Dlg2, Cd19, Foxo1, Frem2, Celsr2, Kcnab1, Abca4, Arhgef28, Sycp1, Cspg4b, Trpc3, ENSRNOG00000067229, Grm8, Mest, Lrtm2, Plxna4, Cpa2, Pclo, Dpp6, Klf15, Lrig1, Hoxa4, Frmd5, Kcna4, Fermt1, Emilin3, Tox2, Sall4, RGD1561442, Aif1l, Adal, LOC102554479, ENS…
11	ENSRNOG00000062746	421	Zfp61, Prss23, Ptpn5, Mctp2, Klk13, Arntl, Abcc6, Med10, Ube2ql1, Apoc4, Apoc1, Apoe, Vstm2b, Rin1, Sytl2, P2ry2, Lipe, ENSRNOG00000067308, Nfkbib, Aig1, Ano5, Gpha2, Bnip3, Adamts17, Gdpd4, Trpm1, Kcnk4, B3gnt8, Zkscan2, ENSRNOG00000021484, Ucp3, Actn4, Rtn2, Adgra1, Ptprcap, ENSRNOG00000068667, Gsto2, Dhcr7, Prdx5, LOC100361913, Igf2r, Pvr, RGD1311946, Sox6, Psd, Ahrr, Sbsn, Cnnm1, Plekha7, Atr…	257	Prss23, Ptpn5, Arntl, Med10, Ube2ql1, Rin1, Sytl2, P2ry2, Lipe, Nfkbib, Aig1, Bnip3, Gdpd4, Kcnk4, B3gnt8, ENSRNOG00000021484, Ucp3, Actn4, Adgra1, Dhcr7, Prdx5, LOC100361913, Igf2r, Pvr, RGD1311946, Ahrr, Sbsn, Atrnl1, ENSRNOG00000064803, Pgam1, Nlrp10, Tub, Lekr1, S1pr1, Ca13, Cmya5, Dclk2, Hspa4l, LOC100363268, Hsd3b1, Pdk4, Asns, Hk2, Tspan33, Nap1l5, Akr1b7, Tigar, Cdk14, Lpcat3, Clec2d2, Gr…	164	Zfp61, Mctp2, Klk13, Abcc6, Apoc4, Apoc1, Apoe, Vstm2b, ENSRNOG00000067308, Ano5, Gpha2, Adamts17, Trpm1, Zkscan2, Rtn2, Ptprcap, ENSRNOG00000068667, Gsto2, Sox6, Psd, Cnnm1, Plekha7, Acsm5, Fads2, Pnma8c, Pabpc4l, Trpc4, Vcan, Kcnab1, Gstm7, Pcdh10, Sycp1, Ddit4l2, Ptx3, Plxna4, ENSRNOG00000014312, Rnf208, Kcna4, Rad21l1, Phactr3, Edn3, Ass1, Gata5, Efcab8, ENSRNOG00000067752, Tspy26, Chst1, Gab…
12	ENSRNOG00000062838	226	Ptgdr2, Gpr4, Arntl, Med10, Ube2ql1, Apoc4, Apoc1, Apoe, Carns1, Sct, Kcnq1, Rin1, Anpep, Sytl2, Zfp541, P2ry2, Rab38, Dusp5, Gdpd4, Tnfrsf22, Actn4, Prune2, Mfge8, Themis, Nphs1, Tex36, Pvr, Nkpd1, Ahrr, Sbsn, Lekr1, Itga10, Plk2, Pabpc4l, Tmem171, S1pr1, Snx7, Homer1, F2rl1, Polr3g, Bhmt, Tmigd3, Pdlim5, Frrs1, Hsd3b2, Osmr, Myo10, Hspa4l, Hsd3b5, Hk2, Tspan33, Mthfd2, Tes, Akr1b7, Sri, Tmem140…	200	Gpr4, Arntl, Med10, Ube2ql1, Carns1, Sct, Rin1, Anpep, Sytl2, P2ry2, Rab38, Dusp5, Gdpd4, Tnfrsf22, Actn4, Prune2, Mfge8, Nphs1, Tex36, Pvr, Nkpd1, Ahrr, Sbsn, Lekr1, Itga10, Plk2, Tmem171, S1pr1, Snx7, Homer1, F2rl1, Polr3g, Bhmt, Tmigd3, Pdlim5, Frrs1, Hsd3b2, Osmr, Myo10, Hspa4l, Hsd3b5, Hk2, Tspan33, Mthfd2, Tes, Akr1b7, Sri, Tmem140, Tigar, Apold1, Grin2b, Rheb, Tead4, Pzp, Pcyox1, Adamts9, …	26	Ptgdr2, Apoc4, Apoc1, Apoe, Kcnq1, Zfp541, Themis, Pabpc4l, Rnf128, ENSRNOG00000067691, Dio2, Soat2, C2cd4c, Gsta4, Ltf, Scg2, Zfp39, Slc47a2, LOC102556277, Pf4, Armh4, Nrsn1, ENSRNOG00000062467, Gnaz, Tspear, ENSRNOG00000066080
13	ENSRNOG00000062871	545	Irx2, Gde1, Gpr4, Prss23, Ptpn5, Mctp2, Gna14, Avpi1, Med10, Ube2ql1, ENSRNOG00000063011, Vstm2b, Hells, Ldaf1, Kcnc3, Cpn1, Sct, Rin1, Anpep, Sytl2, ENSRNOG00000068605, Zfp541, P2ry2, Gdpgp1, Nfkbib, Aig1, Tmem86a, Rab38, Tcirg1, Rnf225, Ctsd, Ap2s1, Gdpd4, Mrps12, Relt, Kcnk4, Zkscan2, Tnfrsf22, Actn4, Hapln3, Prune2, Mfge8, Zfp551, Dhcr7, Themis, LOC681458, Chst8, Prdx5, Ptgir, Tex36, Vnn3, Pv…	414	Gde1, Gpr4, Prss23, Ptpn5, Avpi1, Med10, Ube2ql1, Ldaf1, Kcnc3, Cpn1, Sct, Rin1, Anpep, Sytl2, P2ry2, Gdpgp1, Nfkbib, Aig1, Tmem86a, Rab38, Tcirg1, Rnf225, Ctsd, Ap2s1, Gdpd4, Mrps12, Relt, Kcnk4, Tnfrsf22, Actn4, Hapln3, Prune2, Mfge8, Dhcr7, LOC681458, Prdx5, Ptgir, Tex36, Vnn3, Pvr, Nkpd1, Ahrr, Lrrc51, Ostf1, Nmrk1, Prdx3, Smpd1, Hpx, Pgam1, Nlrp10, Tub, Taf13, Itga10, Glrx, Tuft1, S1pr1, Snx…	131	Irx2, Mctp2, Gna14, ENSRNOG00000063011, Vstm2b, Hells, ENSRNOG00000068605, Zfp541, Zkscan2, Zfp551, Themis, Chst8, Nkain2, Zfp536, Sox6, Gng3, Cyb5r2, Magel2, Pabpc4l, Cenph, Vcan, Abca4, Psrc1, Pcdh10, Cspg4b, Depdc1, RGD1563231, Lrtm2, Tmem72, Plxna4, LOC500331, Nobox, Klf15, Sox5, Oip5, Adal, Crispld1, Kif2c, Pramef20, Raver2, Npr2, Mbnl3, Slc25a53, Zcchc18, Magee2, Rps6ka6, RGD1565862, ENSRNO…
14	ENSRNOG00000063179	296	Zfp61, Mir202, Ptpn5, Mctp2, Klk13, Adamtsl3, Abcc6, Ptpre, Mrgpre, Dbp, ENSRNOG00000067308, Smoc2, Ano5, Utf1, Gpha2, Perp, Bnip3, Pcsk6, Adamts17, Trpm1, Nmb, B3gnt8, ENSRNOG00000021484, Adgra1, Ptprcap, Loxl4, Gsto2, Enpp3, Igf2r, Fxyd7, Sox6, Psd, Kiaa0408L, Atrnl1, Acsm5, Fads2, Plpp4, Pnma8c, Ca13, Trpc4, Arhgef28, Cmya5, Gstm7, Dclk2, Sycp1, Ccno, Hcn1, Lrat, Ddit4l2, Ptx3, Trpc3, Fam126a,…	176	Zfp61, Mir202, Mctp2, Klk13, Adamtsl3, Abcc6, Ptpre, Mrgpre, Dbp, ENSRNOG00000067308, Smoc2, Ano5, Utf1, Gpha2, Perp, Pcsk6, Adamts17, Trpm1, Ptprcap, Gsto2, Fxyd7, Sox6, Psd, Acsm5, Fads2, Plpp4, Pnma8c, Trpc4, Arhgef28, Gstm7, Sycp1, Ccno, Hcn1, Ddit4l2, Ptx3, Trpc3, Plxna4, ENSRNOG00000014312, Lmo3, Dpp6, Klrk1, Lrig1, Frmd5, Rnf208, Kcna4, Fermt1, Flrt3, Spint3, Wfdc10a, Ly75, Aif1l, Efcab8, …	120	Ptpn5, Bnip3, Nmb, B3gnt8, ENSRNOG00000021484, Adgra1, Loxl4, Enpp3, Igf2r, Kiaa0408L, Atrnl1, Ca13, Cmya5, Dclk2, Lrat, Fam126a, Steap1, Asns, Nap1l5, Lpcat3, Arntl2, Fibin, Agpat2, Klhl41, Ptrh1, Arl5a, Ntmt1, Cebpb, LOC120102087, Map1a, Slco5a1, Mmel1, Acot7, Ldlrad2, Frmpd1, Sh3gl2, Nt5c1a, Ctps1, Cldn2, Pgk1, Plp2, Maged2, ENSRNOG00000022738, ENSRNOG00000062500, Cgref1, Scx, Rangap1, Cthrc1,…
15	ENSRNOG00000063209	770	Gde1, Prss23, Ptpn5, Mctp2, Klk13, Gna14, Adamtsl3, Avpi1, Arntl, Med10, Ptpre, Asrgl1, Ube2ql1, ENSRNOG00000063011, Mrgpre, Htatip2, Vstm2b, Hells, Stx11, Rin1, Sytl2, Cib1, Zfp541, Gdpgp1, Lipe, ENSRNOG00000067308, Nfkbib, Aig1, Tmem86a, Scube2, Tcirg1, Ano5, Ctsd, ENSRNOG00000064437, Nlrp14, Ap2s1, Tgfb1, Bnip3, Pcsk6, Aldh3b1, Adamts17, Gdpd4, Trpm1, Mrps12, Nmb, Relt, Kcnk4, Itgad, Ticrr, B3…	479	Gde1, Prss23, Ptpn5, Avpi1, Arntl, Med10, Asrgl1, Ube2ql1, Htatip2, Stx11, Rin1, Sytl2, Cib1, Gdpgp1, Lipe, Nfkbib, Aig1, Tmem86a, Tcirg1, Ctsd, ENSRNOG00000064437, Ap2s1, Tgfb1, Bnip3, Aldh3b1, Gdpd4, Mrps12, Nmb, Relt, Kcnk4, Itgad, B3gnt8, Ucp3, Tnfrsf22, Actn4, Hapln3, Dhcr7, LOC681458, Dmkn, Prdx5, LOC100361913, Igf2r, Vnn3, RGD1311946, LOC688924, Kiaa0408L, Lrrc51, Ostf1, Nmrk1, Adam12, Il2…	291	Mctp2, Klk13, Gna14, Adamtsl3, Ptpre, ENSRNOG00000063011, Mrgpre, Vstm2b, Hells, Zfp541, ENSRNOG00000067308, Scube2, Ano5, Nlrp14, Pcsk6, Adamts17, Trpm1, Ticrr, Alpk3, Zkscan2, Rtn2, ENSRNOG00000068667, Gsto2, Zfp551, Chst8, Zp1, Dpf1, Tdrd1, Zfp536, Sox6, Psd, Nlrp5, Cnnm1, Plekha7, Nlrp4a, Olr118-ps, Acsm5, Fads2, Dlg2, Plpp4, Cyb5r2, Pnma8c, Naaladl2, Pabpc4l, Foxo1, Cenph, Trpc4, Sema5a, Cel…
16	ENSRNOG00000063238	272	Klk13, Adamtsl3, Abcc6, Apoe, Vstm2b, Nfkbib, Aig1, Nlrp14, Ap2s1, Adamts17, Trpm1, Nmb, Itgad, B3gnt8, Zkscan2, Ucp3, Rtn2, Ptprcap, ENSRNOG00000068667, Gsto2, Dhcr7, LOC100361913, RGD1311946, Fxyd7, Sox6, Psd, Cnnm1, Plekha7, ENSRNOG00000064803, Crym, Acsm5, Fads2, Pnma8c, Pabpc4l, Ca13, ENSRNOG00000062927, Cmya5, Gstm7, Dclk2, Pcdh10, Sycp1, Ca3, Tpd52, RGD1563667, Ddit4l2, LOC100363268, Ptx3,…	133	Nfkbib, Aig1, Ap2s1, Nmb, Itgad, B3gnt8, Ucp3, Dhcr7, LOC100361913, RGD1311946, ENSRNOG00000064803, Ca13, ENSRNOG00000062927, Cmya5, Dclk2, Ca3, Tpd52, RGD1563667, LOC100363268, Eva1a, Asns, Tspan33, Nap1l5, Lpcat3, Clec2d2, Arntl2, Rab5if, Gss, Agpat2, Sdc4, Ptrh1, Arl5a, Fam102a, Stom, Aurka, Cebpb, LOC120102087, Dhrs9, Map1a, H6pd, Mmel1, Acot7, Ldlrad2, Frmpd1, Mtap, Cdh17, Timp1, Pgk1, Plp2,…	139	Klk13, Adamtsl3, Abcc6, Apoe, Vstm2b, Nlrp14, Adamts17, Trpm1, Zkscan2, Rtn2, Ptprcap, ENSRNOG00000068667, Gsto2, Fxyd7, Sox6, Psd, Cnnm1, Plekha7, Crym, Acsm5, Fads2, Pnma8c, Pabpc4l, Gstm7, Pcdh10, Sycp1, Ddit4l2, Ptx3, Pclo, Lrig1, Kcna4, Fermt1, Rad21l1, Emilin3, Edn3, Aif1l, Adal, Gata5, Efcab8, ENSRNOG00000067752, Tspy26, Chst1, Pamr1, Gabrr2, Tas1r1, Fam131c, Pramef20, Frmd3, Tmeff1, Cavin…
17	ENSRNOG00000063348	763	Irx2, Ttyh1, Ptgdr2, Gde1, Prss23, Ptpn5, Klk13, Gna14, Adamtsl3, Avpi1, Arntl, Med10, Ptpre, Asrgl1, Ube2ql1, Apoe, Mrgpre, Htatip2, Hells, Ldaf1, Kcnq1, Stx11, Rin1, Klk7, Sytl2, Cib1, Epm2a, Zfp541, P2ry2, Gdpgp1, Nfkbib, Aig1, Tmem86a, Smoc2, Scube2, Tcirg1, Ano5, Nlrp14, Ap2s1, Tgfb1, Bnip3, Aldh3b1, Adamts17, Trpm1, Mrps12, Nmb, Relt, Itgad, Ticrr, B3gnt8, Alpk3, ENSRNOG00000021484, Ucp3, E…	467	Gde1, Prss23, Ptpn5, Avpi1, Arntl, Med10, Asrgl1, Ube2ql1, Htatip2, Ldaf1, Stx11, Rin1, Sytl2, Cib1, P2ry2, Gdpgp1, Nfkbib, Aig1, Tmem86a, Tcirg1, Ap2s1, Tgfb1, Bnip3, Aldh3b1, Mrps12, Nmb, Relt, Itgad, B3gnt8, ENSRNOG00000021484, Ucp3, Ethe1, Tnfrsf22, Actn4, Prune2, Fxyd5, Dhcr7, Rnls, Dmkn, Prdx5, LOC100361913, Tex36, Igf2r, Vnn3, Pvr, RGD1311946, LOC688924, Kiaa0408L, Lrrc51, Pik3ap1, Ostf1, …	296	Irx2, Ttyh1, Ptgdr2, Klk13, Gna14, Adamtsl3, Ptpre, Apoe, Mrgpre, Hells, Kcnq1, Klk7, Epm2a, Zfp541, Smoc2, Scube2, Ano5, Nlrp14, Adamts17, Trpm1, Ticrr, Alpk3, Rtn2, ENSRNOG00000068667, Gsto2, Zfp551, Themis, Chst8, Zp1, Dpf1, Tdrd1, Vwa2, Zfp536, ENSRNOG00000066174, Sox6, Psd, Nlrp5, Plekha7, Nlrp4a, Acsm5, Fads2, Dlg2, Plpp4, Cyb5r2, Pnma8c, Magel2, Naaladl2, Foxo1, Trpc4, Sema5a, Celsr2, Vcan…
18	ENSRNOG00000063392	476	Irx2, Ttyh1, Gde1, Prss23, Ptpn5, Klk13, Gna14, Adamtsl3, Abcc6, Med10, Ptpre, Asrgl1, Ube2ql1, Mrgpre, Htatip2, Vstm2b, Rin1, Anpep, Cib1, Epm2a, Zfp541, Gdpgp1, Nfkbib, Tmem86a, Smoc2, Ap2s1, Tgfb1, Bnip3, Nmb, Relt, Itgad, Ticrr, B3gnt8, Alpk3, Zkscan2, ENSRNOG00000021484, Ethe1, Rtn2, Gsto2, Syt7, Fxyd5, Hif3a, Themis, Rnls, Nlrp6, Chst8, Prdx5, LOC100361913, Nkain2, Fxyd7, Zfp536, ENSRNOG000…	227	Gde1, Prss23, Ptpn5, Med10, Asrgl1, Ube2ql1, Htatip2, Rin1, Anpep, Cib1, Gdpgp1, Nfkbib, Tmem86a, Ap2s1, Tgfb1, Bnip3, Nmb, Relt, Itgad, B3gnt8, ENSRNOG00000021484, Ethe1, Fxyd5, Rnls, Prdx5, LOC100361913, Pik3ap1, Ostf1, Atrnl1, Prdx3, Pgam1, Taf13, Gpr88, Ca13, ENSRNOG00000062927, Anxa5, S100a4, Cmya5, ENSRNOG00000061379, Rbm46, Tpd52, LOC100363268, Slc16a4, Steap1, Bola3, Asns, Lep, Tspan33, R…	249	Irx2, Ttyh1, Klk13, Gna14, Adamtsl3, Abcc6, Ptpre, Mrgpre, Vstm2b, Epm2a, Zfp541, Smoc2, Ticrr, Alpk3, Zkscan2, Rtn2, Gsto2, Syt7, Hif3a, Themis, Nlrp6, Chst8, Nkain2, Fxyd7, Zfp536, ENSRNOG00000066174, Sox6, Psd, Mamdc2, Plekha7, Crym, Olr118-ps, Acsm5, Fads2, Dlg2, Cd19, Pnma8c, Plppr4, Foxo1, Celsr2, Vcan, Kcnab1, Abca4, Arhgef28, Pcdh10, Sycp1, Cspg4b, Trpc3, ENSRNOG00000067229, Grm8, Mest, L…
19	ENSRNOG00000063449	91	Pnliprp2, Sct, Aig1, Mrps12, Kcnk4, LOC100911413, Hapln3, LOC681458, Dmkn, RGD1311946, Scd, Smpd1, LOC499240, Glrx, Tuft1, S1pr1, Snx7, ENSRNOG00000061379, Eva1a, Clstn3, Clec2d2, Nobox, Clec12a, Gucy2c, Mgll, Aldh1l1, Cd44, Emc4, Padi3, Casz1, RGD1566387, Atp6ap2, ENSRNOG00000064007, Togaram2, Gpx2, ENSRNOG00000064569, ENSRNOG00000065526, Nav3, LOC120093114, ENSRNOG00000068626, Sdr9c7, Dusp6, Sq…	10	Nobox, ENSRNOG00000064007, LOC120093114, Btg4, Khdc3, Nwd2, Eif4e1b, Pnpla1, Oas1d, ENSRNOG00000069483	81	Pnliprp2, Sct, Aig1, Mrps12, Kcnk4, LOC100911413, Hapln3, LOC681458, Dmkn, RGD1311946, Scd, Smpd1, LOC499240, Glrx, Tuft1, S1pr1, Snx7, ENSRNOG00000061379, Eva1a, Clstn3, Clec2d2, Clec12a, Gucy2c, Mgll, Aldh1l1, Cd44, Emc4, Padi3, Casz1, RGD1566387, Atp6ap2, Togaram2, Gpx2, ENSRNOG00000064569, ENSRNOG00000065526, Nav3, ENSRNOG00000068626, Sdr9c7, Dusp6, Sqle, Grin3b, Mpzl3, Clmp, Ubash3b, Chrnb4,…
20	ENSRNOG00000063463	177	Ckm, Gpr4, Avpi1, LOC100910848, Sytl2, Ctsd, Mrps12, Tnfrsf22, Mfge8, LOC681458, Ptgir, Tex36, Nkpd1, Gng3, Scgb1a1, Hpx, Ric3, Magel2, Glrx, Tuft1, Snx7, Cenph, Polr3g, ENSRNOG00000069130, Dhfr, S100a8, S100a9, Sh3d19, Mocs2, Hsd3b2, ENSRNOG00000061379, Ptgfr, Pex1, Iqsec3, Tspan12, Sri, LOC500331, Nobox, Kcnj8, Slc6a6, Fgd5, Pcyox1, Snx10, Gucy2c, Mgll, Aldh1l1, Sord, Rasgrp1, Lcn15l1, Bpifb2, …	20	Gng3, Magel2, Cenph, LOC500331, Nobox, Kif2c, Troap, Espl1, Scg2, Bard1, Efnb3, Top2a, Kif14, LOC102556277, Gal3st1, Olr1620, LOC102547093, Tubb2b, ENSRNOG00000062467, Pnpla1	157	Ckm, Gpr4, Avpi1, LOC100910848, Sytl2, Ctsd, Mrps12, Tnfrsf22, Mfge8, LOC681458, Ptgir, Tex36, Nkpd1, Scgb1a1, Hpx, Ric3, Glrx, Tuft1, Snx7, Polr3g, ENSRNOG00000069130, Dhfr, S100a8, S100a9, Sh3d19, Mocs2, Hsd3b2, ENSRNOG00000061379, Ptgfr, Pex1, Iqsec3, Tspan12, Sri, Kcnj8, Slc6a6, Fgd5, Pcyox1, Snx10, Gucy2c, Mgll, Aldh1l1, Sord, Rasgrp1, Lcn15l1, Bpifb2, Emc4, Nostrin, Ntng2, Bpifb6, Syt13, St…
21	ENSRNOG00000063513	352	Habp2, Gde1, Ptpn5, Mctp2, Klk13, ENSRNOG00000063011, Bnc1, Hells, Ldaf1, Kcnc3, Cpn1, Klk8, Klk7, ENSRNOG00000068605, Gdpgp1, Lipe, ENSRNOG00000067308, Ano5, Rnf225, Gpha2, Cyp2b1, Pcsk6, Gdpd4, B3gnt8, Zfp551, Sorcs3, Dhcr7, Gda, Igf2r, Dpf1, Cdkn1c, Zfp536, Sox6, Kiaa0408L, Soga3, Folr1, Lrrc51, Nlrp5, Rln1, Prdx3, Slc35g1, Pgam1, Nlrp10, Tub, Cyb5r2, Olr155, Pde4d, Pabpc4l, Trpc4, Frem2, Vcan…	186	Gde1, Ptpn5, Ldaf1, Kcnc3, Cpn1, Gdpgp1, Lipe, Rnf225, Gdpd4, B3gnt8, Dhcr7, Gda, Igf2r, Kiaa0408L, Soga3, Folr1, Lrrc51, Rln1, Prdx3, Slc35g1, Pgam1, Nlrp10, Tub, Olr155, Pde4d, H3c13, Rhbg, Sh3d19, Cmya5, Dclk2, Plpp1, Rbm46, Ppm1l, Fam126a, Bola3, Pex1, Pdk4, A2m, Herc3, Nap1l5, ENSRNOG00000070827, Galntl5, Prkag2, Tead4, Slc6a6, Pzp, Dysf, Dusp16, Edem1, ENSRNOG00000028910, Adra2b, Lpin3, Cra…	166	Habp2, Mctp2, Klk13, ENSRNOG00000063011, Bnc1, Hells, Klk8, Klk7, ENSRNOG00000068605, ENSRNOG00000067308, Ano5, Gpha2, Cyp2b1, Pcsk6, Zfp551, Sorcs3, Dpf1, Cdkn1c, Zfp536, Sox6, Nlrp5, Cyb5r2, Pabpc4l, Trpc4, Frem2, Vcan, Psrc1, Gstm7, Pcdh10, Sycp1, Hcn1, Bnipl, Cspg4b, Trpc3, Ctnna2, Plxna4, ENSRNOG00000014312, Lmo3, Klf15, ENSRNOG00000066660, Rnf208, Kcna4, Flrt3, Ptgds, Obp2a, Wfdc10a, Lrp1b,…
22	ENSRNOG00000063556	265	Mctp2, Klk13, Vstm2b, Lipe, ENSRNOG00000067308, Nfkbib, Aig1, Ano5, Nlrp14, Ap2s1, Adamts17, Trpm1, Nmb, Kcnk4, Itgad, B3gnt8, Zkscan2, Ptprcap, ENSRNOG00000068667, Gsto2, Dhcr7, LOC100361913, RGD1311946, Cnnm1, Plekha7, LOC120097921, ENSRNOG00000064803, Smpd1, Acsm5, Nlrp10, Olr155, Pnma8c, Naaladl2, Pabpc4l, Trpc4, Abca4, Psrc1, Cmya5, Gstm7, Dclk2, Pcdh10, Sycp1, Ca3, Tpd52, RGD1563667, Ddit4l…	150	Lipe, Nfkbib, Aig1, Ap2s1, Nmb, Kcnk4, Itgad, B3gnt8, Dhcr7, LOC100361913, RGD1311946, LOC120097921, ENSRNOG00000064803, Smpd1, Nlrp10, Olr155, Cmya5, Dclk2, Ca3, Tpd52, RGD1563667, LOC100363268, Hsd3b1, Bola3, Eva1a, Pdk4, Tspan33, Nap1l5, Lpcat3, Clstn3, Clec2d2, Arntl2, Gucy2c, Edem1, Rab5if, Gss, Arl5a, Fam102a, Stom, Cebpb, LOC120102087, Dhrs9, Map1a, H6pd, Mmel1, Padi3, Acot7, Ldlrad2, Tnfr…	115	Mctp2, Klk13, Vstm2b, ENSRNOG00000067308, Ano5, Nlrp14, Adamts17, Trpm1, Zkscan2, Ptprcap, ENSRNOG00000068667, Gsto2, Cnnm1, Plekha7, Acsm5, Pnma8c, Naaladl2, Pabpc4l, Trpc4, Abca4, Psrc1, Gstm7, Pcdh10, Sycp1, Ddit4l2, Ptx3, Kcna4, Emilin3, Wfdc10a, Lrp1b, Phactr3, Edn3, Adal, Gata5, Efcab8, ENSRNOG00000067752, Tspy26, Gabrr2, Fam131c, Pramef20, Frmd3, Tmeff1, Gpr143, Atp2b3, Nr0b1, Mid1ip1, Bex…
23	ENSRNOG00000063579	780	Irx2, Ttyh1, Ptgdr2, Gde1, Prss23, Ptpn5, Klk13, Gna14, Adamtsl3, Cd248, Avpi1, Arntl, Med10, Ptpre, Asrgl1, Ube2ql1, Mrgpre, Htatip2, Hells, Ldaf1, Kcnq1, Stx11, Rin1, Klk7, Anpep, Sytl2, Cib1, Wnt11, Epm2a, Zfp541, P2ry2, Gdpgp1, ENSRNOG00000067308, Nfkbib, Tmem86a, Smoc2, Scube2, Tcirg1, Ano5, Ap2s1, Tgfb1, Bnip3, Pcsk6, Aldh3b1, Adamts17, Trpm1, Mrps12, Nmb, Relt, Ticrr, B3gnt8, Alpk3, ENSRNO…	462	Gde1, Prss23, Ptpn5, Cd248, Avpi1, Arntl, Med10, Asrgl1, Ube2ql1, Htatip2, Ldaf1, Stx11, Rin1, Anpep, Sytl2, Cib1, P2ry2, Gdpgp1, Nfkbib, Tmem86a, Tcirg1, Ap2s1, Tgfb1, Bnip3, Aldh3b1, Mrps12, Nmb, Relt, B3gnt8, ENSRNOG00000021484, Ucp3, Ethe1, Tnfrsf22, Actn4, Prune2, Loxl4, Fxyd5, Dhcr7, Rnls, Prdx5, LOC100361913, Igf2r, Vnn3, Pvr, LOC688924, Kiaa0408L, Soga3, Folr1, Lrrc51, Pik3ap1, Ostf1, Nmr…	318	Irx2, Ttyh1, Ptgdr2, Klk13, Gna14, Adamtsl3, Ptpre, Mrgpre, Hells, Kcnq1, Klk7, Wnt11, Epm2a, Zfp541, ENSRNOG00000067308, Smoc2, Scube2, Ano5, Pcsk6, Adamts17, Trpm1, Ticrr, Alpk3, Rtn2, Gsto2, Zfp551, Hif3a, Themis, Chst8, Zp1, Dpf1, Tdrd1, Vwa2, Zfp536, ENSRNOG00000066174, Sox6, Psd, Nlrp5, Plekha7, Nlrp4a, Fads2, Dlg2, Plpp4, Cyb5r2, Pnma8c, Magel2, Naaladl2, Foxo1, Cenph, Trpc4, Sema5a, Celsr…
24	ENSRNOG00000063594	315	Prss23, Avpi1, Med10, Ube2ql1, Vstm2b, Rin1, Sytl2, Zfp541, Gdpgp1, Nfkbib, Aig1, Tcirg1, Ctsd, Ap2s1, Tgfb1, Mrps12, Relt, Itgad, Ticrr, Zkscan2, Ucp3, Tnfrsf22, Actn4, Hapln3, Themis, Zp1, Dmkn, Prdx5, RGD1311946, Zfp536, ENSRNOG00000066174, Scd, Smpd1, Olr118-ps, Hpx, Pgam1, Magel2, Plppr4, Taf13, Glrx, Tuft1, Snx7, Vcan, Kcnab1, Dhfr, Bhmt, Sh3d19, Mocs2, Pcdh10, ENSRNOG00000061379, Tpd52, Pt…	97	Vstm2b, Zfp541, Ticrr, Zkscan2, Themis, Zp1, Zfp536, ENSRNOG00000066174, Olr118-ps, Magel2, Plppr4, Vcan, Kcnab1, Pcdh10, Depdc1, Gpr37, ENSRNOG00000067295, Nobox, Sox5, Oip5, Rad21l1, Bmp2, Adal, LOC102554479, ENSRNOG00000063189, Zfp385b, Jph1, Kif2c, Trim63, Pramef20, Tmem245, Raver2, Npr2, Clspn, Rps6ka6, RGD1565862, Wnk3, ENSRNOG00000064007, Ptchd1, Npas3, Chga, Sp4, E2f7, RGD1564409, LOC1200…	218	Prss23, Avpi1, Med10, Ube2ql1, Rin1, Sytl2, Gdpgp1, Nfkbib, Aig1, Tcirg1, Ctsd, Ap2s1, Tgfb1, Mrps12, Relt, Itgad, Ucp3, Tnfrsf22, Actn4, Hapln3, Dmkn, Prdx5, RGD1311946, Scd, Smpd1, Hpx, Pgam1, Taf13, Glrx, Tuft1, Snx7, Dhfr, Bhmt, Sh3d19, Mocs2, ENSRNOG00000061379, Tpd52, Ptgfr, LOC100363268, Hsd3b1, Tspan33, Il23r, Gadd45a, Tspan12, Akr1b7, Sri, Cdk14, Rep15, Clec2d2, Rheb, Bcat1, Kcnj8, Clec1…
25	ENSRNOG00000063634	569	Irx2, Ptgdr2, Habp2, Gde1, Ptpn5, Mctp2, Klk13, Cd248, Avpi1, Arntl, Med10, Ube2ql1, ENSRNOG00000063011, Apoc4, Apoe, Bnc1, Hells, Ldaf1, Cpn1, Kcnq1, Rin1, Klk8, Klk7, Anpep, Sytl2, ENSRNOG00000068605, Zfp541, P2ry2, Gdpgp1, Lipe, ENSRNOG00000067308, Nfkbib, Tmem86a, Ano5, Rnf225, Gpha2, Bnip3, Pcsk6, Aldh3b1, Gdpd4, Mrps12, B3gnt8, ENSRNOG00000021484, Ethe1, Tnfrsf22, Actn4, Prune2, Loxl4, Zfp5…	367	Gde1, Ptpn5, Cd248, Avpi1, Arntl, Med10, Ube2ql1, Ldaf1, Cpn1, Rin1, Anpep, Sytl2, P2ry2, Gdpgp1, Lipe, Nfkbib, Tmem86a, Rnf225, Bnip3, Aldh3b1, Gdpd4, Mrps12, B3gnt8, ENSRNOG00000021484, Ethe1, Tnfrsf22, Actn4, Prune2, Loxl4, Dhcr7, Gda, Prdx5, Tex36, Igf2r, Vnn3, Pvr, Kiaa0408L, Soga3, Folr1, Ahrr, Pik3ap1, Ostf1, Nmrk1, Rln1, Adam12, Atrnl1, Prdx3, Pgam1, Nlrp10, Tub, Lekr1, H3c13, Rhbg, Frrs1…	202	Irx2, Ptgdr2, Habp2, Mctp2, Klk13, ENSRNOG00000063011, Apoc4, Apoe, Bnc1, Hells, Kcnq1, Klk8, Klk7, ENSRNOG00000068605, Zfp541, ENSRNOG00000067308, Ano5, Gpha2, Pcsk6, Zfp551, Themis, Chst8, Dpf1, Cdkn1c, Nkain2, Zfp536, Sox6, Psd, Nlrp5, Gng3, Fads2, Cyb5r2, Pabpc4l, Cenph, Trpc4, Vcan, Arhgef28, Psrc1, Pcdh10, Sycp1, Bnipl, Cspg4b, Depdc1, Trpc3, Inmt, Lrtm2, Plxna4, ENSRNOG00000014312, Klf15, …
26	ENSRNOG00000063706	349	Ckm, Gpr4, Avpi1, ENSRNOG00000063011, Pnliprp2, Hells, Sytl2, ENSRNOG00000068605, Ctsd, ENSRNOG00000064437, Aldh3b1, Gdpd4, Mrps12, Kcnk4, LOC100911413, Tnfrsf22, Doc2a, Hapln3, Mfge8, Zfp551, LOC681458, Gda, Ptgir, Tex36, Nkpd1, Cdkn1c, Lrrc51, Gng3, Scgb1a1, Nmrk1, Rln1, Smpd1, Hpx, Slc35g1, Nlrp10, Tub, Ric3, Pde4d, Pabpc4l, Tuft1, S1pr1, Snx7, Cenph, Vcan, Polr3g, ENSRNOG00000069130, Dhfr, Rh…	58	ENSRNOG00000063011, Hells, ENSRNOG00000068605, Zfp551, Cdkn1c, Gng3, Pabpc4l, Cenph, Vcan, Psrc1, Depdc1, LOC500331, Sp5, Pou3f1, Kif2c, Fam151a, Mbnl3, Bex1, Magee2, Rps6ka6, ENSRNOG00000064007, Npas3, Sox10, LOC120093114, Amhr2, Troap, Pde1b, ENSRNOG00000066139, LOC120093684, Btg4, Gpr62, Khdc3, ENSRNOG00000069312, Hjurp, Bard1, Hist3h2ba, Efnb3, Top2a, Tex19.1, Kif14, LOC102556277, Lrrn2, Lhx9…	291	Ckm, Gpr4, Avpi1, Pnliprp2, Sytl2, Ctsd, ENSRNOG00000064437, Aldh3b1, Gdpd4, Mrps12, Kcnk4, LOC100911413, Tnfrsf22, Doc2a, Hapln3, Mfge8, LOC681458, Gda, Ptgir, Tex36, Nkpd1, Lrrc51, Scgb1a1, Nmrk1, Rln1, Smpd1, Hpx, Slc35g1, Nlrp10, Tub, Ric3, Pde4d, Tuft1, S1pr1, Snx7, Polr3g, ENSRNOG00000069130, Dhfr, Rhbg, S100a8, S100a9, Sh3d19, Mocs2, Elapor1, Hsd3b2, ENSRNOG00000061379, ENSRNOG00000047236,…
27	ENSRNOG00000063760	104	Gna14, Vstm2b, Oca2, Zkscan2, Ptprcap, Gsto2, Nkain2, Fxyd7, Sox6, Ascl3, Ca13, Trpc3, Lep, Tmem72, Plxna4, Cpa2, Lrig1, ENSRNOG00000066615, ENSRNOG00000068013, Hoxa4, Ptrh1, ENSRNOG00000065655, LOC120102087, ENSRNOG00000067752, LOC683573, Fam131c, Tnfrsf9, Sit1, Egfl6, Slc25a53, Zcchc18, Foxp3, Map3k15, Pof1b, Sptssa, Bcl11b, Vipr2, Chadl, Gsdmd, E2f7, ENSRNOG00000066006, Endou, ENSRNOG000000641…	22	Ascl3, Ca13, Lep, Ptrh1, ENSRNOG00000065655, LOC120102087, LOC683573, Tnfrsf9, Foxp3, Vipr2, Grin2c, Epop, Alox15, Phlda3, Pcdh17, Msx2, RGD1563601, H1f1, H3c13, Spry4, RT1-T24-1, Sdsl	82	Gna14, Vstm2b, Oca2, Zkscan2, Ptprcap, Gsto2, Nkain2, Fxyd7, Sox6, Trpc3, Tmem72, Plxna4, Cpa2, Lrig1, ENSRNOG00000066615, ENSRNOG00000068013, Hoxa4, ENSRNOG00000067752, Fam131c, Sit1, Egfl6, Slc25a53, Zcchc18, Map3k15, Pof1b, Sptssa, Bcl11b, Chadl, Gsdmd, E2f7, ENSRNOG00000066006, Endou, ENSRNOG00000064198, RGD1561648, Ascl4, Mal2, RGD1565410, Cd3e, Cadm1, LOC103690166, ENSRNOG00000069423, Ky, L…
28	ENSRNOG00000063870	21	Anpep, Creb3l4, Grm8, LOC683573, Rtl9, Mov10l1, Ppara, Lyc2, Pth2r, Tcap, Mfsd4a, Ndufv3-ps1, Epha5, Mcpt1l1, ENSRNOG00000066901, Tmem191c, ENSRNOG00000061099, Cotl1, Il34, Naglt1, Sdsl	12	Anpep, LOC683573, Lyc2, Pth2r, Ndufv3-ps1, Epha5, Mcpt1l1, ENSRNOG00000061099, Cotl1, Il34, Naglt1, Sdsl	9	Creb3l4, Grm8, Rtl9, Mov10l1, Ppara, Tcap, Mfsd4a, ENSRNOG00000066901, Tmem191c
29	ENSRNOG00000063993	660	Habp2, Gde1, Prss23, Ptpn5, Mctp2, Klk13, Gna14, Cd248, Avpi1, Med10, Asrgl1, Ube2ql1, ENSRNOG00000063011, Bnc1, Mrgpre, Htatip2, Hells, Ldaf1, Stx11, Rin1, Klk8, Klk7, Cib1, ENSRNOG00000068605, Wnt11, Gdpgp1, Lipe, ENSRNOG00000067308, Nfkbib, Tmem86a, Tcirg1, Ano5, Ctsd, Nlrp14, Ap2s1, Bnip3, Pcsk6, Aldh3b1, Adamts17, Gdpd4, Trpm1, Mrps12, Nmb, B3gnt8, Alpk3, Actn4, ENSRNOG00000068667, Zfp551, D…	395	Gde1, Prss23, Ptpn5, Cd248, Avpi1, Med10, Asrgl1, Ube2ql1, Htatip2, Ldaf1, Stx11, Rin1, Cib1, Gdpgp1, Lipe, Nfkbib, Tmem86a, Tcirg1, Ctsd, Ap2s1, Bnip3, Aldh3b1, Gdpd4, Mrps12, Nmb, B3gnt8, Actn4, Dhcr7, Gda, Prdx5, LOC100361913, Igf2r, Vnn3, LOC688924, Kiaa0408L, Soga3, Lrrc51, Ostf1, Nmrk1, Adam12, Il27, Atrnl1, LOC120097921, LOC100910107, ENSRNOG00000064803, Prdx3, Smpd1, Slc35g1, Pgam1, Nlrp1…	265	Habp2, Mctp2, Klk13, Gna14, ENSRNOG00000063011, Bnc1, Mrgpre, Hells, Klk8, Klk7, ENSRNOG00000068605, Wnt11, ENSRNOG00000067308, Ano5, Nlrp14, Pcsk6, Adamts17, Trpm1, Alpk3, ENSRNOG00000068667, Zfp551, Chst8, Dpf1, Tdrd1, Zfp536, Sox6, Nlrp5, Cnnm1, Plekha7, Nlrp4a, Fads2, Plpp4, Cyb5r2, Pnma8c, Naaladl2, Pabpc4l, Trpc4, Frem2, Sema5a, Celsr2, Vcan, Kcnab1, Abca4, Arhgef28, Psrc1, Gstm7, Pcdh10, S…
30	ENSRNOG00000064277	42	Olr35, Fxyd7, Ca13, Lep, ENSRNOG00000066615, ENSRNOG00000068013, Tas1r1, Fam131c, Sit1, Nt5c1a, S100g, Map3k15, Pof1b, ENSRNOG00000062500, Endou, Hmga2, LOC120093525, Cd3e, Pgr, Aqp9, Lsmem2, ENSRNOG00000066520, LOC691137, Itk, Slamf1, Rnase1, Plau, Cd96, Gsc2, St3gal6, ENSRNOG00000069240, Adamts1, Cd226, Cdh1, ENSRNOG00000065633, Mpig6b, Ly6g6f, Bnip5, ENSRNOG00000065780, Npffr1, Sdsl, Srrm3	8	Ca13, Lep, Nt5c1a, ENSRNOG00000062500, LOC120093525, LOC691137, Adamts1, Sdsl	34	Olr35, Fxyd7, ENSRNOG00000066615, ENSRNOG00000068013, Tas1r1, Fam131c, Sit1, S100g, Map3k15, Pof1b, Endou, Hmga2, Cd3e, Pgr, Aqp9, Lsmem2, ENSRNOG00000066520, Itk, Slamf1, Rnase1, Plau, Cd96, Gsc2, St3gal6, ENSRNOG00000069240, Cd226, Cdh1, ENSRNOG00000065633, Mpig6b, Ly6g6f, Bnip5, ENSRNOG00000065780, Npffr1, Srrm3
31	ENSRNOG00000064337	411	Irx2, Ttyh1, Gde1, Dact2, Klk13, Adamtsl3, Cd248, Arntl, Ptpre, Asrgl1, Ube2ql1, Mrgpre, Htatip2, Ldaf1, Stx11, Dbp, Cib1, Wnt11, Epm2a, Zfp541, Gdpgp1, Tmem86a, Smoc2, Ano5, Perp, Bnip3, Pcsk6, Adamts17, Trpm1, Ticrr, Alpk3, Ethe1, Loxl4, Zfp551, Fxyd5, Dhcr7, Hif3a, Rnls, Chst8, Enpp3, Prdx5, Igf2r, Dpf1, Vnn3, Tdrd1, ENSRNOG00000066174, LOC688924, Kiaa0408L, Folr1, Nlrp5, Pik3ap1, Ostf1, Nmrk1…	202	Irx2, Ttyh1, Klk13, Adamtsl3, Ptpre, Mrgpre, Dbp, Wnt11, Epm2a, Zfp541, Smoc2, Ano5, Perp, Pcsk6, Adamts17, Trpm1, Ticrr, Alpk3, Zfp551, Hif3a, Chst8, Dpf1, Tdrd1, ENSRNOG00000066174, Nlrp5, Plekha7, Nlrp4a, Dlg2, Plpp4, Sema5a, Celsr2, Kcnab1, Fhip1a, Arhgef28, Ccno, Cspg4b, Bmpr1b, Elovl6, ENSRNOG00000067229, Inmt, Lrtm2, Abcb1b, Dpp6, ENSRNOG00000060843, ENSRNOG00000026675, Sox5, Cntn3, Frmd5,…	209	Gde1, Dact2, Cd248, Arntl, Asrgl1, Ube2ql1, Htatip2, Ldaf1, Stx11, Cib1, Gdpgp1, Tmem86a, Bnip3, Ethe1, Loxl4, Fxyd5, Dhcr7, Rnls, Enpp3, Prdx5, Igf2r, Vnn3, LOC688924, Kiaa0408L, Folr1, Pik3ap1, Ostf1, Nmrk1, Adam12, Atrnl1, Prdx3, Pgam1, Vtcn1, Vav3, Serf1, Anxa5, S100a4, Cmya5, Plpp1, Rbm46, Ptgfr, RGD1559714, Dclk1, Cmbl, LOC100363268, H3c13, Sgms2, Slc16a4, ENSRNOG00000009610, Fam126a, Gprin…
32	ENSRNOG00000064366	81	Mir202, ENSRNOG00000067308, Utf1, Sorcs3, Fxyd7, Cmya5, Hcn1, Lrat, Ptx3, ENSRNOG00000014312, Lmo3, Dpp6, LOC689770, Klrk1, Fibin, Wfdc10a, Ntmt1, LOC120102087, Efcab8, Tspy26, Slco5a1, LOC100125366, Fam131c, Nr0b1, Bex4, Fgf13, Dio3, Prkar2b, Six4, Sptb, Sptssa, Angptl4, Hmga2, Gpd1, Cd3e, Apoa1, Angptl8, Robo3, Gldn, Cd3g, Vegfa, Wnt10a, Wnt6, Inha, Shisa9, Skap1, Grin2c, Havcr1, Sh3pxd2b, Aldh…	21	Cmya5, Lrat, Fibin, Ntmt1, LOC120102087, Slco5a1, Angptl4, Gpd1, Apoa1, Angptl8, Vegfa, Grin2c, Sh3pxd2b, Nefh, Akr1c13, Unc5a, ENSRNOG00000047848, Adamts1, Pcdh1, Katnal2, Rn5-8s	60	Mir202, ENSRNOG00000067308, Utf1, Sorcs3, Fxyd7, Hcn1, Ptx3, ENSRNOG00000014312, Lmo3, Dpp6, LOC689770, Klrk1, Wfdc10a, Efcab8, Tspy26, LOC100125366, Fam131c, Nr0b1, Bex4, Fgf13, Dio3, Prkar2b, Six4, Sptb, Sptssa, Hmga2, Cd3e, Robo3, Gldn, Cd3g, Wnt10a, Wnt6, Inha, Shisa9, Skap1, Havcr1, Aldh3a1, Hsd17b1, Capn8, Lct, Nphs2, Kit, Rasgef1b, Ddc, Rnase1, Ebf2, Slain1, Cd96, St3gal6, Insl3, Dsc1, Kcn…
33	ENSRNOG00000064438	476	Prss23, Ptpn5, Klk13, Adamtsl3, Abcc6, Med10, Ptpre, Asrgl1, Apoe, Mrgpre, Vstm2b, Stx11, Rin1, Sytl2, Cib1, P2ry2, Gdpgp1, Nfkbib, Aig1, Tmem86a, Smoc2, Tcirg1, Ano5, Nlrp14, Ap2s1, Tgfb1, Bnip3, Adamts17, Trpm1, Nmb, Relt, Itgad, B3gnt8, Zkscan2, ENSRNOG00000021484, Ucp3, Ethe1, Actn4, Rtn2, Adgra1, Ptprcap, ENSRNOG00000068667, Gsto2, Fxyd5, Dhcr7, Rnls, Chst8, Zp1, Dmkn, Prdx5, LOC100361913, P…	274	Prss23, Ptpn5, Med10, Asrgl1, Stx11, Rin1, Sytl2, Cib1, P2ry2, Gdpgp1, Nfkbib, Aig1, Tmem86a, Tcirg1, Ap2s1, Tgfb1, Bnip3, Nmb, Relt, Itgad, B3gnt8, ENSRNOG00000021484, Ucp3, Ethe1, Actn4, Adgra1, Fxyd5, Dhcr7, Rnls, Dmkn, Prdx5, LOC100361913, Pvr, RGD1311946, Clcf1, Atrnl1, Scd, ENSRNOG00000064803, Smpd1, Pgam1, Nlrp10, Taf13, Ca13, ENSRNOG00000062927, Cmya5, Dclk2, ENSRNOG00000061379, Tpd52, RG…	202	Klk13, Adamtsl3, Abcc6, Ptpre, Apoe, Mrgpre, Vstm2b, Smoc2, Ano5, Nlrp14, Adamts17, Trpm1, Zkscan2, Rtn2, Ptprcap, ENSRNOG00000068667, Gsto2, Chst8, Zp1, Sox6, Psd, Plekha7, Crym, Acsm5, Fads2, Dlg2, Pnma8c, Plppr4, Foxo1, Sema5a, Kcnab1, Abca4, Arhgef28, Gstm7, Pcdh10, Sycp1, Ccno, Ddit4l2, Lrtm2, Pclo, Lrig1, Art4, Frmd5, Kcna4, Sptlc3, Fermt1, Rad21l1, Emilin3, Bmp2, Sall4, Gpat2, Edn3, Aif1l,…
34	ENSRNOG00000064499	716	Ptgdr2, Gde1, Prss23, Ptpn5, Klk13, Avpi1, Arntl, Med10, Ube2ql1, Apoe, Hells, Ldaf1, Kcnq1, Stx11, Rin1, Klk7, Sytl2, Cib1, Zfp541, P2ry2, Gdpgp1, Nfkbib, Aig1, Tmem86a, Tcirg1, Ano5, Ctsd, ENSRNOG00000064437, Nlrp14, Ap2s1, Tgfb1, Bnip3, Pcsk6, Aldh3b1, Adamts17, Gdpd4, Trpm1, Mrps12, Nmb, Relt, Kcnk4, Ticrr, B3gnt8, Alpk3, Ucp3, Ethe1, Tnfrsf22, Actn4, Rtn2, Hapln3, Prune2, ENSRNOG00000068667,…	238	Ptgdr2, Klk13, Apoe, Hells, Kcnq1, Klk7, Zfp541, Ano5, Nlrp14, Pcsk6, Adamts17, Trpm1, Ticrr, Alpk3, Rtn2, ENSRNOG00000068667, Zfp551, Chst8, Zp1, Dpf1, Tdrd1, Zfp536, ENSRNOG00000066174, Psd, Nlrp5, Cnnm1, Plekha7, Nlrp4a, Fads2, Dlg2, Cyb5r2, Pnma8c, Naaladl2, Pabpc4l, Cenph, Trpc4, Sema5a, Celsr2, Vcan, Kcnab1, Abca4, Arhgef28, Psrc1, Pcdh10, Sycp1, Ccno, Cspg4b, Bmpr1b, Ddit4l2, Depdc1, Gpr37…	478	Gde1, Prss23, Ptpn5, Avpi1, Arntl, Med10, Ube2ql1, Ldaf1, Stx11, Rin1, Sytl2, Cib1, P2ry2, Gdpgp1, Nfkbib, Aig1, Tmem86a, Tcirg1, Ctsd, ENSRNOG00000064437, Ap2s1, Tgfb1, Bnip3, Aldh3b1, Gdpd4, Mrps12, Nmb, Relt, Kcnk4, B3gnt8, Ucp3, Ethe1, Tnfrsf22, Actn4, Hapln3, Prune2, Dhcr7, Dmkn, Prdx5, LOC100361913, Tex36, Igf2r, Vnn3, Pvr, RGD1311946, LOC688924, Kiaa0408L, Lrrc51, Pik3ap1, Ostf1, Nmrk1, Ad…
35	ENSRNOG00000064548	89	Habp2, Fcgbp, Bnc1, Ldaf1, Kcnq1, Klk8, Klk7, Aldh3b1, Gdpd4, Tex36, Cdkn1c, Kiaa0408L, Soga3, Gng3, Rln1, Trpc4, H3c13, Rhbg, Bnipl, Anxa9, Ppm1l, Hsd3b5, Syn2, ENSRNOG00000070827, Galntl5, Tead4, Rnf208, Frzb, Obp2a, Muc15, Sp5, Col20a1, Pou3f1, Crispld1, Dab1, Kcnq4, Gata1, Phka1, Mbnl3, Xpnpep2, Ace2, Ttll8, Gtsf2, Pde1b, Soat2, Ephx3, LOC120093684, Gpr62, Rgl3, Rora, Kif9, Znf660, Slc6a20a, …	39	Habp2, Bnc1, Kcnq1, Klk8, Klk7, Cdkn1c, Gng3, Trpc4, Bnipl, Anxa9, Rnf208, Obp2a, Sp5, Pou3f1, Crispld1, Dab1, Gata1, Mbnl3, Gtsf2, Pde1b, Soat2, LOC120093684, Gpr62, Znf660, Slc6a20a, Wnt9a, Slc47a2, Sox8, Ltc4s, RGD1564463, Lrrn2, Kiss1, Kcnma1, Mastl, ENSRNOG00000070639, RGD1305184, Sall1, Rtkn2, Rflna	50	Fcgbp, Ldaf1, Aldh3b1, Gdpd4, Tex36, Kiaa0408L, Soga3, Rln1, H3c13, Rhbg, Ppm1l, Hsd3b5, Syn2, ENSRNOG00000070827, Galntl5, Tead4, Frzb, Muc15, Col20a1, Kcnq4, Phka1, Xpnpep2, Ace2, Ttll8, Ephx3, Rgl3, Rora, Kif9, Farp2, Mogat1, Rufy4, Pecam1, Rbfox3, Chrnb1, Adamts4, Tns3, Ogdh, Itga8, Unc5a, Hist1h2ao, ENSRNOG00000063843, Pcdh1, Rnf125, ENSRNOG00000063575, Tbc1d9, RT1-M1-4, Notch4, Elfn1, Clec4…
36	ENSRNOG00000064568	803	Irx2, Gde1, Prss23, Ptpn5, Mctp2, Klk13, Gna14, Adamtsl3, Avpi1, Arntl, Med10, Ptpre, Asrgl1, Ube2ql1, ENSRNOG00000063011, Apoe, Mrgpre, Htatip2, Vstm2b, Hells, Stx11, Rin1, Klk7, Sytl2, Cib1, Zfp541, P2ry2, Gdpgp1, Lipe, ENSRNOG00000067308, Nfkbib, Aig1, Tmem86a, Smoc2, Tcirg1, Ano5, Ctsd, Nlrp14, Ap2s1, Tgfb1, Bnip3, Pcsk6, Aldh3b1, Adamts17, Gdpd4, Trpm1, Mrps12, Nmb, Relt, Kcnk4, Itgad, Ticrr…	315	Irx2, Mctp2, Klk13, Gna14, Adamtsl3, Ptpre, ENSRNOG00000063011, Apoe, Mrgpre, Vstm2b, Hells, Klk7, Zfp541, ENSRNOG00000067308, Smoc2, Ano5, Nlrp14, Pcsk6, Adamts17, Trpm1, Ticrr, Alpk3, Zkscan2, Rtn2, Ptprcap, ENSRNOG00000068667, Gsto2, Zfp551, Chst8, Zp1, Dpf1, Tdrd1, Zfp536, Sox6, Psd, Nlrp5, Cnnm1, Plekha7, Nlrp4a, Olr118-ps, Acsm5, Fads2, Dlg2, Plpp4, Cyb5r2, Pnma8c, Naaladl2, Pabpc4l, Foxo1,…	488	Gde1, Prss23, Ptpn5, Avpi1, Arntl, Med10, Asrgl1, Ube2ql1, Htatip2, Stx11, Rin1, Sytl2, Cib1, P2ry2, Gdpgp1, Lipe, Nfkbib, Aig1, Tmem86a, Tcirg1, Ctsd, Ap2s1, Tgfb1, Bnip3, Aldh3b1, Gdpd4, Mrps12, Nmb, Relt, Kcnk4, Itgad, B3gnt8, Ucp3, Tnfrsf22, Actn4, Hapln3, Dhcr7, Dmkn, Prdx5, LOC100361913, Igf2r, Vnn3, Pvr, RGD1311946, LOC688924, Kiaa0408L, Lrrc51, Ostf1, Nmrk1, Adam12, Il27, Atrnl1, Scd, LOC…
37	ENSRNOG00000064699	539	Irx2, Ptgdr2, Habp2, Gde1, Gpr4, Prss23, Ptpn5, Mctp2, Avpi1, Arntl, Med10, Ube2ql1, ENSRNOG00000063011, Apoc1, LOC100910848, Apoe, Bnc1, Hells, Ldaf1, Kcnc3, Cpn1, Sct, Kcnq1, Rin1, Klk7, Anpep, Sytl2, ENSRNOG00000068605, Zfp541, P2ry2, Gdpgp1, Nfkbib, Tmem86a, Tcirg1, Rnf225, Ctsd, Aldh3b1, Gdpd4, Mrps12, Kcnk4, Tnfrsf22, Actn4, Prune2, Mfge8, Zfp551, Dhcr7, Themis, LOC681458, Gda, Prdx5, Ptgir…	121	Irx2, Ptgdr2, Habp2, Mctp2, ENSRNOG00000063011, Apoc1, Apoe, Bnc1, Hells, Kcnq1, Klk7, ENSRNOG00000068605, Zfp541, Zfp551, Themis, Dpf1, Cdkn1c, Nkain2, Zfp536, Gng3, Cyb5r2, Magel2, Pabpc4l, Cenph, Vcan, Psrc1, Pcdh10, Bnipl, Cspg4b, Depdc1, Plxna4, LOC500331, Klf15, Sox5, Rnf208, Oip5, Crb2, Sp5, Pou3f1, Crispld1, Kif2c, C1qtnf12, Raver2, Npr2, Mbnl3, Slc25a53, Zcchc18, Magee2, Map3k15, Rps6ka6…	418	Gde1, Gpr4, Prss23, Ptpn5, Avpi1, Arntl, Med10, Ube2ql1, LOC100910848, Ldaf1, Kcnc3, Cpn1, Sct, Rin1, Anpep, Sytl2, P2ry2, Gdpgp1, Nfkbib, Tmem86a, Tcirg1, Rnf225, Ctsd, Aldh3b1, Gdpd4, Mrps12, Kcnk4, Tnfrsf22, Actn4, Prune2, Mfge8, Dhcr7, LOC681458, Gda, Prdx5, Ptgir, Tex36, Vnn3, Pvr, Nkpd1, Kiaa0408L, Ahrr, Lrrc51, Scgb1a1, Ostf1, Nmrk1, Rln1, Prdx3, Smpd1, Hpx, Pgam1, Nlrp10, Tub, Ric3, Lekr1…
38	ENSRNOG00000064826	384	Irx2, Ttyh1, Gde1, Klk13, Gna14, Adamtsl3, Ptpre, Asrgl1, Mrgpre, Htatip2, Cib1, Wnt11, Epm2a, Gdpgp1, Tmem86a, Smoc2, Ano5, Utf1, Adamts17, Nmb, Relt, Ticrr, Alpk3, ENSRNOG00000021484, Gsto2, Syt7, Fxyd5, Hif3a, Rnls, Chst8, Enpp3, Prdx5, LOC100361913, Igf2r, Fxyd7, Sox6, Kiaa0408L, Psat1, Pik3ap1, Ostf1, Plekha7, Atrnl1, Prdx3, Acsm5, Fads2, Dlg2, Plpp4, Cd19, Il7, Foxo1, Gpr88, Ca13, Frem2, Ce…	169	Gde1, Asrgl1, Htatip2, Cib1, Gdpgp1, Tmem86a, Nmb, Relt, ENSRNOG00000021484, Fxyd5, Rnls, Enpp3, Prdx5, LOC100361913, Igf2r, Kiaa0408L, Psat1, Pik3ap1, Ostf1, Atrnl1, Prdx3, Il7, Gpr88, Ca13, ENSRNOG00000062927, Vav3, Anxa5, S100a4, Cmya5, Plpp1, Lrat, LOC100363268, H3c13, Slc16a4, Fam126a, Steap1, Bola3, Asns, Lpcat3, Tmem139, Rab5if, Fibin, Neb, Trib3, Agpat2, Ctsa, Ptrh1, Arl5a, Ntmt1, Cebpb, …	215	Irx2, Ttyh1, Klk13, Gna14, Adamtsl3, Ptpre, Mrgpre, Wnt11, Epm2a, Smoc2, Ano5, Utf1, Adamts17, Ticrr, Alpk3, Gsto2, Syt7, Hif3a, Chst8, Fxyd7, Sox6, Plekha7, Acsm5, Fads2, Dlg2, Plpp4, Cd19, Foxo1, Frem2, Celsr2, Kcnab1, Fhip1a, Abca4, Arhgef28, Sycp1, Cspg4b, Trpc3, ENSRNOG00000067229, Grm8, Mest, Lrtm2, Plxna4, Cpa2, Pclo, Abcb1b, Dpp6, Klf15, Lrig1, Hoxa4, Cntn3, ENSRNOG00000066660, Frmd5, Kcn…
39	ENSRNOG00000065163	737	Irx2, Ttyh1, Gde1, Prss23, Ptpn5, Klk13, Gna14, Adamtsl3, Avpi1, Med10, Ptpre, Asrgl1, Ube2ql1, Mrgpre, Htatip2, Vstm2b, Hells, Stx11, Rin1, Sytl2, Cib1, Wnt11, Epm2a, Zfp541, Gdpgp1, ENSRNOG00000067308, Nfkbib, Aig1, Tmem86a, Smoc2, Tcirg1, Ano5, Utf1, Nlrp14, Ap2s1, Tgfb1, Bnip3, Pcsk6, Adamts17, Trpm1, Mrps12, Nmb, Relt, Itgad, Ticrr, B3gnt8, Alpk3, Zkscan2, ENSRNOG00000021484, Ucp3, Ethe1, Ac…	336	Irx2, Ttyh1, Klk13, Gna14, Adamtsl3, Ptpre, Mrgpre, Vstm2b, Hells, Wnt11, Epm2a, Zfp541, ENSRNOG00000067308, Smoc2, Ano5, Utf1, Nlrp14, Pcsk6, Adamts17, Trpm1, Ticrr, Alpk3, Zkscan2, Rtn2, ENSRNOG00000068667, Gsto2, Zfp551, Syt7, Chst8, Zp1, Dpf1, Tdrd1, Fxyd7, Zfp536, ENSRNOG00000066174, Sox6, Psd, Nlrp5, Plekha7, Nlrp4a, Crym, Olr118-ps, Acsm5, Fads2, Dlg2, Plpp4, Cd19, Cyb5r2, Pnma8c, Naaladl2…	401	Gde1, Prss23, Ptpn5, Avpi1, Med10, Asrgl1, Ube2ql1, Htatip2, Stx11, Rin1, Sytl2, Cib1, Gdpgp1, Nfkbib, Aig1, Tmem86a, Tcirg1, Ap2s1, Tgfb1, Bnip3, Mrps12, Nmb, Relt, Itgad, B3gnt8, ENSRNOG00000021484, Ucp3, Ethe1, Actn4, Fxyd5, Dhcr7, Rnls, Dmkn, Enpp3, Prdx5, LOC100361913, Igf2r, RGD1311946, LOC688924, Kiaa0408L, Lrrc51, Pik3ap1, Ostf1, Adam12, Il27, Atrnl1, LOC120097921, LOC100910107, ENSRNOG00…
40	ENSRNOG00000065346	745	Irx2, Ttyh1, Gde1, Prss23, Ptpn5, Mctp2, Klk13, Gna14, Adamtsl3, Cd248, Avpi1, Med10, Ptpre, Asrgl1, Ube2ql1, ENSRNOG00000063011, Mrgpre, Htatip2, Hells, Ldaf1, Cpn1, Stx11, Rin1, Klk7, Anpep, Sytl2, Cib1, ENSRNOG00000068605, Wnt11, Epm2a, Zfp541, Gdpgp1, Lipe, ENSRNOG00000067308, Nfkbib, Tmem86a, Scube2, Tcirg1, Ano5, Ctsd, Ap2s1, Tgfb1, Bnip3, Pcsk6, Aldh3b1, Mrps12, Nmb, Relt, Ticrr, B3gnt8, A…	454	Gde1, Prss23, Ptpn5, Cd248, Avpi1, Med10, Asrgl1, Ube2ql1, Htatip2, Ldaf1, Cpn1, Stx11, Rin1, Anpep, Sytl2, Cib1, Gdpgp1, Lipe, Nfkbib, Tmem86a, Tcirg1, Ctsd, Ap2s1, Tgfb1, Bnip3, Aldh3b1, Mrps12, Nmb, Relt, B3gnt8, Ethe1, Tnfrsf22, Fxyd5, Dhcr7, Rnls, Gda, Prdx5, LOC100361913, Igf2r, Vnn3, LOC688924, Kiaa0408L, Soga3, Folr1, Lrrc51, Pik3ap1, Ostf1, Nmrk1, Rln1, Adam12, Atrnl1, LOC100910107, ENSR…	291	Irx2, Ttyh1, Mctp2, Klk13, Gna14, Adamtsl3, Ptpre, ENSRNOG00000063011, Mrgpre, Hells, Klk7, ENSRNOG00000068605, Wnt11, Epm2a, Zfp541, ENSRNOG00000067308, Scube2, Ano5, Pcsk6, Ticrr, Alpk3, Zkscan2, Hamp, ENSRNOG00000068667, Gsto2, Zfp551, Themis, Chst8, Dpf1, Tdrd1, Vwa2, Nkain2, Zfp536, ENSRNOG00000066174, Sox6, Nlrp5, Plekha7, Nlrp4a, Olr118-ps, Fads2, Dlg2, Cyb5r2, Pnma8c, Magel2, Naaladl2, Ce…
41	ENSRNOG00000065376	518	Irx2, Ttyh1, Zfp61, Prss23, Ptpn5, Klk13, Gna14, Adamtsl3, Abcc6, Med10, Ptpre, Asrgl1, Ube2ql1, Mrgpre, Htatip2, Vstm2b, Rin1, Cib1, Epm2a, Zfp541, Gdpgp1, Nfkbib, Tmem86a, Smoc2, Ano5, Utf1, Ap2s1, Tgfb1, Bnip3, Adamts17, Trpm1, Nmb, Relt, Itgad, Ticrr, B3gnt8, Alpk3, Zkscan2, ENSRNOG00000021484, Ucp3, Ethe1, Rtn2, Ptprcap, ENSRNOG00000068667, Gsto2, Syt7, Fxyd5, Dhcr7, Hif3a, Rnls, Nlrp6, Chst…	256	Prss23, Ptpn5, Med10, Asrgl1, Ube2ql1, Htatip2, Rin1, Cib1, Gdpgp1, Nfkbib, Tmem86a, Ap2s1, Tgfb1, Bnip3, Nmb, Relt, Itgad, B3gnt8, ENSRNOG00000021484, Ucp3, Ethe1, Fxyd5, Dhcr7, Rnls, Enpp3, Prdx5, LOC100361913, Pvr, Cadm4, Pik3ap1, Ostf1, Clcf1, Atrnl1, Prdx3, Pgam1, Taf13, Gpr88, Ca13, ENSRNOG00000062927, Anxa5, Cmya5, Dclk2, Tpd52, RGD1563667, LOC100363268, Slc16a4, Hsd3b1, Steap1, Bola3, Asn…	262	Irx2, Ttyh1, Zfp61, Klk13, Gna14, Adamtsl3, Abcc6, Ptpre, Mrgpre, Vstm2b, Epm2a, Zfp541, Smoc2, Ano5, Utf1, Adamts17, Trpm1, Ticrr, Alpk3, Zkscan2, Rtn2, Ptprcap, ENSRNOG00000068667, Gsto2, Syt7, Hif3a, Nlrp6, Chst8, Fxyd7, Zfp536, ENSRNOG00000066174, Sox6, Psd, Mamdc2, Plekha7, Crym, Acsm5, Fads2, Dlg2, Plpp4, Cd19, Pnma8c, Plppr4, Foxo1, Sema5a, Celsr2, Kcnab1, Abca4, Arhgef28, Pcdh10, Sycp1, C…
42	ENSRNOG00000065394	559	Irx2, Gde1, Gpr4, Prss23, Ptpn5, Mctp2, Klk13, Gna14, Avpi1, Med10, Asrgl1, Ube2ql1, ENSRNOG00000063011, Vstm2b, Hells, Kcnc3, Rin1, Anpep, Sytl2, ENSRNOG00000068605, Zfp541, Gdpgp1, Lipe, Nfkbib, Aig1, Tmem86a, Oca2, Tcirg1, Rnf225, Ctsd, Ap2s1, Tgfb1, Mrps12, Relt, B3gnt8, Zkscan2, Tnfrsf22, Actn4, Hapln3, ENSRNOG00000068667, Zfp551, Dhcr7, Themis, LOC681458, Gda, Chst8, Dmkn, Prdx5, LOC1003619…	176	Irx2, Mctp2, Klk13, Gna14, ENSRNOG00000063011, Vstm2b, Hells, ENSRNOG00000068605, Zfp541, Oca2, Zkscan2, ENSRNOG00000068667, Zfp551, Themis, Chst8, Dpf1, Nkain2, Zfp536, Sox6, Plekha7, Olr118-ps, Cyb5r2, Magel2, Naaladl2, Pabpc4l, Cenph, Vcan, Kcnab1, Abca4, Psrc1, Pcdh10, Cspg4b, Depdc1, Trpc3, RGD1563231, Lrtm2, Tmem72, Plxna4, LOC500331, Nobox, Klf15, Sox5, Kcna4, Oip5, Sall4, Edn3, Adal, ENSR…	383	Gde1, Gpr4, Prss23, Ptpn5, Avpi1, Med10, Asrgl1, Ube2ql1, Kcnc3, Rin1, Anpep, Sytl2, Gdpgp1, Lipe, Nfkbib, Aig1, Tmem86a, Tcirg1, Rnf225, Ctsd, Ap2s1, Tgfb1, Mrps12, Relt, B3gnt8, Tnfrsf22, Actn4, Hapln3, Dhcr7, LOC681458, Gda, Dmkn, Prdx5, LOC100361913, Vnn3, LOC688924, Lrrc51, Ostf1, Nmrk1, ENSRNOG00000064803, Prdx3, Smpd1, Hpx, Ascl3, Slc35g1, Pgam1, Nlrp10, Tub, Olr154, Olr155, Olr157, Taf13,…
43	ENSRNOG00000065697	286	Habp2, Gde1, Ptpn5, Mctp2, Fcgbp, ENSRNOG00000063011, Bnc1, Ldaf1, Kcnc3, Cpn1, Klk8, Klk7, ENSRNOG00000068605, Lipe, ENSRNOG00000067308, Rnf225, Gpha2, Cyp2b1, Pcsk6, Gdpd4, B3gnt8, Prune2, Sorcs3, Gda, Igf2r, Dpf1, Cdkn1c, Kiaa0408L, Soga3, Folr1, Lrrc51, Gng3, Rln1, Prdx3, Pgam1, Tub, Cyb5r2, Pde4d, Pabpc4l, Trpc4, Vcan, H3c13, Rhbg, Psrc1, Sh3d19, Mocs2, Plpp1, Bnipl, Cspg4b, Myo10, Ppm1l, Fa…	122	Habp2, Mctp2, ENSRNOG00000063011, Bnc1, Klk8, Klk7, ENSRNOG00000068605, ENSRNOG00000067308, Gpha2, Cyp2b1, Pcsk6, Sorcs3, Dpf1, Cdkn1c, Gng3, Cyb5r2, Pabpc4l, Trpc4, Vcan, Psrc1, Bnipl, Cspg4b, Ctnna2, Plxna4, ENSRNOG00000014312, Lmo3, Klf15, ENSRNOG00000066660, Rnf208, Obp2a, Lrp1b, Sp5, Tspy26, Pou3f1, Crispld1, Espn, C1qtnf12, Npr2, Gata1, Egfl6, Mbnl3, Slc25a53, Zcchc18, Magee2, Map3k15, ENSR…	164	Gde1, Ptpn5, Fcgbp, Ldaf1, Kcnc3, Cpn1, Lipe, Rnf225, Gdpd4, B3gnt8, Prune2, Gda, Igf2r, Kiaa0408L, Soga3, Folr1, Lrrc51, Rln1, Prdx3, Pgam1, Tub, Pde4d, H3c13, Rhbg, Sh3d19, Mocs2, Plpp1, Myo10, Ppm1l, Fam126a, Pex1, Pdk4, Syn2, A2m, ENSRNOG00000070827, Galntl5, Prkag2, Tead4, Slc6a6, Pzp, Dysf, Fgd5, Edem1, ENSRNOG00000028910, Adra2b, Frzb, Slc25a25, Crat, Stom, Prrx2, Ncs1, Col20a1, Gdf5, Syt1…
44	ENSRNOG00000065786	764	Irx2, Ptgdr2, Habp2, Gde1, Gpr4, Prss23, Ptpn5, Mctp2, Klk13, Gna14, Avpi1, Arntl, Med10, Ube2ql1, ENSRNOG00000063011, Apoc4, Apoc1, Apoe, Bnc1, Vstm2b, Hells, Ldaf1, Sct, Kcnq1, Stx11, Rin1, Klk7, Anpep, Sytl2, Cib1, ENSRNOG00000068605, Zfp541, P2ry2, Gdpgp1, Lipe, ENSRNOG00000067308, Nfkbib, Aig1, Tmem86a, Tcirg1, Ano5, Ctsd, Ap2s1, Tgfb1, Bnip3, Aldh3b1, Gdpd4, Mrps12, Relt, Kcnk4, B3gnt8, Zks…	242	Irx2, Ptgdr2, Habp2, Mctp2, Klk13, Gna14, ENSRNOG00000063011, Apoc4, Apoc1, Apoe, Bnc1, Vstm2b, Hells, Kcnq1, Klk7, ENSRNOG00000068605, Zfp541, ENSRNOG00000067308, Ano5, Zkscan2, Rtn2, ENSRNOG00000068667, Gsto2, Zfp551, Themis, Chst8, Zp1, Dpf1, Tdrd1, Zfp536, Sox6, Psd, Nlrp5, Gng3, Plekha7, Fads2, Cyb5r2, Pnma8c, Magel2, Pabpc4l, Cenph, Trpc4, Celsr2, Vcan, Kcnab1, Abca4, Arhgef28, Psrc1, Pcdh1…	522	Gde1, Gpr4, Prss23, Ptpn5, Avpi1, Arntl, Med10, Ube2ql1, Ldaf1, Sct, Stx11, Rin1, Anpep, Sytl2, Cib1, P2ry2, Gdpgp1, Lipe, Nfkbib, Aig1, Tmem86a, Tcirg1, Ctsd, Ap2s1, Tgfb1, Bnip3, Aldh3b1, Gdpd4, Mrps12, Relt, Kcnk4, B3gnt8, ENSRNOG00000021484, Ucp3, Ethe1, Tnfrsf22, Actn4, Hapln3, Prune2, Mfge8, Dhcr7, LOC681458, Dmkn, Prdx5, LOC100361913, Tex36, Igf2r, Vnn3, Pvr, RGD1311946, Nkpd1, Kiaa0408L, …
45	ENSRNOG00000065846	534	Habp2, Gde1, Ckm, Gpr4, Prss23, Ptpn5, Mctp2, Klk13, Avpi1, Med10, Ube2ql1, ENSRNOG00000063011, LOC100910848, Pnliprp2, Hells, Ldaf1, Cpn1, Kcnq1, Rin1, Klk7, Sytl2, ENSRNOG00000068605, Zfp541, Gdpgp1, Lipe, Nfkbib, Tcirg1, Ctsd, ENSRNOG00000064437, Cyp2b1, Aldh3b1, Gdpd4, Mrps12, Kcnk4, LOC100911413, Tnfrsf22, Actn4, Hapln3, Prune2, Mfge8, Zfp551, Dhcr7, LOC681458, Gda, Prdx5, Ptgir, Tex36, Dpf1…	118	Habp2, Mctp2, Klk13, ENSRNOG00000063011, Hells, Kcnq1, Klk7, ENSRNOG00000068605, Zfp541, Cyp2b1, Zfp551, Dpf1, Tdrd1, Cdkn1c, Zfp536, Nlrp5, Gng3, Cyb5r2, Naaladl2, Pabpc4l, Cenph, Trpc4, Vcan, Psrc1, Pcdh10, Bnipl, Cspg4b, Depdc1, Plxna4, LOC500331, Klf15, Sox5, H1f8, Rnf208, Oip5, Obp2a, Phactr3, Sp5, Pou3f1, Crispld1, Kif2c, C1qtnf12, Pramef20, Fam151a, Npr2, Gata1, Mbnl3, Bex1, Magee2, Rps6ka…	416	Gde1, Ckm, Gpr4, Prss23, Ptpn5, Avpi1, Med10, Ube2ql1, LOC100910848, Pnliprp2, Ldaf1, Cpn1, Rin1, Sytl2, Gdpgp1, Lipe, Nfkbib, Tcirg1, Ctsd, ENSRNOG00000064437, Aldh3b1, Gdpd4, Mrps12, Kcnk4, LOC100911413, Tnfrsf22, Actn4, Hapln3, Prune2, Mfge8, Dhcr7, LOC681458, Gda, Prdx5, Ptgir, Tex36, Vnn3, Nkpd1, Lrrc51, Scgb1a1, Ostf1, Nmrk1, Rln1, Smpd1, Hpx, Slc35g1, Pgam1, Nlrp10, Tub, Ric3, Olr154, Pde4…
46	ENSRNOG00000065998	594	Irx2, Ttyh1, Ptgdr2, Gde1, Prss23, Ptpn5, Klk13, Gna14, Adamtsl3, Avpi1, Arntl, Abcc6, Med10, Ptpre, Asrgl1, Ube2ql1, Mrgpre, Htatip2, Kcnq1, Stx11, Rin1, Dbp, Anpep, Sytl2, Cib1, Wnt11, Epm2a, Zfp541, P2ry2, Gdpgp1, Nfkbib, Tmem86a, Smoc2, Tcirg1, Ano5, Perp, Ap2s1, Tgfb1, Bnip3, Adamts17, Trpm1, Nmb, Relt, Ticrr, Alpk3, ENSRNOG00000021484, Ucp3, Ethe1, Rtn2, Adgra1, Prune2, Loxl4, Gsto2, Zfp551…	269	Irx2, Ttyh1, Ptgdr2, Klk13, Gna14, Adamtsl3, Abcc6, Ptpre, Mrgpre, Kcnq1, Dbp, Wnt11, Epm2a, Zfp541, Smoc2, Ano5, Perp, Adamts17, Trpm1, Ticrr, Alpk3, Rtn2, Gsto2, Zfp551, Hif3a, Themis, Nlrp6, Chst8, Zp1, Dpf1, Tdrd1, Zfp536, ENSRNOG00000066174, Sox6, Psd, Plekha7, Nlrp4a, Acsm5, Fads2, Dlg2, Plpp4, Magel2, Foxo1, Sema5a, Celsr2, Vcan, Kcnab1, Fhip1a, Arhgef28, Pcdh10, Ccno, Cspg4b, Bmpr1b, Elov…	325	Gde1, Prss23, Ptpn5, Avpi1, Arntl, Med10, Asrgl1, Ube2ql1, Htatip2, Stx11, Rin1, Anpep, Sytl2, Cib1, P2ry2, Gdpgp1, Nfkbib, Tmem86a, Tcirg1, Ap2s1, Tgfb1, Bnip3, Nmb, Relt, ENSRNOG00000021484, Ucp3, Ethe1, Adgra1, Prune2, Loxl4, Fxyd5, Dhcr7, Rnls, Enpp3, Prdx5, LOC100361913, Igf2r, Vnn3, Pvr, Cadm4, LOC688924, Kiaa0408L, Pik3ap1, Ostf1, Adam12, Atrnl1, Prdx3, Pgam1, Nlrp10, Lekr1, Taf13, Ca13, V…
47	ENSRNOG00000066031	467	Habp2, Gde1, Ptpn5, Mctp2, Klk13, Gna14, Cd248, Asrgl1, ENSRNOG00000063011, Bnc1, Htatip2, Hells, Ldaf1, Kcnc3, Klk8, Klk7, ENSRNOG00000068605, Wnt11, Gdpgp1, Lipe, ENSRNOG00000067308, Nfkbib, Tmem86a, Ano5, Rnf225, Ctsd, Ap2s1, Pcsk6, Aldh3b1, Nmb, B3gnt8, ENSRNOG00000068667, Zfp551, Sorcs3, Dhcr7, Gda, Chst8, Prdx5, Igf2r, Dpf1, Nkain2, Fxyd7, Zfp536, Sox6, Kiaa0408L, Soga3, Folr1, Lrrc51, Nlrp…	257	Gde1, Ptpn5, Cd248, Asrgl1, Htatip2, Ldaf1, Kcnc3, Gdpgp1, Lipe, Nfkbib, Tmem86a, Rnf225, Ctsd, Ap2s1, Aldh3b1, Nmb, B3gnt8, Dhcr7, Gda, Prdx5, Igf2r, Kiaa0408L, Soga3, Folr1, Lrrc51, Nmrk1, LOC100910107, ENSRNOG00000064803, Prdx3, Smpd1, Slc35g1, Pgam1, Nlrp10, Tub, Olr154, Olr155, Olr157, Gnat2, H3c13, Vav3, Rhbg, Cmya5, Dclk2, Plpp1, Rbm46, RGD1559714, Tlcd4, LOC100363268, H3c13, Ppm1l, Hsd3b3…	210	Habp2, Mctp2, Klk13, Gna14, ENSRNOG00000063011, Bnc1, Hells, Klk8, Klk7, ENSRNOG00000068605, Wnt11, ENSRNOG00000067308, Ano5, Pcsk6, ENSRNOG00000068667, Zfp551, Sorcs3, Chst8, Dpf1, Nkain2, Fxyd7, Zfp536, Sox6, Nlrp5, Nlrp4a, Plpp4, Cyb5r2, Pnma8c, Naaladl2, Trpc4, Frem2, Sema5a, Vcan, Abca4, Psrc1, Gstm7, Pcdh10, Sycp1, Cspg4b, Trpc3, Ctnna2, Tmem72, Plxna4, ENSRNOG00000014312, Lmo3, Klf15, Lrig…
48	ENSRNOG00000066049	14	Olr35, Hcn1, Slc4a5, LOC689770, Klrk1, ENSRNOG00000062500, LOC120093525, ENSRNOG00000066520, Slamf1, Cd96, ENSRNOG00000065633, Mpig6b, Ly6g6f, ENSRNOG00000065780	3	Slc4a5, ENSRNOG00000062500, LOC120093525	11	Olr35, Hcn1, LOC689770, Klrk1, ENSRNOG00000066520, Slamf1, Cd96, ENSRNOG00000065633, Mpig6b, Ly6g6f, ENSRNOG00000065780
49	ENSRNOG00000066075	706	Ttyh1, Gde1, Prss23, Ptpn5, Klk13, Gna14, Adamtsl3, Avpi1, Arntl, Med10, Ptpre, Asrgl1, Ube2ql1, Hells, Stx11, Rin1, Sytl2, Cib1, Zfp541, Gdpgp1, Chrna7, Nfkbib, Aig1, Tmem86a, Scube2, Tcirg1, Ano5, Ctsd, ENSRNOG00000064437, Nlrp14, Ap2s1, Tgfb1, Bnip3, Pcsk6, Aldh3b1, Trpm1, Mrps12, Nmb, Relt, Itgad, Ticrr, B3gnt8, Alpk3, Ucp3, Ethe1, Tnfrsf22, Actn4, Rtn2, Hapln3, ENSRNOG00000068667, Zfp551, Fx…	252	Ttyh1, Klk13, Gna14, Adamtsl3, Ptpre, Hells, Zfp541, Scube2, Ano5, Nlrp14, Pcsk6, Trpm1, Ticrr, Alpk3, Rtn2, ENSRNOG00000068667, Zfp551, Chst8, Zp1, Dpf1, Tdrd1, Vwa2, Zfp536, ENSRNOG00000066174, Nlrp5, Plekha7, Nlrp4a, Olr118-ps, Fads2, Dlg2, Cyb5r2, Pnma8c, Magel2, Naaladl2, Pabpc4l, Foxo1, Cenph, Trpc4, Sema5a, Celsr2, Vcan, Kcnab1, Fhip1a, Abca4, Arhgef28, Psrc1, Pcdh10, Sycp1, Ccno, Cspg4b, …	454	Gde1, Prss23, Ptpn5, Avpi1, Arntl, Med10, Asrgl1, Ube2ql1, Stx11, Rin1, Sytl2, Cib1, Gdpgp1, Chrna7, Nfkbib, Aig1, Tmem86a, Tcirg1, Ctsd, ENSRNOG00000064437, Ap2s1, Tgfb1, Bnip3, Aldh3b1, Mrps12, Nmb, Relt, Itgad, B3gnt8, Ucp3, Ethe1, Tnfrsf22, Actn4, Hapln3, Fxyd5, Dhcr7, Dmkn, Prdx5, LOC100361913, Tex36, Vnn3, RGD1311946, LOC688924, Lrrc51, Pik3ap1, Ostf1, Nmrk1, Adam12, Il27, Atrnl1, Scd, LOC1…
50	ENSRNOG00000066189	247	Ttyh1, Adamtsl3, Ptpre, Asrgl1, Mrgpre, Htatip2, Stx11, Cib1, Epm2a, Smoc2, Ap2s1, Tgfb1, Trpm1, Nmb, Relt, Itgad, Ticrr, Alpk3, Rtn2, Syt7, Fxyd5, Rnls, Chst8, Zp1, LOC100361913, ENSRNOG00000066174, LOC688924, Plekha7, Crym, Olr118-ps, Acsm5, Dlg2, Plppr4, Foxo1, Gpr88, Sema5a, Celsr2, Kcnab1, ENSRNOG00000062927, Fhip1a, Vav3, Arhgef28, Anxa5, ENSRNOG00000067100, Tpd52, Ca14, RGD1563667, Bmpr1b,…	92	Asrgl1, Htatip2, Stx11, Cib1, Ap2s1, Tgfb1, Nmb, Relt, Itgad, Fxyd5, Rnls, LOC100361913, LOC688924, Gpr88, ENSRNOG00000062927, Vav3, Anxa5, Tpd52, RGD1563667, LOC100363268, Slc16a4, Rep15, Lpcat3, Actr3b, Tmem139, Fibin, Neb, Agpat2, Sdc4, Ptrh1, Arl5a, Fam102a, Dhrs9, Psmd14, Ldlrad2, Mxra8, Zbtb8os, Ndufs5, Plp2, Maged2, Id2, Plb1, Cgref1, Snapc1, Tafa5, Tspo, Mmp19, Atp8b3, Gamt, Lactb, Rasgrf…	155	Ttyh1, Adamtsl3, Ptpre, Mrgpre, Epm2a, Smoc2, Trpm1, Ticrr, Alpk3, Rtn2, Syt7, Chst8, Zp1, ENSRNOG00000066174, Plekha7, Crym, Olr118-ps, Acsm5, Dlg2, Plppr4, Foxo1, Sema5a, Celsr2, Kcnab1, Fhip1a, Arhgef28, ENSRNOG00000067100, Ca14, Bmpr1b, ENSRNOG00000067229, Mest, Pclo, ENSRNOG00000060843, Art4, Frmd5, Fermt1, Emilin3, Bmp2, Sall4, RGD1561442, Gpat2, Edn3, Aif1l, Adal, LOC102554479, ENSRNOG0000…
51	ENSRNOG00000066588	4	Sit1, Cxcr6, Itk, Grid2ip	0	NA	4	Sit1, Cxcr6, Itk, Grid2ip
52	ENSRNOG00000066622	881	Irx2, Ttyh1, Ptgdr2, Gde1, Prss23, Ptpn5, Mctp2, Klk13, Gna14, Adamtsl3, Cd248, Avpi1, Arntl, Med10, Ptpre, Asrgl1, Ube2ql1, ENSRNOG00000063011, Apoe, Mrgpre, Vstm2b, Hells, Ldaf1, Kcnq1, Stx11, Rin1, Klk7, Anpep, Sytl2, Cib1, Epm2a, Zfp541, P2ry2, Gdpgp1, Lipe, ENSRNOG00000067308, Nfkbib, Aig1, Tmem86a, Scube2, Tcirg1, Ano5, Ctsd, Nlrp14, Ap2s1, Tgfb1, Bnip3, Pcsk6, Aldh3b1, Adamts17, Gdpd4, Trp…	545	Gde1, Prss23, Ptpn5, Cd248, Avpi1, Arntl, Med10, Asrgl1, Ube2ql1, Ldaf1, Stx11, Rin1, Anpep, Sytl2, Cib1, P2ry2, Gdpgp1, Lipe, Nfkbib, Aig1, Tmem86a, Tcirg1, Ctsd, Ap2s1, Tgfb1, Bnip3, Aldh3b1, Gdpd4, Mrps12, Nmb, Relt, Kcnk4, Itgad, B3gnt8, ENSRNOG00000021484, Ucp3, Ethe1, Tnfrsf22, Actn4, Hapln3, Prune2, Fxyd5, Dhcr7, Rnls, Gda, Dmkn, Prdx5, LOC100361913, Tex36, Igf2r, Vnn3, Pvr, RGD1311946, LO…	336	Irx2, Ttyh1, Ptgdr2, Mctp2, Klk13, Gna14, Adamtsl3, Ptpre, ENSRNOG00000063011, Apoe, Mrgpre, Vstm2b, Hells, Kcnq1, Klk7, Epm2a, Zfp541, ENSRNOG00000067308, Scube2, Ano5, Nlrp14, Pcsk6, Adamts17, Trpm1, Ticrr, Alpk3, Zkscan2, Rtn2, ENSRNOG00000068667, Gsto2, Zfp551, Themis, Chst8, Zp1, Dpf1, Tdrd1, Vwa2, Nkain2, Zfp536, ENSRNOG00000066174, Sox6, Psd, Nlrp5, Plekha7, Nlrp4a, Olr118-ps, Acsm5, Fads2…
53	ENSRNOG00000066818	266	Gde1, Cd248, Hells, Stx11, Klk7, Cib1, Wnt11, Chrna7, Tmem86a, Scube2, Pcsk6, Aldh3b1, H19, Alpk3, Zfp551, Zp1, Dpf1, Vnn3, Tdrd1, Vwa2, LOC688924, Lrrc51, Nlrp5, Ostf1, Nmrk1, Rln1, Adam12, Nlrp4a, Il27, LOC100910107, Gfra1, Nlrp10, Olr154, Gnat2, Sema5a, Vcan, Vtcn1, Dhfr, Fhip1a, Vav3, Serf1, S100a4, Psrc1, Elapor1, Plpp1, Ccno, Rbm46, Ca14, Ptgfr, RGD1559714, Dclk1, Cmbl, Tlcd4, Bmpr1b, Depdc…	160	Gde1, Cd248, Stx11, Cib1, Chrna7, Tmem86a, Aldh3b1, Vnn3, LOC688924, Lrrc51, Ostf1, Nmrk1, Rln1, Adam12, Il27, LOC100910107, Nlrp10, Olr154, Gnat2, Vtcn1, Dhfr, Vav3, Serf1, S100a4, Elapor1, Plpp1, Rbm46, Ptgfr, RGD1559714, Dclk1, Cmbl, Tlcd4, H3c13, Sgms2, Hsd3b3, Hsd3b1, Gask1b, ENSRNOG00000009610, Efcab12, Gprin3, Tmem40, Smkr1, Il23r, Gadd45a, Herc3, Tspan12, ENSRNOG00000070827, Prkag2, Bcat1…	106	Hells, Klk7, Wnt11, Scube2, Pcsk6, H19, Alpk3, Zfp551, Zp1, Dpf1, Tdrd1, Vwa2, Nlrp5, Nlrp4a, Gfra1, Sema5a, Vcan, Fhip1a, Psrc1, Ccno, Ca14, Bmpr1b, Depdc1, ENSRNOG00000060843, Sox5, Oip5, Flrt3, Duox1, Phactr3, Edn3, Accsl, Pou3f1, Zfp353, Kif2c, Espn, Oog3, Fam151a, Slc26a7, Gpr143, Pcdh11x, Bex2, Mbnl3, Bex1, Bmp15, Ezhip, Ptchd1, Npas3, Tcl1a, Chga, Plek2, Troap, Ano4, Gtsf2, Espl1, Adgrb1, …
54	ENSRNOG00000066873	175	Irx2, Ptpn5, Gna14, Avpi1, Med10, Ube2ql1, Rin1, Anpep, P2ry2, Rab38, Rnf225, ENSRNOG00000021484, Themis, Nlrp6, Pvr, Nkain2, Zfp536, Sox6, Ahrr, Mamdc2, Prdx3, Pgam1, Cyb5r2, Taf13, Tmigd3, Cspg4b, Myo10, Hspa4l, Trpc3, A2m, Hk2, Mthfd2, Plxna4, Tigar, Apold1, Klf15, ENSRNOG00000068013, Edem1, Itpripl1, ENSRNOG00000028910, Slc25a25, Slc2a6, ENSRNOG00000065655, Pdyn, ENSRNOG00000066958, Fkbp1a, S…	112	Ptpn5, Avpi1, Med10, Ube2ql1, Rin1, Anpep, P2ry2, Rab38, Rnf225, ENSRNOG00000021484, Pvr, Ahrr, Prdx3, Pgam1, Taf13, Tmigd3, Myo10, Hspa4l, A2m, Hk2, Mthfd2, Tigar, Apold1, Edem1, Itpripl1, ENSRNOG00000028910, Slc25a25, Slc2a6, ENSRNOG00000065655, Pdyn, ENSRNOG00000066958, Fkbp1a, Sdcbp2, Creb3l1, LOC683573, Extl1, Myom3, St3gal3, Tmco4, Tnfrsf9, Cptp, Iffo2, Cpt2, Fam214b, Zmpste24, Rhbdl2, Ctps…	63	Irx2, Gna14, Themis, Nlrp6, Nkain2, Zfp536, Sox6, Mamdc2, Cyb5r2, Cspg4b, Trpc3, Plxna4, Klf15, ENSRNOG00000068013, Crispld1, Npr2, Sit1, Plxnb3, Rnf128, Slc25a53, Zcchc18, Map3k15, Pof1b, Dio2, Chadl, Mov10l1, Gsdmd, ENSRNOG00000066006, RGD1561648, Soat2, Mal2, ENSRNOG00000070877, LOC300024, LOC120093684, LOC103690166, Cxcr6, Zap70, Trim58, Bricd5, Baiap3, Crb1, Mfsd4a, Fras1, Armh4, Olr1620, Sl…
55	ENSRNOG00000066884	517	Habp2, Gde1, Ptpn5, Mctp2, Klk13, Adamtsl3, Med10, Asrgl1, ENSRNOG00000063011, Mrgpre, Htatip2, Klk7, Cib1, Wnt11, Gdpgp1, Lipe, ENSRNOG00000067308, Nfkbib, Tmem86a, Smoc2, Ano5, Utf1, Gpha2, Nlrp14, Ap2s1, Bnip3, Pcsk6, Adamts17, Gdpd4, Trpm1, Nmb, B3gnt8, Ptprcap, ENSRNOG00000068667, Loxl4, Gsto2, Zfp551, Dhcr7, Prdx5, LOC100361913, Igf2r, Dpf1, Tdrd1, Fxyd7, Zfp536, Sox6, Psd, Kiaa0408L, Soga3…	247	Habp2, Mctp2, Klk13, Adamtsl3, ENSRNOG00000063011, Mrgpre, Klk7, Wnt11, ENSRNOG00000067308, Smoc2, Ano5, Utf1, Gpha2, Nlrp14, Pcsk6, Adamts17, Trpm1, Ptprcap, ENSRNOG00000068667, Gsto2, Zfp551, Dpf1, Tdrd1, Fxyd7, Zfp536, Sox6, Psd, Nlrp5, Cnnm1, Plekha7, Acsm5, Fads2, Plpp4, Cyb5r2, Pnma8c, Naaladl2, Trpc4, Frem2, Sema5a, Celsr2, Vcan, Abca4, Arhgef28, Psrc1, Gstm7, Pcdh10, Sycp1, Ccno, Hcn1, Cs…	270	Gde1, Ptpn5, Med10, Asrgl1, Htatip2, Cib1, Gdpgp1, Lipe, Nfkbib, Tmem86a, Ap2s1, Bnip3, Gdpd4, Nmb, B3gnt8, Loxl4, Dhcr7, Prdx5, LOC100361913, Igf2r, Kiaa0408L, Soga3, Lrrc51, Adam12, Il27, Atrnl1, LOC120097921, LOC100910107, ENSRNOG00000064803, Prdx3, Pgam1, Nlrp10, Tub, Olr154, Olr155, Ca13, Vav3, Cmya5, Dclk2, Plpp1, Rbm46, RGD1563667, Dclk1, LOC100363268, Ppm1l, Hsd3b3, Hsd3b1, ENSRNOG0000000…
56	ENSRNOG00000067004	197	Ttyh1, Adamtsl3, Ptpre, Asrgl1, Mrgpre, Stx11, Cib1, Epm2a, Smoc2, Tgfb1, Relt, Ticrr, Alpk3, Ethe1, Rtn2, Syt7, Fxyd5, Rnls, Chst8, Zp1, LOC100361913, ENSRNOG00000066174, Plekha7, Dlg2, Plppr4, Foxo1, Celsr2, Kcnab1, ENSRNOG00000062927, Fhip1a, Arhgef28, Anxa5, ENSRNOG00000067100, Ca14, Bmpr1b, LOC100363268, Slc16a4, ENSRNOG00000067229, Steap1, Lrtm2, Pclo, Sema3d, Rep15, Actr3b, ENSRNOG00000060…	78	Asrgl1, Stx11, Cib1, Tgfb1, Relt, Ethe1, Fxyd5, Rnls, LOC100361913, ENSRNOG00000062927, Anxa5, LOC100363268, Slc16a4, Steap1, Sema3d, Rep15, Actr3b, Neb, Agpat2, Sdc4, Fam102a, Dhrs9, Psmd14, Trpa1, Mxra8, Cdkn2b, Zbtb8os, Ndufs5, Plp2, Maged2, Id2, Cgref1, Tafa5, Prr13, Mmp19, Atp8b3, Gamt, Tlr9, Rpp25, Gpx1, ENSRNOG00000037402, Hspd1, Hspe1, Tax1bp3, Itgae, Sphk1, ENSRNOG00000030291, Nme1, Tom1…	119	Ttyh1, Adamtsl3, Ptpre, Mrgpre, Epm2a, Smoc2, Ticrr, Alpk3, Rtn2, Syt7, Chst8, Zp1, ENSRNOG00000066174, Plekha7, Dlg2, Plppr4, Foxo1, Celsr2, Kcnab1, Fhip1a, Arhgef28, ENSRNOG00000067100, Ca14, Bmpr1b, ENSRNOG00000067229, Lrtm2, Pclo, ENSRNOG00000060843, Art4, Frmd5, Sptlc3, Bmp2, RGD1561442, Gpat2, LOC102554479, ENSRNOG00000063189, Zfp385b, Pamr1, Jph1, Tmem245, Raver2, Oog3, Rasef, Aldh1b1, Mfs…
57	ENSRNOG00000067047	398	Habp2, Gde1, Ptpn5, Mctp2, Klk13, Avpi1, Med10, ENSRNOG00000063011, Apoc1, Apoe, Pnliprp2, Bnc1, Rin1, Klk7, ENSRNOG00000068605, P2ry2, Gdpgp1, Lipe, ENSRNOG00000067308, Nfkbib, Aig1, Ano5, Gpha2, Cyp2b1, Gdpd4, Mrps12, Kcnk4, B3gnt8, LOC100911413, Actn4, Hapln3, Ptprcap, ENSRNOG00000068667, Zfp551, Dhcr7, Prdx5, Igf2r, Pvr, RGD1311946, Zfp536, Sox6, Lrrc51, Cnnm1, ENSRNOG00000064803, Smpd1, Pgam…	256	Gde1, Ptpn5, Avpi1, Med10, Pnliprp2, Rin1, P2ry2, Gdpgp1, Lipe, Nfkbib, Aig1, Gdpd4, Mrps12, Kcnk4, B3gnt8, LOC100911413, Actn4, Hapln3, Dhcr7, Prdx5, Igf2r, Pvr, RGD1311946, Lrrc51, ENSRNOG00000064803, Smpd1, Pgam1, Nlrp10, Tub, Pde4d, S1pr1, Snx7, Sh3d19, Cmya5, Dclk2, Myo10, Hspa4l, ENSRNOG00000047236, Ppm1l, Hsd3b3, Hsd3b1, Fam126a, Pex1, Eva1a, Pdk4, Hk2, Tspan33, Nap1l5, Tigar, Lpcat3, Clec…	142	Habp2, Mctp2, Klk13, ENSRNOG00000063011, Apoc1, Apoe, Bnc1, Klk7, ENSRNOG00000068605, ENSRNOG00000067308, Ano5, Gpha2, Cyp2b1, Ptprcap, ENSRNOG00000068667, Zfp551, Zfp536, Sox6, Cnnm1, Cyb5r2, Pnma8c, Pabpc4l, Trpc4, Vcan, Psrc1, Gstm7, Pcdh10, Sycp1, Cspg4b, Ddit4l2, Plxna4, ENSRNOG00000014312, Lmo3, Klf15, Rnf208, Kcna4, Obp2a, Lrp1b, Phactr3, Sp5, Gata5, ENSRNOG00000067752, Tspy26, Pou3f1, Gab…
58	ENSRNOG00000067105	594	Irx2, Ttyh1, Zfp61, Gde1, Prss23, Ptpn5, Mctp2, Klk13, Gna14, Adamtsl3, Abcc6, Med10, Ptpre, Asrgl1, Ube2ql1, Mrgpre, Htatip2, Vstm2b, Rin1, Cib1, Epm2a, Gdpgp1, ENSRNOG00000067308, Nfkbib, Aig1, Tmem86a, Smoc2, Ano5, Utf1, Ap2s1, Tgfb1, Bnip3, Adamts17, Trpm1, Nmb, Relt, Itgad, Ticrr, B3gnt8, Alpk3, Zkscan2, ENSRNOG00000021484, Ucp3, Ethe1, Rtn2, Ptprcap, ENSRNOG00000068667, Gsto2, Syt7, Fxyd5, …	295	Gde1, Prss23, Ptpn5, Med10, Asrgl1, Ube2ql1, Htatip2, Rin1, Cib1, Gdpgp1, Nfkbib, Aig1, Tmem86a, Ap2s1, Tgfb1, Bnip3, Nmb, Relt, Itgad, B3gnt8, ENSRNOG00000021484, Ucp3, Ethe1, Fxyd5, Dhcr7, Rnls, Enpp3, Prdx5, LOC100361913, Igf2r, Ostf1, Atrnl1, ENSRNOG00000064803, Prdx3, Smpd1, Pgam1, Nlrp10, Olr155, Taf13, Gpr88, Ca13, ENSRNOG00000062927, Anxa5, Cmya5, Dclk2, ENSRNOG00000061379, Rbm46, Tpd52, …	299	Irx2, Ttyh1, Zfp61, Mctp2, Klk13, Gna14, Adamtsl3, Abcc6, Ptpre, Mrgpre, Vstm2b, Epm2a, ENSRNOG00000067308, Smoc2, Ano5, Utf1, Adamts17, Trpm1, Ticrr, Alpk3, Zkscan2, Rtn2, Ptprcap, ENSRNOG00000068667, Gsto2, Syt7, Chst8, Fxyd7, Zfp536, Sox6, Psd, Plekha7, Crym, Olr118-ps, Acsm5, Fads2, Dlg2, Plpp4, Cd19, Cyb5r2, Pnma8c, Naaladl2, Foxo1, Frem2, Sema5a, Celsr2, Vcan, Kcnab1, Abca4, Arhgef28, Gstm7…
59	ENSRNOG00000067151	609	Gde1, Prss23, Klk13, Gna14, Adamtsl3, Avpi1, Med10, Asrgl1, Mrgpre, Htatip2, Vstm2b, Hells, Stx11, Rin1, Sytl2, Cib1, Gdpgp1, Lipe, ENSRNOG00000067308, Chrna7, Nfkbib, Aig1, Tmem86a, Scube2, Tcirg1, Ano5, Ctsd, Nlrp14, Ap2s1, Tgfb1, Pcsk6, Aldh3b1, Adamts17, Trpm1, Mrps12, Nmb, Relt, Itgad, Ticrr, B3gnt8, Alpk3, Zkscan2, Ucp3, Actn4, Rtn2, Hapln3, ENSRNOG00000068667, Zfp551, Dhcr7, Chst8, Zp1, Dm…	370	Gde1, Prss23, Avpi1, Med10, Asrgl1, Htatip2, Stx11, Rin1, Sytl2, Cib1, Gdpgp1, Lipe, Chrna7, Nfkbib, Aig1, Tmem86a, Tcirg1, Ctsd, Ap2s1, Tgfb1, Aldh3b1, Mrps12, Nmb, Relt, Itgad, B3gnt8, Ucp3, Actn4, Hapln3, Dhcr7, Dmkn, Prdx5, LOC100361913, RGD1311946, LOC688924, Lrrc51, Ostf1, Adam12, Il27, Scd, LOC120097921, LOC100910107, ENSRNOG00000064803, Smpd1, Pgam1, Nlrp10, Tub, Olr154, Olr155, Olr157, G…	239	Klk13, Gna14, Adamtsl3, Mrgpre, Vstm2b, Hells, ENSRNOG00000067308, Scube2, Ano5, Nlrp14, Pcsk6, Adamts17, Trpm1, Ticrr, Alpk3, Zkscan2, Rtn2, ENSRNOG00000068667, Zfp551, Chst8, Zp1, Dpf1, Tdrd1, Zfp536, Nlrp5, Plekha7, Nlrp4a, Olr118-ps, Acsm5, Plpp4, Cyb5r2, Pnma8c, Naaladl2, Pabpc4l, Foxo1, Trpc4, Sema5a, Vcan, Kcnab1, Abca4, Arhgef28, Psrc1, Gstm7, Pcdh10, Sycp1, Ccno, Cspg4b, Bmpr1b, Depdc1, …
60	ENSRNOG00000067235	515	Irx2, Ttyh1, Zfp61, Prss23, Ptpn5, Klk13, Gna14, Adamtsl3, Arntl, Abcc6, Med10, Ptpre, Asrgl1, Ube2ql1, Apoe, Mrgpre, Vstm2b, Rin1, Cib1, Epm2a, Zfp541, P2ry2, Gdpgp1, Nfkbib, Tmem86a, Smoc2, Ano5, Utf1, Ap2s1, Tgfb1, Bnip3, Adamts17, Trpm1, Nmb, Relt, Itgad, Ticrr, B3gnt8, Zkscan2, ENSRNOG00000021484, Ucp3, Ethe1, Rtn2, Adgra1, Ptprcap, Gsto2, Fxyd5, Dhcr7, Hif3a, Themis, Rnls, Nlrp6, Chst8, Prd…	267	Prss23, Ptpn5, Arntl, Med10, Asrgl1, Ube2ql1, Rin1, Cib1, P2ry2, Gdpgp1, Nfkbib, Tmem86a, Ap2s1, Tgfb1, Bnip3, Nmb, Relt, Itgad, B3gnt8, ENSRNOG00000021484, Ucp3, Ethe1, Adgra1, Fxyd5, Dhcr7, Rnls, Prdx5, LOC100361913, Pvr, RGD1311946, Cadm4, Pik3ap1, Ostf1, Clcf1, Adam12, Atrnl1, Prdx3, Pgam1, Lekr1, Taf13, Gpr88, Ca13, ENSRNOG00000062927, Tmigd3, Anxa5, Cmya5, Hspa4l, LOC100363268, Slc16a4, Hsd…	248	Irx2, Ttyh1, Zfp61, Klk13, Gna14, Adamtsl3, Abcc6, Ptpre, Apoe, Mrgpre, Vstm2b, Epm2a, Zfp541, Smoc2, Ano5, Utf1, Adamts17, Trpm1, Ticrr, Zkscan2, Rtn2, Ptprcap, Gsto2, Hif3a, Themis, Nlrp6, Chst8, Fxyd7, Zfp536, Sox6, Psd, Mamdc2, Plekha7, Crym, Acsm5, Fads2, Dlg2, Pnma8c, Foxo1, Celsr2, Kcnab1, Abca4, Arhgef28, Gstm7, Pcdh10, Sycp1, Cspg4b, Ddit4l2, Trpc3, Grm8, Mest, Lrtm2, Plxna4, Pclo, Dpp6,…
61	ENSRNOG00000067290	130	Habp2, Mctp2, ENSRNOG00000063011, Kcnc3, Klk8, ENSRNOG00000068605, Lipe, Oca2, Rnf225, Sorcs3, Gda, Cdkn1c, Nkain2, Ascl3, Slc35g1, Cyb5r2, Frem2, Ppm1l, Trpc3, Pex1, A2m, Tmem72, ENSRNOG00000064685, Prkag2, Slc6a6, Dysf, Fgd5, Dusp16, Adra2b, Bpifb2, Ptgds, Lrp1b, Sp5, Tspy26, Gdf5, Extl1, C1qtnf12, Tnfrsf9, Oprk1, Ctps1, Gata1, Ripply1, Egfl6, Zcchc18, Magee2, ENSRNOG00000065552, LOC299190, LOC…	54	Kcnc3, Lipe, Rnf225, Gda, Ascl3, Slc35g1, Ppm1l, Pex1, A2m, Prkag2, Slc6a6, Dysf, Fgd5, Dusp16, Adra2b, Bpifb2, Gdf5, Extl1, Tnfrsf9, Ctps1, Ripply1, LOC299190, Ccdc88c, Vipr2, Scn8a, Mtss1, Rgl3, Bsn, LOC120094258, Thy1, PCOLCE2, Cmtm6, Myo1b, Lrrc73, Mpp3, Grin2c, Ttyh2, Tmem104, Sec14l1, Epop, Fam161a, Clhc1, Gzmc, Pfkfb3, Thnsl1, Map6d1, Pcdh12, RGD1304884, RT1-T24-1, Ccdc162, Rab44, Pilrb, M…	76	Habp2, Mctp2, ENSRNOG00000063011, Klk8, ENSRNOG00000068605, Oca2, Sorcs3, Cdkn1c, Nkain2, Cyb5r2, Frem2, Trpc3, Tmem72, ENSRNOG00000064685, Ptgds, Lrp1b, Sp5, Tspy26, C1qtnf12, Oprk1, Gata1, Egfl6, Zcchc18, Magee2, ENSRNOG00000065552, LOC362758, Sptssa, Gsdmd, ENSRNOG00000066006, ENSRNOG00000064198, Amhr2, Pde1b, RGD1565410, LOC300024, LOC120093684, Cadm1, LOC103690166, ENSRNOG00000069423, Ephb1,…
62	ENSRNOG00000067408	223	Ptgdr2, Prss23, Arntl, Med10, Apoe, Stx11, Rin1, Sytl2, Zfp541, P2ry2, Tcirg1, Tgfb1, Bnip3, Itgad, Ucp3, Ethe1, Actn4, Rtn2, Adgra1, Zp1, Dmkn, Pvr, RGD1311946, Psd, Ahrr, Sbsn, Adam12, Scd, Lekr1, Taf13, S1pr1, Kcnab1, Dhfr, Bhmt, Pdlim5, Frrs1, Hspa4l, Ddit4l2, Hsd3b1, Gpr37, Tspan33, Il23r, Gadd45a, Tes, Akr1b7, Sri, Tigar, Cdk14, Rep15, Actr3b, Grin2b, Rheb, ENSRNOG00000026675, Nobox, Mgll, …	174	Prss23, Arntl, Med10, Stx11, Rin1, Sytl2, P2ry2, Tcirg1, Tgfb1, Bnip3, Itgad, Ucp3, Ethe1, Actn4, Adgra1, Dmkn, Pvr, RGD1311946, Ahrr, Sbsn, Adam12, Scd, Lekr1, Taf13, S1pr1, Dhfr, Bhmt, Pdlim5, Frrs1, Hspa4l, Hsd3b1, Tspan33, Il23r, Gadd45a, Tes, Akr1b7, Sri, Tigar, Cdk14, Rep15, Actr3b, Grin2b, Rheb, Mgll, Adamts9, Gss, Gpr176, Cd44, Chgb, Emc4, Sdc4, Klhl41, Snap25, Fam102a, Aurka, Il1rn, LOC5…	49	Ptgdr2, Apoe, Zfp541, Rtn2, Zp1, Psd, Kcnab1, Ddit4l2, Gpr37, ENSRNOG00000026675, Nobox, Art4, Sptlc3, Rad21l1, Bmp2, Ass1, Jph1, Kcnb2, Pramef20, Raver2, Cavin4, Clspn, Mycn, Lratd1, Dio2, Chga, ENSRNOG00000068484, RGD1564409, Krt84, C2cd4c, Kif15, Ica1l, Rims1, Zfp39, Rhbdl3, Nckap5, Armh4, Mkx, Eif4e1b, Ryr2, Myh15, Tll1, Xkr5, Rab11fip1, Poteg, ENSRNOG00000062467, Cbln1, Fanca, LOC688390
63	ENSRNOG00000067595	182	Irx2, Ptgdr2, Ptpn5, Arntl, Abcc6, Med10, Ube2ql1, Apoc4, Apoe, Carns1, Kcnq1, Rin1, Anpep, Zfp541, P2ry2, Rab38, Bnip3, ENSRNOG00000021484, Prune2, Themis, Nlrp6, Pvr, Sox6, Psd, Ahrr, Mamdc2, Atrnl1, Lekr1, Plk2, Homer1, Tmigd3, Pdlim5, Frrs1, Osmr, Myo10, Hspa4l, Hk2, Tspan33, Mthfd2, Plxna4, Tmem140, Tigar, ENSRNOG00000014312, Apold1, Pzp, Adamts9, Itpripl1, ENSRNOG00000028910, Slc25a25, Snap…	117	Ptpn5, Arntl, Med10, Ube2ql1, Carns1, Rin1, Anpep, P2ry2, Rab38, Bnip3, ENSRNOG00000021484, Prune2, Pvr, Ahrr, Atrnl1, Lekr1, Plk2, Homer1, Tmigd3, Pdlim5, Frrs1, Osmr, Myo10, Hspa4l, Hk2, Tspan33, Mthfd2, Tmem140, Tigar, Apold1, Pzp, Adamts9, Itpripl1, ENSRNOG00000028910, Slc25a25, Snap25, ENSRNOG00000065655, Ncs1, Sdcbp2, Creb3l1, Bhlhe23, Myom3, Clic4, Tnc, Iffo2, Cpt2, Rhbdl2, Ctps1, Armcx4, …	65	Irx2, Ptgdr2, Abcc6, Apoc4, Apoe, Kcnq1, Zfp541, Themis, Nlrp6, Sox6, Psd, Mamdc2, Plxna4, ENSRNOG00000014312, Kcnb2, Crispld1, Kif24, ENSRNOG00000068796, Cavin4, Plxnb3, Rnf128, Slc25a53, Zcchc18, Map3k15, ENSRNOG00000067691, Dio2, Chadl, Gsdmd, Hmga2, Krt84, Soat2, Mal2, ENSRNOG00000070877, LOC300024, Cd3e, Cadm1, LOC103690166, Gpr62, Gsta4, Ltf, Slc6a20a, Zap70, Zfp39, Trim58, Bricd5, Slc47a2,…
64	ENSRNOG00000067701	452	Habp2, Gde1, Ckm, Gpr4, Mctp2, Klk13, Avpi1, Med10, ENSRNOG00000063011, Apoc1, Pnliprp2, Hells, Rin1, Klk7, Sytl2, ENSRNOG00000068605, Gdpgp1, Lipe, Nfkbib, Aig1, Tcirg1, Ctsd, ENSRNOG00000064437, Nlrp14, Cyp2b1, Aldh3b1, Gdpd4, Mrps12, Kcnk4, B3gnt8, LOC100911413, Tnfrsf22, Doc2a, Actn4, Hapln3, Mfge8, ENSRNOG00000068667, Zfp551, Dhcr7, LOC681458, Gda, Prdx5, Tex36, Dpf1, Nkpd1, Cdkn1c, Zfp536, …	116	Habp2, Mctp2, Klk13, ENSRNOG00000063011, Apoc1, Hells, Klk7, ENSRNOG00000068605, Nlrp14, Cyp2b1, ENSRNOG00000068667, Zfp551, Dpf1, Cdkn1c, Zfp536, Nlrp5, Gng3, Cyb5r2, Naaladl2, Pabpc4l, Cenph, Trpc4, Vcan, Abca4, Psrc1, Pcdh10, Bnipl, Depdc1, Plxna4, LOC500331, Klf15, Sox5, H1f8, Rnf208, Obp2a, Lrp1b, Phactr3, Sp5, Tspy26, Pou3f1, Kif2c, C1qtnf12, Pramef20, Fam151a, Npr2, Gata1, Mbnl3, Bex1, Mag…	336	Gde1, Ckm, Gpr4, Avpi1, Med10, Pnliprp2, Rin1, Sytl2, Gdpgp1, Lipe, Nfkbib, Aig1, Tcirg1, Ctsd, ENSRNOG00000064437, Aldh3b1, Gdpd4, Mrps12, Kcnk4, B3gnt8, LOC100911413, Tnfrsf22, Doc2a, Actn4, Hapln3, Mfge8, Dhcr7, LOC681458, Gda, Prdx5, Tex36, Nkpd1, Lrrc51, Rln1, ENSRNOG00000064803, Smpd1, Hpx, Slc35g1, Pgam1, Nlrp10, Tub, Ric3, Olr154, Olr155, Pde4d, Tuft1, S1pr1, Snx7, ENSRNOG00000069130, Dhf…
65	ENSRNOG00000067729	169	Apoc1, Apoe, Sct, Rin1, Sytl2, P2ry2, Aig1, Rab38, Kcnk4, Ucp3, Actn4, Hapln3, Mfge8, Pvr, RGD1311946, Nkpd1, Ahrr, Trdn, Sbsn, Pabpc4l, Tuft1, Tmem171, S1pr1, Snx7, Polr3g, Bhmt, Pdlim5, Hspa4l, Gpr37, Pdk4, Hk2, Tspan33, Tes, Akr1b7, Sri, Tigar, Grin2b, Rheb, Gucy2c, Mgll, Aldh1l1, Cd44, Rims4, Rad21l1, Slc23a2, Emc4, Wfdc8, Snap25, Aurka, LOC502684, LOC100361457, Map3k6, Runx3, Clic4, Casz1, E…	20	Apoc1, Apoe, Trdn, Pabpc4l, Gpr37, Rad21l1, Rnf128, Mageb6b1, ENSRNOG00000067691, RGD1564409, LOC120093114, Gsta4, Ltf, ENSRNOG00000069312, Zfp39, Nwd2, Pf4, Enpp6, ENSRNOG00000062467, Wasf1	149	Sct, Rin1, Sytl2, P2ry2, Aig1, Rab38, Kcnk4, Ucp3, Actn4, Hapln3, Mfge8, Pvr, RGD1311946, Nkpd1, Ahrr, Sbsn, Tuft1, Tmem171, S1pr1, Snx7, Polr3g, Bhmt, Pdlim5, Hspa4l, Pdk4, Hk2, Tspan33, Tes, Akr1b7, Sri, Tigar, Grin2b, Rheb, Gucy2c, Mgll, Aldh1l1, Cd44, Rims4, Slc23a2, Emc4, Wfdc8, Snap25, Aurka, LOC502684, LOC100361457, Map3k6, Runx3, Clic4, Casz1, Epha2, Tmco4, Fam214b, Sdcbp, Tp53inp1, Cdh17…
66	ENSRNOG00000067743	695	Ptgdr2, Gde1, Gpr4, Prss23, Ptpn5, Klk13, Avpi1, Arntl, Med10, Ube2ql1, Apoe, Hells, Ldaf1, Sct, Kcnq1, Stx11, Rin1, Klk7, Sytl2, Cib1, Zfp541, P2ry2, Gdpgp1, Nfkbib, Aig1, Tmem86a, Tcirg1, Ano5, Ctsd, ENSRNOG00000064437, Nlrp14, Ap2s1, Tgfb1, Bnip3, Aldh3b1, Gdpd4, Trpm1, Mrps12, Relt, Kcnk4, Ticrr, B3gnt8, Ucp3, Ethe1, Tnfrsf22, Actn4, Rtn2, Hapln3, Prune2, Mfge8, ENSRNOG00000068667, Zfp551, Dh…	218	Ptgdr2, Klk13, Apoe, Hells, Kcnq1, Klk7, Zfp541, Ano5, Nlrp14, Trpm1, Ticrr, Rtn2, ENSRNOG00000068667, Zfp551, Chst8, Zp1, Dpf1, Tdrd1, Zfp536, ENSRNOG00000066174, Psd, Nlrp5, Cnnm1, Plekha7, Nlrp4a, Fads2, Dlg2, Cyb5r2, Pnma8c, Naaladl2, Pabpc4l, Cenph, Trpc4, Sema5a, Celsr2, Vcan, Kcnab1, Abca4, Arhgef28, Psrc1, Pcdh10, Sycp1, Ccno, Cspg4b, Bmpr1b, Ddit4l2, Depdc1, Gpr37, Lrtm2, Plxna4, LOC5003…	477	Gde1, Gpr4, Prss23, Ptpn5, Avpi1, Arntl, Med10, Ube2ql1, Ldaf1, Sct, Stx11, Rin1, Sytl2, Cib1, P2ry2, Gdpgp1, Nfkbib, Aig1, Tmem86a, Tcirg1, Ctsd, ENSRNOG00000064437, Ap2s1, Tgfb1, Bnip3, Aldh3b1, Gdpd4, Mrps12, Relt, Kcnk4, B3gnt8, Ucp3, Ethe1, Tnfrsf22, Actn4, Hapln3, Prune2, Mfge8, Dhcr7, LOC681458, Dmkn, Prdx5, LOC100361913, Tex36, Vnn3, Pvr, RGD1311946, Nkpd1, LOC688924, Ahrr, Lrrc51, Sbsn, …
67	ENSRNOG00000067835	840	Irx2, Ttyh1, Habp2, Gde1, Prss23, Ptpn5, Mctp2, Klk13, Gna14, Adamtsl3, Cd248, Avpi1, Arntl, Med10, Ptpre, Asrgl1, Ube2ql1, ENSRNOG00000063011, Apoe, Mrgpre, Htatip2, Vstm2b, Hells, Ldaf1, Kcnq1, Stx11, Rin1, Klk7, Sytl2, Cib1, ENSRNOG00000068605, Wnt11, Zfp541, P2ry2, Gdpgp1, Lipe, ENSRNOG00000067308, Nfkbib, Aig1, Tmem86a, Smoc2, Scube2, Tcirg1, Ano5, Ctsd, Nlrp14, Ap2s1, Tgfb1, Bnip3, Pcsk6, A…	494	Gde1, Prss23, Ptpn5, Cd248, Avpi1, Arntl, Med10, Asrgl1, Ube2ql1, Htatip2, Ldaf1, Stx11, Rin1, Sytl2, Cib1, P2ry2, Gdpgp1, Lipe, Nfkbib, Aig1, Tmem86a, Tcirg1, Ctsd, Ap2s1, Tgfb1, Bnip3, Aldh3b1, Gdpd4, Mrps12, Nmb, Relt, Kcnk4, B3gnt8, Ucp3, Ethe1, Actn4, Prune2, Dhcr7, Gda, Prdx5, LOC100361913, Igf2r, Vnn3, RGD1311946, LOC688924, Kiaa0408L, Soga3, Lrrc51, Pik3ap1, Ostf1, Nmrk1, Adam12, Il27, At…	346	Irx2, Ttyh1, Habp2, Mctp2, Klk13, Gna14, Adamtsl3, Ptpre, ENSRNOG00000063011, Apoe, Mrgpre, Vstm2b, Hells, Kcnq1, Klk7, ENSRNOG00000068605, Wnt11, Zfp541, ENSRNOG00000067308, Smoc2, Scube2, Ano5, Nlrp14, Pcsk6, Adamts17, Trpm1, Ticrr, Alpk3, Zkscan2, Rtn2, Ptprcap, ENSRNOG00000068667, Gsto2, Zfp551, Chst8, Zp1, Dpf1, Tdrd1, Zfp536, Sox6, Psd, Nlrp5, Cnnm1, Plekha7, Nlrp4a, Olr118-ps, Acsm5, Fads2…
68	ENSRNOG00000067921	654	Irx2, Ttyh1, Gde1, Ptpn5, Mctp2, Klk13, Gna14, Adamtsl3, Avpi1, Abcc6, Med10, Ptpre, Asrgl1, Ube2ql1, ENSRNOG00000063011, Mrgpre, Htatip2, Vstm2b, Hells, Rin1, Cib1, Wnt11, Gdpgp1, Lipe, ENSRNOG00000067308, Nfkbib, Tmem86a, Smoc2, Ano5, Utf1, Ap2s1, Tgfb1, Bnip3, Pcsk6, Adamts17, Trpm1, Nmb, Relt, B3gnt8, Alpk3, Zkscan2, ENSRNOG00000021484, Ptprcap, ENSRNOG00000068667, Gsto2, Zfp551, Sorcs3, Dhcr…	319	Gde1, Ptpn5, Avpi1, Med10, Asrgl1, Ube2ql1, Htatip2, Rin1, Cib1, Gdpgp1, Lipe, Nfkbib, Tmem86a, Ap2s1, Tgfb1, Bnip3, Nmb, Relt, B3gnt8, ENSRNOG00000021484, Dhcr7, Rnls, Prdx5, LOC100361913, Igf2r, Kiaa0408L, Soga3, Lrrc51, Ostf1, Atrnl1, ENSRNOG00000064803, Prdx3, Smpd1, Pgam1, Nlrp10, Tub, Olr155, Taf13, Ca13, ENSRNOG00000062927, Vav3, Anxa5, Cmya5, Dclk2, Plpp1, Rbm46, Lrat, Tpd52, RGD1563667, …	335	Irx2, Ttyh1, Mctp2, Klk13, Gna14, Adamtsl3, Abcc6, Ptpre, ENSRNOG00000063011, Mrgpre, Vstm2b, Hells, Wnt11, ENSRNOG00000067308, Smoc2, Ano5, Utf1, Pcsk6, Adamts17, Trpm1, Alpk3, Zkscan2, Ptprcap, ENSRNOG00000068667, Gsto2, Zfp551, Sorcs3, Chst8, Dpf1, Fxyd7, Zfp536, Sox6, Psd, Nlrp5, Plekha7, Olr118-ps, Acsm5, Fads2, Plpp4, Cd19, Cyb5r2, Pnma8c, Naaladl2, Pabpc4l, Trpc4, Frem2, Sema5a, Celsr2, Vc…
69	ENSRNOG00000068008	29	Ptgdr2, Kcnq1, F2rl1, Sfrp2, Anxa9, Elovl6, Inmt, Ttn, Bbox1, Muc15, Nyx, Anxa13, Ephx3, Slc38a3, Scn3b, Slc6a20a, Slc47a2, Wnt9b, Hlf, RGD1564463, Kiss1, Gpat3, Nrsn1, Gprin2, Myo16, RGD1305184, Bean1, Chst4, Rph3a	7	F2rl1, Muc15, Nyx, Ephx3, Wnt9b, Gpat3, Bean1	22	Ptgdr2, Kcnq1, Sfrp2, Anxa9, Elovl6, Inmt, Ttn, Bbox1, Anxa13, Slc38a3, Scn3b, Slc6a20a, Slc47a2, Hlf, RGD1564463, Kiss1, Nrsn1, Gprin2, Myo16, RGD1305184, Chst4, Rph3a
70	ENSRNOG00000068040	58	Relt, Ticrr, Fxyd5, Dmkn, ENSRNOG00000066174, Dlg2, Magel2, Plppr4, ENSRNOG00000061379, ENSRNOG00000067100, Ca14, Bmpr1b, Rep15, ENSRNOG00000067295, ENSRNOG00000060843, Nobox, ENSRNOG00000063189, Jph1, Clspn, Slc16a2, RGD1565862, Wnk3, Ptchd1, Id2, Chga, Tafa5, Lgals2, Espl1, Ccdc15, Ctsh, Spsb4, Chrna3, ENSRNOG00000062997, LOC108349479, Cps1, Lonrf2, Aff3, Il1r2, Ccnf, Cdc6, Gdf9, Brca1, Slc13a5…	15	Relt, Fxyd5, Dmkn, ENSRNOG00000061379, Rep15, Slc16a2, Id2, Tafa5, Lgals2, Ctsh, Chrna3, Il1r2, H1f6, Plaat1, Lpcat2	43	Ticrr, ENSRNOG00000066174, Dlg2, Magel2, Plppr4, ENSRNOG00000067100, Ca14, Bmpr1b, ENSRNOG00000067295, ENSRNOG00000060843, Nobox, ENSRNOG00000063189, Jph1, Clspn, RGD1565862, Wnk3, Ptchd1, Chga, Espl1, Ccdc15, Spsb4, ENSRNOG00000062997, LOC108349479, Cps1, Lonrf2, Aff3, Ccnf, Cdc6, Gdf9, Brca1, Slc13a5, LOC102550466, LOC102547093, ENSRNOG00000070692, Tubb2b, Wnk2, Hecw1, Trat1, Map3k13, Angpt2, U…
71	ENSRNOG00000068121	166	Ckm, Hells, Chrna7, Aig1, Scube2, Ctsd, Ap2s1, Mrps12, ENSRNOG00000068667, Zfp551, Dmkn, LOC688924, Lrrc51, Il27, ENSRNOG00000064803, Smpd1, Olr118-ps, Slc35g1, Olr154, Olr155, Olr157, Naaladl2, Gnat2, Dhfr, Abca4, Serf1, S100a9, Mocs2, ENSRNOG00000061379, Tpd52, Bmpr1b, Depdc1, Hsd3b3, Gask1b, F2rl2, Eva1a, Tmem40, Gadd45a, Herc3, Tspan12, Clec2d2, Prkag2, Bcat1, Kcnj8, Clec12a, Dusp16, Gucy2c, …	51	Hells, Scube2, ENSRNOG00000068667, Zfp551, Olr118-ps, Naaladl2, Abca4, Bmpr1b, Depdc1, Adal, LOC102554479, Kif2c, Fam151a, Rps6ka6, RGD1565862, ENSRNOG00000064007, Npas3, Esr2, Amhr2, Troap, Espl1, ENSRNOG00000066139, Btg4, Khdc3, Bcl2l10, Spsb4, LOC108349479, Hjurp, Bard1, Ikzf3, Efnb3, Ccnf, Cbx2, Top2a, Myocd, Gdf9, Kif14, Dtl, Gal3st1, Tubb2b, Wnk2, LOC685767, Tmem221, Cacna2d3, Lox, Hhip, Pn…	115	Ckm, Chrna7, Aig1, Ctsd, Ap2s1, Mrps12, Dmkn, LOC688924, Lrrc51, Il27, ENSRNOG00000064803, Smpd1, Slc35g1, Olr154, Olr155, Olr157, Gnat2, Dhfr, Serf1, S100a9, Mocs2, ENSRNOG00000061379, Tpd52, Hsd3b3, Gask1b, F2rl2, Eva1a, Tmem40, Gadd45a, Herc3, Tspan12, Clec2d2, Prkag2, Bcat1, Kcnj8, Clec12a, Dusp16, Gucy2c, Mgll, Aldh1l1, Srp14, Lpin3, Bpifb2, Nostrin, Fam167b, Padi3, Ptpn3, Ttc39a, Dhcr24, Pl…
72	ENSRNOG00000068224	819	Irx2, Ptgdr2, Habp2, Gde1, Prss23, Ptpn5, Mctp2, Klk13, Gna14, Adamtsl3, Avpi1, Arntl, Med10, Asrgl1, Ube2ql1, ENSRNOG00000063011, Apoc4, Apoc1, Apoe, Bnc1, Mrgpre, Hells, Ldaf1, Kcnq1, Stx11, Rin1, Klk7, Sytl2, Cib1, ENSRNOG00000068605, Wnt11, Zfp541, P2ry2, Gdpgp1, Lipe, ENSRNOG00000067308, Nfkbib, Tmem86a, Tcirg1, Ano5, Gpha2, Nlrp14, Ap2s1, Tgfb1, Bnip3, Pcsk6, Aldh3b1, Adamts17, Gdpd4, Trpm1…	327	Irx2, Ptgdr2, Habp2, Mctp2, Klk13, Gna14, Adamtsl3, ENSRNOG00000063011, Apoc4, Apoc1, Apoe, Bnc1, Mrgpre, Hells, Kcnq1, Klk7, ENSRNOG00000068605, Wnt11, Zfp541, ENSRNOG00000067308, Ano5, Gpha2, Nlrp14, Pcsk6, Adamts17, Trpm1, Alpk3, Rtn2, Ptprcap, ENSRNOG00000068667, Gsto2, Zfp551, Chst8, Dpf1, Tdrd1, Zfp536, Sox6, Psd, Nlrp5, Cnnm1, Plekha7, Nlrp4a, Acsm5, Fads2, Plpp4, Cyb5r2, Pnma8c, Naaladl2,…	492	Gde1, Prss23, Ptpn5, Avpi1, Arntl, Med10, Asrgl1, Ube2ql1, Ldaf1, Stx11, Rin1, Sytl2, Cib1, P2ry2, Gdpgp1, Lipe, Nfkbib, Tmem86a, Tcirg1, Ap2s1, Tgfb1, Bnip3, Aldh3b1, Gdpd4, Mrps12, Nmb, Relt, Kcnk4, B3gnt8, ENSRNOG00000021484, Ucp3, Ethe1, Tnfrsf22, Actn4, Prune2, Loxl4, Dhcr7, Gda, Prdx5, LOC100361913, Tex36, Igf2r, Vnn3, Pvr, RGD1311946, Kiaa0408L, Soga3, Folr1, Ahrr, Lrrc51, Pik3ap1, Ostf1, …
73	ENSRNOG00000068246	102	Mctp2, Gna14, ENSRNOG00000063011, Vstm2b, Kcnc3, ENSRNOG00000068605, Oca2, Rnf225, Zkscan2, Sorcs3, Nkain2, Fxyd7, ENSRNOG00000064803, Ascl3, Cyb5r2, Frem2, Trpc3, RGD1563231, Tmem72, ENSRNOG00000064685, ENSRNOG00000066615, ENSRNOG00000068013, Bpifb2, ENSRNOG00000065655, LOC120102087, C1qtnf12, Tnfrsf9, Sit1, Egfl6, Slc25a53, Zcchc18, Pof1b, LOC299190, Sptssa, Bcl11b, Vipr2, Gsdmd, ENSRNOG0000006…	27	Kcnc3, Rnf225, ENSRNOG00000064803, Ascl3, Bpifb2, ENSRNOG00000065655, LOC120102087, Tnfrsf9, LOC299190, Vipr2, Mtss1, LOC120094258, PCOLCE2, Cmtm6, Myo1b, Lrrc73, Grin2c, Epop, Alox15, Pcdh17, Gzmc, Msx2, RGD1563601, Thnsl1, RT1-T24-1, Rab44, Chst12	75	Mctp2, Gna14, ENSRNOG00000063011, Vstm2b, ENSRNOG00000068605, Oca2, Zkscan2, Sorcs3, Nkain2, Fxyd7, Cyb5r2, Frem2, Trpc3, RGD1563231, Tmem72, ENSRNOG00000064685, ENSRNOG00000066615, ENSRNOG00000068013, C1qtnf12, Sit1, Egfl6, Slc25a53, Zcchc18, Pof1b, Sptssa, Bcl11b, Gsdmd, ENSRNOG00000066006, ENSRNOG00000064198, RGD1561648, Ascl4, RGD1565410, Cadm1, LOC103690166, ENSRNOG00000069423, Ephb1, Ky, En…
74	ENSRNOG00000068332	207	Gpr4, Carns1, Sct, Rin1, Sytl2, P2ry2, Rab38, Tcirg1, Mrps12, Kcnk4, Tnfrsf22, Actn4, Hapln3, Prune2, Mfge8, Nphs1, LOC681458, Ptgir, Tex36, RGD1311946, Nkpd1, Ahrr, Sbsn, Hpx, Itga10, Plk2, Glrx, Tuft1, Tmem171, S1pr1, Snx7, Polr3g, Dhfr, Bhmt, Pdlim5, Sh3d19, Hsd3b2, Hspa4l, Hsd3b5, Gpr37, Tspan33, Mthfd2, Tes, Akr1b7, Sri, Tmem140, Tigar, Apold1, Grin2b, Rheb, LOC500331, Nobox, Pcyox1, Snx10, …	11	Gpr37, LOC500331, Nobox, C2cd4c, Gsta4, Ltf, Scg2, Zfp39, LOC102556277, Nwd2, ENSRNOG00000062467	196	Gpr4, Carns1, Sct, Rin1, Sytl2, P2ry2, Rab38, Tcirg1, Mrps12, Kcnk4, Tnfrsf22, Actn4, Hapln3, Prune2, Mfge8, Nphs1, LOC681458, Ptgir, Tex36, RGD1311946, Nkpd1, Ahrr, Sbsn, Hpx, Itga10, Plk2, Glrx, Tuft1, Tmem171, S1pr1, Snx7, Polr3g, Dhfr, Bhmt, Pdlim5, Sh3d19, Hsd3b2, Hspa4l, Hsd3b5, Tspan33, Mthfd2, Tes, Akr1b7, Sri, Tmem140, Tigar, Apold1, Grin2b, Rheb, Pcyox1, Snx10, Gucy2c, Mgll, Aldh1l1, So…
75	ENSRNOG00000068539	60	Dact2, Wnt11, Hamp, Cnih2, Slc22a6, Folr1, Vstm1, Anxa5, Fabp4, Lrat, Creb3l4, Ctnna2, Abcb1b, Cntn3, Trib3, Tox2, Aplnr, Per3, Epb41l4b, Orm1, Fgf13, Dio3, Plekhd1, Acot1, Avpr1a, Apoa1, Robo3, Dlgap1, Sphkap, Igfals, Sez6, Aldh3a1, Tekt3, Btnl9, Ablim2, Cnga1, Rasgef1b, Cfap20dc, Sftpc, Akr1c13, Dcdc2, App, Lpl, Slc25a15, Col4a2, Col4a1, Aadat, LOC120098380, Camk2a, Ctrb1, Sall1, Il34, RGD15617…	25	Wnt11, Hamp, Creb3l4, Ctnna2, Abcb1b, Cntn3, Tox2, Per3, Fgf13, Dio3, Plekhd1, Robo3, Dlgap1, Aldh3a1, Tekt3, Rasgef1b, Cfap20dc, Sftpc, Dcdc2, Camk2a, Ctrb1, Sall1, Btnl2, Cbs, Bnip5	35	Dact2, Cnih2, Slc22a6, Folr1, Vstm1, Anxa5, Fabp4, Lrat, Trib3, Aplnr, Epb41l4b, Orm1, Acot1, Avpr1a, Apoa1, Sphkap, Igfals, Sez6, Btnl9, Ablim2, Cnga1, Akr1c13, App, Lpl, Slc25a15, Col4a2, Col4a1, Aadat, LOC120098380, Il34, RGD1561777, RT1-CE2, Tff3, Kl, ENSRNOG00000043866
76	ENSRNOG00000068968	109	Htatip2, Nmb, ENSRNOG00000068667, Pnlip, LOC100361913, ENSRNOG00000064803, Olr118-ps, Acsm5, Cd19, Olr155, Olr157, Pnma8c, Naaladl2, ENSRNOG00000062927, Dclk2, Sycp1, Ca3, RGD1563667, Ptx3, Mest, Nap1l5, Cpa2, Pclo, Clec2d2, Tmem139, Lrig1, Hoxa4, Neb, Fermt1, Emilin3, Wfdc10a, Arl5a, LOC120102087, Aif1l, ENSRNOG00000067752, LOC102554479, Pamr1, Ldlrad2, Frmd3, Atp2b3, Nr0b1, Bex4, Maged2, Msh2, …	63	ENSRNOG00000068667, Olr118-ps, Acsm5, Cd19, Pnma8c, Naaladl2, Sycp1, Ptx3, Mest, Cpa2, Pclo, Lrig1, Hoxa4, Fermt1, Emilin3, Wfdc10a, Aif1l, ENSRNOG00000067752, LOC102554479, Pamr1, Frmd3, Atp2b3, Nr0b1, Bex4, Msh2, Fshr, Crim1, Prkar2b, Mycn, Esr2, Serpina5, Sptb, Bcl11b, Plxnc1, Ascl4, Tnfrsf11b, Megf11, Pknox2, RGD1561444, Acsbg1, Lsmem2, Wnt6, Inha, Ikzf3, Havcr1, Atad5, Hsd17b1, Unc45b, Ly9, …	46	Htatip2, Nmb, Pnlip, LOC100361913, ENSRNOG00000064803, Olr155, Olr157, ENSRNOG00000062927, Dclk2, Ca3, RGD1563667, Nap1l5, Clec2d2, Tmem139, Neb, Arl5a, LOC120102087, Ldlrad2, Maged2, Scx, Pgm3, Rbp2, Rpp25, Hspd1, Hspe1, Mob4, Tmem14a, Serpinf1, Grin2c, Sh3pxd2b, Asgr1, Pdlim4, Shisa4, Hsd11b1, Nefh, Clhc1, LOC360919, RGD1563601, Ucma, LOC103694176, Katnal2, Adamts14, Lrrc75b, Rhof, Nxpe5, Msi1
77	ENSRNOG00000069051	409	Ptgdr2, Gpr4, Prss23, Avpi1, Arntl, Med10, Ube2ql1, Sct, Kcnq1, Stx11, Rin1, Sytl2, Zfp541, P2ry2, Nfkbib, Tcirg1, Gdpd4, Mrps12, Kcnk4, Ucp3, Tnfrsf22, Actn4, Hapln3, Prune2, Mfge8, Zfp551, Dhcr7, Themis, Nphs1, LOC681458, Zp1, Dmkn, Prdx5, Ptgir, Tex36, Vnn3, RGD1311946, Nkpd1, Zfp536, Ahrr, Gng3, Sbsn, Ostf1, Nmrk1, Adam12, Hpx, Pgam1, Nlrp10, Tub, Magel2, Taf13, Itga10, Plk2, Glrx, Pabpc4l, T…	69	Ptgdr2, Kcnq1, Zfp541, Zfp551, Themis, Zp1, Zfp536, Gng3, Magel2, Pabpc4l, Cenph, Vcan, Pcdh10, Depdc1, Gpr37, LOC500331, Nobox, Sox5, H1f8, Oip5, Crb2, Jph1, Kif2c, Pramef20, Raver2, Npr2, Clspn, Ptchd1, Npas3, Chga, Troap, Krt84, Espl1, Adgrb1, C2cd4c, Hepacam, Slc38a3, Scn3b, Gsta4, Ltf, Kif15, Scg2, ENSRNOG00000069312, Hjurp, Zfp39, Hist3h2ba, Slc47a2, Top2a, Brca1, Tex19.1, Kif14, LOC1025562…	340	Gpr4, Prss23, Avpi1, Arntl, Med10, Ube2ql1, Sct, Stx11, Rin1, Sytl2, P2ry2, Nfkbib, Tcirg1, Gdpd4, Mrps12, Kcnk4, Ucp3, Tnfrsf22, Actn4, Hapln3, Prune2, Mfge8, Dhcr7, Nphs1, LOC681458, Dmkn, Prdx5, Ptgir, Tex36, Vnn3, RGD1311946, Nkpd1, Ahrr, Sbsn, Ostf1, Nmrk1, Adam12, Hpx, Pgam1, Nlrp10, Tub, Taf13, Itga10, Plk2, Glrx, Tuft1, S1pr1, Snx7, Polr3g, Dhfr, Bhmt, Pdlim5, Frrs1, Sh3d19, Mocs2, Hsd3b2…
78	ENSRNOG00000069096	89	Mir202, Dact2, Mrgpre, Htatip2, Dbp, Wnt11, Utf1, Perp, Pcsk6, Adamts17, Enpp3, Plpp4, Anxa5, Cmya5, Ccno, Hcn1, Lrat, RGD1559714, ENSRNOG00000009610, Inmt, Lmo3, Cntn3, Fibin, Spint3, Eppin, Ly75, Aplnr, Slco5a1, Espn, Per3, Epb41l4b, Orm1, Sh3gl2, Fgf13, Dio3, Six4, Sptb, Plekhd1, Ttll8, Amh, Cthrc1, Ano4, Gpd1, Atp8b3, Loxl1, Apoa1, Robo3, Gldn, Minar1, Wnt10a, Olr1353, Dlgap1, Shisa9, Sez6, S…	49	Mir202, Mrgpre, Dbp, Wnt11, Utf1, Perp, Pcsk6, Adamts17, Plpp4, Ccno, Hcn1, Inmt, Lmo3, Cntn3, Spint3, Eppin, Ly75, Espn, Per3, Fgf13, Dio3, Six4, Sptb, Plekhd1, Amh, Ano4, Robo3, Gldn, Minar1, Wnt10a, Dlgap1, Shisa9, Myh1, RGD1564463, Capn8, Kcnk2, Grem2, Kit, Rasgef1b, Ddc, Cfap20dc, Slain1, Phyhip, Gap43, Insl3, Kcng4, Ctrb1, Btnl2, Rflna	40	Dact2, Htatip2, Enpp3, Anxa5, Cmya5, Lrat, RGD1559714, ENSRNOG00000009610, Fibin, Aplnr, Slco5a1, Epb41l4b, Orm1, Sh3gl2, Ttll8, Cthrc1, Gpd1, Atp8b3, Loxl1, Apoa1, Olr1353, Sez6, Sh3pxd2b, Trim80, Btnl9, Ablim2, Inpp5j, Sgcg, Unc5a, Ccdc74a, App, Slc25a15, Col4a2, Col4a1, Acaa2, Bean1, Plekhg4, Adamts14, Kl, Rn5-8s
79	ENSRNOG00000069144	166	Irx2, Mir202, Ldaf1, Dbp, Wnt11, Epm2a, Tmem86a, Perp, Bnip3, Ethe1, Loxl4, Hif3a, Igf2r, Slc22a6, Kiaa0408L, Soga3, Folr1, Pik3ap1, Vstm1, Nlrp4a, Atrnl1, Prdx3, Celsr2, Vtcn1, Fhip1a, Anxa5, S100a4, Plpp1, Rbm46, Dclk1, Sgms2, Elovl6, Slc16a4, Fam126a, Inmt, Lrtm2, Sema3d, Abcb1b, Dpp6, ENSRNOG00000070827, Galntl5, Cntn3, Nfs1, Ttn, Bbox1, Sptlc3, Flrt3, Trib3, Spint3, Eppin, Tox2, Ctsa, Fkbp1a…	78	Irx2, Mir202, Dbp, Wnt11, Epm2a, Perp, Hif3a, Nlrp4a, Celsr2, Fhip1a, Elovl6, Inmt, Lrtm2, Abcb1b, Dpp6, Cntn3, Ttn, Bbox1, Sptlc3, Flrt3, Spint3, Eppin, Tox2, Per3, Plxnb3, Bex2, S100g, Fgf13, Cnksr2, Dio3, Plekhd1, Mov10l1, Ano4, Krt84, Anxa13, ENSRNOG00000070877, Hepacam, Robo3, Pgr, Fam81a, RGD1559995, Minar1, Znf660, Wnt10a, Dlgap1, Trim58, Shisa9, Tcap, Bricd5, Hlf, Sox8, Myh1, Notum, Tekt3…	88	Ldaf1, Tmem86a, Bnip3, Ethe1, Loxl4, Igf2r, Slc22a6, Kiaa0408L, Soga3, Folr1, Pik3ap1, Vstm1, Atrnl1, Prdx3, Vtcn1, Anxa5, S100a4, Plpp1, Rbm46, Dclk1, Sgms2, Slc16a4, Fam126a, Sema3d, ENSRNOG00000070827, Galntl5, Nfs1, Trib3, Ctsa, Fkbp1a, Slco5a1, Mxra8, Epb41l4b, Orm1, Sh3gl2, Tmem255a, Phka1, Cldn2, Dgkk, Pygl, Avpr1a, Cthrc1, Amdhd1, Gpd1, Wnt10b, Hmbs, Lactb, Filip1, Vegfa, ENSRNOG000000374…
80	ENSRNOG00000069161	552	Ptgdr2, Prss23, Ptpn5, Klk13, Avpi1, Arntl, Med10, Ube2ql1, Apoe, Ldaf1, Sct, Kcnq1, Stx11, Rin1, Klk7, Sytl2, Cib1, Zfp541, P2ry2, Gdpgp1, Nfkbib, Tmem86a, Tcirg1, Ano5, ENSRNOG00000064437, Nlrp14, Ap2s1, Tgfb1, Bnip3, Aldh3b1, Gdpd4, Trpm1, Mrps12, Relt, Kcnk4, B3gnt8, Ucp3, Ethe1, Tnfrsf22, Actn4, Rtn2, Hapln3, Prune2, Mfge8, Zfp551, Dhcr7, Zp1, Dmkn, Prdx5, LOC100361913, Tex36, Dpf1, Vnn3, Pv…	153	Ptgdr2, Klk13, Apoe, Kcnq1, Klk7, Zfp541, Ano5, Nlrp14, Trpm1, Rtn2, Zfp551, Zp1, Dpf1, Tdrd1, Zfp536, Psd, Nlrp5, Cnnm1, Plekha7, Fads2, Dlg2, Pnma8c, Pabpc4l, Trpc4, Celsr2, Vcan, Kcnab1, Arhgef28, Psrc1, Pcdh10, Ccno, Bmpr1b, Ddit4l2, Depdc1, Gpr37, Lrtm2, LOC500331, ENSRNOG00000060843, ENSRNOG00000026675, Nobox, Sox5, H1f8, Rnf208, Kcna4, Ttn, Oip5, Sptlc3, Flrt3, Eppin, Phactr3, Edn3, Ass1, …	399	Prss23, Ptpn5, Avpi1, Arntl, Med10, Ube2ql1, Ldaf1, Sct, Stx11, Rin1, Sytl2, Cib1, P2ry2, Gdpgp1, Nfkbib, Tmem86a, Tcirg1, ENSRNOG00000064437, Ap2s1, Tgfb1, Bnip3, Aldh3b1, Gdpd4, Mrps12, Relt, Kcnk4, B3gnt8, Ucp3, Ethe1, Tnfrsf22, Actn4, Hapln3, Prune2, Mfge8, Dhcr7, Dmkn, Prdx5, LOC100361913, Tex36, Vnn3, Pvr, RGD1311946, Ahrr, Pik3ap1, Ostf1, Adam12, Atrnl1, Smpd1, Hpx, Pgam1, Nlrp10, Tub, Lek…
81	ENSRNOG00000069295	8	Apoc4, Tnc, Fmr1nb, ENSRNOG00000070877, Sh2d4b, Hspa1a, Elfn1, B3gnt4	2	Apoc4, ENSRNOG00000070877	6	Tnc, Fmr1nb, Sh2d4b, Hspa1a, Elfn1, B3gnt4
82	ENSRNOG00000069402	44	Mir202, Cnih2, Slc22a6, Psat1, Vstm1, Fabp4, Lrat, Abcb1b, Cntn3, Trib3, Tox2, Per3, Epb41l4b, Orm1, Fgf13, Dio3, Plekhd1, Avpr1a, Apoa1, Robo3, Wnt10a, Dlgap1, Igfals, Sez6, Btnl9, Inhbb, Ablim2, Cnga1, Akr1c13, Dcdc2, App, Slc25a15, Col4a2, Col4a1, Aadat, Camk2a, Il34, RGD1561777, Cbs, Bnip5, RT1-CE2, Kl, ENSRNOG00000043866, Rn5-8s	16	Mir202, Abcb1b, Cntn3, Tox2, Per3, Fgf13, Dio3, Plekhd1, Robo3, Wnt10a, Dlgap1, Inhbb, Dcdc2, Camk2a, Cbs, Bnip5	28	Cnih2, Slc22a6, Psat1, Vstm1, Fabp4, Lrat, Trib3, Epb41l4b, Orm1, Avpr1a, Apoa1, Igfals, Sez6, Btnl9, Ablim2, Cnga1, Akr1c13, App, Slc25a15, Col4a2, Col4a1, Aadat, Il34, RGD1561777, RT1-CE2, Kl, ENSRNOG00000043866, Rn5-8s
83	ENSRNOG00000069426	562	Prss23, Ptpn5, Klk13, Adamtsl3, Avpi1, Arntl, Med10, Ptpre, Asrgl1, Mrgpre, Htatip2, Stx11, Rin1, Klk7, Cib1, Zfp541, Gdpgp1, ENSRNOG00000067308, Nfkbib, Tmem86a, Smoc2, Tcirg1, Ano5, Utf1, Nlrp14, Ap2s1, Tgfb1, Bnip3, Pcsk6, Adamts17, Trpm1, Nmb, B3gnt8, Alpk3, Ucp3, Ethe1, Actn4, Rtn2, Adgra1, ENSRNOG00000068667, Zfp551, Dhcr7, Zp1, Enpp3, Prdx5, LOC100361913, Igf2r, Dpf1, RGD1311946, Tdrd1, Ps…	236	Klk13, Adamtsl3, Ptpre, Mrgpre, Klk7, Zfp541, ENSRNOG00000067308, Smoc2, Ano5, Utf1, Nlrp14, Pcsk6, Adamts17, Trpm1, Alpk3, Rtn2, ENSRNOG00000068667, Zfp551, Zp1, Dpf1, Tdrd1, Psd, Nlrp5, Cnnm1, Plekha7, Nlrp4a, Acsm5, Fads2, Dlg2, Plpp4, Pnma8c, Foxo1, Trpc4, Sema5a, Celsr2, Vcan, Kcnab1, Abca4, Arhgef28, Psrc1, Gstm7, Pcdh10, Sycp1, Ccno, Cspg4b, Bmpr1b, Ddit4l2, Depdc1, Lrtm2, Lmo3, ENSRNOG000…	326	Prss23, Ptpn5, Avpi1, Arntl, Med10, Asrgl1, Htatip2, Stx11, Rin1, Cib1, Gdpgp1, Nfkbib, Tmem86a, Tcirg1, Ap2s1, Tgfb1, Bnip3, Nmb, B3gnt8, Ucp3, Ethe1, Actn4, Adgra1, Dhcr7, Enpp3, Prdx5, LOC100361913, Igf2r, RGD1311946, Ostf1, Adam12, Il27, Atrnl1, LOC120097921, LOC100910107, Smpd1, Pgam1, Nlrp10, Tub, Olr154, Lekr1, Vtcn1, Dhfr, Vav3, Serf1, Cmya5, Dclk2, Rbm46, Tpd52, RGD1563667, Dclk1, LOC100…
84	ENSRNOG00000069541	209	Ttyh1, Mir202, Adamtsl3, Ptpre, Asrgl1, Mrgpre, Htatip2, Epm2a, Smoc2, Utf1, Adamts17, ENSRNOG00000021484, Pnlip, Gsto2, Syt7, Fxyd5, Rnls, Enpp3, Fxyd7, Psat1, Atrnl1, Acsm5, Fads2, Plpp4, Cd19, Il7, Gpr88, Ca13, ENSRNOG00000062927, Arhgef28, Anxa5, Cmya5, Lrat, Slc16a4, Trpc3, Steap1, Asns, Grm8, Mest, Cpa2, Pclo, Dpp6, Tmem139, Lrig1, Hoxa4, Frmd5, Fibin, Fermt1, Emilin3, Trib3, Spint3, Ptrh1,…	87	Asrgl1, Htatip2, ENSRNOG00000021484, Pnlip, Fxyd5, Rnls, Enpp3, Psat1, Atrnl1, Il7, Gpr88, Ca13, ENSRNOG00000062927, Anxa5, Cmya5, Lrat, Slc16a4, Steap1, Asns, Tmem139, Fibin, Trib3, Ptrh1, Ntmt1, LOC120102087, Mmel1, Acot7, Epb41l4b, Nt5c1a, Cldn2, Plp2, Maged2, Plb1, Cgref1, Cthrc1, Gpd1, Atp8b3, Gamt, Loxl1, Apoa1, Angptl8, Anxa2, Hmbs, Col7a1, Rpp25, Vegfa, Hspd1, Hspe1, ENSRNOG00000050318, T…	122	Ttyh1, Mir202, Adamtsl3, Ptpre, Mrgpre, Epm2a, Smoc2, Utf1, Adamts17, Gsto2, Syt7, Fxyd7, Acsm5, Fads2, Plpp4, Cd19, Arhgef28, Trpc3, Grm8, Mest, Cpa2, Pclo, Dpp6, Lrig1, Hoxa4, Frmd5, Fermt1, Emilin3, Spint3, Sall4, Aif1l, Efcab8, Pamr1, LOC100125366, Fam131c, Per3, Aldh1b1, Tmeff1, Mfsd2a, Tox, Nr0b1, Mid1ip1, Chrdl1, Agtr2, S100g, Rtl9, Pwwp3b, Aff2, Msh2, Fshr, Crim1, Dio3, Prkar2b, Sostdc1, …
85	ENSRNOG00000069560	117	Habp2, Mctp2, Bnc1, Klk7, Lipe, ENSRNOG00000067308, Ano5, Gpha2, Cyp2b1, Pcsk6, Gdpd4, B3gnt8, Igf2r, Cnnm1, Trpc4, Psrc1, Cmya5, Gstm7, Dclk2, Sycp1, Hcn1, Nap1l5, ENSRNOG00000014312, Lmo3, ENSRNOG00000070827, Arntl2, Rnf208, Vegp2, Obp2a, Wfdc10a, Lrp1b, Stom, Phactr3, Sp5, Gata5, Efcab8, Tspy26, Pou3f1, Gabrr2, Dab1, Ctps1, Phka1, Armcx4, Bex4, Magee2, Baz1a, Six4, Sptssa, Tmem179, Chadl, Ttll…	45	Lipe, Gdpd4, B3gnt8, Igf2r, Cmya5, Dclk2, Nap1l5, ENSRNOG00000070827, Arntl2, Vegp2, Stom, Ctps1, Phka1, Armcx4, Baz1a, Ttll8, Rangap1, Scn8a, Rgl3, Bsn, Rora, Klhl30, Rnf11l2, Farp2, Npas2, Ttyh2, Cdr2l, Trim80, Klhdc8a, Adamts4, Lrrc8c, Rbm47, Clhc1, Unc5a, H1f4, C2cd2, ENSRNOG00000063843, Pcdh1, Rnaseh2a, Ciapin1, RT1-M1-4, Notch4, Clec4g, Nxpe5, Radil	72	Habp2, Mctp2, Bnc1, Klk7, ENSRNOG00000067308, Ano5, Gpha2, Cyp2b1, Pcsk6, Cnnm1, Trpc4, Psrc1, Gstm7, Sycp1, Hcn1, ENSRNOG00000014312, Lmo3, Rnf208, Obp2a, Wfdc10a, Lrp1b, Phactr3, Sp5, Gata5, Efcab8, Tspy26, Pou3f1, Gabrr2, Dab1, Bex4, Magee2, Six4, Sptssa, Tmem179, Chadl, Amhr2, Tmcc3, Ntn4, Dhh, Soat2, Cd3d, Cd3e, Cadm1, Gpr62, ENSRNOG00000069423, Gldn, Cd3g, Znf660, Slc6a20a, Igfbp5, Shisa9, …
86	ENSRNOG00000069594	14	Glyatl1, Tmem171, Reg1a, Rims4, Slc24a2, Shroom4, Elmod1, Cxcr2, Slc13a2, Fam83g, Pkp1, H2ac1, Crlf1, Bhlha15	0	NA	14	Glyatl1, Tmem171, Reg1a, Rims4, Slc24a2, Shroom4, Elmod1, Cxcr2, Slc13a2, Fam83g, Pkp1, H2ac1, Crlf1, Bhlha15
87	ENSRNOG00000069611	559	Ptgdr2, Gpr4, Prss23, Ptpn5, Mctp2, Klk13, Avpi1, Arntl, Med10, Ube2ql1, ENSRNOG00000063011, Apoc1, Apoe, Pnliprp2, Vstm2b, Hells, Sct, Kcnq1, Stx11, Rin1, Sytl2, Cib1, Zfp541, P2ry2, Gdpgp1, Nfkbib, Aig1, Tmem86a, Tcirg1, Ctsd, ENSRNOG00000064437, Nlrp14, Cyp2b1, Ap2s1, Gdpd4, Mrps12, Relt, Kcnk4, B3gnt8, LOC100911413, Zkscan2, Ucp3, Tnfrsf22, Actn4, Rtn2, Hapln3, Prune2, Mfge8, ENSRNOG000000686…	137	Ptgdr2, Mctp2, Klk13, ENSRNOG00000063011, Apoc1, Apoe, Vstm2b, Hells, Kcnq1, Zfp541, Nlrp14, Cyp2b1, Zkscan2, Rtn2, ENSRNOG00000068667, Zfp551, Zp1, Dpf1, Tdrd1, Zfp536, Nlrp5, Cnnm1, Plekha7, Cyb5r2, Pnma8c, Naaladl2, Pabpc4l, Trpc4, Vcan, Kcnab1, Abca4, Psrc1, Gstm7, Pcdh10, Sycp1, Ddit4l2, Depdc1, Gpr37, Plxna4, LOC500331, Nobox, Sox5, H1f8, Rnf208, Kcna4, Rad21l1, Phactr3, Edn3, Ass1, Adal, G…	422	Gpr4, Prss23, Ptpn5, Avpi1, Arntl, Med10, Ube2ql1, Pnliprp2, Sct, Stx11, Rin1, Sytl2, Cib1, P2ry2, Gdpgp1, Nfkbib, Aig1, Tmem86a, Tcirg1, Ctsd, ENSRNOG00000064437, Ap2s1, Gdpd4, Mrps12, Relt, Kcnk4, B3gnt8, LOC100911413, Ucp3, Tnfrsf22, Actn4, Hapln3, Prune2, Mfge8, Dhcr7, LOC681458, Dmkn, Prdx5, LOC100361913, Tex36, Pvr, RGD1311946, Nkpd1, Ahrr, Lrrc51, Sbsn, Adam12, Scd, ENSRNOG00000064803, Smp…
88	ENSRNOG00000069674	685	Irx2, Ttyh1, Zfp61, Ptgdr2, Gde1, Mir202, Prss23, Ptpn5, Mctp2, Klk13, Gna14, Adamtsl3, Avpi1, Arntl, Abcc6, Med10, Ptpre, Asrgl1, Ube2ql1, Apoe, Mrgpre, Htatip2, Ldaf1, Kcnq1, Stx11, Rin1, Klk7, Dbp, Cib1, Wnt11, Epm2a, Zfp541, P2ry2, Gdpgp1, Lipe, ENSRNOG00000067308, Nfkbib, Tmem86a, Smoc2, Ano5, Utf1, Gpha2, Perp, Ap2s1, Tgfb1, Bnip3, Pcsk6, Adamts17, Trpm1, Nmb, B3gnt8, Alpk3, ENSRNOG00000021…	323	Irx2, Ttyh1, Zfp61, Ptgdr2, Mir202, Mctp2, Klk13, Gna14, Adamtsl3, Abcc6, Ptpre, Apoe, Mrgpre, Kcnq1, Klk7, Dbp, Wnt11, Epm2a, Zfp541, ENSRNOG00000067308, Smoc2, Ano5, Utf1, Gpha2, Perp, Pcsk6, Adamts17, Trpm1, Alpk3, Rtn2, Ptprcap, Gsto2, Zfp551, Chst8, Dpf1, Tdrd1, Fxyd7, Zfp536, Sox6, Psd, Nlrp5, Plekha7, Nlrp4a, Acsm5, Fads2, Dlg2, Plpp4, Cyb5r2, Pnma8c, Foxo1, Trpc4, Sema5a, Celsr2, Vcan, Kc…	362	Gde1, Prss23, Ptpn5, Avpi1, Arntl, Med10, Asrgl1, Ube2ql1, Htatip2, Ldaf1, Stx11, Rin1, Cib1, P2ry2, Gdpgp1, Lipe, Nfkbib, Tmem86a, Ap2s1, Tgfb1, Bnip3, Nmb, B3gnt8, ENSRNOG00000021484, Ethe1, Actn4, Adgra1, Prune2, Loxl4, Fxyd5, Dhcr7, Rnls, Enpp3, Prdx5, LOC100361913, Igf2r, Vnn3, Pvr, Kiaa0408L, Soga3, Pik3ap1, Ostf1, Adam12, Atrnl1, LOC100910107, Prdx3, Pgam1, Nlrp10, Tub, Lekr1, Ca13, Vtcn1,…
89	ENSRNOG00000069705	50	Vstm2b, Aig1, Oca2, Zkscan2, Nkain2, Trdn, Ascl3, Trpc3, RGD1563231, Tmem72, ENSRNOG00000065655, Trim63, Sit1, Foxp3, RGD1565862, LOC299190, Bcl11b, Vipr2, E2f7, RGD1561648, Ascl4, Ky, Cxcr6, Ecel1, Crhr1, Pipox, Itk, Epop, Alox15, Unc45b, Gpr37l1, Tmem163, Crb1, Olr1619, Slitrk6, Pebp4, Plau, Msx2, RGD1563601, Map3k13, Ncam2, ENSRNOG00000046132, Enpp6, Dtna, Spry4, Neto1, Cd226, Srrm3, Chst12, G…	12	Aig1, Ascl3, ENSRNOG00000065655, Foxp3, LOC299190, Vipr2, Epop, Alox15, Msx2, RGD1563601, Spry4, Chst12	38	Vstm2b, Oca2, Zkscan2, Nkain2, Trdn, Trpc3, RGD1563231, Tmem72, Trim63, Sit1, RGD1565862, Bcl11b, E2f7, RGD1561648, Ascl4, Ky, Cxcr6, Ecel1, Crhr1, Pipox, Itk, Unc45b, Gpr37l1, Tmem163, Crb1, Olr1619, Slitrk6, Pebp4, Plau, Map3k13, Ncam2, ENSRNOG00000046132, Enpp6, Dtna, Neto1, Cd226, Srrm3, Grid2ip
90	ENSRNOG00000070022	627	Ptgdr2, Prss23, Ptpn5, Klk13, Adamtsl3, Avpi1, Arntl, Med10, Ube2ql1, Apoe, Vstm2b, Sct, Kcnq1, Stx11, Rin1, Sytl2, Cib1, Zfp541, P2ry2, Gdpgp1, Nfkbib, Aig1, Tmem86a, Tcirg1, Nlrp14, Ap2s1, Tgfb1, Bnip3, Trpm1, Mrps12, Relt, Kcnk4, Itgad, Ticrr, B3gnt8, Zkscan2, Ucp3, Ethe1, Tnfrsf22, Actn4, Rtn2, Hapln3, Prune2, Mfge8, ENSRNOG00000068667, Gsto2, Zfp551, Dhcr7, Themis, Chst8, Zp1, Dmkn, Prdx5, L…	434	Prss23, Ptpn5, Avpi1, Arntl, Med10, Ube2ql1, Sct, Stx11, Rin1, Sytl2, Cib1, P2ry2, Gdpgp1, Nfkbib, Aig1, Tmem86a, Tcirg1, Ap2s1, Tgfb1, Bnip3, Mrps12, Relt, Kcnk4, Itgad, B3gnt8, Ucp3, Ethe1, Tnfrsf22, Actn4, Hapln3, Prune2, Mfge8, Dhcr7, Dmkn, Prdx5, LOC100361913, Tex36, Pvr, RGD1311946, Ahrr, Sbsn, Ostf1, Adam12, Atrnl1, Scd, Smpd1, Hpx, Pgam1, Nlrp10, Tub, Lekr1, Taf13, Itga10, Glrx, Tuft1, S1…	193	Ptgdr2, Klk13, Adamtsl3, Apoe, Vstm2b, Kcnq1, Zfp541, Nlrp14, Trpm1, Ticrr, Zkscan2, Rtn2, ENSRNOG00000068667, Gsto2, Zfp551, Themis, Chst8, Zp1, Tdrd1, Zfp536, ENSRNOG00000066174, Sox6, Psd, Plekha7, Fads2, Dlg2, Pnma8c, Pabpc4l, Foxo1, Sema5a, Vcan, Kcnab1, Abca4, Arhgef28, Psrc1, Pcdh10, Sycp1, Cspg4b, Bmpr1b, Ddit4l2, Depdc1, Gpr37, Lrtm2, Plxna4, ENSRNOG00000026675, Nobox, Sox5, Art4, H1f8, …
91	ENSRNOG00000070152	94	Ptgdr2, Arntl, Ube2ql1, LOC100910848, Carns1, Ldaf1, Kcnq1, Zfp541, Prune2, Nphs1, Tex36, Ahrr, Lekr1, Itga10, Plk2, F2rl1, Polr3g, Pdlim5, Frrs1, Hsd3b2, Osmr, Ptgfr, Myo10, Sgms2, Hsd3b5, Mthfd2, Tmem140, Tigar, Apold1, Adamts9, Sord, Rasgrp1, ENSRNOG00000028910, Ttn, Slc25a25, Crb2, ENSRNOG00000031167, Muc15, Syt13, Crispld1, Slc30a2, Myom3, Nyx, Ston1, Mapk11, Apol2, Rnd1, Krt84, Wnt10b, Baal…	25	Ptgdr2, Kcnq1, Zfp541, Ttn, Crb2, Crispld1, Slc30a2, Krt84, C2cd4c, Slc38a3, Scn3b, Ltf, Slc6a20a, Scg2, Zfp39, Kcnj12, Cacng4, Slc47a2, LOC102556277, Nrsn1, Mastl, Polq, Gprin2, Chst4, LOC688390	69	Arntl, Ube2ql1, LOC100910848, Carns1, Ldaf1, Prune2, Nphs1, Tex36, Ahrr, Lekr1, Itga10, Plk2, F2rl1, Polr3g, Pdlim5, Frrs1, Hsd3b2, Osmr, Ptgfr, Myo10, Sgms2, Hsd3b5, Mthfd2, Tmem140, Tigar, Apold1, Adamts9, Sord, Rasgrp1, ENSRNOG00000028910, Slc25a25, ENSRNOG00000031167, Muc15, Syt13, Myom3, Nyx, Ston1, Mapk11, Apol2, Rnd1, Wnt10b, Baalc, Tmem65, Vom2r53, Ephx3, Mmp10, Mogat1, LOC102551819, Peca…
92	ENSRNOG00000070155	111	Habp2, Cd248, Fcgbp, LOC100910848, Lrp11, Bnc1, Ldaf1, Cpn1, Klk8, Klk7, ENSRNOG00000068605, Aldh3b1, Gda, Cdkn1c, Soga3, Folr1, Gng3, Rln1, Neurl1, Cenph, H3c13, Rhbg, Elapor1, Bnipl, Mab21l3, Ppm1l, Syn2, A2m, Galntl5, Tead4, Dysf, Fgd5, Adra2b, Frzb, Exd1, Crb2, Obp2a, Sp5, Col20a1, Pou3f1, Crispld1, Extl1, Myom3, C1qtnf12, Fbxo2, Fam151a, Kcnq4, Tmem255a, Gata1, Phka1, Mbnl3, Otc, Xpnpep2, Ac…	34	Habp2, Bnc1, Klk8, Klk7, ENSRNOG00000068605, Cdkn1c, Gng3, Cenph, Bnipl, Crb2, Obp2a, Sp5, Pou3f1, Crispld1, C1qtnf12, Fam151a, Gata1, Mbnl3, Pde1b, LOC300024, LOC120093684, Gpr62, Slc6a20a, Wnt9a, Prss32, Sox8, Ngfr, Krt15, Kmo, Tnfrsf19, Kcnma1, Elovl2, Hsd17b2, Prkar1b	77	Cd248, Fcgbp, LOC100910848, Lrp11, Ldaf1, Cpn1, Aldh3b1, Gda, Soga3, Folr1, Rln1, Neurl1, H3c13, Rhbg, Elapor1, Mab21l3, Ppm1l, Syn2, A2m, Galntl5, Tead4, Dysf, Fgd5, Adra2b, Frzb, Exd1, Col20a1, Extl1, Myom3, Fbxo2, Kcnq4, Tmem255a, Phka1, Otc, Xpnpep2, Ace2, Mtss1, Rgl3, Kif9, LOC100911489, Rufy4, Pecam1, Mpp3, Rbfox3, Tmem104, Chrnb1, Cd300lg, Rgs5, Adamts4, Tns3, Ogdh, Kctd4, Proser2, Thnsl1,…
93	ENSRNOG00000070376	570	Irx2, Zfp61, Ptgdr2, Prss23, Ptpn5, Klk13, Adamtsl3, Avpi1, Arntl, Abcc6, Med10, Ptpre, Asrgl1, Ube2ql1, Apoe, Mrgpre, Vstm2b, Stx11, Rin1, Sytl2, Cib1, Zfp541, P2ry2, Gdpgp1, Nfkbib, Aig1, Tmem86a, Smoc2, Tcirg1, Ano5, Ap2s1, Tgfb1, Bnip3, Adamts17, Trpm1, Nmb, Relt, Itgad, B3gnt8, Zkscan2, ENSRNOG00000021484, Ucp3, Ethe1, Actn4, Rtn2, Adgra1, Prune2, Ptprcap, ENSRNOG00000068667, Gsto2, Fxyd5, D…	343	Prss23, Ptpn5, Avpi1, Arntl, Med10, Asrgl1, Ube2ql1, Stx11, Rin1, Sytl2, Cib1, P2ry2, Gdpgp1, Nfkbib, Aig1, Tmem86a, Tcirg1, Ap2s1, Tgfb1, Bnip3, Nmb, Relt, Itgad, B3gnt8, ENSRNOG00000021484, Ucp3, Ethe1, Actn4, Adgra1, Prune2, Fxyd5, Dhcr7, Rnls, Dmkn, Prdx5, LOC100361913, Pvr, RGD1311946, Ahrr, Sbsn, Pik3ap1, Ostf1, Clcf1, Adam12, Atrnl1, Scd, Smpd1, Pgam1, Nlrp10, Tub, Lekr1, Taf13, S1pr1, Ca1…	227	Irx2, Zfp61, Ptgdr2, Klk13, Adamtsl3, Abcc6, Ptpre, Apoe, Mrgpre, Vstm2b, Zfp541, Smoc2, Ano5, Adamts17, Trpm1, Zkscan2, Rtn2, Ptprcap, ENSRNOG00000068667, Gsto2, Themis, Nlrp6, Chst8, Zp1, Zfp536, Sox6, Psd, Mamdc2, Plekha7, Crym, Acsm5, Fads2, Dlg2, Pnma8c, Pabpc4l, Foxo1, Celsr2, Vcan, Kcnab1, Arhgef28, Gstm7, Pcdh10, Sycp1, Ccno, Cspg4b, Ddit4l2, Lrtm2, Plxna4, Pclo, ENSRNOG00000026675, Nobox…
94	ENSRNOG00000070502	27	LOC685793, Ckm, Doc2a, Fgf3, LOC108348215, Pcsk1, S100a8, S100a9, Lrrc31, F2rl2, Alox5, Cfap61, Slc13a3, Bpifb4, Dhcr24, Ripply1, Lrriq1, Dlec1, Ccdc40, Tmem102, Etv4, Hsd17b7, Cfap99, Kcnrg, Pitx1, Cibar2, Tsnaxip1	0	NA	27	LOC685793, Ckm, Doc2a, Fgf3, LOC108348215, Pcsk1, S100a8, S100a9, Lrrc31, F2rl2, Alox5, Cfap61, Slc13a3, Bpifb4, Dhcr24, Ripply1, Lrriq1, Dlec1, Ccdc40, Tmem102, Etv4, Hsd17b7, Cfap99, Kcnrg, Pitx1, Cibar2, Tsnaxip1
95	ENSRNOG00000070554	54	Epm2a, Ticrr, Ethe1, Fxyd5, ENSRNOG00000066174, Dlg2, Fhip1a, Sema3d, Rep15, Actr3b, Art4, Sptlc3, Bmp2, Psmd14, Zfp385b, Jph1, Trpa1, Rasef, Cdkn2b, Clspn, Pcdh11x, Ezhip, Wnk3, Ptchd1, ENSRNOG00000068484, Tafa5, Snx31, Wnt10b, Adgrb1, Ccdc15, Tlr9, Ooep, ENSRNOG00000062997, LOC108349479, Cps1, Lonrf2, Cacng4, Slc13a5, LOC498300, Bend4, Ebpl, H1f6, Ryr2, Myh15, Slc51a, Angpt2, Unc5d, RGD1562699,…	17	Ethe1, Fxyd5, Sema3d, Rep15, Actr3b, Psmd14, Trpa1, Cdkn2b, Tafa5, Wnt10b, Tlr9, Ebpl, H1f6, Slc51a, RGD1562699, Maf, ENSRNOG00000056298	37	Epm2a, Ticrr, ENSRNOG00000066174, Dlg2, Fhip1a, Art4, Sptlc3, Bmp2, Zfp385b, Jph1, Rasef, Clspn, Pcdh11x, Ezhip, Wnk3, Ptchd1, ENSRNOG00000068484, Snx31, Adgrb1, Ccdc15, Ooep, ENSRNOG00000062997, LOC108349479, Cps1, Lonrf2, Cacng4, Slc13a5, LOC498300, Bend4, Ryr2, Myh15, Angpt2, Unc5d, Fanca, Ctnna3, Oas1h, Brca2
96	ENSRNOG00000070797	431	Habp2, Gde1, Mctp2, Klk13, Gna14, Cd248, Avpi1, Asrgl1, Fcgbp, ENSRNOG00000063011, Htatip2, Hells, Ldaf1, Kcnc3, Cpn1, Klk8, Klk7, ENSRNOG00000068605, Wnt11, Gdpgp1, Lipe, ENSRNOG00000067308, Nfkbib, Tmem86a, Scube2, Ano5, Ctsd, Pcsk6, Aldh3b1, Alpk3, Hamp, Zfp551, Gda, Chst8, Prdx5, Igf2r, Dpf1, Vnn3, Cnih2, Tdrd1, Vwa2, Cdkn1c, Nkain2, Zfp536, LOC688924, Kiaa0408L, Soga3, Folr1, Lrrc51, Nlrp5, …	167	Habp2, Mctp2, Klk13, Gna14, ENSRNOG00000063011, Hells, Klk8, Klk7, ENSRNOG00000068605, Wnt11, ENSRNOG00000067308, Scube2, Ano5, Pcsk6, Alpk3, Hamp, Zfp551, Chst8, Dpf1, Tdrd1, Vwa2, Cdkn1c, Nkain2, Zfp536, Nlrp5, Nlrp4a, Cyb5r2, Naaladl2, Cenph, Frem2, Sema5a, Vcan, Abca4, Psrc1, Cspg4b, Creb3l4, Bmpr1b, Depdc1, Ctnna2, Plxna4, Lmo3, Klf15, Sox5, Cntn3, ENSRNOG00000066660, Rnf208, Oip5, Flrt3, Wf…	264	Gde1, Cd248, Avpi1, Asrgl1, Fcgbp, Htatip2, Ldaf1, Kcnc3, Cpn1, Gdpgp1, Lipe, Nfkbib, Tmem86a, Ctsd, Aldh3b1, Gda, Prdx5, Igf2r, Vnn3, Cnih2, LOC688924, Kiaa0408L, Soga3, Folr1, Lrrc51, Scgb1c1, Ostf1, Nmrk1, Rln1, LOC100910107, Prdx3, Btbd16, Slc35g1, Pgam1, Nlrp10, Tub, Olr154, Olr155, Gnat2, H3c13, Vav3, Rhbg, Serf1, S100a4, Sh3d19, Mocs2, Elapor1, Plpp1, Rbm46, RGD1559714, Cmbl, Tlcd4, H3c13,…
97	ENSRNOG00000070930	177	Adamtsl3, Abcc6, Vstm2b, Aig1, Tgfb1, Itgad, Zkscan2, Ucp3, Rtn2, Ptprcap, Gsto2, LOC100361913, RGD1311946, Psd, Clcf1, Plekha7, Scd, Crym, Acsm5, Fads2, Pnma8c, Taf13, Foxo1, Ca13, Kcnab1, ENSRNOG00000062927, Sycp1, Ddit4l2, LOC100363268, Steap1, Asns, Akr1b7, Pclo, Actr3b, Clec2d2, Rab5if, Gss, Cd44, Kcna4, Rad21l1, Bmp2, Sdc4, Ptrh1, Fam102a, Aurka, Cebpb, Il1rn, Dhrs9, Aif1l, Map1a, ENSRNOG00…	86	Adamtsl3, Abcc6, Vstm2b, Zkscan2, Rtn2, Ptprcap, Gsto2, Psd, Plekha7, Crym, Acsm5, Fads2, Pnma8c, Foxo1, Kcnab1, Sycp1, Ddit4l2, Pclo, Kcna4, Rad21l1, Bmp2, Aif1l, ENSRNOG00000067752, Chst1, Pamr1, Tas1r1, Pramef20, Tmem245, Raver2, Tmeff1, Cavin4, Tox, Atp2b3, Rnf128, Mid1ip1, Mageb6b1, Pwwp3b, Fshr, Crim1, Mycn, Lratd1, Trib2, Bcl11b, RGD1564409, Endou, Plxnc1, Tmtc2, Ccn3, Lratd2, Megf11, ENSR…	91	Aig1, Tgfb1, Itgad, Ucp3, LOC100361913, RGD1311946, Clcf1, Scd, Taf13, Ca13, ENSRNOG00000062927, LOC100363268, Steap1, Asns, Akr1b7, Actr3b, Clec2d2, Rab5if, Gss, Cd44, Sdc4, Ptrh1, Fam102a, Aurka, Cebpb, Il1rn, Dhrs9, Map1a, Mmel1, Acot7, Ldlrad2, Frmpd1, Cdh17, Timp1, Foxp3, Plp2, Cgref1, Serpina1, Serpina11, Pdzrn4, Scx, Uhrf1bp1l, Tuba1c, Krt71, Fstl3, Col5a3, Anxa2, Mapk6, Rasgrf1, Rpp25, An…
98	ENSRNOG00000071003	471	Irx2, Ttyh1, Gde1, Ptpn5, Klk13, Gna14, Adamtsl3, Ptpre, Asrgl1, Ube2ql1, Mrgpre, Htatip2, Anpep, Cib1, Wnt11, Epm2a, Gdpgp1, Nfkbib, Tmem86a, Smoc2, Ano5, Ap2s1, Tgfb1, Bnip3, Nmb, Relt, Ticrr, Alpk3, ENSRNOG00000021484, Ethe1, Gsto2, Syt7, Fxyd5, Hif3a, Rnls, Chst8, Prdx5, LOC100361913, Igf2r, Dpf1, Vnn3, Fxyd7, Zfp536, ENSRNOG00000066174, Sox6, LOC688924, Kiaa0408L, Folr1, Pik3ap1, Ostf1, Plek…	233	Gde1, Ptpn5, Asrgl1, Ube2ql1, Htatip2, Anpep, Cib1, Gdpgp1, Nfkbib, Tmem86a, Ap2s1, Tgfb1, Bnip3, Nmb, Relt, ENSRNOG00000021484, Ethe1, Fxyd5, Rnls, Prdx5, LOC100361913, Igf2r, Vnn3, LOC688924, Kiaa0408L, Folr1, Pik3ap1, Ostf1, Atrnl1, Prdx3, Pgam1, Il7, Taf13, Gpr88, Ca13, ENSRNOG00000062927, Vav3, Serf1, Anxa5, S100a4, Cmya5, Plpp1, Rbm46, Cmbl, LOC100363268, H3c13, Slc16a4, Gask1b, Fam126a, St…	238	Irx2, Ttyh1, Klk13, Gna14, Adamtsl3, Ptpre, Mrgpre, Wnt11, Epm2a, Smoc2, Ano5, Ticrr, Alpk3, Gsto2, Syt7, Hif3a, Chst8, Dpf1, Fxyd7, Zfp536, ENSRNOG00000066174, Sox6, Plekha7, Olr118-ps, Acsm5, Fads2, Dlg2, Cd19, Magel2, Foxo1, Frem2, Sema5a, Celsr2, Vcan, Kcnab1, Fhip1a, Abca4, Arhgef28, ENSRNOG00000067100, Cspg4b, Creb3l4, Bmpr1b, Trpc3, ENSRNOG00000067229, Grm8, Mest, Lrtm2, Plxna4, Cpa2, Pclo…
99	ENSRNOG00000071119	384	Ptgdr2, Gpr4, Prss23, Ptpn5, Mctp2, Avpi1, Arntl, Abcc6, Med10, Ube2ql1, ENSRNOG00000063011, Apoc4, Apoc1, Apoe, Vstm2b, Sct, Kcnq1, Rin1, Sytl2, Zfp541, P2ry2, Aig1, Rab38, Bnip3, Gdpd4, Mrps12, Kcnk4, B3gnt8, Zkscan2, ENSRNOG00000021484, Tnfrsf22, Actn4, Prune2, Ptprcap, Mfge8, Themis, Prdx5, Tex36, Pvr, RGD1311946, Nkpd1, Zfp536, Sox6, Psd, Ahrr, Trdn, Sbsn, Pgam1, Tub, Lekr1, Pde4d, Taf13, Pl…	84	Ptgdr2, Mctp2, Abcc6, ENSRNOG00000063011, Apoc4, Apoc1, Apoe, Vstm2b, Kcnq1, Zfp541, Zkscan2, Ptprcap, Themis, Zfp536, Sox6, Psd, Trdn, Pabpc4l, Vcan, Pcdh10, Plxna4, Kcna4, Rad21l1, Pramef20, Raver2, ENSRNOG00000068796, Npr2, Cavin4, Rnf128, Zcchc18, Mageb6b1, Magee2, Map3k15, ENSRNOG00000067691, Dio2, Chadl, Gsdmd, Sox10, RGD1564409, LOC120093114, Soat2, C2cd4c, LOC120093684, Cd3d, Cd3e, Cadm1,…	300	Gpr4, Prss23, Ptpn5, Avpi1, Arntl, Med10, Ube2ql1, Sct, Rin1, Sytl2, P2ry2, Aig1, Rab38, Bnip3, Gdpd4, Mrps12, Kcnk4, B3gnt8, ENSRNOG00000021484, Tnfrsf22, Actn4, Prune2, Mfge8, Prdx5, Tex36, Pvr, RGD1311946, Nkpd1, Ahrr, Sbsn, Pgam1, Tub, Lekr1, Pde4d, Taf13, Plk2, Tuft1, Tmem171, S1pr1, Snx7, Polr3g, Bhmt, Tmigd3, Pdlim5, Frrs1, Sh3d19, Mocs2, Hsd3b2, Myo10, Hspa4l, Hsd3b5, Pex1, Pdk4, Hk2, Tsp…
100	ENSRNOG00000071185	540	Prss23, Klk13, Adamtsl3, Avpi1, Med10, Ptpre, Asrgl1, Mrgpre, Vstm2b, Stx11, Rin1, Sytl2, Cib1, Zfp541, Gdpgp1, Nfkbib, Aig1, Tmem86a, Smoc2, Tcirg1, Ano5, Nlrp14, Ap2s1, Tgfb1, Adamts17, Trpm1, Mrps12, Nmb, Relt, Itgad, Ticrr, B3gnt8, Alpk3, Zkscan2, Ucp3, Actn4, Rtn2, Hapln3, ENSRNOG00000068667, Zfp551, Fxyd5, Dhcr7, Chst8, Zp1, Dmkn, Prdx5, LOC100361913, RGD1311946, Tdrd1, Zfp536, ENSRNOG00000…	316	Prss23, Avpi1, Med10, Asrgl1, Stx11, Rin1, Sytl2, Cib1, Gdpgp1, Nfkbib, Aig1, Tmem86a, Tcirg1, Ap2s1, Tgfb1, Mrps12, Nmb, Relt, Itgad, B3gnt8, Ucp3, Actn4, Hapln3, Fxyd5, Dhcr7, Dmkn, Prdx5, LOC100361913, RGD1311946, LOC688924, Ostf1, Adam12, Il27, Scd, LOC120097921, LOC100910107, ENSRNOG00000064803, Smpd1, Pgam1, Nlrp10, Tub, Olr154, Taf13, Dhfr, ENSRNOG00000062927, Vav3, Bhmt, Serf1, Sh3d19, Dc…	224	Klk13, Adamtsl3, Ptpre, Mrgpre, Vstm2b, Zfp541, Smoc2, Ano5, Nlrp14, Adamts17, Trpm1, Ticrr, Alpk3, Zkscan2, Rtn2, ENSRNOG00000068667, Zfp551, Chst8, Zp1, Tdrd1, Zfp536, ENSRNOG00000066174, Psd, Nlrp5, Plekha7, Crym, Olr118-ps, Acsm5, Fads2, Dlg2, Pnma8c, Naaladl2, Plppr4, Foxo1, Sema5a, Vcan, Kcnab1, Abca4, Arhgef28, Psrc1, Pcdh10, Sycp1, Ccno, Bmpr1b, Ddit4l2, Depdc1, Gpr37, Lrtm2, Pclo, ENSRNO…
101	ENSRNOG00000071212	385	Ttyh1, Gde1, Mctp2, Klk13, Gna14, Adamtsl3, Cd248, Asrgl1, ENSRNOG00000063011, Mrgpre, Htatip2, Hells, ENSRNOG00000068605, Wnt11, Gdpgp1, Lipe, ENSRNOG00000067308, Nfkbib, Tmem86a, Ano5, Ap2s1, Pcsk6, Nmb, B3gnt8, Alpk3, Hamp, ENSRNOG00000068667, Zfp551, Gda, Chst8, Prdx5, Igf2r, Dpf1, Cnih2, Tdrd1, Fxyd7, Zfp536, LOC688924, Kiaa0408L, Soga3, Lrrc51, Nlrp5, Scgb1c1, Plekha7, Nlrp4a, Il27, LOC1009…	187	Ttyh1, Mctp2, Klk13, Gna14, Adamtsl3, ENSRNOG00000063011, Mrgpre, Hells, ENSRNOG00000068605, Wnt11, ENSRNOG00000067308, Ano5, Pcsk6, Alpk3, Hamp, ENSRNOG00000068667, Zfp551, Chst8, Dpf1, Tdrd1, Fxyd7, Zfp536, Nlrp5, Plekha7, Nlrp4a, Olr118-ps, Plpp4, Cd19, Cyb5r2, Naaladl2, Frem2, Sema5a, Vcan, Abca4, Arhgef28, Psrc1, Sycp1, Cspg4b, Trpc3, ENSRNOG00000067229, Tmem72, Plxna4, Lmo3, Klf15, Lrig1, S…	198	Gde1, Cd248, Asrgl1, Htatip2, Gdpgp1, Lipe, Nfkbib, Tmem86a, Ap2s1, Nmb, B3gnt8, Gda, Prdx5, Igf2r, Cnih2, LOC688924, Kiaa0408L, Soga3, Lrrc51, Scgb1c1, Il27, LOC100910107, ENSRNOG00000064803, Prdx3, Slc35g1, Olr154, Olr155, Olr157, Gnat2, Il7, H3c13, Vav3, Serf1, Anxa5, Cmya5, Dclk2, Plpp1, Rbm46, RGD1559714, Tlcd4, LOC100363268, H3c13, Ppm1l, Slc16a4, Hsd3b3, Gask1b, ENSRNOG00000009610, Fam126a…
102	MSTRG.10313	58	Mir202, Apoc4, Gpha2, Sorcs3, Olr35, Sox6, Hcn1, ENSRNOG00000014312, Klrk1, Gdf5, Fam131c, Tnc, ENSRNOG00000068796, Map3k15, ENSRNOG00000065552, ENSRNOG00000062500, Tmem179, Chadl, Gsdmd, Hmga2, Soat2, LOC120093525, Mal2, ENSRNOG00000070877, LOC300024, Cd3d, Cd3e, Cadm1, ENSRNOG00000069423, Plin5, ENSRNOG00000066520, Rnf11l2, Zap70, Bricd5, Skap1, Nags, Slamf1, Ddc, Plau, Elovl2, Cd96, Gsc2, Adam…	13	Gdf5, Tnc, ENSRNOG00000062500, LOC120093525, Rnf11l2, Nags, Adamts1, Comp, Pcdh1, Calb2, RT1-T24-1, Col18a1, B3gnt4	45	Mir202, Apoc4, Gpha2, Sorcs3, Olr35, Sox6, Hcn1, ENSRNOG00000014312, Klrk1, Fam131c, ENSRNOG00000068796, Map3k15, ENSRNOG00000065552, Tmem179, Chadl, Gsdmd, Hmga2, Soat2, Mal2, ENSRNOG00000070877, LOC300024, Cd3d, Cd3e, Cadm1, ENSRNOG00000069423, Plin5, ENSRNOG00000066520, Zap70, Bricd5, Skap1, Slamf1, Ddc, Plau, Elovl2, Cd96, Gsc2, Dsc1, Cdh1, ENSRNOG00000065633, Gnaz, Mpig6b, Ly6g6f, Ly6g6e, EN…
103	MSTRG.12581	505	Irx2, Zfp61, Ptgdr2, Prss23, Ptpn5, Klk13, Avpi1, Arntl, Abcc6, Med10, Ube2ql1, Apoc4, Apoc1, Apoe, Kcnq1, Stx11, Rin1, Dbp, Sytl2, Cib1, Zfp541, P2ry2, Nfkbib, Tmem86a, Tcirg1, Ano5, Gpha2, Tgfb1, Bnip3, Adamts17, Trpm1, Kcnk4, B3gnt8, ENSRNOG00000021484, Ucp3, Ethe1, Actn4, Rtn2, Adgra1, Prune2, Ptprcap, Loxl4, Gsto2, Dhcr7, Prdx5, LOC100361913, Igf2r, Pvr, RGD1311946, Sox6, Psd, Ahrr, Sbsn, Ma…	325	Prss23, Ptpn5, Avpi1, Arntl, Med10, Ube2ql1, Stx11, Rin1, Sytl2, Cib1, P2ry2, Nfkbib, Tmem86a, Tcirg1, Tgfb1, Bnip3, Kcnk4, B3gnt8, ENSRNOG00000021484, Ucp3, Ethe1, Actn4, Adgra1, Prune2, Loxl4, Dhcr7, Prdx5, LOC100361913, Igf2r, Pvr, RGD1311946, Ahrr, Sbsn, Pik3ap1, Clcf1, Adam12, Atrnl1, Pgam1, Nlrp10, Tub, Lekr1, Taf13, S1pr1, Ca13, Bhmt, Tmigd3, Pdlim5, Frrs1, Cmya5, Osmr, Rbm46, Myo10, Dclk1…	180	Irx2, Zfp61, Ptgdr2, Klk13, Abcc6, Apoc4, Apoc1, Apoe, Kcnq1, Dbp, Zfp541, Ano5, Gpha2, Adamts17, Trpm1, Rtn2, Ptprcap, Gsto2, Sox6, Psd, Mamdc2, Cnnm1, Plekha7, Acsm5, Fads2, Pnma8c, Pabpc4l, Trpc4, Celsr2, Vcan, Kcnab1, Arhgef28, Gstm7, Pcdh10, Sycp1, Ccno, Ddit4l2, Lrtm2, Plxna4, ENSRNOG00000014312, ENSRNOG00000026675, H1f8, Rnf208, Kcna4, Sptlc3, Flrt3, Rad21l1, Phactr3, Ly75, Edn3, Ass1, Gat…
104	MSTRG.12916	152	Mir202, Dact2, Ptpre, Asrgl1, Mrgpre, Htatip2, Dbp, Wnt11, Epm2a, Smoc2, Utf1, Perp, Adamts17, Rnls, Enpp3, Slc22a6, Psat1, Plpp4, Il7, Celsr2, Anxa5, Cmya5, Lrat, Abcb1b, Dpp6, Tmem139, Cntn3, Frmd5, Fibin, Fermt1, Trib3, Spint3, Tox2, RGD1561442, Gpat2, Ntmt1, Aif1l, Efcab8, Aplnr, Nkain1, LOC100125366, Per3, Frmd3, Epb41l4b, Sh3gl2, Mfsd2a, Tox, Nr0b1, Cldn2, Chrdl1, S100g, Fgf13, Maged2, Aff2…	84	Mir202, Ptpre, Mrgpre, Dbp, Wnt11, Epm2a, Smoc2, Utf1, Perp, Adamts17, Plpp4, Celsr2, Abcb1b, Dpp6, Cntn3, Frmd5, Fermt1, Spint3, Tox2, RGD1561442, Gpat2, Aif1l, Efcab8, LOC100125366, Per3, Frmd3, Mfsd2a, Tox, Nr0b1, Chrdl1, S100g, Fgf13, Aff2, Msh2, Dio3, Prkar2b, Sostdc1, Slc24a4, Serpina5, Sptb, Plekhd1, Nrbp2, Ano4, Robo3, Pgr, RGD1561444, Minar1, Wnt10a, Dlgap1, Wnt6, Inha, Shisa9, Havcr1, M…	68	Dact2, Asrgl1, Htatip2, Rnls, Enpp3, Slc22a6, Psat1, Il7, Anxa5, Cmya5, Lrat, Tmem139, Fibin, Trib3, Ntmt1, Aplnr, Nkain1, Epb41l4b, Sh3gl2, Cldn2, Maged2, Plb1, Cgref1, Cthrc1, Amdhd1, Gpd1, Atp8b3, Gamt, Loxl1, Apoa1, Angptl8, Anxa2, Hmbs, Col7a1, Vegfa, ENSRNOG00000037402, Olr1353, ENSRNOG00000050318, Tax1bp3, Igfals, Tpsab1, Sez6, Sh3pxd2b, Proca1, Sgcd, Btnl9, Batf3, Hsd11b1, Ablim2, Inpp5j,…
105	MSTRG.13181	249	Irx2, Zfp61, Mir202, Ptpn5, Adamtsl3, Arntl, Abcc6, Ptpre, Apoc4, Apoe, Dbp, P2ry2, Smoc2, Utf1, Gpha2, Perp, Bnip3, Adamts17, Trpm1, B3gnt8, ENSRNOG00000021484, Ethe1, Rtn2, Adgra1, Ptprcap, Loxl4, Gsto2, Pvr, Cadm4, Fxyd7, Sox6, Psd, Mamdc2, Clcf1, Atrnl1, Acsm5, Fads2, Pnma8c, Lekr1, Ca13, Tmigd3, Arhgef28, Cmya5, Gstm7, Sycp1, Hcn1, Ddit4l2, Steap1, Asns, Hk2, Lep, Plxna4, ENSRNOG00000014312,…	133	Irx2, Zfp61, Mir202, Adamtsl3, Abcc6, Ptpre, Apoc4, Apoe, Dbp, Smoc2, Utf1, Gpha2, Perp, Adamts17, Trpm1, Rtn2, Ptprcap, Gsto2, Fxyd7, Sox6, Psd, Mamdc2, Acsm5, Fads2, Pnma8c, Arhgef28, Gstm7, Sycp1, Hcn1, Ddit4l2, Plxna4, ENSRNOG00000014312, Dpp6, Frmd5, Kcna4, Efcab8, Chst1, Kcnb2, Gabrr2, Kif24, LOC100125366, Tas1r1, Fam131c, Raver2, ENSRNOG00000068796, Tmeff1, Cavin4, Mfsd2a, Tox, Atp2b3, Nr0…	116	Ptpn5, Arntl, P2ry2, Bnip3, B3gnt8, ENSRNOG00000021484, Ethe1, Adgra1, Loxl4, Pvr, Cadm4, Clcf1, Atrnl1, Lekr1, Ca13, Tmigd3, Cmya5, Steap1, Asns, Hk2, Lep, Actr3b, Adamts9, Gss, Itpripl1, Trib3, Agpat2, Klhl41, Ptrh1, Fam102a, Ntmt1, Cebpb, Map1a, Creb3l1, Slco5a1, Mmel1, Acot7, Tnc, Iffo2, Frmpd1, Nt5c1a, Cdh17, Timp1, Cldn2, Pgk1, Plp2, ENSRNOG00000022738, ENSRNOG00000062500, Cgref1, Serpina11…
106	MSTRG.1333	223	Gde1, Mctp2, Gna14, ENSRNOG00000063011, Htatip2, Hells, Klk8, ENSRNOG00000068605, Gdpgp1, Lipe, ENSRNOG00000067308, Oca2, Ano5, Ctsd, Pcsk6, Nmb, ENSRNOG00000068667, Sorcs3, Gda, Soga3, Lrrc51, Scgb1c1, ENSRNOG00000064803, Btbd16, Smpd1, Olr118-ps, Slc35g1, Cyb5r2, Olr154, Olr155, Olr157, Naaladl2, Gnat2, Frem2, Sema5a, Abca4, Psrc1, Dclk2, Elapor1, Plpp1, Cspg4b, Tlcd4, H3c13, Ppm1l, Trpc3, Fam1…	117	Gde1, Htatip2, Gdpgp1, Lipe, Ctsd, Nmb, Gda, Soga3, Lrrc51, Scgb1c1, ENSRNOG00000064803, Btbd16, Smpd1, Slc35g1, Olr154, Olr155, Olr157, Gnat2, Dclk2, Elapor1, Plpp1, Tlcd4, H3c13, Ppm1l, Fam126a, Bola3, Tmem40, Smkr1, Herc3, Nap1l5, Prkag2, Bcat1, Dysf, Fgd5, Dusp16, Adra2b, Lpin3, Bpifb2, ENSRNOG00000066958, LOC120102087, Fam167b, Slco5a1, H6pd, Stpg1, Ldlrad2, Tnfrsf9, Ttc39a, Ctps1, Ripply1, …	106	Mctp2, Gna14, ENSRNOG00000063011, Hells, Klk8, ENSRNOG00000068605, ENSRNOG00000067308, Oca2, Ano5, Pcsk6, ENSRNOG00000068667, Sorcs3, Olr118-ps, Cyb5r2, Naaladl2, Frem2, Sema5a, Abca4, Psrc1, Cspg4b, Trpc3, Tmem72, Lmo3, Klf15, Lrig1, Hoxa4, ENSRNOG00000066660, Wfdc10a, Lrp1b, Sall4, Sp5, ENSRNOG00000067752, Tspy26, Pou3f1, Espn, LOC100125366, C1qtnf12, Fam151a, Gpr143, Gata1, Egfl6, Bex4, Scml2,…
107	MSTRG.1346	30	Pnliprp2, Chrna7, LOC100911413, LOC499240, Pcsk1, S100a9, Tacr1, Clstn3, Clec12a, Cfap61, Ccdc187, Slc13a3, Dhcr24, ENSRNOG00000068626, Dlec1, Erfe, Ccl20, Ccdc40, Etv4, Map3k19, Nectin4, Txk, Cfap99, Kcnrg, LOC100911664, Tmem44, Cibar2, Pnpla1, Hpd, ENSRNOG00000069483	2	Pnpla1, ENSRNOG00000069483	28	Pnliprp2, Chrna7, LOC100911413, LOC499240, Pcsk1, S100a9, Tacr1, Clstn3, Clec12a, Cfap61, Ccdc187, Slc13a3, Dhcr24, ENSRNOG00000068626, Dlec1, Erfe, Ccl20, Ccdc40, Etv4, Map3k19, Nectin4, Txk, Cfap99, Kcnrg, LOC100911664, Tmem44, Cibar2, Hpd
108	MSTRG.14772	355	Gde1, Ckm, Gpr4, Avpi1, ENSRNOG00000063011, Hells, Kcnc3, Cpn1, ENSRNOG00000068605, Gdpgp1, Oca2, Rnf225, Ctsd, Aldh3b1, Mrps12, LOC100911413, Tnfrsf22, Zfp551, LOC681458, Gda, Ptgir, Vnn3, Vwa2, Cdkn1c, Nkain2, Zfp536, LOC688924, Lrrc51, Gng3, Nmrk1, Rln1, Smpd1, Olr118-ps, Hpx, Slc35g1, Nlrp10, Tub, Ric3, Cyb5r2, Olr154, Olr155, Olr157, Magel2, Naaladl2, Pabpc4l, Tuft1, Snx7, Cenph, Vcan, ENSRN…	86	ENSRNOG00000063011, Hells, ENSRNOG00000068605, Oca2, Zfp551, Vwa2, Cdkn1c, Nkain2, Zfp536, Gng3, Olr118-ps, Cyb5r2, Magel2, Naaladl2, Pabpc4l, Cenph, Vcan, Abca4, Psrc1, Cspg4b, Depdc1, Tmem72, LOC500331, Klf15, Sox5, Oip5, Adal, Pou3f1, Kif2c, Fam151a, Scml2, Rps6ka6, RGD1565862, ENSRNOG00000064007, Npas3, Sox10, LOC120093114, Amhr2, Troap, Pde1b, Espl1, ENSRNOG00000066139, LOC120093684, Khdc3, …	269	Gde1, Ckm, Gpr4, Avpi1, Kcnc3, Cpn1, Gdpgp1, Rnf225, Ctsd, Aldh3b1, Mrps12, LOC100911413, Tnfrsf22, LOC681458, Gda, Ptgir, Vnn3, LOC688924, Lrrc51, Nmrk1, Rln1, Smpd1, Hpx, Slc35g1, Nlrp10, Tub, Ric3, Olr154, Olr155, Olr157, Tuft1, Snx7, ENSRNOG00000069130, Dhfr, Rhbg, S100a8, S100a9, Sh3d19, Mocs2, Elapor1, Hsd3b2, ENSRNOG00000061379, Cmbl, Tlcd4, Ppm1l, Hsd3b3, Gask1b, F2rl2, Bola3, Pex1, Tacr1…
109	MSTRG.15404	196	Zfp61, Mir202, Adamtsl3, Ptpre, Mrgpre, Htatip2, Dbp, Wnt11, Smoc2, Ano5, Utf1, Perp, Adamts17, Trpm1, ENSRNOG00000021484, Loxl4, Rnls, Enpp3, Fxyd7, Psat1, Atrnl1, Acsm5, Fads2, Plpp4, Ca13, ENSRNOG00000062927, Anxa5, Cmya5, Sycp1, Hcn1, Lrat, Steap1, Asns, Pclo, Dpp6, Klrk1, Tmem139, Lrig1, Frmd5, Fibin, Fermt1, Trib3, Spint3, Gpat2, Ntmt1, Ly75, Aif1l, Efcab8, Map1a, Chst1, Nkain1, Slco5a1, Mm…	112	Zfp61, Mir202, Adamtsl3, Ptpre, Mrgpre, Dbp, Wnt11, Smoc2, Ano5, Utf1, Perp, Adamts17, Trpm1, Fxyd7, Acsm5, Fads2, Plpp4, Sycp1, Hcn1, Pclo, Dpp6, Klrk1, Lrig1, Frmd5, Fermt1, Spint3, Gpat2, Ly75, Aif1l, Efcab8, Chst1, LOC100125366, Fam131c, Per3, Frmd3, Tmeff1, Mfsd2a, Tox, Nr0b1, Mid1ip1, Chrdl1, Bex4, S100g, Fgf13, Pwwp3b, Msh2, Fshr, Dio3, Prkar2b, Sostdc1, Trib2, Serpina5, Six4, Sptb, Plekhd…	84	Htatip2, ENSRNOG00000021484, Loxl4, Rnls, Enpp3, Psat1, Atrnl1, Ca13, ENSRNOG00000062927, Anxa5, Cmya5, Lrat, Steap1, Asns, Tmem139, Fibin, Trib3, Ntmt1, Map1a, Nkain1, Slco5a1, Mmel1, Acot7, Epb41l4b, Sh3gl2, Nt5c1a, Cldn2, Maged2, ENSRNOG00000022738, Cgref1, Cthrc1, Amdhd1, Gpd1, Atp8b3, Gamt, Loxl1, Apoa1, Angptl8, Anxa2, Hmbs, Pgm3, Col7a1, Vegfa, Uxs1, Chchd2, ENSRNOG00000050318, Tax1bp3, Ig…
110	MSTRG.15606	579	Gde1, Gpr4, Prss23, Klk13, Gna14, Avpi1, Med10, Ube2ql1, ENSRNOG00000063011, Pnliprp2, Vstm2b, Hells, Stx11, Rin1, Sytl2, Cib1, Gdpgp1, Lipe, Chrna7, Nfkbib, Aig1, Tmem86a, Tcirg1, Ano5, Ctsd, ENSRNOG00000064437, Nlrp14, Ap2s1, Tgfb1, Aldh3b1, Gdpd4, Mrps12, Nmb, Relt, Kcnk4, Itgad, B3gnt8, LOC100911413, Zkscan2, Ucp3, Tnfrsf22, Actn4, Rtn2, Hapln3, ENSRNOG00000068667, Zfp551, Dhcr7, LOC681458, Z…	169	Klk13, Gna14, ENSRNOG00000063011, Vstm2b, Hells, Ano5, Nlrp14, Zkscan2, Rtn2, ENSRNOG00000068667, Zfp551, Zp1, Dpf1, Tdrd1, Zfp536, Nlrp5, Cnnm1, Plekha7, Olr118-ps, Cyb5r2, Pnma8c, Naaladl2, Pabpc4l, Cenph, Trpc4, Sema5a, Vcan, Kcnab1, Abca4, Arhgef28, Psrc1, Pcdh10, Sycp1, Ccno, Cspg4b, Bmpr1b, Depdc1, Tmem72, Plxna4, LOC500331, Nobox, Klf15, Sox5, H1f8, Rnf208, Kcna4, Flrt3, Sall4, Phactr3, Ed…	410	Gde1, Gpr4, Prss23, Avpi1, Med10, Ube2ql1, Pnliprp2, Stx11, Rin1, Sytl2, Cib1, Gdpgp1, Lipe, Chrna7, Nfkbib, Aig1, Tmem86a, Tcirg1, Ctsd, ENSRNOG00000064437, Ap2s1, Tgfb1, Aldh3b1, Gdpd4, Mrps12, Nmb, Relt, Kcnk4, Itgad, B3gnt8, LOC100911413, Ucp3, Tnfrsf22, Actn4, Hapln3, Dhcr7, LOC681458, Dmkn, Prdx5, LOC100361913, RGD1311946, LOC688924, Lrrc51, Ostf1, Adam12, Il27, Scd, LOC120097921, LOC100910…
111	MSTRG.16924	485	Irx2, Ptgdr2, Habp2, Gde1, Prss23, Ptpn5, Klk13, Cd248, Avpi1, Arntl, Med10, Ube2ql1, ENSRNOG00000063011, Apoc4, LOC100910848, Bnc1, Hells, Ldaf1, Cpn1, Kcnq1, Rin1, Klk7, Anpep, Sytl2, ENSRNOG00000068605, Zfp541, P2ry2, Gdpgp1, Tmem86a, Tcirg1, Bnip3, Aldh3b1, Gdpd4, Mrps12, Ethe1, Tnfrsf22, Actn4, Prune2, Zfp551, Dhcr7, Themis, Gda, Prdx5, Tex36, Igf2r, Dpf1, Vnn3, Pvr, Cdkn1c, Zfp536, Kiaa0408…	131	Irx2, Ptgdr2, Habp2, Klk13, ENSRNOG00000063011, Apoc4, Bnc1, Hells, Kcnq1, Klk7, ENSRNOG00000068605, Zfp541, Zfp551, Themis, Dpf1, Cdkn1c, Zfp536, Gng3, Nlrp4a, Cyb5r2, Magel2, Cenph, Vcan, Psrc1, Pcdh10, Bnipl, Cspg4b, Depdc1, Lrtm2, Plxna4, LOC500331, Klf15, Sox5, ENSRNOG00000066660, Rnf208, Ttn, Oip5, Flrt3, Crb2, Sp5, Pou3f1, Crispld1, Slc30a2, Zfp353, Raver2, Npr2, Slc26a7, Plxnb3, Bex2, Mbn…	354	Gde1, Prss23, Ptpn5, Cd248, Avpi1, Arntl, Med10, Ube2ql1, LOC100910848, Ldaf1, Cpn1, Rin1, Anpep, Sytl2, P2ry2, Gdpgp1, Tmem86a, Tcirg1, Bnip3, Aldh3b1, Gdpd4, Mrps12, Ethe1, Tnfrsf22, Actn4, Prune2, Dhcr7, Gda, Prdx5, Tex36, Igf2r, Vnn3, Pvr, Kiaa0408L, Soga3, Folr1, Ahrr, Scgb1a1, Pik3ap1, Ostf1, Nmrk1, Rln1, Adam12, Atrnl1, Prdx3, Hpx, Pgam1, Nlrp10, Tub, Lekr1, Itga10, Plk2, Vtcn1, F2rl1, Pol…
112	MSTRG.17017	202	Ttyh1, Ptpre, Mrgpre, Dbp, Epm2a, Smoc2, Utf1, Perp, Bnip3, Adamts17, Trpm1, Alpk3, Ethe1, Adgra1, Loxl4, Fxyd5, Hif3a, Rnls, Enpp3, Cadm4, Psd, Psat1, Pik3ap1, Adam12, Atrnl1, Fads2, Dlg2, Plpp4, Celsr2, Fhip1a, Arhgef28, Anxa5, Cmya5, Ccno, Dclk1, Elovl6, Slc16a4, Steap1, Inmt, Lrtm2, Sema3d, Abcb1b, Actr3b, Dpp6, ENSRNOG00000026675, Cntn3, Frmd5, Fibin, Ttn, Bbox1, Sptlc3, Flrt3, Trib3, Spint3…	107	Ttyh1, Ptpre, Mrgpre, Dbp, Epm2a, Smoc2, Utf1, Perp, Adamts17, Trpm1, Alpk3, Hif3a, Psd, Fads2, Dlg2, Plpp4, Celsr2, Fhip1a, Arhgef28, Ccno, Elovl6, Inmt, Lrtm2, Abcb1b, Dpp6, ENSRNOG00000026675, Cntn3, Frmd5, Ttn, Bbox1, Sptlc3, Flrt3, Spint3, Eppin, RGD1561442, Gpat2, Ly75, Efcab8, Zfp385b, Kcnb2, Eya1, Per3, Rasef, Mfsd2a, Tox, Pcdh11x, Chrdl1, S100g, Ezhip, Pwwp3b, Cnksr2, Aff2, Msh2, Fshr, D…	95	Bnip3, Ethe1, Adgra1, Loxl4, Fxyd5, Rnls, Enpp3, Cadm4, Psat1, Pik3ap1, Adam12, Atrnl1, Anxa5, Cmya5, Dclk1, Slc16a4, Steap1, Sema3d, Actr3b, Fibin, Trib3, Agpat2, Klhl41, Ntmt1, Psmd14, Trpa1, Nkain1, Acot7, Mxra8, Epb41l4b, Sh3gl2, Cldn2, Maged2, Cgref1, Tafa5, Cthrc1, Amdhd1, Gpd1, Prr13, Wnt10b, Atp8b3, Gamt, Loxl1, Apoa1, Angptl8, Anxa2, Hmbs, Filip1, ENSRNOG00000065187, Vegfa, Uxs1, ENSRNOG…
113	MSTRG.17027	326	Gde1, Ckm, Gpr4, Avpi1, ENSRNOG00000063011, Pnliprp2, Hells, ENSRNOG00000068605, Gdpgp1, Chrna7, Scube2, Tcirg1, Ctsd, ENSRNOG00000064437, Ap2s1, Aldh3b1, Mrps12, LOC100911413, Tnfrsf22, Hapln3, ENSRNOG00000068667, Zfp551, LOC681458, Gda, Ptgir, Dpf1, Tdrd1, Vwa2, Zfp536, LOC688924, Lrrc51, Nlrp5, Gng3, Nmrk1, Rln1, Il27, LOC100910107, Btbd16, Smpd1, Olr118-ps, Hpx, Slc35g1, Nlrp10, Tub, Ric3, Ol…	70	ENSRNOG00000063011, Hells, ENSRNOG00000068605, Scube2, ENSRNOG00000068667, Zfp551, Dpf1, Tdrd1, Vwa2, Zfp536, Nlrp5, Gng3, Olr118-ps, Naaladl2, Cenph, Vcan, Abca4, Psrc1, Bmpr1b, Depdc1, LOC500331, Sox5, Pou3f1, Kif2c, Fam151a, Bex1, Rps6ka6, ENSRNOG00000064007, Npas3, Tcl1a, Panx2, Sox10, LOC120093114, Amhr2, Troap, Pde1b, Espl1, ENSRNOG00000066139, Btg4, Khdc3, Bcl2l10, Spsb4, Kif15, Hjurp, Bar…	256	Gde1, Ckm, Gpr4, Avpi1, Pnliprp2, Gdpgp1, Chrna7, Tcirg1, Ctsd, ENSRNOG00000064437, Ap2s1, Aldh3b1, Mrps12, LOC100911413, Tnfrsf22, Hapln3, LOC681458, Gda, Ptgir, LOC688924, Lrrc51, Nmrk1, Rln1, Il27, LOC100910107, Btbd16, Smpd1, Hpx, Slc35g1, Nlrp10, Tub, Ric3, Olr154, Olr155, Olr157, Gnat2, Tuft1, Snx7, ENSRNOG00000069130, Dhfr, Serf1, S100a8, S100a9, Sh3d19, Mocs2, Elapor1, Hsd3b2, ENSRNOG0000…
114	MSTRG.19006	96	Stx11, Cib1, Epm2a, Scube2, Ticrr, Syt7, Fxyd5, Zp1, Dmkn, ENSRNOG00000066174, LOC688924, Dlg2, Plppr4, Foxo1, Kcnab1, Fhip1a, ENSRNOG00000067100, Ca14, Bmpr1b, Rep15, ENSRNOG00000067295, ENSRNOG00000060843, Art4, Bmp2, RGD1561442, ENSRNOG00000063189, Psmd14, Zfp385b, Jph1, Trpa1, Oog3, Rasef, Cdkn2b, Aldh1b1, Ndufs5, Clspn, Slc26a7, Pcdh11x, Bmp15, Ezhip, Wnk3, Ptchd1, Id2, Lratd1, Chga, ENSRNOG…	24	Stx11, Cib1, Fxyd5, Dmkn, LOC688924, Rep15, Psmd14, Trpa1, Cdkn2b, Ndufs5, Id2, Tafa5, Tlr9, Afmid, Ebpl, Akr1c3, Hist1h2bq, H1f6, Slc51a, Ltn1, RGD1562699, Podnl1, Lpcat2, ENSRNOG00000056298	72	Epm2a, Scube2, Ticrr, Syt7, Zp1, ENSRNOG00000066174, Dlg2, Plppr4, Foxo1, Kcnab1, Fhip1a, ENSRNOG00000067100, Ca14, Bmpr1b, ENSRNOG00000067295, ENSRNOG00000060843, Art4, Bmp2, RGD1561442, ENSRNOG00000063189, Zfp385b, Jph1, Oog3, Rasef, Aldh1b1, Clspn, Slc26a7, Pcdh11x, Bmp15, Ezhip, Wnk3, Ptchd1, Lratd1, Chga, ENSRNOG00000068484, Snx31, Adgrb1, Ccdc15, Dock3, Ooep, Spsb4, ENSRNOG00000062997, Col4…
115	MSTRG.2148	736	Irx2, Ttyh1, Gde1, Prss23, Ptpn5, Mctp2, Klk13, Gna14, Adamtsl3, Avpi1, Med10, Ptpre, Asrgl1, Ube2ql1, Mrgpre, Htatip2, Vstm2b, Hells, Stx11, Rin1, Sytl2, Cib1, Zfp541, Gdpgp1, Lipe, ENSRNOG00000067308, Nfkbib, Aig1, Tmem86a, Smoc2, Tcirg1, Ano5, Ctsd, Nlrp14, Ap2s1, Tgfb1, Bnip3, Adamts17, Trpm1, Mrps12, Nmb, Relt, Itgad, Ticrr, B3gnt8, Alpk3, Zkscan2, ENSRNOG00000021484, Ucp3, Actn4, Rtn2, Ptpr…	419	Gde1, Prss23, Ptpn5, Avpi1, Med10, Asrgl1, Ube2ql1, Htatip2, Stx11, Rin1, Sytl2, Cib1, Gdpgp1, Lipe, Nfkbib, Aig1, Tmem86a, Tcirg1, Ctsd, Ap2s1, Tgfb1, Bnip3, Mrps12, Nmb, Relt, Itgad, B3gnt8, ENSRNOG00000021484, Ucp3, Actn4, Fxyd5, Dhcr7, Rnls, Dmkn, Prdx5, LOC100361913, Igf2r, Vnn3, RGD1311946, LOC688924, Lrrc51, Ostf1, Adam12, Il27, Atrnl1, Scd, LOC120097921, LOC100910107, ENSRNOG00000064803, …	317	Irx2, Ttyh1, Mctp2, Klk13, Gna14, Adamtsl3, Ptpre, Mrgpre, Vstm2b, Hells, Zfp541, ENSRNOG00000067308, Smoc2, Ano5, Nlrp14, Adamts17, Trpm1, Ticrr, Alpk3, Zkscan2, Rtn2, Ptprcap, ENSRNOG00000068667, Gsto2, Zfp551, Chst8, Zp1, Dpf1, Tdrd1, Fxyd7, Zfp536, ENSRNOG00000066174, Sox6, Psd, Nlrp5, Plekha7, Crym, Olr118-ps, Acsm5, Fads2, Dlg2, Plpp4, Cd19, Cyb5r2, Pnma8c, Naaladl2, Pabpc4l, Foxo1, Frem2, …
116	MSTRG.4435	801	Irx2, Zfp61, Ptgdr2, Habp2, Gde1, Prss23, Ptpn5, Mctp2, Klk13, Gna14, Adamtsl3, Avpi1, Arntl, Abcc6, Med10, Ptpre, Asrgl1, Ube2ql1, ENSRNOG00000063011, Apoc4, Apoe, Bnc1, Mrgpre, Hells, Ldaf1, Kcnq1, Stx11, Rin1, Klk7, Dbp, Anpep, Sytl2, Cib1, Wnt11, Zfp541, P2ry2, Gdpgp1, Lipe, ENSRNOG00000067308, Nfkbib, Tmem86a, Smoc2, Tcirg1, Ano5, Gpha2, Perp, Ap2s1, Tgfb1, Bnip3, Pcsk6, Adamts17, Gdpd4, Trp…	335	Irx2, Zfp61, Ptgdr2, Habp2, Mctp2, Klk13, Gna14, Adamtsl3, Abcc6, Ptpre, ENSRNOG00000063011, Apoc4, Apoe, Bnc1, Mrgpre, Hells, Kcnq1, Klk7, Dbp, Wnt11, Zfp541, ENSRNOG00000067308, Smoc2, Ano5, Gpha2, Perp, Pcsk6, Adamts17, Trpm1, Alpk3, Rtn2, Ptprcap, Gsto2, Zfp551, Hif3a, Themis, Chst8, Dpf1, Tdrd1, Fxyd7, Zfp536, Sox6, Psd, Nlrp5, Mamdc2, Plekha7, Nlrp4a, Acsm5, Fads2, Dlg2, Plpp4, Cyb5r2, Pnma…	466	Gde1, Prss23, Ptpn5, Avpi1, Arntl, Med10, Asrgl1, Ube2ql1, Ldaf1, Stx11, Rin1, Anpep, Sytl2, Cib1, P2ry2, Gdpgp1, Lipe, Nfkbib, Tmem86a, Tcirg1, Ap2s1, Tgfb1, Bnip3, Gdpd4, Mrps12, Nmb, Relt, B3gnt8, ENSRNOG00000021484, Ucp3, Ethe1, Actn4, Prune2, Loxl4, Fxyd5, Dhcr7, Rnls, Prdx5, LOC100361913, Igf2r, Vnn3, Pvr, Kiaa0408L, Soga3, Folr1, Ahrr, Pik3ap1, Ostf1, Nmrk1, Adam12, Atrnl1, Prdx3, Smpd1, P…
117	MSTRG.5149	453	Prss23, Klk13, Avpi1, Med10, Stx11, Rin1, Sytl2, Cib1, Gdpgp1, Nfkbib, Aig1, Tmem86a, Tcirg1, Ano5, ENSRNOG00000064437, Nlrp14, Ap2s1, Tgfb1, Adamts17, Trpm1, Mrps12, Nmb, Relt, Kcnk4, Itgad, B3gnt8, Ucp3, Actn4, Rtn2, Hapln3, ENSRNOG00000068667, Zfp551, Dhcr7, Zp1, Dmkn, Prdx5, LOC100361913, RGD1311946, Tdrd1, LOC688924, Lrrc51, Nlrp5, Cnnm1, Plekha7, Adam12, Il27, Scd, LOC120097921, LOC10091010…	284	Prss23, Avpi1, Med10, Stx11, Rin1, Sytl2, Cib1, Gdpgp1, Nfkbib, Aig1, Tmem86a, Tcirg1, ENSRNOG00000064437, Ap2s1, Tgfb1, Mrps12, Nmb, Relt, Kcnk4, Itgad, B3gnt8, Ucp3, Actn4, Hapln3, Dhcr7, Dmkn, Prdx5, LOC100361913, RGD1311946, LOC688924, Lrrc51, Adam12, Il27, Scd, LOC120097921, LOC100910107, ENSRNOG00000064803, Smpd1, Pgam1, Nlrp10, Tub, Olr154, Olr155, S1pr1, Dhfr, Vav3, Sh3d19, Dclk2, ENSRNOG…	169	Klk13, Ano5, Nlrp14, Adamts17, Trpm1, Rtn2, ENSRNOG00000068667, Zfp551, Zp1, Tdrd1, Nlrp5, Cnnm1, Plekha7, Olr118-ps, Acsm5, Dlg2, Pnma8c, Naaladl2, Foxo1, Trpc4, Sema5a, Vcan, Kcnab1, Abca4, Arhgef28, Psrc1, Gstm7, Pcdh10, Sycp1, Ccno, Bmpr1b, Ddit4l2, Depdc1, ENSRNOG00000060843, ENSRNOG00000026675, Nobox, Sox5, H1f8, Kcna4, Flrt3, Emilin3, Bmp2, Gpat2, Phactr3, Edn3, Adal, Gata5, ENSRNOG0000006…
118	MSTRG.5534	269	Habp2, Gpr4, Mctp2, Avpi1, ENSRNOG00000063011, Apoc1, Bnc1, Ldaf1, Klk8, Klk7, ENSRNOG00000068605, Lipe, ENSRNOG00000067308, ENSRNOG00000064437, Cyp2b1, Aldh3b1, Gdpd4, Mrps12, Kcnk4, LOC100911413, Actn4, Zfp551, LOC681458, Gda, Tex36, Nkpd1, Cdkn1c, Soga3, Lrrc51, Gng3, Rln1, Slc35g1, Nlrp10, Tub, Ric3, Cyb5r2, Pde4d, Pabpc4l, S1pr1, Snx7, Trpc4, Vcan, ENSRNOG00000069130, Rhbg, Psrc1, Sh3d19, Mo…	188	Gpr4, Avpi1, Ldaf1, Lipe, ENSRNOG00000064437, Aldh3b1, Gdpd4, Mrps12, Kcnk4, LOC100911413, Actn4, LOC681458, Gda, Tex36, Nkpd1, Soga3, Lrrc51, Rln1, Slc35g1, Nlrp10, Tub, Ric3, Pde4d, S1pr1, Snx7, ENSRNOG00000069130, Rhbg, Sh3d19, Mocs2, Hsd3b2, Myo10, ENSRNOG00000047236, Ppm1l, Hsd3b3, Fam126a, Pex1, Tacr1, Pdk4, Syn2, Tspan12, Prkag2, Tead4, Slc6a6, Pzp, Dysf, Fgd5, Pcyox1, Snx10, Dusp16, Mgll,…	81	Habp2, Mctp2, ENSRNOG00000063011, Apoc1, Bnc1, Klk8, Klk7, ENSRNOG00000068605, ENSRNOG00000067308, Cyp2b1, Zfp551, Cdkn1c, Gng3, Cyb5r2, Pabpc4l, Trpc4, Vcan, Psrc1, Pcdh10, Bnipl, LOC500331, Rnf208, Obp2a, Lrp1b, Sp5, Tspy26, Pou3f1, C1qtnf12, Gata1, Mbnl3, Magee2, ENSRNOG00000067691, Sptssa, Panx2, Gsdmd, Sox10, Amhr2, Troap, Pde1b, Soat2, LOC300024, LOC120093684, Cd3d, Cadm1, Gpr62, ENSRNOG000…
119	MSTRG.7821	608	Ptgdr2, Prss23, Ptpn5, Klk13, Avpi1, Arntl, Med10, Ptpre, Ube2ql1, Apoe, Kcnq1, Stx11, Rin1, Sytl2, Cib1, Zfp541, P2ry2, Gdpgp1, Nfkbib, Aig1, Tmem86a, Tcirg1, Ano5, Nlrp14, Ap2s1, Tgfb1, Bnip3, Aldh3b1, Adamts17, Trpm1, Mrps12, Relt, Kcnk4, Itgad, Ticrr, B3gnt8, Ucp3, Ethe1, Tnfrsf22, Actn4, Rtn2, Adgra1, Hapln3, Prune2, Zfp551, Dhcr7, Chst8, Zp1, Dmkn, Prdx5, LOC100361913, Tex36, Dpf1, Vnn3, Pv…	196	Ptgdr2, Klk13, Ptpre, Apoe, Kcnq1, Zfp541, Ano5, Nlrp14, Adamts17, Trpm1, Ticrr, Rtn2, Zfp551, Chst8, Zp1, Dpf1, Tdrd1, Zfp536, ENSRNOG00000066174, Psd, Nlrp5, Cnnm1, Plekha7, Nlrp4a, Fads2, Dlg2, Pnma8c, Pabpc4l, Foxo1, Trpc4, Sema5a, Celsr2, Vcan, Kcnab1, Arhgef28, Psrc1, Pcdh10, Ccno, Cspg4b, Bmpr1b, Ddit4l2, Depdc1, Gpr37, Lrtm2, ENSRNOG00000060843, ENSRNOG00000026675, Nobox, Sox5, Art4, H1f8…	412	Prss23, Ptpn5, Avpi1, Arntl, Med10, Ube2ql1, Stx11, Rin1, Sytl2, Cib1, P2ry2, Gdpgp1, Nfkbib, Aig1, Tmem86a, Tcirg1, Ap2s1, Tgfb1, Bnip3, Aldh3b1, Mrps12, Relt, Kcnk4, Itgad, B3gnt8, Ucp3, Ethe1, Tnfrsf22, Actn4, Adgra1, Hapln3, Prune2, Dhcr7, Dmkn, Prdx5, LOC100361913, Tex36, Vnn3, Pvr, RGD1311946, LOC688924, Ahrr, Pik3ap1, Ostf1, Adam12, Atrnl1, Scd, LOC100910107, Smpd1, Hpx, Pgam1, Nlrp10, Tub…
120	MSTRG.9561	29	Rnf225, ENSRNOG00000068013, Crispld1, Extl1, Myom3, Ube2u, Fbxo2, Zcchc18, Map3k15, Fmr1nb, Acot4, Acot2, Tg, ENSRNOG00000070877, Cmtm6, RGD1564447, Fgf18, Fras1, Tnfrsf19, Elovl2, Retnlg, ENSRNOG00000061099, Sh2d4b, Cilp2, Kcnn2, ENSRNOG00000063575, Calb2, ENSRNOG00000026051, Hspa1a	10	ENSRNOG00000068013, Crispld1, Zcchc18, Map3k15, ENSRNOG00000070877, Fgf18, Fras1, Tnfrsf19, Elovl2, Kcnn2	19	Rnf225, Extl1, Myom3, Ube2u, Fbxo2, Fmr1nb, Acot4, Acot2, Tg, Cmtm6, RGD1564447, Retnlg, ENSRNOG00000061099, Sh2d4b, Cilp2, ENSRNOG00000063575, Calb2, ENSRNOG00000026051, Hspa1a
121	MSTRG.9597	223	Ceacam16, Ttyh1, Dact2, Adamtsl3, Ptpre, Asrgl1, Mrgpre, Htatip2, Wnt11, Epm2a, Smoc2, Ano5, Utf1, Perp, Pcsk6, Adamts17, Trpm1, Nmb, Pnlip, Enpp3, Psat1, Plekha7, Acsm5, Plpp4, Cd19, Il7, Gpr88, Ca13, Sema5a, Celsr2, ENSRNOG00000062927, Vav3, Arhgef28, Anxa5, Cmya5, Dclk2, Sycp1, Ccno, Lrat, RGD1563667, ENSRNOG00000009610, Asns, Mest, Pclo, Lpcat3, Lmo3, Dpp6, Tmem139, Lrig1, Hoxa4, Frmd5, Fibin…	123	Ttyh1, Adamtsl3, Ptpre, Mrgpre, Wnt11, Epm2a, Smoc2, Ano5, Utf1, Perp, Pcsk6, Adamts17, Trpm1, Plekha7, Acsm5, Plpp4, Cd19, Sema5a, Celsr2, Arhgef28, Sycp1, Ccno, Mest, Pclo, Lmo3, Dpp6, Lrig1, Hoxa4, Frmd5, Fermt1, Emilin3, Spint3, Eppin, Wfdc10a, RGD1561442, Gpat2, Aif1l, Efcab8, Accsl, Pamr1, LOC100125366, Per3, Frmd3, Tox, Gpr143, Nr0b1, Chrdl1, Agtr2, Bex4, Fgf13, Pwwp3b, Aff2, Msh2, Fshr, C…	100	Ceacam16, Dact2, Asrgl1, Htatip2, Nmb, Pnlip, Enpp3, Psat1, Il7, Gpr88, Ca13, ENSRNOG00000062927, Vav3, Anxa5, Cmya5, Dclk2, Lrat, RGD1563667, ENSRNOG00000009610, Asns, Lpcat3, Tmem139, Fibin, Neb, Arl5a, Ntmt1, LOC120102087, Aplnr, Nkain1, Slco5a1, Mmel1, Acot7, Epb41l4b, Sh3gl2, Zbtb8os, Cldn2, Plp2, Maged2, Plb1, Cgref1, Rangap1, Cthrc1, Gpd1, Atp8b3, Gamt, Loxl1, Apoa1, Angptl8, Hmbs, Pgm3, R…
122	MSTRG.9891	733	Irx2, Ttyh1, Habp2, Gde1, Prss23, Ptpn5, Mctp2, Klk13, Gna14, Adamtsl3, Cd248, Avpi1, Med10, Asrgl1, Ube2ql1, ENSRNOG00000063011, Mrgpre, Htatip2, Hells, Ldaf1, Cpn1, Stx11, Rin1, Klk7, Sytl2, Cib1, ENSRNOG00000068605, Wnt11, Epm2a, Zfp541, Gdpgp1, Lipe, ENSRNOG00000067308, Nfkbib, Tmem86a, Scube2, Tcirg1, Ano5, Ctsd, Ap2s1, Pcsk6, Aldh3b1, Mrps12, Nmb, Relt, Ticrr, B3gnt8, Alpk3, Tnfrsf22, Hamp,…	282	Irx2, Ttyh1, Habp2, Mctp2, Klk13, Gna14, Adamtsl3, ENSRNOG00000063011, Mrgpre, Hells, Klk7, ENSRNOG00000068605, Wnt11, Epm2a, Zfp541, ENSRNOG00000067308, Scube2, Ano5, Pcsk6, Ticrr, Alpk3, Hamp, ENSRNOG00000068667, Zfp551, Chst8, Zp1, Dpf1, Tdrd1, Vwa2, Nkain2, Zfp536, ENSRNOG00000066174, Sox6, Nlrp5, Plekha7, Nlrp4a, Olr118-ps, Plpp4, Cyb5r2, Magel2, Naaladl2, Cenph, Trpc4, Frem2, Sema5a, Celsr2…	451	Gde1, Prss23, Ptpn5, Cd248, Avpi1, Med10, Asrgl1, Ube2ql1, Htatip2, Ldaf1, Cpn1, Stx11, Rin1, Sytl2, Cib1, Gdpgp1, Lipe, Nfkbib, Tmem86a, Tcirg1, Ctsd, Ap2s1, Aldh3b1, Mrps12, Nmb, Relt, B3gnt8, Tnfrsf22, Fxyd5, Dhcr7, Gda, Prdx5, LOC100361913, Igf2r, Vnn3, LOC688924, Kiaa0408L, Soga3, Folr1, Lrrc51, Pik3ap1, Ostf1, Nmrk1, Rln1, Adam12, Il27, Atrnl1, LOC100910107, Prdx3, Smpd1, Slc35g1, Pgam1, Nl…
