# Supplementary material for: Molecular Action of Tamoxifen in the Ovaries of Rats with Mammary Neoplasia
Source: Int J Mol Sci. 2023 Oct 30;24(21):15767. doi: 10.3390/ijms242115767 (PMC10649132; doi:10.3390/ijms242115767)
Supplement: Supplementary file 1 [file ijms-24-15767-s001.zip › supplementary/Table S12.xlsx]

## Sheet: Table. S12
Supplementary Table S12. Functional enrichment analysis (GO) of the negatively correlated co-expressed trans-target genes predicted to be regulated by differentially expressed lncRNAs identified in the ovaries of tumor-bearing rats treated with tamoxifen
No.	GO term ID	Term category	Description	P-adjusted	Number of DEGs enriched to particular GO term	List of DEGs enriched to the particular GO term
1	GO:0006066	BP	alcohol metabolic process	5.1557123134931824e-5	36	Gde1, Apoc1, Lipe, Aldh3b1, Pnlip, Dhcr7, Smpd1, Dhfr, Plpp1, Lep, Lpcat3, Dysf, H6pd, G6pd, Plb1, Gpd1, Soat2, Rbp2, Fdx1, Plcd1, Cyp11a1, Idh1, Nfe2l1, Sphk1, Fdxr, Pctp, Inpp5j, Gch1, Ptk2b, Kcnma1, Akr1c2, Akr1c3, Sptlc1, Akr1c1, Star, Scarb1
2	GO:0010876	BP	lipid localization	9.561705369741037e-4	36	Apoc4, Apoc1, Ldaf1, Kcnq1, P2ry2, Nmb, Pnlip, Lep, Abcb1b, Lpcat3, Apold1, Dysf, Cptp, Cpt2, Plin2, Pomc, Tspo, Atp8b3, Anxa2, Rbp2, Plscr1, Rab11a, Plin5, Vapa, Vmp1, Proca1, Pctp, Tnfrsf11a, Igfbp3, Abcc4, Slc51a, Star, Slc10a2, Lipg, Scarb1, Pla2g1b
3	GO:0006869	BP	lipid transport	7.888748973653941e-4	33	Apoc4, Apoc1, Kcnq1, P2ry2, Nmb, Pnlip, Lep, Abcb1b, Lpcat3, Apold1, Cptp, Cpt2, Plin2, Pomc, Tspo, Atp8b3, Anxa2, Rbp2, Plscr1, Rab11a, Vapa, Vmp1, Proca1, Pctp, Tnfrsf11a, Igfbp3, Abcc4, Slc51a, Star, Slc10a2, Lipg, Scarb1, Pla2g1b
4	GO:0006631	BP	fatty acid metabolic process	0.003102056605355206	33	Apoc1, Lipe, Cyp2b1, Ucp3, Elovl6, Lep, Akr1b7, Prkag2, Mgll, Lpin3, Obp2a, Crat, Acot7, Cpt2, Decr1, Acot9, Acot4, Gpx1, Plin5, Nfe2l1, Sphk1, Ltc4s, Alox15, Oxsm, Echdc3, Akr1c2, Akr1c3, Akr1c1, Lipg, Acaa2, Tysnd1, Ggt1, Pla2g1b
5	GO:0001503	BP	ossification	0.004166538750187825	33	Wnt11, P2ry2, Tcirg1, Tgfb1, Sgms2, Lep, Snx10, Cebpb, Zmpste24, Gata1, Id2, Scx, Mapk11, Cthrc1, Wnt10b, Mtss1, Fstl3, Acp5, Ltf, Vegfa, Runx2, Pam16, Sh3pxd2b, Alox15, Tnfrsf11a, Areg, Igfbp3, Ptk2b, Hist1h2ao, Ucma, Cbs, Col13a1, Rflna
6	GO:0008202	BP	steroid metabolic process	2.669698584906564e-4	32	Apoc1, Lipe, Dhcr7, Smpd1, Hsd3b2, Hsd3b3, Hsd3b1, Lep, Lpcat3, Dhrs9, H6pd, Timp1, G6pd, Tspo, Soat2, Fdx1, Cyp11a1, Nfe2l1, Fdxr, Pctp, Hsd11b1, Ebpl, Kcnma1, Akr1c2, Akr1c12, Akr1c3, Akr1c1, Cbr1, Star, Slc10a2, Hsd17b2, Scarb1
7	GO:0006091	BP	generation of precursor metabolites and energy	0.01199159812092276	32	Bnip3, Pgam1, Lep, Prkag2, Slc2a6, Lexm, H6pd, Phka1, G6pd, Pgk1, Dlst, Pomc, Immp2l, Pygl, Gpd1, Fdx1, Coq10b, Chchd2, Idh1, LOC691137, Proca1, Hsd11b1, Ogdh, Pgam2, Dnajc15, Sucla2, Pcdh12, Ciapin1, Hkdc1, Aifm2, Cisd1, Vgf
8	GO:0030099	BP	myeloid cell differentiation	0.018628550707921816	30	Kcnq1, Cib1, Tcirg1, Tgfb1, Cdkn1c, Prdx3, F2rl1, Hsd3b1, Lep, Snx10, Cebpb, Cdkn2b, Alas2, Gata1, G6pd, Id2, Fstl3, Acp5, Anxa2, Plscr1, Vegfa, Nfe2l1, Nme1, Batf3, Tnfrsf11a, Pf4, Ptk2b, Gpr183, Sfxn1, Pilrb
9	GO:0001666	BP	response to hypoxia	0.03003056705817714	29	Chrna7, Tgfb1, Bnip3, Ucp3, Il7, Lep, Abcb1b, Apold1, Alas2, Pgk1, Dio3, Serpina1, Angptl4, Mmp3, Hmbs, Vegfa, Hspd1, Chchd2, Aldh3a1, Sod3, Igfbp3, Rgcc, Ptk2b, Loxl2, Kcnma1, Plat, Acaa2, Hp, Cbs
10	GO:0015711	BP	organic anion transport	0.014230534258536431	28	P2ry2, Nmb, Trpc4, Slc16a4, Lep, Slc4a5, Abcb1b, Il1rn, Slco5a1, Cptp, Ace2, Slc6a20a, Nfe2l1, Slc16a6, Slc9a3r1, Slc16a5, Proca1, Slc16a11, Kmo, Mpc2, Tnfrsf11a, Lrrc8c, Abcc4, Sfxn1, Slc17a3, Slc51a, Slc10a2, Pla2g1b
11	GO:0007584	BP	response to nutrient	0.0035268533083014355	27	Tgfb1, Ucp3, Hamp, Hsd3b1, A2m, Lep, Abcb1b, Cdkn2b, Tspo, Soat2, Acp5, Hmbs, Gpx1, Cyp11a1, Vegfa, Runx2, Ltc4s, Aldh3a1, Sftpc, Akr1c3, Adamts1, Star, Lipg, Ctrb1, Hp, Cbs, Gstt1
12	GO:0016042	BP	lipid catabolic process	0.004926224086134542	27	Apoc1, Lipe, Pnlip, Smpd1, Plpp1, Lep, Mgll, Lpin3, Obp2a, Crat, Acot7, Cpt2, Decr1, Plb1, Plcd1, Plin5, Idh1, Hsd11b1, Akr1c3, Pla1a, Cbr1, Enpp6, Lipg, Acaa2, Tysnd1, Scarb1, Pla2g1b
13	GO:0019216	BP	regulation of lipid metabolic process	0.018628550707921816	27	Apoc1, Tgfb1, Dhcr7, Vav3, Lep, Lpcat3, Prkag2, Obp2a, H6pd, Zmpste24, Id2, Bcl11b, Angptl4, Tspo, Angptl8, Lactb, Plin5, Idh1, Nfe2l1, Sphk1, Dnajc15, Ptk2b, Kcnma1, Akr1c3, Star, Tysnd1, Scarb1
14	GO:1904062	BP	regulation of cation transmembrane transport	0.02509860007682764	27	Kcnq1, Tcirg1, Tgfb1, Hamp, Fxyd5, Trdn, Homer1, Hcn1, Dysf, Stom, Fkbp1a, Ptpn3, G6pd, Ace2, Fgf13, Akap6, Tlr9, Thy1, Rasgrf1, Shisa9, P2rx5, Grin2c, Slc9a3r1, Vmp1, Ptk2b, Kcnn2, Rph3a
15	GO:0007548	BP	sex differentiation	0.02826989800403936	27	Mir202, Kcnq1, Hsd3b2, Hsd3b1, A2m, Lep, Nobox, Tox2, Cebpb, Gata1, Sdc1, Immp2l, Amh, Mmp19, Fstl3, Tlr9, Cyp11a1, Vegfa, Idh1, Ereg, Nefh, Akr1c3, Cbr1, Adamts1, Star, Sall1, Vgf
16	GO:0062197	BP	cellular response to chemical stress	0.039528052221926645	27	Bnip3, Aldh3b1, Prdx5, Prdx3, Dhfr, Hsd3b1, Gpr37, Dysf, Trpa1, G6pd, Mgat3, Tspo, Wnt10b, Mmp3, Gpx1, Chchd2, Nfe2l1, Sphk1, Lrrc8c, Nefh, Sod3, Gch1, Fancc, Akr1c3, Aifm2, Ggt1, Hspb1
17	GO:0042445	BP	hormone metabolic process	2.669698584906564e-4	26	Lipe, Pnlip, Dhcr7, Hsd3b2, Hsd3b3, Hsd3b1, Lep, Dhrs9, H6pd, Zmpste24, Atp6ap2, Slc16a2, Dio3, Plb1, Dio2, Rbp2, Fdx1, Cyp11a1, Hsd11b1, Kcnma1, Akr1c2, Akr1c3, Akr1c1, Star, Hsd17b2, Scarb1
18	GO:0072593	BP	reactive oxygen species metabolic process	2.669698584906564e-4	26	Tgfb1, Bnip3, Prdx5, Prdx3, F2rl1, Dhfr, Lep, Gadd45a, G6pd, Immp2l, Tspo, Acp5, Mmp3, Gpx1, Plin5, Hspd1, Sh3pxd2b, Sod3, Gch1, Ptk2b, Fancc, Akr1c3, Akr1c1, Cbr1, Hp, Cbs
19	GO:0006790	BP	sulfur compound metabolic process	0.006260690222274711	26	Ethe1, Elovl6, Gss, Nfs1, Acot7, Mtap, Acot9, G6pd, Dlst, Acot4, Gamt, Gsta4, Gpx1, Idh1, Nfe2l1, Mpc2, Ogdh, Sucla2, Oxsm, Acaa2, Ciapin1, Gstt3, Cbs, Ggt1, Gstt1, Chst12
20	GO:0008406	BP	gonad development	0.00888793599806008	26	Kcnq1, Hsd3b2, Hsd3b1, A2m, Lep, Nobox, Tox2, Cebpb, Gata1, Sdc1, Immp2l, Amh, Mmp19, Fstl3, Tlr9, Cyp11a1, Vegfa, Idh1, Ereg, Nefh, Akr1c3, Cbr1, Adamts1, Star, Sall1, Vgf
21	GO:0045137	BP	development of primary sexual characteristics	0.010909456371087043	26	Kcnq1, Hsd3b2, Hsd3b1, A2m, Lep, Nobox, Tox2, Cebpb, Gata1, Sdc1, Immp2l, Amh, Mmp19, Fstl3, Tlr9, Cyp11a1, Vegfa, Idh1, Ereg, Nefh, Akr1c3, Cbr1, Adamts1, Star, Sall1, Vgf
22	GO:0015849	BP	organic acid transport	0.014959830702540722	26	P2ry2, Nmb, Trpc4, Lep, Il1rn, Cpt2, Plin2, Slc16a2, Ace2, Rbp2, Slc6a20a, Nfe2l1, Slc9a3r1, Tmem104, Proca1, Slc16a11, Kmo, Mpc2, Tnfrsf11a, Lrrc8c, Abcc4, Sfxn1, Slc51a, Slc7a4, Slc10a2, Pla2g1b
23	GO:0044282	BP	small molecule catabolic process	0.015140782852416886	26	Asrgl1, Lipe, Aldh3b1, Gda, Lep, Bcat1, Lpin3, Obp2a, Crat, Acot7, Iffo2, Cpt2, Decr1, Dlst, Acot4, Plin5, Afmid, Kmo, Inpp5j, Akr1c3, Cbr1, Acaa2, Tysnd1, Cbs, Scarb1, Sdsl
24	GO:0060249	BP	anatomical structure homeostasis	0.019192570422929166	26	P2ry2, Tcirg1, Tgfb1, Hamp, Prdx5, Tub, Il7, Homer1, Snx10, Crb2, Map1a, Sh3gl2, Gata1, Scx, Acp5, Tlr9, Ctsh, Ltf, Vegfa, Tnfrsf11a, Ptk2b, Nkiras1, Ildr1, Ccdc66, Calb2, Hspb1
25	GO:0014074	BP	response to purine-containing compound	2.669698584906564e-4	25	Kcnq1, P2ry2, Hcn1, Hsd3b1, Fkbp1a, Trpa1, Gata1, Sdc1, Akap6, Gpd1, Wnt10b, Mmp19, Fdx1, Cyp11a1, Hspd1, Sphk1, P2rx5, Nme1, Aldh3a1, Areg, Ptk2b, Sftpc, Star, Plat, Vgf
26	GO:0046942	BP	carboxylic acid transport	0.009616671351471146	25	P2ry2, Nmb, Trpc4, Slc16a4, Lep, Abcb1b, Il1rn, Ace2, Slc6a20a, Nfe2l1, Slc16a6, Slc9a3r1, Slc16a5, Proca1, Slc16a11, Kmo, Mpc2, Tnfrsf11a, Lrrc8c, Abcc4, Sfxn1, Slc17a3, Slc51a, Slc10a2, Pla2g1b
27	GO:0044706	BP	multi-multicellular organism process	0.01813176523737177	25	Lipe, Tgfb1, Prdx3, Hsd3b1, Lep, Pzp, Adra2b, Il1rn, Timp1, Alas2, Ace2, Maged2, Mmp3, Cyp11a1, Vegfa, Sphk1, Vmp1, Sh3pxd2b, Tekt3, Kiss1, Igfbp3, Akr1c3, Kalrn, Cbs, Hspb1
28	GO:0001894	BP	tissue homeostasis	0.011275238102690856	24	Tcirg1, Tgfb1, Hamp, Prdx5, Tub, Il7, Homer1, Snx10, Crb2, Map1a, Sh3gl2, Gata1, Scx, Acp5, Tlr9, Ctsh, Ltf, Vegfa, Tnfrsf11a, Ptk2b, Nkiras1, Ildr1, Ccdc66, Hspb1
29	GO:0031960	BP	response to corticosteroid	0.02826989800403936	24	Cpn1, Tgfb1, Ucp3, Hsd3b2, Hsd3b3, Hsd3b1, A2m, Fibin, Il1rn, Trim63, Sdc1, Hmbs, Cyp11a1, Vegfa, Hspd1, Serpinf1, Aldh3a1, Areg, Sftpc, Kcnma1, Akr1c3, Star, Plat, Hp
30	GO:0046683	BP	response to organophosphorus	2.669698584906564e-4	23	Kcnq1, Hcn1, Hsd3b1, Gata1, Sdc1, Akap6, Gpd1, Wnt10b, Mmp19, Fdx1, Cyp11a1, Hspd1, Sphk1, P2rx5, Nme1, Aldh3a1, Areg, Ptk2b, Sftpc, Akr1c1, Star, Plat, Vgf
31	GO:0006575	BP	cellular modified amino acid metabolic process	2.669698584906564e-4	23	Ethe1, Vnn3, Dhfr, Lpcat3, Pcyox1, Gss, Bbox1, Crat, Cpt2, Slc16a2, G6pd, Dio3, Dio2, Gamt, Gsta4, Plscr1, Gpx1, Idh1, Nfe2l1, Gch1, Gstt3, Ggt1, Gstt1
32	GO:0009636	BP	response to toxic substance	0.022370666373781226	23	Prdx5, Prdx3, Dhfr, Hsd3b1, Asns, Abcb1b, Sdc1, Scn8a, Gsta4, Gpx1, Cyp11a1, Slc47a2, Ltc4s, Ddc, Sod3, Gch1, Fancc, Slc17a3, Star, Ctrb1, Hp, Mt1, Gstt1
33	GO:0051604	BP	protein maturation	0.035475187533751514	23	Cpn1, Anpep, Perp, LOC100910107, Tspan33, Lpcat3, Mmel1, Zmpste24, Atp6ap2, Pgk1, Immp2l, Lgmn, Angptl8, Anxa2, Ctsh, Il1r2, Plat, Sec11c, Hp, Notch4, Tysnd1, Ggt1, Tspan15
34	GO:0044703	BP	multi-organism reproductive process	0.036678210932277924	23	Lipe, Tgfb1, Prdx3, Hsd3b1, Lep, Pzp, Adra2b, Il1rn, Timp1, Alas2, Ace2, Maged2, Mmp3, Cyp11a1, Vegfa, Sphk1, Vmp1, Kiss1, Igfbp3, Akr1c3, Kalrn, Cbs, Hspb1
35	GO:0071241	BP	cellular response to inorganic substance	0.041802665167571015	23	Bnip3, Smpd1, Hsd3b1, Syt13, Trpa1, Id2, Lgmn, Tspo, Fstl3, Tlr9, Hmbs, Gsta4, Cyp11a1, Serpinf1, Nfe2l1, Alox15, Sftpc, Akr1c3, Star, Bcar1, Hsd17b2, Mt1, Rasal1
36	GO:0042180	BP	cellular ketone metabolic process	0.004122883641803067	22	Apoc1, Hsd3b1, Prkag2, Obp2a, Dhrs9, H6pd, Gpd1, Cyp11a1, Plin5, Coq10b, Nfe2l1, Fdxr, Afmid, Kmo, Kcnma1, Akr1c2, Akr1c3, Akr1c1, Cbr1, Star, Aifm2, Tysnd1
37	GO:0015850	BP	organic hydroxy compound transport	0.0168275520320709	22	Apoc1, Kcnq1, Chrna7, Pnlip, Lep, Abcb1b, Lpcat3, Syt13, Pomc, Tspo, Anxa2, Plcd1, Rab11a, Vapa, Igfbp3, Abcc4, Slc51a, Rab3a, Star, Slc10a2, Lipg, Scarb1
38	GO:0000302	BP	response to reactive oxygen species	0.019677018932525586	22	Bnip3, Ucp3, Prdx5, Prdx3, Dhfr, Hsd3b1, Gpr37, Trpa1, Sdc1, Gpx1, Cyp11a1, Hspd1, Sphk1, Areg, Sod3, Gch1, Ptk2b, Fancc, Akr1c3, Star, Hp, Hspb1
39	GO:0046394	BP	carboxylic acid biosynthetic process	0.026592748959936362	22	Apoc1, Dhfr, Elovl6, Asns, Bcat1, Mgll, Dhrs9, Acot7, Mtap, Gamt, Sphk1, Ltc4s, Alox15, Kmo, Oxsm, Akr1c3, Star, Lipg, Cbs, Ggt1, Sdsl, Pla2g1b
40	GO:0016053	BP	organic acid biosynthetic process	0.02823673946090974	22	Apoc1, Dhfr, Elovl6, Asns, Bcat1, Mgll, Dhrs9, Acot7, Mtap, Gamt, Sphk1, Ltc4s, Alox15, Kmo, Oxsm, Akr1c3, Star, Lipg, Cbs, Ggt1, Sdsl, Pla2g1b
41	GO:0007565	BP	female pregnancy	0.03333185390313092	22	Lipe, Tgfb1, Prdx3, Hsd3b1, Lep, Pzp, Adra2b, Il1rn, Timp1, Alas2, Ace2, Maged2, Mmp3, Cyp11a1, Vegfa, Sphk1, Vmp1, Kiss1, Igfbp3, Akr1c3, Cbs, Hspb1
42	GO:0051384	BP	response to glucocorticoid	0.03828225665309631	22	Cpn1, Tgfb1, Ucp3, Hsd3b2, Hsd3b3, Hsd3b1, A2m, Fibin, Il1rn, Trim63, Sdc1, Hmbs, Cyp11a1, Vegfa, Hspd1, Serpinf1, Aldh3a1, Areg, Sftpc, Star, Plat, Hp
43	GO:0016485	BP	protein processing	0.0168275520320709	21	Cpn1, Anpep, Perp, LOC100910107, Lpcat3, Mmel1, Zmpste24, Atp6ap2, Pgk1, Immp2l, Lgmn, Angptl8, Anxa2, Ctsh, Il1r2, Plat, Sec11c, Hp, Notch4, Tysnd1, Ggt1
44	GO:0044242	BP	cellular lipid catabolic process	0.011275238102690856	20	Apoc1, Lipe, Smpd1, Plpp1, Lep, Mgll, Lpin3, Obp2a, Crat, Acot7, Cpt2, Decr1, Plb1, Plin5, Idh1, Akr1c3, Lipg, Acaa2, Tysnd1, Scarb1
45	GO:0046395	BP	carboxylic acid catabolic process	0.01199159812092276	20	Asrgl1, Lipe, Lep, Bcat1, Lpin3, Obp2a, Crat, Acot7, Iffo2, Cpt2, Decr1, Dlst, Acot4, Plin5, Afmid, Kmo, Acaa2, Tysnd1, Cbs, Sdsl
46	GO:0016054	BP	organic acid catabolic process	0.012830809391623453	20	Asrgl1, Lipe, Lep, Bcat1, Lpin3, Obp2a, Crat, Acot7, Iffo2, Cpt2, Decr1, Dlst, Acot4, Plin5, Afmid, Kmo, Acaa2, Tysnd1, Cbs, Sdsl
47	GO:1901617	BP	organic hydroxy compound biosynthetic process	0.01605512777328941	20	Chrna7, Oca2, Dhcr7, Dhfr, Hsd3b1, Gpr37, Lep, Lpcat3, H6pd, G6pd, Plcd1, Cyp11a1, Sphk1, Alox15, Ddc, Gch1, Ptk2b, Akr1c3, Sptlc1, Star
48	GO:0071248	BP	cellular response to metal ion	0.027886157742550703	20	Bnip3, Smpd1, Hsd3b1, Syt13, Id2, Lgmn, Tspo, Fstl3, Tlr9, Hmbs, Gsta4, Cyp11a1, Serpinf1, Nfe2l1, Alox15, Akr1c3, Star, Hsd17b2, Mt1, Rasal1
49	GO:0051591	BP	response to cAMP	4.392919894951589e-4	19	Kcnq1, Hcn1, Hsd3b1, Gata1, Sdc1, Akap6, Gpd1, Wnt10b, Mmp19, Fdx1, Cyp11a1, Nme1, Aldh3a1, Areg, Ptk2b, Sftpc, Star, Plat, Vgf
50	GO:2000377	BP	regulation of reactive oxygen species metabolic process	0.004122883641803067	18	Tgfb1, Bnip3, F2rl1, Dhfr, Lep, Gadd45a, G6pd, Tspo, Acp5, Mmp3, Plin5, Hspd1, Gch1, Ptk2b, Akr1c3, Akr1c1, Cbr1, Hp
51	GO:0120254	BP	olefinic compound metabolic process	0.004926224086134542	18	Lipe, Cyp2b1, Pnlip, Hsd3b1, Mgll, Dhrs9, H6pd, Plb1, Rbp2, Gpx1, Cyp11a1, Sphk1, Alox15, Kcnma1, Akr1c2, Akr1c3, Akr1c1, Star
52	GO:0033273	BP	response to vitamin	0.00888793599806008	18	Tgfb1, Hamp, Hsd3b1, Lep, Abcb1b, Tspo, Acp5, Hmbs, Gpx1, Cyp11a1, Vegfa, Runx2, Ltc4s, Sftpc, Adamts1, Hp, Cbs, Gstt1
53	GO:0034754	BP	cellular hormone metabolic process	0.003102056605355206	17	Lipe, Pnlip, Hsd3b2, Hsd3b3, Hsd3b1, Dhrs9, Plb1, Rbp2, Cyp11a1, Hsd11b1, Kcnma1, Akr1c2, Akr1c3, Akr1c1, Star, Hsd17b2, Scarb1
54	GO:0006694	BP	steroid biosynthetic process	0.008034341822264906	17	Dhcr7, Hsd3b2, Hsd3b3, Hsd3b1, Lep, Lpcat3, H6pd, Timp1, G6pd, Tspo, Fdx1, Cyp11a1, Hsd11b1, Akr1c3, Star, Hsd17b2, Scarb1
55	GO:0015718	BP	monocarboxylic acid transport	0.002711095787758405	16	P2ry2, Nmb, Slc16a4, Lep, Abcb1b, Slc16a6, Slc9a3r1, Slc16a5, Proca1, Slc16a11, Mpc2, Tnfrsf11a, Abcc4, Slc51a, Slc10a2, Pla2g1b
56	GO:0016125	BP	sterol metabolic process	0.005811461193580583	16	Apoc1, Lipe, Dhcr7, Smpd1, Lep, Lpcat3, G6pd, Soat2, Fdx1, Cyp11a1, Nfe2l1, Fdxr, Pctp, Ebpl, Star, Scarb1
57	GO:1902652	BP	secondary alcohol metabolic process	0.009616671351471146	16	Apoc1, Lipe, Dhcr7, Smpd1, Lep, Lpcat3, G6pd, Soat2, Fdx1, Cyp11a1, Idh1, Nfe2l1, Fdxr, Pctp, Star, Scarb1
58	GO:0008585	BP	female gonad development	0.01199159812092276	16	Hsd3b1, A2m, Lep, Nobox, Tox2, Cebpb, Immp2l, Amh, Mmp19, Vegfa, Idh1, Ereg, Nefh, Cbr1, Adamts1, Vgf
59	GO:0046545	BP	development of primary female sexual characteristics	0.015646094078969643	16	Hsd3b1, A2m, Lep, Nobox, Tox2, Cebpb, Immp2l, Amh, Mmp19, Vegfa, Idh1, Ereg, Nefh, Cbr1, Adamts1, Vgf
60	GO:0110148	BP	biomineralization	0.029465599861390013	16	Wnt11, Tcirg1, Tgfb1, Sgms2, Lep, Snx10, Cebpb, Zmpste24, Gata1, Wnt10b, Mtss1, Fam20a, Alox15, Ptk2b, Ucma, Rflna
61	GO:0051592	BP	response to calcium ion	0.03003056705817714	16	Cyp2b1, Smpd1, Homer1, Hcn1, Hsd3b1, Ttn, Syt13, Sdc1, Lgmn, Plcd1, P2rx5, Alox15, Ptk2b, Kcnma1, Akr1c3, Rasal1
62	GO:0046660	BP	female sex differentiation	0.03472518046101138	16	Hsd3b1, A2m, Lep, Nobox, Tox2, Cebpb, Immp2l, Amh, Mmp19, Vegfa, Idh1, Ereg, Nefh, Cbr1, Adamts1, Vgf
63	GO:0001659	BP	temperature homeostasis	0.04086408526732785	16	Elovl6, Lep, Rheb, Cebpb, Il1rn, Cpt2, Decr1, Dio2, Wnt10b, Gpx1, Vegfa, Pth2r, Trpv2, Pctp, Tnfrsf11a, Ebf2
64	GO:0008203	BP	cholesterol metabolic process	0.00921058460865064	15	Apoc1, Lipe, Dhcr7, Smpd1, Lep, Lpcat3, G6pd, Soat2, Fdx1, Cyp11a1, Nfe2l1, Fdxr, Pctp, Star, Scarb1
65	GO:1905952	BP	regulation of lipid localization	0.03103411760746152	15	Apoc4, Apoc1, P2ry2, Lep, Abcb1b, Lpcat3, Plin2, Pomc, Tspo, Anxa2, Plin5, Tnfrsf11a, Igfbp3, Lipg, Scarb1
66	GO:0031214	BP	biomineral tissue development	0.04693298341970548	15	Wnt11, Tcirg1, Tgfb1, Sgms2, Lep, Snx10, Cebpb, Zmpste24, Gata1, Wnt10b, Mtss1, Fam20a, Alox15, Ptk2b, Rflna
67	GO:0034308	BP	primary alcohol metabolic process	0.006725473474387339	13	Gde1, Lipe, Aldh3b1, Pnlip, H6pd, Plb1, Gpd1, Rbp2, Cyp11a1, Kcnma1, Akr1c2, Akr1c3, Akr1c1
68	GO:0098754	BP	detoxification	0.035475187533751514	13	Prdx5, Prdx3, Dhfr, Gpx1, Slc47a2, Ltc4s, Sod3, Gch1, Fancc, Slc17a3, Hp, Mt1, Gstt1
69	GO:0034698	BP	response to gonadotropin	0.0015934734995733451	12	Hsd3b2, Hsd3b1, Asns, Tox2, Gata1, Id2, Fdx1, Cyp11a1, Akr1c3, Cbr1, Star, Plat
70	GO:0001676	BP	long-chain fatty acid metabolic process	0.03816231129053343	12	Lipe, Cyp2b1, Elovl6, Mgll, Acot7, Cpt2, Acot9, Acot4, Gpx1, Sphk1, Ltc4s, Alox15
71	GO:0042446	BP	hormone biosynthetic process	0.004122883641803067	11	Dhcr7, Hsd3b2, Hsd3b1, H6pd, Dio3, Dio2, Fdx1, Cyp11a1, Star, Hsd17b2, Scarb1
72	GO:0015918	BP	sterol transport	0.017606143165193773	11	Apoc1, Pnlip, Lep, Abcb1b, Lpcat3, Anxa2, Rab11a, Vapa, Star, Lipg, Scarb1
73	GO:0009062	BP	fatty acid catabolic process	0.04163596811391508	11	Lipe, Lep, Lpin3, Obp2a, Crat, Acot7, Cpt2, Decr1, Plin5, Acaa2, Tysnd1
74	GO:0006801	BP	superoxide metabolic process	0.012830809391623453	10	Tgfb1, F2rl1, Dhfr, Immp2l, Acp5, Sh3pxd2b, Sod3, Gch1, Fancc, Cbs
75	GO:0030301	BP	cholesterol transport	0.015140782852416886	10	Apoc1, Pnlip, Lep, Abcb1b, Lpcat3, Anxa2, Rab11a, Star, Lipg, Scarb1
76	GO:0006749	BP	glutathione metabolic process	0.0168275520320709	10	Ethe1, Gss, G6pd, Gsta4, Gpx1, Idh1, Nfe2l1, Gstt3, Ggt1, Gstt1
77	GO:0071320	BP	cellular response to cAMP	0.022370666373781226	10	Kcnq1, Hcn1, Hsd3b1, Gata1, Akap6, Gpd1, Wnt10b, Fdx1, Cyp11a1, Star
78	GO:0048168	BP	regulation of neuronal synaptic plasticity	0.02826989800403936	10	Rheb, Rasgrf1, Rab11a, Shisa9, Kalrn, Rab3a, Star, Kcnn2, Camk2a, Vgf
79	GO:0006637	BP	acyl-CoA metabolic process	0.041355554980399854	10	Elovl6, Acot7, Acot9, Dlst, Acot4, Mpc2, Ogdh, Sucla2, Oxsm, Acaa2
80	GO:0035383	BP	thioester metabolic process	0.041355554980399854	10	Elovl6, Acot7, Acot9, Dlst, Acot4, Mpc2, Ogdh, Sucla2, Oxsm, Acaa2
81	GO:0008207	BP	C21-steroid hormone metabolic process	0.004122883641803067	9	Hsd3b2, Hsd3b3, Hsd3b1, Dhrs9, Cyp11a1, Kcnma1, Akr1c2, Akr1c3, Akr1c1
82	GO:0061035	BP	regulation of cartilage development	0.039528052221926645	9	Tgfb1, Lep, Frzb, Scx, Runx2, Wnt9a, Loxl2, Maf, Rflna
83	GO:0009409	BP	response to cold	0.04693298341970548	9	Lipe, Chrna7, Ucp3, Trpa1, Dio2, Vegfa, Hspd1, Nfe2l1, Vgf
84	GO:0030728	BP	ovulation	0.005355811162906057	8	Hsd3b1, Lep, Immp2l, Mmp19, Ereg, Cbr1, Adamts1, Plat
85	GO:0032354	BP	response to follicle-stimulating hormone	0.005355811162906057	8	Hsd3b1, Asns, Gata1, Id2, Cyp11a1, Akr1c3, Star, Plat
86	GO:0006739	BP	NADP metabolic process	0.00888793599806008	8	Prdx5, Pgam1, H6pd, G6pd, Fdx1, Idh1, Fdxr, Hsd11b1
87	GO:0010288	BP	response to lead ion	0.0168275520320709	8	Hsd3b2, Hsd3b1, Alas2, Serpina1, Hmbs, Plscr1, Star, Hp
88	GO:0042462	BP	eye photoreceptor cell development	0.0168275520320709	8	Gnat2, Hcn1, Crb2, Bhlhe23, Dio3, Thy1, Vegfa, Ccdc66
89	GO:0140353	BP	lipid export from cell	0.04577708603696793	8	Kcnq1, P2ry2, Lep, Pomc, Tspo, Tnfrsf11a, Igfbp3, Abcc4
90	GO:0001754	BP	eye photoreceptor cell differentiation	0.049513392262159873	8	Gnat2, Hcn1, Crb2, Bhlhe23, Dio3, Thy1, Vegfa, Ccdc66
91	GO:0071372	BP	cellular response to follicle-stimulating hormone stimulus	0.008034341822264906	7	Hsd3b1, Gata1, Id2, Cyp11a1, Akr1c3, Star, Plat
92	GO:0120178	BP	steroid hormone biosynthetic process	0.019677018932525586	7	Dhcr7, Hsd3b2, Hsd3b1, Cyp11a1, Star, Hsd17b2, Scarb1
93	GO:0060219	BP	camera-type eye photoreceptor cell differentiation	0.022370666373781226	7	Gnat2, Hcn1, Crb2, Bhlhe23, Dio3, Thy1, Ccdc66
94	GO:1901661	BP	quinone metabolic process	0.02509860007682764	7	Coq10b, Fdxr, Akr1c2, Akr1c3, Akr1c1, Cbr1, Aifm2
95	GO:0071371	BP	cellular response to gonadotropin stimulus	0.027720892838269857	7	Hsd3b1, Gata1, Id2, Cyp11a1, Akr1c3, Star, Plat
96	GO:0030325	BP	adrenal gland development	0.029306483202859505	7	Wnt11, Cdkn1c, Hsd3b1, Tspo, Fstl3, Fdx1, Sall1
97	GO:0042398	BP	cellular modified amino acid biosynthetic process	0.029306483202859505	7	Dhfr, Gss, Bbox1, Gamt, Plscr1, Gch1, Ggt1
98	GO:0050892	BP	intestinal absorption	0.029306483202859505	7	Kcnq1, Hamp, Pnlip, Lep, Lpcat3, Gcnt3, Scarb1
99	GO:0033591	BP	response to L-ascorbic acid	0.004440807659541658	6	Hsd3b1, Lep, Acp5, Cyp11a1, Runx2, Hp
100	GO:0051156	BP	glucose 6-phosphate metabolic process	0.011275238102690856	6	Pgam1, H6pd, G6pd, Nfe2l1, Hsd11b1, Hkdc1
101	GO:0032371	BP	regulation of sterol transport	0.03849403221087239	6	Apoc1, Lep, Abcb1b, Lpcat3, Anxa2, Lipg
102	GO:0032374	BP	regulation of cholesterol transport	0.03849403221087239	6	Apoc1, Lep, Abcb1b, Lpcat3, Anxa2, Lipg
103	GO:0046549	BP	retinal cone cell development	0.0168275520320709	5	Gnat2, Hcn1, Crb2, Dio3, Thy1
104	GO:0042670	BP	retinal cone cell differentiation	0.02017646301947229	5	Gnat2, Hcn1, Crb2, Dio3, Thy1
105	GO:0071871	BP	response to epinephrine	0.02826989800403936	5	Kcnq1, Rnls, Akap6, Fdx1, Star
106	GO:0042448	BP	progesterone metabolic process	0.038097978243654934	5	Hsd3b1, Dhrs9, Akr1c2, Akr1c3, Akr1c1
107	GO:0048875	BP	chemical homeostasis within a tissue	0.038097978243654934	5	Tgfb1, Homer1, Ctsh, Vegfa, Nkiras1
108	GO:1902644	BP	tertiary alcohol metabolic process	0.041743143526744214	5	H6pd, Cyp11a1, Akr1c2, Akr1c3, Akr1c1
109	GO:0046459	BP	short-chain fatty acid metabolic process	0.03003056705817714	4	Crat, Acot9, Acot4, Oxsm
110	GO:0061370	BP	testosterone biosynthetic process	0.03003056705817714	4	Hsd3b1, Cyp11a1, Akr1c3, Star
111	GO:0006098	BP	pentose-phosphate shunt	0.04557891763635583	4	Pgam1, H6pd, G6pd, Hsd11b1
112	GO:0071872	BP	cellular response to epinephrine stimulus	0.04557891763635583	4	Kcnq1, Akap6, Fdx1, Star
113	GO:0016324	CC	apical plasma membrane	0.0010360375307670925	33	Kcnq1, Cib1, P2ry2, Chrna7, Tcirg1, Enpp3, Plpp1, Slc4a5, Abcb1b, Crb2, Atp6v0d2, Trpa1, Atp6ap2, Slc16a2, Ace2, Plb1, Anxa13, Tlr9, Thy1, Slc6a20a, Slc9a3r1, Cd300lg, Kiss1, Atp12a, Abcc4, Kcnma1, Slc17a3, Atp4b, Lzts1, Atp6v1b2, Slc10a2, Naglt1, Scarb1
114	GO:0030141	CC	secretory granule	0.006260690222274711	31	Kcnq1, Klk8, Tcirg1, Tgfb1, Smpd1, Snx10, Chgb, Eppin, Pdyn, Pomc, Atp8b3, Fstl3, Ctsh, Ltf, Vegfa, Hspd1, Ica1l, Scg2, Kif1a, Tekt3, Pf4, Igfbp3, Abcc4, Sftpc, Pla1a, Rab3a, Plat, Rph3a, Vgf, Tmem184a, Pla2g1b
115	GO:0098857	CC	membrane microdomain	0.041149571459123936	27	Kcnq1, Lipe, Chrna7, Ctsd, Trpc4, Plpp1, Dysf, Sdc4, Stom, Sdcbp, Pgk1, Akap6, Tuba1c, Baalc, Anxa13, Anxa2, Thy1, Plcd1, Plscr1, Ephb1, Hspd1, Gpc1, Zap70, Slc9a3r1, Ptk2b, Kcnma1, Scarb1
116	GO:0019898	CC	extrinsic component of membrane	0.04693298341970548	23	Sytl2, Psd, Gng3, Nlrp10, Gnat2, Ctnna2, Snx10, Mgll, Fkbp1a, Cdh17, Anxa13, Anxa2, Snap91, Kif1a, Zap70, Pam16, Alox15, Inpp5j, Ptk2b, Farp1, Kalrn, Gnaz, Rph3a
117	GO:0030061	CC	mitochondrial crista	0.0168275520320709	5	Hsd3b1, Fdx1, Cyp11a1, Hspd1, Star
118	GO:0016616	MF	oxidoreductase activity, acting on the CH-OH group of donors, NAD or NADP as acceptor	4.392919894951589e-4	18	Hsd3b2, Hsd3b3, Hsd3b1, Akr1b7, Dhrs9, H6pd, G6pd, Sdr9c7, Gpd1, Idh1, Aldh3a1, Hsd11b1, Akr1c2, Akr1c12, Akr1c3, Akr1c1, Cbr1, Hsd17b2
119	GO:0016614	MF	oxidoreductase activity, acting on CH-OH group of donors	9.856728466837834e-4	18	Hsd3b2, Hsd3b3, Hsd3b1, Akr1b7, Dhrs9, H6pd, G6pd, Sdr9c7, Gpd1, Idh1, Aldh3a1, Hsd11b1, Akr1c2, Akr1c12, Akr1c3, Akr1c1, Cbr1, Hsd17b2
120	GO:1902936	MF	phosphatidylinositol bisphosphate binding	0.013819545697876003	13	Kcnq1, Sytl2, Hcn1, Anxa9, Sdcbp2, Sdcbp, Anxa2, Snap91, Plcd1, Sh3pxd2b, Alox15, Phlda3, Rph3a
121	GO:0005546	MF	phosphatidylinositol-4,5-bisphosphate binding	0.006260690222274711	12	Kcnq1, Sytl2, Hcn1, Anxa9, Sdcbp2, Sdcbp, Anxa2, Snap91, Plcd1, Alox15, Phlda3, Rph3a
122	GO:0016298	MF	lipase activity	0.026592748959936362	12	Gde1, Lipe, Pnlip, Smpd1, Mgll, Plb1, Plcd1, Proca1, Ddhd1, Pla1a, Lipg, Pla2g1b
123	GO:0072341	MF	modified amino acid binding	0.040039685136744226	11	Sytl2, Dhfr, Anxa9, Gss, Syt13, Anxa13, Anxa2, Plcd1, Ltc4s, Cbs, Scarb1
124	GO:0016229	MF	steroid dehydrogenase activity	4.392919894951589e-4	10	Hsd3b2, Hsd3b3, Hsd3b1, Dhrs9, Hsd11b1, Akr1c2, Akr1c12, Akr1c3, Akr1c1, Hsd17b2
125	GO:0043178	MF	alcohol binding	0.029465599861390013	10	Trpc4, Tspo, Soat2, Snap91, Rbp2, Plcd1, Cyp11a1, Nfe2l1, Star, Rph3a
126	GO:0033764	MF	steroid dehydrogenase activity, acting on the CH-OH group of donors, NAD or NADP as acceptor	4.392919894951589e-4	9	Hsd3b2, Hsd3b3, Hsd3b1, Dhrs9, Hsd11b1, Akr1c2, Akr1c3, Akr1c1, Hsd17b2
127	GO:0008028	MF	monocarboxylic acid transmembrane transporter activity	0.011275238102690856	9	Slc16a4, Slc16a6, Slc9a3r1, Slc16a5, Slc16a11, Mpc2, Abcc4, Slc51a, Slc10a2
128	GO:0050661	MF	NADP binding	0.012830809391623453	9	Dhcr7, Dhfr, H6pd, Decr1, G6pd, Idh1, Fdxr, Hsd11b1, Akr1c2
129	GO:0008106	MF	alcohol dehydrogenase (NADP+) activity	0.02528129431773925	6	Akr1b7, Aldh3a1, Akr1c2, Akr1c12, Akr1c3, Akr1c1
130	GO:0004033	MF	aldo-keto reductase (NADP) activity	0.041743143526744214	6	Akr1b7, Aldh3a1, Akr1c2, Akr1c12, Akr1c3, Akr1c1
131	GO:0032052	MF	bile acid binding	0.00548801171006982	5	Pygl, Akr1c2, Akr1c3, Akr1c1, Pla2g1b
132	GO:0004032	MF	alditol:NADP+ 1-oxidoreductase activity	0.02509860007682764	5	Akr1b7, Akr1c2, Akr1c12, Akr1c3, Akr1c1
133	GO:0004806	MF	triglyceride lipase activity	0.038097978243654934	5	Lipe, Pnlip, Plb1, Pla1a, Lipg
134	GO:0047834	MF	D-threo-aldose 1-dehydrogenase activity	0.041743143526744214	5	Akr1b7, Akr1c2, Akr1c12, Akr1c3, Akr1c1
135	GO:0047086	MF	ketosteroid monooxygenase activity	0.025223909432526417	4	Akr1c2, Akr1c12, Akr1c3, Akr1c1
