# Supplementary material for: Molecular Action of Tamoxifen in the Ovaries of Rats with Mammary Neoplasia
Source: Int J Mol Sci. 2023 Oct 30;24(21):15767. doi: 10.3390/ijms242115767 (PMC10649132; doi:10.3390/ijms242115767)
Supplement: Supplementary file 1 [file ijms-24-15767-s001.zip › supplementary/Table S13.xlsx]

## Sheet: Table. S13
Supplementary Table S13. Functional enrichment analysis (GO) of the positively correlated co-expressed trans-target genes predicted to be regulated by differentially expressed lncRNAs identified in the ovaries of tumor-bearing rats treated with tamoxifen
No.	GO term ID	Term category	Description	P-adjusted	Number of DEGs enriched to particular GO term	List of DEGs enriched to the particular GO term
1	GO:0007548	BP	sex differentiation	5.478945144386583e-4	37	Utf1, Gfra1, Sfrp2, Bmpr1b, Ptx3, Rad21l1, Dhcr24, Nr0b1, Bmp15, Msh2, Fshr, Esr2, Six4, Myh9, Hmga2, Amhr2, Dhh, Pgr, Acsbg1, Inha, Wnt9b, Cbx2, Sox8, Gdf9, Tex19.1, Inhbb, Lhx9, Tlr5, Kit, Fgf9, Inhba, Tp63, Insl3, Tex15, Fanca, Adgrg1, Brca2
2	GO:0050673	BP	epithelial cell proliferation	0.007359240677352883	37	Apoe, Sema5a, Sfrp2, Reg1a, Tacr1, Alox5, Fermt1, Bmp2, Gdf5, Aplnr, Runx3, Epha2, Plxnb3, Fshr, Esr2, Six4, Hmga2, Vdr, Ccn3, Apoa1, Pgr, Col4a3, Ihh, Igfbp5, Fgf18, Etv4, Ngfr, Vash2, Kit, Fgf9, Plau, Tp63, Fgf1, Cdh1, Lims1, Brca2, Flt1
3	GO:0042060	BP	wound healing	0.00815831433186977	36	Gpr4, Apoe, Smoc2, Syt7, Nlrp6, Anxa5, S100a8, S100a9, F2rl2, Reg1a, Alox5, Cd44, Fermt1, Duox1, Tnc, Epb41l4b, Ppara, Myh9, Ubash3b, Ccl20, Serpine2, Pecam1, Actg1, Serpinc1, Tec, Txk, Plau, Msx2, Insl3, Comp, Lox, Fgf1, Hbegf, Mpig6b, Cdkn1a, Tff3
4	GO:0060537	BP	muscle tissue development	0.01825030346356296	36	Arntl, H19, Alpk3, Nphs1, Sox6, Fgf3, Neurl1, S1pr1, Kcnab1, Pdlim5, Adamts9, Bmp2, Klhl41, Gata5, Agtr2, Six4, Ppara, Ihh, Igfbp5, Tcap, Sox8, Myocd, Ngfr, Sgcd, Kcnk2, Ppargc1a, Myh6, Myh7, Fgf9, Actn2, Pitx1, Ryr2, Myh15, Tp63, Lox, Mylk3
5	GO:0021700	BP	developmental maturation	5.831929751066679e-4	34	Rab38, Tdrd1, Neurl1, Dlg2, S1pr1, Cd44, Fermt1, Bmp2, Runx3, Npr2, Chrdl1, Esr2, Slc24a4, Sox10, Rnd1, Ntn4, Pgr, Farp2, Ihh, Trim58, Baiap3, Sez6, Sox8, Gdf9, Kif14, Bcl11a, Msx2, Mastl, Map3k13, App, Insl3, Cdkn1a, Brca2, Bhlha15
6	GO:0003012	BP	muscle system process	0.01825030346356296	34	Pde4d, Foxo1, Pdlim5, Trpc3, Tacr1, Sri, Klf15, Edn3, Gata5, Myom3, Agtr2, Chga, Ppara, Scn3b, Pgr, Chrnb4, Chrna3, Igfbp5, Tcap, Sgca, Myh1, Myocd, Chrnb1, Sgcd, Ptgs2, Ppargc1a, Kit, Myh6, Myh7, Actn2, Ryr2, Comp, Ctnna3, Flt1
7	GO:0030198	BP	extracellular matrix organization	2.8809916521762484e-4	33	Adamtsl3, Smoc2, Loxl4, Nphs1, Sfrp2, Ptx3, Adamts9, Fermt1, Bmp2, Ntng2, Creb3l1, Egfl6, Fshr, Chadl, Ntn4, Tnfrsf11b, Loxl1, Mpzl3, Col5a3, Mmp10, Kif9, Col4a3, Ihh, Noxo1, Adamts4, Adamts3, Mkx, App, Comp, Col4a2, Col4a1, Lox, Mmp11
8	GO:0043062	BP	extracellular structure organization	2.8809916521762484e-4	33	Adamtsl3, Smoc2, Loxl4, Nphs1, Sfrp2, Ptx3, Adamts9, Fermt1, Bmp2, Ntng2, Creb3l1, Egfl6, Fshr, Chadl, Ntn4, Tnfrsf11b, Loxl1, Mpzl3, Col5a3, Mmp10, Kif9, Col4a3, Ihh, Noxo1, Adamts4, Adamts3, Mkx, App, Comp, Col4a2, Col4a1, Lox, Mmp11
9	GO:0045229	BP	external encapsulating structure organization	2.8809916521762484e-4	33	Adamtsl3, Smoc2, Loxl4, Nphs1, Sfrp2, Ptx3, Adamts9, Fermt1, Bmp2, Ntng2, Creb3l1, Egfl6, Fshr, Chadl, Ntn4, Tnfrsf11b, Loxl1, Mpzl3, Col5a3, Mmp10, Kif9, Col4a3, Ihh, Noxo1, Adamts4, Adamts3, Mkx, App, Comp, Col4a2, Col4a1, Lox, Mmp11
10	GO:0045137	BP	development of primary sexual characteristics	5.831929751066679e-4	33	Utf1, Gfra1, Sfrp2, Bmpr1b, Ptx3, Rad21l1, Nr0b1, Bmp15, Msh2, Fshr, Esr2, Six4, Myh9, Hmga2, Amhr2, Dhh, Pgr, Acsbg1, Inha, Cbx2, Sox8, Gdf9, Tex19.1, Inhbb, Lhx9, Tlr5, Kit, Fgf9, Inhba, Insl3, Fanca, Adgrg1, Brca2
11	GO:0060562	BP	epithelial tube morphogenesis	0.0075130332369881744	33	Irx2, Folr1, Fgf3, Sema5a, Sfrp2, Cd44, Bmp2, Sall4, Aplnr, Clic4, Epha2, Tnc, Agtr2, Sostdc1, Mycn, Six4, Hmga2, Vdr, Pgr, Cxcr2, Ihh, Wnt6, Epha4, Tcap, Wnt9b, Ccdc40, Sox8, Etv4, Msx2, Ryr2, Col4a1, Fgf1, Flt1
12	GO:0001503	BP	ossification	0.020339423982167593	33	Scube2, S1pr1, Sfrp2, Bmpr1b, Tacr1, Alox5, Bmp2, Gdf5, Creb3l1, Runx3, Epha2, Npr2, Chrdl1, Crim1, Vdr, Dhh, Ihh, Igfbp5, Asgr2, Sox8, Fgf18, Notum, Ptgs2, Fgf9, Mkx, Msx2, Omd, Tp63, Gdf10, Comp, Lox, Tmem119, Kl
13	GO:0010876	BP	lipid localization	0.026852373128946165	33	Apoe, Syt7, Plppr4, Abca4, Fabp4, Lrat, Mest, Mfsd2a, Agtr2, Ppara, Apol2, Ano4, Sqle, Gpihbp1, Apoa1, Aqp9, Slco2a1, Abhd5, Erfe, Acsl3, Acsl6, Crhr1, Tex2, Gdf9, Fabp6, Ptgs2, Atp8a1, Cds1, Inhba, Acsl1, Lpl, Xkr5, Acacb
14	GO:0008406	BP	gonad development	9.054536378891586e-4	32	Utf1, Gfra1, Sfrp2, Bmpr1b, Ptx3, Rad21l1, Nr0b1, Bmp15, Msh2, Fshr, Esr2, Six4, Myh9, Hmga2, Amhr2, Dhh, Pgr, Acsbg1, Inha, Sox8, Gdf9, Tex19.1, Inhbb, Lhx9, Tlr5, Kit, Fgf9, Inhba, Insl3, Fanca, Adgrg1, Brca2
15	GO:0071900	BP	regulation of protein serine/threonine kinase activity	0.007242667541575736	32	Apoe, Psrc1, Ccno, Sfrp2, Bmpr1b, Rasgrp1, Trib3, Bmp2, Edn3, Prkar2b, Trib2, Tcl1a, Hmga2, Trib1, Epha4, Cd300a, Ccnf, Myocd, Fgf18, Cdc6, Gdf9, Gpr39, Kit, Mastl, Map3k13, App, Acsl1, Fgf1, Il34, Cdkn1a, Prkar1b, Flt1
16	GO:0009914	BP	hormone transport	0.013968554597603329	32	Arntl, Sct, Syt7, Crym, Glrx, Anxa5, Tacr1, Alox5, Sri, Pclo, Snap25, Edn3, C1qtnf12, Oprk1, Agtr2, Chga, Myh9, Hmga2, Vdr, Avpr1a, Ccn3, Ucn2, Inha, Crhr1, Baiap3, Gdf9, Gpr39, Inhbb, Ildr2, Epha5, Inhba, Rab11fip1
17	GO:0006631	BP	fatty acid metabolic process	0.02275610565398125	32	Aig1, LOC681458, Scd, Acsm5, Fads2, Gstm7, Fabp4, Pdk4, Alox5, Trib3, Ptgds, Gpat2, Mfsd2a, Mid1ip1, Prkar2b, Acot2, Acot1, Ppara, Avpr1a, Apoa1, Acsbg1, Abhd5, Erfe, Acsl3, Acsl6, Brca1, Ptgs2, Ppargc1a, Elovl2, Acsl1, Lpl, Acacb
18	GO:0046879	BP	hormone secretion	0.017321788770732725	31	Arntl, Sct, Syt7, Glrx, Anxa5, Tacr1, Alox5, Sri, Pclo, Snap25, Edn3, C1qtnf12, Oprk1, Agtr2, Chga, Myh9, Hmga2, Vdr, Avpr1a, Ccn3, Ucn2, Inha, Crhr1, Baiap3, Gdf9, Gpr39, Inhbb, Ildr2, Epha5, Inhba, Rab11fip1
19	GO:0001655	BP	urogenital system development	0.04060681931504006	31	Irx2, Gpr4, Dact2, Hells, Nphs1, Gfra1, Frem2, Vcan, Klf15, Cd44, Bmp2, Ass1, Tnc, Agtr2, Esr2, Six4, Cxcr2, Col4a3, Wnt6, Epha4, Pecam1, Wnt9b, Sox8, Myocd, Nphs2, Fras1, Tp63, Crlf1, Angpt2, Col4a1, Fgf1
20	GO:0042692	BP	muscle cell differentiation	0.042480512582364766	31	Alpk3, Actn4, Nphs1, Sox6, Pdlim5, Bmp2, Klhl41, Aplnr, Agtr2, Six4, Ppara, Myh9, Avpr1a, Ccn3, Adgrb1, Rora, Igfbp5, Tcap, Myocd, Chrnb1, Actg1, Sgcd, Kit, Myh6, Fgf9, Actn2, Comp, Lox, Mylk3, Tmem119, Bhlha15
21	GO:0019216	BP	regulation of lipid metabolic process	0.01814539350025734	30	Apoe, Sct, Rab38, Cd19, Hsd3b5, Pdk4, Trib3, Bmp2, Mfsd2a, Nr0b1, Mid1ip1, Ppara, Avpr1a, Dhh, Apoa1, Rora, Abhd5, Erfe, Acsl3, Brca1, Gpr39, Ptgs2, Ppargc1a, Kit, Pik3ip1, App, Tm6sf2, Fgf1, Flt1, Acacb
22	GO:0050890	BP	cognition	0.02090785237362244	30	Apoe, Sct, Epm2a, Kcnk4, Sorcs3, Pde4d, Plk2, Kcnab1, Tacr1, Grin2b, Snap25, Slc24a2, Mfsd2a, Oprk1, Shroom4, Ptchd1, Aff2, Prkar2b, Esr2, Pde1b, Chst10, Crhr1, Kcnk2, Ptgs2, Kit, Atp8a1, App, Neto1, Cux2, Prkar1b
23	GO:0007178	BP	transmembrane receptor protein serine/threonine kinase signaling pathway	0.021685317494320167	30	Dact2, Folr1, Sfrp2, Bmpr1b, Fermt1, Bmp2, Gdf5, Chrdl1, Bmp15, Crim1, Sostdc1, Ppara, Amhr2, Ccn3, Inha, Tmem100, Fam83g, Myocd, Gdf9, Inhbb, Grem2, Fgf9, Sfrp4, Msx2, Inhba, Gdf10, Comp, Lox, Ly6g6e, Hspa1a
24	GO:0050678	BP	regulation of epithelial cell proliferation	0.0228677761636152	30	Apoe, Sema5a, Sfrp2, Reg1a, Tacr1, Alox5, Bmp2, Gdf5, Aplnr, Runx3, Plxnb3, Esr2, Six4, Hmga2, Vdr, Pgr, Col4a3, Ihh, Fgf18, Etv4, Ngfr, Vash2, Fgf9, Plau, Tp63, Fgf1, Cdh1, Lims1, Brca2, Flt1
25	GO:0071695	BP	anatomical structure maturation	0.0016546155417043772	29	Tdrd1, Dlg2, S1pr1, Cd44, Fermt1, Bmp2, Runx3, Npr2, Esr2, Slc24a4, Sox10, Rnd1, Ntn4, Pgr, Farp2, Ihh, Trim58, Sox8, Gdf9, Kif14, Bcl11a, Msx2, Mastl, Map3k13, App, Insl3, Cdkn1a, Brca2, Bhlha15
26	GO:0060326	BP	cell chemotaxis	0.004663312843480246	29	Smoc2, Pde4d, S1pr1, Sema5a, S100a8, S100a9, Alox5, Klrk1, Edn3, Epha2, Csf3r, Plxnb3, Chga, Ccn3, Ccr9, Cxcr2, Ccl20, Hoxb9, Fgf18, Tmem102, Slamf1, Kit, Cxcl14, App, Lox, Fgf1, Hbegf, Il34, Flt1
27	GO:0046883	BP	regulation of hormone secretion	0.0072914871932468674	29	Arntl, Sct, Syt7, Glrx, Anxa5, Tacr1, Alox5, Sri, Snap25, Edn3, C1qtnf12, Oprk1, Agtr2, Chga, Myh9, Hmga2, Vdr, Avpr1a, Ccn3, Ucn2, Inha, Crhr1, Baiap3, Gdf9, Gpr39, Inhbb, Epha5, Inhba, Rab11fip1
28	GO:0072001	BP	renal system development	0.032169657687262265	29	Irx2, Gpr4, Dact2, Hells, Nphs1, Gfra1, Frem2, Vcan, Klf15, Cd44, Bmp2, Ass1, Agtr2, Six4, Cxcr2, Col4a3, Wnt6, Epha4, Pecam1, Wnt9b, Sox8, Myocd, Nphs2, Fras1, Tp63, Crlf1, Angpt2, Col4a1, Fgf1
29	GO:0001763	BP	morphogenesis of a branching structure	3.772974014033662e-4	28	Sema5a, Sfrp2, Cd44, Bmp2, Clic4, Epha2, Tnc, Agtr2, Mycn, Six4, Sox10, Hmga2, Vdr, Ntn4, Pgr, Ihh, Wnt6, Wnt9b, Sox8, Etv4, Bcl11a, Msx2, Map3k13, Tp63, Col4a1, Fgf1, Cdh1, Flt1
30	GO:0007162	BP	negative regulation of cell adhesion	0.007292500432454301	28	Dact2, Actn4, Scgb1a1, Sema5a, Plxna4, Cd44, Bmp2, Ass1, Runx3, Tnc, Plxnb3, Ppara, Rnd1, Plxnc1, Apoa1, Ubash3b, Ihh, Serpine2, Epha4, Cd300a, Ildr2, Epha5, Nf2, Bcl6, Sftpd, Angpt2, Cdh1, Clec4g
31	GO:0007584	BP	response to nutrient	0.008459321571294292	28	Folr1, Crym, Glrx, Sfrp2, Lrat, Alox5, Cd44, Ass1, Tnc, Orm1, Otc, Vdr, Tnfrsf11b, Cd3e, Apoa1, Acsl3, Acsl6, Havcr1, Stc2, Brca1, Lct, Ptgs2, Serpinc1, Ryr2, Acsl1, Lpl, Brca2, Kl
32	GO:0007611	BP	learning or memory	0.019176982917858545	28	Apoe, Sct, Epm2a, Kcnk4, Sorcs3, Pde4d, Plk2, Kcnab1, Tacr1, Grin2b, Snap25, Slc24a2, Oprk1, Ptchd1, Aff2, Prkar2b, Esr2, Pde1b, Chst10, Crhr1, Kcnk2, Ptgs2, Kit, Atp8a1, App, Neto1, Cux2, Prkar1b
33	GO:1904062	BP	regulation of cation transmembrane transport	0.0498549468819918	28	Cnih2, Fxyd7, Cd19, Pde4d, Glrx, Kcnab1, Gstm7, Alox5, Sri, Dpp6, Edn3, Aplnr, Oprk1, Wnk3, Ubash3b, Scn3b, Crhr1, Cacng4, Gpr39, Ppargc1a, Ramp3, Kcnrg, Actn2, Wnk2, Hecw1, Ryr2, App, Neto1
34	GO:0046661	BP	male sex differentiation	4.5012022475986e-4	27	Utf1, Gfra1, Sfrp2, Rad21l1, Dhcr24, Nr0b1, Msh2, Fshr, Esr2, Six4, Hmga2, Amhr2, Dhh, Inha, Wnt9b, Sox8, Tex19.1, Inhbb, Lhx9, Tlr5, Kit, Fgf9, Inhba, Insl3, Tex15, Fanca, Adgrg1
35	GO:0007517	BP	muscle organ development	0.03582511656844305	27	Arntl, H19, Nphs1, Fgf3, Neurl1, S1pr1, Kcnab1, Bmp2, Klhl41, Ass1, Jph1, Cavin4, Six4, Adgrb1, Ky, Tcap, Sox8, Myocd, Ngfr, Unc45b, Myh6, Myh7, Mkx, Pitx1, Ryr2, Myh15, Lox
36	GO:0061138	BP	morphogenesis of a branching epithelium	5.831929751066679e-4	26	Sema5a, Sfrp2, Cd44, Bmp2, Clic4, Epha2, Tnc, Agtr2, Mycn, Six4, Sox10, Hmga2, Vdr, Ntn4, Pgr, Ihh, Wnt6, Wnt9b, Sox8, Etv4, Msx2, Tp63, Col4a1, Fgf1, Cdh1, Flt1
37	GO:0061448	BP	connective tissue development	0.01814539350025734	26	Gpr4, Scube2, Sox6, Sfrp2, Bmpr1b, Sox5, Cd44, Slc25a25, Bmp2, Gdf5, Runx3, Mycn, Chadl, Hmga2, Ccn3, Ihh, Sox8, Fgf18, Ppargc1a, Fgf9, Slc39a14, Mkx, Pitx1, Msx2, Comp, Lox
38	GO:0019932	BP	second-messenger-mediated signaling	0.036558329514378804	26	Apoe, Sct, Pde4d, Grin2b, Edn3, Aplnr, Npr2, Gpr143, Slc24a4, Chga, Avpr1a, Cd3e, Gpr62, Ccr9, Cxcr2, Ccl20, Crhr1, Rasd1, Tmem100, Sgcd, Epha5, Ryr2, Trat1, App, Insl3, Bhlha15
39	GO:0046394	BP	carboxylic acid biosynthetic process	0.01814539350025734	25	Carns1, LOC681458, Psat1, Scd, Acsm5, Fads2, Bhmt, Gstm7, Pdk4, Alox5, Trib3, Ptgds, Ass1, Mid1ip1, Otc, Avpr1a, Apoa1, Acsbg1, Acsl3, Brca1, Nags, Ptgs2, Elovl2, Lpl, Acacb
40	GO:0016053	BP	organic acid biosynthetic process	0.01825030346356296	25	Carns1, LOC681458, Psat1, Scd, Acsm5, Fads2, Bhmt, Gstm7, Pdk4, Alox5, Trib3, Ptgds, Ass1, Mid1ip1, Otc, Avpr1a, Apoa1, Acsbg1, Acsl3, Brca1, Nags, Ptgs2, Elovl2, Lpl, Acacb
41	GO:0008584	BP	male gonad development	7.022129043528574e-4	24	Utf1, Gfra1, Sfrp2, Rad21l1, Nr0b1, Msh2, Fshr, Esr2, Six4, Hmga2, Amhr2, Dhh, Inha, Sox8, Tex19.1, Inhbb, Lhx9, Tlr5, Kit, Fgf9, Inhba, Insl3, Fanca, Adgrg1
42	GO:0046546	BP	development of primary male sexual characteristics	7.212344196631589e-4	24	Utf1, Gfra1, Sfrp2, Rad21l1, Nr0b1, Msh2, Fshr, Esr2, Six4, Hmga2, Amhr2, Dhh, Inha, Sox8, Tex19.1, Inhbb, Lhx9, Tlr5, Kit, Fgf9, Inhba, Insl3, Fanca, Adgrg1
43	GO:0007411	BP	axon guidance	0.00815831433186977	24	Sema5a, Bmpr1b, Lrtm2, Plxna4, Flrt3, Edn3, Runx3, Epha2, Tmeff1, Plxnb3, Plxnc1, Sema7a, Epha4, Efnb3, Etv4, Ngfr, Lhx9, Lamc2, Epha5, Tubb2b, Unc5a, Gap43, App, Unc5d
44	GO:0097485	BP	neuron projection guidance	0.008306498287732769	24	Sema5a, Bmpr1b, Lrtm2, Plxna4, Flrt3, Edn3, Runx3, Epha2, Tmeff1, Plxnb3, Plxnc1, Sema7a, Epha4, Efnb3, Etv4, Ngfr, Lhx9, Lamc2, Epha5, Tubb2b, Unc5a, Gap43, App, Unc5d
45	GO:0090092	BP	regulation of transmembrane receptor protein serine/threonine kinase signaling pathway	0.011080982500223574	24	Dact2, Folr1, Sfrp2, Fermt1, Bmp2, Gdf5, Chrdl1, Bmp15, Crim1, Sostdc1, Ppara, Ccn3, Inha, Myocd, Gdf9, Inhbb, Grem2, Fgf9, Sfrp4, Msx2, Inhba, Gdf10, Lox, Hspa1a
46	GO:0090287	BP	regulation of cellular response to growth factor stimulus	0.032014559147639884	24	Smoc2, Folr1, Sfrp2, Fermt1, Bmp2, Gdf5, Creb3l1, Chrdl1, Agtr2, Crim1, Sostdc1, Ppara, Myocd, Fgf18, Ngfr, Grem2, Adamts3, Fgf9, Sfrp4, Msx2, Lox, Fgf1, Hspa1a, Wasf1
47	GO:0045765	BP	regulation of angiogenesis	0.044050729187375244	24	Gpr4, Smoc2, Plk2, Sema5a, Sfrp2, Alox5, Hk2, Adamts9, Aplnr, Creb3l1, Epha2, Hmga2, Adgrb1, Minar1, Cxcr2, Col4a3, Fgf18, Brca1, Ngfr, Vash2, Angpt2, Col4a2, Fgf1, Flt1
48	GO:1901342	BP	regulation of vasculature development	0.04915166809708441	24	Gpr4, Smoc2, Plk2, Sema5a, Sfrp2, Alox5, Hk2, Adamts9, Aplnr, Creb3l1, Epha2, Hmga2, Adgrb1, Minar1, Cxcr2, Col4a3, Fgf18, Brca1, Ngfr, Vash2, Angpt2, Col4a2, Fgf1, Flt1
49	GO:0048469	BP	cell maturation	0.007242667541575736	23	Tdrd1, Dlg2, Runx3, Npr2, Esr2, Sox10, Rnd1, Ntn4, Pgr, Farp2, Ihh, Trim58, Sox8, Gdf9, Kif14, Bcl11a, Mastl, Map3k13, App, Insl3, Cdkn1a, Brca2, Bhlha15
50	GO:0048754	BP	branching morphogenesis of an epithelial tube	0.0016214018451896227	22	Sema5a, Sfrp2, Cd44, Bmp2, Clic4, Epha2, Tnc, Agtr2, Mycn, Six4, Hmga2, Vdr, Pgr, Ihh, Wnt6, Wnt9b, Sox8, Etv4, Msx2, Col4a1, Fgf1, Flt1
51	GO:0051216	BP	cartilage development	0.017511360423265006	21	Scube2, Sox6, Sfrp2, Bmpr1b, Sox5, Cd44, Bmp2, Gdf5, Runx3, Mycn, Chadl, Hmga2, Ccn3, Ihh, Fgf18, Fgf9, Slc39a14, Mkx, Pitx1, Msx2, Comp
52	GO:0098742	BP	cell-cell adhesion via plasma-membrane adhesion molecules	0.03298669158188783	21	Pvr, Celsr2, Pcdh10, Clstn3, Flrt3, Bmp2, Ntng2, Gata5, Plxnb3, Apoa1, Pecam1, Igsf9, Crb1, Nectin4, Pcdh20, Unc5d, Tenm3, Dsc1, Dsc3, Cbln1, Cdh1
53	GO:0002064	BP	epithelial cell development	0.035436672884430746	21	Gpr4, Dact2, Arntl, Nphs1, Pde4d, Tigar, Clic4, Epha2, Bmp15, Pof1b, Fshr, Esr2, Ccdc88c, Pgr, Ihh, Pecam1, Sox8, Nphs2, Tp63, Cdh1, Cdkn1a
54	GO:0006814	BP	sodium ion transport	0.03582511656844305	21	Nkain2, Fxyd7, Glrx, Slc6a6, Slc13a3, Slc23a2, Nkain1, Slc24a2, Wnk3, Slc24a4, Slc38a3, Scn3b, Asic4, Serpine2, Slc13a2, Slc13a5, Slc4a4, Slc28a3, Wnk2, Hecw1, Neto1
55	GO:0071902	BP	positive regulation of protein serine/threonine kinase activity	0.031104542519275778	20	Psrc1, Bmpr1b, Rasgrp1, Bmp2, Edn3, Tcl1a, Hmga2, Epha4, Fgf18, Cdc6, Gdf9, Gpr39, Kit, Mastl, Map3k13, App, Acsl1, Fgf1, Il34, Flt1
56	GO:0006633	BP	fatty acid biosynthetic process	0.002106684497966035	19	LOC681458, Scd, Acsm5, Fads2, Gstm7, Pdk4, Alox5, Trib3, Ptgds, Mid1ip1, Avpr1a, Apoa1, Acsbg1, Acsl3, Brca1, Ptgs2, Elovl2, Lpl, Acacb
57	GO:0072330	BP	monocarboxylic acid biosynthetic process	0.020339423982167593	19	LOC681458, Scd, Acsm5, Fads2, Gstm7, Pdk4, Alox5, Trib3, Ptgds, Mid1ip1, Avpr1a, Apoa1, Acsbg1, Acsl3, Brca1, Ptgs2, Elovl2, Lpl, Acacb
58	GO:0043405	BP	regulation of MAP kinase activity	0.02178735328439997	19	Apoe, Sfrp2, Rasgrp1, Trib3, Bmp2, Edn3, Trib2, Trib1, Epha4, Cd300a, Fgf18, Gdf9, Gpr39, Kit, Map3k13, App, Fgf1, Il34, Flt1
59	GO:0002062	BP	chondrocyte differentiation	5.831929751066679e-4	18	Scube2, Sox6, Sfrp2, Bmpr1b, Sox5, Bmp2, Gdf5, Runx3, Chadl, Hmga2, Ccn3, Ihh, Fgf18, Fgf9, Slc39a14, Mkx, Msx2, Comp
60	GO:0048565	BP	digestive tract development	0.010246987423884846	18	Sct, Sfrp2, Reg1a, Tigar, Ass1, Gata5, Otc, Sox10, Clmp, Ihh, Cps1, Ccdc40, Myocd, Kit, Fgf9, Tp63, Cdh1, Cdkn1a
61	GO:0022612	BP	gland morphogenesis	0.011664730102363786	18	Cd44, Epha2, Tnc, Sostdc1, Esr2, Vdr, Ntn4, Pgr, Igfbp5, Fgf18, Etv4, Plau, Sfrp4, Msx2, Tp63, Fgf1, Cdh1, Lims1
62	GO:0055123	BP	digestive system development	0.01825030346356296	18	Sct, Sfrp2, Reg1a, Tigar, Ass1, Gata5, Otc, Sox10, Clmp, Ihh, Cps1, Ccdc40, Myocd, Kit, Fgf9, Tp63, Cdh1, Cdkn1a
63	GO:0110148	BP	biomineralization	0.02090785237362244	18	Abcc6, S1pr1, Foxo1, Bmpr1b, Alox5, Bmp2, Ppara, Wnt6, Asgr2, Notum, Ptgs2, Msx2, Omd, Comp, Lox, Tspear, Tmem119, Kl
64	GO:0046660	BP	female sex differentiation	0.023105857248094303	18	Bmpr1b, Ptx3, Bmp15, Fshr, Esr2, Myh9, Amhr2, Pgr, Acsbg1, Inha, Gdf9, Inhbb, Lhx9, Kit, Inhba, Tp63, Fanca, Brca2
65	GO:0031644	BP	regulation of nervous system process	0.03441211743166061	18	Cnih2, Pclo, Grin2b, Oprk1, Sox10, Avpr1a, Ccn3, Chrnb4, Chrna5, Rims1, Cacng4, Tmem100, Ngfr, App, Neto1, Cbln1, Cux2, Prkar1b
66	GO:0046890	BP	regulation of lipid biosynthetic process	0.035436672884430746	18	Apoe, Rab38, Hsd3b5, Pdk4, Trib3, Bmp2, Mfsd2a, Nr0b1, Mid1ip1, Ppara, Avpr1a, Dhh, Apoa1, Acsl3, Brca1, Ptgs2, Ppargc1a, Fgf1
67	GO:0048659	BP	smooth muscle cell proliferation	0.036558329514378804	18	Apoe, Ptgir, Pde4d, S1pr1, Tacr1, Bmp2, Esr2, Ccn3, Trib1, Igfbp5, Myocd, Ptgs2, Rgs5, Ppargc1a, Fgf9, Hbegf, Cdkn1a, Flt1
68	GO:0042476	BP	odontogenesis	0.017321788770732725	17	Foxo1, Bmp2, Tnc, Csf3r, Sostdc1, Slc24a4, Ppara, Tnfrsf11b, Wnt10a, Wnt6, Ngfr, Adamts4, Nf2, Msx2, Inhba, Tp63, Tspear
69	GO:0008585	BP	female gonad development	0.017511360423265006	17	Bmpr1b, Ptx3, Bmp15, Fshr, Esr2, Myh9, Amhr2, Pgr, Acsbg1, Inha, Gdf9, Inhbb, Lhx9, Kit, Inhba, Fanca, Brca2
70	GO:0072073	BP	kidney epithelium development	0.01814539350025734	17	Irx2, Nphs1, Vcan, Klf15, Cd44, Bmp2, Agtr2, Six4, Cxcr2, Wnt6, Epha4, Pecam1, Wnt9b, Sox8, Nphs2, Crlf1, Fgf1
71	GO:0046545	BP	development of primary female sexual characteristics	0.019967472436981205	17	Bmpr1b, Ptx3, Bmp15, Fshr, Esr2, Myh9, Amhr2, Pgr, Acsbg1, Inha, Gdf9, Inhbb, Lhx9, Kit, Inhba, Fanca, Brca2
72	GO:0007613	BP	memory	0.026555406123012597	17	Apoe, Kcnk4, Sorcs3, Pde4d, Plk2, Tacr1, Grin2b, Snap25, Slc24a2, Ptchd1, Chst10, Crhr1, Kcnk2, Ptgs2, App, Neto1, Cux2
73	GO:0031214	BP	biomineral tissue development	0.03015309095720929	17	S1pr1, Foxo1, Bmpr1b, Alox5, Bmp2, Ppara, Wnt6, Asgr2, Notum, Ptgs2, Msx2, Omd, Comp, Lox, Tspear, Tmem119, Kl
74	GO:0007292	BP	female gamete generation	0.03582511656844305	17	Tdrd1, Bmpr1b, Ptx3, Npr2, Ezhip, Pgr, Ihh, Top2a, Gdf9, Inhbb, Ptgs2, Plau, Inhba, Mastl, Insl3, Nanos3, Brca2
75	GO:0048660	BP	regulation of smooth muscle cell proliferation	0.04497230066603257	17	Apoe, Ptgir, Pde4d, S1pr1, Tacr1, Bmp2, Esr2, Trib1, Igfbp5, Myocd, Ptgs2, Rgs5, Ppargc1a, Fgf9, Hbegf, Cdkn1a, Flt1
76	GO:0042303	BP	molting cycle	0.007595744277933455	16	Arntl, Lrig1, Fermt1, Runx3, Sostdc1, Mpzl3, Wnt10a, Farp2, Igfbp5, Ngfr, Ptgs2, Tnfrsf19, Msx2, Inhba, Tp63, Tspear
77	GO:0042633	BP	hair cycle	0.007595744277933455	16	Arntl, Lrig1, Fermt1, Runx3, Sostdc1, Mpzl3, Wnt10a, Farp2, Igfbp5, Ngfr, Ptgs2, Tnfrsf19, Msx2, Inhba, Tp63, Tspear
78	GO:0006694	BP	steroid biosynthetic process	0.035436672884430746	16	Apoe, Cyb5r2, Hsd3b5, Bmp2, Dhcr24, Nr0b1, Dhh, Sqle, Apoa1, Hsd17b1, Hsd17b7, Ppargc1a, Idi1, Msmo1, Fgf1, Mvd
79	GO:0072006	BP	nephron development	0.035436672884430746	16	Irx2, Gpr4, Nphs1, Klf15, Cd44, Bmp2, Agtr2, Six4, Col4a3, Wnt6, Pecam1, Wnt9b, Sox8, Nphs2, Angpt2, Fgf1
80	GO:0045834	BP	positive regulation of lipid metabolic process	0.044279621332255485	16	Apoe, Sct, Rab38, Cd19, Mfsd2a, Mid1ip1, Ppara, Avpr1a, Apoa1, Abhd5, Acsl3, Ptgs2, Ppargc1a, App, Fgf1, Flt1
81	GO:0030278	BP	regulation of ossification	0.020987133802388848	15	Scube2, S1pr1, Bmpr1b, Tacr1, Alox5, Bmp2, Creb3l1, Vdr, Notum, Mkx, Omd, Gdf10, Comp, Tmem119, Kl
82	GO:0006639	BP	acylglycerol metabolic process	0.025103096870133686	15	Apoe, Pnliprp2, Scd, Gpat2, Mfsd2a, Dgkk, Gpihbp1, Apoa1, Abhd5, Cps1, Acsl6, Gpat3, Acsl1, Lpl, Pnpla1
83	GO:0006638	BP	neutral lipid metabolic process	0.026852373128946165	15	Apoe, Pnliprp2, Scd, Gpat2, Mfsd2a, Dgkk, Gpihbp1, Apoa1, Abhd5, Cps1, Acsl6, Gpat3, Acsl1, Lpl, Pnpla1
84	GO:0042475	BP	odontogenesis of dentin-containing tooth	0.009489388822238614	14	Foxo1, Bmp2, Tnc, Csf3r, Sostdc1, Slc24a4, Ppara, Tnfrsf11b, Wnt10a, Wnt6, Ngfr, Nf2, Msx2, Tp63
85	GO:0006641	BP	triglyceride metabolic process	0.014062307130691466	14	Apoe, Pnliprp2, Scd, Gpat2, Mfsd2a, Gpihbp1, Apoa1, Abhd5, Cps1, Acsl6, Gpat3, Acsl1, Lpl, Pnpla1
86	GO:0060079	BP	excitatory postsynaptic potential	0.01814539350025734	14	Pclo, Grin2b, Chrnb4, Chrna3, Chrna5, Rims1, Sez6, Chrnb1, Ngfr, App, Neto1, Cbln1, Cux2, Prkar1b
87	GO:0099565	BP	chemical synaptic transmission, postsynaptic	0.026129822104765457	14	Pclo, Grin2b, Chrnb4, Chrna3, Chrna5, Rims1, Sez6, Chrnb1, Ngfr, App, Neto1, Cbln1, Cux2, Prkar1b
88	GO:2000027	BP	regulation of animal organ morphogenesis	0.032014559147639884	14	Fgf3, Sfrp2, Bmp2, Gata5, Agtr2, Six4, Ntn4, Tnfrsf11b, Wnt10a, Wnt9b, Sox8, Ngfr, Fgf1, Cdh1
89	GO:0061041	BP	regulation of wound healing	0.035436672884430746	14	Apoe, Smoc2, Anxa5, S100a9, Alox5, Fermt1, Duox1, Ubash3b, Serpine2, Actg1, Serpinc1, Plau, Insl3, Hbegf
90	GO:0022404	BP	molting cycle process	0.021779910150164245	13	Lrig1, Fermt1, Runx3, Sostdc1, Wnt10a, Farp2, Igfbp5, Ngfr, Tnfrsf19, Msx2, Inhba, Tp63, Tspear
91	GO:0022405	BP	hair cycle process	0.021779910150164245	13	Lrig1, Fermt1, Runx3, Sostdc1, Wnt10a, Farp2, Igfbp5, Ngfr, Tnfrsf19, Msx2, Inhba, Tp63, Tspear
92	GO:0016525	BP	negative regulation of angiogenesis	0.025228663694840867	13	Gpr4, Plk2, Alox5, Adamts9, Creb3l1, Epha2, Adgrb1, Minar1, Col4a3, Ngfr, Angpt2, Col4a2, Flt1
93	GO:0050886	BP	endocrine process	0.025228663694840867	13	Tacr1, Edn3, Oprk1, Agtr2, Vdr, Avpr1a, Ucn2, Inha, Crhr1, Gdf9, Inhbb, Inhba, Rab11fip1
94	GO:0014897	BP	striated muscle hypertrophy	0.027352904905877502	13	Foxo1, Pdlim5, Trpc3, Klf15, Gata5, Agtr2, Ppara, Igfbp5, Tcap, Myocd, Myh6, Myh7, Ryr2
95	GO:2000181	BP	negative regulation of blood vessel morphogenesis	0.027352904905877502	13	Gpr4, Plk2, Alox5, Adamts9, Creb3l1, Epha2, Adgrb1, Minar1, Col4a3, Ngfr, Angpt2, Col4a2, Flt1
96	GO:1901343	BP	negative regulation of vasculature development	0.0292643062256216	13	Gpr4, Plk2, Alox5, Adamts9, Creb3l1, Epha2, Adgrb1, Minar1, Col4a3, Ngfr, Angpt2, Col4a2, Flt1
97	GO:0014896	BP	muscle hypertrophy	0.03015309095720929	13	Foxo1, Pdlim5, Trpc3, Klf15, Gata5, Agtr2, Ppara, Igfbp5, Tcap, Myocd, Myh6, Myh7, Ryr2
98	GO:0042698	BP	ovulation cycle	0.03841661583228223	13	Glrx, Bmpr1b, Ptx3, Bmp2, Oprk1, Fshr, Esr2, Chga, Myh9, Pgr, Gdf9, Inhba, Gdf10
99	GO:0072009	BP	nephron epithelium development	0.04453671535816032	13	Irx2, Nphs1, Klf15, Cd44, Bmp2, Agtr2, Six4, Wnt6, Pecam1, Wnt9b, Sox8, Nphs2, Fgf1
100	GO:0070542	BP	response to fatty acid	0.027615200648434694	12	Kcnk4, LOC681458, Scd, Pcsk1, Foxo1, Pdk4, Ass1, Cps1, Ptgs2, Ppargc1a, Acsl1, Lpl
101	GO:0098869	BP	cellular oxidant detoxification	0.03067144030048004	12	Apoe, Gsto2, Glrx, S100a8, S100a9, Gstm7, Duox1, Tp53inp1, Gpx2, Txndc2, Hba-a3, Ptgs2
102	GO:0019217	BP	regulation of fatty acid metabolic process	0.032014559147639884	12	Pdk4, Trib3, Mfsd2a, Mid1ip1, Ppara, Avpr1a, Apoa1, Erfe, Brca1, Ptgs2, Ppargc1a, Acacb
103	GO:0003300	BP	cardiac muscle hypertrophy	0.04453671535816032	12	Foxo1, Pdlim5, Trpc3, Klf15, Gata5, Agtr2, Ppara, Tcap, Myocd, Myh6, Myh7, Ryr2
104	GO:0060986	BP	endocrine hormone secretion	0.011604056664479324	11	Oprk1, Agtr2, Vdr, Avpr1a, Ucn2, Inha, Crhr1, Gdf9, Inhbb, Inhba, Rab11fip1
105	GO:0043954	BP	cellular component maintenance	0.0292643062256216	11	Apoe, Plekha7, Dlg2, Pclo, Grin2b, Bsn, Rims1, Myocd, App, Erc2, Cbln1
106	GO:0006637	BP	acyl-CoA metabolic process	0.032014559147639884	11	Acsm5, Pdk4, Acot2, Acot1, Acsl3, Acsl6, Pipox, Acsl1, Aadat, Mvd, Acacb
107	GO:0035383	BP	thioester metabolic process	0.032014559147639884	11	Acsm5, Pdk4, Acot2, Acot1, Acsl3, Acsl6, Pipox, Acsl1, Aadat, Mvd, Acacb
108	GO:0048708	BP	astrocyte differentiation	0.035436672884430746	11	Sox6, S100a8, S100a9, Bmp2, Mycn, Hmga2, Serpine2, Epha4, Sox8, Gpr37l1, App
109	GO:0044060	BP	regulation of endocrine process	0.010246987423884846	10	Oprk1, Agtr2, Vdr, Avpr1a, Ucn2, Inha, Crhr1, Gdf9, Inhbb, Inhba
110	GO:0016126	BP	sterol biosynthetic process	0.012287206061587012	10	Apoe, Cyb5r2, Dhcr24, Sqle, Apoa1, Hsd17b7, Idi1, Msmo1, Fgf1, Mvd
111	GO:0048662	BP	negative regulation of smooth muscle cell proliferation	0.019940335038659402	10	Apoe, Ptgir, Bmp2, Esr2, Trib1, Igfbp5, Myocd, Rgs5, Ppargc1a, Cdkn1a
112	GO:0098815	BP	modulation of excitatory postsynaptic potential	0.026852373128946165	9	Pclo, Grin2b, Rims1, Ngfr, App, Neto1, Cbln1, Cux2, Prkar1b
113	GO:0060389	BP	pathway-restricted SMAD protein phosphorylation	0.04497230066603257	9	Bmp2, Gdf5, Bmp15, Amhr2, Inha, Gdf9, Inhbb, Inhba, Gdf10
114	GO:0010862	BP	positive regulation of pathway-restricted SMAD protein phosphorylation	0.0337380431593957	8	Bmp2, Gdf5, Bmp15, Inha, Gdf9, Inhbb, Inhba, Gdf10
115	GO:0007588	BP	excretion	0.04109254803981182	8	Nphs1, Slc22a6, Tacr1, Agtr2, Avpr1a, Pgr, Chrnb4, Chrna3
116	GO:0006695	BP	cholesterol biosynthetic process	0.048815564001863224	8	Apoe, Dhcr24, Apoa1, Hsd17b7, Idi1, Msmo1, Fgf1, Mvd
117	GO:1902653	BP	secondary alcohol biosynthetic process	0.048815564001863224	8	Apoe, Dhcr24, Apoa1, Hsd17b7, Idi1, Msmo1, Fgf1, Mvd
118	GO:0007271	BP	synaptic transmission, cholinergic	0.01814539350025734	7	Ric3, Tacr1, Chrnb4, Chrna3, Chrna5, Chrnb1, Ngfr
119	GO:0019433	BP	triglyceride catabolic process	0.020339423982167593	7	Pnliprp2, Gpihbp1, Apoa1, Abhd5, Cps1, Lpl, Pnpla1
120	GO:0000038	BP	very long-chain fatty acid metabolic process	0.02178735328439997	7	Fads2, Acot2, Acot1, Acsbg1, Acsl6, Elovl2, Acsl1
121	GO:0051154	BP	negative regulation of striated muscle cell differentiation	0.036786791289239444	7	Sox6, Bmp2, Ppara, Ccn3, Myocd, Tmem119, Bhlha15
122	GO:2000463	BP	positive regulation of excitatory postsynaptic potential	0.036786791289239444	7	Grin2b, Rims1, Ngfr, App, Neto1, Cux2, Prkar1b
123	GO:0110110	BP	positive regulation of animal organ morphogenesis	0.04101838846431631	7	Fgf3, Bmp2, Gata5, Six4, Sox8, Ngfr, Fgf1
124	GO:0003299	BP	muscle hypertrophy in response to stress	0.026852373128946165	6	Foxo1, Trpc3, Klf15, Tcap, Myh6, Myh7
125	GO:0014898	BP	cardiac muscle hypertrophy in response to stress	0.026852373128946165	6	Foxo1, Trpc3, Klf15, Tcap, Myh6, Myh7
126	GO:0014887	BP	cardiac muscle adaptation	0.03015309095720929	6	Foxo1, Trpc3, Klf15, Tcap, Myh6, Myh7
127	GO:0071711	BP	basement membrane organization	0.04101838846431631	6	Fermt1, Ntng2, Fshr, Ntn4, Col4a1, Mmp11
128	GO:0035095	BP	behavioral response to nicotine	0.004496345366404031	5	Ppara, Chrnb4, Chrna3, Chrna5, Chrnb1
129	GO:0032276	BP	regulation of gonadotropin secretion	0.019967472436981205	5	Oprk1, Ucn2, Inha, Inhbb, Inhba
130	GO:0090136	BP	epithelial cell-cell adhesion	0.019967472436981205	5	Plekha7, Ccn3, Ihh, Kit, Ctnna3
131	GO:0016322	BP	neuron remodeling	0.02275610565398125	5	Rnd1, Ntn4, Farp2, Bcl11a, App
132	GO:0072079	BP	nephron tubule formation	0.035436672884430746	5	Irx2, Six4, Wnt6, Wnt9b, Sox8
133	GO:0032274	BP	gonadotropin secretion	0.04047572589619671	5	Oprk1, Ucn2, Inha, Inhbb, Inhba
134	GO:0032277	BP	negative regulation of gonadotropin secretion	0.023105857248094303	4	Oprk1, Ucn2, Inha, Inhbb
135	GO:0046880	BP	regulation of follicle-stimulating hormone secretion	0.023105857248094303	4	Ucn2, Inha, Inhbb, Inhba
136	GO:1990709	BP	presynaptic active zone organization	0.03015309095720929	4	Pclo, Bsn, Rims1, Erc2
137	GO:0046884	BP	follicle-stimulating hormone secretion	0.035436672884430746	4	Ucn2, Inha, Inhbb, Inhba
138	GO:0038063	BP	collagen-activated tyrosine kinase receptor signaling pathway	0.04417771066556476	4	Ubash3b, Col4a3, Col4a2, Col4a1
139	GO:0031012	CC	extracellular matrix	1.409356467124819e-8	49	Adamtsl3, Fcgbp, Apoe, Smoc2, Pcsk6, Hapln3, Loxl4, Nphs1, Zp1, Vwa2, Mamdc2, Frem2, Vcan, Sfrp2, Ptx3, Lrig1, Adamts9, Ntng2, Tnc, Tmeff1, Egfl6, Chadl, Lingo3, Ntn4, Ccn3, Tnfrsf11b, Loxl1, Col5a3, Mmp10, Col4a3, Ihh, Serpine2, Wnt6, Igfals, Lrrn2, Lamc2, Adamts4, Fras1, Adamts3, Fgf9, Omd, Comp, Angpt2, Col4a2, Col4a1, Lox, Fgf1, Mmp11, Elfn1
140	GO:0030312	CC	external encapsulating structure	1.409356467124819e-8	49	Adamtsl3, Fcgbp, Apoe, Smoc2, Pcsk6, Hapln3, Loxl4, Nphs1, Zp1, Vwa2, Mamdc2, Frem2, Vcan, Sfrp2, Ptx3, Lrig1, Adamts9, Ntng2, Tnc, Tmeff1, Egfl6, Chadl, Lingo3, Ntn4, Ccn3, Tnfrsf11b, Loxl1, Col5a3, Mmp10, Col4a3, Ihh, Serpine2, Wnt6, Igfals, Lrrn2, Lamc2, Adamts4, Fras1, Adamts3, Fgf9, Omd, Comp, Angpt2, Col4a2, Col4a1, Lox, Fgf1, Mmp11, Elfn1
141	GO:0043235	CC	receptor complex	1.4391632740392042e-5	43	Arntl, Loxl4, Cnih2, Ahrr, Gfra1, Itga10, Osmr, Bmpr1b, Grm8, Plxna4, Grin2b, Cd44, Bmp2, Lrp1b, Gabrr2, Epha2, Csf3r, Plxnb3, Fshr, Vdr, Amhr2, Plxnc1, Tnfrsf11b, Cd3e, Gpr62, Cd3g, Chrnb4, Chrna3, Chrna5, Epha4, Cacng4, Skap1, Chrnb1, Gpr37l1, Epha5, Kit, Ramp3, Trat1, Gpr156, App, Crlf1, Kctd16, Flt1
142	GO:0009897	CC	external side of plasma membrane	0.017321788770732725	35	Apoe, Mfge8, Folr1, Gfra1, Cd19, Plppr4, Itga10, S1pr1, Anxa5, Osmr, Clec2d2, Klrk1, Cd44, Csf3r, Serpina5, Gpihbp1, Cd3e, Cd3g, Ccr9, Sema7a, Cxcr2, Serpine2, Pecam1, Dnai2, Asgr2, Asgr1, Ngfr, Btnl9, Ly9, Slamf1, Epha5, Kit, Crlf1, Cd226, Fcer2
143	GO:0097060	CC	synaptic membrane	0.01814539350025734	35	Kcnc3, Syt7, Sorcs3, Cnih2, Dlg2, Plppr4, Grm8, Iqsec3, Clstn3, Grin2b, Slc6a6, Kcna4, Rims4, Flrt3, Snap25, Ntng2, Gabrr2, Oprk1, Atp2b3, Cnksr2, Adgrb1, Bsn, Chrnb4, Chrna3, Chrna5, Rims1, Epha4, Efnb3, Cacng4, Chrnb1, Actn2, Erc2, Kctd16, Neto1, Cbln1
144	GO:0062023	CC	collagen-containing extracellular matrix	9.482220821630724e-5	30	Smoc2, Pcsk6, Loxl4, Nphs1, Zp1, Vwa2, Mamdc2, Frem2, Vcan, Sfrp2, Ntng2, Tnc, Tmeff1, Egfl6, Chadl, Ntn4, Ccn3, Loxl1, Col5a3, Col4a3, Serpine2, Lamc2, Fras1, Fgf9, Omd, Comp, Angpt2, Col4a2, Col4a1, Lox
145	GO:0045211	CC	postsynaptic membrane	0.01814539350025734	27	Kcnc3, Sorcs3, Cnih2, Dlg2, Plppr4, Grm8, Iqsec3, Clstn3, Grin2b, Slc6a6, Kcna4, Flrt3, Gabrr2, Oprk1, Cnksr2, Adgrb1, Chrnb4, Chrna3, Chrna5, Epha4, Efnb3, Cacng4, Chrnb1, Actn2, Kctd16, Neto1, Cbln1
146	GO:0034702	CC	ion channel complex	0.010359812099331657	26	Ttyh1, Kcnc3, Kcnk4, Cnih2, Pde4d, Kcnab1, Trpc3, Dpp6, Grin2b, Kcna4, Snap25, Gabrr2, Clic4, Kcnq4, Scn3b, Chrnb4, Chrna3, Chrna5, Cacng4, Chrnb1, Kcnk2, Cnga1, Ryr2, Clic6, Cacna2d3, Kcng4
147	GO:0043292	CC	contractile fiber	0.007292500432454301	24	Actn4, Rtn2, Pde4d, Pdlim5, Anxa5, Sri, Grin2b, Klhl41, Jph1, Myom3, Cavin4, Scn3b, Ky, Sphkap, Pecam1, Tcap, Myh13, Myh1, Actg1, Ablim2, Myh6, Myh7, Actn2, Ryr2
148	GO:0030016	CC	myofibril	0.008306498287732769	23	Actn4, Rtn2, Pde4d, Pdlim5, Anxa5, Sri, Grin2b, Klhl41, Jph1, Myom3, Cavin4, Scn3b, Ky, Sphkap, Tcap, Myh13, Myh1, Actg1, Ablim2, Myh6, Myh7, Actn2, Ryr2
149	GO:0099240	CC	intrinsic component of synaptic membrane	0.017511360423265006	23	Kcnc3, Syt7, Sorcs3, Cnih2, Dlg2, Plppr4, Grm8, Clstn3, Grin2b, Slc6a6, Kcna4, Flrt3, Snap25, Ntng2, Oprk1, Atp2b3, Adgrb1, Chrna3, Epha4, Efnb3, Cacng4, Chrnb1, Neto1
150	GO:0044306	CC	neuron projection terminus	0.042480512582364766	21	Kcnc3, Syt7, Pcsk1, Anxa5, Syn2, Sri, Pclo, Grin2b, Flrt3, Snap25, Ncs1, Oprk1, Bsn, Pgr, Epha4, Actg1, Kcnk2, Cnga1, App, Erc2, Cdh1
151	GO:0043679	CC	axon terminus	0.03537882119974788	20	Kcnc3, Syt7, Pcsk1, Anxa5, Syn2, Sri, Pclo, Grin2b, Flrt3, Snap25, Ncs1, Oprk1, Pgr, Epha4, Actg1, Kcnk2, Cnga1, App, Erc2, Cdh1
152	GO:0099699	CC	integral component of synaptic membrane	0.03582511656844305	20	Kcnc3, Syt7, Sorcs3, Cnih2, Plppr4, Grm8, Clstn3, Grin2b, Slc6a6, Kcna4, Flrt3, Oprk1, Atp2b3, Adgrb1, Chrna3, Epha4, Efnb3, Cacng4, Chrnb1, Neto1
153	GO:0030017	CC	sarcomere	0.03015309095720929	19	Actn4, Rtn2, Pdlim5, Anxa5, Sri, Grin2b, Klhl41, Jph1, Myom3, Cavin4, Scn3b, Ky, Sphkap, Tcap, Myh1, Myh6, Myh7, Actn2, Ryr2
154	GO:0098936	CC	intrinsic component of postsynaptic membrane	0.02178735328439997	18	Kcnc3, Sorcs3, Cnih2, Dlg2, Plppr4, Clstn3, Grin2b, Slc6a6, Kcna4, Flrt3, Oprk1, Adgrb1, Chrna3, Epha4, Efnb3, Cacng4, Chrnb1, Neto1
155	GO:0099055	CC	integral component of postsynaptic membrane	0.026852373128946165	17	Kcnc3, Sorcs3, Cnih2, Plppr4, Clstn3, Grin2b, Slc6a6, Kcna4, Flrt3, Oprk1, Adgrb1, Chrna3, Epha4, Efnb3, Cacng4, Chrnb1, Neto1
156	GO:0098802	CC	plasma membrane signaling receptor complex	0.03470710551066997	17	Cnih2, Itga10, Osmr, Grin2b, Bmp2, Amhr2, Cd3e, Cd3g, Chrnb4, Chrna3, Chrna5, Cacng4, Skap1, Chrnb1, Ramp3, Trat1, Gpr156
157	GO:0005604	CC	basement membrane	0.00263925713825552	16	Smoc2, Nphs1, Vwa2, Frem2, Ntng2, Tnc, Tmeff1, Egfl6, Ntn4, Loxl1, Col4a3, Lamc2, Fras1, Fgf9, Col4a2, Col4a1
158	GO:0030018	CC	Z disc	0.010359812099331657	16	Actn4, Rtn2, Pdlim5, Anxa5, Sri, Grin2b, Jph1, Cavin4, Scn3b, Ky, Sphkap, Tcap, Myh6, Myh7, Actn2, Ryr2
159	GO:0031674	CC	I band	0.01814539350025734	16	Actn4, Rtn2, Pdlim5, Anxa5, Sri, Grin2b, Jph1, Cavin4, Scn3b, Ky, Sphkap, Tcap, Myh6, Myh7, Actn2, Ryr2
160	GO:0005912	CC	adherens junction	0.019967472436981205	16	Pvr, Plekha7, Pdlim5, Frmd5, Shroom4, Pof1b, Wnk3, Myh9, Rnd1, Pkp1, Crb1, Nectin4, Epha5, Nf2, Cdh1, Ctnna3
161	GO:0098982	CC	GABA-ergic synapse	0.020970649000458204	13	Syt7, Grm8, Iqsec3, Pclo, Clstn3, Slc6a6, Gabrr2, Atp2b3, Bsn, Rims1, Baiap3, Gap43, Erc2
162	GO:0099569	CC	presynaptic cytoskeleton	9.151733481589183e-4	6	Pclo, LOC100361457, Bsn, Rims1, Actg1, Erc2
163	GO:0032982	CC	myosin filament	0.026852373128946165	5	Myh9, Myh1, Myh6, Myh7, Myh15
164	GO:0042101	CC	T cell receptor complex	0.035436672884430746	4	Cd3e, Cd3g, Skap1, Trat1
165	GO:0030546	MF	signaling receptor activator activity	0.0011864073070018792	40	Sct, Gpha2, Fgf3, Sema5a, Sfrp2, Reg1a, Flrt3, Bmp2, Edn3, Gdf5, C1qtnf12, Bmp15, Ccn3, Tnfrsf11b, Tg, Apoa1, Ucn2, Sema7a, Erfe, Wnt10a, Ccl20, Wnt6, Inha, Wnt9b, Fgf18, Stc2, Gdf9, Inhbb, Grem2, Fgf9, Cxcl14, Inhba, App, Insl3, Gdf10, Crlf1, Fgf1, Hbegf, Il34, Ly6g6e
166	GO:0048018	MF	receptor ligand activity	0.0015642695754174414	39	Sct, Gpha2, Fgf3, Sema5a, Sfrp2, Reg1a, Flrt3, Bmp2, Edn3, Gdf5, C1qtnf12, Bmp15, Ccn3, Tnfrsf11b, Tg, Apoa1, Ucn2, Sema7a, Erfe, Wnt10a, Ccl20, Wnt6, Inha, Wnt9b, Fgf18, Stc2, Gdf9, Inhbb, Grem2, Fgf9, Cxcl14, Inhba, App, Insl3, Gdf10, Crlf1, Fgf1, Hbegf, Il34
167	GO:0015267	MF	channel activity	0.020970649000458204	35	Ttyh1, Kcnc3, Ano5, Trpm1, Kcnk4, Kcnab1, Trpc3, Grin2b, Kcna4, Snap25, Ncs1, Gabrr2, Clic4, Slc24a2, Kcnq4, Slc26a7, Slc24a4, Panx2, Gsdmd, Ano4, Scn3b, Aqp9, Chrnb4, Chrna3, Chrna5, Asic4, Cacng4, Chrnb1, Kcnk2, Cnga1, Ryr2, Clic6, Cacna2d3, Kcng4, Calhm5
168	GO:0022803	MF	passive transmembrane transporter activity	0.020970649000458204	35	Ttyh1, Kcnc3, Ano5, Trpm1, Kcnk4, Kcnab1, Trpc3, Grin2b, Kcna4, Snap25, Ncs1, Gabrr2, Clic4, Slc24a2, Kcnq4, Slc26a7, Slc24a4, Panx2, Gsdmd, Ano4, Scn3b, Aqp9, Chrnb4, Chrna3, Chrna5, Asic4, Cacng4, Chrnb1, Kcnk2, Cnga1, Ryr2, Clic6, Cacna2d3, Kcng4, Calhm5
169	GO:0005216	MF	ion channel activity	0.023105857248094303	32	Ttyh1, Kcnc3, Ano5, Trpm1, Kcnk4, Kcnab1, Trpc3, Grin2b, Kcna4, Snap25, Ncs1, Gabrr2, Clic4, Slc24a2, Kcnq4, Slc26a7, Slc24a4, Ano4, Scn3b, Chrnb4, Chrna3, Chrna5, Asic4, Cacng4, Chrnb1, Kcnk2, Cnga1, Ryr2, Clic6, Cacna2d3, Kcng4, Calhm5
170	GO:0046873	MF	metal ion transmembrane transporter activity	0.03942975702948501	30	Kcnc3, Trpm1, Kcnk4, Kcnab1, Anxa5, Trpc3, Grin2b, Slc6a6, Kcna4, Slc13a3, Slc23a2, Snap25, Ncs1, Slc24a2, Mfsd2a, Kcnq4, Atp2b3, Slc24a4, Myh9, Scn3b, Asic4, Cacng4, Slc13a5, Kcnk2, Slc4a4, Slc39a14, Slc28a3, Ryr2, Cacna2d3, Kcng4
171	GO:0005539	MF	glycosaminoglycan binding	1.809825524677985e-4	27	Apoe, Smoc2, Pcsk6, Hapln3, Mamdc2, Sema5a, Vcan, Reg1a, Lrtm2, Cd44, Ccn3, Col5a3, PCOLCE2, Serpine2, Grem2, Lamc2, Serpinc1, Fgf9, H1f1, App, Lpl, Comp, Fgf1, Hbegf, Adgrg1, Hk1, Mpig6b
172	GO:0022836	MF	gated channel activity	0.019359746561259265	27	Ttyh1, Kcnc3, Ano5, Kcnk4, Kcnab1, Trpc3, Grin2b, Kcna4, Snap25, Ncs1, Gabrr2, Clic4, Kcnq4, Ano4, Scn3b, Chrnb4, Chrna3, Chrna5, Asic4, Cacng4, Chrnb1, Kcnk2, Cnga1, Ryr2, Clic6, Cacna2d3, Kcng4
173	GO:1901681	MF	sulfur compound binding	0.00815831433186977	25	Apoe, Smoc2, Pcsk6, Sema5a, Gstm7, Lrtm2, Slc6a6, Ccn3, Col5a3, PCOLCE2, Serpine2, Grem2, Lamc2, Serpinc1, Fgf9, H1f1, Ryr2, App, Lpl, Comp, Fgf1, Hbegf, Adgrg1, Mpig6b, Acacb
174	GO:0050839	MF	cell adhesion molecule binding	0.01814539350025734	25	Mfge8, Nphs1, Pvr, Gfra1, Itga10, Sfrp2, Grin2b, Frmd5, Fermt1, Plxnb3, Egfl6, Myh9, Ccn3, Sema7a, Col4a3, Igsf9, Pkp1, Nf2, App, Comp, Tenm3, Fgf1, Cd226, Cdh1, Ctnna3
175	GO:0008201	MF	heparin binding	0.001454155748804746	20	Apoe, Smoc2, Pcsk6, Lrtm2, Ccn3, Col5a3, PCOLCE2, Serpine2, Grem2, Lamc2, Serpinc1, Fgf9, H1f1, App, Lpl, Comp, Fgf1, Hbegf, Adgrg1, Mpig6b
176	GO:0001653	MF	peptide receptor activity	0.007292500432454301	18	Nlrp6, F2rl2, Tacr1, Gucy2c, Aplnr, Npr2, Oprk1, Gpr143, Agtr2, Fshr, Gpr182, Avpr1a, Ccr9, Cxcr2, Crhr1, Gpr37l1, Ramp3, Npffr1
177	GO:0043177	MF	organic acid binding	0.015523856258207246	17	Folr1, S100a8, Lrat, Grm8, Grin2b, Slc6a6, Ass1, Gpr143, Otc, Serpina5, Vdr, Cps1, Hba-a3, Nags, Ryr2, Mat1a, Acacb
178	GO:0005125	MF	cytokine activity	0.049112587332303705	17	Bmp2, Gdf5, Bmp15, Tnfrsf11b, Wnt10a, Ccl20, Wnt6, Inha, Wnt9b, Gdf9, Inhbb, Grem2, Cxcl14, Inhba, Gdf10, Crlf1, Il34
179	GO:0008083	MF	growth factor activity	0.01814539350025734	16	Fgf3, Reg1a, Bmp2, Gdf5, Bmp15, Ccn3, Inha, Fgf18, Gdf9, Inhbb, Fgf9, Inhba, Gdf10, Fgf1, Hbegf, Il34
180	GO:0008528	MF	G protein-coupled peptide receptor activity	0.01814539350025734	16	Nlrp6, F2rl2, Tacr1, Aplnr, Oprk1, Gpr143, Agtr2, Fshr, Gpr182, Avpr1a, Ccr9, Cxcr2, Crhr1, Gpr37l1, Ramp3, Npffr1
181	GO:0005178	MF	integrin binding	0.01814539350025734	16	Mfge8, Gfra1, Itga10, Sfrp2, Frmd5, Fermt1, Egfl6, Myh9, Ccn3, Sema7a, Col4a3, Nf2, App, Comp, Fgf1, Cd226
182	GO:0003774	MF	cytoskeletal motor activity	0.007242667541575736	14	Myo10, Dync1i1, Kif2c, Myh9, Kif9, Kif15, Myo1b, Dnai2, Myh1, Kif14, Myh6, Myh7, Myh15, Dnah8
183	GO:0016209	MF	antioxidant activity	0.013529968467154117	12	Apoe, Gsto2, Glrx, S100a8, S100a9, Gstm7, Duox1, Tp53inp1, Gpx2, Txndc2, Hba-a3, Ptgs2
184	GO:0042562	MF	hormone binding	0.01814539350025734	12	Crym, Anxa5, Gucy2c, Npr2, Fshr, Esr2, Avpr1a, Amhr2, Ucn2, Pgr, Crhr1, Inhba
185	GO:0072341	MF	modified amino acid binding	0.03384180709630091	12	Mfge8, Syt7, Folr1, Gstm7, Gpr143, Gsdmd, Adgrb1, Cps1, Cd300a, Havcr1, Mark1, Gap43
186	GO:0036122	MF	BMP binding	0.0014286183984563554	7	Bmpr1b, Gdf5, Chrdl1, Sostdc1, Tcap, Grem2, Comp
187	GO:0098918	MF	structural constituent of synapse	0.0172625349551429	7	Dlg2, Pclo, LOC100361457, Bsn, Rims1, Actg1, Erc2
188	GO:0043394	MF	proteoglycan binding	0.032014559147639884	7	Apoe, Sema5a, Tnc, Col5a3, App, Lpl, Comp
189	GO:0000146	MF	microfilament motor activity	0.03015309095720929	6	Myo10, Myh9, Myo1b, Myh1, Myh6, Myh7
190	GO:0005104	MF	fibroblast growth factor receptor binding	0.03015309095720929	6	Fgf3, Flrt3, Fgf18, Fgf9, Fgf1, Kl
191	GO:0015645	MF	fatty acid ligase activity	0.04047572589619671	5	Acsm5, Acsbg1, Acsl3, Acsl6, Acsl1
192	GO:0042165	MF	neurotransmitter binding	0.04669545569807237	5	Grin2b, Chrnb4, Chrna3, Chrna5, Chrnb1
193	GO:0043395	MF	heparan sulfate proteoglycan binding	0.04669545569807237	5	Apoe, Sema5a, App, Lpl, Comp
194	GO:0042166	MF	acetylcholine binding	0.035436672884430746	4	Chrnb4, Chrna3, Chrna5, Chrnb1
195	GO:0045503	MF	dynein light chain binding	0.035436672884430746	4	Pvr, Dync1i1, Bsn, Dnai2
